# Supplementary material for: Unprecedented Fluorescent Dinuclear CoII and ZnII Coordination Compounds with a Symmetric Bis(salamo)-Like Tetraoxime
Source: MDPI journal article supplement (doi:10.3390/molecules23051141), 2018-05-10

# checkCIF/PLATON report

You have not supplied any structure factors. As a result the full set of tests cannot be run.

THIS REPORT IS FOR GUIDANCE ONLY. IF USED AS PART OF A REVIEW PROCEDURE FOR PUBLICATION, IT SHOULD NOT REPLACE THE EXPERTISE OF AN EXPERIENCED CRYSTALLOGRAPHIC REFEREE.

No syntax errors found.      CIF dictionary      Interpreting this report

## Datablock: x\_sq

---

Bond precision:    C-C = 0.0066 Å

Wavelength=0.71073

Cell:                a=15.244(2)                b=18.674(3)                c=21.356(3)  
                      alpha=109.512(4)        beta=97.335(4)        gamma=109.429(4)  
Temperature:        291 K

|                | Calculated                                                     | Reported                                        |
|----------------|----------------------------------------------------------------|-------------------------------------------------|
| Volume         | 5205.3(13)                                                     | 5205.4(14)                                      |
| Space group    | P -1                                                           | P -1                                            |
| Hall group     | -P 1                                                           | -P 1                                            |
| Moiety formula | C32 H30 Br4 Co2 N4 O9, C31<br>H30 Br4 Co2 N4 O8 [+<br>solvent] | C32 H30 Br4 Co2 N4 O9, C31<br>H30 Br4 Co2 N4 O8 |
| Sum formula    | C63 H60 Br8 Co4 N8 O17 [+<br>solvent]                          | C63 H60 Br8 Co4 N8 O17                          |
| Mr             | 2076.11                                                        | 2076.19                                         |
| Dx,g cm-3      | 1.325                                                          | 1.325                                           |
| Z              | 2                                                              | 2                                               |
| Mu (mm-1)      | 3.747                                                          | 3.747                                           |
| F000           | 2036.0                                                         | 2036.0                                          |
| F000'          | 2035.17                                                        |                                                 |
| h,k,lmax       | 19,23,27                                                       | 19,23,27                                        |
| Nref           | 22753                                                          | 22025                                           |
| Tmin,Tmax      | 0.450,0.549                                                    | 0.490,0.590                                     |
| Tmin'          | 0.434                                                          |                                                 |

Correction method= # Reported T Limits: Tmin=0.490 Tmax=0.590  
AbsCorr = MULTI-SCAN

Data completeness= 0.968

Theta(max)= 27.000

R(reflections)= 0.0438( 13952)

wR2(reflections)= 0.0977( 22025)

S = 1.005

Npar= 909

---

The following ALERTS were generated. Each ALERT has the format

**test-name\_ALERT\_alert-type\_alert-level.**

Click on the hyperlinks for more details of the test.

---

● **Alert level C**

|                   |                         |           |        |   |              |
|-------------------|-------------------------|-----------|--------|---|--------------|
| PLAT230_ALERT_2_C | Hirshfeld Test Diff for | O9        | --C57  | . | 6.7 s.u.     |
| PLAT230_ALERT_2_C | Hirshfeld Test Diff for | O14       | --C39  | . | 6.0 s.u.     |
| PLAT230_ALERT_2_C | Hirshfeld Test Diff for | C43       | --C44  | . | 5.7 s.u.     |
| PLAT230_ALERT_2_C | Hirshfeld Test Diff for | Br3       | --C23  | . | 6.0 s.u.     |
| PLAT230_ALERT_2_C | Hirshfeld Test Diff for | C3        | --C4   | . | 5.2 s.u.     |
| PLAT341_ALERT_3_C | Low Bond Precision on   | C-C Bonds | .....  |   | 0.00665 Ang. |
| PLAT412_ALERT_2_C | Short Intra XH3 .. XHn  | H14       | ..H30B |   | 1.82 Ang.    |

---

● **Alert level G**

|                   |                                                    |                        |       |  |              |
|-------------------|----------------------------------------------------|------------------------|-------|--|--------------|
| PLAT003_ALERT_2_G | Number of Uiso or Uij Restrained non-H Atoms ...   |                        |       |  | 2 Report     |
| PLAT154_ALERT_1_G | The s.u.'s on the Cell Angles are Equal ..(Note)   |                        |       |  | 0.004 Degree |
| PLAT177_ALERT_4_G | The CIF-Embedded .res File Contains DELU Records   |                        |       |  | 1 Report     |
| PLAT232_ALERT_2_G | Hirshfeld Test Diff (M-X) Co3                      | --O17                  | .     |  | 7.8 s.u.     |
| PLAT335_ALERT_2_G | Check Large C6 Ring C-C Range C42                  | -C47                   |       |  | 0.16 Ang.    |
| PLAT395_ALERT_2_G | Deviating X-O-Y                                    | Angle From 120 for O10 |       |  | 108.4 Degree |
| PLAT395_ALERT_2_G | Deviating X-O-Y                                    | Angle From 120 for O11 |       |  | 112.1 Degree |
| PLAT395_ALERT_2_G | Deviating X-O-Y                                    | Angle From 120 for O13 |       |  | 110.2 Degree |
| PLAT395_ALERT_2_G | Deviating X-O-Y                                    | Angle From 120 for O14 |       |  | 110.5 Degree |
| PLAT395_ALERT_2_G | Deviating X-O-Y                                    | Angle From 120 for O2  |       |  | 108.6 Degree |
| PLAT395_ALERT_2_G | Deviating X-O-Y                                    | Angle From 120 for O3  |       |  | 109.1 Degree |
| PLAT395_ALERT_2_G | Deviating X-O-Y                                    | Angle From 120 for O5  |       |  | 110.6 Degree |
| PLAT395_ALERT_2_G | Deviating X-O-Y                                    | Angle From 120 for O6  |       |  | 110.4 Degree |
| PLAT432_ALERT_2_G | Short Inter X...Y Contact                          | Br2                    | ..C61 |  | 3.28 Ang.    |
| PLAT432_ALERT_2_G | Short Inter X...Y Contact                          | O11                    | ..C62 |  | 2.95 Ang.    |
| PLAT434_ALERT_2_G | Short Inter HL..HL Contact                         | Br3                    | ..Br6 |  | 3.60 Ang.    |
| PLAT606_ALERT_4_G | VERY LARGE Solvent Accessible VOID(S) in Structure |                        |       |  | ! Info       |
| PLAT794_ALERT_5_G | Tentative Bond Valency for Co1                     | (II)                   | .     |  | 2.04 Info    |
| PLAT794_ALERT_5_G | Tentative Bond Valency for Co2                     | (II)                   | .     |  | 1.98 Info    |
| PLAT794_ALERT_5_G | Tentative Bond Valency for Co3                     | (II)                   | .     |  | 1.99 Info    |
| PLAT794_ALERT_5_G | Tentative Bond Valency for Co4                     | (II)                   | .     |  | 1.93 Info    |
| PLAT802_ALERT_4_G | CIF Input Record(s) with more than 80 Characters   |                        |       |  | 1 Info       |
| PLAT860_ALERT_3_G | Number of Least-Squares Restraints .....           |                        |       |  | 1 Note       |
| PLAT869_ALERT_4_G | ALERTS Related to the Use of SQUEEZE Suppressed    |                        |       |  | ! Info       |
| PLAT933_ALERT_2_G | Number of OMIT Records in Embedded .res File ...   |                        |       |  | 6 Note       |

---

0 **ALERT level A** = Most likely a serious problem - resolve or explain

0 **ALERT level B** = A potentially serious problem, consider carefully

7 **ALERT level C** = Check. Ensure it is not caused by an omission or oversight

25 **ALERT level G** = General information/check it is not something unexpected

1 ALERT type 1 CIF construction/syntax error, inconsistent or missing data

21 ALERT type 2 Indicator that the structure model may be wrong or deficient

2 ALERT type 3 Indicator that the structure quality may be low

4 ALERT type 4 Improvement, methodology, query or suggestion

4 ALERT type 5 Informative message, check

---

It is advisable to attempt to resolve as many as possible of the alerts in all categories. Often the minor alerts point to easily fixed oversights, errors and omissions in your CIF or refinement strategy, so attention to these fine details can be worthwhile. In order to resolve some of the more serious problems it may be necessary to carry out additional measurements or structure refinements. However, the purpose of your study may justify the reported deviations and the more serious of these should normally be commented upon in the discussion or experimental section of a paper or in the "special\_details" fields of the CIF. checkCIF was carefully designed to identify outliers and unusual parameters, but every test has its limitations and alerts that are not important in a particular case may appear. Conversely, the absence of alerts does not guarantee there are no aspects of the results needing attention. It is up to the individual to critically assess their own results and, if necessary, seek expert advice.

### **Publication of your CIF in IUCr journals**

A basic structural check has been run on your CIF. These basic checks will be run on all CIFs submitted for publication in IUCr journals (*Acta Crystallographica*, *Journal of Applied Crystallography*, *Journal of Synchrotron Radiation*); however, if you intend to submit to *Acta Crystallographica Section C* or *E* or *IUCrData*, you should make sure that full publication checks are run on the final version of your CIF prior to submission.

### **Publication of your CIF in other journals**

Please refer to the *Notes for Authors* of the relevant journal for any special instructions relating to CIF submission.

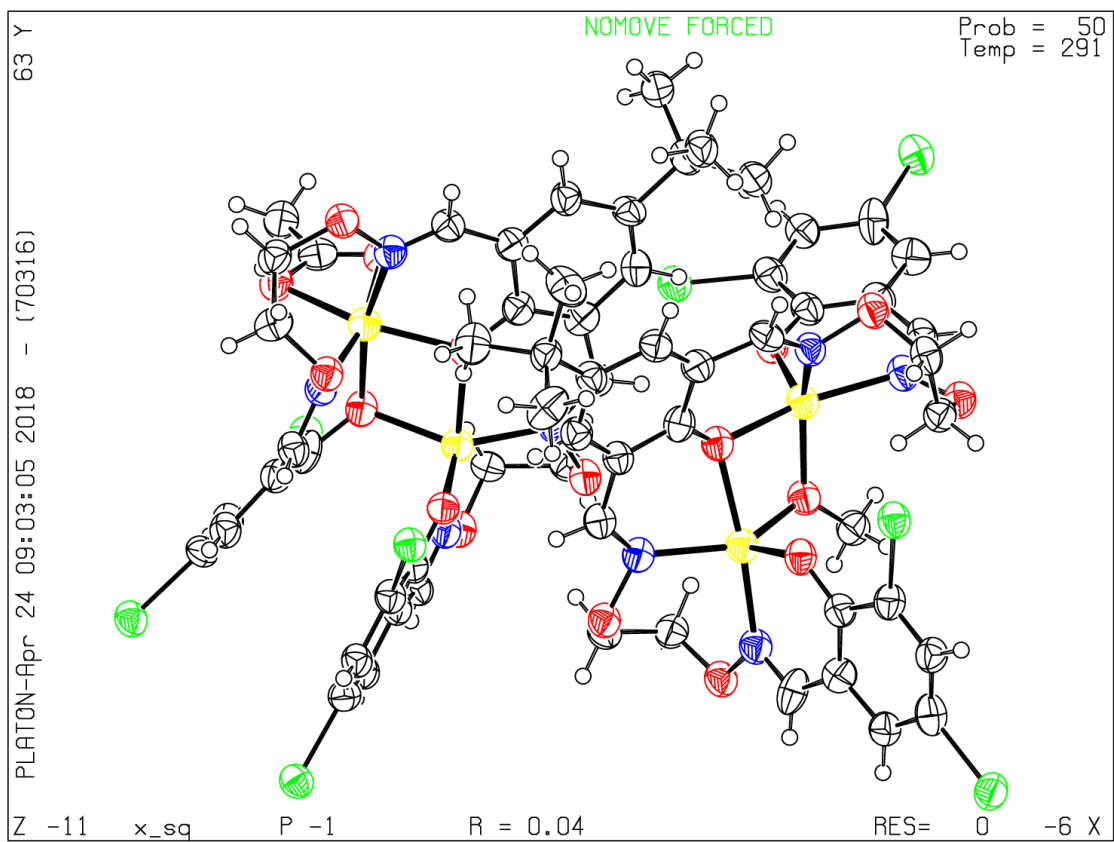

Supplement: s1 [file s1]
