# Supplementary material for: Unprecedented Fluorescent Dinuclear CoII and ZnII Coordination Compounds with a Symmetric Bis(salamo)-Like Tetraoxime
Source: Molecules. 2018 May 10;23(5):1141. doi: 10.3390/molecules23051141 (PMC6099918; doi:10.3390/molecules23051141)
Supplement: Supplementary file 1 [file molecules-23-01141-s001.zip]

Archive with 5 entries (5 files):
- Co coordination compound.cif
- Supplementary Information.doc
- Zn coordination compound checkcif report.pdf
- Zn coordination compound.cif
- Co coordination compound checkcif report.pdf
