# Supplementary material for: Unprecedented Fluorescent Dinuclear CoII and ZnII Coordination Compounds with a Symmetric Bis(salamo)-Like Tetraoxime
Source: Molecules. 2018 May 10;23(5):1141. doi: 10.3390/molecules23051141 (PMC6099918; doi:10.3390/molecules23051141)
Supplement: Supplementary file 1 [file molecules-23-01141-s001.zip › Co coordination compound.cif]

 
data_x_sq
 
_audit_creation_method            'SHELXL-2016/6'
_shelx_SHELXL_version_number      '2016/6'
_chemical_name_systematic         ?
_chemical_name_common             ?
_chemical_melting_point           ?
_chemical_formula_moiety          'C32 H30 Br4 Co2 N4 O9, C31 H30 Br4 Co2 N4 O8 '
_chemical_formula_sum             'C63 H60 Br8 Co4 N8 O17 ' 
_chemical_formula_weight          2076.19

loop_
 _atom_type_symbol
 _atom_type_description
 _atom_type_scat_dispersion_real
 _atom_type_scat_dispersion_imag
 _atom_type_scat_source
 'C'  'C'   0.0033   0.0016
 'International Tables Vol C Tables 4.2.6.8 and 6.1.1.4'
 'H'  'H'   0.0000   0.0000
 'International Tables Vol C Tables 4.2.6.8 and 6.1.1.4'
 'Br'  'Br'  -0.2901   2.4595
 'International Tables Vol C Tables 4.2.6.8 and 6.1.1.4'
 'Co'  'Co'   0.3494   0.9721
 'International Tables Vol C Tables 4.2.6.8 and 6.1.1.4'
 'N'  'N'   0.0061   0.0033
 'International Tables Vol C Tables 4.2.6.8 and 6.1.1.4'
 'O'  'O'   0.0106   0.0060
 'International Tables Vol C Tables 4.2.6.8 and 6.1.1.4'
 
_space_group_crystal_system       triclinic
_space_group_IT_number            2
_space_group_name_H-M_alt         'P -1'
_space_group_name_Hall            '-P 1'
 
_shelx_space_group_comment
;
The symmetry employed for this shelxl refinement is uniquely defined
by the following loop, which should always be used as a source of
symmetry information in preference to the above space-group names.
They are only intended as comments.
;
 
loop_
 _space_group_symop_operation_xyz
 'x, y, z'
 '-x, -y, -z'
 
_cell_length_a                    15.244(2)
_cell_length_b                    18.674(3)
_cell_length_c                    21.356(3)
_cell_angle_alpha                 109.512(4)
_cell_angle_beta                  97.335(4)
_cell_angle_gamma                 109.429(4)
_cell_volume                      5205.4(14)
_cell_formula_units_Z             2
_cell_measurement_temperature     291(2)
_cell_measurement_reflns_used     3915
_cell_measurement_theta_min       2.15
_cell_measurement_theta_max       25.32
 
_exptl_crystal_description        block
_exptl_crystal_colour             brown
_exptl_crystal_density_meas       ?
_exptl_crystal_density_method     ?
_exptl_crystal_density_diffrn     1.325          
_exptl_crystal_F_000              2036
_exptl_transmission_factor_min    ?
_exptl_transmission_factor_max    ?
_exptl_crystal_size_max           0.220
_exptl_crystal_size_mid           0.180
_exptl_crystal_size_min           0.160
_exptl_absorpt_coefficient_mu     3.747
_shelx_estimated_absorpt_T_min    0.493
_shelx_estimated_absorpt_T_max    0.586
_exptl_absorpt_correction_type    'multi-scan'
_exptl_absorpt_correction_T_min   0.49
_exptl_absorpt_correction_T_max   0.59
_exptl_absorpt_process_details    'SADABS; Bruker, 2008'
_exptl_absorpt_special_details    ?
_diffrn_ambient_temperature       291(2)
_diffrn_radiation_wavelength      0.71073
_diffrn_radiation_type            MoK\a
_diffrn_source                    ?
_diffrn_measurement_device_type   'Bruker APEX-II CCD'
_diffrn_measurement_method        '\f and \w scans'
_diffrn_detector_area_resol_mean  ?
_diffrn_reflns_number             37783
_diffrn_reflns_av_unetI/netI      0.0722
_diffrn_reflns_av_R_equivalents   0.0210
_diffrn_reflns_limit_h_min        -19
_diffrn_reflns_limit_h_max        16
_diffrn_reflns_limit_k_min        -22
_diffrn_reflns_limit_k_max        23
_diffrn_reflns_limit_l_min        -27
_diffrn_reflns_limit_l_max        26
_diffrn_reflns_theta_min          1.050
_diffrn_reflns_theta_max          27.000
_diffrn_reflns_theta_full         25.242
_diffrn_measured_fraction_theta_max   0.968
_diffrn_measured_fraction_theta_full  0.966
_diffrn_reflns_Laue_measured_fraction_max    0.968
_diffrn_reflns_Laue_measured_fraction_full   0.966
_diffrn_reflns_point_group_measured_fraction_max   0.968
_diffrn_reflns_point_group_measured_fraction_full  0.966
_reflns_number_total              22025
_reflns_number_gt                 13952
_reflns_threshold_expression      'I > 2\s(I)'
_reflns_Friedel_coverage          0.000
_reflns_Friedel_fraction_max      .
_reflns_Friedel_fraction_full     .
 
_reflns_special_details
;
 Reflections were merged by SHELXL according to the crystal
 class for the calculation of statistics and refinement.
 
 Structure factors included contributions from the .fab file.
 
 _reflns_Friedel_fraction is defined as the number of unique
 Friedel pairs measured divided by the number that would be
 possible theoretically, ignoring centric projections and
 systematic absences.
;
 
_computing_data_collection      'SMART (Bruker, 2008)'
_computing_cell_refinement      'SMART'
_computing_data_reduction       'SAINT (Bruker, 2008)'
_computing_structure_solution   'SHELXTL (Bruker, 2008)'
_computing_structure_refinement 'SHELXL-2016/6 (Sheldrick, 2016)'
_computing_molecular_graphics   'SHELXTL (Bruker, 2008)'
_computing_publication_material 'SHELXTL (Bruker, 2008)'
_refine_special_details           ?
_refine_ls_structure_factor_coef  Fsqd
_refine_ls_matrix_type            full
_refine_ls_weighting_scheme       calc
_refine_ls_weighting_details
'w=1/[\s^2^(Fo^2^)+(0.04P)^2^+1.55P] where P=(Fo^2^+2Fc^2^)/3'
_atom_sites_solution_primary      ?
_atom_sites_solution_secondary    ?
_atom_sites_solution_hydrogens    geom
_refine_ls_hydrogen_treatment     constr
_refine_ls_extinction_method      none
_refine_ls_extinction_coef        .
_refine_ls_number_reflns          22025
_refine_ls_number_parameters      909
_refine_ls_number_restraints      1
_refine_ls_R_factor_all           0.0762
_refine_ls_R_factor_gt            0.0438
_refine_ls_wR_factor_ref          0.0977
_refine_ls_wR_factor_gt           0.0932
_refine_ls_goodness_of_fit_ref    1.005
_refine_ls_restrained_S_all       1.005
_refine_ls_shift/su_max           0.001
_refine_ls_shift/su_mean          0.000
 
loop_
 _atom_site_label
 _atom_site_type_symbol
 _atom_site_fract_x
 _atom_site_fract_y
 _atom_site_fract_z
 _atom_site_U_iso_or_equiv
 _atom_site_adp_type
 _atom_site_occupancy
 _atom_site_site_symmetry_order  
 _atom_site_calc_flag
 _atom_site_refinement_flags_posn
 _atom_site_refinement_flags_adp
 _atom_site_refinement_flags_occupancy
 _atom_site_disorder_assembly
 _atom_site_disorder_group
Br1 Br 0.62535(3) 0.31904(3) 0.19144(2) 0.04656(11) Uani 1 1 d . . . . .
Br2 Br 0.46662(3) -0.01278(3) 0.16549(2) 0.05239(12) Uani 1 1 d . . . . .
Br3 Br 0.11936(3) 0.50180(3) -0.15709(2) 0.05339(13) Uani 1 1 d . . . . .
Br4 Br 0.15201(3) 0.58212(3) 0.12490(2) 0.04683(11) Uani 1 1 d . . . . .
Br5 Br 0.50666(3) 0.63680(3) 0.59399(2) 0.04138(11) Uani 1 1 d . . . . .
Br6 Br 0.21758(3) 0.46446(3) 0.69646(2) 0.04427(11) Uani 1 1 d . . . . .
Br7 Br 0.03295(3) 0.70896(3) 0.47723(2) 0.04487(11) Uani 1 1 d . . . . .
Br8 Br 0.11881(3) 0.70342(3) 0.74155(2) 0.04743(12) Uani 1 1 d . . . . .
C1 C 0.4434(3) 0.2462(3) 0.2153(2) 0.0420(10) Uani 1 1 d . . . . .
C2 C 0.5246(3) 0.2332(3) 0.1954(2) 0.0443(10) Uani 1 1 d . . . . .
C3 C 0.5313(3) 0.1587(3) 0.1827(2) 0.0460(11) Uani 1 1 d . . . . .
H3 H 0.586844 0.152307 0.173268 0.055 Uiso 1 1 calc R U . . .
C4 C 0.4586(3) 0.0945(3) 0.1837(2) 0.0511(12) Uani 1 1 d . . . . .
C5 C 0.3802(3) 0.1007(3) 0.2040(2) 0.0460(11) Uani 1 1 d . . . . .
H5 H 0.334926 0.056494 0.208814 0.055 Uiso 1 1 calc R U . . .
C6 C 0.3684(3) 0.1772(3) 0.2178(2) 0.0469(11) Uani 1 1 d . . . . .
C7 C 0.2807(3) 0.1801(3) 0.2363(2) 0.0528(12) Uani 1 1 d . . . . .
H7 H 0.242033 0.136419 0.245298 0.063 Uiso 1 1 calc R U . . .
C8 C 0.1372(3) 0.2914(3) 0.2698(2) 0.0450(11) Uani 1 1 d . . . . .
H8A H 0.067539 0.273044 0.256572 0.054 Uiso 1 1 calc R U . . .
H8B H 0.163173 0.320986 0.242148 0.054 Uiso 1 1 calc R U . . .
C9 C 0.1748(3) 0.3492(3) 0.3431(2) 0.0446(11) Uani 1 1 d . . . . .
H9A H 0.157976 0.396249 0.348235 0.054 Uiso 1 1 calc R U . . .
H9B H 0.141435 0.321457 0.369523 0.054 Uiso 1 1 calc R U . . .
C10 C 0.3928(3) 0.4904(3) 0.3750(2) 0.0421(10) Uani 1 1 d . . . . .
H10 H 0.391232 0.507725 0.420877 0.051 Uiso 1 1 calc R U . . .
C11 C 0.4697(3) 0.5453(3) 0.3581(2) 0.0395(10) Uani 1 1 d . . . . .
C12 C 0.5437(3) 0.6121(3) 0.4103(2) 0.0422(10) Uani 1 1 d . . . . .
H12 H 0.538612 0.622917 0.455164 0.051 Uiso 1 1 calc R U . . .
C13 C 0.6253(3) 0.6647(3) 0.4014(2) 0.0402(10) Uani 1 1 d . . . . .
C14 C 0.6307(3) 0.6442(3) 0.3321(2) 0.0422(10) Uani 1 1 d . . . . .
H14 H 0.686209 0.674250 0.323177 0.051 Uiso 1 1 calc R U . . .
C15 C 0.5547(3) 0.5800(3) 0.2772(2) 0.0429(10) Uani 1 1 d . . . . .
C16 C 0.4677(3) 0.5274(3) 0.2883(2) 0.0429(10) Uani 1 1 d . . . . .
C17 C 0.5688(3) 0.5563(3) 0.2077(2) 0.0422(10) Uani 1 1 d . . . . .
H17 H 0.628890 0.585080 0.203331 0.051 Uiso 1 1 calc R U . . .
C18 C 0.5664(3) 0.4195(3) 0.0724(2) 0.0472(11) Uani 1 1 d . . . . .
H18A H 0.617180 0.424708 0.108210 0.057 Uiso 1 1 calc R U . . .
H18B H 0.589829 0.414865 0.031694 0.057 Uiso 1 1 calc R U . . .
C19 C 0.4804(3) 0.3421(3) 0.0561(2) 0.0453(11) Uani 1 1 d . . . . .
H19A H 0.500190 0.296040 0.042778 0.054 Uiso 1 1 calc R U . . .
H19B H 0.460610 0.345723 0.098019 0.054 Uiso 1 1 calc R U . . .
C20 C 0.3110(3) 0.3854(3) -0.0198(2) 0.0462(11) Uani 1 1 d . . . . .
H20 H 0.312698 0.354627 -0.063700 0.055 Uiso 1 1 calc R U . . .
C21 C 0.2555(3) 0.4378(3) -0.0153(2) 0.0446(11) Uani 1 1 d . . . . .
C22 C 0.2162(3) 0.4407(3) -0.0763(2) 0.0499(11) Uani 1 1 d . . . . .
H22 H 0.226569 0.411419 -0.117407 0.060 Uiso 1 1 calc R U . . .
C23 C 0.1617(3) 0.4870(3) -0.0761(2) 0.0539(12) Uani 1 1 d . . . . .
C24 C 0.1426(3) 0.5284(3) -0.0151(2) 0.0443(11) Uani 1 1 d . . . . .
H24 H 0.104675 0.558433 -0.015147 0.053 Uiso 1 1 calc R U . . .
C25 C 0.1805(3) 0.5241(3) 0.0454(2) 0.0466(11) Uani 1 1 d . . . . .
C26 C 0.2380(3) 0.4797(3) 0.0464(2) 0.0419(10) Uani 1 1 d . . . . .
C27 C 0.7094(3) 0.7352(3) 0.4608(2) 0.0446(11) Uani 1 1 d . . . . .
C28 C 0.6743(3) 0.7919(3) 0.5093(2) 0.0571(13) Uani 1 1 d . . . . .
H28A H 0.676083 0.836094 0.495384 0.086 Uiso 1 1 calc R U . . .
H28B H 0.715130 0.814694 0.555317 0.086 Uiso 1 1 calc R U . . .
H28C H 0.609214 0.761042 0.508262 0.086 Uiso 1 1 calc R U . . .
C29 C 0.7649(3) 0.7011(3) 0.5009(2) 0.0597(13) Uani 1 1 d . . . . .
H29A H 0.795503 0.741333 0.547562 0.089 Uiso 1 1 calc R U . . .
H29B H 0.813145 0.690170 0.479168 0.089 Uiso 1 1 calc R U . . .
H29C H 0.720598 0.650686 0.501015 0.089 Uiso 1 1 calc R U . . .
C30 C 0.7859(3) 0.7931(3) 0.4402(2) 0.0697(16) Uani 1 1 d . . . . .
H30A H 0.786117 0.847647 0.458438 0.104 Uiso 1 1 calc R U . . .
H30B H 0.771339 0.772557 0.390790 0.104 Uiso 1 1 calc R U . . .
H30C H 0.848196 0.795460 0.458299 0.104 Uiso 1 1 calc R U . . .
C31 C 0.2229(3) 0.2594(3) 0.0931(2) 0.0482(11) Uani 1 1 d . . . . .
H31A H 0.200632 0.265679 0.051933 0.072 Uiso 1 1 calc R U . . .
H31B H 0.168460 0.231848 0.106960 0.072 Uiso 1 1 calc R U . . .
H31C H 0.260828 0.226890 0.084251 0.072 Uiso 1 1 calc R U . . .
C32 C 0.3045(3) 0.5741(3) 0.5302(2) 0.0407(10) Uani 1 1 d . . . . .
C33 C 0.3755(3) 0.5810(2) 0.5882(2) 0.0398(10) Uani 1 1 d . . . . .
C34 C 0.3517(3) 0.5477(2) 0.6372(2) 0.0408(10) Uani 1 1 d . . . . .
H34 H 0.398666 0.552506 0.672511 0.049 Uiso 1 1 calc R U . . .
C35 C 0.2533(3) 0.5073(2) 0.6294(2) 0.0403(10) Uani 1 1 d . . . . .
C36 C 0.1816(3) 0.4970(2) 0.5770(2) 0.0396(10) Uani 1 1 d . . . . .
H36 H 0.117154 0.467869 0.573355 0.048 Uiso 1 1 calc R U . . .
C37 C 0.2066(3) 0.5306(2) 0.5295(2) 0.0388(10) Uani 1 1 d . . . . .
C38 C 0.1254(3) 0.5145(3) 0.4748(2) 0.0393(10) Uani 1 1 d . . . . .
H38 H 0.063932 0.480683 0.473427 0.047 Uiso 1 1 calc R U . . .
C39 C 0.0453(3) 0.5475(3) 0.3324(2) 0.0410(10) Uani 1 1 d . . . . .
H39A H 0.093272 0.604217 0.352585 0.049 Uiso 1 1 calc R U . . .
H39B H -0.016505 0.548278 0.315561 0.049 Uiso 1 1 calc R U . . .
C40 C 0.0729(3) 0.4951(3) 0.2714(2) 0.0410(10) Uani 1 1 d . . . . .
H40A H 0.022512 0.439497 0.249829 0.049 Uiso 1 1 calc R U . . .
H40B H 0.075680 0.519013 0.237327 0.049 Uiso 1 1 calc R U . . .
C41 C 0.2855(3) 0.5883(2) 0.2808(2) 0.0404(10) Uani 1 1 d . . . . .
H41 H 0.266401 0.547497 0.236363 0.049 Uiso 1 1 calc R U . . .
C42 C 0.3675(3) 0.6673(3) 0.2962(2) 0.0413(10) Uani 1 1 d . . . . .
C43 C 0.4082(3) 0.6774(3) 0.2403(2) 0.0457(11) Uani 1 1 d . . . . .
H43 H 0.382983 0.632887 0.197484 0.055 Uiso 1 1 calc R U . . .
C44 C 0.4778(3) 0.7448(3) 0.2465(2) 0.0409(10) Uani 1 1 d . . . . .
C45 C 0.5170(3) 0.8106(3) 0.3107(2) 0.0434(10) Uani 1 1 d . . . . .
H45 H 0.567679 0.858891 0.316302 0.052 Uiso 1 1 calc R U . . .
C46 C 0.4821(3) 0.8058(3) 0.3668(2) 0.0416(10) Uani 1 1 d . . . . .
C47 C 0.4033(3) 0.7310(3) 0.3609(2) 0.0422(10) Uani 1 1 d . . . . .
C48 C 0.5338(3) 0.8799(3) 0.4334(2) 0.0405(10) Uani 1 1 d . . . . .
H48 H 0.594216 0.917616 0.436965 0.049 Uiso 1 1 calc R U . . .
C49 C 0.5460(3) 0.9859(3) 0.6060(2) 0.0466(11) Uani 1 1 d . . . . .
H49A H 0.477120 0.971762 0.598055 0.056 Uiso 1 1 calc R U . . .
H49B H 0.578966 1.044594 0.635299 0.056 Uiso 1 1 calc R U . . .
C50 C 0.5730(3) 0.9368(2) 0.6446(2) 0.0457(11) Uani 1 1 d . . . . .
H50A H 0.642858 0.957310 0.658995 0.055 Uiso 1 1 calc R U . . .
H50B H 0.550587 0.947600 0.685935 0.055 Uiso 1 1 calc R U . . .
C51 C 0.3895(3) 0.7792(3) 0.6172(2) 0.0427(10) Uani 1 1 d . . . . .
H51 H 0.428598 0.771746 0.649584 0.051 Uiso 1 1 calc R U . . .
C52 C 0.2859(3) 0.7484(2) 0.6084(2) 0.0412(10) Uani 1 1 d . . . . .
C53 C 0.2548(3) 0.7348(3) 0.6660(2) 0.0451(11) Uani 1 1 d . . . . .
H53 H 0.298105 0.739382 0.703482 0.054 Uiso 1 1 calc R U . . .
C54 C 0.1594(3) 0.7149(3) 0.6634(2) 0.0427(10) Uani 1 1 d . . . . .
C55 C 0.0892(3) 0.7058(2) 0.6036(2) 0.0450(11) Uani 1 1 d . . . . .
H55 H 0.024838 0.694161 0.603280 0.054 Uiso 1 1 calc R U . . .
C56 C 0.1214(3) 0.7150(2) 0.5495(2) 0.0404(10) Uani 1 1 d . . . . .
C57 C 0.2173(3) 0.7314(3) 0.5473(2) 0.0480(11) Uani 1 1 d . . . . .
C58 C 0.5140(3) 0.7540(3) 0.1847(2) 0.0476(11) Uani 1 1 d . . . . .
C59 C 0.4669(3) 0.6746(3) 0.1167(2) 0.0518(12) Uani 1 1 d . . . . .
H59A H 0.482523 0.631133 0.122604 0.078 Uiso 1 1 calc R U . . .
H59B H 0.490849 0.686155 0.080172 0.078 Uiso 1 1 calc R U . . .
H59C H 0.398045 0.657448 0.105281 0.078 Uiso 1 1 calc R U . . .
C60 C 0.6230(3) 0.7727(3) 0.2050(2) 0.0513(12) Uani 1 1 d . . . . .
H60A H 0.648865 0.803857 0.253924 0.077 Uiso 1 1 calc R U . . .
H60B H 0.656177 0.804351 0.181500 0.077 Uiso 1 1 calc R U . . .
H60C H 0.631430 0.721508 0.192198 0.077 Uiso 1 1 calc R U . . .
C61 C 0.5088(3) 0.8315(3) 0.1799(2) 0.0497(11) Uani 1 1 d . . . . .
H61A H 0.452794 0.837700 0.192832 0.075 Uiso 1 1 calc R U . . .
H61B H 0.504486 0.827202 0.133485 0.075 Uiso 1 1 calc R U . . .
H61C H 0.565735 0.878942 0.210518 0.075 Uiso 1 1 calc R U . . .
C62 C 0.2649(3) 0.8978(3) 0.4698(3) 0.0504(11) Uani 1 1 d . U . . .
C63 C 0.1957(3) 0.9394(3) 0.4643(2) 0.0520(11) Uani 1 1 d . U . . .
H63A H 0.195108 0.951567 0.424023 0.078 Uiso 1 1 calc R U . . .
H63B H 0.216384 0.990014 0.504575 0.078 Uiso 1 1 calc R U . . .
H63C H 0.131962 0.902976 0.460853 0.078 Uiso 1 1 calc R U . . .
Co1 Co 0.33106(4) 0.35033(4) 0.23716(3) 0.04240(14) Uani 1 1 d . . . . .
Co2 Co 0.35991(4) 0.43102(4) 0.13202(3) 0.04248(14) Uani 1 1 d . . . . .
Co3 Co 0.36810(4) 0.82594(3) 0.49327(3) 0.04152(14) Uani 1 1 d . . . . .
Co4 Co 0.26294(4) 0.63357(3) 0.42561(3) 0.04007(14) Uani 1 1 d . . . . .
N1 N 0.2531(2) 0.2399(2) 0.24100(18) 0.0456(9) Uani 1 1 d . . . . .
N2 N 0.3263(2) 0.4195(2) 0.33204(18) 0.0415(8) Uani 1 1 d . . . . .
N3 N 0.5056(2) 0.4994(2) 0.15269(18) 0.0413(8) Uani 1 1 d . . . . .
N4 N 0.3545(2) 0.3786(2) 0.02812(19) 0.0439(9) Uani 1 1 d . . . . .
N5 N 0.4276(2) 0.8168(2) 0.58030(17) 0.0413(8) Uani 1 1 d . . . . .
N6 N 0.5003(2) 0.8941(2) 0.48471(18) 0.0417(8) Uani 1 1 d . . . . .
N7 N 0.2387(2) 0.5712(2) 0.32288(17) 0.0380(8) Uani 1 1 d . . . . .
N8 N 0.1335(2) 0.5443(2) 0.42808(18) 0.0419(8) Uani 1 1 d . . . . .
O1 O 0.44100(19) 0.32009(17) 0.22733(14) 0.0436(7) Uani 1 1 d . . . . .
O2 O 0.16035(19) 0.21949(17) 0.25407(14) 0.0473(7) Uani 1 1 d . . . . .
O3 O 0.27437(19) 0.37972(17) 0.37250(14) 0.0439(7) Uani 1 1 d . . . . .
O4 O 0.39540(19) 0.46741(17) 0.23784(14) 0.0416(7) Uani 1 1 d . . . . .
O5 O 0.54820(19) 0.49344(17) 0.09500(14) 0.0451(7) Uani 1 1 d . . . . .
O6 O 0.4002(2) 0.32308(17) 0.00466(15) 0.0477(7) Uani 1 1 d . . . . .
O7 O 0.27687(18) 0.48302(16) 0.10715(14) 0.0421(7) Uani 1 1 d . . . . .
O8 O 0.27593(19) 0.33258(17) 0.14238(14) 0.0444(7) Uani 1 1 d . . . . .
O9 O 0.24434(18) 0.73207(16) 0.48930(14) 0.0432(7) Uani 1 1 d . . . . .
O10 O 0.53372(18) 0.84721(17) 0.60482(14) 0.0427(7) Uani 1 1 d . . . . .
O11 O 0.57017(19) 0.97080(17) 0.53870(14) 0.0440(7) Uani 1 1 d . . . . .
O12 O 0.36920(18) 0.72954(16) 0.41432(14) 0.0401(7) Uani 1 1 d . . . . .
O13 O 0.16293(18) 0.49002(17) 0.29063(14) 0.0428(7) Uani 1 1 d . . . . .
O14 O 0.03937(18) 0.51521(16) 0.38264(14) 0.0429(7) Uani 1 1 d . . . . .
O15 O 0.33268(18) 0.60609(16) 0.48882(14) 0.0388(7) Uani 1 1 d . . . . .
O16 O 0.30655(19) 0.91329(17) 0.53376(15) 0.0451(7) Uani 1 1 d . . . . .
O17 O 0.28482(19) 0.85373(17) 0.41957(15) 0.0449(7) Uani 1 1 d . . . . .
 
loop_
 _atom_site_aniso_label
 _atom_site_aniso_U_11
 _atom_site_aniso_U_22
 _atom_site_aniso_U_33
 _atom_site_aniso_U_23
 _atom_site_aniso_U_13
 _atom_site_aniso_U_12
Br1 0.0411(2) 0.0497(3) 0.0440(3) 0.0141(2) 0.0129(2) 0.0167(2)
Br2 0.0556(3) 0.0454(3) 0.0498(3) 0.0125(2) 0.0143(2) 0.0195(2)
Br3 0.0483(3) 0.0637(3) 0.0446(3) 0.0189(2) 0.0126(2) 0.0210(2)
Br4 0.0436(2) 0.0502(3) 0.0445(3) 0.0173(2) 0.0121(2) 0.0180(2)
Br5 0.0355(2) 0.0439(2) 0.0417(3) 0.0151(2) 0.01130(19) 0.01417(19)
Br6 0.0385(2) 0.0484(3) 0.0458(3) 0.0196(2) 0.0141(2) 0.0157(2)
Br7 0.0363(2) 0.0437(3) 0.0472(3) 0.0129(2) 0.0105(2) 0.01295(19)
Br8 0.0418(2) 0.0472(3) 0.0454(3) 0.0140(2) 0.0159(2) 0.0118(2)
C1 0.041(2) 0.044(3) 0.040(3) 0.016(2) 0.013(2) 0.017(2)
C2 0.041(2) 0.044(3) 0.041(3) 0.011(2) 0.009(2) 0.016(2)
C3 0.044(3) 0.044(3) 0.047(3) 0.014(2) 0.016(2) 0.018(2)
C4 0.048(3) 0.063(3) 0.038(3) 0.012(2) 0.009(2) 0.026(2)
C5 0.051(3) 0.043(3) 0.040(3) 0.014(2) 0.013(2) 0.016(2)
C6 0.045(3) 0.047(3) 0.046(3) 0.017(2) 0.009(2) 0.018(2)
C7 0.038(2) 0.043(3) 0.046(3) -0.009(2) -0.006(2) 0.012(2)
C8 0.038(2) 0.040(2) 0.051(3) 0.015(2) 0.015(2) 0.012(2)
C9 0.037(2) 0.048(3) 0.046(3) 0.018(2) 0.013(2) 0.012(2)
C10 0.037(2) 0.047(3) 0.042(3) 0.016(2) 0.011(2) 0.018(2)
C11 0.035(2) 0.043(2) 0.039(3) 0.015(2) 0.012(2) 0.016(2)
C12 0.042(2) 0.044(3) 0.043(3) 0.017(2) 0.014(2) 0.019(2)
C13 0.037(2) 0.042(2) 0.037(3) 0.014(2) 0.0115(19) 0.0120(19)
C14 0.039(2) 0.042(2) 0.044(3) 0.017(2) 0.013(2) 0.014(2)
C15 0.040(2) 0.043(3) 0.045(3) 0.018(2) 0.013(2) 0.017(2)
C16 0.040(2) 0.044(3) 0.042(3) 0.012(2) 0.009(2) 0.019(2)
C17 0.037(2) 0.049(3) 0.045(3) 0.025(2) 0.015(2) 0.017(2)
C18 0.040(2) 0.057(3) 0.040(3) 0.015(2) 0.013(2) 0.018(2)
C19 0.045(3) 0.042(3) 0.045(3) 0.015(2) 0.013(2) 0.016(2)
C20 0.043(3) 0.052(3) 0.041(3) 0.015(2) 0.019(2) 0.017(2)
C21 0.041(2) 0.049(3) 0.042(3) 0.019(2) 0.012(2) 0.014(2)
C22 0.041(2) 0.056(3) 0.042(3) 0.019(2) -0.005(2) 0.012(2)
C23 0.041(3) 0.063(3) 0.044(3) 0.003(2) 0.012(2) 0.022(2)
C24 0.039(2) 0.048(3) 0.040(3) 0.016(2) 0.007(2) 0.013(2)
C25 0.039(2) 0.053(3) 0.045(3) 0.020(2) 0.015(2) 0.015(2)
C26 0.037(2) 0.044(3) 0.039(3) 0.016(2) 0.011(2) 0.009(2)
C27 0.043(2) 0.038(2) 0.045(3) 0.011(2) 0.014(2) 0.013(2)
C28 0.046(3) 0.055(3) 0.057(3) 0.012(3) 0.014(2) 0.016(2)
C29 0.052(3) 0.047(3) 0.055(3) 0.006(2) -0.019(2) 0.017(2)
C30 0.055(3) 0.060(3) 0.047(3) 0.010(3) 0.012(2) -0.021(2)
C31 0.049(3) 0.043(3) 0.043(3) 0.013(2) 0.011(2) 0.012(2)
C32 0.041(2) 0.041(2) 0.036(2) 0.011(2) 0.013(2) 0.015(2)
C33 0.033(2) 0.042(2) 0.041(3) 0.013(2) 0.0116(19) 0.0142(19)
C34 0.037(2) 0.042(2) 0.041(3) 0.014(2) 0.014(2) 0.015(2)
C35 0.039(2) 0.040(2) 0.046(3) 0.019(2) 0.014(2) 0.0175(19)
C36 0.037(2) 0.041(2) 0.039(3) 0.013(2) 0.012(2) 0.0157(19)
C37 0.036(2) 0.037(2) 0.037(2) 0.010(2) 0.0116(19) 0.0109(19)
C38 0.038(2) 0.043(2) 0.038(3) 0.016(2) 0.013(2) 0.0154(19)
C39 0.039(2) 0.043(2) 0.044(3) 0.022(2) 0.013(2) 0.014(2)
C40 0.035(2) 0.043(2) 0.040(3) 0.018(2) 0.0085(19) 0.0087(19)
C41 0.035(2) 0.042(2) 0.042(3) 0.015(2) 0.010(2) 0.0147(19)
C42 0.041(2) 0.040(2) 0.039(3) 0.014(2) -0.003(2) 0.017(2)
C43 0.046(3) 0.049(3) 0.043(3) 0.014(2) 0.016(2) 0.023(2)
C44 0.034(2) 0.040(2) 0.043(3) 0.019(2) 0.013(2) 0.0065(19)
C45 0.042(2) 0.042(3) 0.044(3) 0.013(2) 0.017(2) 0.015(2)
C46 0.036(2) 0.043(3) 0.047(3) 0.018(2) 0.014(2) 0.017(2)
C47 0.037(2) 0.042(3) 0.046(3) 0.016(2) 0.013(2) 0.016(2)
C48 0.034(2) 0.043(3) 0.042(3) 0.017(2) 0.010(2) 0.0119(19)
C49 0.044(3) 0.039(2) 0.047(3) 0.011(2) 0.011(2) 0.012(2)
C50 0.038(2) 0.040(3) 0.043(3) 0.014(2) -0.009(2) 0.009(2)
C51 0.037(2) 0.047(3) 0.039(3) 0.013(2) 0.012(2) 0.014(2)
C52 0.040(2) 0.040(2) 0.043(3) 0.014(2) 0.013(2) 0.017(2)
C53 0.041(2) 0.044(3) 0.044(3) 0.012(2) 0.015(2) 0.014(2)
C54 0.041(2) 0.040(2) 0.041(3) 0.016(2) 0.017(2) 0.008(2)
C55 0.037(2) 0.043(3) 0.043(3) 0.009(2) 0.011(2) 0.010(2)
C56 0.035(2) 0.035(2) 0.040(3) 0.008(2) 0.0090(19) 0.0101(19)
C57 0.034(2) 0.039(3) 0.042(3) -0.007(2) -0.004(2) 0.0101(19)
C58 0.048(3) 0.052(3) 0.042(3) 0.019(2) 0.016(2) 0.017(2)
C59 0.057(3) 0.051(3) 0.043(3) 0.018(2) 0.019(2) 0.016(2)
C60 0.049(3) 0.047(3) 0.047(3) 0.012(2) 0.019(2) 0.010(2)
C61 0.053(3) 0.049(3) 0.044(3) 0.016(2) 0.017(2) 0.019(2)
C62 0.038(2) 0.040(3) 0.061(3) 0.020(3) 0.014(2) -0.0001(19)
C63 0.044(3) 0.048(3) 0.055(3) 0.014(2) 0.016(2) 0.013(2)
Co1 0.0386(3) 0.0429(3) 0.0428(4) 0.0148(3) 0.0124(3) 0.0149(3)
Co2 0.0377(3) 0.0461(3) 0.0403(4) 0.0153(3) 0.0116(3) 0.0146(3)
Co3 0.0365(3) 0.0407(3) 0.0422(4) 0.0135(3) 0.0107(3) 0.0125(3)
Co4 0.0358(3) 0.0400(3) 0.0414(3) 0.0144(3) 0.0112(3) 0.0132(3)
N1 0.041(2) 0.045(2) 0.046(2) 0.0145(18) 0.0149(17) 0.0134(17)
N2 0.0346(19) 0.042(2) 0.044(2) 0.0131(18) 0.0106(17) 0.0142(17)
N3 0.039(2) 0.041(2) 0.039(2) 0.0131(18) 0.0135(17) 0.0123(17)
N4 0.038(2) 0.045(2) 0.038(2) 0.0108(19) 0.0082(17) 0.0113(17)
N5 0.0383(19) 0.040(2) 0.046(2) 0.0162(18) 0.0164(17) 0.0148(16)
N6 0.039(2) 0.041(2) 0.041(2) 0.0139(18) 0.0087(17) 0.0137(16)
N7 0.0353(18) 0.039(2) 0.038(2) 0.0136(17) 0.0102(16) 0.0147(16)
N8 0.0348(19) 0.041(2) 0.043(2) 0.0105(18) 0.0126(17) 0.0121(16)
O1 0.0389(16) 0.0459(18) 0.0415(18) 0.0126(15) 0.0110(13) 0.0166(14)
O2 0.0426(17) 0.0477(18) 0.0467(19) 0.0157(15) 0.0169(14) 0.0138(14)
O3 0.0387(16) 0.0436(17) 0.0468(18) 0.0151(15) 0.0154(14) 0.0151(14)
O4 0.0355(15) 0.0441(17) 0.0408(18) 0.0141(15) 0.0107(13) 0.0136(14)
O5 0.0425(16) 0.0475(18) 0.0405(18) 0.0137(15) 0.0148(14) 0.0149(14)
O6 0.0425(17) 0.0450(18) 0.0456(19) 0.0113(15) 0.0136(15) 0.0120(14)
O7 0.0385(16) 0.0430(17) 0.0390(18) 0.0132(15) 0.0100(14) 0.0130(13)
O8 0.0383(16) 0.0443(18) 0.0422(18) 0.0137(15) 0.0115(14) 0.0104(14)
O9 0.0346(15) 0.0424(17) 0.0441(18) 0.0103(14) 0.0104(14) 0.0129(13)
O10 0.0373(16) 0.0433(17) 0.0446(18) 0.0149(15) 0.0137(13) 0.0147(13)
O11 0.0389(16) 0.0430(17) 0.0424(18) 0.0141(15) 0.0103(14) 0.0106(14)
O12 0.0355(15) 0.0406(16) 0.0382(17) 0.0115(14) 0.0087(13) 0.0130(13)
O13 0.0350(15) 0.0452(17) 0.0397(17) 0.0108(14) 0.0089(13) 0.0129(13)
O14 0.0309(15) 0.0433(17) 0.0454(18) 0.0116(15) 0.0081(13) 0.0112(13)
O15 0.0338(15) 0.0370(16) 0.0410(17) 0.0140(14) 0.0102(13) 0.0107(12)
O16 0.0405(16) 0.0413(17) 0.0452(19) 0.0120(15) 0.0100(14) 0.0124(14)
O17 0.0384(16) 0.0418(17) 0.0436(18) 0.0122(15) -0.0050(14) 0.0143(14)
 
_geom_special_details
;
 All esds (except the esd in the dihedral angle between two l.s. planes)
 are estimated using the full covariance matrix.  The cell esds are taken
 into account individually in the estimation of esds in distances, angles
 and torsion angles; correlations between esds in cell parameters are only
 used when they are defined by crystal symmetry.  An approximate (isotropic)
 treatment of cell esds is used for estimating esds involving l.s. planes.
;
 
loop_
 _geom_bond_atom_site_label_1
 _geom_bond_atom_site_label_2
 _geom_bond_distance
 _geom_bond_site_symmetry_2
 _geom_bond_publ_flag
Br1 C2 1.849(4) . ?
Br2 C4 1.959(5) . ?
Br3 C23 1.908(5) . ?
Br4 C25 1.876(4) . ?
Br5 C33 1.888(4) . ?
Br6 C35 1.915(4) . ?
Br7 C56 1.861(4) . ?
Br8 C54 1.903(4) . ?
C1 O1 1.330(5) . ?
C1 C2 1.428(5) . ?
C1 C6 1.433(6) . ?
C2 C3 1.369(6) . ?
C3 C4 1.343(6) . ?
C3 H3 0.9300 . ?
C4 C5 1.348(6) . ?
C5 C6 1.436(6) . ?
C5 H5 0.9300 . ?
C6 C7 1.454(6) . ?
C7 N1 1.296(5) . ?
C7 H7 0.9300 . ?
C8 O2 1.445(5) . ?
C8 C9 1.474(5) . ?
C8 H8A 0.9700 . ?
C8 H8B 0.9700 . ?
C9 O3 1.402(4) . ?
C9 H9A 0.9700 . ?
C9 H9B 0.9700 . ?
C10 N2 1.297(5) . ?
C10 C11 1.452(5) . ?
C10 H10 0.9300 . ?
C11 C12 1.373(5) . ?
C11 C16 1.408(5) . ?
C12 C13 1.386(5) . ?
C12 H12 0.9300 . ?
C13 C14 1.420(5) . ?
C13 C27 1.527(6) . ?
C14 C15 1.395(6) . ?
C14 H14 0.9300 . ?
C15 C17 1.466(6) . ?
C15 C16 1.466(5) . ?
C16 O4 1.304(5) . ?
C17 N3 1.278(5) . ?
C17 H17 0.9300 . ?
C18 O5 1.436(5) . ?
C18 C19 1.489(5) . ?
C18 H18A 0.9700 . ?
C18 H18B 0.9700 . ?
C19 O6 1.391(5) . ?
C19 H19A 0.9700 . ?
C19 H19B 0.9700 . ?
C20 N4 1.214(5) . ?
C20 C21 1.482(6) . ?
C20 H20 0.9300 . ?
C21 C22 1.389(6) . ?
C21 C26 1.399(6) . ?
C22 C23 1.384(6) . ?
C22 H22 0.9300 . ?
C23 C24 1.397(6) . ?
C24 C25 1.385(6) . ?
C24 H24 0.9300 . ?
C25 C26 1.395(6) . ?
C26 O7 1.328(5) . ?
C27 C28 1.506(6) . ?
C27 C30 1.526(5) . ?
C27 C29 1.548(6) . ?
C28 H28A 0.9600 . ?
C28 H28B 0.9600 . ?
C28 H28C 0.9600 . ?
C29 H29A 0.9600 . ?
C29 H29B 0.9600 . ?
C29 H29C 0.9600 . ?
C30 H30A 0.9600 . ?
C30 H30B 0.9600 . ?
C30 H30C 0.9600 . ?
C31 O8 1.310(5) . ?
C31 H31A 0.9600 . ?
C31 H31B 0.9600 . ?
C31 H31C 0.9600 . ?
C32 O15 1.267(4) . ?
C32 C37 1.437(5) . ?
C32 C33 1.476(6) . ?
C33 C34 1.412(5) . ?
C34 C35 1.394(5) . ?
C34 H34 0.9300 . ?
C35 C36 1.373(5) . ?
C36 C37 1.391(5) . ?
C36 H36 0.9300 . ?
C37 C38 1.461(5) . ?
C38 N8 1.294(5) . ?
C38 H38 0.9300 . ?
C39 O14 1.395(5) . ?
C39 C40 1.547(5) . ?
C39 H39A 0.9700 . ?
C39 H39B 0.9700 . ?
C40 O13 1.426(4) . ?
C40 H40A 0.9700 . ?
C40 H40B 0.9700 . ?
C41 N7 1.274(5) . ?
C41 C42 1.480(5) . ?
C41 H41 0.9300 . ?
C42 C47 1.378(6) . ?
C42 C43 1.452(6) . ?
C43 C44 1.302(5) . ?
C43 H43 0.9300 . ?
C44 C45 1.387(6) . ?
C44 C58 1.533(5) . ?
C45 C46 1.388(5) . ?
C45 H45 0.9300 . ?
C46 C47 1.462(5) . ?
C46 C48 1.494(6) . ?
C47 O12 1.318(5) . ?
C48 N6 1.254(5) . ?
C48 H48 0.9300 . ?
C49 O11 1.489(5) . ?
C49 C50 1.535(6) . ?
C49 H49A 0.9700 . ?
C49 H49B 0.9700 . ?
C50 O10 1.461(5) . ?
C50 H50A 0.9700 . ?
C50 H50B 0.9700 . ?
C51 N5 1.292(5) . ?
C51 C52 1.452(5) . ?
C51 H51 0.9300 . ?
C52 C57 1.433(6) . ?
C52 C53 1.442(5) . ?
C53 C54 1.365(5) . ?
C53 H53 0.9300 . ?
C54 C55 1.480(6) . ?
C55 C56 1.353(5) . ?
C55 H55 0.9300 . ?
C56 C57 1.400(5) . ?
C57 O9 1.356(5) . ?
C58 C61 1.513(6) . ?
C58 C59 1.552(6) . ?
C58 C60 1.548(6) . ?
C59 H59A 0.9600 . ?
C59 H59B 0.9600 . ?
C59 H59C 0.9600 . ?
C60 H60A 0.9600 . ?
C60 H60B 0.9600 . ?
C60 H60C 0.9600 . ?
C61 H61A 0.9600 . ?
C61 H61B 0.9600 . ?
C61 H61C 0.9600 . ?
C62 O17 1.257(5) . ?
C62 O16 1.321(5) . ?
C62 C63 1.518(6) . ?
C62 Co3 2.486(5) . ?
C63 H63A 0.9600 . ?
C63 H63B 0.9600 . ?
C63 H63C 0.9600 . ?
Co1 O1 1.952(3) . ?
Co1 O8 1.961(3) . ?
Co1 N2 2.033(3) . ?
Co1 N1 2.045(3) . ?
Co1 O4 2.071(3) . ?
Co2 O7 1.954(3) . ?
Co2 O8 1.961(3) . ?
Co2 N3 2.060(3) . ?
Co2 O4 2.069(3) . ?
Co2 N4 2.083(4) . ?
Co3 O12 2.021(3) . ?
Co3 N5 2.047(4) . ?
Co3 N6 2.063(3) . ?
Co3 O9 2.074(3) . ?
Co3 O16 2.138(3) . ?
Co3 O17 2.198(3) . ?
Co4 O15 1.917(3) . ?
Co4 O9 2.022(3) . ?
Co4 N7 2.027(3) . ?
Co4 O12 2.086(3) . ?
Co4 N8 2.139(3) . ?
N1 O2 1.427(4) . ?
N2 O3 1.462(4) . ?
N3 O5 1.454(4) . ?
N4 O6 1.426(4) . ?
N5 O10 1.479(4) . ?
N6 O11 1.443(4) . ?
N7 O13 1.428(4) . ?
N8 O14 1.438(4) . ?
 
loop_
 _geom_angle_atom_site_label_1
 _geom_angle_atom_site_label_2
 _geom_angle_atom_site_label_3
 _geom_angle
 _geom_angle_site_symmetry_1
 _geom_angle_site_symmetry_3
 _geom_angle_publ_flag
O1 C1 C2 117.8(4) . . ?
O1 C1 C6 124.9(4) . . ?
C2 C1 C6 117.2(4) . . ?
C3 C2 C1 120.5(4) . . ?
C3 C2 Br1 119.2(3) . . ?
C1 C2 Br1 120.3(3) . . ?
C4 C3 C2 120.7(4) . . ?
C4 C3 H3 119.7 . . ?
C2 C3 H3 119.7 . . ?
C3 C4 C5 123.5(4) . . ?
C3 C4 Br2 121.3(3) . . ?
C5 C4 Br2 114.8(4) . . ?
C4 C5 C6 118.3(4) . . ?
C4 C5 H5 120.8 . . ?
C6 C5 H5 120.8 . . ?
C5 C6 C1 119.3(4) . . ?
C5 C6 C7 116.8(4) . . ?
C1 C6 C7 123.8(4) . . ?
N1 C7 C6 124.1(4) . . ?
N1 C7 H7 117.9 . . ?
C6 C7 H7 117.9 . . ?
O2 C8 C9 114.0(4) . . ?
O2 C8 H8A 108.8 . . ?
C9 C8 H8A 108.8 . . ?
O2 C8 H8B 108.8 . . ?
C9 C8 H8B 108.8 . . ?
H8A C8 H8B 107.7 . . ?
O3 C9 C8 117.1(3) . . ?
O3 C9 H9A 108.0 . . ?
C8 C9 H9A 108.0 . . ?
O3 C9 H9B 108.0 . . ?
C8 C9 H9B 108.0 . . ?
H9A C9 H9B 107.3 . . ?
N2 C10 C11 126.0(4) . . ?
N2 C10 H10 117.0 . . ?
C11 C10 H10 117.0 . . ?
C12 C11 C16 121.5(4) . . ?
C12 C11 C10 119.5(4) . . ?
C16 C11 C10 119.0(4) . . ?
C11 C12 C13 125.2(4) . . ?
C11 C12 H12 117.4 . . ?
C13 C12 H12 117.4 . . ?
C12 C13 C14 115.1(4) . . ?
C12 C13 C27 124.0(4) . . ?
C14 C13 C27 120.6(3) . . ?
C15 C14 C13 121.6(4) . . ?
C15 C14 H14 119.2 . . ?
C13 C14 H14 119.2 . . ?
C14 C15 C17 118.7(4) . . ?
C14 C15 C16 121.7(4) . . ?
C17 C15 C16 118.9(4) . . ?
O4 C16 C11 122.6(4) . . ?
O4 C16 C15 122.9(4) . . ?
C11 C16 C15 114.5(4) . . ?
N3 C17 C15 125.5(4) . . ?
N3 C17 H17 117.2 . . ?
C15 C17 H17 117.2 . . ?
O5 C18 C19 114.0(3) . . ?
O5 C18 H18A 108.7 . . ?
C19 C18 H18A 108.7 . . ?
O5 C18 H18B 108.7 . . ?
C19 C18 H18B 108.7 . . ?
H18A C18 H18B 107.6 . . ?
O6 C19 C18 117.2(4) . . ?
O6 C19 H19A 108.0 . . ?
C18 C19 H19A 108.0 . . ?
O6 C19 H19B 108.0 . . ?
C18 C19 H19B 108.0 . . ?
H19A C19 H19B 107.2 . . ?
N4 C20 C21 126.4(4) . . ?
N4 C20 H20 116.8 . . ?
C21 C20 H20 116.8 . . ?
C22 C21 C26 120.4(4) . . ?
C22 C21 C20 117.0(4) . . ?
C26 C21 C20 122.6(4) . . ?
C23 C22 C21 120.0(4) . . ?
C23 C22 H22 120.0 . . ?
C21 C22 H22 120.0 . . ?
C22 C23 C24 120.3(5) . . ?
C22 C23 Br3 120.6(3) . . ?
C24 C23 Br3 118.9(4) . . ?
C25 C24 C23 119.4(4) . . ?
C25 C24 H24 120.3 . . ?
C23 C24 H24 120.3 . . ?
C24 C25 C26 121.0(4) . . ?
C24 C25 Br4 116.5(3) . . ?
C26 C25 Br4 122.5(3) . . ?
O7 C26 C25 117.4(4) . . ?
O7 C26 C21 123.6(4) . . ?
C25 C26 C21 118.9(4) . . ?
C28 C27 C13 110.8(3) . . ?
C28 C27 C30 104.1(4) . . ?
C13 C27 C30 115.6(4) . . ?
C28 C27 C29 109.7(4) . . ?
C13 C27 C29 111.1(3) . . ?
C30 C27 C29 105.2(4) . . ?
C27 C28 H28A 109.5 . . ?
C27 C28 H28B 109.5 . . ?
H28A C28 H28B 109.5 . . ?
C27 C28 H28C 109.5 . . ?
H28A C28 H28C 109.5 . . ?
H28B C28 H28C 109.5 . . ?
C27 C29 H29A 109.5 . . ?
C27 C29 H29B 109.5 . . ?
H29A C29 H29B 109.5 . . ?
C27 C29 H29C 109.5 . . ?
H29A C29 H29C 109.5 . . ?
H29B C29 H29C 109.5 . . ?
C27 C30 H30A 109.5 . . ?
C27 C30 H30B 109.5 . . ?
H30A C30 H30B 109.5 . . ?
C27 C30 H30C 109.5 . . ?
H30A C30 H30C 109.5 . . ?
H30B C30 H30C 109.5 . . ?
O8 C31 H31A 109.5 . . ?
O8 C31 H31B 109.5 . . ?
H31A C31 H31B 109.5 . . ?
O8 C31 H31C 109.5 . . ?
H31A C31 H31C 109.5 . . ?
H31B C31 H31C 109.5 . . ?
O15 C32 C37 127.3(4) . . ?
O15 C32 C33 120.2(4) . . ?
C37 C32 C33 112.5(4) . . ?
C34 C33 C32 124.7(4) . . ?
C34 C33 Br5 119.3(3) . . ?
C32 C33 Br5 116.0(3) . . ?
C35 C34 C33 115.9(4) . . ?
C35 C34 H34 122.1 . . ?
C33 C34 H34 122.1 . . ?
C36 C35 C34 124.0(4) . . ?
C36 C35 Br6 118.7(3) . . ?
C34 C35 Br6 117.3(3) . . ?
C35 C36 C37 119.3(4) . . ?
C35 C36 H36 120.4 . . ?
C37 C36 H36 120.4 . . ?
C36 C37 C32 123.7(4) . . ?
C36 C37 C38 115.1(4) . . ?
C32 C37 C38 121.1(4) . . ?
N8 C38 C37 124.3(4) . . ?
N8 C38 H38 117.9 . . ?
C37 C38 H38 117.9 . . ?
O14 C39 C40 111.0(3) . . ?
O14 C39 H39A 109.4 . . ?
C40 C39 H39A 109.4 . . ?
O14 C39 H39B 109.4 . . ?
C40 C39 H39B 109.4 . . ?
H39A C39 H39B 108.0 . . ?
O13 C40 C39 114.0(3) . . ?
O13 C40 H40A 108.8 . . ?
C39 C40 H40A 108.8 . . ?
O13 C40 H40B 108.8 . . ?
C39 C40 H40B 108.8 . . ?
H40A C40 H40B 107.7 . . ?
N7 C41 C42 125.9(4) . . ?
N7 C41 H41 117.1 . . ?
C42 C41 H41 117.1 . . ?
C47 C42 C43 120.1(4) . . ?
C47 C42 C41 121.9(4) . . ?
C43 C42 C41 118.0(4) . . ?
C44 C43 C42 124.0(4) . . ?
C44 C43 H43 118.0 . . ?
C42 C43 H43 118.0 . . ?
C43 C44 C45 118.1(4) . . ?
C43 C44 C58 121.9(4) . . ?
C45 C44 C58 120.0(4) . . ?
C44 C45 C46 121.3(4) . . ?
C44 C45 H45 119.3 . . ?
C46 C45 H45 119.3 . . ?
C45 C46 C47 121.5(4) . . ?
C45 C46 C48 115.5(4) . . ?
C47 C46 C48 122.9(4) . . ?
O12 C47 C42 125.0(4) . . ?
O12 C47 C46 120.1(4) . . ?
C42 C47 C46 114.9(4) . . ?
N6 C48 C46 123.7(4) . . ?
N6 C48 H48 118.1 . . ?
C46 C48 H48 118.1 . . ?
O11 C49 C50 114.5(3) . . ?
O11 C49 H49A 108.6 . . ?
C50 C49 H49A 108.6 . . ?
O11 C49 H49B 108.6 . . ?
C50 C49 H49B 108.6 . . ?
H49A C49 H49B 107.6 . . ?
O10 C50 C49 114.8(3) . . ?
O10 C50 H50A 108.6 . . ?
C49 C50 H50A 108.6 . . ?
O10 C50 H50B 108.6 . . ?
C49 C50 H50B 108.6 . . ?
H50A C50 H50B 107.5 . . ?
N5 C51 C52 120.2(4) . . ?
N5 C51 H51 119.9 . . ?
C52 C51 H51 119.9 . . ?
C57 C52 C53 120.9(4) . . ?
C57 C52 C51 123.7(4) . . ?
C53 C52 C51 115.3(4) . . ?
C54 C53 C52 117.5(4) . . ?
C54 C53 H53 121.3 . . ?
C52 C53 H53 121.3 . . ?
C53 C54 C55 121.9(4) . . ?
C53 C54 Br8 117.9(3) . . ?
C55 C54 Br8 120.1(3) . . ?
C56 C55 C54 118.0(4) . . ?
C56 C55 H55 121.0 . . ?
C54 C55 H55 121.0 . . ?
C55 C56 C57 123.0(4) . . ?
C55 C56 Br7 116.9(3) . . ?
C57 C56 Br7 120.0(3) . . ?
O9 C57 C56 121.0(4) . . ?
O9 C57 C52 121.2(4) . . ?
C56 C57 C52 117.9(4) . . ?
C61 C58 C44 107.9(3) . . ?
C61 C58 C59 115.4(4) . . ?
C44 C58 C59 114.6(3) . . ?
C61 C58 C60 105.7(3) . . ?
C44 C58 C60 105.3(3) . . ?
C59 C58 C60 107.1(3) . . ?
C58 C59 H59A 109.5 . . ?
C58 C59 H59B 109.5 . . ?
H59A C59 H59B 109.5 . . ?
C58 C59 H59C 109.5 . . ?
H59A C59 H59C 109.5 . . ?
H59B C59 H59C 109.5 . . ?
C58 C60 H60A 109.5 . . ?
C58 C60 H60B 109.5 . . ?
H60A C60 H60B 109.5 . . ?
C58 C60 H60C 109.5 . . ?
H60A C60 H60C 109.5 . . ?
H60B C60 H60C 109.5 . . ?
C58 C61 H61A 109.5 . . ?
C58 C61 H61B 109.5 . . ?
H61A C61 H61B 109.5 . . ?
C58 C61 H61C 109.5 . . ?
H61A C61 H61C 109.5 . . ?
H61B C61 H61C 109.5 . . ?
O17 C62 O16 120.9(4) . . ?
O17 C62 C63 125.0(5) . . ?
O16 C62 C63 114.1(4) . . ?
O17 C62 Co3 62.1(2) . . ?
O16 C62 Co3 59.3(2) . . ?
C63 C62 Co3 171.3(3) . . ?
C62 C63 H63A 109.5 . . ?
C62 C63 H63B 109.5 . . ?
H63A C63 H63B 109.5 . . ?
C62 C63 H63C 109.5 . . ?
H63A C63 H63C 109.5 . . ?
H63B C63 H63C 109.5 . . ?
O1 Co1 O8 101.51(11) . . ?
O1 Co1 N2 119.82(13) . . ?
O8 Co1 N2 135.01(13) . . ?
O1 Co1 N1 91.36(13) . . ?
O8 Co1 N1 102.61(13) . . ?
N2 Co1 N1 93.90(14) . . ?
O1 Co1 O4 96.38(11) . . ?
O8 Co1 O4 77.55(11) . . ?
N2 Co1 O4 80.79(12) . . ?
N1 Co1 O4 172.08(12) . . ?
O7 Co2 O8 106.55(11) . . ?
O7 Co2 N3 114.64(12) . . ?
O8 Co2 N3 138.09(13) . . ?
O7 Co2 O4 109.12(11) . . ?
O8 Co2 O4 77.62(11) . . ?
N3 Co2 O4 81.91(12) . . ?
O7 Co2 N4 88.21(13) . . ?
O8 Co2 N4 99.92(13) . . ?
N3 Co2 N4 89.06(13) . . ?
O4 Co2 N4 162.54(13) . . ?
O12 Co3 N5 104.76(12) . . ?
O12 Co3 N6 86.01(12) . . ?
N5 Co3 N6 93.49(13) . . ?
O12 Co3 O9 80.34(10) . . ?
N5 Co3 O9 84.69(12) . . ?
N6 Co3 O9 165.25(12) . . ?
O12 Co3 O16 150.11(11) . . ?
N5 Co3 O16 101.99(12) . . ?
N6 Co3 O16 105.51(12) . . ?
O9 Co3 O16 89.17(10) . . ?
O12 Co3 O17 89.85(11) . . ?
N5 Co3 O17 163.86(12) . . ?
N6 Co3 O17 94.34(12) . . ?
O9 Co3 O17 91.20(11) . . ?
O16 Co3 O17 62.27(11) . . ?
O12 Co3 C62 118.93(14) . . ?
N5 Co3 C62 133.65(15) . . ?
N6 Co3 C62 103.70(13) . . ?
O9 Co3 C62 87.89(12) . . ?
O16 Co3 C62 32.08(13) . . ?
O17 Co3 C62 30.35(13) . . ?
O15 Co4 O9 102.52(12) . . ?
O15 Co4 N7 119.21(12) . . ?
O9 Co4 N7 138.01(13) . . ?
O15 Co4 O12 104.13(11) . . ?
O9 Co4 O12 80.02(10) . . ?
N7 Co4 O12 85.22(12) . . ?
O15 Co4 N8 87.56(13) . . ?
O9 Co4 N8 94.18(12) . . ?
N7 Co4 N8 92.19(13) . . ?
O12 Co4 N8 167.80(12) . . ?
C7 N1 O2 109.3(3) . . ?
C7 N1 Co1 126.7(3) . . ?
O2 N1 Co1 123.9(2) . . ?
C10 N2 O3 107.5(3) . . ?
C10 N2 Co1 125.9(3) . . ?
O3 N2 Co1 120.6(2) . . ?
C17 N3 O5 108.8(3) . . ?
C17 N3 Co2 132.4(3) . . ?
O5 N3 Co2 118.2(2) . . ?
C20 N4 O6 111.1(3) . . ?
C20 N4 Co2 127.8(3) . . ?
O6 N4 Co2 121.0(3) . . ?
C51 N5 O10 107.9(3) . . ?
C51 N5 Co3 131.9(3) . . ?
O10 N5 Co3 119.6(2) . . ?
C48 N6 O11 107.6(3) . . ?
C48 N6 Co3 128.1(3) . . ?
O11 N6 Co3 124.2(2) . . ?
C41 N7 O13 111.2(3) . . ?
C41 N7 Co4 131.0(3) . . ?
O13 N7 Co4 117.5(2) . . ?
C38 N8 O14 109.1(3) . . ?
C38 N8 Co4 125.5(3) . . ?
O14 N8 Co4 125.1(2) . . ?
C1 O1 Co1 127.5(2) . . ?
N1 O2 C8 108.7(3) . . ?
C9 O3 N2 109.0(3) . . ?
C16 O4 Co1 122.5(3) . . ?
C16 O4 Co2 133.6(3) . . ?
Co1 O4 Co2 96.75(12) . . ?
C18 O5 N3 110.6(3) . . ?
C19 O6 N4 110.5(3) . . ?
C26 O7 Co2 131.0(3) . . ?
C31 O8 Co2 126.9(3) . . ?
C31 O8 Co1 123.8(3) . . ?
Co2 O8 Co1 104.20(13) . . ?
C57 O9 Co4 120.5(3) . . ?
C57 O9 Co3 121.4(2) . . ?
Co4 O9 Co3 98.82(11) . . ?
C50 O10 N5 108.4(3) . . ?
N6 O11 C49 112.0(3) . . ?
C47 O12 Co3 128.0(3) . . ?
C47 O12 Co4 130.4(3) . . ?
Co3 O12 Co4 98.44(11) . . ?
N7 O13 C40 110.1(3) . . ?
C39 O14 N8 110.6(3) . . ?
C32 O15 Co4 129.9(3) . . ?
C62 O16 Co3 88.6(3) . . ?
C62 O17 Co3 87.6(3) . . ?
 
loop_
 _geom_torsion_atom_site_label_1
 _geom_torsion_atom_site_label_2
 _geom_torsion_atom_site_label_3
 _geom_torsion_atom_site_label_4
 _geom_torsion
 _geom_torsion_site_symmetry_1
 _geom_torsion_site_symmetry_2
 _geom_torsion_site_symmetry_3
 _geom_torsion_site_symmetry_4
 _geom_torsion_publ_flag
O1 C1 C2 C3 179.7(4) . . . . ?
C6 C1 C2 C3 -3.1(6) . . . . ?
O1 C1 C2 Br1 3.2(5) . . . . ?
C6 C1 C2 Br1 -179.5(3) . . . . ?
C1 C2 C3 C4 5.0(7) . . . . ?
Br1 C2 C3 C4 -178.6(3) . . . . ?
C2 C3 C4 C5 -7.3(7) . . . . ?
C2 C3 C4 Br2 179.9(3) . . . . ?
C3 C4 C5 C6 7.2(7) . . . . ?
Br2 C4 C5 C6 -179.5(3) . . . . ?
C4 C5 C6 C1 -5.1(6) . . . . ?
C4 C5 C6 C7 177.1(4) . . . . ?
O1 C1 C6 C5 -179.8(4) . . . . ?
C2 C1 C6 C5 3.1(6) . . . . ?
O1 C1 C6 C7 -2.2(7) . . . . ?
C2 C1 C6 C7 -179.3(4) . . . . ?
C5 C6 C7 N1 -170.1(4) . . . . ?
C1 C6 C7 N1 12.2(7) . . . . ?
O2 C8 C9 O3 55.7(5) . . . . ?
N2 C10 C11 C12 -169.9(4) . . . . ?
N2 C10 C11 C16 8.4(6) . . . . ?
C16 C11 C12 C13 -4.3(7) . . . . ?
C10 C11 C12 C13 173.9(4) . . . . ?
C11 C12 C13 C14 -1.7(6) . . . . ?
C11 C12 C13 C27 -176.0(4) . . . . ?
C12 C13 C14 C15 5.4(6) . . . . ?
C27 C13 C14 C15 180.0(4) . . . . ?
C13 C14 C15 C17 -173.6(4) . . . . ?
C13 C14 C15 C16 -3.6(6) . . . . ?
C12 C11 C16 O4 -175.7(4) . . . . ?
C10 C11 C16 O4 6.0(6) . . . . ?
C12 C11 C16 C15 6.0(6) . . . . ?
C10 C11 C16 C15 -172.2(4) . . . . ?
C14 C15 C16 O4 179.5(4) . . . . ?
C17 C15 C16 O4 -10.5(6) . . . . ?
C14 C15 C16 C11 -2.2(6) . . . . ?
C17 C15 C16 C11 167.8(4) . . . . ?
C14 C15 C17 N3 -179.3(4) . . . . ?
C16 C15 C17 N3 10.3(7) . . . . ?
O5 C18 C19 O6 59.6(5) . . . . ?
N4 C20 C21 C22 175.9(4) . . . . ?
N4 C20 C21 C26 -7.4(7) . . . . ?
C26 C21 C22 C23 1.8(6) . . . . ?
C20 C21 C22 C23 178.6(4) . . . . ?
C21 C22 C23 C24 -2.6(7) . . . . ?
C21 C22 C23 Br3 173.0(3) . . . . ?
C22 C23 C24 C25 1.5(7) . . . . ?
Br3 C23 C24 C25 -174.1(3) . . . . ?
C23 C24 C25 C26 0.4(6) . . . . ?
C23 C24 C25 Br4 179.5(3) . . . . ?
C24 C25 C26 O7 175.7(3) . . . . ?
Br4 C25 C26 O7 -3.4(5) . . . . ?
C24 C25 C26 C21 -1.1(6) . . . . ?
Br4 C25 C26 C21 179.7(3) . . . . ?
C22 C21 C26 O7 -176.6(4) . . . . ?
C20 C21 C26 O7 6.8(6) . . . . ?
C22 C21 C26 C25 0.0(6) . . . . ?
C20 C21 C26 C25 -176.6(4) . . . . ?
C12 C13 C27 C28 -54.0(6) . . . . ?
C14 C13 C27 C28 132.0(4) . . . . ?
C12 C13 C27 C30 -172.0(4) . . . . ?
C14 C13 C27 C30 14.0(6) . . . . ?
C12 C13 C27 C29 68.2(5) . . . . ?
C14 C13 C27 C29 -105.8(4) . . . . ?
O15 C32 C33 C34 179.9(4) . . . . ?
C37 C32 C33 C34 1.2(6) . . . . ?
O15 C32 C33 Br5 -1.5(5) . . . . ?
C37 C32 C33 Br5 179.8(3) . . . . ?
C32 C33 C34 C35 -1.3(6) . . . . ?
Br5 C33 C34 C35 -179.8(3) . . . . ?
C33 C34 C35 C36 1.7(6) . . . . ?
C33 C34 C35 Br6 -178.0(3) . . . . ?
C34 C35 C36 C37 -2.1(6) . . . . ?
Br6 C35 C36 C37 177.6(3) . . . . ?
C35 C36 C37 C32 2.1(6) . . . . ?
C35 C36 C37 C38 178.5(4) . . . . ?
O15 C32 C37 C36 179.9(4) . . . . ?
C33 C32 C37 C36 -1.5(6) . . . . ?
O15 C32 C37 C38 3.6(6) . . . . ?
C33 C32 C37 C38 -177.8(3) . . . . ?
C36 C37 C38 N8 176.1(4) . . . . ?
C32 C37 C38 N8 -7.3(6) . . . . ?
O14 C39 C40 O13 -59.0(4) . . . . ?
N7 C41 C42 C47 1.8(6) . . . . ?
N7 C41 C42 C43 -176.3(4) . . . . ?
C47 C42 C43 C44 -0.9(7) . . . . ?
C41 C42 C43 C44 177.2(4) . . . . ?
C42 C43 C44 C45 1.4(7) . . . . ?
C42 C43 C44 C58 -176.3(4) . . . . ?
C43 C44 C45 C46 -1.4(6) . . . . ?
C58 C44 C45 C46 176.5(4) . . . . ?
C44 C45 C46 C47 0.8(6) . . . . ?
C44 C45 C46 C48 177.6(4) . . . . ?
C43 C42 C47 O12 177.1(4) . . . . ?
C41 C42 C47 O12 -0.9(6) . . . . ?
C43 C42 C47 C46 0.2(6) . . . . ?
C41 C42 C47 C46 -177.8(4) . . . . ?
C45 C46 C47 O12 -177.3(4) . . . . ?
C48 C46 C47 O12 6.1(6) . . . . ?
C45 C46 C47 C42 -0.2(6) . . . . ?
C48 C46 C47 C42 -176.8(4) . . . . ?
C45 C46 C48 N6 163.9(4) . . . . ?
C47 C46 C48 N6 -19.3(6) . . . . ?
O11 C49 C50 O10 -54.4(5) . . . . ?
N5 C51 C52 C57 21.6(6) . . . . ?
N5 C51 C52 C53 -158.9(4) . . . . ?
C57 C52 C53 C54 -7.7(6) . . . . ?
C51 C52 C53 C54 172.8(4) . . . . ?
C52 C53 C54 C55 1.2(6) . . . . ?
C52 C53 C54 Br8 -176.2(3) . . . . ?
C53 C54 C55 C56 2.3(6) . . . . ?
Br8 C54 C55 C56 179.6(3) . . . . ?
C54 C55 C56 C57 0.9(6) . . . . ?
C54 C55 C56 Br7 -176.7(3) . . . . ?
C55 C56 C57 O9 173.5(4) . . . . ?
Br7 C56 C57 O9 -9.0(5) . . . . ?
C55 C56 C57 C52 -7.2(6) . . . . ?
Br7 C56 C57 C52 170.3(3) . . . . ?
C53 C52 C57 O9 -170.0(4) . . . . ?
C51 C52 C57 O9 9.4(6) . . . . ?
C53 C52 C57 C56 10.7(6) . . . . ?
C51 C52 C57 C56 -169.9(4) . . . . ?
C43 C44 C58 C61 125.5(5) . . . . ?
C45 C44 C58 C61 -52.2(5) . . . . ?
C43 C44 C58 C59 -4.5(6) . . . . ?
C45 C44 C58 C59 177.7(4) . . . . ?
C43 C44 C58 C60 -122.0(4) . . . . ?
C45 C44 C58 C60 60.3(5) . . . . ?
C6 C7 N1 O2 174.9(4) . . . . ?
C6 C7 N1 Co1 -8.9(6) . . . . ?
C11 C10 N2 O3 171.0(4) . . . . ?
C11 C10 N2 Co1 18.5(6) . . . . ?
C15 C17 N3 O5 -178.4(4) . . . . ?
C15 C17 N3 Co2 10.2(7) . . . . ?
C21 C20 N4 O6 -179.7(4) . . . . ?
C21 C20 N4 Co2 4.3(7) . . . . ?
C52 C51 N5 O10 175.0(3) . . . . ?
C52 C51 N5 Co3 -13.6(6) . . . . ?
C46 C48 N6 O11 -179.8(3) . . . . ?
C46 C48 N6 Co3 -2.0(6) . . . . ?
C42 C41 N7 O13 179.0(3) . . . . ?
C42 C41 N7 Co4 -7.9(6) . . . . ?
C37 C38 N8 O14 179.6(3) . . . . ?
C37 C38 N8 Co4 -7.0(6) . . . . ?
C2 C1 O1 Co1 166.8(3) . . . . ?
C6 C1 O1 Co1 -10.2(6) . . . . ?
C7 N1 O2 C8 171.2(3) . . . . ?
Co1 N1 O2 C8 -5.1(4) . . . . ?
C9 C8 O2 N1 -86.3(4) . . . . ?
C8 C9 O3 N2 56.0(4) . . . . ?
C10 N2 O3 C9 133.1(3) . . . . ?
Co1 N2 O3 C9 -72.7(3) . . . . ?
C11 C16 O4 Co1 -45.0(5) . . . . ?
C15 C16 O4 Co1 133.1(3) . . . . ?
C11 C16 O4 Co2 172.1(3) . . . . ?
C15 C16 O4 Co2 -9.8(6) . . . . ?
C19 C18 O5 N3 53.8(4) . . . . ?
C17 N3 O5 C18 107.2(4) . . . . ?
Co2 N3 O5 C18 -80.1(3) . . . . ?
C18 C19 O6 N4 -71.3(4) . . . . ?
C20 N4 O6 C19 153.7(4) . . . . ?
Co2 N4 O6 C19 -30.0(4) . . . . ?
C25 C26 O7 Co2 179.7(3) . . . . ?
C21 C26 O7 Co2 -3.6(6) . . . . ?
C56 C57 O9 Co4 -101.2(4) . . . . ?
C52 C57 O9 Co4 79.5(4) . . . . ?
C56 C57 O9 Co3 134.3(3) . . . . ?
C52 C57 O9 Co3 -45.1(5) . . . . ?
C49 C50 O10 N5 -55.8(4) . . . . ?
C51 N5 O10 C50 -105.2(4) . . . . ?
Co3 N5 O10 C50 82.3(3) . . . . ?
C48 N6 O11 C49 -169.7(3) . . . . ?
Co3 N6 O11 C49 12.4(4) . . . . ?
C50 C49 O11 N6 79.1(4) . . . . ?
C42 C47 O12 Co3 -149.1(3) . . . . ?
C46 C47 O12 Co3 27.6(5) . . . . ?
C42 C47 O12 Co4 6.0(6) . . . . ?
C46 C47 O12 Co4 -177.2(3) . . . . ?
C41 N7 O13 C40 -100.0(4) . . . . ?
Co4 N7 O13 C40 85.8(3) . . . . ?
C39 C40 O13 N7 -58.2(4) . . . . ?
C40 C39 O14 N8 83.5(4) . . . . ?
C38 N8 O14 C39 178.8(3) . . . . ?
Co4 N8 O14 C39 5.4(4) . . . . ?
C37 C32 O15 Co4 16.9(6) . . . . ?
C33 C32 O15 Co4 -161.6(3) . . . . ?
O17 C62 O16 Co3 -8.0(4) . . . . ?
C63 C62 O16 Co3 173.6(3) . . . . ?
O16 C62 O17 Co3 7.8(4) . . . . ?
C63 C62 O17 Co3 -174.0(4) . . . . ?
 
_refine_diff_density_max    1.677
_refine_diff_density_min   -0.861
_refine_diff_density_rms    0.077

_shelx_res_file
;
TITL 20171225LZW123_0m_a.res in P-1
    x_sq.res
    created by SHELXL-2016/6 at 11:46:03 on 12-Jan-2018
CELL  0.71073  15.2444  18.6739  21.3561  109.512   97.335  109.429
ZERR   2.000   0.0024   0.0028   0.0031    0.004    0.004    0.004
LATT 1
SFAC C  H  Br Co N  O
UNIT 126 120 16 8 16 34
OMIT  -1.00  54.00
L.S. 15 0   94
ACTA
BOND $H
FMAP 2
PLAN 2
conf
delu 0.002 C62 C63
size 0.22 0.18 0.16
omit    1   1   0
omit   -5   2   0
omit   -1   2   0
omit    1   0   2
omit   -3   2   2
omit   -2   1   4
TEMP 18
ABIN
WGHT    0.040000    1.550000
FVAR       0.10964
BR1   3    0.625351    0.319041    0.191439    11.00000    0.04109    0.04969 =
         0.04400    0.01409    0.01290    0.01668
BR2   3    0.466623   -0.012785    0.165491    11.00000    0.05563    0.04541 =
         0.04981    0.01249    0.01434    0.01947
BR3   3    0.119362    0.501800   -0.157090    11.00000    0.04828    0.06368 =
         0.04456    0.01887    0.01256    0.02104
BR4   3    0.152007    0.582120    0.124902    11.00000    0.04361    0.05018 =
         0.04453    0.01727    0.01211    0.01796
BR5   3    0.506664    0.636795    0.593994    11.00000    0.03549    0.04394 =
         0.04170    0.01513    0.01130    0.01417
BR6   3    0.217578    0.464459    0.696465    11.00000    0.03850    0.04839 =
         0.04582    0.01960    0.01409    0.01565
BR7   3    0.032948    0.708963    0.477234    11.00000    0.03629    0.04371 =
         0.04715    0.01288    0.01047    0.01295
BR8   3    0.118814    0.703423    0.741546    11.00000    0.04177    0.04722 =
         0.04543    0.01397    0.01585    0.01176
C1    1    0.443379    0.246243    0.215319    11.00000    0.04124    0.04404 =
         0.04041    0.01557    0.01330    0.01748
C2    1    0.524631    0.233248    0.195410    11.00000    0.04127    0.04392 =
         0.04108    0.01075    0.00944    0.01627
C3    1    0.531337    0.158652    0.182701    11.00000    0.04428    0.04448 =
         0.04653    0.01397    0.01594    0.01764
AFIX  43
H3    2    0.586844    0.152307    0.173268    11.00000   -1.20000
AFIX   0
C4    1    0.458601    0.094531    0.183710    11.00000    0.04817    0.06274 =
         0.03771    0.01159    0.00942    0.02612
C5    1    0.380217    0.100682    0.203951    11.00000    0.05067    0.04270 =
         0.04038    0.01405    0.01326    0.01598
AFIX  43
H5    2    0.334926    0.056494    0.208814    11.00000   -1.20000
AFIX   0
C6    1    0.368414    0.177174    0.217813    11.00000    0.04532    0.04655 =
         0.04575    0.01659    0.00881    0.01814
C7    1    0.280731    0.180136    0.236293    11.00000    0.03767    0.04286 =
         0.04599   -0.00892   -0.00613    0.01199
AFIX  43
H7    2    0.242033    0.136419    0.245298    11.00000   -1.20000
AFIX   0
C8    1    0.137184    0.291442    0.269767    11.00000    0.03834    0.03997 =
         0.05084    0.01463    0.01459    0.01166
AFIX  23
H8A   2    0.067539    0.273044    0.256572    11.00000   -1.20000
H8B   2    0.163173    0.320986    0.242148    11.00000   -1.20000
AFIX   0
C9    1    0.174792    0.349232    0.343055    11.00000    0.03697    0.04762 =
         0.04581    0.01848    0.01313    0.01245
AFIX  23
H9A   2    0.157976    0.396249    0.348235    11.00000   -1.20000
H9B   2    0.141435    0.321457    0.369523    11.00000   -1.20000
AFIX   0
C10   1    0.392836    0.490426    0.374998    11.00000    0.03711    0.04699 =
         0.04199    0.01563    0.01142    0.01846
AFIX  43
H10   2    0.391232    0.507725    0.420877    11.00000   -1.20000
AFIX   0
C11   1    0.469660    0.545348    0.358100    11.00000    0.03548    0.04333 =
         0.03850    0.01456    0.01170    0.01572
C12   1    0.543655    0.612122    0.410293    11.00000    0.04171    0.04436 =
         0.04276    0.01704    0.01409    0.01940
AFIX  43
H12   2    0.538612    0.622917    0.455164    11.00000   -1.20000
AFIX   0
C13   1    0.625297    0.664733    0.401410    11.00000    0.03716    0.04210 =
         0.03712    0.01430    0.01154    0.01205
C14   1    0.630692    0.644193    0.332132    11.00000    0.03911    0.04175 =
         0.04410    0.01674    0.01315    0.01398
AFIX  43
H14   2    0.686209    0.674250    0.323177    11.00000   -1.20000
AFIX   0
C15   1    0.554660    0.579971    0.277164    11.00000    0.04023    0.04344 =
         0.04496    0.01767    0.01270    0.01653
C16   1    0.467720    0.527398    0.288300    11.00000    0.03964    0.04390 =
         0.04189    0.01214    0.00907    0.01872
C17   1    0.568802    0.556297    0.207728    11.00000    0.03732    0.04948 =
         0.04500    0.02455    0.01451    0.01666
AFIX  43
H17   2    0.628890    0.585080    0.203331    11.00000   -1.20000
AFIX   0
C18   1    0.566449    0.419512    0.072435    11.00000    0.03988    0.05692 =
         0.04034    0.01490    0.01337    0.01784
AFIX  23
H18A  2    0.617180    0.424708    0.108210    11.00000   -1.20000
H18B  2    0.589829    0.414865    0.031694    11.00000   -1.20000
AFIX   0
C19   1    0.480450    0.342070    0.056068    11.00000    0.04503    0.04230 =
         0.04521    0.01506    0.01347    0.01564
AFIX  23
H19A  2    0.500190    0.296040    0.042778    11.00000   -1.20000
H19B  2    0.460610    0.345723    0.098019    11.00000   -1.20000
AFIX   0
C20   1    0.311009    0.385363   -0.019822    11.00000    0.04346    0.05182 =
         0.04078    0.01494    0.01856    0.01712
AFIX  43
H20   2    0.312698    0.354627   -0.063700    11.00000   -1.20000
AFIX   0
C21   1    0.255452    0.437803   -0.015270    11.00000    0.04077    0.04853 =
         0.04221    0.01933    0.01224    0.01370
C22   1    0.216219    0.440658   -0.076342    11.00000    0.04131    0.05566 =
         0.04157    0.01914   -0.00452    0.01244
AFIX  43
H22   2    0.226569    0.411419   -0.117407    11.00000   -1.20000
AFIX   0
C23   1    0.161720    0.487026   -0.076074    11.00000    0.04054    0.06273 =
         0.04389    0.00318    0.01233    0.02156
C24   1    0.142567    0.528365   -0.015108    11.00000    0.03884    0.04753 =
         0.04031    0.01626    0.00705    0.01272
AFIX  43
H24   2    0.104675    0.558433   -0.015147    11.00000   -1.20000
AFIX   0
C25   1    0.180548    0.524138    0.045381    11.00000    0.03929    0.05349 =
         0.04477    0.01994    0.01478    0.01469
C26   1    0.237979    0.479666    0.046377    11.00000    0.03679    0.04350 =
         0.03892    0.01590    0.01097    0.00893
C27   1    0.709448    0.735243    0.460756    11.00000    0.04286    0.03808 =
         0.04541    0.01071    0.01367    0.01304
C28   1    0.674279    0.791907    0.509335    11.00000    0.04569    0.05509 =
         0.05740    0.01187    0.01371    0.01570
AFIX 137
H28A  2    0.676083    0.836094    0.495384    11.00000   -1.50000
H28B  2    0.715130    0.814694    0.555317    11.00000   -1.50000
H28C  2    0.609214    0.761042    0.508262    11.00000   -1.50000
AFIX   0
C29   1    0.764945    0.701117    0.500942    11.00000    0.05185    0.04685 =
         0.05482    0.00561   -0.01905    0.01692
AFIX 137
H29A  2    0.795503    0.741333    0.547562    11.00000   -1.50000
H29B  2    0.813145    0.690170    0.479168    11.00000   -1.50000
H29C  2    0.720598    0.650686    0.501015    11.00000   -1.50000
AFIX   0
C30   1    0.785859    0.793090    0.440161    11.00000    0.05472    0.05972 =
         0.04702    0.00986    0.01196   -0.02073
AFIX 137
H30A  2    0.786117    0.847647    0.458438    11.00000   -1.50000
H30B  2    0.771339    0.772557    0.390790    11.00000   -1.50000
H30C  2    0.848196    0.795460    0.458299    11.00000   -1.50000
AFIX   0
C31   1    0.222919    0.259354    0.093086    11.00000    0.04897    0.04314 =
         0.04263    0.01288    0.01120    0.01171
AFIX 137
H31A  2    0.200632    0.265679    0.051933    11.00000   -1.50000
H31B  2    0.168460    0.231848    0.106960    11.00000   -1.50000
H31C  2    0.260828    0.226890    0.084251    11.00000   -1.50000
AFIX   0
C32   1    0.304463    0.574061    0.530238    11.00000    0.04060    0.04130 =
         0.03605    0.01086    0.01315    0.01513
C33   1    0.375461    0.580990    0.588206    11.00000    0.03341    0.04182 =
         0.04101    0.01318    0.01159    0.01424
C34   1    0.351661    0.547736    0.637195    11.00000    0.03750    0.04217 =
         0.04073    0.01365    0.01382    0.01536
AFIX  43
H34   2    0.398666    0.552506    0.672511    11.00000   -1.20000
AFIX   0
C35   1    0.253320    0.507298    0.629356    11.00000    0.03895    0.03964 =
         0.04579    0.01869    0.01352    0.01751
C36   1    0.181641    0.496995    0.576988    11.00000    0.03734    0.04064 =
         0.03888    0.01299    0.01213    0.01567
AFIX  43
H36   2    0.117154    0.467869    0.573355    11.00000   -1.20000
AFIX   0
C37   1    0.206555    0.530595    0.529454    11.00000    0.03569    0.03727 =
         0.03692    0.01032    0.01156    0.01089
C38   1    0.125386    0.514513    0.474768    11.00000    0.03760    0.04292 =
         0.03758    0.01632    0.01280    0.01543
AFIX  43
H38   2    0.063932    0.480683    0.473427    11.00000   -1.20000
AFIX   0
C39   1    0.045252    0.547546    0.332369    11.00000    0.03881    0.04281 =
         0.04395    0.02216    0.01319    0.01401
AFIX  23
H39A  2    0.093272    0.604217    0.352585    11.00000   -1.20000
H39B  2   -0.016505    0.548278    0.315561    11.00000   -1.20000
AFIX   0
C40   1    0.072891    0.495149    0.271375    11.00000    0.03475    0.04344 =
         0.03959    0.01820    0.00853    0.00873
AFIX  23
H40A  2    0.022512    0.439497    0.249829    11.00000   -1.20000
H40B  2    0.075680    0.519013    0.237327    11.00000   -1.20000
AFIX   0
C41   1    0.285507    0.588304    0.280803    11.00000    0.03507    0.04165 =
         0.04212    0.01465    0.01039    0.01469
AFIX  43
H41   2    0.266401    0.547497    0.236363    11.00000   -1.20000
AFIX   0
C42   1    0.367502    0.667271    0.296240    11.00000    0.04101    0.03962 =
         0.03859    0.01413   -0.00323    0.01737
C43   1    0.408180    0.677362    0.240329    11.00000    0.04648    0.04850 =
         0.04287    0.01444    0.01592    0.02262
AFIX  43
H43   2    0.382983    0.632887    0.197484    11.00000   -1.20000
AFIX   0
C44   1    0.477753    0.744829    0.246472    11.00000    0.03381    0.04047 =
         0.04346    0.01852    0.01290    0.00647
C45   1    0.516989    0.810618    0.310695    11.00000    0.04181    0.04177 =
         0.04387    0.01325    0.01702    0.01546
AFIX  43
H45   2    0.567679    0.858891    0.316302    11.00000   -1.20000
AFIX   0
C46   1    0.482103    0.805834    0.366754    11.00000    0.03600    0.04312 =
         0.04675    0.01780    0.01361    0.01658
C47   1    0.403345    0.731017    0.360895    11.00000    0.03703    0.04219 =
         0.04628    0.01620    0.01322    0.01556
C48   1    0.533772    0.879912    0.433373    11.00000    0.03372    0.04265 =
         0.04179    0.01659    0.01008    0.01190
AFIX  43
H48   2    0.594216    0.917616    0.436965    11.00000   -1.20000
AFIX   0
C49   1    0.545987    0.985878    0.606030    11.00000    0.04418    0.03937 =
         0.04658    0.01145    0.01075    0.01168
AFIX  23
H49A  2    0.477120    0.971762    0.598055    11.00000   -1.20000
H49B  2    0.578966    1.044594    0.635299    11.00000   -1.20000
AFIX   0
C50   1    0.573031    0.936823    0.644605    11.00000    0.03825    0.04048 =
         0.04348    0.01374   -0.00946    0.00896
AFIX  23
H50A  2    0.642858    0.957310    0.658995    11.00000   -1.20000
H50B  2    0.550587    0.947600    0.685935    11.00000   -1.20000
AFIX   0
C51   1    0.389526    0.779165    0.617239    11.00000    0.03729    0.04655 =
         0.03922    0.01333    0.01188    0.01428
AFIX  43
H51   2    0.428598    0.771746    0.649584    11.00000   -1.20000
AFIX   0
C52   1    0.285933    0.748428    0.608425    11.00000    0.03963    0.03976 =
         0.04323    0.01386    0.01315    0.01674
C53   1    0.254803    0.734788    0.666017    11.00000    0.04106    0.04368 =
         0.04394    0.01157    0.01470    0.01418
AFIX  43
H53   2    0.298105    0.739382    0.703482    11.00000   -1.20000
AFIX   0
C54   1    0.159356    0.714878    0.663446    11.00000    0.04101    0.04035 =
         0.04117    0.01564    0.01731    0.00815
C55   1    0.089190    0.705807    0.603624    11.00000    0.03679    0.04305 =
         0.04323    0.00943    0.01129    0.00977
AFIX  43
H55   2    0.024838    0.694161    0.603280    11.00000   -1.20000
AFIX   0
C56   1    0.121447    0.714958    0.549462    11.00000    0.03524    0.03535 =
         0.04035    0.00753    0.00900    0.01009
C57   1    0.217286    0.731426    0.547267    11.00000    0.03388    0.03943 =
         0.04232   -0.00704   -0.00398    0.01015
C58   1    0.514025    0.753962    0.184677    11.00000    0.04752    0.05239 =
         0.04200    0.01941    0.01559    0.01741
C59   1    0.466865    0.674610    0.116704    11.00000    0.05747    0.05091 =
         0.04250    0.01769    0.01856    0.01585
AFIX 137
H59A  2    0.482523    0.631133    0.122604    11.00000   -1.50000
H59B  2    0.490849    0.686155    0.080172    11.00000   -1.50000
H59C  2    0.398045    0.657448    0.105281    11.00000   -1.50000
AFIX   0
C60   1    0.622973    0.772699    0.205006    11.00000    0.04868    0.04659 =
         0.04745    0.01239    0.01872    0.01026
AFIX 137
H60A  2    0.648865    0.803857    0.253924    11.00000   -1.50000
H60B  2    0.656177    0.804351    0.181500    11.00000   -1.50000
H60C  2    0.631430    0.721508    0.192198    11.00000   -1.50000
AFIX   0
C61   1    0.508781    0.831536    0.179946    11.00000    0.05289    0.04905 =
         0.04433    0.01574    0.01715    0.01855
AFIX 137
H61A  2    0.452794    0.837700    0.192832    11.00000   -1.50000
H61B  2    0.504486    0.827202    0.133485    11.00000   -1.50000
H61C  2    0.565735    0.878942    0.210518    11.00000   -1.50000
AFIX   0
C62   1    0.264917    0.897801    0.469809    11.00000    0.03796    0.03952 =
         0.06069    0.02021    0.01409   -0.00008
C63   1    0.195735    0.939414    0.464310    11.00000    0.04372    0.04824 =
         0.05503    0.01439    0.01597    0.01311
AFIX 137
H63A  2    0.195108    0.951567    0.424023    11.00000   -1.50000
H63B  2    0.216384    0.990014    0.504575    11.00000   -1.50000
H63C  2    0.131962    0.902976    0.460853    11.00000   -1.50000
AFIX   0
CO1   4    0.331056    0.350328    0.237159    11.00000    0.03864    0.04290 =
         0.04282    0.01480    0.01244    0.01492
CO2   4    0.359911    0.431017    0.132018    11.00000    0.03773    0.04608 =
         0.04033    0.01535    0.01162    0.01459
CO3   4    0.368104    0.825943    0.493274    11.00000    0.03649    0.04067 =
         0.04223    0.01349    0.01071    0.01253
CO4   4    0.262936    0.633573    0.425613    11.00000    0.03579    0.04002 =
         0.04135    0.01445    0.01125    0.01322
N1    5    0.253141    0.239855    0.240999    11.00000    0.04069    0.04504 =
         0.04562    0.01453    0.01487    0.01336
N2    5    0.326263    0.419492    0.332036    11.00000    0.03459    0.04211 =
         0.04351    0.01315    0.01058    0.01425
N3    5    0.505557    0.499444    0.152692    11.00000    0.03914    0.04098 =
         0.03882    0.01309    0.01352    0.01227
N4    5    0.354541    0.378590    0.028123    11.00000    0.03764    0.04523 =
         0.03839    0.01084    0.00816    0.01126
N5    5    0.427605    0.816785    0.580302    11.00000    0.03827    0.04000 =
         0.04565    0.01622    0.01637    0.01478
N6    5    0.500265    0.894131    0.484713    11.00000    0.03862    0.04070 =
         0.04108    0.01392    0.00867    0.01371
N7    5    0.238726    0.571168    0.322883    11.00000    0.03531    0.03949 =
         0.03765    0.01364    0.01022    0.01473
N8    5    0.133452    0.544283    0.428076    11.00000    0.03484    0.04104 =
         0.04252    0.01055    0.01261    0.01206
O1    6    0.440999    0.320087    0.227334    11.00000    0.03887    0.04587 =
         0.04153    0.01257    0.01098    0.01657
O2    6    0.160348    0.219492    0.254066    11.00000    0.04258    0.04766 =
         0.04671    0.01575    0.01693    0.01384
O3    6    0.274366    0.379716    0.372496    11.00000    0.03865    0.04361 =
         0.04682    0.01514    0.01543    0.01507
O4    6    0.395400    0.467411    0.237842    11.00000    0.03551    0.04412 =
         0.04076    0.01414    0.01070    0.01364
O5    6    0.548196    0.493439    0.094997    11.00000    0.04248    0.04750 =
         0.04052    0.01372    0.01478    0.01493
O6    6    0.400197    0.323078    0.004662    11.00000    0.04247    0.04503 =
         0.04556    0.01127    0.01361    0.01203
O7    6    0.276867    0.483022    0.107153    11.00000    0.03848    0.04299 =
         0.03903    0.01325    0.00999    0.01300
O8    6    0.275929    0.332576    0.142381    11.00000    0.03835    0.04433 =
         0.04219    0.01372    0.01152    0.01037
O9    6    0.244337    0.732066    0.489300    11.00000    0.03461    0.04244 =
         0.04410    0.01027    0.01041    0.01288
O10   6    0.533715    0.847210    0.604816    11.00000    0.03735    0.04332 =
         0.04455    0.01486    0.01367    0.01470
O11   6    0.570171    0.970804    0.538703    11.00000    0.03895    0.04296 =
         0.04245    0.01409    0.01026    0.01063
O12   6    0.369202    0.729544    0.414319    11.00000    0.03547    0.04056 =
         0.03816    0.01149    0.00869    0.01296
O13   6    0.162934    0.490015    0.290631    11.00000    0.03500    0.04522 =
         0.03975    0.01077    0.00888    0.01291
O14   6    0.039374    0.515211    0.382645    11.00000    0.03094    0.04329 =
         0.04545    0.01161    0.00806    0.01118
O15   6    0.332682    0.606092    0.488818    11.00000    0.03381    0.03701 =
         0.04105    0.01401    0.01021    0.01067
O16   6    0.306553    0.913291    0.533757    11.00000    0.04047    0.04126 =
         0.04518    0.01205    0.00999    0.01242
O17   6    0.284821    0.853726    0.419571    11.00000    0.03835    0.04183 =
         0.04361    0.01217   -0.00497    0.01426
HKLF 4


REM  20171225LZW123_0m_a.res in P-1
REM R1 =  0.0438 for   13952 Fo > 4sig(Fo)  and  0.0762 for all   22025 data
REM    909 parameters refined using      1 restraints

END

WGHT      0.0532      0.0000

REM Highest difference peak  1.677,  deepest hole -0.861,  1-sigma level  0.077
Q1    1   0.0739  0.4348 -0.1781  11.00000  0.05    1.68
Q2    1   0.1519  0.5695 -0.1344  11.00000  0.05    1.18
;
_shelx_res_checksum   16033

_shelx_hkl_file
;
   1   0   0 1930.03    0.13
  -1   1   0  358.84    0.14
   0   1   0 4151.11    0.11
   0  -1   1  156.77    0.12
   1  -1   1  330.19    0.16
  -1   0   1  121.21    0.14
   0   0   1 1081.37    0.10
   1   0   1   57.89    0.18
  -1   1   1  480.43    0.17
   0   1   1  714.87    0.18
   0  -1   2  193.81    0.18
  -2   0   0    4.12    0.29
   2   0   0    4.25    0.28
  -3   0   0  298.38    4.62
  -3   0   0  303.25    4.72
   3   0   0  299.78    4.62
  -4   0   0   12.01    0.66
   4   0   0   12.01    0.73
  -5   0   0   53.41    1.19
  -5   0   0   53.39    0.95
   5   0   0   53.09    1.26
   5   0   0   54.78    0.97
  -6   0   0  119.17    3.65
   6   0   0  123.78    4.00
  -7   0   0   42.91    1.34
  -8   0   0  569.68   13.77
  -9   0   0   11.05    1.50
  -9   0   0   12.32    1.40
 -10   0   0   59.72    2.11
 -10   0   0   59.18    2.64
 -10   0   0   59.15    2.11
 -11   0   0    0.61    1.11
 -11   0   0   -0.38    2.03
 -11   0   0    0.51    1.19
 -12   0   0  105.30    2.62
 -12   0   0  104.31    2.56
 -13   0   0    8.96    1.84
 -13   0   0    8.91    1.84
 -14   0   0    1.36    1.80
 -15   0   0    7.56    2.00
 -16   0   0    0.66    2.13
 -17   0   0    8.13    2.58
 -18   1   0    1.87    2.61
 -17   1   0    0.00    2.14
 -16   1   0    1.32    2.04
 -15   1   0   20.69    1.98
 -15   1   0   20.42    1.91
 -14   1   0   22.69    1.82
 -14   1   0   21.55    1.74
 -13   1   0   33.75    1.80
 -13   1   0   33.52    1.61
 -12   1   0   11.73    1.33
 -12   1   0   10.79    1.40
 -11   1   0    0.36    1.14
 -11   1   0    1.10    1.05
 -10   1   0   15.45    1.25
  -9   1   0   98.60    2.96
  -8   1   0  550.50   13.01
  -7   1   0  221.98    8.90
  -6   1   0   87.34    3.86
   5  -1   0    3.14    0.48
  -5   1   0    3.30    0.53
  -5   1   0    3.96    0.84
   4  -1   0   43.60    0.69
  -4   1   0   42.91    0.73
   3  -1   0  107.56    1.03
  -3   1   0  107.42    1.05
   2  -1   0  153.89    3.37
  -2   1   0  153.85    3.37
   1   1   0   48.04    1.67
  -2  -1   0  974.24   19.05
  -2  -1   0  961.58   18.99
   2   1   0  968.62   19.05
   2   1   0  966.37   18.99
  -3  -1   0  269.47    4.00
   3   1   0  270.10    4.03
  -4  -1   0  360.34    7.26
  -4  -1   0  356.89    7.37
   4   1   0  359.93    7.42
   4   1   0  365.13    7.26
  -5  -1   0    4.34    0.49
  -5  -1   0    3.82    0.54
   5   1   0    4.23    1.03
  -6  -1   0    0.31    0.57
   6   1   0   -0.06    1.12
  -7  -1   0   52.72    1.28
   7   1   0   52.90    1.71
  -8  -1   0    7.97    0.83
   8   1   0    8.21    1.47
  -9  -1   0   94.90    3.40
 -10  -1   0    6.34    1.37
 -11  -1   0  135.52    3.57
 -12  -1   0   16.22    1.67
 -13  -1   0    3.26    1.52
 -14  -1   0    2.09    1.71
 -15  -1   0    1.55    1.93
 -16  -1   0    1.17    2.05
 -17  -1   0   10.05    2.65
 -18   2   0   -0.26    2.43
 -17   2   0    2.61    2.56
 -17   2   0    4.14    2.36
 -16   2   0    0.54    2.09
 -16   2   0    1.11    1.95
 -15   2   0    0.81    1.84
 -15   2   0    1.64    1.64
 -14   2   0   15.81    1.88
 -14   2   0   16.72    2.18
 -13   2   0   14.66    1.74
 -13   2   0   13.33    1.57
 -12   2   0    1.58    1.36
 -12   2   0    1.88    1.26
 -11   2   0    1.08    1.05
 -10   2   0    6.30    0.92
  -9   2   0  215.68    5.79
  -8   2   0   16.69    1.16
  -7   2   0   14.17    1.11
  -6   2   0   21.12    1.48
   5  -2   0   10.78    1.27
  -5   2   0   12.30    1.32
  -5   2   0   12.35    1.55
   4  -2   0   12.78    1.25
  -4   2   0   11.58    1.26
   3  -2   0  158.37    3.35
  -3   2   0  156.39    3.36
   2  -2   0  232.07    4.60
  -2   2   0  233.06    4.61
   1  -2   0   18.20    0.39
  -1   2   0   17.58    0.30
   0  -2   0   28.76    1.20
   0   2   0   28.73    1.17
  -1  -2   0   17.67    0.94
  -1  -2   0   18.60    0.88
   1   2   0   18.78    0.85
  -2  -2   0  482.99   13.65
  -2  -2   0  470.56   13.59
   2   2   0  476.92   13.58
   2   2   0  485.38   13.67
  -3  -2   0  808.52   19.08
  -3  -2   0  806.46   19.01
   3   2   0  803.87   18.99
   3   2   0  807.19   19.10
  -4  -2   0   25.70    1.43
  -4  -2   0   25.61    1.13
   4   2   0   25.13    1.05
   4   2   0   26.03    1.54
  -5  -2   0    4.83    0.57
   5   2   0    5.27    1.09
  -6  -2   0   17.98    0.92
   6   2   0   19.00    1.61
  -7  -2   0   70.17    2.08
  -8  -2   0  320.44    8.69
   8   2   0  324.35    9.10
  -9  -2   0    1.81    0.99
   9   2   0    2.82    1.85
 -10  -2   0    7.68    1.22
 -11  -2   0   -0.16    1.25
 -12  -2   0    0.30    1.41
 -13  -2   0    7.83    1.75
 -14  -2   0    3.74    1.91
 -15  -2   0   23.11    2.29
 -16  -2   0    7.35    2.32
 -18   3   0   -0.58    2.35
 -17   3   0    8.74    2.58
 -17   3   0    9.50    2.42
 -16   3   0    4.47    1.74
 -16   3   0    3.00    2.16
 -15   3   0    0.39    1.67
 -15   3   0    0.94    2.00
 -14   3   0   27.27    1.71
 -14   3   0   28.74    2.06
 -13   3   0   19.32    2.34
 -12   3   0   51.59    2.43
 -11   3   0   66.55    2.25
 -10   3   0   11.48    1.60
  -9   3   0    1.05    0.77
  -8   3   0   64.35    1.85
  -7   3   0    5.91    0.75
  -6   3   0  298.42    9.98
   5  -3   0   14.69    0.89
  -5   3   0   13.45    0.93
   4  -3   0   41.44    0.96
  -4   3   0   41.08    0.97
   3  -3   0  829.70   27.62
  -3   3   0  806.24   27.63
  -2   3   0    7.20    0.33
   1  -3   0   76.13    0.65
  -1   3   0   76.85    0.61
   0  -3   0   55.03    4.40
   0   3   0   51.02    4.37
  -1  -3   0  220.07    1.79
  -2  -3   0  627.25   18.28
   2   3   0  607.59   18.20
   2   3   0  631.11   18.29
  -3  -3   0   12.71    1.02
   3   3   0   11.74    0.93
  -4  -3   0    2.79    0.53
  -4  -3   0    2.95    0.83
   4   3   0    3.25    0.93
  -5  -3   0   92.02    3.36
   5   3   0   94.73    3.75
  -6  -3   0   52.64    1.75
   6   3   0   52.08    2.32
  -7  -3   0   13.06    1.27
   7   3   0   15.27    2.00
  -8  -3   0   90.12    2.74
   8   3   0   90.17    3.50
  -9  -3   0   28.48    1.47
   9   3   0   28.77    2.26
 -10  -3   0   18.49    1.33
  10   3   0   19.82    2.33
 -11  -3   0   25.01    1.75
 -12  -3   0    0.40    1.55
 -13  -3   0    7.72    2.06
 -14  -3   0    8.70    1.96
 -15  -3   0    0.21    2.31
 -16  -3   0    8.16    2.68
 -18   4   0   -0.29    2.30
 -18   4   0    2.91    2.65
 -17   4   0   23.89    2.44
 -17   4   0   24.70    2.83
 -16   4   0    2.29    1.83
 -16   4   0    1.78    2.06
 -15   4   0    7.89    1.89
 -15   4   0    7.61    1.63
 -14   4   0   24.95    1.87
 -13   4   0    9.56    1.24
 -12   4   0  218.79    6.15
 -11   4   0  162.75    4.23
 -10   4   0    2.64    0.89
  -9   4   0   34.05    1.51
  -8   4   0   29.81    0.77
  -7   4   0  122.20    4.62
  -6   4   0  623.26   18.36
   5  -4   0   22.45    0.76
  -5   4   0   22.74    0.79
   4  -4   0   66.06    2.34
  -4   4   0   66.60    2.35
   3  -4   0  431.30   12.19
  -3   4   0  437.28   12.20
   2  -4   0    4.01    0.44
  -2   4   0    3.94    0.44
   1  -4   0  172.22    5.60
  -1   4   0  173.84    5.60
   0  -4   0  339.46    9.26
   0   4   0  335.19    9.21
  -1  -4   0  976.33   25.52
  -1  -4   0  997.76   25.51
   1   4   0  986.36   25.51
   1   4   0  985.30   25.48
   1   4   0  982.85   25.46
  -2  -4   0   53.82    1.60
  -2  -4   0   54.82    1.68
   2   4   0   53.40    1.77
   2   4   0   55.71    1.51
  -3  -4   0  323.34    7.29
  -3  -4   0  320.21    7.38
   3   4   0  324.33    7.44
   3   4   0  321.18    7.25
  -4  -4   0   10.41    1.18
  -5  -4   0  131.31    3.84
   5   4   0  132.88    4.15
  -6  -4   0    0.34    0.91
   6   4   0    1.44    1.49
  -7  -4   0    2.16    0.87
   7   4   0    1.98    1.53
  -8  -4   0   23.57    1.23
   8   4   0   23.04    2.10
  -9  -4   0  128.49    2.57
   9   4   0  133.37    3.67
 -10  -4   0    4.03    1.38
  10   4   0    4.92    2.37
 -11  -4   0   19.72    1.48
  11   4   0   19.56    2.66
 -12  -4   0   18.60    1.79
 -13  -4   0    1.16    1.95
 -14  -4   0    6.98    2.19
 -15  -4   0   -0.31    2.51
 -16  -4   0    4.89    2.93
 -18   5   0    5.62    2.74
 -18   5   0    7.95    2.39
 -17   5   0   -0.26    2.36
 -17   5   0   -0.15    1.85
 -16   5   0    5.42    2.21
 -16   5   0    6.01    1.80
 -15   5   0    3.19    1.63
 -14   5   0   94.19    4.07
 -13   5   0    5.76    1.42
 -12   5   0  232.51    8.22
 -11   5   0   25.42    1.38
 -10   5   0   82.30    2.64
  -9   5   0   56.83    2.07
  -8   5   0   68.05    2.45
  -7   5   0  407.10   11.68
  -6   5   0  722.62   17.23
   5  -5   0   16.28    1.54
  -5   5   0   16.72    1.59
   4  -5   0   39.66    0.86
  -4   5   0   40.20    0.90
  -3   5   0   19.32    1.14
  -3   5   0   18.74    0.99
   2  -5   0  131.14    4.37
  -2   5   0  134.17    4.39
   1  -5   0  714.37   19.78
  -1   5   0  713.43   19.79
   0  -5   0  247.14    6.13
   0   5   0  245.45    6.08
   0   5   0  246.17    6.07
  -1  -5   0  688.70   14.09
   1   5   0  680.17   14.01
   1   5   0  701.39   14.09
   1   5   0  689.16   14.06
  -2  -5   0   29.42    0.78
   2   5   0   29.74    0.61
  -3  -5   0   53.08    1.00
   3   5   0   51.94    1.30
  -4  -5   0   80.01    1.14
  -5  -5   0   24.37    1.74
   5   5   0   21.99    2.23
  -7  -5   0   83.47    2.28
   7   5   0   82.05    2.99
  -8  -5   0   16.81    1.17
   8   5   0   16.15    1.95
   9   5   0    5.27    2.38
  10   5   0   15.68    2.59
 -11  -5   0   31.52    2.10
  11   5   0   28.15    3.07
 -12  -5   0    4.97    1.89
 -13  -5   0   60.05    2.19
 -14  -5   0   -0.20    2.29
 -15  -5   0    2.02    2.81
 -19   6   0    1.34    2.97
 -19   6   0    2.61    2.53
 -18   6   0    1.41    2.68
 -18   6   0    2.09    2.35
 -17   6   0    6.50    2.01
 -17   6   0    6.15    2.35
 -16   6   0    1.57    2.33
 -16   6   0    1.79    1.72
 -15   6   0    0.71    1.50
 -14   6   0   31.17    1.76
 -13   6   0    0.83    1.29
 -12   6   0   18.80    1.38
 -11   6   0   71.92    2.88
 -10   6   0   88.34    3.30
  -9   6   0   45.36    2.09
  -8   6   0  225.75    7.85
  -7   6   0    1.46    0.63
  -6   6   0   18.84    1.03
   5  -6   0  196.40    3.73
  -5   6   0  196.58    3.75
  -4   6   0  106.88    4.96
  -4   6   0  107.48    5.04
  -3   6   0  126.10    4.24
   2  -6   0  474.05   12.72
  -2   6   0  475.97   12.74
   1  -6   0   34.91    2.01
  -1   6   0   31.33    1.96
   0  -6   0  446.37    7.33
   0   6   0  439.87    7.23
   0   6   0  450.11    7.27
  -1  -6   0  278.21    6.12
   1   6   0  275.63    5.98
   1   6   0  275.07    6.05
   1   6   0  274.74    6.07
  -2  -6   0   28.71    0.97
  -2  -6   0   29.48    0.97
  -3  -6   0  295.42    6.15
   3   6   0  297.96    6.27
  -4  -6   0  122.65    2.36
  -5  -6   0    2.02    1.02
   5   6   0    2.11    1.47
  -6  -6   0    9.53    1.23
   6   6   0    9.23    1.73
  -7  -6   0   76.81    2.58
   7   6   0   73.47    3.30
  -8  -6   0    2.72    1.27
   8   6   0    3.37    2.11
  -9  -6   0   16.63    2.03
   9   6   0   13.73    2.92
 -10  -6   0    3.70    1.78
  10   6   0    2.13    2.81
 -11  -6   0    1.42    1.90
  11   6   0    2.29    2.95
 -12  -6   0   25.30    2.13
  12   6   0   27.26    3.42
 -13  -6   0   11.38    2.62
 -14  -6   0    3.05    2.49
 -19   7   0    5.13    2.52
 -19   7   0    4.62    3.13
 -18   7   0   21.34    2.96
 -18   7   0   21.27    2.51
 -17   7   0    3.66    1.87
 -17   7   0    1.52    2.48
 -16   7   0    9.14    1.77
 -15   7   0    2.12    1.42
 -14   7   0    0.54    1.23
 -13   7   0   59.98    2.71
 -12   7   0  183.37    6.99
 -11   7   0   19.87    1.13
 -10   7   0    5.28    0.98
  -9   7   0   21.32    1.15
  -8   7   0   14.31    1.00
  -7   7   0    4.94    0.77
  -6   7   0    8.54    0.76
  -5   7   0  198.86    5.24
  -4   7   0   48.24    1.65
  -4   7   0   48.53    1.41
   3  -7   0  269.61    7.28
  -3   7   0  268.32    7.31
   2  -7   0  113.25    2.89
  -2   7   0  111.71    2.90
   1  -7   0  137.62    4.29
  -1   7   0  133.90    4.27
   0  -7   0   14.83    1.58
   0   7   0   14.64    1.68
   0   7   0   14.22    1.53
  -1  -7   0   16.68    2.11
   1   7   0   17.84    2.00
   1   7   0   19.68    2.01
  -2  -7   0    2.86    1.12
  -3  -7   0  290.52    5.68
   3   7   0  286.63    5.76
  -4  -7   0   14.77    1.52
   4   7   0   13.00    1.88
  -5  -7   0    4.68    1.20
   5   7   0    5.27    1.54
   6   7   0   -0.44    1.77
  -7  -7   0   13.01    1.60
   7   7   0   13.37    2.19
   8   7   0    6.91    2.40
  -9  -7   0   72.89    3.11
   9   7   0   71.00    3.65
 -10  -7   0   77.98    2.06
  10   7   0   78.22    3.06
 -11  -7   0   26.52    2.23
  11   7   0   26.63    3.27
 -12  -7   0   12.66    2.35
  12   7   0   14.63    3.79
 -13  -7   0    2.79    2.51
 -14  -7   0   -0.57    2.77
 -19   8   0   15.04    2.86
 -19   8   0   17.97    3.49
 -18   8   0   19.95    2.58
 -18   8   0   25.04    3.52
 -17   8   0   16.84    2.08
 -16   8   0    2.28    1.68
 -15   8   0    7.38    1.45
 -14   8   0   34.36    2.48
 -13   8   0   27.57    2.31
 -12   8   0  104.13    4.50
 -11   8   0   21.53    1.54
 -10   8   0    2.31    0.94
  -9   8   0   55.17    2.58
  -8   8   0    1.01    0.73
  -7   8   0    1.44    0.74
  -6   8   0   13.60    0.95
  -5   8   0  273.21    6.65
  -4   8   0  646.65   18.94
   3  -8   0  317.54    6.96
   2  -8   0    7.10    1.02
   1  -8   0  478.56   12.59
   0  -8   0    1.06    1.10
   0   8   0    0.57    1.09
   0   8   0    0.98    1.04
   1   8   0  158.63    2.85
   1   8   0  159.93    2.88
  -2  -8   0   29.62    1.12
   2   8   0   31.33    1.33
  -3  -8   0   64.35    1.70
   3   8   0   66.44    1.76
  -4  -8   0  206.74    6.53
   4   8   0  206.24    6.73
  -5  -8   0  190.84    3.22
   5   8   0  190.53    3.55
   6   8   0    8.66    2.25
  -7  -8   0   23.60    1.74
   7   8   0   22.67    2.28
  -8  -8   0    1.26    1.66
   8   8   0    1.94    2.59
  -9  -8   0    6.06    1.84
   9   8   0    7.58    2.88
 -10  -8   0   17.94    2.10
  10   8   0   20.61    3.46
 -11  -8   0    1.91    2.34
  11   8   0    2.21    3.47
 -12  -8   0    4.56    2.59
  12   8   0    4.49    3.97
 -13  -8   0    0.82    2.95
 -19   9   0   19.46    3.29
 -19   9   0   21.48    2.47
 -18   9   0    7.11    2.82
 -18   9   0    9.99    2.04
 -17   9   0    2.74    1.82
 -16   9   0   14.94    1.73
 -15   9   0   17.11    1.86
 -14   9   0   31.51    2.77
 -13   9   0   46.94    2.46
 -12   9   0   10.66    1.50
 -11   9   0   41.18    2.10
 -10   9   0   23.43    1.74
  -9   9   0    3.08    0.97
  -8   9   0    4.39    0.78
  -7   9   0   43.03    1.43
  -6   9   0   72.25    2.60
  -5   9   0    8.65    1.20
   3  -9   0   78.79    2.25
   2  -9   0   18.46    1.40
   1  -9   0    9.19    1.12
  -1   9   0    8.60    1.24
   0  -9   0   14.60    1.36
   0   9   0   14.41    1.32
   0   9   0   15.40    1.26
  -1  -9   0  488.35    5.87
   1   9   0  484.35    5.69
   1   9   0  482.18    5.71
  -2  -9   0   16.58    1.43
   2   9   0   17.53    1.43
  -3  -9   0   16.59    1.91
  -4  -9   0    2.80    1.54
   4   9   0    3.10    1.80
  -5  -9   0   91.13    1.77
   5   9   0   92.61    2.17
  -6  -9   0    1.99    1.54
   6   9   0    4.31    2.18
  -7  -9   0   20.95    1.89
   7   9   0   22.51    2.63
  -8  -9   0   10.14    1.80
   8   9   0   11.08    2.69
  -9  -9   0    0.28    2.19
   9   9   0    0.22    3.02
  10   9   0   18.92    3.71
 -11  -9   0    2.33    2.72
  11   9   0    1.22    3.93
 -12  -9   0    7.08    2.92
  12   9   0    2.46    4.12
 -13  -9   0   14.74    3.46
 -19  10   0    7.47    2.48
 -19  10   0    7.88    3.49
 -18  10   0   -0.18    1.88
 -17  10   0   12.52    1.83
 -16  10   0    0.24    1.59
 -15  10   0   27.67    2.43
 -14  10   0   74.55    3.34
 -13  10   0    0.65    1.32
 -12  10   0    9.40    1.49
 -11  10   0   14.76    1.23
 -10  10   0    5.21    1.08
  -9  10   0   16.95    1.15
  -8  10   0   24.51    1.02
  -7  10   0   66.50    2.25
  -6  10   0   10.41    1.00
  -5  10   0    9.35    0.67
   4 -10   0   17.60    1.02
   3 -10   0   11.68    1.15
   2 -10   0   51.04    2.12
   1 -10   0  174.48    4.10
  -1  10   0  169.91    3.99
   0 -10   0   40.14    1.45
   0  10   0   38.62    1.31
  -1 -10   0   82.59    1.81
   1  10   0   82.43    1.83
   1  10   0   83.57    1.79
  -2 -10   0   71.43    2.48
   2  10   0   67.29    2.15
   2  10   0   70.26    2.59
  -3 -10   0   27.96    1.93
   3  10   0   29.47    1.92
   4  10   0  158.27    2.49
  -5 -10   0    9.88    1.81
   5  10   0   10.97    2.18
  -6 -10   0    3.39    1.80
   6  10   0    6.86    2.46
  -7 -10   0   48.58    2.09
   7  10   0   50.50    2.66
  -8 -10   0    0.42    2.00
   8  10   0    1.61    2.99
  -9 -10   0    0.81    2.42
   9  10   0   -0.32    3.23
 -10 -10   0    6.89    2.77
  10  10   0    9.71    3.93
 -11 -10   0    1.17    2.73
  11  10   0    0.90    4.37
 -12 -10   0   50.80    3.19
  12  10   0   48.69    4.58
 -19  11   0   -0.80    3.20
 -19  11   0    0.99    2.10
 -18  11   0    1.21    1.86
 -17  11   0    4.66    1.94
 -16  11   0    1.63    1.74
 -15  11   0   11.02    1.64
 -14  11   0   45.78    2.80
 -13  11   0   56.11    3.62
 -12  11   0   13.47    1.44
 -11  11   0   31.53    1.71
 -10  11   0    7.78    1.12
  -9  11   0   40.43    1.90
  -8  11   0   43.65    2.69
  -7  11   0  245.89    6.76
  -6  11   0   29.24    1.01
  -5  11   0   36.58    2.22
   4 -11   0  104.50    2.23
   3 -11   0   64.35    2.51
   2 -11   0    4.92    1.51
   1 -11   0   75.32    2.71
  -1  11   0   75.85    2.45
   0 -11   0   46.41    3.64
   0  11   0   42.36    3.43
  -1 -11   0   25.55    1.73
   1  11   0   24.96    1.76
  -2 -11   0    3.53    1.95
   2  11   0    2.80    1.90
   2  11   0    3.61    1.88
  -3 -11   0   52.96    1.94
   3  11   0   54.68    2.26
  -4 -11   0  256.44    3.75
   4  11   0  255.16    3.76
  -5 -11   0    0.01    2.11
   5  11   0    1.11    2.48
  -6 -11   0    1.35    2.17
   6  11   0    1.42    2.68
  -7 -11   0   10.29    2.26
   7  11   0   11.08    2.96
  -8 -11   0    1.98    2.46
   8  11   0    2.32    3.23
  -9 -11   0   10.24    2.72
   9  11   0   10.03    3.52
 -10 -11   0    3.45    3.10
  10  11   0    4.27    4.37
 -11 -11   0   -0.45    3.17
  11  11   0   -0.81    4.54
 -19  12   0   10.90    2.43
 -18  12   0    1.35    2.01
 -17  12   0   13.03    2.22
 -16  12   0    1.28    1.78
 -15  12   0    2.22    1.65
 -14  12   0    2.44    1.48
 -13  12   0   35.16    2.62
 -12  12   0    1.63    1.20
 -11  12   0   85.04    3.17
 -10  12   0   14.27    1.34
  -9  12   0   13.82    1.44
  -8  12   0    9.30    1.30
  -7  12   0   16.01    1.02
  -6  12   0   37.96    1.72
   4 -12   0   20.85    1.37
   3 -12   0   37.38    2.42
   2 -12   0   12.58    1.63
   1 -12   0   79.65    3.45
  -1  12   0   75.26    3.28
   0 -12   0   19.31    1.79
   0  12   0   19.49    1.76
   1  12   0   82.31    3.10
  -2 -12   0    6.85    1.94
   2  12   0    7.90    2.27
   2  12   0    7.46    2.07
  -3 -12   0   10.61    2.08
   3  12   0    9.83    2.11
  -4 -12   0  113.68    2.61
   4  12   0  112.84    2.98
  -5 -12   0   26.83    2.54
   5  12   0   26.86    2.89
  -6 -12   0    0.01    2.58
   6  12   0    0.87    2.89
  -7 -12   0    1.77    2.90
   7  12   0    3.29    3.26
  -8 -12   0    2.53    2.71
   8  12   0    2.71    3.54
  -9 -12   0    1.58    3.27
   9  12   0    3.19    3.97
 -10 -12   0    3.19    3.30
  10  12   0    6.32    4.75
 -18  13   0    1.63    2.11
 -17  13   0   10.45    2.30
 -16  13   0    0.52    1.69
 -15  13   0   -0.38    1.60
 -14  13   0   10.62    1.52
 -13  13   0   14.91    1.52
 -12  13   0    5.60    1.37
 -11  13   0    1.23    1.23
 -10  13   0   93.91    3.32
  -9  13   0    3.26    1.02
  -8  13   0   35.41    1.92
  -7  13   0   32.83    1.19
  -6  13   0   36.85    1.74
   4 -13   0   73.96    1.91
   3 -13   0   31.50    2.85
   2 -13   0  111.02    3.72
  -2  13   0  105.69    3.64
   1 -13   0    3.61    1.89
  -1  13   0    4.94    1.86
   0 -13   0    9.71    1.87
   0  13   0   11.53    1.86
  -1 -13   0    2.39    2.14
   1  13   0    4.03    2.19
   2  13   0   25.68    3.12
   2  13   0   26.10    2.22
  -3 -13   0    4.93    2.35
   3  13   0    4.85    2.39
  -4 -13   0    0.68    2.35
   4  13   0    0.54    2.88
  -5 -13   0    5.16    2.65
   5  13   0    6.44    3.04
  -6 -13   0    4.64    2.75
   6  13   0    5.76    3.20
  -7 -13   0   -0.64    2.71
   7  13   0   -0.82    3.39
  -8 -13   0   15.01    3.16
   8  13   0   16.45    3.98
  -9 -13   0    4.85    3.48
   9  13   0    8.52    4.59
 -18  14   0    0.00    2.02
 -17  14   0    1.25    1.84
 -16  14   0    1.75    1.75
 -15  14   0    5.55    1.66
 -14  14   0    3.83    1.51
 -13  14   0   55.47    3.00
 -12  14   0    6.44    1.53
 -11  14   0   47.79    2.35
 -10  14   0    6.37    1.31
  -9  14   0    4.24    1.32
  -8  14   0   20.51    1.29
  -7  14   0   12.86    0.94
  -6  14   0   61.66    2.13
   4 -14   0   19.68    1.80
   3 -14   0   22.73    1.72
   2 -14   0   21.09    1.96
  -2  14   0   19.84    1.92
   1 -14   0   15.90    2.00
  -1  14   0   14.82    2.19
   0 -14   0   43.96    2.24
   0  14   0   46.54    2.40
  -1 -14   0   43.71    2.55
   1  14   0   42.26    2.36
  -2 -14   0    0.87    2.58
   2  14   0    1.16    2.62
  -3 -14   0    2.13    2.66
   3  14   0    6.17    2.78
  -4 -14   0    5.16    2.67
  -5 -14   0   15.28    2.71
   5  14   0   16.81    3.27
  -6 -14   0    3.02    3.11
   6  14   0    7.17    3.54
  -7 -14   0   10.22    3.39
   7  14   0    7.50    3.95
  -8 -14   0    0.70    3.42
   8  14   0    2.85    4.37
  -9 -14   0    3.03    4.14
   9  14   0   -0.29    4.72
 -18  15   0    1.15    2.19
 -17  15   0    5.96    2.07
 -16  15   0   21.24    2.22
 -15  15   0    1.55    1.61
 -14  15   0    1.79    1.58
 -13  15   0   47.69    2.78
 -12  15   0    1.82    1.37
 -11  15   0   11.44    1.71
 -10  15   0    1.02    1.18
  -9  15   0    2.97    1.32
  -8  15   0  136.92    3.17
  -7  15   0   12.60    1.21
  -6  15   0   13.44    1.13
   4 -15   0   30.61    1.89
   3 -15   0   -0.51    1.95
   2 -15   0  102.59    2.62
  -2  15   0  103.93    2.75
   1 -15   0    4.15    2.24
   0 -15   0   59.76    2.73
   0  15   0   61.59    2.76
  -1 -15   0    0.19    2.38
   1  15   0   -0.24    2.67
  -2 -15   0    5.50    2.77
   2  15   0    3.57    2.76
  -3 -15   0    0.30    2.79
   3  15   0    0.97    3.17
  -4 -15   0   -0.07    3.13
   4  15   0    2.57    3.56
  -5 -15   0   55.75    3.24
   5  15   0   59.22    3.66
  -6 -15   0   14.04    3.53
   6  15   0   16.83    3.92
  -7 -15   0   -0.05    3.82
   7  15   0   -0.94    4.34
  -8 -15   0    4.43    4.07
   8  15   0    8.48    4.94
 -17  16   0   -0.30    1.98
 -16  16   0   22.28    2.41
 -15  16   0    1.93    1.69
 -14  16   0    5.48    1.85
 -13  16   0   24.08    1.89
 -12  16   0    7.11    1.64
 -11  16   0   20.76    1.75
 -10  16   0   24.68    1.48
  -9  16   0    6.30    1.41
  -8  16   0  117.43    3.65
  -7  16   0    9.36    1.22
  -6  16   0    7.03    1.21
   4 -16   0    3.69    2.24
   3 -16   0    0.17    2.32
  -3  16   0   -0.64    2.44
   2 -16   0   70.37    2.35
  -2  16   0   72.09    2.61
   1 -16   0    2.24    2.40
  -1  16   0    1.76    2.59
   0 -16   0    2.20    2.55
   0  16   0    3.16    2.82
  -1 -16   0   23.83    2.77
   1  16   0   25.46    2.96
  -2 -16   0   14.50    2.96
   2  16   0   13.62    2.99
  -3 -16   0    0.50    3.09
   3  16   0   -0.40    3.63
  -4 -16   0    1.21    3.34
   4  16   0    3.84    3.78
  -5 -16   0    2.51    3.60
   5  16   0    5.52    4.10
   6  16   0    2.38    4.48
 -17  17   0    3.23    2.19
 -16  17   0   15.43    2.19
 -15  17   0    2.79    1.95
 -14  17   0    0.45    1.84
 -13  17   0    4.09    1.86
 -12  17   0    5.89    1.67
 -11  17   0   17.73    1.66
  -9  17   0    0.30    1.36
  -8  17   0    0.35    1.41
  -7  17   0    0.29    1.28
  -6  17   0   48.51    1.92
   4 -17   0   11.91    2.33
   3 -17   0    1.68    2.49
  -3  17   0    2.43    2.86
   2 -17   0    0.85    2.60
  -2  17   0    0.79    2.91
   1 -17   0   -0.23    2.66
  -1  17   0   -0.44    2.96
   0 -17   0   13.54    2.89
   0  17   0   14.34    3.17
  -1 -17   0   17.14    3.10
   1  17   0   16.18    3.32
   1  17   0   18.27    2.55
  -2 -17   0    3.68    3.08
   2  17   0    1.93    3.46
  -3 -17   0    3.40    3.56
   3  17   0    4.59    3.95
  -4 -17   0    1.53    3.62
   4  17   0   -0.71    4.10
  -5 -17   0    0.96    4.18
   5  17   0    0.47    4.53
 -16  18   0   10.68    2.44
 -15  18   0    1.54    1.91
 -14  18   0    1.55    1.89
 -13  18   0    0.19    1.74
 -12  18   0   18.58    1.91
 -11  18   0    3.70    1.77
 -10  18   0    0.82    1.59
  -9  18   0    1.89    1.51
  -8  18   0    0.74    1.50
  -7  18   0   16.44    1.65
  -6  18   0    0.27    1.51
   4 -18   0   15.08    2.80
  -4  18   0   14.22    3.23
   3 -18   0    1.41    2.78
  -3  18   0    2.99    3.22
   2 -18   0    6.36    3.17
   1 -18   0    0.25    2.94
  -1  18   0    0.17    3.22
   0 -18   0    4.05    3.07
   0  18   0    2.66    3.51
  -1 -18   0   -0.05    3.20
   1  18   0   -0.41    3.61
   1  18   0    0.78    2.73
  -2 -18   0    8.00    3.57
   2  18   0    2.86    3.82
  -3 -18   0   22.83    3.60
   3  18   0   23.62    4.60
  -4 -18   0    2.90    3.98
   4  18   0    1.14    4.56
 -16  19   0   -0.11    2.11
 -15  19   0   -0.44    2.03
 -14  19   0    8.67    2.08
 -13  19   0    4.76    1.78
 -12  19   0   16.40    2.01
 -11  19   0    0.37    1.74
 -10  19   0   -0.33    1.66
  -9  19   0   22.52    1.84
  -8  19   0   37.18    2.25
  -7  19   0    7.53    1.60
  -6  19   0    4.63    1.71
  -5  19   0    2.54    3.51
   4 -19   0   14.91    2.92
  -4  19   0   17.16    3.63
   3 -19   0    4.27    3.01
  -3  19   0    2.35    3.54
   2 -19   0    2.11    3.36
  -2  19   0    0.24    3.55
   1 -19   0   16.50    3.25
  -1  19   0   16.58    3.65
   0 -19   0    1.12    3.38
   0  19   0    4.37    3.83
   0  19   0    0.73    3.07
  -1 -19   0    8.03    3.59
   1  19   0    8.47    4.01
  -2 -19   0    9.49    3.84
   2  19   0   16.77    4.77
 -14  20   0    8.83    2.29
 -13  20   0    5.55    2.09
 -12  20   0    1.94    2.07
 -11  20   0    1.61    2.00
 -10  20   0   45.30    2.32
  -9  20   0    1.17    1.70
  -8  20   0    2.75    1.80
  -7  20   0    4.45    1.83
  -6  20   0    2.30    1.87
  -5  20   0    7.91    3.86
   4 -20   0    6.65    3.47
  -4  20   0    4.77    4.04
   3 -20   0    1.25    3.20
  -3  20   0    1.33    3.88
   2 -20   0   12.25    3.37
  -2  20   0   17.84    3.90
   1 -20   0    0.74    3.84
  -1  20   0    1.76    3.40
   0  20   0   -0.77    4.27
  -1 -20   0   12.93    3.91
 -13  21   0    0.76    2.14
 -12  21   0    3.35    2.27
 -11  21   0    6.48    2.13
 -10  21   0   14.47    2.15
  -9  21   0   -0.06    1.93
  -8  21   0    1.48    2.00
  -7  21   0   -0.45    1.93
  -6  21   0    0.40    4.50
  -6  21   0    2.45    2.03
  -5  21   0    1.47    4.37
   4 -21   0   -0.08    3.49
  -4  21   0   -0.79    4.04
   3 -21   0   -0.22    3.66
  -3  21   0   -0.37    4.23
   2 -21   0    4.78    4.01
  -2  21   0    8.73    4.33
  -2  21   0    5.48    3.95
   1 -21   0    6.49    4.23
  -1  21   0    8.25    4.43
 -11  22   0    0.25    2.06
 -10  22   0    3.45    2.06
  -9  22   0   11.61    2.19
  -8  22   0    0.43    2.10
  -7  22   0   13.29    4.74
  -6  22   0    4.26    4.62
  -6  22   0    1.52    2.14
  -5  22   0   -1.18    4.66
   4 -22   0   -0.26    3.76
  -4  22   0    2.34    4.64
  -3  22  -1    1.60    4.18
  -3  22  -1    7.21    4.81
   3 -22   1    1.97    3.84
  -4  22  -1   -1.13    4.70
  -4  22  -1    0.37    4.04
   4 -22   1    2.23    3.72
  -6  22  -1   -0.13    2.07
  -6  22  -1   -0.57    4.89
  -7  22  -1    1.57    2.21
  -8  22  -1    1.22    2.17
  -9  22  -1   -0.52    2.03
 -10  22  -1   -0.28    2.16
 -11  22  -1    1.28    2.29
  -1  21  -1    1.99    4.57
  -1  21  -1    2.77    3.94
  -2  21  -1    4.73    4.31
  -2  21  -1    0.69    3.81
   2 -21   1    0.70    3.52
  -3  21  -1    0.99    3.70
  -3  21  -1    1.63    4.33
   3 -21   1    1.06    3.42
  -4  21  -1    2.26    4.30
   4 -21   1    1.27    3.25
  -5  21  -1    2.04    4.19
  -6  21  -1   -0.39    1.85
  -7  21  -1    6.69    1.90
  -8  21  -1    2.68    1.90
  -9  21  -1    2.34    1.99
 -10  21  -1    1.19    2.02
 -11  21  -1    1.93    2.05
 -12  21  -1    1.07    2.07
 -13  21  -1    2.41    2.22
  -1 -20   1    3.32    3.74
   0  20  -1    7.37    4.27
   0 -20   1    9.77    3.97
  -1  20  -1    4.64    3.48
  -1  20  -1    2.42    4.03
   1 -20   1    2.77    3.47
  -2  20  -1   11.99    3.91
  -2  20  -1   14.04    3.45
   2 -20   1   13.37    3.53
  -3  20  -1    1.15    3.94
   3 -20   1    1.57    3.20
  -4  20  -1   -0.38    3.96
   4 -20   1    1.77    3.05
  -5  20  -1    0.69    3.88
  -6  20  -1    8.99    1.71
  -7  20  -1   43.58    2.19
  -8  20  -1    1.19    1.82
  -9  20  -1    1.66    1.76
 -10  20  -1    4.44    1.77
 -11  20  -1    2.14    1.94
 -12  20  -1    9.08    2.03
 -13  20  -1    3.16    2.07
 -14  20  -1    3.26    2.05
 -15  20  -1    8.19    2.29
   3  19  -1    9.98    4.83
  -3 -19   1    7.99    3.87
  -2 -19   1    3.87    3.77
   1  19  -1    4.13    4.12
  -1 -19   1    3.93    3.59
   0  19  -1    4.01    3.93
   0  19  -1    1.28    2.87
   0 -19   1    2.42    3.22
  -1  19  -1    8.95    3.56
   1 -19   1    9.21    3.07
  -2  19  -1   18.04    3.58
   2 -19   1   16.97    2.92
  -3  19  -1    2.95    3.54
  -4  19  -1    2.77    3.47
   4 -19   1    4.93    2.91
  -6  19  -1   50.84    1.83
  -7  19  -1   -0.37    1.55
  -8  19  -1    3.11    1.61
  -9  19  -1    5.81    1.61
 -10  19  -1   11.01    1.65
 -11  19  -1   -0.29    1.69
 -12  19  -1    3.15    1.80
 -13  19  -1   -0.15    1.80
 -14  19  -1   21.73    2.29
 -15  19  -1    8.46    2.43
 -16  19  -1    9.14    2.39
   4  18  -1   -0.93    4.48
  -4 -18   1    2.15    4.07
   3  18  -1   12.56    4.45
  -3 -18   1    9.19    3.39
   2  18  -1    0.73    3.75
  -2 -18   1    0.89    3.17
   1  18  -1    2.93    2.62
   1  18  -1    1.77    3.57
  -1 -18   1    0.50    3.19
   0  18  -1    0.43    2.99
   0  18  -1   -0.12    3.34
   0 -18   1    0.00    2.89
  -1  18  -1    3.14    3.22
   1 -18   1    1.99    2.88
  -2  18  -1    2.33    3.20
   2 -18   1    0.40    2.84
  -3  18  -1    6.25    3.06
   3 -18   1    7.54    2.62
  -4  18  -1   13.13    3.22
   4 -18   1   13.61    2.72
  -6  18  -1    4.05    1.38
  -7  18  -1   32.67    2.02
  -8  18  -1    6.53    1.48
  -9  18  -1   13.40    1.50
 -10  18  -1   15.73    1.73
 -11  18  -1    9.22    1.83
 -12  18  -1   20.40    2.22
 -13  18  -1   10.33    1.82
 -14  18  -1    0.86    1.75
 -15  18  -1    3.49    2.06
 -16  18  -1    2.75    2.01
   6  17  -1    2.76    4.59
  -6 -17   1    1.30    3.90
   5  17  -1    1.78    4.19
  -5 -17   1    1.94    3.56
   4  17  -1   -0.39    4.17
  -4 -17   1    2.01    3.53
   3  17  -1    9.66    3.74
  -3 -17   1    7.00    3.50
   2  17  -1   12.73    3.39
  -2 -17   1   16.17    3.12
   1  17  -1    0.83    3.22
   1  17  -1    0.37    2.38
  -1 -17   1    3.14    2.85
   0  17  -1    5.46    2.45
   0  17  -1    5.27    2.93
   0 -17   1    7.74    2.81
  -1  17  -1    2.31    2.87
   1 -17   1    0.78    2.64
  -2  17  -1    4.29    2.82
   2 -17   1    6.62    2.59
  -3  17  -1   16.09    2.88
   3 -17   1   15.42    2.35
   4 -17   1    2.95    2.32
  -6  17  -1    1.34    1.27
  -7  17  -1   12.56    1.54
  -8  17  -1    5.63    1.27
  -9  17  -1    8.86    1.44
 -10  17  -1    8.43    1.56
 -11  17  -1    2.72    1.56
 -12  17  -1   16.56    1.81
 -13  17  -1    3.96    1.68
 -14  17  -1    6.00    1.77
 -15  17  -1    2.65    1.91
 -16  17  -1    1.55    1.95
 -17  17  -1    0.71    2.04
   7  16  -1   -1.13    4.60
  -7 -16   1   -0.92    3.78
   6  16  -1    7.92    4.20
  -6 -16   1    5.22    3.87
   5  16  -1   52.32    4.04
  -5 -16   1   55.43    3.75
   4  16  -1    3.04    3.81
  -4 -16   1    1.89    3.21
   3  16  -1    7.88    3.36
  -3 -16   1    2.37    2.94
   2  16  -1    9.26    3.10
  -2 -16   1    9.90    2.91
   1  16  -1   12.61    2.90
   1  16  -1   13.59    2.40
  -1 -16   1   10.12    2.76
   0 -16   1    4.51    2.51
  -1  16  -1    4.88    2.62
   1 -16   1    4.58    2.31
  -2  16  -1    3.75    2.63
   2 -16   1    3.25    2.26
  -3  16  -1   36.88    2.43
   3 -16   1   38.34    2.22
   4 -16   1    6.68    1.96
  -6  16  -1   41.22    1.35
  -7  16  -1    3.56    1.32
  -8  16  -1    1.96    1.14
  -9  16  -1   13.87    1.47
 -10  16  -1    0.33    1.34
 -11  16  -1    4.55    1.54
 -12  16  -1   38.16    3.01
 -13  16  -1   15.51    2.00
 -14  16  -1    1.01    1.69
 -15  16  -1   10.08    1.78
 -16  16  -1    1.06    1.92
 -17  16  -1    3.18    2.08
   8  15  -1    0.07    4.65
  -8 -15   1    4.39    3.77
   7  15  -1   -0.80    4.15
  -7 -15   1    1.30    3.82
   6  15  -1   24.51    3.82
  -6 -15   1   20.81    3.54
   5  15  -1   23.72    3.53
  -5 -15   1   24.96    3.22
   4  15  -1   -0.60    3.33
  -4 -15   1    0.41    3.03
   3  15  -1   26.86    2.88
  -3 -15   1   27.51    3.01
   2  15  -1   13.25    2.62
  -2 -15   1   13.74    2.68
   1  15  -1    1.20    2.50
   1  15  -1   -0.39    1.84
  -1 -15   1   -0.56    2.35
   0  15  -1    7.48    2.50
   0 -15   1    8.40    2.56
  -1  15  -1    2.21    2.31
   1 -15   1    1.16    2.20
  -2  15  -1    2.15    2.16
   2 -15   1    2.66    2.06
   3 -15   1   52.21    2.20
   4 -15   1   94.46    3.37
  -6  15  -1  146.51    2.69
  -7  15  -1    3.44    1.17
  -8  15  -1    7.88    1.29
  -9  15  -1    3.53    1.22
 -10  15  -1    9.21    1.56
 -11  15  -1   22.37    1.46
 -12  15  -1   44.64    2.94
 -13  15  -1   39.12    3.16
 -14  15  -1    0.22    1.52
 -15  15  -1    3.13    1.68
 -16  15  -1    2.83    1.89
 -17  15  -1    4.61    2.13
 -18  15  -1    1.39    2.10
   9  14  -1    3.99    4.74
  -9 -14   1    5.30    3.71
   8  14  -1    0.13    4.33
  -8 -14   1    7.81    3.47
   7  14  -1    6.48    3.66
  -7 -14   1    6.14    3.07
   6  14  -1   16.65    3.43
   5  14  -1    1.18    3.10
  -5 -14   1    2.00    2.84
  -4 -14   1   73.76    2.76
   3  14  -1   35.13    2.58
  -3 -14   1   35.97    2.58
   2  14  -1   29.16    2.39
  -2 -14   1   30.89    2.40
   1  14  -1    3.83    2.10
  -1 -14   1    5.68    2.35
   0  14  -1    1.46    2.05
   0 -14   1    0.64    2.02
  -1  14  -1    4.95    2.24
   1 -14   1    4.91    2.03
  -2  14  -1   18.40    2.10
   2 -14   1   19.90    1.85
   3 -14   1   -0.39    1.71
   4 -14   1   59.58    2.19
  -6  14  -1   16.39    1.04
  -7  14  -1   23.07    1.49
  -8  14  -1  117.20    3.36
  -9  14  -1    3.38    1.10
 -10  14  -1    3.55    1.12
 -11  14  -1    2.21    1.20
 -12  14  -1    1.40    1.31
 -13  14  -1    3.62    1.55
 -14  14  -1   19.25    2.18
 -15  14  -1   24.29    2.03
 -16  14  -1    0.72    1.71
 -17  14  -1    9.98    2.11
 -18  14  -1    1.58    1.95
  10  13  -1    0.97    4.73
 -10 -13   1   -0.75    3.45
   9  13  -1    4.45    4.33
  -9 -13   1    3.58    3.62
   8  13  -1    5.59    3.85
  -8 -13   1    4.55    3.03
   7  13  -1    5.60    3.58
  -7 -13   1    2.08    3.00
   6  13  -1   60.46    3.16
  -6 -13   1   61.12    2.96
   5  13  -1   96.62    3.15
   4  13  -1    2.24    2.68
  -4 -13   1    2.38    2.42
   3  13  -1   74.10    2.37
  -3 -13   1   72.82    2.28
   2  13  -1    1.97    1.96
   2  13  -1    2.58    1.45
   2  13  -1    2.24    2.15
  -2 -13   1    2.07    2.19
   1  13  -1   59.71    2.32
  -1 -13   1   59.83    2.33
   0  13  -1   31.65    1.95
   0 -13   1   29.85    1.81
  -1  13  -1    1.01    1.73
   1 -13   1    1.42    1.74
   2 -13   1   57.10    2.18
   3 -13   1   34.28    1.71
   4 -13   1   17.64    1.67
  -5  13  -1   18.02    1.64
  -6  13  -1    1.08    0.87
  -7  13  -1    8.32    0.97
  -8  13  -1   45.78    1.85
  -9  13  -1   62.40    2.04
 -10  13  -1    2.13    1.08
 -11  13  -1   13.88    1.44
 -12  13  -1   18.54    1.72
 -13  13  -1    0.84    1.37
 -14  13  -1    0.43    1.50
 -15  13  -1    6.44    1.81
 -16  13  -1    5.10    1.89
 -17  13  -1    0.53    1.88
 -18  13  -1    6.39    2.19
  11  12  -1    9.76    5.00
  10  12  -1   -0.04    4.30
 -10 -12   1    0.45    3.31
   9  12  -1    1.36    3.75
  -9 -12   1   -0.42    3.09
   8  12  -1    3.49    3.42
  -8 -12   1    2.03    2.64
   7  12  -1    7.81    3.01
   6  12  -1    3.15    2.75
   5  12  -1    1.89    2.61
  -5 -12   1    1.70    2.10
   4  12  -1    7.73    2.49
  -4 -12   1    6.47    2.30
   3  12  -1    7.46    2.16
  -3 -12   1    6.01    2.09
   2  12  -1   31.75    2.39
   2  12  -1   28.93    2.23
  -2 -12   1   30.86    2.37
   1  12  -1   15.40    1.76
  -1 -12   1   14.86    1.91
   0  12  -1  109.74    2.80
   0 -12   1  107.10    2.79
  -1  12  -1    6.45    1.63
   1 -12   1    5.01    1.51
   2 -12   1   13.47    1.54
   3 -12   1   13.84    1.51
   4 -12   1  131.14    4.94
  -5  12  -1   12.11    0.83
  -6  12  -1  138.80    4.34
  -7  12  -1   97.27    3.34
  -8  12  -1   10.89    1.15
  -9  12  -1   30.30    1.80
 -10  12  -1   22.12    1.82
 -11  12  -1   60.57    3.12
 -12  12  -1   50.42    2.68
 -13  12  -1   46.39    2.96
 -14  12  -1    5.07    1.48
 -15  12  -1   15.62    1.96
 -16  12  -1   21.36    2.13
 -17  12  -1    0.70    1.80
 -18  12  -1    0.77    1.94
 -19  12  -1    3.02    3.46
 -19  12  -1    5.18    2.29
  11  11  -1    8.87    4.57
 -11 -11   1    9.46    3.02
  10  11  -1    3.96    3.75
 -10 -11   1    7.21    2.98
   9  11  -1   12.94    3.52
  -9 -11   1   10.77    2.57
   8  11  -1   69.75    3.22
  -8 -11   1   68.11    2.55
   7  11  -1    3.51    2.74
  -7 -11   1    5.11    2.31
   6  11  -1   20.06    2.49
  -6 -11   1   19.31    2.09
   5  11  -1    2.77    2.40
  -5 -11   1    2.47    1.94
   4  11  -1   44.16    2.45
  -4 -11   1   43.43    2.22
   3  11  -1    6.61    2.03
  -3 -11   1    7.80    1.91
   2  11  -1  106.12    2.87
   2  11  -1  106.24    2.81
  -2 -11   1  110.17    3.13
   1  11  -1  159.76    3.27
   1  11  -1  165.21    3.36
  -1 -11   1  163.09    3.45
   0  11  -1  318.97    6.16
   0 -11   1  323.07    6.25
  -1  11  -1   32.77    1.95
   1 -11   1   34.86    2.03
   2 -11   1  202.03    6.28
   3 -11   1   62.59    2.09
   4 -11   1   50.04    2.31
  -5  11  -1    5.80    0.70
  -6  11  -1    6.18    0.97
  -7  11  -1  190.87    4.33
  -8  11  -1   40.31    1.35
  -9  11  -1   15.38    1.19
 -10  11  -1  151.85    5.44
 -11  11  -1   50.85    2.10
 -12  11  -1    0.88    1.18
 -13  11  -1   10.15    1.61
 -14  11  -1    0.24    1.34
 -15  11  -1   46.86    3.13
 -16  11  -1    2.88    1.71
 -17  11  -1    0.99    1.87
 -18  11  -1    2.85    3.00
 -18  11  -1    2.07    2.03
 -19  11  -1   14.77    2.44
 -19  11  -1   12.60    3.46
  12  10  -1   12.04    4.43
 -12 -10   1    6.76    2.74
  11  10  -1    0.72    3.97
  10  10  -1    2.06    3.46
 -10 -10   1    2.33    2.40
   9  10  -1    6.52    3.14
  -9 -10   1    5.60    2.24
   8  10  -1   30.89    2.99
  -8 -10   1   31.59    2.17
   7  10  -1    1.48    2.51
  -7 -10   1    0.95    1.85
   6  10  -1    7.15    2.32
  -6 -10   1    9.05    1.96
   5  10  -1   50.49    2.17
  -5 -10   1   48.52    1.70
   4  10  -1   34.03    1.93
  -4 -10   1   34.26    1.69
   3  10  -1    2.11    1.68
  -3 -10   1    1.39    1.45
   2  10  -1   40.86    1.80
  -2 -10   1   39.22    1.72
   1  10  -1   11.35    1.41
   1  10  -1   11.31    1.41
  -1 -10   1   10.43    1.53
   0  10  -1   15.29    1.40
   0 -10   1   14.06    1.33
   1 -10   1   86.50    3.21
   2 -10   1   16.11    1.48
   3 -10   1    7.88    1.06
  -5  10  -1   16.57    0.66
  -6  10  -1   67.42    1.45
  -7  10  -1  182.59    3.88
  -8  10  -1    0.16    0.82
  -9  10  -1   27.41    1.43
 -10  10  -1   40.34    1.48
 -11  10  -1   49.63    2.28
 -12  10  -1    3.70    1.40
 -13  10  -1   12.58    1.90
 -14  10  -1    6.01    1.41
 -15  10  -1   17.29    1.73
 -16  10  -1   -0.15    1.59
 -17  10  -1    1.79    1.88
 -18  10  -1   14.90    3.16
 -18  10  -1   13.21    2.12
 -19  10  -1   29.77    2.78
 -19  10  -1   25.40    3.65
  13   9  -1   -0.11    4.34
 -13  -9   1    1.08    2.88
  12   9  -1   20.90    3.89
 -12  -9   1   19.77    2.62
  11   9  -1    6.16    3.56
 -11  -9   1    6.45    2.42
  10   9  -1    0.32    3.04
 -10  -9   1    0.59    2.03
   9   9  -1    2.95    2.89
  -9  -9   1    3.22    1.87
   8   9  -1   40.40    2.65
  -8  -9   1   40.05    1.88
   7   9  -1   36.12    2.40
  -7  -9   1   36.16    1.85
   6   9  -1    6.17    2.08
  -6  -9   1    4.45    1.59
   5   9  -1    4.71    2.00
   4   9  -1   13.01    1.71
  -4  -9   1   11.13    1.45
   3   9  -1  228.18    4.20
  -3  -9   1  228.63    4.12
   2   9  -1    8.34    1.36
  -2  -9   1    7.41    1.26
   1   9  -1   15.88    1.89
  -1  -9   1   14.97    1.71
   0   9  -1   63.03    3.26
   0  -9   1   62.96    3.36
   1  -9   1   23.49    1.22
   2  -9   1    6.83    1.26
   3  -9   1   76.10    2.15
  -4   9  -1   46.69    1.32
  -5   9  -1    3.68    0.61
  -6   9  -1  229.33    4.64
  -7   9  -1   76.58    3.35
  -8   9  -1   70.73    2.90
  -9   9  -1  200.80    5.02
 -10   9  -1   86.26    3.36
 -11   9  -1   53.11    2.33
 -12   9  -1   34.32    2.05
 -13   9  -1   19.80    1.80
 -14   9  -1    7.53    1.42
 -15   9  -1    0.39    1.41
 -16   9  -1    4.56    1.74
 -17   9  -1   13.88    2.11
 -17   9  -1   17.02    3.07
 -18   9  -1   15.04    2.87
 -18   9  -1   15.29    1.97
 -19   9  -1    3.30    3.10
 -19   9  -1    4.89    2.71
 -14  -8   1    0.19    2.78
  13   8  -1   -0.90    3.98
 -13  -8   1   -0.34    2.54
  12   8  -1   52.61    3.88
 -12  -8   1   53.52    2.74
  11   8  -1    5.48    3.43
 -11  -8   1    3.98    2.01
  10   8  -1    2.21    3.03
 -10  -8   1    2.09    1.97
   9   8  -1   71.63    2.84
  -9  -8   1   70.35    1.73
   8   8  -1    6.95    2.52
  -8  -8   1    6.08    1.66
   7   8  -1    5.63    2.26
  -7  -8   1    6.08    1.67
   6   8  -1  177.20    4.14
  -6  -8   1  176.90    3.67
   5   8  -1   81.13    2.61
  -5  -8   1   85.51    2.39
   4   8  -1   73.58    2.13
   3   8  -1    4.72    1.46
  -2  -8   1    6.90    1.22
   1   8  -1  213.53    4.65
  -1  -8   1  207.09    4.66
   0   8  -1   53.43    2.62
   0  -8   1   52.88    2.69
  -1   8  -1  145.95    1.87
   1  -8   1  146.63    2.00
  -2   8  -1   24.89    0.99
   2  -8   1   24.28    0.91
  -3   8  -1    1.32    0.84
   3  -8   1    2.39    0.83
  -4   8  -1   12.07    0.98
  -5   8  -1   16.06    0.85
  -6   8  -1   36.49    1.47
  -7   8  -1   17.02    1.14
  -8   8  -1    3.99    0.91
  -9   8  -1  277.71    8.13
 -10   8  -1   88.73    2.43
 -11   8  -1    1.35    0.95
 -12   8  -1   51.98    2.90
 -13   8  -1   10.63    1.28
 -14   8  -1    1.78    1.37
 -15   8  -1   -0.30    1.42
 -16   8  -1   18.55    3.07
 -16   8  -1   17.09    2.29
 -17   8  -1   22.18    2.07
 -18   8  -1    0.07    2.28
 -18   8  -1    0.11    2.75
 -19   8  -1    0.91    2.60
 -19   8  -1   -0.75    2.98
 -14  -7   1   10.74    2.70
  13   7  -1    3.40    3.84
 -13  -7   1    2.68    2.32
  12   7  -1    1.92    3.29
 -12  -7   1    1.90    2.06
  11   7  -1   20.46    3.20
 -11  -7   1   18.96    1.85
  10   7  -1    5.74    3.15
   9   7  -1   22.05    2.90
  -9  -7   1   19.96    1.76
   8   7  -1    6.49    2.38
  -8  -7   1    7.52    1.61
   7   7  -1    2.66    1.84
  -7  -7   1    2.83    1.21
   6   7  -1    5.48    1.86
  -6  -7   1    7.01    1.34
   5   7  -1    0.58    1.57
  -5  -7   1    2.18    1.16
   4   7  -1  231.78    4.41
  -4  -7   1  235.31    4.18
   3   7  -1   14.65    2.24
  -3  -7   1   11.67    1.90
   2   7  -1   29.20    1.81
  -2  -7   1   28.03    1.60
   1   7  -1  120.54    4.13
  -1  -7   1  118.79    4.12
   0   7  -1   23.79    1.17
   0   7  -1   24.59    1.46
   0  -7   1   23.61    1.32
  -1   7  -1  126.99    1.70
   1  -7   1  125.26    1.69
  -2   7  -1    5.85    0.91
   2  -7   1    6.38    0.93
  -3   7  -1    3.64    0.72
  -4   7  -1   75.39    1.74
  -4   7  -1   72.36    1.54
  -5   7  -1   10.64    0.63
  -6   7  -1   26.49    1.10
  -7   7  -1    9.26    1.25
  -8   7  -1  177.57    4.85
  -9   7  -1  229.87    7.71
 -10   7  -1    2.97    1.02
 -11   7  -1   13.45    1.41
 -12   7  -1   92.70    3.43
 -13   7  -1    5.52    1.36
 -14   7  -1    1.30    1.46
 -15   7  -1    1.96    1.44
 -16   7  -1   16.87    2.08
 -16   7  -1   18.87    2.66
 -17   7  -1    2.55    2.34
 -17   7  -1    3.67    2.10
 -18   7  -1    2.13    2.38
 -18   7  -1    0.76    2.69
 -19   7  -1   11.08    3.20
 -19   7  -1   14.19    2.89
 -15  -6   1    3.60    2.83
 -14  -6   1    4.61    2.39
 -13  -6   1   11.84    2.23
  12   6  -1    2.02    3.18
 -12  -6   1    0.53    1.95
  11   6  -1   13.67    3.13
 -11  -6   1   11.47    1.87
  10   6  -1   23.52    3.07
 -10  -6   1   23.61    2.00
   9   6  -1    6.38    2.39
  -9  -6   1    6.59    1.46
   8   6  -1   55.27    2.53
  -8  -6   1   56.88    1.80
   7   6  -1  134.33    2.54
  -7  -6   1  133.25    2.05
   6   6  -1    7.54    1.59
  -6  -6   1    8.03    1.05
   5   6  -1  153.66    2.56
  -5  -6   1  157.06    2.05
   4   6  -1  338.32    8.07
  -4  -6   1  338.04    7.84
   3   6  -1   14.18    2.00
  -3  -6   1   10.95    1.54
   2   6  -1   41.36    0.52
  -2  -6   1   42.37    0.87
  -2  -6   1   41.02    0.62
   1   6  -1   30.64    0.90
  -1  -6   1   29.87    1.05
   0   6  -1    9.46    1.13
   0  -6   1    8.59    1.18
  -1   6  -1    9.00    1.32
   1  -6   1   10.74    1.35
  -2   6  -1   18.15    0.58
   2  -6   1   18.16    0.60
  -3   6  -1   48.44    2.49
  -3   6  -1   48.12    2.58
  -4   6  -1  300.39    8.69
  -5   6  -1  612.26   14.60
   5  -6   1  610.22   14.58
  -6   6  -1   21.73    1.11
  -7   6  -1  317.47    8.82
  -8   6  -1  164.51    5.04
  -9   6  -1   27.73    1.69
 -10   6  -1   38.99    1.66
 -11   6  -1  121.18    4.56
 -12   6  -1    6.81    1.12
 -13   6  -1   28.53    1.63
 -14   6  -1    2.15    1.34
 -15   6  -1    1.02    2.00
 -15   6  -1    1.63    1.56
 -16   6  -1    8.57    2.23
 -16   6  -1    8.24    1.85
 -17   6  -1    1.69    1.86
 -17   6  -1    3.21    2.48
 -18   6  -1    3.37    2.37
 -18   6  -1    1.28    2.70
 -15  -5   1    2.24    2.58
 -14  -5   1    5.14    2.31
 -13  -5   1    9.11    1.96
  12   5  -1    2.23    3.05
  11   5  -1    8.38    2.94
 -11  -5   1    4.34    1.61
  10   5  -1   14.52    2.44
 -10  -5   1   12.63    1.47
   9   5  -1    8.76    2.20
  -9  -5   1   10.58    1.32
   8   5  -1   14.69    1.92
  -8  -5   1   14.82    1.14
   7   5  -1    0.20    1.78
  -7  -5   1    1.27    1.03
   6   5  -1  184.65    3.26
  -6  -5   1  184.06    2.76
   5   5  -1   25.66    1.51
  -5  -5   1   26.57    1.12
  -4  -5   1   11.31    1.11
   3   5  -1   68.52    1.25
  -3  -5   1   70.35    1.09
   2   5  -1   75.08    1.49
   2   5  -1   73.66    1.11
  -2  -5   1   74.22    1.46
  -2  -5   1   73.80    1.30
   1   5  -1 1160.05   27.65
   1   5  -1 1166.06   27.75
  -1  -5   1 1168.98   27.71
   0   5  -1  106.82    3.83
   0  -5   1  105.11    3.89
  -1   5  -1    5.57    0.71
   1  -5   1    6.17    0.71
  -2   5  -1  181.20    9.45
   2  -5   1  179.05    9.44
  -3   5  -1   47.39    1.02
  -4   5  -1    4.79    0.45
   4  -5   1    4.39    0.39
  -5   5  -1  319.65    8.27
   5  -5   1  318.50    8.25
  -6   5  -1  139.40    2.03
  -7   5  -1  251.65    6.79
  -8   5  -1    0.17    0.64
  -9   5  -1   91.35    2.24
 -10   5  -1   45.06    2.36
 -11   5  -1    0.35    0.96
 -12   5  -1    8.65    1.52
 -13   5  -1    4.47    1.22
 -14   5  -1    2.93    1.49
 -14   5  -1    1.40    1.71
 -15   5  -1    0.11    1.54
 -15   5  -1    0.19    1.78
 -16   5  -1   10.08    2.06
 -16   5  -1    9.73    2.49
 -17   5  -1    2.51    2.05
 -17   5  -1    6.11    2.55
 -18   5  -1   13.10    2.79
 -18   5  -1   13.37    2.45
 -16  -4   1    0.34    2.45
 -15  -4   1   -0.35    2.47
 -14  -4   1   19.06    2.39
 -13  -4   1   13.64    2.16
 -12  -4   1    0.25    1.47
  11   4  -1    1.93    2.45
 -11  -4   1    3.16    1.45
  10   4  -1   64.08    2.66
 -10  -4   1   62.73    1.54
   9   4  -1    7.90    2.15
  -9  -4   1    7.68    1.20
   8   4  -1   20.95    2.19
  -8  -4   1   20.28    1.33
   7   4  -1    4.52    1.80
  -7  -4   1    2.53    1.02
   6   4  -1   89.02    2.77
  -6  -4   1   87.53    2.23
  -4  -4   1    5.96    1.09
   3   4  -1   83.26    0.62
   3   4  -1   82.86    1.02
  -3  -4   1   82.82    0.69
   2   4  -1  613.71    9.63
   2   4  -1  616.72    9.77
  -2  -4   1  615.39    9.66
  -2  -4   1  614.04    9.76
   1   4  -1  483.36   12.08
   1   4  -1  494.82   12.19
  -1  -4   1  488.22   12.12
   0   4  -1  836.61   19.51
   0  -4   1  833.08   19.52
  -1   4  -1   56.68    1.39
   1  -4   1   55.52    1.37
  -3   4  -1 1589.47   45.42
   3  -4   1 1596.43   45.41
  -4   4  -1  304.94   13.21
   4  -4   1  306.38   13.21
  -5   4  -1  546.35   11.61
   5  -4   1  541.04   11.60
  -7   4  -1    1.58    0.64
  -8   4  -1  283.21    6.96
  -9   4  -1    0.91    0.74
 -10   4  -1  296.15    7.07
 -11   4  -1    1.33    0.94
 -12   4  -1    1.94    1.07
 -13   4  -1    6.86    1.75
 -13   4  -1    5.49    1.47
 -14   4  -1    9.40    1.56
 -14   4  -1    7.67    1.83
 -15   4  -1    5.97    1.68
 -16   4  -1   38.98    3.52
 -16   4  -1   41.15    3.20
 -17   4  -1   27.05    3.07
 -17   4  -1   27.93    2.87
 -18   4  -1    7.29    2.78
 -18   4  -1    5.65    2.42
 -16  -3   1   -0.15    2.23
 -15  -3   1   17.60    2.37
 -14  -3   1    6.73    2.05
 -13  -3   1   38.31    1.99
 -12  -3   1   17.05    1.63
  11   3  -1   19.42    2.43
 -11  -3   1   21.36    1.45
 -10  -3   1   96.45    2.97
   9   3  -1    2.18    1.80
  -9  -3   1    1.68    1.00
   8   3  -1   60.60    2.14
  -8  -3   1   59.96    1.27
   7   3  -1    0.24    1.50
  -7  -3   1    0.44    0.82
  -6  -3   1    5.82    0.74
   5   3  -1  398.49    7.85
  -5  -3   1  398.41    7.61
   4   3  -1  801.62   19.95
  -4  -3   1  805.00   19.96
  -4  -3   1  827.32   20.11
   3   3  -1  916.59   25.94
   3   3  -1  945.11   25.83
  -3  -3   1  938.33   25.84
  -3  -3   1  907.92   25.92
   2   3  -1  337.63   13.15
  -2  -3   1  346.33   13.26
  -2  -3   1  339.22   13.16
   1   3  -1  622.93   15.89
   1   3  -1  625.93   15.81
  -1  -3   1  624.38   15.82
  -1  -3   1  623.21   15.89
   0   3  -1  284.96    3.70
   0  -3   1  283.86    3.72
  -1   3  -1  955.45   11.74
   1  -3   1  948.17   11.74
  -2   3  -1    5.49    0.29
   2  -3   1    5.37    0.27
  -3   3  -1  238.52    5.19
   3  -3   1  239.83    5.19
  -4   3  -1  146.19    5.35
   4  -3   1  151.19    5.35
  -5   3  -1  106.26    1.57
   5  -3   1  106.33    1.54
  -6   3  -1  371.34   10.50
  -7   3  -1  877.37   22.27
  -8   3  -1    0.84    0.67
  -9   3  -1   20.23    0.84
 -10   3  -1   39.31    2.21
 -11   3  -1   22.43    1.58
 -12   3  -1    9.54    1.20
 -12   3  -1    8.83    1.43
 -13   3  -1    0.09    1.22
 -13   3  -1    0.73    1.56
 -14   3  -1    8.88    1.73
 -14   3  -1    8.86    1.59
 -15   3  -1    9.75    2.19
 -15   3  -1    8.23    1.80
 -16   3  -1    2.46    2.28
 -16   3  -1    2.29    1.97
 -17   3  -1   25.17    2.87
 -17   3  -1   23.03    2.49
 -18   3  -1    2.12    2.43
 -17  -2   1    2.01    2.60
 -16  -2   1    8.84    2.29
 -15  -2   1   14.30    2.18
 -14  -2   1    7.14    1.98
 -13  -2   1   27.14    1.73
 -12  -2   1    2.07    1.40
 -11  -2   1    3.39    1.25
 -10  -2   1  132.11    2.26
   9   2  -1   23.59    1.74
   8   2  -1    5.09    1.67
  -8  -2   1    6.59    1.06
   7   2  -1  100.85    2.30
  -7  -2   1  100.70    1.56
   6   2  -1   59.61    2.47
  -6  -2   1   56.94    1.81
   3   2  -1   67.98    4.81
   3   2  -1   61.88    4.64
  -3  -2   1   61.51    4.65
   2   2  -1  105.09    0.90
  -2  -2   1  104.24    0.81
   1   2  -1  269.92    2.97
  -1  -2   1  265.83    3.06
  -1  -2   1  269.92    2.98
   0   2  -1  223.85    1.68
  -1   2  -1   34.30    0.19
  -2   2  -1   28.95    0.19
   2  -2   1   29.07    0.19
  -3   2  -1  370.93   13.62
   3  -2   1  374.62   13.62
  -4   2  -1   34.33    1.98
   4  -2   1   32.14    1.96
  -5   2  -1    0.27    0.40
   5  -2   1    0.28    0.38
  -6   2  -1   26.68    1.76
  -7   2  -1   58.76    1.51
  -8   2  -1    3.70    0.79
  -9   2  -1  106.39    3.18
 -10   2  -1   15.67    1.75
 -10   2  -1   15.96    1.72
 -11   2  -1    1.16    1.11
 -11   2  -1    2.18    1.25
 -12   2  -1   37.31    2.62
 -12   2  -1   37.89    2.71
 -13   2  -1    0.73    1.35
 -13   2  -1    1.53    1.57
 -14   2  -1    2.08    1.85
 -14   2  -1    2.17    1.51
 -15   2  -1   -0.12    1.68
 -15   2  -1    1.73    1.97
 -16   2  -1   22.60    2.40
 -16   2  -1   22.76    2.45
 -17   2  -1    0.75    2.27
 -18   2  -1   13.27    2.86
 -17  -1   1    4.51    2.54
 -16  -1   1    4.14    2.29
 -15  -1   1   -0.23    1.91
 -14  -1   1    8.14    1.75
 -13  -1   1   48.82    2.86
 -12  -1   1   21.82    1.48
 -11  -1   1   31.54    1.21
 -10  -1   1   25.46    1.41
   9   1  -1   22.75    3.02
  -9  -1   1   19.23    2.04
   8   1  -1  107.70    2.84
  -8  -1   1  111.72    2.16
   7   1  -1   37.59    1.66
  -7  -1   1   36.72    1.04
   6   1  -1  101.98    2.03
  -6  -1   1  101.17    1.66
  -6  -1   1  101.48    1.41
   5   1  -1   36.04    1.71
  -5  -1   1   39.06    1.96
  -5  -1   1   35.73    1.71
   4   1  -1  615.67   21.93
   4   1  -1  611.05   21.81
  -4  -1   1  600.88   21.80
  -4  -1   1  610.64   21.90
   3   1  -1   88.50    3.62
   3   1  -1   91.08    3.47
  -3  -1   1   89.20    3.47
  -3  -1   1   88.88    3.60
   2   1  -1  164.41    6.96
   2   1  -1  159.48    6.87
  -2  -1   1  155.06    6.86
  -2  -1   1  163.64    6.95
  -2   1  -1  125.85    3.36
   2  -1   1  124.17    3.36
  -3   1  -1    6.20    0.76
   3  -1   1    6.29    0.77
  -4   1  -1  817.07   19.63
  -4   1  -1  787.07   19.52
   4  -1   1  804.46   19.52
  -5   1  -1  140.70    4.24
  -5   1  -1  140.13    4.41
   5  -1   1  145.24    4.25
  -6   1  -1  174.88    3.53
  -7   1  -1   25.30    1.25
  -8   1  -1  389.48    8.87
  -8   1  -1  385.08    8.87
  -9   1  -1   65.10    3.14
  -9   1  -1   64.95    3.17
 -10   1  -1    0.55    1.11
 -10   1  -1    0.98    0.92
 -11   1  -1   69.51    2.70
 -11   1  -1   71.70    2.79
 -12   1  -1   16.30    1.81
 -12   1  -1   14.43    1.63
 -13   1  -1    0.27    1.40
 -13   1  -1    0.74    1.56
 -14   1  -1   16.20    1.82
 -14   1  -1   17.53    1.95
 -15   1  -1    6.93    1.80
 -15   1  -1    5.85    2.05
 -16   1  -1    5.69    2.19
 -17   1  -1    1.36    2.49
 -17   0   1    2.89    2.35
 -16   0   1    1.79    2.08
 -15   0   1   36.68    2.00
 -14   0   1    1.13    1.58
 -13   0   1  138.28    4.20
 -13   0   1  137.79    4.26
 -12   0   1    4.40    1.22
 -12   0   1    4.20    1.25
 -11   0   1   43.59    2.12
 -10   0   1  147.55    2.68
 -10   0   1  147.52    3.47
  -9   0   1  104.85    2.68
  -9   0   1   99.25    3.20
  -8   0   1   17.29    0.73
  -8   0   1   18.05    1.33
   7   0  -1  593.48   11.15
  -7   0   1  585.13   11.02
  -7   0   1  585.18   10.86
   6   0  -1   18.56    1.17
  -6   0   1   18.17    0.70
  -6   0   1   18.18    1.04
   5   0  -1   41.32    1.47
   4   0  -1  325.76   11.39
   4   0  -1  325.90   11.26
  -4   0   1  332.93   11.36
  -4   0   1  325.02   11.26
  -4   0   1  325.29   11.35
   3   0  -1  171.74    3.65
   3   0  -1  171.57    3.76
  -3   0   1  174.04    3.76
  -3   0   1  171.39    3.66
  -3   0   1  172.45    3.75
   2   0  -1  187.93    5.11
   2   0  -1  186.61    5.06
   2   0  -1  188.62    5.12
  -2   0   1  185.54    5.06
  -2   0   1  187.62    5.11
  -2   0   1  188.73    5.13
   1   0   1   57.89    0.13
  -2   0  -1  436.60   12.17
  -2   0  -1  423.60   12.12
   2   0   1  423.44   12.11
   2   0   1  425.10   12.10
  -3   0  -1   88.51    1.47
  -3   0  -1   89.53    1.32
  -3   0  -1   89.55    1.33
   3   0   1   89.89    1.31
  -4   0  -1  408.41   10.18
  -4   0  -1  406.64   10.28
  -4   0  -1  409.06   10.18
   4   0   1  415.23   10.18
  -5   0  -1   40.84    0.53
  -5   0  -1   40.68    0.83
  -5   0  -1   40.63    0.53
   5   0   1   40.37    0.44
  -6   0  -1   76.61    1.83
  -6   0  -1   76.13    1.82
  -7   0  -1  142.29    2.27
  -7   0  -1  142.80    2.27
  -8   0  -1   76.99    2.98
  -8   0  -1   74.84    2.98
  -9   0  -1    1.83    0.96
  -9   0  -1    1.88    0.90
 -10   0  -1   32.11    1.25
 -10   0  -1   32.12    1.21
 -11   0  -1  151.13    3.85
 -11   0  -1  148.50    3.83
 -12   0  -1    6.27    1.49
 -12   0  -1    7.44    1.37
 -13   0  -1    0.08    1.51
 -14   0  -1    4.71    1.88
 -15   0  -1    2.07    1.99
 -16   0  -1    6.90    2.02
 -17   0  -1   17.45    2.66
 -18   1   1    3.56    2.60
 -17   1   1    2.02    2.24
 -16   1   1   23.09    2.24
 -16   1   1   20.74    2.03
 -15   1   1    0.32    1.80
 -15   1   1    0.79    1.66
 -14   1   1    0.96    1.57
 -14   1   1    0.77    1.38
 -13   1   1   16.30    1.95
 -13   1   1   13.57    1.80
 -12   1   1   69.71    2.84
 -11   1   1   39.67    1.17
 -10   1   1   73.88    3.16
  -9   1   1    1.06    1.56
  -9   1   1    0.50    0.74
  -8   1   1  143.60    3.80
  -8   1   1  144.18    4.24
  -7   1   1  272.67    9.13
  -6   1   1   18.60    1.46
   5  -1  -1  252.40    6.22
  -5   1   1  252.72    6.35
  -5   1   1  254.09    6.23
   4  -1  -1  742.31    8.46
  -4   1   1  739.76    8.46
  -4   1   1  744.07    8.56
   3  -1  -1   19.77    0.43
  -3   1   1   19.93    0.44
   2  -1  -1   21.13    0.15
  -2   1   1   21.58    0.31
  -2   1   1   21.30    0.42
  -2   1   1   21.28    0.16
  -1  -1  -1  125.65    0.93
  -1  -1  -1  125.25    0.96
   1   1   1  126.19    0.93
   1   1   1  125.47    0.97
  -2  -1  -1  119.28    0.82
   2   1   1  119.22    0.79
   4   1   1  751.11   15.48
   4   1   1  765.90   15.35
  -5  -1  -1   50.14    1.12
   5   1   1   52.43    1.68
  -6  -1  -1  108.82    5.11
   6   1   1  101.57    5.37
  -7  -1  -1   10.41    0.86
  -8  -1  -1    1.20    0.85
  -9  -1  -1   71.19    1.91
 -10  -1  -1   11.79    1.27
 -11  -1  -1  126.34    2.79
 -12  -1  -1   16.63    1.77
 -13  -1  -1   24.03    1.93
 -14  -1  -1    6.54    1.89
 -15  -1  -1   19.51    2.26
 -16  -1  -1    6.22    2.24
 -17  -1  -1    0.56    2.56
 -18   2   1    0.76    2.38
 -17   2   1    4.02    2.53
 -17   2   1    2.96    2.05
 -16   2   1   -0.28    2.00
 -16   2   1   -0.19    1.67
 -15   2   1   13.95    2.23
 -15   2   1   12.40    2.00
 -14   2   1    3.71    1.46
 -14   2   1    3.46    1.71
 -13   2   1   59.95    3.10
 -12   2   1   42.89    1.37
 -11   2   1   21.27    1.14
 -10   2   1  232.04    5.61
  -9   2   1   18.91    0.78
  -8   2   1  247.86    6.93
  -7   2   1   36.56    1.98
  -6   2   1   84.54    3.23
   5  -2  -1  809.02   28.56
  -5   2   1  793.76   28.56
  -5   2   1  835.84   28.67
   4  -2  -1  440.29   20.69
  -4   2   1  435.92   20.70
   3  -2  -1  713.43   14.48
  -3   2   1  706.37   14.49
   2  -2  -1    1.23    0.23
  -2   2   1    1.45    0.60
  -2   2   1    1.27    0.23
   1  -2  -1   29.75    2.20
   1  -2  -1   29.91    2.10
  -1   2   1   29.60    2.19
  -1   2   1   30.20    2.10
   0  -2  -1  886.68   16.94
   0  -2  -1  876.37   16.92
   0   2   1  888.91   16.95
   1   2   1   11.61    0.89
   1   2   1   11.78    0.99
  -2  -2  -1   59.23    0.63
  -2  -2  -1   58.18    0.49
   2   2   1   58.47    0.44
   2   2   1   58.94    0.68
  -3  -2  -1  139.25    6.63
  -3  -2  -1  138.28    6.54
   3   2   1  138.74    6.52
   3   2   1  135.50    6.64
  -4  -2  -1    8.15    0.97
  -4  -2  -1    7.04    0.69
   4   2   1    8.41    1.09
  -5  -2  -1    6.04    1.02
   5   2   1    6.11    1.46
  -6  -2  -1  182.36    3.66
   6   2   1  179.06    4.05
  -7  -2  -1   38.42    1.21
   7   2   1   38.39    1.78
  -8  -2  -1   72.24    2.22
  -9  -2  -1   21.09    1.15
 -10  -2  -1   97.66    1.78
 -11  -2  -1    4.76    1.43
 -12  -2  -1    4.36    1.42
 -13  -2  -1    9.08    1.71
 -14  -2  -1   15.12    1.85
 -15  -2  -1    5.01    2.34
 -16  -2  -1    5.97    2.51
 -18   3   1    0.66    2.37
 -18   3   1    0.79    2.52
 -17   3   1    2.78    2.35
 -17   3   1    2.84    2.10
 -16   3   1    2.29    1.90
 -16   3   1    0.30    1.96
 -15   3   1    9.66    1.72
 -15   3   1   11.37    2.06
 -14   3   1   30.96    1.77
 -13   3   1  133.19    3.76
 -12   3   1   46.89    2.16
 -11   3   1    4.25    1.14
 -10   3   1    0.08    0.83
  -9   3   1    1.88    0.76
  -8   3   1  324.65    7.84
  -7   3   1  100.55    2.83
  -6   3   1  260.46    6.44
  -6   3   1  252.14    6.55
   5  -3  -1  221.70    6.07
  -5   3   1  221.59    6.08
   4  -3  -1   23.67    0.80
  -4   3   1   23.08    0.82
   3  -3  -1  898.78   21.03
  -3   3   1  885.28   21.03
  -2   3   1  592.33   14.53
   1  -3  -1  181.10    4.21
  -1   3   1  184.45    4.22
  -1   3   1  187.12    4.34
   0  -3  -1   91.98    0.79
   0   3   1   91.38    0.69
   0   3   1   91.96    0.93
   0   3   1   92.26    0.72
  -1  -3  -1   43.45    0.95
  -1  -3  -1   44.19    0.99
   1   3   1   43.27    1.02
  -2  -3  -1    9.17    0.99
  -2  -3  -1   11.19    1.11
  -3  -3  -1   27.69    0.78
   3   3   1   28.03    0.73
   4   3   1   59.38    2.65
  -5  -3  -1    2.62    0.88
  -6  -3  -1   12.28    0.82
   6   3   1   13.31    1.37
  -7  -3  -1    5.00    0.88
   7   3   1    4.04    1.54
  -8  -3  -1   93.74    1.97
   8   3   1   90.80    2.49
  -9  -3  -1   38.42    2.24
   9   3   1   34.72    2.80
 -10  -3  -1   18.19    1.26
 -11  -3  -1   12.01    1.76
 -12  -3  -1   38.40    2.21
 -13  -3  -1   28.97    2.07
 -14  -3  -1   25.66    2.53
 -15  -3  -1    1.09    2.42
 -16  -3  -1    4.53    2.67
 -18   4   1    1.05    2.19
 -18   4   1    0.12    2.48
 -17   4   1    1.32    2.09
 -17   4   1    3.70    2.37
 -16   4   1   21.42    2.21
 -16   4   1   22.27    2.51
 -15   4   1    7.13    1.51
 -14   4   1    2.16    1.41
 -13   4   1    1.40    1.15
 -12   4   1    7.34    1.55
 -11   4   1   62.71    2.66
 -10   4   1    7.52    1.33
  -9   4   1  130.36    4.37
  -8   4   1  222.95    8.12
  -7   4   1  160.41    3.36
  -6   4   1    6.09    0.73
   5  -4  -1    9.38    0.71
  -5   4   1   10.04    0.74
   4  -4  -1   21.50    0.60
  -4   4   1   22.08    0.58
   2  -4  -1  362.80    9.04
  -2   4   1  364.88    9.05
   1  -4  -1 1492.56   40.94
  -1   4   1 1496.00   40.95
  -1   4   1 1537.89   41.05
   0  -4  -1  332.24   12.61
   0   4   1  321.41   12.57
   0   4   1  336.84   12.54
   0   4   1  337.18   12.64
  -1  -4  -1    5.44    0.83
   1   4   1    5.88    0.82
  -2  -4  -1   26.45    1.49
  -2  -4  -1   27.76    1.51
   2   4   1   28.51    1.40
   2   4   1   27.77    1.61
  -3  -4  -1    5.59    1.28
   3   4   1    6.81    1.31
  -4  -4  -1  252.09    4.76
   4   4   1  247.01    4.93
  -6  -4  -1    3.22    1.07
   6   4   1    4.13    1.67
  -7  -4  -1  124.59    2.50
   7   4   1  120.81    3.08
  -8  -4  -1   26.97    1.32
  -9  -4  -1   13.38    1.50
   9   4   1   12.85    2.40
 -10  -4  -1    1.29    1.45
  10   4   1    1.91    2.45
 -11  -4  -1   42.89    1.90
 -12  -4  -1   30.70    2.07
 -13  -4  -1   24.90    2.08
 -14  -4  -1    5.34    2.39
 -15  -4  -1    0.59    2.49
 -19   5   1    3.56    2.49
 -19   5   1    0.46    2.78
 -18   5   1   -0.34    2.23
 -18   5   1   -0.64    2.48
 -17   5   1    1.41    2.00
 -17   5   1   -0.13    2.21
 -16   5   1   94.84    4.08
 -15   5   1    9.96    1.71
 -14   5   1    2.48    1.29
 -13   5   1    3.72    1.19
 -12   5   1   10.49    1.27
 -11   5   1    2.10    0.96
 -10   5   1    3.30    0.86
  -9   5   1  250.28    7.77
  -8   5   1  310.28   10.53
  -7   5   1  103.63    3.61
  -6   5   1   75.53    3.66
   5  -5  -1   20.39    0.80
  -5   5   1   19.89    0.87
  -4   5   1  118.10    1.84
  -3   5   1   30.12    2.19
   2  -5  -1  321.44   10.71
  -2   5   1  324.66   10.72
   1  -5  -1  940.85   24.35
  -1   5   1  944.26   24.45
  -1   5   1  925.73   24.35
   0  -5  -1  224.72    3.70
   0   5   1  224.92    3.62
   0   5   1  226.50    3.58
   0   5   1  227.24    3.72
  -1  -5  -1   58.08    0.76
  -1  -5  -1   57.93    0.86
   1   5   1   58.61    0.86
   1   5   1   58.53    0.68
  -2  -5  -1   21.42    0.79
  -2  -5  -1   21.93    0.82
  -3  -5  -1  118.01    2.64
   3   5   1  120.63    2.84
  -4  -5  -1   72.53    1.73
   4   5   1   70.97    2.02
  -5  -5  -1   75.23    1.32
  -6  -5  -1  131.90    2.00
   6   5   1  131.12    2.39
  -7  -5  -1    2.27    1.19
   7   5   1    2.44    1.90
  -8  -5  -1    6.96    1.36
   8   5   1    7.47    2.14
  -9  -5  -1   47.42    1.49
   9   5   1   47.35    2.43
 -10  -5  -1    4.23    1.57
  10   5   1    3.30    2.52
 -11  -5  -1  127.82    3.86
 -12  -5  -1    0.48    1.86
 -13  -5  -1   10.03    2.28
 -14  -5  -1    1.77    2.68
 -15  -5  -1    3.76    2.74
 -19   6   1   -0.40    2.37
 -19   6   1   -0.40    2.79
 -18   6   1    1.68    2.30
 -17   6   1    6.01    1.88
 -16   6   1   53.49    3.36
 -15   6   1   12.31    1.45
 -14   6   1  108.90    4.11
 -13   6   1   14.26    1.42
 -12   6   1   66.02    2.19
 -11   6   1    0.79    0.93
 -10   6   1    9.23    0.98
  -9   6   1   46.38    2.21
  -8   6   1    3.87    0.71
  -7   6   1  208.18    6.47
  -6   6   1  197.39    4.72
  -5   6   1   30.92    0.99
  -4   6   1  100.12    1.99
  -4   6   1   96.90    1.80
   3  -6  -1   79.80    1.77
  -3   6   1   78.67    1.76
  -2   6   1   78.10    0.81
  -2   6   1   77.89    1.08
  -1   6   1   59.45    1.02
  -1   6   1   59.78    0.85
   0  -6  -1    3.66    1.09
   0   6   1    3.69    0.88
   0   6   1    4.64    1.08
   0   6   1    4.74    0.93
  -1  -6  -1   53.27    1.59
   1   6   1   52.95    1.65
  -2  -6  -1  150.38    2.07
  -3  -6  -1  103.77    2.74
   3   6   1  108.68    2.98
  -4  -6  -1   38.66    1.46
   4   6   1   37.44    1.71
  -5  -6  -1  149.15    1.87
   5   6   1  150.41    2.47
  -6  -6  -1    0.80    1.22
   6   6   1    0.25    1.79
  -7  -6  -1    9.91    1.48
  -8  -6  -1   37.77    1.44
   8   6   1   39.53    2.40
  -9  -6  -1   60.76    1.95
   9   6   1   60.90    2.90
 -10  -6  -1   26.57    1.86
  10   6   1   24.95    2.85
 -11  -6  -1   34.74    1.91
  11   6   1   36.80    3.27
 -12  -6  -1    7.20    2.05
 -13  -6  -1    4.28    2.49
 -14  -6  -1    6.59    2.88
 -19   7   1    2.22    2.56
 -19   7   1    2.32    2.98
 -18   7   1    2.03    2.81
 -18   7   1    4.30    2.17
 -17   7   1    0.10    1.79
 -16   7   1   13.62    1.74
 -15   7   1   22.99    1.68
 -14   7   1   62.45    3.81
 -13   7   1   10.47    1.70
 -12   7   1   34.04    2.29
 -11   7   1    0.56    0.89
 -10   7   1    4.08    0.90
  -9   7   1   40.68    1.67
  -8   7   1    2.90    0.84
  -7   7   1   50.12    1.41
  -6   7   1   23.67    1.11
  -5   7   1   11.57    0.90
  -4   7   1  212.76    3.82
   3  -7  -1   59.11    2.52
   2  -7  -1    1.74    0.90
  -2   7   1    0.01    1.21
  -2   7   1    0.64    0.63
   1  -7  -1  178.72    4.56
  -1   7   1  180.01    4.69
   0  -7  -1    0.99    1.05
   0   7   1    1.73    0.93
   0   7   1    1.67    1.16
  -1  -7  -1   19.77    1.07
   1   7   1   20.45    1.03
   1   7   1   20.63    0.97
  -2  -7  -1   14.39    1.13
   2   7   1   15.79    1.22
   2   7   1   15.70    1.11
  -3  -7  -1  377.30    5.82
   3   7   1  376.13    5.88
  -5  -7  -1    7.26    1.17
   5   7   1    8.00    1.61
  -6  -7  -1    4.01    1.40
   6   7   1    5.14    2.08
  -7  -7  -1   57.10    1.79
   7   7   1   58.06    2.44
  -8  -7  -1    8.65    1.55
   8   7   1    8.88    2.48
  -9  -7  -1   30.52    2.05
   9   7   1   34.12    3.17
 -10  -7  -1    7.89    2.10
  10   7   1    7.79    3.19
 -11  -7  -1    5.63    2.30
  11   7   1    4.47    3.28
 -12  -7  -1   12.82    2.55
 -13  -7  -1    6.21    2.63
 -14  -7  -1    0.27    2.94
 -19   8   1    0.05    2.05
 -19   8   1    0.85    2.93
 -18   8   1   11.30    2.43
 -17   8   1    1.30    1.68
 -16   8   1    4.14    1.56
 -15   8   1    3.64    1.57
 -14   8   1    8.28    1.38
 -13   8   1   13.80    1.32
 -12   8   1    1.07    1.09
 -11   8   1   51.37    2.04
 -10   8   1   18.19    1.20
  -9   8   1   19.61    1.11
  -8   8   1  196.12    7.05
  -7   8   1    7.78    0.74
  -6   8   1  611.71   14.26
  -5   8   1    0.77    0.56
   3  -8  -1   52.30    2.32
   2  -8  -1    7.15    1.05
  -2   8   1    4.72    1.40
   1  -8  -1    9.91    1.33
  -1   8   1    8.98    1.41
   0  -8  -1    0.74    1.16
   0   8   1    0.61    1.02
   0   8   1    0.95    1.21
  -1  -8  -1   47.06    2.50
   1   8   1   48.47    2.47
  -2  -8  -1  119.84    1.58
   2   8   1  120.36    1.57
   2   8   1  118.28    1.54
   3   8   1    0.64    1.51
  -4  -8  -1   46.61    2.04
  -5  -8  -1    8.86    1.42
   5   8   1   12.72    2.09
   6   8   1   10.27    2.10
  -7  -8  -1    3.49    1.71
   7   8   1    5.79    2.44
  -8  -8  -1    1.98    1.96
   8   8   1    0.05    2.65
  -9  -8  -1    0.20    1.97
   9   8   1    1.25    3.12
 -10  -8  -1   -0.22    2.02
  10   8   1    1.18    3.39
 -11  -8  -1   17.76    2.52
  11   8   1   14.53    3.54
 -12  -8  -1   -0.19    2.67
 -13  -8  -1    0.77    2.86
 -19   9   1    6.73    2.25
 -18   9   1    1.43    1.99
 -17   9   1    1.83    1.87
 -16   9   1    5.51    1.76
 -15   9   1   26.49    2.72
 -14   9   1   30.71    1.88
 -13   9   1    5.86    1.23
 -12   9   1  151.48    4.94
 -11   9   1    3.71    0.93
 -10   9   1    0.57    0.97
  -9   9   1   23.32    1.32
  -8   9   1   59.56    2.59
  -7   9   1  104.14    3.31
  -6   9   1  525.76   11.29
  -5   9   1   36.85    1.82
   4  -9  -1   31.74    2.08
   3  -9  -1   22.04    1.02
   2  -9  -1   90.27    1.62
   1  -9  -1    3.77    1.26
  -1   9   1    4.32    1.14
   0  -9  -1  317.35    6.58
   0   9   1  307.37    6.64
   0   9   1  312.52    6.41
  -1  -9  -1   58.91    1.44
   1   9   1   59.40    1.34
   1   9   1   60.62    1.56
  -2  -9  -1   39.06    1.66
   2   9   1   39.81    1.74
  -3  -9  -1   75.02    3.57
   3   9   1   77.42    3.64
  -4  -9  -1    8.91    1.84
   4   9   1    8.18    2.02
  -5  -9  -1   77.21    2.08
  -6  -9  -1   34.35    1.80
   6   9   1   35.14    2.37
  -7  -9  -1    3.99    1.78
   7   9   1    4.76    2.62
  -8  -9  -1   19.26    2.25
   8   9   1   17.67    2.94
  -9  -9  -1    1.16    2.14
   9   9   1    4.36    3.44
 -10  -9  -1    7.60    2.38
  10   9   1    8.95    3.66
 -11  -9  -1   37.65    2.90
  11   9   1   38.19    4.03
 -12  -9  -1   23.62    3.01
 -19  10   1    2.33    2.13
 -18  10   1   10.44    2.36
 -17  10   1    0.31    1.76
 -16  10   1    1.44    1.74
 -15  10   1   83.52    3.59
 -14  10   1   21.13    2.19
 -13  10   1    0.65    1.21
 -12  10   1    6.38    1.20
 -11  10   1    1.06    1.03
 -10  10   1    7.33    0.98
  -9  10   1  142.50    4.95
  -8  10   1    7.83    0.92
  -7  10   1  161.51    2.82
  -6  10   1   27.44    0.86
  -5  10   1   20.74    1.16
   4 -10  -1   23.09    1.17
   3 -10  -1  570.51    8.56
   2 -10  -1    4.85    1.29
   1 -10  -1  291.92    7.06
  -1  10   1  285.89    6.86
   0 -10  -1    4.57    1.44
   0  10   1    5.33    1.32
  -1 -10  -1   65.80    1.81
   1  10   1   64.17    1.80
   1  10   1   63.19    1.53
  -2 -10  -1    5.87    1.79
   2  10   1    7.13    1.74
   2  10   1    8.41    1.85
  -3 -10  -1   22.80    1.80
   3  10   1   21.76    1.90
  -4 -10  -1   16.54    1.97
  -5 -10  -1  122.86    2.11
   5  10   1  125.37    2.43
  -6 -10  -1    2.78    2.03
   6  10   1    1.35    2.57
   7  10   1    5.69    3.00
  -8 -10  -1    1.88    2.40
   8  10   1    3.84    3.31
   9  10   1    7.10    3.75
 -10 -10  -1    4.59    2.60
  10  10   1    5.52    3.95
 -11 -10  -1   -0.73    2.87
  11  10   1   -0.40    4.25
 -12 -10  -1    9.84    3.19
 -19  11   1    1.38    2.22
 -18  11   1    6.02    2.19
 -17  11   1   12.09    2.19
 -16  11   1   11.63    1.76
 -15  11   1    2.45    1.60
 -14  11   1   40.67    2.88
 -13  11   1   68.55    3.15
 -12  11   1    4.06    1.22
 -11  11   1   80.65    2.55
 -10  11   1    7.28    1.07
  -9  11   1  258.37    7.83
  -8  11   1  135.42    3.66
  -7  11   1   34.47    0.96
  -6  11   1    1.15    0.80
   4 -11  -1  189.94    2.84
   3 -11  -1  278.38    4.38
   2 -11  -1   -0.33    1.28
   1 -11  -1   25.04    1.64
  -1  11   1   24.30    1.50
   0 -11  -1  149.38    3.48
   0  11   1  144.92    3.11
  -1 -11  -1   12.99    1.80
   1  11   1   12.92    1.64
  -2 -11  -1   -0.31    1.67
   2  11   1    1.16    1.91
   2  11   1   -0.39    2.00
  -3 -11  -1    3.14    1.94
   3  11   1    2.89    2.22
  -4 -11  -1    0.08    2.01
   4  11   1    2.78    2.36
  -5 -11  -1    7.25    2.10
   5  11   1    7.85    2.54
  -6 -11  -1    4.48    2.35
   6  11   1    4.00    2.78
  -7 -11  -1    8.91    2.46
   7  11   1   10.78    3.26
  -8 -11  -1   84.79    3.27
   8  11   1   84.36    3.97
  -9 -11  -1   -0.73    2.83
   9  11   1   -1.01    3.90
 -10 -11  -1   -0.67    3.09
  10  11   1    3.79    4.59
 -11 -11  -1   -0.04    3.19
  11  11   1    3.41    4.88
 -19  12   1    1.30    2.17
 -18  12   1    3.04    2.15
 -17  12   1   12.66    2.38
 -16  12   1    0.86    1.59
 -15  12   1   10.00    1.82
 -14  12   1    0.63    1.35
 -13  12   1   19.47    1.85
 -12  12   1   14.81    1.22
 -11  12   1    6.48    1.21
 -10  12   1    7.29    1.16
  -9  12   1    1.71    1.07
  -8  12   1    6.63    0.90
  -7  12   1   12.47    1.04
  -6  12   1    3.08    0.89
   4 -12  -1    5.72    1.64
   3 -12  -1  123.25    2.90
   2 -12  -1   53.41    2.13
  -2  12   1   53.07    2.18
   1 -12  -1  113.21    3.44
  -1  12   1  112.91    3.23
   0 -12  -1  187.39    2.40
   0  12   1  188.02    2.76
   1  12   1   50.90    2.00
  -2 -12  -1   43.88    2.40
   2  12   1   42.88    2.31
  -3 -12  -1   38.76    2.30
  -4 -12  -1   21.16    2.67
   4  12   1   21.98    2.80
  -5 -12  -1   -0.58    2.35
   5  12   1    2.35    2.80
  -6 -12  -1   13.85    2.47
   6  12   1   13.84    3.12
  -7 -12  -1   18.00    2.88
   7  12   1   19.23    3.69
  -8 -12  -1   32.40    3.09
   8  12   1   30.44    4.06
  -9 -12  -1    5.85    3.27
   9  12   1    8.36    4.54
 -10 -12  -1    2.84    3.37
  10  12   1    5.23    4.96
 -18  13   1    3.63    2.11
 -17  13   1   22.17    2.41
 -16  13   1    1.56    1.67
 -15  13   1    2.52    1.66
 -14  13   1    7.71    1.51
 -13  13   1    1.08    1.41
 -12  13   1    5.90    1.26
 -11  13   1    2.12    1.22
 -10  13   1    2.57    1.24
  -9  13   1   16.72    1.25
  -8  13   1    2.34    1.10
  -7  13   1   41.70    1.54
  -6  13   1    2.05    0.87
   4 -13  -1    3.26    1.77
   3 -13  -1   31.79    1.99
   2 -13  -1   13.92    1.71
  -2  13   1   14.21    1.77
   1 -13  -1  143.96    2.92
  -1  13   1  147.51    3.15
   0 -13  -1    1.54    2.00
   0  13   1    3.34    1.93
  -1 -13  -1   14.18    2.30
   1  13   1   12.31    2.35
  -2 -13  -1   28.27    2.42
   2  13   1   25.73    2.40
  -3 -13  -1   11.00    2.53
   3  13   1    9.44    2.77
  -4 -13  -1    3.08    2.53
   4  13   1    3.33    2.86
  -5 -13  -1   24.24    2.75
   5  13   1   23.64    3.07
  -6 -13  -1   37.51    2.78
   6  13   1   37.34    3.44
  -7 -13  -1    2.24    3.33
   7  13   1   -0.61    3.86
  -8 -13  -1    0.48    3.28
   8  13   1   -0.53    4.17
   9  13   1    1.25    4.82
 -18  14   1   12.18    2.38
 -17  14   1    3.73    2.01
 -16  14   1   -0.39    1.74
 -15  14   1   40.93    2.56
 -14  14   1   21.50    2.01
 -13  14   1    1.76    1.49
 -12  14   1    2.02    1.29
 -11  14   1    1.10    1.27
 -10  14   1   25.51    1.58
  -9  14   1   80.02    2.88
  -8  14   1    6.10    1.18
  -7  14   1   10.71    1.03
  -6  14   1   40.31    1.49
   5 -14  -1   14.05    1.74
   4 -14  -1    2.20    1.76
   3 -14  -1    1.91    1.84
   2 -14  -1   31.53    2.15
  -2  14   1   33.64    2.28
   1 -14  -1    9.54    2.06
  -1  14   1   10.72    2.17
   0 -14  -1    4.31    2.14
  -1 -14  -1   66.83    2.88
   1  14   1   64.39    2.64
  -2 -14  -1   -0.60    2.40
   2  14   1    0.05    2.65
  -3 -14  -1    7.15    2.71
   3  14   1    6.21    2.98
  -4 -14  -1    6.92    2.85
   4  14   1    8.23    3.35
  -5 -14  -1    6.85    2.97
   5  14   1    9.96    3.45
  -6 -14  -1   22.73    3.46
   6  14   1   20.66    3.75
  -7 -14  -1    4.50    3.38
   7  14   1    9.12    4.15
  -8 -14  -1    6.19    3.99
   8  14   1    4.90    4.82
 -18  15   1    1.21    2.09
 -17  15   1   11.12    2.22
 -16  15   1    1.13    1.78
 -15  15   1   47.80    3.13
 -14  15   1    4.49    1.55
 -13  15   1    6.32    1.46
 -12  15   1    1.25    1.40
 -11  15   1   76.63    2.81
 -10  15   1    2.55    1.36
  -9  15   1   79.96    2.95
  -8  15   1   35.65    2.28
  -7  15   1    1.65    1.18
  -6  15   1   27.48    1.32
   5 -15  -1    6.73    1.90
   4 -15  -1   59.84    2.49
   3 -15  -1   24.17    2.00
  -3  15   1   25.45    2.37
   2 -15  -1   38.36    2.36
  -2  15   1   39.70    2.59
   1 -15  -1   15.89    2.29
  -1  15   1   14.95    2.36
   0 -15  -1    4.58    2.41
  -1 -15  -1   -0.54    2.33
   1  15   1    0.64    2.76
  -2 -15  -1    0.26    2.74
   2  15   1   -0.70    2.83
  -3 -15  -1    4.79    3.13
   3  15   1    4.95    3.35
  -4 -15  -1   -0.67    2.88
   4  15   1   -0.82    3.47
  -5 -15  -1   -0.81    3.29
   5  15   1    4.40    3.85
  -6 -15  -1    3.05    3.74
   6  15   1    4.82    4.24
  -7 -15  -1    2.42    3.58
   7  15   1    2.89    4.61
 -17  16   1    5.87    2.15
 -16  16   1    1.87    1.96
 -15  16   1   15.01    1.98
 -14  16   1    3.55    1.70
 -13  16   1    2.83    1.63
 -12  16   1   67.76    2.97
 -11  16   1   20.51    1.72
 -10  16   1   10.65    1.58
  -9  16   1    6.60    1.29
  -8  16   1    0.94    1.33
  -7  16   1   15.37    1.55
  -6  16   1    0.32    1.27
   5 -16  -1    1.03    2.18
   4 -16  -1   40.68    2.71
   3 -16  -1   20.92    2.33
  -3  16   1   23.75    2.60
   2 -16  -1   24.72    2.63
  -2  16   1   27.38    2.78
   1 -16  -1    9.94    2.58
  -1  16   1   10.48    2.72
   0 -16  -1   51.10    2.85
   0  16   1   50.57    3.07
  -1 -16  -1    0.26    2.72
   1  16   1    1.84    3.15
  -2 -16  -1    0.56    2.87
   2  16   1   -0.48    3.31
  -3 -16  -1    7.37    3.23
   3  16   1    4.81    3.72
  -4 -16  -1    5.78    3.68
   4  16   1    3.10    3.76
  -5 -16  -1    3.12    3.68
   5  16   1    3.02    4.07
  -6 -16  -1    0.27    4.09
   6  16   1    0.06    4.70
 -17  17   1    5.86    2.22
 -16  17   1    2.78    1.92
 -15  17   1   12.01    2.13
 -14  17   1    8.03    2.01
 -13  17   1   18.74    1.80
 -12  17   1   35.41    2.19
 -11  17   1    6.76    1.76
 -10  17   1   11.58    1.54
  -9  17   1    0.37    1.28
  -8  17   1    6.89    1.42
  -7  17   1   23.57    1.56
   5 -17  -1   18.61    2.44
   4 -17  -1   25.02    2.78
  -4  17   1   23.08    3.00
   3 -17  -1   35.28    2.97
  -3  17   1   36.90    3.19
   2 -17  -1   12.90    2.80
  -2  17   1   15.44    3.05
   1 -17  -1    1.55    2.66
  -1  17   1    1.36    3.02
   0 -17  -1   19.95    3.13
   0  17   1   19.48    3.19
  -1 -17  -1    3.09    3.18
  -2 -17  -1   -0.78    3.17
   2  17   1    4.75    3.95
  -3 -17  -1    0.94    3.43
   3  17   1    1.25    3.93
  -4 -17  -1    2.08    3.66
   4  17   1    0.14    4.28
  -5 -17  -1    1.47    3.99
   5  17   1    1.96    4.77
 -16  18   1    1.46    2.08
 -15  18   1    2.61    2.01
 -14  18   1    7.03    2.03
 -13  18   1    0.93    1.83
 -12  18   1    2.45    1.76
 -11  18   1   13.26    1.82
 -10  18   1   13.91    1.86
  -9  18   1    5.69    1.60
  -8  18   1    6.81    1.51
  -7  18   1    8.02    1.54
   5 -18  -1    1.44    2.61
   4 -18  -1   37.57    3.09
  -4  18   1   40.21    3.57
   3 -18  -1    0.73    2.98
  -3  18   1    0.96    3.20
   2 -18  -1    3.96    3.03
  -2  18   1    4.74    3.28
   1 -18  -1   29.51    3.25
  -1  18   1   30.30    3.46
   0 -18  -1    7.05    3.32
   0  18   1   10.62    3.61
   1  18   1    4.31    4.32
   1  18   1    4.01    3.71
  -2 -18  -1    1.78    3.66
   2  18   1    0.20    4.22
  -3 -18  -1    6.98    3.81
   3  18   1    8.26    4.52
 -15  19   1    1.23    2.16
 -14  19   1   15.37    2.16
 -13  19   1    1.29    1.90
 -12  19   1    2.32    1.91
 -11  19   1    0.71    1.71
 -10  19   1    2.86    1.72
  -9  19   1   12.14    1.89
  -8  19   1    3.71    1.77
  -7  19   1    2.91    1.81
  -6  19   1    2.10    1.74
   5 -19  -1    3.50    2.88
  -5  19   1    3.33    3.52
   4 -19  -1   15.65    3.17
  -4  19   1   14.52    3.57
   3 -19  -1    2.67    2.92
  -3  19   1    3.46    3.36
   2 -19  -1   24.62    3.11
  -2  19   1   27.82    3.54
   1 -19  -1    9.07    3.47
  -1  19   1    7.54    3.74
   0 -19  -1   -0.63    3.43
   0  19   1   -0.74    3.83
  -1 -19  -1    2.48    3.87
   1  19   1    5.38    4.23
  -2 -19  -1    4.24    4.37
   2  19   1    2.27    4.72
 -14  20   1   -0.14    2.04
 -13  20   1    2.68    2.06
 -12  20   1    3.44    1.98
 -11  20   1    4.18    2.04
 -10  20   1    6.15    1.93
  -9  20   1    2.89    1.88
  -8  20   1    1.05    1.90
  -7  20   1   -0.48    1.83
  -6  20   1    6.19    4.15
  -5  20   1   -0.74    3.95
   4 -20  -1    0.40    3.41
  -4  20   1   -0.85    3.67
   3 -20  -1   15.26    3.29
  -3  20   1   21.00    3.95
   2 -20  -1   16.00    3.77
  -2  20   1   17.59    3.88
   1 -20  -1    7.57    4.00
  -1  20   1    4.20    4.06
   0 -20  -1    1.66    3.77
   0  20   1    1.55    4.18
 -13  21   1    2.52    2.20
 -12  21   1    1.23    2.11
 -11  21   1   10.58    2.22
 -10  21   1    3.93    2.09
  -9  21   1    3.18    2.01
  -8  21   1    4.12    2.12
  -7  21   1    6.57    2.16
  -6  21   1    9.50    4.33
  -5  21   1    1.50    4.15
   4 -21  -1    5.45    3.68
  -4  21   1    1.16    4.08
   3 -21  -1    1.17    3.94
  -3  21   1    0.07    4.07
   2 -21  -1    5.86    3.94
  -2  21   1   10.78    4.44
 -10  22   1    0.25    2.26
  -9  22   1    0.47    2.15
  -8  22   1    2.15    2.29
  -7  22   1    2.89    2.29
  -7  22   1   -0.02    4.75
  -6  22   1    1.27    4.84
  -6  22   1    0.01    2.26
  -8  23  -2    1.99    2.14
  -2  22  -2   14.12    4.26
  -3  22  -2    1.70    4.76
  -3  22  -2    2.16    3.84
   3 -22   2    1.97    3.72
  -4  22  -2    1.84    4.72
  -4  22  -2    4.92    3.95
  -5  22  -2    8.22    4.58
  -5  22  -2    7.38    3.95
  -5  22  -2   11.26    2.19
  -6  22  -2    2.61    4.54
  -6  22  -2    4.66    2.12
  -7  22  -2    3.66    2.10
  -8  22  -2    2.32    2.02
  -9  22  -2    7.15    2.03
 -10  22  -2    0.98    2.10
 -11  22  -2    0.65    2.19
 -12  22  -2    3.68    2.21
   0  21  -2   -1.10    4.71
   0 -21   2    0.46    3.75
  -1  21  -2    7.83    4.48
  -1  21  -2    7.75    3.69
  -2  21  -2    8.07    4.42
   2 -21   2    4.65    3.44
  -3  21  -2    3.96    4.39
  -3  21  -2    5.53    3.68
   3 -21   2    3.89    3.22
  -4  21  -2    3.12    4.39
  -4  21  -2    5.69    3.60
   4 -21   2    4.71    3.10
  -5  21  -2   -0.45    4.40
  -6  21  -2    4.51    1.94
  -7  21  -2    1.19    1.97
  -8  21  -2    7.01    1.90
  -9  21  -2    0.61    1.76
 -10  21  -2   -0.25    1.77
 -11  21  -2    5.61    2.06
 -12  21  -2    2.41    2.12
 -13  21  -2    6.68    2.37
 -14  21  -2    0.55    2.29
  -2 -20   2    6.27    3.95
   1  20  -2    2.68    4.40
  -1 -20   2    2.54    3.75
   0  20  -2   14.83    3.41
   0  20  -2   14.99    4.16
   0 -20   2   12.64    3.58
  -1  20  -2    2.66    4.03
  -1  20  -2    2.89    3.56
   1 -20   2    2.82    3.54
  -2  20  -2    4.44    3.36
  -2  20  -2    3.94    3.90
   2 -20   2    3.76    3.43
  -3  20  -2   30.14    4.04
  -3  20  -2   24.86    3.27
   3 -20   2   27.30    3.23
  -4  20  -2    2.56    3.72
   4 -20   2    2.93    2.83
  -6  20  -2   29.05    1.92
  -7  20  -2   23.38    3.06
  -8  20  -2    0.95    1.66
  -9  20  -2    2.56    1.63
 -10  20  -2    1.24    1.80
 -11  20  -2    4.00    1.87
 -12  20  -2    1.55    1.99
 -13  20  -2    2.45    1.91
 -14  20  -2    0.37    2.15
 -15  20  -2    2.18    2.18
   3  19  -2    1.57    4.62
  -3 -19   2    1.94    3.97
   2  19  -2    3.97    4.04
  -2 -19   2    8.28    3.82
   1  19  -2    0.34    4.15
   1  19  -2    4.64    4.06
  -1 -19   2   -0.30    3.32
   0  19  -2   -0.50    3.69
   0  19  -2    2.31    2.97
   0 -19   2    2.85    3.31
  -1  19  -2   -0.41    2.98
  -1  19  -2    2.48    3.56
   1 -19   2    0.46    3.09
  -2  19  -2   36.04    2.95
  -2  19  -2   35.31    3.47
   2 -19   2   35.37    2.90
  -3  19  -2   10.97    3.55
   3 -19   2   13.55    2.97
  -4  19  -2    5.83    3.30
   4 -19   2    4.12    2.59
  -6  19  -2    8.46    1.58
  -7  19  -2    2.81    1.56
  -8  19  -2    3.11    1.47
  -9  19  -2    3.30    1.60
 -10  19  -2    1.83    1.73
 -11  19  -2   -0.24    1.71
 -12  19  -2    5.82    1.85
 -13  19  -2    0.83    1.83
 -14  19  -2    3.03    1.99
 -15  19  -2    1.47    1.99
 -16  19  -2   18.57    2.42
   5  18  -2    1.92    4.72
  -5 -18   2    1.30    4.21
   4  18  -2    4.93    4.46
  -4 -18   2    5.10    3.65
   3  18  -2    1.31    3.84
   2  18  -2   32.21    3.83
  -2 -18   2   28.25    3.34
   1  18  -2    4.75    3.54
   1  18  -2    6.68    2.62
  -1 -18   2    3.47    3.20
   0  18  -2    1.22    2.82
   0  18  -2    1.12    3.20
  -1  18  -2    4.14    3.22
   1 -18   2    3.42    2.80
  -2  18  -2   21.59    3.17
   2 -18   2   22.84    2.77
  -3  18  -2    0.52    2.95
   3 -18   2    0.69    2.29
   4 -18   2    6.22    2.46
  -6  18  -2   26.70    1.47
  -7  18  -2    8.95    1.42
  -8  18  -2    1.09    1.36
  -9  18  -2    0.98    1.44
 -10  18  -2    7.91    1.47
 -11  18  -2   17.14    1.84
 -12  18  -2    3.04    1.71
 -13  18  -2    2.22    1.79
 -14  18  -2    0.07    1.80
 -15  18  -2    0.99    1.92
 -16  18  -2    4.11    2.26
   6  17  -2   14.95    4.53
  -6 -17   2    7.57    3.97
   5  17  -2    5.28    4.21
  -5 -17   2    1.56    3.62
   4  17  -2    8.52    4.17
  -4 -17   2    7.18    3.64
  -3 -17   2   31.57    3.49
   2  17  -2    4.60    3.21
  -2 -17   2    4.73    2.70
   1  17  -2    7.32    2.45
   1  17  -2   10.59    3.13
  -1 -17   2    7.04    2.81
   0  17  -2    8.69    2.39
   0  17  -2    7.28    2.96
   0 -17   2    7.84    2.58
  -1  17  -2    1.54    2.85
  -1  17  -2    0.43    2.47
   1 -17   2    0.29    2.49
  -2  17  -2    1.81    2.81
   2 -17   2    0.98    2.49
  -3  17  -2   26.73    2.88
   3 -17   2   24.34    2.32
   4 -17   2    2.85    2.18
  -6  17  -2    2.17    1.32
  -7  17  -2    1.28    1.19
  -8  17  -2    0.09    1.29
  -9  17  -2    6.37    1.30
 -10  17  -2    5.18    1.43
 -11  17  -2   37.19    2.71
 -12  17  -2    4.68    1.66
 -13  17  -2    0.64    1.63
 -14  17  -2   -0.27    1.58
 -15  17  -2   10.29    2.04
 -16  17  -2    2.04    1.92
 -17  17  -2    1.76    2.10
   7  16  -2    0.40    4.25
  -7 -16   2   -0.19    3.60
   6  16  -2   -0.48    3.88
  -6 -16   2    0.90    3.59
   5  16  -2    1.79    3.94
  -5 -16   2    2.06    3.53
   4  16  -2    4.89    3.68
  -4 -16   2    5.34    3.26
   3  16  -2   18.04    3.10
  -3 -16   2   19.10    3.02
   2  16  -2    2.02    2.88
  -2 -16   2    0.23    2.74
   1  16  -2   35.19    2.93
   1  16  -2   33.68    2.34
  -1 -16   2   32.08    2.74
   0  16  -2    0.57    2.06
   0  16  -2    1.05    2.57
   0 -16   2    0.70    2.45
  -1  16  -2   34.82    2.62
   1 -16   2   33.89    2.24
  -2  16  -2   50.19    2.71
   2 -16   2   50.00    2.53
   3 -16   2    0.46    1.89
   4 -16   2    3.94    1.95
  -6  16  -2   54.74    2.16
  -7  16  -2    9.04    1.20
  -8  16  -2   10.12    1.32
  -9  16  -2    2.40    1.28
 -10  16  -2    3.02    1.41
 -11  16  -2   10.44    1.57
 -12  16  -2   18.21    1.80
 -13  16  -2    3.86    1.65
 -14  16  -2   21.92    2.00
 -15  16  -2    1.58    1.74
 -16  16  -2    1.44    1.97
 -17  16  -2    3.15    2.11
   8  15  -2    1.87    4.48
  -8 -15   2    1.97    3.66
   7  15  -2    9.41    3.90
  -7 -15   2    5.63    3.47
   6  15  -2    3.49    3.65
  -6 -15   2    6.28    3.64
   5  15  -2    3.27    3.61
   4  15  -2    1.19    3.08
  -4 -15   2    0.89    2.72
   3  15  -2    2.72    2.93
   2  15  -2    0.87    2.70
  -2 -15   2   -0.58    2.50
   1  15  -2   80.59    2.89
   1  15  -2   83.97    2.41
  -1 -15   2   79.67    2.68
   0  15  -2   53.09    2.88
   0  15  -2   54.53    2.48
   0 -15   2   51.11    2.68
  -1  15  -2    0.01    2.22
   1 -15   2   -0.47    1.94
  -2  15  -2   19.23    2.39
   2 -15   2   20.12    2.03
   3 -15   2   16.86    2.14
   4 -15   2   27.40    1.90
  -6  15  -2   16.07    1.18
  -7  15  -2    6.26    1.03
  -8  15  -2   15.53    1.90
  -9  15  -2   14.37    1.33
 -10  15  -2    1.64    1.24
 -11  15  -2   12.07    1.37
 -12  15  -2    3.39    1.38
 -13  15  -2   64.09    3.26
 -14  15  -2    3.38    1.54
 -15  15  -2    3.99    1.73
 -16  15  -2    1.04    1.82
 -17  15  -2   22.26    2.60
 -18  15  -2    4.69    3.38
 -18  15  -2    5.09    2.19
   9  14  -2    1.84    4.39
  -9 -14   2    0.66    3.75
   8  14  -2    6.88    3.91
  -8 -14   2    7.36    3.45
   7  14  -2    2.41    3.60
  -7 -14   2    2.28    3.06
   6  14  -2    3.91    3.32
  -6 -14   2    4.79    2.78
   5  14  -2    5.84    3.19
  -5 -14   2    4.50    2.70
   4  14  -2   25.24    2.94
  -4 -14   2   25.15    2.87
   3  14  -2    5.49    2.66
   2  14  -2   47.01    2.50
   2  14  -2   47.69    1.78
  -2 -14   2   46.15    2.39
   1  14  -2    7.10    1.81
   1  14  -2    8.51    2.37
  -1 -14   2    7.86    2.36
   0  14  -2    1.52    2.05
   0 -14   2    0.03    1.84
  -1  14  -2   60.69    3.09
   1 -14   2   57.80    2.63
   2 -14   2    1.39    1.69
   3 -14   2    3.84    1.51
   4 -14   2    2.41    1.44
  -5  14  -2  187.03    4.27
  -6  14  -2   74.95    2.05
  -7  14  -2    5.84    1.26
  -8  14  -2   26.58    1.28
  -9  14  -2   64.47    2.58
 -10  14  -2   22.05    1.45
 -11  14  -2    5.00    1.20
 -12  14  -2    4.11    1.50
 -13  14  -2    7.91    1.59
 -14  14  -2   18.75    2.13
 -15  14  -2   12.63    1.67
 -16  14  -2    3.22    1.84
 -17  14  -2   29.74    2.79
 -18  14  -2    2.70    2.10
 -18  14  -2   -0.27    3.24
  10  13  -2   14.93    4.56
 -10 -13   2   14.59    3.61
   9  13  -2    7.44    4.02
  -9 -13   2    7.41    3.07
   8  13  -2   22.81    3.62
  -8 -13   2   20.75    3.01
   7  13  -2   21.62    3.48
  -7 -13   2   18.57    2.96
   6  13  -2    3.70    3.17
  -6 -13   2    1.37    2.48
   5  13  -2    8.47    2.81
  -5 -13   2   10.36    2.53
   4  13  -2   14.42    2.45
  -4 -13   2   16.39    2.35
   3  13  -2   10.48    2.31
  -3 -13   2    9.52    2.18
   2  13  -2   20.12    2.07
   2  13  -2   18.55    1.96
   2  13  -2   19.24    1.44
  -2 -13   2   18.13    2.12
   1  13  -2    3.52    2.03
  -1 -13   2    3.20    2.04
   0  13  -2   10.26    1.95
   0 -13   2    9.07    1.80
  -1  13  -2    0.19    1.65
   1 -13   2    0.51    1.48
   2 -13   2   14.51    1.48
   3 -13   2   28.11    1.77
   4 -13   2    2.82    1.41
  -5  13  -2    9.59    0.81
  -6  13  -2   54.17    1.69
  -7  13  -2   10.95    0.97
  -8  13  -2   73.32    2.45
  -9  13  -2   23.89    1.91
 -10  13  -2    5.77    1.11
 -11  13  -2   36.68    1.82
 -12  13  -2   24.79    2.31
 -13  13  -2    2.98    1.37
 -14  13  -2   12.49    1.65
 -15  13  -2    0.37    1.51
 -16  13  -2   15.54    1.96
 -17  13  -2    2.98    3.03
 -17  13  -2    1.08    1.83
 -18  13  -2    2.03    1.91
 -18  13  -2   -0.62    3.14
  11  12  -2    1.68    4.55
 -11 -12   2    0.03    3.16
  10  12  -2    4.44    4.17
 -10 -12   2    3.96    3.14
   9  12  -2   25.00    3.80
   8  12  -2   14.45    3.22
  -8 -12   2   13.05    2.59
   7  12  -2    3.99    2.97
   6  12  -2   14.20    2.84
  -6 -12   2   11.76    2.22
   5  12  -2    0.65    2.44
  -5 -12   2    1.73    2.17
   4  12  -2   12.79    2.19
  -4 -12   2   13.61    2.18
   3  12  -2    7.60    2.01
  -3 -12   2    8.13    1.92
   2  12  -2  201.54    3.67
   2  12  -2  199.82    3.07
  -2 -12   2  201.77    3.88
   1  12  -2   86.05    2.68
   1  12  -2   81.90    3.11
  -1 -12   2   81.80    3.16
   0  12  -2   56.00    1.74
   0 -12   2   55.98    1.67
  -1  12  -2   10.93    1.94
   1 -12   2   10.65    1.76
   2 -12   2    6.55    1.58
   3 -12   2   14.24    1.37
  -5  12  -2   62.68    1.91
  -6  12  -2   12.87    1.04
  -7  12  -2    1.25    0.83
  -8  12  -2   16.28    1.13
  -9  12  -2   28.12    1.92
 -10  12  -2   58.36    2.54
 -11  12  -2   28.10    2.06
 -12  12  -2    3.21    1.31
 -13  12  -2    1.29    1.32
 -14  12  -2    3.49    1.43
 -15  12  -2    1.99    1.55
 -16  12  -2    0.99    1.70
 -17  12  -2    2.54    3.21
 -17  12  -2    2.53    1.90
 -18  12  -2    7.20    2.10
 -18  12  -2    5.44    3.11
  12  11  -2   -0.98    4.46
 -12 -11   2   -0.61    3.07
 -11 -11   2    2.40    2.83
  10  11  -2    2.55    3.72
 -10 -11   2    1.46    2.84
   9  11  -2   12.71    3.48
  -9 -11   2   13.78    2.61
   8  11  -2   14.53    3.06
  -8 -11   2   13.92    2.19
   7  11  -2    6.54    2.76
  -7 -11   2    0.90    2.13
   6  11  -2   33.77    2.58
  -6 -11   2   34.02    2.11
   5  11  -2    9.15    2.52
  -5 -11   2    5.57    1.85
   4  11  -2    2.42    1.99
  -4 -11   2    0.61    1.89
   3  11  -2   -0.34    1.82
  -3 -11   2    2.73    1.88
   2  11  -2    2.73    1.67
   2  11  -2    2.21    1.37
  -2 -11   2    2.90    1.71
   1  11  -2   12.63    1.53
  -1 -11   2   12.65    1.55
   0  11  -2   42.96    1.84
   0 -11   2   44.97    1.87
   1 -11   2   34.32    1.54
   2 -11   2    9.58    1.27
   3 -11   2   14.51    1.16
  -5  11  -2   23.77    1.15
  -6  11  -2  121.53    3.81
  -7  11  -2    6.79    0.82
  -8  11  -2   62.68    1.95
  -9  11  -2   32.93    1.96
 -10  11  -2   25.68    2.18
 -11  11  -2   96.96    3.43
 -12  11  -2    0.45    1.23
 -13  11  -2    1.49    1.31
 -14  11  -2    2.16    1.51
 -15  11  -2   19.32    1.86
 -16  11  -2    7.77    1.70
 -17  11  -2    2.93    1.91
 -17  11  -2    2.00    2.68
 -18  11  -2    2.56    1.99
 -18  11  -2    0.22    2.95
 -19  11  -2    1.50    2.14
 -19  11  -2   -0.37    3.08
  12  10  -2    5.41    4.25
 -12 -10   2    1.09    3.05
  11  10  -2   18.58    4.08
 -11 -10   2   17.42    2.81
  10  10  -2    3.38    3.50
 -10 -10   2    2.47    2.40
   9  10  -2    6.80    3.06
  -9 -10   2    6.19    2.04
   8  10  -2    2.63    2.70
  -8 -10   2    2.84    1.90
   7  10  -2    4.88    2.49
  -7 -10   2    4.37    1.86
   6  10  -2   43.46    2.46
  -6 -10   2   46.30    2.02
   5  10  -2   40.89    2.03
  -5 -10   2   40.38    1.61
   4  10  -2   -0.11    1.78
  -4 -10   2   -0.36    1.56
   3  10  -2   86.83    2.16
  -3 -10   2   90.16    2.10
   2  10  -2   34.55    1.99
   2  10  -2   33.45    2.29
  -2 -10   2   32.42    2.64
   1  10  -2  300.02    5.85
  -1 -10   2  301.02    5.87
   0  10  -2    6.62    1.31
   0 -10   2    5.55    1.25
   1 -10   2   26.27    1.51
   2 -10   2   13.03    1.16
   3 -10   2  323.40    5.33
  -4  10  -2   66.59    1.44
  -5  10  -2    1.33    0.62
  -6  10  -2  537.47   16.63
  -7  10  -2  382.53    9.89
  -8  10  -2   34.20    1.16
  -9  10  -2   20.82    1.77
 -10  10  -2   35.27    2.00
 -11  10  -2   18.34    1.40
 -12  10  -2   66.04    2.41
 -13  10  -2   93.37    4.23
 -14  10  -2   11.57    1.58
 -15  10  -2   35.20    2.14
 -16  10  -2   -0.09    2.43
 -16  10  -2    0.82    1.61
 -17  10  -2    4.81    2.78
 -17  10  -2    5.54    1.88
 -18  10  -2    0.25    1.83
 -18  10  -2    2.56    2.94
 -19  10  -2    0.65    3.16
 -19  10  -2    1.05    2.64
  13   9  -2   -0.62    4.11
 -13  -9   2    0.41    2.78
  12   9  -2    5.69    3.98
 -12  -9   2    1.97    2.58
  11   9  -2    0.54    3.67
 -11  -9   2    0.16    2.19
  10   9  -2    8.75    3.12
 -10  -9   2   10.41    2.22
   9   9  -2   12.28    2.84
  -9  -9   2   12.52    1.91
   8   9  -2   29.18    2.73
  -8  -9   2   26.10    1.77
   7   9  -2   19.08    2.34
  -7  -9   2   19.21    1.61
   6   9  -2   50.15    2.39
  -6  -9   2   50.68    1.73
   5   9  -2   75.77    2.33
  -5  -9   2   78.83    1.89
   4   9  -2   17.22    1.65
  -4  -9   2   15.73    1.25
   3   9  -2   65.43    2.25
  -3  -9   2   69.24    2.35
   2   9  -2   68.94    2.04
  -2  -9   2   68.01    2.54
   1   9  -2 1098.59   17.05
  -1  -9   2 1109.96   17.06
   0   9  -2  186.61    4.99
   0  -9   2  190.10    4.98
   1  -9   2    7.09    1.11
  -2   9  -2  174.82    2.35
   2  -9   2  179.81    2.38
  -3   9  -2  104.54    1.80
   3  -9   2  106.42    1.73
  -5   9  -2    6.80    0.63
  -6   9  -2   58.07    3.02
  -7   9  -2  687.78   17.74
  -8   9  -2   10.68    0.81
  -9   9  -2    0.77    0.79
 -10   9  -2    4.50    1.07
 -11   9  -2   87.24    2.58
 -12   9  -2    9.65    1.21
 -13   9  -2    7.17    1.54
 -14   9  -2   28.90    1.65
 -15   9  -2   42.75    3.85
 -15   9  -2   42.38    2.91
 -16   9  -2   12.68    2.78
 -16   9  -2   13.97    2.15
 -17   9  -2   11.10    2.03
 -17   9  -2   11.54    2.83
 -18   9  -2    1.00    2.87
 -18   9  -2   -0.13    2.25
 -19   9  -2    0.46    3.07
 -19   9  -2    4.03    2.70
 -14  -8   2   16.17    2.85
  13   8  -2    8.24    3.83
 -13  -8   2    8.92    2.58
  12   8  -2    4.81    3.75
 -12  -8   2    3.95    2.29
  11   8  -2    3.41    3.42
 -11  -8   2    2.03    2.07
  10   8  -2    4.66    3.04
   9   8  -2    3.02    2.57
  -9  -8   2    1.59    1.59
   8   8  -2   18.01    2.51
  -8  -8   2   18.22    1.69
   7   8  -2    7.08    2.15
  -7  -8   2    6.05    1.32
   6   8  -2   75.92    2.49
   5   8  -2   23.23    1.77
  -5  -8   2   22.43    1.18
   4   8  -2    6.76    1.77
   3   8  -2   46.96    1.85
  -3  -8   2   46.28    1.55
   2   8  -2   83.10    1.07
  -2  -8   2   82.33    1.31
   1   8  -2  340.94    5.41
  -1  -8   2  344.36    5.40
   0   8  -2   72.44    1.62
   0  -8   2   70.92    1.88
  -1   8  -2  127.18    2.52
   1  -8   2  126.37    2.54
  -2   8  -2   91.47    1.60
   2  -8   2   92.51    1.55
  -4   8  -2   25.01    1.10
  -5   8  -2   82.07    2.21
  -5   8  -2   84.71    2.11
  -6   8  -2  281.06    7.19
  -7   8  -2   68.05    2.11
  -8   8  -2    0.49    0.71
  -9   8  -2   26.40    1.75
 -10   8  -2  123.78    3.50
 -11   8  -2    5.18    1.05
 -12   8  -2    5.16    1.13
 -13   8  -2   35.20    1.62
 -14   8  -2    9.51    1.62
 -15   8  -2    3.53    1.43
 -15   8  -2    3.55    2.03
 -16   8  -2   23.84    2.01
 -16   8  -2   23.11    2.78
 -17   8  -2    2.27    1.97
 -17   8  -2    2.52    2.56
 -18   8  -2    6.22    2.37
 -18   8  -2    3.95    2.76
 -19   8  -2    1.21    3.06
 -19   8  -2   -0.61    2.45
 -14  -7   2   -0.58    2.50
  13   7  -2   -0.48    3.56
 -13  -7   2    0.32    2.40
  12   7  -2    5.98    3.35
 -12  -7   2    4.34    2.16
  11   7  -2    5.92    3.22
 -11  -7   2    6.56    1.81
  10   7  -2    8.06    3.04
 -10  -7   2    5.42    1.90
   9   7  -2    3.71    2.44
  -9  -7   2    2.69    1.46
   8   7  -2    3.32    2.18
  -8  -7   2    3.36    1.43
   7   7  -2    2.49    1.94
  -7  -7   2    2.87    1.23
  -6  -7   2   11.98    2.00
   5   7  -2    2.39    1.71
  -4  -7   2   49.56    1.29
   3   7  -2  249.39    4.79
  -3  -7   2  256.53    4.59
   2   7  -2   16.33    1.09
  -2  -7   2   15.42    0.91
   1   7  -2  328.00    5.11
   1   7  -2  328.95    4.88
  -1  -7   2  330.72    5.07
   0   7  -2   94.09    2.33
   0  -7   2   95.66    2.50
  -1   7  -2    5.42    0.69
   1  -7   2    4.79    0.72
  -2   7  -2  315.30    3.27
   2  -7   2  312.74    3.23
  -3   7  -2  131.93    4.57
  -3   7  -2  127.18    4.47
  -4   7  -2   10.85    1.10
  -5   7  -2  326.32   10.52
   5  -7   2  330.38   10.49
  -6   7  -2  132.65    5.13
  -7   7  -2  130.74    3.18
  -8   7  -2   39.35    1.86
  -9   7  -2  137.56    3.70
 -10   7  -2    0.56    0.87
 -11   7  -2   40.48    2.13
 -12   7  -2    5.48    1.24
 -13   7  -2   19.89    1.84
 -14   7  -2    9.47    1.43
 -14   7  -2    9.45    1.87
 -15   7  -2   94.19    4.04
 -15   7  -2   96.94    4.60
 -16   7  -2    1.29    1.78
 -16   7  -2    0.55    2.21
 -17   7  -2   12.69    2.60
 -17   7  -2   14.34    2.37
 -18   7  -2    2.22    2.25
 -18   7  -2    4.50    2.77
 -15  -6   2    4.18    2.65
 -14  -6   2    9.69    2.58
  13   6  -2   11.74    3.64
  12   6  -2   18.71    3.03
 -12  -6   2   20.47    1.95
  11   6  -2    0.19    2.71
 -11  -6   2    3.22    1.82
  10   6  -2   22.50    2.66
 -10  -6   2   22.80    1.59
   9   6  -2   32.74    2.40
  -9  -6   2   33.07    1.48
   8   6  -2   31.52    2.10
  -8  -6   2   30.19    1.22
   7   6  -2    4.66    1.85
  -7  -6   2    4.29    1.18
  -6  -6   2  122.65    4.24
   5   6  -2   27.51    1.56
  -5  -6   2   28.47    0.89
  -4  -6   2    7.58    0.98
  -3  -6   2   80.66    2.05
   2   6  -2  188.28    2.42
   2   6  -2  186.04    2.05
  -2  -6   2  185.73    2.20
   1   6  -2    5.50    0.84
   1   6  -2    5.09    1.08
   1   6  -2    5.67    0.83
  -1  -6   2    5.54    0.98
   0   6  -2  602.61   15.22
   0  -6   2  593.96   15.26
  -1   6  -2  347.34    8.37
   1  -6   2  349.00    8.36
  -2   6  -2   19.67    1.31
   2  -6   2   20.98    1.29
  -4   6  -2   34.56    2.23
   4  -6   2   34.32    2.19
  -5   6  -2    1.23    0.46
   5  -6   2    1.32    0.45
  -6   6  -2    1.11    0.51
  -7   6  -2  213.01    7.39
  -8   6  -2   18.23    1.04
  -9   6  -2   21.79    1.65
 -10   6  -2    2.53    0.99
 -11   6  -2   99.79    5.43
 -12   6  -2   13.23    1.20
 -13   6  -2   29.99    1.50
 -13   6  -2   28.34    1.88
 -14   6  -2   12.60    1.76
 -14   6  -2   15.60    1.50
 -15   6  -2   31.93    2.61
 -15   6  -2   29.04    3.35
 -16   6  -2    1.56    1.87
 -16   6  -2    3.31    2.32
 -17   6  -2    0.67    2.43
 -17   6  -2    1.81    2.10
 -18   6  -2   11.77    2.67
 -18   6  -2   13.42    2.98
 -15  -5   2    0.58    2.42
 -14  -5   2   41.88    2.69
  13   5  -2   31.97    3.22
 -13  -5   2   32.23    1.87
 -12  -5   2   16.83    1.80
  11   5  -2    5.04    2.63
 -11  -5   2    5.66    1.44
  10   5  -2   40.23    2.75
 -10  -5   2   42.72    1.64
   9   5  -2  124.31    2.87
  -9  -5   2  127.96    2.28
  -8  -5   2   69.46    1.97
   7   5  -2   86.56    2.90
  -7  -5   2   87.76    2.19
   6   5  -2   58.48    4.11
  -6  -5   2   56.11    3.58
   5   5  -2   76.87    1.83
  -5  -5   2   77.25    1.40
   3   5  -2  254.52    2.91
  -3  -5   2  254.44    2.97
   2   5  -2  108.43    3.46
  -2  -5   2  112.13    3.72
  -2  -5   2  108.49    3.52
   1   5  -2    6.35    0.69
   1   5  -2    7.25    0.66
  -1  -5   2    7.71    0.74
   0   5  -2   28.24    0.46
  -1   5  -2  127.11    4.08
   1  -5   2  127.37    4.06
  -2   5  -2   17.90    0.71
  -2   5  -2   17.49    0.54
  -3   5  -2 1227.01   34.89
   3  -5   2 1215.41   34.87
  -4   5  -2    1.95    0.35
   4  -5   2    1.61    0.30
  -5   5  -2  104.52    2.68
   5  -5   2  106.47    2.68
  -6   5  -2   82.95    2.55
  -7   5  -2  183.02    5.74
  -8   5  -2   39.88    1.36
  -9   5  -2    0.19    0.74
 -10   5  -2   27.60    1.30
 -11   5  -2  117.67    3.37
 -12   5  -2    3.16    1.11
 -12   5  -2    4.53    1.50
 -13   5  -2    6.87    1.61
 -13   5  -2    5.18    1.94
 -14   5  -2    1.07    1.81
 -14   5  -2    1.99    1.52
 -15   5  -2    3.62    1.62
 -15   5  -2    5.10    2.02
 -16   5  -2   32.73    2.67
 -16   5  -2   34.07    2.35
 -17   5  -2    2.39    2.43
 -17   5  -2    3.63    2.17
 -18   5  -2    6.71    2.68
 -18   5  -2    5.19    2.42
 -16  -4   2    2.24    2.49
 -15  -4   2   -0.13    2.16
 -14  -4   2   20.11    2.57
 -13  -4   2   62.39    2.56
  12   4  -2    4.18    2.62
 -12  -4   2    3.26    1.50
  11   4  -2   14.46    2.55
 -11  -4   2   16.39    1.47
  10   4  -2   23.01    2.25
 -10  -4   2   23.11    1.21
   9   4  -2   31.94    1.92
  -9  -4   2   34.68    1.17
   8   4  -2   23.04    1.95
  -8  -4   2   24.71    1.20
   7   4  -2  305.12    4.43
  -7  -4   2  310.74    3.93
   6   4  -2    5.52    1.58
  -6  -4   2    5.19    0.97
   5   4  -2 1359.05   28.84
  -5  -4   2 1373.14   28.66
   4   4  -2   10.98    1.11
  -4  -4   2   11.37    0.60
   3   4  -2  213.42    4.98
   3   4  -2  208.32    5.22
  -3  -4   2  213.29    5.01
  -3  -4   2  206.95    5.16
   2   4  -2   41.18    0.37
   2   4  -2   40.87    0.73
  -2  -4   2   40.83    0.44
  -2  -4   2   40.78    0.68
   1   4  -2   56.46    3.53
   1   4  -2   59.24    3.50
  -1  -4   2   60.26    3.55
   0   4  -2  248.09    6.54
   0   4  -2  244.21    6.57
   0  -4   2  241.57    6.57
  -1   4  -2  335.82    7.74
   1  -4   2  333.34    7.74
  -2   4  -2  262.14    6.78
   2  -4   2  259.27    6.77
  -4   4  -2  642.44   16.70
   4  -4   2  648.45   16.69
  -5   4  -2  129.97    3.55
   5  -4   2  126.69    3.52
  -7   4  -2   36.15    0.82
  -8   4  -2   61.95    2.50
  -9   4  -2    2.96    0.74
 -10   4  -2    4.95    1.36
 -10   4  -2    5.26    1.05
 -11   4  -2   11.53    1.19
 -11   4  -2   11.55    1.51
 -12   4  -2    2.70    1.09
 -12   4  -2    4.54    1.45
 -13   4  -2   32.85    1.90
 -13   4  -2   33.02    2.17
 -14   4  -2    0.95    1.38
 -14   4  -2    1.08    1.87
 -15   4  -2   13.67    1.67
 -15   4  -2   12.92    1.98
 -16   4  -2   10.65    2.10
 -16   4  -2    8.55    2.27
 -17   4  -2    5.24    2.10
 -17   4  -2    6.08    2.66
 -18   4  -2    2.88    3.02
 -18   4  -2   -0.13    2.43
 -16  -3   2    4.19    2.37
 -15  -3   2    4.47    2.08
 -14  -3   2    5.66    1.78
 -13  -3   2   14.89    1.66
  12   3  -2    4.16    2.65
 -12  -3   2    5.63    1.51
  11   3  -2    7.56    2.22
 -11  -3   2    7.82    1.25
  10   3  -2   24.00    2.19
 -10  -3   2   23.04    1.15
   9   3  -2    2.09    2.00
  -9  -3   2    2.46    1.07
   8   3  -2   69.33    2.19
  -8  -3   2   67.30    1.31
   7   3  -2    3.25    1.39
   6   3  -2  954.48   18.91
  -6  -3   2  952.92   18.67
  -5  -3   2   12.69    0.84
   4   3  -2  373.15   12.89
   4   3  -2  381.82   12.71
  -4  -3   2  387.03   12.72
   3   3  -2  246.64    6.31
   3   3  -2  247.89    6.14
  -3  -3   2  246.50    6.14
  -3  -3   2  245.16    6.28
   2   3  -2   58.52    2.41
  -2  -3   2   60.83    2.44
   1   3  -2  196.49    3.97
   1   3  -2  196.97    4.03
  -1  -3   2  196.86    4.01
  -1  -3   2  196.87    3.98
   0   3  -2   13.20    0.88
   0   3  -2   14.00    0.79
   0  -3   2   12.78    0.85
   0  -3   2   13.43    0.87
  -1   3  -2    2.41    0.28
  -1   3  -2    2.28    0.44
  -2   3  -2   28.22    0.87
   2  -3   2   28.49    0.86
  -3   3  -2  157.38    4.00
   3  -3   2  157.64    4.00
  -4   3  -2  739.50   20.91
   4  -3   2  728.34   20.90
  -5   3  -2  104.26    3.52
   5  -3   2  106.30    3.52
  -6   3  -2   59.05    1.57
  -7   3  -2   46.27    1.51
  -8   3  -2   72.48    1.90
  -8   3  -2   72.28    2.10
  -9   3  -2   21.62    1.81
  -9   3  -2   19.31    1.98
 -10   3  -2   10.29    1.57
 -10   3  -2    9.53    1.35
 -11   3  -2   29.78    1.41
 -11   3  -2   29.36    1.18
 -12   3  -2    9.06    1.51
 -12   3  -2    8.46    1.22
 -13   3  -2   12.54    1.63
 -13   3  -2   12.17    1.26
 -14   3  -2   13.86    1.72
 -14   3  -2   13.57    1.47
 -15   3  -2    5.31    1.75
 -16   3  -2   21.34    2.88
 -16   3  -2   24.14    3.85
 -17   3  -2    6.73    2.31
 -17   3  -2    6.84    2.60
 -18   3  -2    8.02    2.69
 -17  -2   2    4.96    2.48
 -16  -2   2   -0.44    2.11
 -15  -2   2    9.03    2.13
 -14  -2   2   27.86    1.86
 -13  -2   2   12.48    1.77
 -12  -2   2   26.86    1.98
  11   2  -2    3.84    2.26
 -11  -2   2    3.25    1.22
 -10  -2   2   98.04    1.51
   9   2  -2   14.72    2.04
  -9  -2   2   14.87    1.21
   8   2  -2    1.95    1.56
  -8  -2   2    2.25    0.75
   7   2  -2   15.81    1.34
  -7  -2   2   15.66    0.66
   6   2  -2  589.82   14.68
  -6  -2   2  581.00   14.43
   5   2  -2  685.17   20.59
  -5  -2   2  681.68   20.40
  -4  -2   2  173.23    3.03
  -4  -2   2  168.06    3.18
   3   2  -2  656.44   17.67
   3   2  -2  673.37   17.81
  -3  -2   2  667.83   17.78
  -3  -2   2  650.26   17.67
   2   2  -2  346.39    6.03
   2   2  -2  346.68    5.90
  -2  -2   2  345.27    6.00
  -2  -2   2  345.43    5.90
   1   2  -2   42.12    0.52
   1   2  -2   42.29    0.79
  -1  -2   2   42.28    0.76
  -1  -2   2   42.54    0.54
  -1  -2   2   42.53    0.66
   0   2  -2   37.82    2.19
   0  -2   2   37.60    2.19
   1  -2   2    7.69    0.78
   1  -2   2    7.31    0.65
  -2   2  -2  353.47    8.33
  -2   2  -2  353.18    8.26
   2  -2   2  354.19    8.26
  -3   2  -2  819.32   24.80
  -3   2  -2  842.07   24.87
   3  -2   2  834.31   24.80
  -4   2  -2   45.48    2.16
  -5   2  -2   42.04    1.38
   5  -2   2   43.15    1.38
  -6   2  -2    3.32    0.75
  -6   2  -2    3.41    0.58
  -7   2  -2  219.52    5.01
  -7   2  -2  220.36    4.93
  -8   2  -2   12.26    0.96
  -8   2  -2   11.67    0.83
  -9   2  -2  213.09    4.66
  -9   2  -2  213.98    4.60
 -10   2  -2  436.04   11.05
 -10   2  -2  439.53   10.98
 -11   2  -2  106.03    3.73
 -11   2  -2  102.53    3.56
 -12   2  -2   96.97    2.72
 -12   2  -2   97.41    2.87
 -13   2  -2   10.54    1.65
 -13   2  -2   12.03    1.95
 -14   2  -2    4.67    1.97
 -14   2  -2    3.85    1.57
 -15   2  -2    2.32    1.81
 -15   2  -2    2.01    2.19
 -16   2  -2   40.85    2.98
 -16   2  -2   45.12    3.88
 -17   2  -2    6.23    2.44
 -17  -1   2    2.00    2.39
 -16  -1   2    3.87    2.11
 -15  -1   2   12.89    1.87
 -14  -1   2    1.58    1.68
 -13  -1   2   18.70    1.91
 -12  -1   2   22.64    1.54
 -11  -1   2   23.61    1.20
  10   1  -2    0.24    1.80
 -10  -1   2    0.49    0.93
  -9  -1   2  148.06    3.08
   8   1  -2   39.74    2.88
  -8  -1   2   39.00    2.63
  -8  -1   2   39.58    2.19
   7   1  -2    0.38    1.32
  -7  -1   2   -0.06    0.62
  -7  -1   2    0.53    1.06
   6   1  -2  157.03    3.85
  -6  -1   2  153.24    3.48
  -6  -1   2  153.69    3.69
   5   1  -2  757.65   19.81
   5   1  -2  740.62   19.94
  -5  -1   2  753.46   19.90
  -5  -1   2  752.51   19.80
  -5  -1   2  737.67   19.91
   4   1  -2    3.92    0.73
   4   1  -2    3.51    0.34
  -4  -1   2    3.62    0.65
  -4  -1   2    3.76    0.69
  -4  -1   2    3.52    0.35
   3   1  -2  937.68   28.98
   3   1  -2  933.64   28.96
   3   1  -2  936.31   28.89
  -3  -1   2  917.03   28.89
  -3  -1   2  934.09   28.98
  -3  -1   2  939.45   28.97
   2   1  -2  156.74    1.41
   2   1  -2  156.95    1.11
   2   1  -2  157.55    1.31
  -2  -1   2  157.66    1.28
  -2  -1   2  156.59    1.12
   1   1  -2    1.90    0.10
   1   1  -2    1.76    0.31
  -1  -1   2    1.73    0.30
  -1   1  -2  220.52    8.93
  -1   1  -2  222.76    8.86
   1  -1   2  225.77    8.93
   1  -1   2  217.54    8.87
  -2   1  -2   67.00    1.18
  -2   1  -2   67.82    1.05
   2  -1   2   67.71    1.14
   2  -1   2   67.30    1.04
  -3   1  -2  254.61   10.34
  -3   1  -2  255.71   10.39
   3  -1   2  255.58   10.34
  -4   1  -2  425.19   11.25
  -4   1  -2  423.98   11.31
   4  -1   2  428.38   11.26
  -5   1  -2    1.81    0.45
  -5   1  -2    2.34    0.58
  -5   1  -2    1.94    0.83
   5  -1   2    2.23    0.47
  -6   1  -2   25.33    1.29
  -6   1  -2   26.67    1.39
  -7   1  -2  260.04    7.75
  -7   1  -2  258.48    7.70
  -8   1  -2    4.16    1.16
  -8   1  -2    5.22    1.05
  -9   1  -2    0.71    0.87
  -9   1  -2    0.26    1.00
 -10   1  -2   12.46    1.89
 -10   1  -2    9.51    1.40
 -11   1  -2   10.86    1.71
 -11   1  -2    9.63    1.61
 -12   1  -2   97.56    3.66
 -12   1  -2   98.75    3.63
 -13   1  -2   12.41    1.77
 -13   1  -2   13.33    1.61
 -14   1  -2    8.29    1.98
 -14   1  -2    7.52    1.67
 -15   1  -2    5.56    1.95
 -16   1  -2    2.54    2.20
 -17   1  -2    0.48    2.30
 -18   0   2    1.99    2.56
 -17   0   2   22.82    2.51
 -16   0   2    1.57    2.12
 -15   0   2    0.29    1.75
 -14   0   2   21.86    1.57
 -13   0   2   49.24    2.93
 -13   0   2   48.70    3.02
 -12   0   2   -0.17    1.12
 -11   0   2   19.97    1.18
 -10   0   2    3.72    0.87
 -10   0   2    3.44    1.96
  -9   0   2  105.19    3.78
  -9   0   2  104.15    4.33
   8   0  -2   58.84    1.86
  -8   0   2   57.21    1.40
  -8   0   2   57.74    1.78
   7   0  -2   43.48    1.45
  -7   0   2   42.18    0.82
  -7   0   2   42.11    1.34
  -6   0   2   22.07    1.88
   5   0  -2    2.22    0.44
  -5   0   2    2.11    0.47
  -5   0   2    2.61    0.85
   4   0  -2  115.97    5.08
   4   0  -2  114.28    4.92
  -4   0   2  116.21    5.11
  -4   0   2  111.19    4.92
  -4   0   2  116.82    5.04
   3   0  -2   33.14    2.73
   3   0  -2   33.53    2.86
   3   0  -2   33.38    2.90
  -3   0   2   33.21    2.73
  -3   0   2   32.70    2.92
  -3   0   2   33.10    2.83
   2   0  -2   90.65    1.11
   2   0  -2   91.42    0.94
   2   0  -2   90.83    0.80
  -2   0   2   91.01    0.81
  -1   0   2  189.51    1.00
   0   0  -2   35.65    0.99
  -1   0  -2    5.36    0.36
  -1   0  -2    4.79    0.48
   1   0   2    5.42    0.34
  -2   0  -2   26.08    0.27
  -2   0  -2   26.39    0.44
   2   0   2   26.46    0.37
  -3   0  -2  469.32   18.74
  -3   0  -2  481.54   18.79
   3   0   2  475.60   18.76
   3   0   2  474.45   18.74
  -4   0  -2  547.07   11.93
  -4   0  -2  548.10   11.96
  -4   0  -2  556.76   12.05
   4   0   2  539.78   11.93
  -5   0  -2  103.64    3.30
  -5   0  -2  104.18    3.34
  -6   0  -2    4.71    0.67
  -6   0  -2    4.69    0.72
  -7   0  -2   21.54    0.71
  -7   0  -2   22.11    0.85
  -8   0  -2   17.17    1.64
  -8   0  -2   16.65    1.55
  -9   0  -2   48.04    1.23
  -9   0  -2   48.31    1.32
 -10   0  -2    2.09    1.32
 -10   0  -2    2.19    1.13
 -11   0  -2   14.39    1.72
 -11   0  -2   12.81    1.50
 -12   0  -2   22.90    1.32
 -13   0  -2    2.11    1.63
 -14   0  -2    8.39    1.76
 -15   0  -2   41.04    2.22
 -16   0  -2    2.47    2.35
 -17   0  -2    1.56    2.77
 -18   1   2   30.04    2.90
 -17   1   2    3.23    2.21
 -16   1   2    2.73    1.96
 -15   1   2   39.34    2.18
 -14   1   2    3.67    1.41
 -13   1   2   18.82    1.97
 -12   1   2    1.75    1.19
 -11   1   2   16.83    1.13
 -10   1   2   12.85    1.04
  -9   1   2   20.89    1.89
  -9   1   2   21.50    1.16
  -8   1   2   78.02    1.62
  -8   1   2   76.00    2.32
  -7   1   2   69.21    2.56
  -7   1   2   73.91    3.09
  -6   1   2  238.21    6.37
  -6   1   2  240.39    6.12
   5  -1  -2    7.99    0.87
   5  -1  -2    9.51    1.31
  -5   1   2    7.53    1.15
  -5   1   2    9.26    1.42
  -5   1   2    8.26    0.91
   4  -1  -2  228.36    7.39
   4  -1  -2  237.49    7.53
  -4   1   2  226.30    7.39
  -4   1   2  234.56    7.60
  -4   1   2  234.66    7.49
   3  -1  -2    1.07    0.66
   3  -1  -2    0.69    0.25
   3  -1  -2    0.55    0.50
  -3   1   2    0.44    0.44
  -3   1   2    0.84    0.66
  -3   1   2    0.60    0.27
   2  -1  -2  140.56    4.01
   2  -1  -2  140.00    3.85
   2  -1  -2  143.57    3.82
  -2   1   2  138.38    3.85
  -2   1   2  141.19    3.82
  -2   1   2  142.31    4.02
   1  -1  -2  123.23    6.67
   1  -1  -2  127.38    6.81
  -1   1   2  126.83    6.68
  -1   1   2  127.10    6.81
   0  -1  -2    2.97    0.35
   0  -1  -2    3.07    0.58
   0   1   2    2.54    0.31
   0   1   2    2.56    0.50
  -1  -1  -2  340.07    6.89
  -1  -1  -2  337.20    6.87
   1   1   2  338.52    6.89
   1   1   2  340.68    6.87
  -2  -1  -2   46.03    0.53
   2   1   2   45.97    0.48
   2   1   2   46.00    0.55
  -3  -1  -2  604.29   12.10
  -3  -1  -2  592.44   12.02
   3   1   2  595.46   12.00
   3   1   2  602.31   12.11
   3   1   2  597.28   12.01
  -4  -1  -2   18.36    1.27
  -4  -1  -2   19.67    1.51
   4   1   2   18.90    1.22
   4   1   2   17.47    1.19
  -5  -1  -2   92.11    2.56
  -5  -1  -2   92.34    2.54
  -6  -1  -2  431.78    9.58
  -7  -1  -2   62.48    1.78
  -7  -1  -2   62.08    1.80
  -8  -1  -2    8.38    0.89
  -9  -1  -2   14.66    1.46
 -10  -1  -2   55.49    2.42
 -11  -1  -2  213.72    3.51
 -12  -1  -2   41.76    2.30
 -13  -1  -2    5.15    1.59
 -14  -1  -2   51.14    2.55
 -15  -1  -2    9.88    2.02
 -16  -1  -2    2.70    2.42
 -18   2   2    3.57    2.38
 -17   2   2    1.89    2.30
 -17   2   2    2.29    1.97
 -16   2   2   73.18    3.40
 -16   2   2   73.85    3.41
 -15   2   2   43.64    2.98
 -14   2   2    1.68    1.48
 -13   2   2    3.02    1.37
 -12   2   2   17.24    1.19
 -11   2   2   15.63    1.34
 -10   2   2   18.43    1.12
  -9   2   2   79.09    2.97
  -8   2   2    3.76    1.13
  -8   2   2    4.96    0.67
  -7   2   2  500.90   13.14
  -7   2   2  502.22   12.85
  -6   2   2    0.69    1.13
  -6   2   2    0.45    0.79
  -6   2   2    0.82    0.55
   5  -2  -2   48.26    2.88
  -5   2   2   45.65    3.04
  -5   2   2   49.26    3.27
  -5   2   2   48.58    2.91
   4  -2  -2  326.79   11.43
  -4   2   2  341.65   11.67
  -4   2   2  340.45   11.52
   3  -2  -2   10.05    1.08
  -3   2   2   10.47    1.09
   2  -2  -2  194.16    3.15
  -2   2   2  195.80    2.95
  -2   2   2  194.39    3.17
   1  -2  -2  152.61    0.53
  -1   2   2  153.30    0.77
  -1   2   2  152.93    0.54
   0  -2  -2    9.18    1.11
   0  -2  -2    8.66    1.24
   0  -2  -2    9.75    0.88
   0   2   2    9.77    1.29
   0   2   2   10.34    0.88
   0   2   2    8.69    1.03
  -1  -2  -2   53.20    2.23
  -1  -2  -2   55.03    2.19
  -1  -2  -2   53.84    2.38
   1   2   2   52.24    2.19
   1   2   2   52.50    2.19
  -2  -2  -2    1.40    0.60
   2   2   2    1.01    0.42
   2   2   2    0.47    0.63
  -3  -2  -2  427.68    9.18
  -3  -2  -2  426.44    9.23
   3   2   2  426.83    9.15
   3   2   2  430.32    9.26
  -4  -2  -2  184.79    6.33
  -4  -2  -2  188.85    6.46
   4   2   2  189.58    6.52
   5   2   2   11.75    1.26
  -6  -2  -2  193.38    4.76
   6   2   2  196.59    5.10
  -7  -2  -2  101.98    1.32
   7   2   2  100.40    1.90
  -8  -2  -2   33.31    1.24
  -9  -2  -2    1.42    1.11
 -10  -2  -2   14.57    1.80
 -11  -2  -2   98.19    2.76
 -12  -2  -2    1.73    1.61
 -13  -2  -2   14.96    1.71
 -14  -2  -2    2.99    2.03
 -15  -2  -2    4.31    2.35
 -16  -2  -2    3.25    2.56
 -18   3   2   10.59    2.74
 -18   3   2   10.94    2.52
 -17   3   2   18.55    2.49
 -17   3   2   21.58    2.39
 -16   3   2   26.83    2.27
 -15   3   2   13.42    1.70
 -14   3   2    2.30    1.43
 -13   3   2    8.81    1.22
 -12   3   2   25.88    2.03
 -11   3   2   69.40    2.97
 -10   3   2   10.63    1.16
  -9   3   2    3.01    0.92
  -8   3   2   16.20    0.81
  -7   3   2  211.84    5.26
  -6   3   2  103.77    2.39
  -6   3   2  106.20    2.78
  -6   3   2  104.72    2.17
   5  -3  -2  157.06    6.50
  -5   3   2  166.43    6.88
  -5   3   2  158.91    6.52
   4  -3  -2  504.87   16.73
  -4   3   2  494.72   16.73
  -4   3   2  517.89   17.01
  -3   3   2   16.36    0.61
   2  -3  -2  520.45   16.77
   2  -3  -2  517.43   16.61
  -2   3   2  522.56   16.61
  -2   3   2  533.78   16.80
   1  -3  -2   48.47    0.87
  -1   3   2   48.09    0.83
   0  -3  -2    9.93    0.89
   0  -3  -2    9.54    0.90
   0   3   2    9.62    0.79
   0   3   2    9.94    0.95
  -1  -3  -2  361.05    5.58
  -1  -3  -2  356.38    5.46
  -1  -3  -2  362.79    5.55
   1   3   2  360.29    5.50
   1   3   2  356.21    5.47
   1   3   2  360.01    5.61
  -2  -3  -2    0.49    0.61
  -2  -3  -2    0.85    0.73
   2   3   2    1.23    0.51
  -3  -3  -2  700.49   11.41
  -3  -3  -2  694.98   11.44
   3   3   2  699.11   11.48
  -4  -3  -2  288.24    8.75
   4   3   2  300.38    8.92
  -5  -3  -2   34.17    1.04
   5   3   2   34.70    1.58
  -6  -3  -2  157.10    2.05
   6   3   2  160.07    2.65
  -7  -3  -2   21.70    1.41
  -8  -3  -2   10.90    1.50
   8   3   2   12.15    2.29
  -9  -3  -2  138.87    2.68
 -10  -3  -2    8.02    1.45
 -11  -3  -2   75.26    2.13
 -12  -3  -2   24.50    1.89
 -13  -3  -2    2.48    1.87
 -14  -3  -2    4.37    2.29
 -15  -3  -2    1.15    2.65
 -19   4   2    1.13    2.68
 -19   4   2    1.23    2.69
 -18   4   2    8.83    2.69
 -17   4   2   18.57    2.81
 -17   4   2   18.77    2.49
 -16   4   2   10.41    1.89
 -15   4   2    0.33    1.47
 -14   4   2   -0.19    1.34
 -13   4   2   43.27    2.52
 -12   4   2    2.97    1.20
 -11   4   2   23.14    1.28
 -10   4   2  155.79    5.01
  -9   4   2  104.56    3.02
  -8   4   2  269.41    6.05
  -7   4   2  377.66   11.74
   5  -4  -2   60.17    1.59
  -5   4   2   58.39    1.61
  -5   4   2   57.03    2.23
   4  -4  -2   29.00    0.51
  -4   4   2   28.77    0.50
  -3   4   2   14.15    0.39
  -3   4   2   14.73    0.58
   2  -4  -2  192.43    6.97
  -2   4   2  194.03    6.98
  -2   4   2  193.29    7.17
   1  -4  -2  654.09   19.97
   1  -4  -2  651.51   20.06
  -1   4   2  660.28   20.10
  -1   4   2  647.05   19.98
   0  -4  -2  121.56    3.70
   0  -4  -2  120.62    3.71
   0   4   2  121.20    3.75
   0   4   2  117.02    3.51
   0   4   2  119.02    3.63
  -1  -4  -2  141.35    5.35
  -1  -4  -2  143.13    5.43
   1   4   2  144.08    5.37
   1   4   2  141.55    5.50
  -2  -4  -2  112.36    1.71
  -2  -4  -2  111.07    1.75
   2   4   2  112.34    1.80
  -3  -4  -2  141.97    1.97
  -3  -4  -2  139.19    2.00
   3   4   2  142.03    2.12
  -5  -4  -2    3.53    1.05
  -6  -4  -2    3.77    1.05
   6   4   2    3.53    1.70
  -7  -4  -2   41.89    2.53
   7   4   2   42.91    3.24
  -8  -4  -2    0.03    1.12
   8   4   2    0.54    1.98
  -9  -4  -2   32.91    1.97
   9   4   2   29.51    2.68
 -10  -4  -2   51.80    1.90
 -11  -4  -2   21.24    1.88
 -12  -4  -2    0.66    1.84
 -13  -4  -2   -0.20    2.01
 -14  -4  -2    1.83    2.45
 -15  -4  -2    3.08    2.73
 -19   5   2    7.07    2.52
 -19   5   2    8.16    2.95
 -18   5   2    2.53    2.20
 -18   5   2    3.11    2.51
 -17   5   2    1.75    2.02
 -16   5   2   20.53    2.02
 -15   5   2    0.50    1.49
 -14   5   2    0.47    1.40
 -13   5   2    6.05    1.36
 -12   5   2    1.44    1.17
 -11   5   2   20.48    1.26
 -10   5   2   29.49    1.88
  -9   5   2  182.86    4.43
  -8   5   2   62.04    2.84
  -7   5   2  137.68    3.58
  -6   5   2  265.82    8.34
  -5   5   2  206.82    4.80
  -4   5   2  512.00   10.10
  -4   5   2  515.66   10.39
  -4   5   2  512.91   10.02
   3  -5  -2  588.29   15.01
  -3   5   2  591.40   15.26
  -3   5   2  587.53   15.02
   2  -5  -2  314.30   11.34
  -2   5   2  320.75   11.55
  -2   5   2  316.42   11.35
   1  -5  -2    3.77    0.83
  -1   5   2    3.43    0.97
  -1   5   2    3.99    0.82
   0  -5  -2   46.71    1.14
   0   5   2   45.21    0.83
   0   5   2   46.89    0.99
   0   5   2   45.92    1.14
  -1  -5  -2   38.87    1.51
  -1  -5  -2   40.40    1.46
   1   5   2   39.92    1.71
   1   5   2   40.10    1.47
  -2  -5  -2   55.04    1.21
  -2  -5  -2   55.52    1.18
   2   5   2   54.58    1.25
  -3  -5  -2   70.95    1.32
   3   5   2   69.59    1.39
  -4  -5  -2  583.04   10.96
   4   5   2  567.42   11.02
  -5  -5  -2   61.55    1.57
   5   5   2   61.07    1.96
  -6  -5  -2    5.69    1.41
  -7  -5  -2    7.41    1.12
   7   5   2    8.71    2.11
   8   5   2   15.83    2.14
  -9  -5  -2   26.55    1.59
   9   5   2   26.18    2.37
 -10  -5  -2    1.16    1.70
 -11  -5  -2   28.55    2.23
 -12  -5  -2    6.12    2.16
 -13  -5  -2    1.33    2.33
 -14  -5  -2   -0.61    2.64
 -19   6   2    3.28    2.54
 -19   6   2    4.48    2.77
 -18   6   2   -0.53    2.17
 -17   6   2    4.62    1.98
 -16   6   2    0.89    1.56
 -15   6   2    1.17    1.53
 -14   6   2   22.58    2.03
 -13   6   2    3.22    1.22
 -12   6   2   26.72    1.55
 -11   6   2    4.67    0.99
 -10   6   2   51.81    2.86
  -9   6   2  276.92    9.53
  -8   6   2    5.91    0.97
  -7   6   2   70.58    1.69
  -6   6   2   69.02    1.51
  -5   6   2  969.57   21.33
  -4   6   2    9.94    0.82
   3  -6  -2  170.57    3.97
  -3   6   2  170.08    4.34
  -3   6   2  166.35    3.97
   2  -6  -2  104.71    4.43
  -2   6   2  102.91    4.68
  -2   6   2   98.38    4.40
   1  -6  -2  426.56    4.79
  -1   6   2  429.34    4.97
   0   6   2   30.13    1.74
   0   6   2   30.69    1.38
   1   6   2   11.11    1.09
   1   6   2   11.18    0.93
  -2  -6  -2  147.86    2.53
   2   6   2  143.18    2.72
   2   6   2  143.92    2.57
  -3  -6  -2   15.54    1.10
   3   6   2   15.33    1.22
  -4  -6  -2   72.03    1.42
   4   6   2   73.79    1.71
  -5  -6  -2  166.31    2.38
   5   6   2  164.52    2.74
  -6  -6  -2   17.97    1.28
   6   6   2   18.81    1.92
  -7  -6  -2  151.22    2.51
   7   6   2  146.93    2.79
  -8  -6  -2   15.57    1.51
   8   6   2   15.78    2.35
  -9  -6  -2    1.31    1.54
   9   6   2    2.31    2.59
 -10  -6  -2    8.70    2.02
  10   6   2    6.78    3.05
 -11  -6  -2    4.66    1.98
 -12  -6  -2    1.23    2.36
 -13  -6  -2    1.29    2.51
 -14  -6  -2    4.18    2.76
 -19   7   2    4.34    2.58
 -19   7   2    0.24    2.95
 -18   7   2    6.81    2.35
 -17   7   2    2.88    1.76
 -16   7   2   17.64    2.00
 -15   7   2    5.52    1.50
 -14   7   2   64.38    3.55
 -13   7   2    5.46    1.27
 -12   7   2   14.80    1.60
 -11   7   2    0.40    0.95
 -10   7   2  144.27    5.98
  -9   7   2  271.87    7.13
  -8   7   2  101.18    3.07
  -7   7   2   18.77    0.95
  -6   7   2  249.12    6.79
  -5   7   2    1.05    0.54
   3  -7  -2  359.86    6.32
   2  -7  -2  115.88    1.72
  -2   7   2  117.62    2.11
  -1   7   2   85.76    1.44
  -1   7   2   86.60    2.05
   0  -7  -2   41.31    1.96
   0   7   2   41.62    1.62
   0   7   2   39.93    2.03
  -1  -7  -2   36.90    1.55
   1   7   2   35.94    1.57
   1   7   2   34.85    1.36
  -2  -7  -2    0.23    1.17
   2   7   2    1.54    1.25
   2   7   2    0.83    1.32
  -3  -7  -2    7.58    1.46
   3   7   2    9.92    1.66
  -4  -7  -2   13.29    1.32
   4   7   2   12.76    1.52
  -5  -7  -2   36.81    1.53
   5   7   2   38.27    1.99
  -6  -7  -2   84.13    1.85
   6   7   2   82.64    2.43
  -7  -7  -2   24.85    1.70
   7   7   2   23.18    2.28
  -8  -7  -2   30.11    2.01
   8   7   2   32.11    2.97
   9   7   2   16.73    2.81
 -10  -7  -2    0.22    1.92
  10   7   2   -0.11    3.17
 -11  -7  -2    0.40    2.27
 -12  -7  -2    2.23    2.54
 -13  -7  -2    1.15    2.68
 -19   8   2   13.08    2.49
 -18   8   2   15.88    2.22
 -17   8   2   14.09    2.04
 -16   8   2   10.09    1.90
 -15   8   2   -0.31    1.51
 -14   8   2    7.23    1.51
 -13   8   2   10.61    1.35
 -12   8   2   62.83    2.65
 -11   8   2    1.12    0.98
 -10   8   2    0.91    0.85
  -9   8   2   44.20    2.31
  -8   8   2   11.87    1.47
  -7   8   2   63.31    2.26
  -6   8   2   61.05    2.98
  -5   8   2    2.19    0.61
   4  -8  -2   72.08    2.64
   3  -8  -2  285.32    6.50
   2  -8  -2   68.68    1.51
   1  -8  -2    0.87    1.11
  -1   8   2    0.26    1.34
  -1   8   2    0.86    0.86
   0  -8  -2  221.10    4.96
   0   8   2  222.20    4.72
  -1  -8  -2    4.00    1.42
   1   8   2    3.25    1.20
  -2  -8  -2   38.83    3.04
   2   8   2   40.07    3.13
   2   8   2   43.17    2.94
  -3  -8  -2    1.68    1.45
   3   8   2    3.43    1.64
   4   8   2   26.92    2.00
  -5  -8  -2   24.67    1.60
   5   8   2   24.86    2.08
  -6  -8  -2   -0.38    1.63
   6   8   2    0.10    2.23
  -7  -8  -2    2.96    1.95
   7   8   2    0.68    2.58
   8   8   2   54.70    3.17
  -9  -8  -2   23.97    2.44
   9   8   2   21.58    3.31
 -10  -8  -2    7.73    2.38
  10   8   2    8.58    3.46
 -11  -8  -2   -0.32    2.39
 -12  -8  -2   -0.68    2.68
 -13  -8  -2    0.28    3.16
 -19   9   2   25.61    2.75
 -18   9   2    1.74    1.96
 -17   9   2   17.90    2.21
 -16   9   2    2.20    1.76
 -15   9   2    5.71    1.55
 -14   9   2    2.80    1.59
 -13   9   2   11.48    1.47
 -12   9   2   16.00    1.59
 -11   9   2   29.28    1.58
 -10   9   2   22.75    1.71
  -9   9   2   23.08    1.12
  -8   9   2   13.62    1.43
  -7   9   2  104.94    3.90
  -6   9   2   18.15    0.65
  -5   9   2   13.79    0.75
   4  -9  -2   11.55    1.30
   3  -9  -2    8.94    1.12
   2  -9  -2   37.34    1.12
   1  -9  -2   58.21    2.51
  -1   9   2   62.68    2.29
   0  -9  -2  156.51    4.44
   0   9   2  157.93    4.18
  -1  -9  -2    8.16    1.48
   1   9   2    9.12    1.41
   1   9   2    8.64    1.60
   2   9   2  224.43    4.91
   2   9   2  229.14    5.20
  -3  -9  -2  238.05    4.46
   3   9   2  241.53    4.51
  -4  -9  -2    5.58    1.75
  -5  -9  -2  132.12    2.72
   5   9   2  135.84    3.47
  -6  -9  -2   22.14    1.88
   6   9   2   24.07    2.49
  -7  -9  -2   68.19    2.53
   7   9   2   70.76    3.24
  -8  -9  -2    4.04    2.03
   8   9   2    4.57    3.19
   9   9   2   22.04    3.48
 -10  -9  -2   33.14    2.88
  10   9   2   33.89    3.89
 -11  -9  -2    5.43    2.88
  11   9   2    2.64    4.33
 -12  -9  -2   -0.54    3.07
 -19  10   2    0.78    2.11
 -18  10   2   13.40    2.31
 -17  10   2    3.10    1.89
 -16  10   2   45.15    3.30
 -15  10   2   25.32    2.08
 -14  10   2   15.25    1.95
 -13  10   2   27.40    1.77
 -12  10   2    3.65    1.16
 -11  10   2    8.21    1.08
 -10  10   2  227.69    6.01
  -9  10   2  152.06    6.03
  -8  10   2  122.30    3.36
  -7  10   2   12.08    0.75
  -6  10   2   37.16    1.07
   4 -10  -2    2.20    1.13
   3 -10  -2   46.45    3.12
   2 -10  -2   50.64    1.52
   1 -10  -2  142.27    4.72
  -1  10   2  137.51    4.45
   0 -10  -2   16.13    1.71
   0  10   2   14.28    1.44
  -1 -10  -2   16.64    2.00
   1  10   2   16.32    1.96
  -2 -10  -2    3.19    1.69
   2  10   2    3.50    2.00
  -3 -10  -2    5.18    1.78
   3  10   2    5.54    2.09
  -4 -10  -2  109.67    2.09
   4  10   2  111.10    2.43
  -5 -10  -2    0.85    2.00
   5  10   2    1.77    2.39
  -6 -10  -2    0.43    2.08
   6  10   2    0.35    2.78
  -7 -10  -2    0.18    2.29
   7  10   2    2.59    3.19
  -8 -10  -2   30.24    2.61
   8  10   2   28.70    3.50
  -9 -10  -2    0.27    2.61
   9  10   2    0.09    3.81
 -10 -10  -2   -0.53    2.77
  10  10   2    0.36    4.15
 -11 -10  -2    8.60    3.46
  11  10   2    8.24    4.83
 -19  11   2   11.49    2.49
 -18  11   2    3.97    2.19
 -17  11   2    0.87    1.86
 -16  11   2   10.81    1.90
 -15  11   2   81.89    4.07
 -14  11   2    3.42    1.48
 -13  11   2   31.45    1.92
 -12  11   2    0.50    1.18
 -11  11   2  131.58    3.37
 -10  11   2    1.47    1.00
  -9  11   2   47.91    2.38
  -8  11   2   14.98    1.06
  -7  11   2   24.64    0.99
  -6  11   2   64.53    1.75
   4 -11  -2   40.58    1.67
   3 -11  -2  146.53    2.77
   2 -11  -2   35.99    2.78
  -2  11   2   36.39    2.54
   1 -11  -2   -0.14    1.65
  -1  11   2    0.94    1.41
   0 -11  -2   52.38    2.49
   0  11   2   53.99    2.52
  -1 -11  -2   69.49    2.15
   1  11   2   67.66    1.91
  -2 -11  -2   35.02    2.19
   2  11   2   35.68    2.15
  -3 -11  -2    2.85    2.25
   3  11   2    1.74    2.35
  -4 -11  -2   19.82    2.16
   4  11   2   18.64    2.35
  -5 -11  -2   10.45    2.49
   5  11   2    8.88    2.75
  -6 -11  -2    8.03    2.32
   6  11   2    7.86    2.97
  -7 -11  -2   -0.46    2.57
   7  11   2    4.11    3.48
  -8 -11  -2  113.41    3.36
   8  11   2  118.15    4.28
  -9 -11  -2    0.33    2.93
   9  11   2    4.64    4.30
 -10 -11  -2    6.36    3.47
  10  11   2    4.03    4.60
 -19  12   2    5.48    2.28
 -18  12   2    2.11    2.14
 -17  12   2    0.03    1.73
 -16  12   2    4.06    1.78
 -15  12   2   16.82    1.67
 -14  12   2    7.17    1.57
 -13  12   2   27.00    1.90
 -12  12   2   31.28    1.46
 -11  12   2   35.07    1.63
 -10  12   2    2.25    1.21
  -9  12   2   25.89    1.81
  -8  12   2   36.42    1.68
  -7  12   2   50.04    1.32
  -6  12   2   38.95    1.86
   5 -12  -2   57.10    2.60
   4 -12  -2   45.95    2.21
   3 -12  -2  156.84    3.16
   2 -12  -2    5.42    1.70
  -2  12   2    7.37    1.62
   1 -12  -2    6.79    1.82
  -1  12   2    8.66    1.69
   0 -12  -2   -0.05    1.73
   0  12   2    1.34    1.81
  -1 -12  -2    3.87    2.11
   1  12   2    2.61    1.98
  -2 -12  -2   14.07    2.33
   2  12   2   16.57    2.42
  -3 -12  -2    6.69    2.27
   3  12   2    6.93    2.50
  -4 -12  -2    6.79    2.52
  -5 -12  -2   18.37    2.65
   5  12   2   16.99    2.88
   6  12   2    8.53    3.44
  -7 -12  -2   21.43    2.72
   7  12   2   24.27    3.82
   8  12   2   11.26    4.30
   9  12   2    4.58    4.75
 -10 -12  -2   14.99    3.79
  10  12   2   12.25    5.04
 -18  13   2    0.77    2.12
 -17  13   2    2.69    1.90
 -16  13   2    5.01    1.78
 -15  13   2    7.70    1.75
 -14  13   2   38.19    2.94
 -13  13   2    8.11    1.43
 -12  13   2   13.89    1.32
 -11  13   2   31.51    1.64
 -10  13   2    7.57    1.32
  -9  13   2    0.55    1.06
  -8  13   2   34.72    1.38
  -7  13   2   50.20    2.17
  -6  13   2   20.50    1.19
   5 -13  -2   25.85    1.96
   4 -13  -2    0.74    1.64
   3 -13  -2   44.57    2.26
  -3  13   2   44.01    2.19
   2 -13  -2    1.35    1.80
  -2  13   2    3.22    1.83
   1 -13  -2    0.15    1.90
  -1  13   2    1.33    1.86
   0 -13  -2    5.95    2.12
   0  13   2    6.24    1.96
  -1 -13  -2   21.06    2.39
  -2 -13  -2    7.76    2.58
   2  13   2   11.00    2.61
  -3 -13  -2   11.40    2.83
   3  13   2   12.12    3.00
  -4 -13  -2   -0.69    2.65
   4  13   2    0.30    2.88
  -5 -13  -2   31.21    2.88
   5  13   2   32.75    3.29
  -6 -13  -2    4.41    2.92
   6  13   2    1.61    3.66
  -7 -13  -2    1.28    3.01
   7  13   2    1.01    4.05
   8  13   2   11.18    4.63
  -9 -13  -2    6.03    4.12
   9  13   2    4.65    5.17
 -18  14   2    0.18    2.07
 -17  14   2   -0.05    1.87
 -16  14   2    1.34    1.82
 -15  14   2    8.92    1.87
 -14  14   2    0.78    1.51
 -13  14   2    1.71    1.41
 -12  14   2   33.49    1.91
 -11  14   2    4.85    1.35
 -10  14   2    5.67    1.38
  -9  14   2   -0.07    1.07
  -8  14   2   12.36    1.42
  -7  14   2   12.88    1.13
  -6  14   2    4.62    1.08
   5 -14  -2   61.70    3.20
   4 -14  -2   91.14    2.29
   3 -14  -2   17.25    2.12
   2 -14  -2   14.41    2.36
  -2  14   2   12.13    2.31
   1 -14  -2   17.35    2.20
  -1  14   2   16.56    2.16
   0 -14  -2   10.16    2.28
   0  14   2    9.77    2.51
  -1 -14  -2   17.24    2.26
   1  14   2   17.36    2.41
  -2 -14  -2   31.26    2.56
   2  14   2   31.76    2.89
  -3 -14  -2   16.18    2.80
   3  14   2   15.50    3.10
  -4 -14  -2   54.99    2.96
   4  14   2   58.10    3.46
  -5 -14  -2   29.43    3.01
   5  14   2   29.36    3.74
  -6 -14  -2    3.82    3.38
   6  14   2    1.85    4.16
  -7 -14  -2    9.10    3.44
   7  14   2    8.82    4.48
  -8 -14  -2    3.21    3.73
   8  14   2    7.28    5.33
 -18  15   2   -0.22    2.07
 -17  15   2    0.70    1.97
 -16  15   2    0.79    1.90
 -15  15   2   11.59    1.92
 -14  15   2   26.35    1.99
 -13  15   2   21.87    1.94
 -12  15   2    2.27    1.40
 -11  15   2   10.29    1.55
 -10  15   2    2.94    1.37
  -9  15   2    6.27    1.25
  -8  15   2    4.04    1.21
  -7  15   2    0.74    1.20
   5 -15  -2   19.70    2.20
   4 -15  -2  152.28    3.89
   3 -15  -2  108.63    3.74
  -3  15   2  107.62    3.64
   2 -15  -2   22.17    2.35
  -2  15   2   21.06    2.49
   1 -15  -2    2.28    2.29
  -1  15   2    3.28    2.43
   0 -15  -2    7.60    2.54
   0  15   2    6.51    2.54
  -1 -15  -2    0.31    2.50
  -2 -15  -2    5.80    2.68
   2  15   2    6.75    3.19
  -3 -15  -2    7.65    2.89
   3  15   2    7.65    3.36
  -4 -15  -2    2.96    3.29
   4  15   2    6.63    3.77
  -5 -15  -2   37.18    3.54
   5  15   2   35.02    4.04
  -6 -15  -2   26.91    3.67
   6  15   2   30.20    4.45
  -7 -15  -2    3.38    3.91
   7  15   2    3.85    4.93
 -17  16   2    7.16    2.15
 -16  16   2    6.36    2.00
 -15  16   2   13.54    1.94
 -14  16   2   -0.31    1.61
 -13  16   2    1.07    1.62
 -12  16   2    2.35    1.49
 -11  16   2    6.61    1.71
 -10  16   2   47.28    2.07
  -9  16   2   57.08    2.78
  -8  16   2    2.40    1.32
  -7  16   2   26.86    1.55
   5 -16  -2    0.61    2.21
   4 -16  -2   37.01    2.58
  -4  16   2   35.25    2.78
   3 -16  -2   29.21    2.80
  -3  16   2   31.05    2.82
   2 -16  -2  104.90    3.37
  -2  16   2  106.74    3.28
   1 -16  -2    6.64    2.50
  -1  16   2    7.85    2.72
   0 -16  -2    1.30    2.52
   0  16   2    3.28    2.96
  -1 -16  -2    2.35    2.94
   1  16   2    0.73    3.07
  -2 -16  -2   15.11    2.97
   2  16   2   15.84    3.67
  -3 -16  -2    1.35    3.41
   3  16   2   -0.94    3.68
  -4 -16  -2    3.80    3.60
  -5 -16  -2    2.97    4.04
   5  16   2    0.12    4.49
 -17  17   2    9.92    2.30
 -16  17   2    1.29    2.00
 -15  17   2    6.17    1.99
 -14  17   2    2.52    1.88
 -13  17   2   -0.42    1.63
 -12  17   2   13.62    1.87
 -11  17   2    6.54    1.57
 -10  17   2    2.67    1.42
  -9  17   2    3.29    1.35
  -8  17   2    1.71    1.45
  -7  17   2    9.57    1.56
   5 -17  -2    3.49    2.41
   4 -17  -2    3.02    2.68
  -4  17   2    1.69    2.89
   3 -17  -2   -0.67    2.63
  -3  17   2    1.48    2.82
   2 -17  -2   58.89    3.09
  -2  17   2   60.17    3.14
   1 -17  -2   10.97    2.69
  -1  17   2   10.85    3.13
   0 -17  -2    1.03    3.00
  -1 -17  -2   22.23    3.25
   1  17   2   21.48    3.51
  -2 -17  -2   11.11    3.42
   2  17   2   14.98    4.01
  -3 -17  -2   13.33    3.34
   3  17   2   14.99    3.96
  -4 -17  -2    9.71    3.93
   4  17   2    8.38    4.51
 -16  18   2    1.44    2.11
 -15  18   2    0.31    1.96
 -14  18   2   10.67    2.03
 -13  18   2    7.71    1.90
 -12  18   2    7.02    1.80
 -11  18   2    8.40    1.86
 -10  18   2   25.25    1.84
  -9  18   2    1.93    1.67
  -8  18   2    0.84    1.53
  -7  18   2    5.62    1.64
   5 -18  -2   18.15    2.91
  -5  18   2   18.91    3.22
   4 -18  -2   11.61    3.02
  -4  18   2   14.23    3.36
   3 -18  -2   -0.73    2.82
  -3  18   2    1.47    3.07
   2 -18  -2    0.75    3.19
  -2  18   2    1.41    3.25
   1 -18  -2   36.43    3.22
  -1  18   2   36.80    3.39
   0 -18  -2    7.54    3.26
   0  18   2    6.81    3.49
  -1 -18  -2    1.10    3.62
   1  18   2    3.06    4.15
  -2 -18  -2   -0.89    3.48
   2  18   2   -1.03    3.98
  -3 -18  -2    3.20    4.12
   3  18   2   10.85    4.54
 -15  19   2   23.01    2.62
 -14  19   2    0.86    1.93
 -13  19   2    0.59    1.85
 -12  19   2    1.95    1.93
 -11  19   2   -0.02    1.73
 -10  19   2   12.67    1.72
  -9  19   2    4.90    1.82
  -8  19   2    0.81    1.72
  -7  19   2   15.38    1.83
  -6  19   2    1.04    3.66
   5 -19  -2    7.69    3.13
  -5  19   2   11.11    3.76
   4 -19  -2   -0.12    2.92
  -4  19   2   -0.27    3.49
  -3  19   2   12.66    3.55
   2 -19  -2   -0.85    3.36
  -2  19   2    1.11    3.60
   1 -19  -2    6.12    3.55
  -1  19   2    3.67    3.74
   0 -19  -2   -0.79    3.42
   0  19   2   -0.88    3.78
  -1 -19  -2    2.17    3.91
   1  19   2    0.36    4.38
 -14  20   2    0.11    2.07
 -13  20   2    5.91    2.18
 -12  20   2    0.25    2.12
 -11  20   2    0.84    1.93
 -10  20   2    6.00    1.84
  -9  20   2    3.54    1.87
  -8  20   2    0.17    1.95
  -7  20   2    1.36    1.98
  -6  20   2   12.38    3.86
   5 -20  -2    1.94    3.53
   4 -20  -2   19.31    3.75
  -4  20   2   21.54    3.80
   3 -20  -2   -0.79    3.45
  -3  20   2   -0.03    3.85
   2 -20  -2   -0.69    3.87
  -2  20   2    3.29    3.88
   1 -20  -2    9.39    3.97
 -12  21   2    2.42    2.42
 -11  21   2    5.07    2.12
 -10  21   2    2.70    2.19
  -9  21   2    8.98    2.19
  -8  21   2    9.14    2.19
  -7  21   2    8.53    4.58
  -6  21   2    9.54    4.32
  -6  21   2   10.89    2.12
  -5  21   2   -0.71    4.21
   4 -21  -2    2.80    4.04
  -4  21   2    2.89    4.12
   3 -21  -2    1.92    3.90
  -3  21   2    1.85    4.18
  -5  23  -3    5.70    5.40
  -5  23  -3    1.85    4.21
  -5  23  -3    2.71    2.29
  -6  23  -3    3.52    2.29
  -6  23  -3    1.53    5.30
  -6  23  -3    3.39    4.26
  -7  23  -3    9.75    4.11
  -7  23  -3   10.17    2.33
  -8  23  -3    0.54    2.17
  -8  23  -3    0.83    4.03
  -9  23  -3    2.54    3.95
  -9  23  -3    2.53    2.25
  -2  22  -3    7.09    4.21
  -2  22  -3    4.64    4.85
   2 -22   3    1.94    3.76
  -3  22  -3    2.68    4.67
  -3  22  -3    5.91    4.04
   3 -22   3    4.41    3.60
  -4  22  -3    0.93    3.77
  -5  22  -3    4.37    2.05
  -5  22  -3    3.71    3.72
  -5  22  -3    2.46    4.71
  -6  22  -3    0.02    1.93
  -6  22  -3    1.18    3.73
  -7  22  -3   -0.48    1.90
  -7  22  -3    0.63    3.64
  -8  22  -3    8.40    1.92
  -9  22  -3    3.32    2.02
 -10  22  -3    7.48    2.18
 -11  22  -3   -0.52    2.14
 -12  22  -3    0.03    2.29
   0  21  -3    2.77    4.65
  -1  21  -3   12.25    3.71
  -1  21  -3   11.82    4.46
   1 -21   3   12.73    3.56
  -2  21  -3    1.81    3.68
  -2  21  -3    4.06    4.40
   2 -21   3    2.03    3.23
  -3  21  -3    1.45    4.26
  -3  21  -3    3.07    3.56
   3 -21   3   -0.63    3.15
  -4  21  -3   10.01    4.29
  -4  21  -3    7.26    3.46
  -5  21  -3    6.76    1.97
  -5  21  -3    8.30    3.45
  -5  21  -3   10.20    4.04
  -6  21  -3   16.03    2.02
  -6  21  -3   15.48    3.62
  -7  21  -3    4.11    1.72
  -8  21  -3    3.99    1.77
  -9  21  -3    2.02    1.93
 -10  21  -3    4.34    2.04
 -11  21  -3   14.08    2.31
 -12  21  -3    0.38    1.99
 -13  21  -3   14.75    2.32
 -14  21  -3    2.73    2.24
   2  20  -3   10.75    4.64
  -2 -20   3    8.16    3.76
   1  20  -3   18.77    4.40
  -1 -20   3   16.40    3.54
   0  20  -3    3.69    4.08
   0  20  -3    3.93    3.21
  -1  20  -3    2.62    3.29
  -1  20  -3    5.00    3.88
   1 -20   3    3.21    3.28
  -2  20  -3    3.80    3.26
  -2  20  -3    0.79    3.76
   2 -20   3    0.32    3.06
  -3  20  -3    5.75    3.38
  -3  20  -3    3.13    3.91
   3 -20   3    3.35    2.92
  -4  20  -3    3.26    2.98
  -4  20  -3    8.36    3.95
   4 -20   3    3.92    2.74
  -5  20  -3    0.93    1.69
  -6  20  -3   12.74    1.80
  -7  20  -3   11.41    1.85
  -8  20  -3    5.12    1.63
  -9  20  -3    1.83    1.76
 -10  20  -3    5.46    1.75
 -11  20  -3    7.38    1.99
 -12  20  -3    5.68    1.97
 -13  20  -3    1.70    2.00
 -14  20  -3   11.59    2.20
 -15  20  -3    1.40    2.13
   4  19  -3   -0.60    4.82
  -4 -19   3    0.81    3.75
   3  19  -3    4.47    4.38
  -3 -19   3    5.38    3.85
   2  19  -3    2.14    4.10
  -2 -19   3    2.26    3.58
   1  19  -3   17.74    2.91
   1  19  -3   19.92    3.88
  -1 -19   3   15.79    3.27
   0  19  -3    0.96    3.59
   0  19  -3    3.04    3.02
   0 -19   3    6.82    3.14
  -1  19  -3    2.04    3.60
  -1  19  -3    0.46    2.99
   1 -19   3    1.60    2.98
  -2  19  -3    3.28    3.47
  -2  19  -3    2.12    2.95
   2 -19   3    0.24    2.88
  -3  19  -3   39.98    3.81
  -3  19  -3   42.25    3.36
   3 -19   3   41.17    3.11
   4 -19   3    1.36    2.37
  -5  19  -3    0.02    1.47
  -6  19  -3   13.41    1.49
  -7  19  -3   14.03    1.68
  -8  19  -3    0.51    1.47
  -9  19  -3   15.11    1.59
 -10  19  -3    0.80    1.63
 -11  19  -3    2.37    1.69
 -12  19  -3    1.02    1.72
 -13  19  -3   10.59    1.92
 -14  19  -3    5.22    1.83
 -15  19  -3    2.11    2.05
 -16  19  -3    4.76    2.24
   5  18  -3    2.43    4.72
  -5 -18   3    4.73    4.12
   4  18  -3    4.49    4.22
  -4 -18   3    6.64    3.57
   3  18  -3    1.01    3.72
  -3 -18   3   -0.80    3.35
   2  18  -3   13.01    3.54
  -2 -18   3   14.65    3.17
   1  18  -3    4.47    3.34
   1  18  -3    6.12    2.55
  -1 -18   3    6.73    3.22
   0  18  -3   16.80    3.28
   0  18  -3   17.18    2.88
   0 -18   3   16.14    2.81
  -1  18  -3   15.31    3.16
   1 -18   3   14.61    2.68
  -2  18  -3    2.34    3.07
  -2  18  -3    1.36    2.53
   2 -18   3    0.27    2.39
  -3  18  -3    0.33    3.07
  -3  18  -3    0.73    2.56
   3 -18   3    1.52    2.40
   4 -18   3    2.72    2.16
  -5  18  -3   45.38    1.65
  -6  18  -3    2.48    1.32
  -7  18  -3   32.77    2.00
  -8  18  -3   24.08    1.48
  -9  18  -3    1.12    1.43
 -10  18  -3    3.79    1.65
 -11  18  -3   11.68    1.72
 -12  18  -3    8.27    1.71
 -13  18  -3   10.97    1.80
 -14  18  -3    1.56    1.73
 -15  18  -3    3.28    1.92
 -16  18  -3    3.09    1.96
   6  17  -3    1.85    4.38
  -6 -17   3    2.14    4.08
   5  17  -3    2.74    4.26
  -5 -17   3   -0.29    3.50
   4  17  -3    3.72    3.72
  -4 -17   3    4.31    3.71
   3  17  -3    9.23    3.48
  -3 -17   3    8.50    3.21
   2  17  -3   42.75    3.36
  -2 -17   3   41.93    3.04
   1  17  -3   10.03    3.04
   1  17  -3   11.67    2.45
  -1 -17   3    8.19    2.64
   0  17  -3    1.55    2.70
   0  17  -3    4.14    2.35
   0 -17   3    1.60    2.53
  -1  17  -3   23.57    2.58
  -1  17  -3   24.96    2.98
   1 -17   3   21.38    2.49
  -2  17  -3   25.17    2.69
  -2  17  -3   23.42    2.21
   2 -17   3   26.15    2.32
   3 -17   3    0.77    2.18
   4 -17   3    0.65    1.85
  -5  17  -3   16.96    1.39
  -6  17  -3    3.43    1.23
  -7  17  -3    4.61    1.26
  -8  17  -3    2.38    1.32
  -9  17  -3   13.65    1.51
 -10  17  -3    0.43    1.32
 -11  17  -3    6.57    1.50
 -12  17  -3    3.49    1.60
 -13  17  -3    0.21    1.59
 -14  17  -3    6.74    1.80
 -15  17  -3    8.28    2.10
 -16  17  -3   20.64    2.38
 -17  17  -3    3.07    3.75
   8  16  -3   -0.70    4.49
  -8 -16   3    4.27    4.05
   7  16  -3   10.85    4.24
  -7 -16   3    9.76    3.68
   6  16  -3    2.50    3.86
  -6 -16   3    0.97    3.27
   5  16  -3   12.24    3.66
  -5 -16   3   11.04    3.15
   4  16  -3   17.42    3.32
   3  16  -3    5.15    3.20
  -3 -16   3    4.99    2.94
   2  16  -3   10.32    2.88
  -2 -16   3    8.50    2.81
   1  16  -3   52.05    3.17
  -1 -16   3   49.21    2.85
   0  16  -3    2.98    2.68
   0  16  -3    2.79    2.05
   0 -16   3    0.15    2.34
  -1  16  -3   35.30    2.23
  -1  16  -3   35.46    2.68
   1 -16   3   37.12    2.38
  -2  16  -3    2.04    2.49
   2 -16   3    2.42    2.09
   3 -16   3   -0.11    1.88
   4 -16   3   12.00    1.89
  -5  16  -3   18.11    1.32
  -6  16  -3    8.35    1.37
  -7  16  -3   63.28    2.58
  -8  16  -3   71.06    2.31
  -9  16  -3    1.30    1.17
 -10  16  -3   11.26    1.42
 -11  16  -3    2.51    1.41
 -12  16  -3    1.48    1.41
 -13  16  -3    8.73    1.66
 -14  16  -3    8.14    1.78
 -15  16  -3    6.98    1.88
 -16  16  -3   15.59    2.37
 -17  16  -3    7.92    3.42
   9  15  -3    5.96    4.64
  -9 -15   3    8.62    3.76
   8  15  -3    2.72    4.14
  -8 -15   3    4.60    3.56
   7  15  -3   21.98    3.72
  -7 -15   3   24.41    3.71
   6  15  -3    8.76    3.44
  -6 -15   3    9.92    3.23
   5  15  -3    3.84    3.46
  -5 -15   3    4.90    3.17
   4  15  -3   -0.60    2.88
  -4 -15   3   -0.68    2.91
  -3 -15   3    9.36    2.68
   2  15  -3    2.00    2.50
   2  15  -3    2.10    1.87
  -2 -15   3    0.86    2.51
   1  15  -3   21.75    2.54
  -1 -15   3   23.73    2.50
   0  15  -3   38.02    2.20
   0  15  -3   36.85    2.65
   0 -15   3   37.53    2.44
  -1  15  -3   14.44    2.16
  -1  15  -3   16.45    1.86
   1 -15   3   16.30    2.06
   2 -15   3   55.66    2.24
   3 -15   3   18.63    1.86
   4 -15   3    1.69    1.52
  -5  15  -3   45.92    2.50
  -6  15  -3  126.97    3.27
  -7  15  -3   -0.12    1.04
  -8  15  -3   59.37    2.20
  -9  15  -3   47.72    2.00
 -10  15  -3    2.68    1.16
 -11  15  -3   17.94    1.68
 -12  15  -3   42.14    2.88
 -13  15  -3   12.25    2.02
 -14  15  -3    3.04    1.59
 -15  15  -3    3.35    1.63
 -16  15  -3    3.59    3.03
 -16  15  -3    3.93    1.87
 -17  15  -3    3.69    3.27
 -18  15  -3    3.97    2.30
 -18  15  -3    1.26    3.47
  -9 -14   3   10.08    3.52
   8  14  -3    2.40    3.68
  -8 -14   3    4.23    3.20
   7  14  -3   17.03    3.17
  -7 -14   3   17.02    3.03
   6  14  -3    1.27    3.22
  -6 -14   3    0.40    2.81
   5  14  -3    1.22    3.07
  -5 -14   3    1.11    2.59
   4  14  -3   18.82    2.78
  -4 -14   3   18.33    2.70
   3  14  -3   15.33    2.51
  -3 -14   3   14.28    2.43
   2  14  -3   26.03    2.39
   2  14  -3   24.64    1.74
  -2 -14   3   24.06    2.34
   1  14  -3   73.52    2.66
   1  14  -3   70.36    2.74
  -1 -14   3   71.73    2.73
   0  14  -3   16.50    1.59
   0  14  -3   17.30    1.96
   0 -14   3   16.15    1.88
  -1  14  -3   62.82    2.43
   1 -14   3   66.56    2.33
   2 -14   3    4.35    1.57
   3 -14   3    1.11    1.50
  -5  14  -3   15.07    0.81
  -6  14  -3   57.69    1.83
  -7  14  -3    1.85    0.91
  -8  14  -3   34.51    1.41
  -9  14  -3   69.40    2.00
 -10  14  -3    2.48    1.22
 -11  14  -3   25.49    1.51
 -12  14  -3   21.57    1.63
 -13  14  -3   15.13    1.58
 -14  14  -3    8.53    1.60
 -15  14  -3   12.36    1.98
 -16  14  -3   20.62    2.21
 -17  14  -3    7.47    2.91
 -17  14  -3    6.36    2.01
 -18  14  -3   -0.49    3.35
 -18  14  -3    2.42    2.12
  10  13  -3    7.45    4.09
 -10 -13   3    8.33    3.20
   9  13  -3    6.71    3.83
   8  13  -3    2.15    3.19
  -8 -13   3    3.45    2.85
   7  13  -3   23.49    3.13
  -7 -13   3   19.50    2.73
   6  13  -3   17.97    3.14
  -6 -13   3   16.57    2.68
   5  13  -3   11.09    2.85
  -5 -13   3   11.17    2.39
   4  13  -3   10.15    2.51
  -4 -13   3    8.58    2.32
   3  13  -3   22.62    2.32
  -3 -13   3   20.02    2.07
   2  13  -3   14.96    1.49
   2  13  -3   14.81    2.03
  -2 -13   3   14.13    2.10
   1  13  -3   65.58    1.62
   1  13  -3   63.50    2.06
  -1 -13   3   63.79    1.97
   0  13  -3   36.58    1.93
   0 -13   3   38.17    1.76
  -1  13  -3  105.85    2.12
   2 -13   3  261.88    6.61
   3 -13   3   22.35    2.37
  -5  13  -3  106.94    2.16
  -6  13  -3   10.57    0.92
  -7  13  -3   27.33    1.23
  -8  13  -3    9.57    1.32
  -9  13  -3  160.29    4.09
 -10  13  -3   71.40    3.32
 -11  13  -3   28.26    1.38
 -12  13  -3   63.66    2.65
 -13  13  -3   25.62    1.70
 -14  13  -3   22.15    1.87
 -15  13  -3   18.43    2.08
 -16  13  -3   13.60    3.25
 -16  13  -3   13.49    2.19
 -17  13  -3    4.29    3.04
 -17  13  -3    4.17    1.80
 -18  13  -3   -0.39    3.10
 -18  13  -3   -0.06    1.87
  11  12  -3    7.07    4.29
  10  12  -3    1.95    3.75
 -10 -12   3    2.02    2.78
   9  12  -3    8.66    3.44
  -9 -12   3    8.24    2.57
   8  12  -3   10.41    3.10
  -8 -12   3    9.79    2.46
   7  12  -3    0.25    2.73
  -7 -12   3   -0.26    2.15
   6  12  -3   22.56    2.69
  -6 -12   3   20.72    2.24
   5  12  -3   17.92    2.49
  -5 -12   3   19.51    2.27
   4  12  -3    6.62    2.40
  -4 -12   3    3.90    1.82
   3  12  -3   10.53    1.86
  -3 -12   3   10.83    1.83
   2  12  -3   15.36    2.25
   2  12  -3   16.84    1.74
  -2 -12   3   15.75    2.19
   1  12  -3    4.52    1.80
   1  12  -3    3.63    1.26
  -1 -12   3    3.63    1.68
   0  12  -3  104.29    2.49
   0  12  -3  106.62    2.18
   0 -12   3  103.67    2.13
   1 -12   3   42.86    2.93
   2 -12   3  165.30    3.62
   3 -12   3    7.73    1.51
  -5  12  -3  184.24    3.88
  -6  12  -3   85.83    2.74
  -7  12  -3    8.15    1.07
  -8  12  -3   36.06    1.45
  -9  12  -3    4.13    1.02
 -10  12  -3   12.99    1.21
 -11  12  -3    0.59    1.02
 -12  12  -3   45.78    2.47
 -13  12  -3    3.40    1.38
 -14  12  -3   35.48    2.66
 -15  12  -3   36.82    2.40
 -15  12  -3   37.03    3.27
 -16  12  -3    1.78    1.65
 -16  12  -3   -0.33    2.54
 -17  12  -3   -0.41    1.71
 -17  12  -3    2.48    3.06
 -18  12  -3    1.71    2.04
 -18  12  -3    2.27    3.12
  12  11  -3   -0.79    4.51
 -12 -11   3   -0.34    2.78
  11  11  -3    8.90    3.96
 -11 -11   3    6.19    2.68
  10  11  -3    6.49    3.65
 -10 -11   3    1.65    2.50
   9  11  -3   -0.30    3.18
  -9 -11   3    1.29    2.38
   8  11  -3    4.44    2.90
  -8 -11   3    4.01    2.09
   7  11  -3   19.33    2.69
  -7 -11   3   19.89    2.11
   6  11  -3    1.68    2.55
  -6 -11   3    1.73    1.91
   5  11  -3    6.10    2.18
  -5 -11   3    4.40    1.75
   4  11  -3   38.60    2.06
  -4 -11   3   36.81    1.80
   3  11  -3   32.10    2.00
  -3 -11   3   31.59    1.77
   2  11  -3   12.44    1.81
   2  11  -3   12.00    1.22
  -2 -11   3   11.58    1.79
   1  11  -3    1.28    1.07
   1  11  -3    1.58    1.57
  -1 -11   3   -0.28    1.45
   0  11  -3    6.70    1.70
   0  11  -3    5.15    1.32
   0 -11   3    6.98    1.60
   1 -11   3    6.65    1.17
   2 -11   3  134.25    2.75
   3 -11   3    3.20    1.00
  -4  11  -3   17.63    1.21
  -5  11  -3    0.82    0.61
  -6  11  -3   24.80    1.53
  -7  11  -3   15.20    1.12
  -8  11  -3    4.59    1.02
  -9  11  -3   12.94    1.02
 -10  11  -3   37.23    2.69
 -11  11  -3    1.25    1.08
 -12  11  -3    7.21    1.32
 -13  11  -3   -0.10    1.22
 -14  11  -3   27.05    2.10
 -15  11  -3    5.66    2.46
 -15  11  -3    6.85    1.65
 -16  11  -3   -0.41    1.63
 -16  11  -3    0.23    2.38
 -17  11  -3   22.89    2.27
 -17  11  -3   21.96    3.08
 -18  11  -3   13.09    2.11
  13  10  -3    5.91    4.56
 -13 -10   3    3.49    2.87
  12  10  -3   20.65    4.16
 -12 -10   3   20.62    2.78
  11  10  -3   22.18    3.93
 -11 -10   3   18.68    2.81
  10  10  -3   25.06    3.12
 -10 -10   3   27.78    2.18
   9  10  -3    2.53    2.93
  -9 -10   3    0.77    2.02
   8  10  -3   16.29    2.66
  -8 -10   3   16.58    1.90
   7  10  -3    0.09    2.38
  -7 -10   3    0.24    1.80
   6  10  -3    1.21    2.33
  -6 -10   3    2.08    1.61
   5  10  -3    5.08    1.95
  -5 -10   3    5.30    1.57
   4  10  -3   17.24    1.92
  -4 -10   3   14.57    1.31
   3  10  -3  120.52    3.34
  -3 -10   3  114.68    3.24
   2  10  -3   37.98    2.48
   2  10  -3   37.52    1.98
  -2 -10   3   36.96    2.47
   1  10  -3   17.10    1.77
   1  10  -3   17.73    1.52
  -1 -10   3   17.49    1.71
   0  10  -3  182.89    2.16
   0  10  -3  180.92    2.47
   0 -10   3  180.86    2.34
   1 -10   3   38.42    1.82
   2 -10   3   31.53    2.31
   3 -10   3  251.94    5.99
  -4  10  -3  332.79    9.49
  -5  10  -3   59.58    1.89
  -6  10  -3  331.13   12.34
  -7  10  -3   68.01    2.38
  -8  10  -3    3.06    0.76
  -9  10  -3   14.41    1.00
 -10  10  -3  162.33    5.50
 -11  10  -3   47.94    2.69
 -12  10  -3    2.48    1.18
 -13  10  -3    0.94    1.25
 -14  10  -3    3.57    2.31
 -14  10  -3    1.90    1.53
 -15  10  -3    9.68    2.47
 -15  10  -3   10.16    1.76
 -16  10  -3   10.71    1.70
 -16  10  -3   10.76    2.51
 -17  10  -3    4.92    2.78
 -17  10  -3    6.26    2.00
 -18  10  -3    5.30    2.99
 -18  10  -3    4.18    2.49
  13   9  -3    9.24    4.22
 -13  -9   3    8.40    2.60
  12   9  -3   13.23    4.12
 -12  -9   3   11.10    2.39
  11   9  -3   52.01    3.41
 -11  -9   3   51.55    2.23
  10   9  -3    2.03    3.05
 -10  -9   3    2.34    1.93
   9   9  -3    4.92    2.68
  -9  -9   3    4.22    1.71
   8   9  -3  157.93    2.90
  -8  -9   3  161.14    2.33
   7   9  -3    1.75    2.10
  -7  -9   3    2.04    1.47
   6   9  -3   13.74    2.29
   5   9  -3   24.25    1.92
  -5  -9   3   23.35    1.28
   4   9  -3   12.49    2.05
  -4  -9   3   10.55    1.58
   3   9  -3   48.55    1.75
  -3  -9   3   49.77    1.57
   2   9  -3   37.00    1.82
   2   9  -3   34.98    2.29
  -2  -9   3   36.73    2.23
   1   9  -3   79.88    2.02
  -1  -9   3   77.96    1.74
   0   9  -3   82.47    1.47
   0  -9   3   84.08    1.90
  -1   9  -3  240.62    4.12
   1  -9   3  244.44    4.17
  -2   9  -3   40.71    1.79
   2  -9   3   42.21    1.68
  -3   9  -3  554.05   11.14
  -4   9  -3    3.05    0.84
  -4   9  -3    2.58    0.54
  -6   9  -3   23.66    1.41
  -7   9  -3   83.91    3.67
  -8   9  -3    0.42    0.71
  -9   9  -3   10.39    0.87
 -10   9  -3   68.82    2.38
 -11   9  -3   64.79    2.53
 -12   9  -3   42.15    2.39
 -13   9  -3    4.25    1.22
 -13   9  -3    5.34    1.81
 -14   9  -3    1.47    2.02
 -14   9  -3    2.83    1.38
 -15   9  -3   17.79    1.83
 -15   9  -3   19.45    2.65
 -16   9  -3    1.28    1.58
 -16   9  -3    1.97    2.40
 -17   9  -3    4.77    2.17
 -17   9  -3    4.36    2.65
 -18   9  -3   11.28    3.00
 -18   9  -3   12.66    2.45
  14   8  -3    2.65    4.35
 -14  -8   3   -0.59    2.78
  13   8  -3    1.02    3.78
 -13  -8   3    1.88    2.37
  12   8  -3    0.48    3.36
 -12  -8   3    0.80    2.15
  11   8  -3   16.69    3.09
 -11  -8   3   18.99    1.90
  10   8  -3   25.51    3.20
 -10  -8   3   27.38    2.07
   9   8  -3  127.92    3.02
  -9  -8   3  128.82    2.01
   8   8  -3    7.69    2.15
  -8  -8   3   10.56    1.46
   7   8  -3  144.12    2.80
  -7  -8   3  148.84    2.43
   6   8  -3   26.07    1.89
  -6  -8   3   25.27    1.19
   5   8  -3  287.41    4.67
  -5  -8   3  283.37    4.17
   4   8  -3  127.69    4.43
  -4  -8   3  130.15    4.05
   3   8  -3   12.82    1.40
   2   8  -3   72.03    1.62
   2   8  -3   71.43    2.10
  -2  -8   3   70.55    1.95
   1   8  -3   76.30    0.75
   1   8  -3   76.40    0.88
   1   8  -3   76.43    1.21
  -1  -8   3   76.13    1.13
   0   8  -3    7.32    1.08
   0   8  -3    6.88    1.28
   0  -8   3    7.67    1.29
  -1   8  -3    8.92    0.76
   1  -8   3    8.00    0.73
  -2   8  -3   17.51    0.93
   2  -8   3   16.85    0.82
  -3   8  -3 1685.91   39.09
  -3   8  -3 1665.85   39.01
  -4   8  -3   93.82    3.59
  -4   8  -3   96.02    3.50
  -5   8  -3   28.08    0.94
   5  -8   3   27.96    0.83
  -6   8  -3    2.01    0.56
  -7   8  -3  111.02    4.97
  -8   8  -3   16.97    0.93
  -9   8  -3   16.39    1.23
 -10   8  -3   40.48    1.90
 -11   8  -3   89.70    3.55
 -12   8  -3    7.15    1.12
 -13   8  -3    8.30    1.96
 -13   8  -3    8.53    1.33
 -14   8  -3    7.95    1.41
 -14   8  -3    9.70    2.18
 -15   8  -3   30.76    2.46
 -15   8  -3   29.93    1.73
 -16   8  -3    4.67    1.79
 -16   8  -3    4.22    2.40
 -17   8  -3   17.15    2.29
 -17   8  -3   14.48    2.78
 -18   8  -3    2.39    2.82
 -18   8  -3    2.54    2.38
 -15  -7   3    5.32    2.70
  14   7  -3    3.87    4.25
  13   7  -3    0.29    3.63
 -13  -7   3    3.04    2.20
  12   7  -3   12.80    3.21
 -12  -7   3   14.48    2.12
  11   7  -3   44.36    3.17
 -11  -7   3   42.27    1.85
 -10  -7   3   76.09    2.04
   9   7  -3   22.19    2.38
  -9  -7   3   21.62    1.47
   8   7  -3    5.87    2.26
   7   7  -3  115.45    3.47
  -7  -7   3  114.51    2.72
  -4  -7   3   91.57    3.17
   3   7  -3    1.46    1.15
  -3  -7   3    0.47    0.81
   2   7  -3   13.26    1.56
  -2  -7   3   13.27    1.75
   1   7  -3   43.33    1.11
   1   7  -3   42.61    0.78
   1   7  -3   43.30    0.66
  -1  -7   3   43.35    0.97
   0   7  -3  137.43    3.35
   0   7  -3  137.99    3.27
   0  -7   3  133.75    3.38
  -1   7  -3    1.99    0.65
   1  -7   3    1.37    0.64
  -2   7  -3  445.39    8.57
   2  -7   3  443.68    8.54
  -3   7  -3  140.12    4.40
  -3   7  -3  147.11    4.34
  -4   7  -3   18.83    0.46
  -5   7  -3   77.39    2.87
   5  -7   3   79.46    2.86
  -6   7  -3    0.15    0.54
  -7   7  -3   13.96    1.21
  -8   7  -3   58.07    1.92
  -9   7  -3  116.22    4.59
 -10   7  -3   39.88    1.50
 -11   7  -3   71.48    3.44
 -12   7  -3    5.05    1.74
 -12   7  -3    4.75    1.11
 -13   7  -3   13.18    2.00
 -13   7  -3   12.12    1.35
 -14   7  -3    0.15    1.77
 -14   7  -3    0.62    1.37
 -15   7  -3   39.74    3.14
 -15   7  -3   39.43    3.67
 -16   7  -3    1.71    1.82
 -16   7  -3    1.44    2.29
 -17   7  -3    9.69    2.79
 -17   7  -3    9.02    2.34
 -18   7  -3   -0.46    2.75
 -18   7  -3    3.17    2.33
 -15  -6   3    7.60    2.59
  14   6  -3    3.36    3.70
 -14  -6   3    6.00    2.26
  13   6  -3    3.35    3.06
 -13  -6   3    6.88    2.03
  12   6  -3    4.04    3.04
 -12  -6   3    5.69    1.92
  11   6  -3    2.93    2.92
 -11  -6   3    2.58    1.68
  10   6  -3   39.12    3.32
 -10  -6   3   37.64    2.50
   9   6  -3   41.31    2.19
  -9  -6   3   41.45    1.20
   8   6  -3   11.16    2.14
  -8  -6   3   13.73    1.52
   7   6  -3    2.58    1.84
  -6  -6   3  171.92    3.14
   5   6  -3  147.71    3.17
  -5  -6   3  150.38    2.58
  -3  -6   3  305.03    9.29
   2   6  -3  212.24    5.67
   2   6  -3  207.19    5.60
  -2  -6   3  206.63    5.68
   1   6  -3   31.09    1.01
  -1  -6   3   30.95    1.02
   0   6  -3    8.56    0.94
   0  -6   3    8.40    1.16
  -1   6  -3   75.62    2.08
  -1   6  -3   77.53    2.17
   1  -6   3   75.89    2.04
  -2   6  -3   87.06    2.39
  -2   6  -3   87.72    2.48
  -3   6  -3    3.31    0.58
  -4   6  -3   50.93    1.80
   4  -6   3   51.33    1.79
  -5   6  -3  292.93    9.01
   5  -6   3  295.62    9.00
  -7   6  -3   61.58    1.54
  -8   6  -3    5.40    0.82
  -9   6  -3   69.05    2.97
 -10   6  -3    2.24    1.34
 -10   6  -3    1.58    0.92
 -11   6  -3  371.62   12.06
 -11   6  -3  382.77   12.32
 -12   6  -3   23.99    1.53
 -12   6  -3   25.16    2.10
 -13   6  -3    0.42    1.65
 -13   6  -3   -0.22    1.22
 -14   6  -3    2.64    1.51
 -14   6  -3    2.22    1.80
 -15   6  -3   15.72    1.91
 -15   6  -3   13.39    2.35
 -16   6  -3   -0.13    2.29
 -16   6  -3    0.57    1.86
 -17   6  -3    0.17    2.09
 -17   6  -3    0.94    2.58
 -18   6  -3    5.77    2.91
 -18   6  -3    4.79    2.52
 -16  -5   3    3.11    2.71
 -15  -5   3    1.95    2.54
 -14  -5   3    2.61    2.06
  13   5  -3    9.13    2.91
 -13  -5   3    9.57    1.66
  12   5  -3   10.75    2.91
 -12  -5   3    9.87    1.62
  11   5  -3   14.20    2.92
  10   5  -3  126.45    5.70
 -10  -5   3  120.39    4.71
   9   5  -3   96.02    3.53
  -9  -5   3   92.32    2.36
   8   5  -3    4.60    1.90
  -8  -5   3    7.44    1.12
   7   5  -3    3.67    1.78
   6   5  -3   74.40    2.00
  -6  -5   3   75.64    1.51
  -5  -5   3   88.97    2.21
  -4  -5   3   13.35    1.49
   3   5  -3 1003.05   19.34
   3   5  -3  984.30   19.12
  -3  -5   3  999.79   19.14
   2   5  -3  937.03   29.02
   2   5  -3  923.66   28.97
   2   5  -3  918.40   29.14
  -2  -5   3  927.20   28.99
   1   5  -3   11.58    0.46
   1   5  -3   10.99    0.59
  -1  -5   3   11.31    0.60
   0   5  -3  101.13    1.92
   0   5  -3  103.15    1.82
   0  -5   3  102.07    1.91
  -1   5  -3   14.70    1.11
  -1   5  -3   15.91    1.00
   1  -5   3   16.31    0.96
  -2   5  -3   66.61    1.24
  -3   5  -3   83.20    1.61
   3  -5   3   81.97    1.59
  -4   5  -3   34.76    0.87
   4  -5   3   34.78    0.84
  -5   5  -3   27.88    0.69
   5  -5   3   27.46    0.63
  -6   5  -3  102.23    2.58
  -7   5  -3    0.69    0.60
  -8   5  -3    0.16    0.64
  -8   5  -3   -0.15    1.02
  -9   5  -3    4.21    0.80
  -9   5  -3    3.74    1.04
 -10   5  -3  286.25    9.09
 -10   5  -3  288.38    8.90
 -11   5  -3   68.63    3.07
 -11   5  -3   71.78    2.76
 -12   5  -3   62.25    3.16
 -12   5  -3   61.21    2.85
 -13   5  -3   34.34    2.15
 -13   5  -3   32.62    1.69
 -14   5  -3   19.96    2.30
 -14   5  -3   18.35    1.85
 -15   5  -3    2.24    2.06
 -16   5  -3    8.61    2.31
 -16   5  -3    8.66    1.94
 -17   5  -3   19.25    3.03
 -18   5  -3    4.39    2.51
 -18   5  -3    5.21    3.08
 -16  -4   3    2.55    2.71
 -15  -4   3    0.47    2.19
 -14  -4   3   25.16    2.03
  13   4  -3    5.12    2.81
 -13  -4   3    5.43    1.62
  12   4  -3   24.59    2.77
  11   4  -3    7.61    2.39
 -11  -4   3    7.47    1.32
  10   4  -3   99.40    4.20
 -10  -4   3   96.77    2.99
   9   4  -3  292.59    6.34
  -9  -4   3  298.39    5.68
  -8  -4   3  124.41    3.56
   7   4  -3    1.20    1.48
  -7  -4   3    0.95    0.78
   6   4  -3   11.17    1.33
  -6  -4   3   11.34    0.73
   5   4  -3   12.27    2.34
  -5  -4   3   15.84    1.74
   4   4  -3    1.72    0.45
   4   4  -3    2.50    1.05
  -4  -4   3    1.59    0.49
   3   4  -3  113.24    4.39
   3   4  -3  108.63    4.65
  -3  -4   3  115.93    4.42
  -3  -4   3  109.79    4.61
   2   4  -3  107.03    4.70
  -2  -4   3  110.11    4.62
  -2  -4   3  112.07    4.80
  -2  -4   3  107.62    4.60
   1   4  -3   25.14    1.49
   1   4  -3   25.36    1.64
   1   4  -3   24.72    1.80
  -1  -4   3   24.86    1.53
   0   4  -3  377.98    5.59
   0   4  -3  376.39    5.70
   0  -4   3  371.01    5.62
   0  -4   3  377.29    5.69
  -1   4  -3  164.64    6.09
  -1   4  -3  160.21    5.94
   1  -4   3  162.22    6.08
  -2   4  -3  286.61    6.92
  -2   4  -3  289.95    7.06
   2  -4   3  289.28    6.92
  -3   4  -3    1.82    0.28
   3  -4   3    1.97    0.28
  -4   4  -3   16.47    0.81
  -4   4  -3   16.36    0.52
   4  -4   3   16.17    0.50
  -5   4  -3  232.02    4.71
  -6   4  -3   11.55    1.36
  -6   4  -3   11.17    1.02
  -7   4  -3    3.50    0.87
  -7   4  -3    3.57    0.64
  -8   4  -3    7.84    0.93
  -8   4  -3    8.27    1.29
  -9   4  -3    9.33    1.05
  -9   4  -3    9.80    0.81
 -10   4  -3  168.16    4.97
 -10   4  -3  172.41    4.82
 -11   4  -3   -0.26    1.26
 -11   4  -3    0.04    0.96
 -12   4  -3  147.88    4.28
 -12   4  -3  147.40    4.01
 -13   4  -3   82.59    3.41
 -13   4  -3   83.99    3.16
 -14   4  -3    9.73    1.90
 -14   4  -3   10.89    1.51
 -15   4  -3    3.74    2.13
 -15   4  -3    2.04    1.80
 -16   4  -3   16.04    2.49
 -17   4  -3    3.47    2.41
 -18   4  -3   -0.30    2.39
 -17  -3   3   16.86    2.71
 -16  -3   3    5.31    2.16
 -15  -3   3   38.87    2.40
 -14  -3   3   11.63    2.00
 -13  -3   3   38.22    1.51
  12   3  -3   20.58    2.66
 -12  -3   3   18.90    1.52
  11   3  -3   21.84    2.78
 -11  -3   3   21.47    1.72
  10   3  -3    3.86    2.01
 -10  -3   3    3.00    1.06
   9   3  -3  125.61    3.56
  -9  -3   3  128.10    2.72
   8   3  -3  178.48    4.73
  -8  -3   3  177.82    4.15
   7   3  -3   72.23    2.67
  -7  -3   3   70.18    1.91
  -6  -3   3   53.84    2.57
   5   3  -3    6.09    1.13
  -5  -3   3    6.08    0.50
   4   3  -3  333.15    7.75
   4   3  -3  331.05    7.51
  -4  -3   3  325.11    7.50
  -4  -3   3  323.32    7.64
   3   3  -3  316.09    8.36
   3   3  -3  319.96    8.18
  -3  -3   3  314.69    8.18
  -3  -3   3  313.15    8.32
   2   3  -3   56.61    1.49
  -2  -3   3   57.07    1.51
  -2  -3   3   58.78    1.75
  -2  -3   3   57.78    1.61
   1   3  -3  211.40    7.26
   1   3  -3  217.57    7.25
   1   3  -3  211.01    7.12
  -1  -3   3  211.70    7.12
  -1  -3   3  219.71    7.22
   0   3  -3   15.87    0.80
   0  -3   3   15.87    0.76
  -1   3  -3    1.13    0.47
   1  -3   3    0.95    0.41
  -2   3  -3    8.90    0.39
  -2   3  -3    8.98    0.65
   2  -3   3    8.82    0.58
   2  -3   3    9.10    0.39
  -3   3  -3  148.86    2.81
  -3   3  -3  150.35    2.97
   3  -3   3  146.42    2.80
  -4   3  -3  435.59   13.98
  -4   3  -3  443.89   13.88
   4  -3   3  443.60   13.88
  -5   3  -3  384.37   14.77
  -5   3  -3  382.65   14.88
   5  -3   3  374.51   14.77
  -6   3  -3   22.21    1.47
  -7   3  -3   21.47    0.94
  -8   3  -3   36.39    1.59
  -8   3  -3   35.75    1.37
  -9   3  -3   77.76    3.64
  -9   3  -3   76.97    3.79
 -11   3  -3   12.98    1.30
 -11   3  -3   13.72    1.06
 -12   3  -3   74.94    3.03
 -12   3  -3   73.16    2.68
 -13   3  -3   64.52    2.39
 -13   3  -3   66.61    2.25
 -14   3  -3   31.58    2.23
 -14   3  -3   34.55    2.99
 -15   3  -3    2.78    2.43
 -15   3  -3    4.20    1.91
 -16   3  -3   78.82    3.85
 -16   3  -3   78.14    4.34
 -17   3  -3    1.75    2.49
 -17   3  -3    1.89    2.76
 -17  -2   3   30.25    2.70
 -16  -2   3    4.88    2.25
 -15  -2   3    6.43    2.01
 -14  -2   3   11.01    2.31
 -13  -2   3    3.20    1.56
 -12  -2   3   32.21    2.56
  11   2  -3   32.59    2.39
 -11  -2   3   34.74    1.44
 -10  -2   3   24.23    1.21
   9   2  -3    3.70    1.99
  -9  -2   3    3.93    1.11
   8   2  -3    5.57    1.64
  -8  -2   3    4.66    0.84
   7   2  -3   31.58    2.38
  -7  -2   3   29.78    1.62
   6   2  -3    1.14    1.20
   5   2  -3  245.37    6.71
   5   2  -3  241.51    6.47
  -5  -2   3  243.49    6.65
  -5  -2   3  242.94    6.47
   4   2  -3   36.41    1.49
   4   2  -3   37.34    1.23
  -4  -2   3   38.48    1.54
  -4  -2   3   36.16    1.23
  -4  -2   3   36.70    1.71
   3   2  -3  194.54    3.84
   3   2  -3  192.32    3.85
   3   2  -3  193.11    3.64
  -3  -2   3  192.51    3.77
  -3  -2   3  190.12    3.63
   2   2  -3  204.50    7.71
  -2  -2   3  211.12    7.84
   1   2  -3  666.91   13.87
   1   2  -3  665.00   13.77
  -1  -2   3  674.07   13.91
  -1  -2   3  659.69   13.77
   0   2  -3  153.25    5.31
   0  -2   3  149.24    5.29
  -1   2  -3   11.37    0.27
  -1   2  -3   10.87    0.52
   1  -2   3   11.06    0.48
   1  -2   3   11.24    0.25
  -2   2  -3  279.32    8.06
  -2   2  -3  273.82    7.93
   2  -2   3  274.44    7.94
   2  -2   3  277.23    8.05
  -3   2  -3  837.59   26.43
  -3   2  -3  837.01   26.52
   3  -2   3  846.75   26.51
   3  -2   3  842.15   26.43
  -4   2  -3   41.84    1.49
  -4   2  -3   40.16    1.63
   4  -2   3   42.51    1.47
  -5   2  -3  279.74    6.11
  -5   2  -3  286.94    6.02
   5  -2   3  286.53    6.02
  -6   2  -3   77.62    2.25
  -6   2  -3   76.83    2.40
  -7   2  -3   13.12    0.92
  -7   2  -3   12.93    0.72
  -8   2  -3   81.30    2.69
  -8   2  -3   81.42    2.52
  -9   2  -3   23.48    1.50
  -9   2  -3   23.65    1.26
 -10   2  -3  158.50    6.10
 -10   2  -3  154.63    5.93
 -11   2  -3    1.50    1.39
 -11   2  -3    2.31    1.18
 -12   2  -3    8.56    1.29
 -12   2  -3    7.66    1.47
 -13   2  -3    8.93    1.55
 -13   2  -3    7.84    1.89
 -14   2  -3   48.40    3.84
 -14   2  -3   46.36    3.34
 -15   2  -3   13.46    2.19
 -15   2  -3   11.80    1.80
 -16   2  -3   13.65    2.43
 -16   2  -3   15.12    2.71
 -17   2  -3    2.87    2.29
 -17  -1   3    0.18    2.15
 -16  -1   3    8.09    2.18
 -15  -1   3   19.60    1.80
 -14  -1   3    9.54    1.71
 -13  -1   3    1.67    1.37
 -12  -1   3   18.41    2.61
 -12  -1   3   19.34    1.30
  11   1  -3   62.82    2.96
 -11  -1   3   61.39    2.13
 -11  -1   3   59.69    2.95
  10   1  -3   76.19    2.72
 -10  -1   3   74.94    1.94
   9   1  -3  329.88    9.55
  -9  -1   3  341.03    9.13
  -9  -1   3  332.83    9.46
   8   1  -3   17.26    2.15
  -8  -1   3   16.35    1.50
   7   1  -3    5.28    1.31
  -7  -1   3    5.16    0.63
  -7  -1   3    5.06    1.23
  -6  -1   3  110.18    4.11
   5   1  -3    3.60    0.91
   5   1  -3    3.27    0.99
   5   1  -3    3.49    0.56
  -5  -1   3    3.39    0.98
  -5  -1   3    3.76    0.57
  -5  -1   3    3.02    0.89
   4   1  -3   94.09    2.63
   4   1  -3   96.46    2.43
   4   1  -3   96.49    2.65
  -4  -1   3   96.53    2.61
  -4  -1   3   95.12    2.74
  -4  -1   3   95.42    2.44
   3   1  -3   13.57    0.57
  -3  -1   3   12.82    0.60
  -3  -1   3   13.50    0.99
   2   1  -3   60.51    1.05
  -2  -1   3   60.47    1.06
  -2  -1   3   60.89    1.56
   1   1  -3  144.88    3.92
   1   1  -3  147.51    4.01
  -1  -1   3  145.37    3.92
   0   1  -3  886.87    6.85
   0  -1   3  881.11    6.86
   0  -1   3  878.84    6.99
  -1   1  -3  327.93   11.79
   1  -1   3  333.69   11.78
   1  -1   3  340.98   11.90
  -2   1  -3  197.83    5.06
  -2   1  -3  195.28    4.93
   2  -1   3  199.98    5.03
   2  -1   3  194.57    4.92
  -3   1  -3   12.25    1.15
  -3   1  -3   12.84    1.32
   3  -1   3   11.94    1.12
   3  -1   3   12.06    1.25
  -4   1  -3   31.94    0.44
  -4   1  -3   31.92    0.61
   4  -1   3   32.48    0.53
   4  -1   3   31.44    0.34
  -5   1  -3   28.97    0.84
  -5   1  -3   29.34    1.12
  -6   1  -3  193.91    7.19
  -6   1  -3  186.22    7.09
  -7   1  -3    4.36    0.86
  -7   1  -3    5.41    1.08
  -8   1  -3   46.86    1.76
  -8   1  -3   46.03    1.59
  -9   1  -3  130.05    4.65
  -9   1  -3  134.43    4.79
 -10   1  -3    7.45    1.27
 -10   1  -3    7.60    1.49
 -11   1  -3    8.32    1.48
 -11   1  -3   10.14    1.70
 -12   1  -3    9.04    1.79
 -12   1  -3    9.18    1.51
 -13   1  -3   29.84    2.11
 -13   1  -3   29.12    1.80
 -14   1  -3   41.11    2.45
 -14   1  -3   40.77    2.28
 -15   1  -3    1.64    2.00
 -16   1  -3    0.44    2.35
 -17   1  -3    3.95    2.58
 -18   0   3    1.53    2.54
 -17   0   3    6.60    2.49
 -16   0   3   15.08    2.28
 -15   0   3   14.78    1.96
 -15   0   3   14.58    1.98
 -14   0   3    4.76    1.69
 -13   0   3    3.20    1.38
 -12   0   3  101.09    2.89
 -11   0   3    0.03    1.04
   9   0  -3  218.62    6.81
  -9   0   3  215.83    6.80
  -9   0   3  224.76    6.37
   8   0  -3   71.83    2.60
  -8   0   3   70.69    2.58
  -8   0   3   71.51    1.90
   7   0  -3   38.01    2.07
   6   0  -3  107.50    3.94
  -6   0   3  105.27    3.61
  -6   0   3  105.12    3.93
   5   0  -3   82.50    1.46
  -5   0   3   84.32    1.95
  -5   0   3   83.98    1.73
  -5   0   3   82.68    1.49
   4   0  -3  105.95    3.00
   4   0  -3  104.11    3.18
   4   0  -3  106.75    3.27
  -4   0   3  107.81    3.31
  -4   0   3  104.84    3.14
  -4   0   3  104.71    3.01
   3   0  -3   22.35    0.40
   3   0  -3   21.88    0.63
   3   0  -3   23.01    0.90
  -3   0   3   22.35    0.43
  -3   0   3   22.69    0.88
  -3   0   3   22.07    0.61
   2   0  -3   18.19    0.87
   2   0  -3   17.98    1.48
   2   0  -3   16.95    1.03
  -2   0   3   18.33    0.88
  -2   0   3   18.91    1.43
   1   0  -3  319.88    3.98
   1   0  -3  318.21    3.70
   1   0  -3  319.81    3.70
  -1   0   3  320.16    3.70
  -1   0  -3   25.45    1.51
   1   0   3   25.16    1.47
  -2   0  -3  404.86   11.79
   2   0   3  407.90   11.87
   2   0   3  407.86   11.79
  -3   0  -3   31.00    1.34
  -3   0  -3   31.46    1.16
   3   0   3   32.20    1.25
   3   0   3   30.89    1.12
  -4   0  -3  129.61    3.76
  -4   0  -3  131.89    3.61
  -4   0  -3  133.87    3.72
   4   0   3  130.36    3.59
   4   0   3  131.97    3.63
  -5   0  -3    6.47    0.74
  -5   0  -3    6.82    0.63
  -6   0  -3   67.78    1.76
  -6   0  -3   67.59    1.90
  -7   0  -3   38.40    1.91
  -7   0  -3   40.50    1.82
  -8   0  -3  110.67    2.32
  -8   0  -3  110.86    2.48
  -9   0  -3  104.37    2.77
  -9   0  -3  102.41    2.59
 -10   0  -3   70.40    2.78
 -10   0  -3   68.36    2.57
 -11   0  -3   77.85    2.54
 -11   0  -3   80.05    2.78
 -12   0  -3   31.57    1.57
 -13   0  -3    5.16    1.65
 -14   0  -3   12.14    1.78
 -15   0  -3    0.83    2.23
 -16   0  -3    0.56    2.32
 -18   1   3    1.10    2.39
 -17   1   3    0.43    2.13
 -17   1   3    2.57    2.19
 -16   1   3    9.87    1.96
 -16   1   3   10.86    1.90
 -15   1   3    3.61    1.66
 -14   1   3    0.83    1.51
 -13   1   3   17.39    1.47
 -12   1   3    8.53    1.42
 -11   1   3   19.07    1.92
 -10   1   3   63.49    2.32
  -9   1   3   11.19    1.01
  -8   1   3   80.61    2.00
  -8   1   3   79.00    2.78
   7  -1  -3  618.11   16.54
  -7   1   3  605.45   16.60
  -7   1   3  614.34   16.33
   6  -1  -3   74.02    2.62
  -6   1   3   70.24    2.77
  -6   1   3   73.65    2.26
   5  -1  -3   47.90    1.92
   5  -1  -3   45.54    2.20
  -5   1   3   47.58    2.38
   4  -1  -3 1047.98   28.05
   4  -1  -3 1047.48   27.96
   4  -1  -3 1030.27   28.14
  -4   1   3 1033.17   28.01
  -4   1   3 1032.44   28.17
  -4   1   3 1026.57   27.96
   3  -1  -3  654.08   23.76
   3  -1  -3  660.45   23.81
   3  -1  -3  653.58   23.96
  -3   1   3  661.11   23.99
  -3   1   3  653.87   23.80
  -3   1   3  647.37   23.77
   2  -1  -3  345.57    9.04
   2  -1  -3  348.59    9.28
  -2   1   3  345.16    9.02
  -2   1   3  349.32    9.28
  -2   1   3  347.00    9.03
   1  -1  -3  669.32    6.66
   1  -1  -3  670.77    6.90
  -1   1   3  671.33    6.67
  -1   1   3  669.07    6.87
   0  -1  -3   14.01    0.73
   0   1   3   13.95    0.67
  -1  -1  -3  519.86   14.03
   1   1   3  516.34   14.01
  -2  -1  -3    5.33    0.52
  -2  -1  -3    5.82    0.61
   2   1   3    5.57    0.46
  -3  -1  -3    1.39    0.51
   3   1   3    1.42    0.44
   3   1   3    1.26    0.54
  -4  -1  -3  684.75   14.97
  -4  -1  -3  690.18   14.89
  -5  -1  -3   13.84    1.04
   5   1   3   13.59    0.76
  -6  -1  -3   38.56    1.71
  -6  -1  -3   38.22    1.90
  -7  -1  -3   67.45    2.00
  -7  -1  -3   70.04    2.22
  -8  -1  -3   41.69    1.15
  -9  -1  -3    1.93    1.11
 -10  -1  -3   38.53    2.33
 -11  -1  -3    2.94    1.38
 -12  -1  -3    7.29    1.61
 -13  -1  -3   19.69    1.84
 -14  -1  -3   24.95    2.46
 -15  -1  -3   10.33    2.68
 -16  -1  -3    0.95    2.55
 -18   2   3    0.70    2.32
 -17   2   3    4.15    2.00
 -17   2   3    4.46    2.27
 -16   2   3    3.18    1.91
 -15   2   3   23.43    2.00
 -14   2   3   37.08    1.90
 -13   2   3   13.15    1.56
 -12   2   3    3.19    1.12
 -11   2   3   84.96    3.03
 -10   2   3   23.13    1.32
  -9   2   3  160.18    4.50
  -8   2   3   10.37    0.77
  -7   2   3  427.16   12.53
  -7   2   3  433.89   12.20
  -6   2   3   16.10    1.53
  -6   2   3   16.00    0.93
   5  -2  -3  411.59   10.37
  -5   2   3  425.91   10.70
   4  -2  -3  475.74   13.65
   4  -2  -3  484.82   13.90
  -4   2   3  492.50   13.71
  -4   2   3  487.25   13.94
   3  -2  -3   25.75    1.40
   3  -2  -3   26.45    0.85
  -3   2   3   26.18    0.86
  -3   2   3   26.00    1.40
   2  -2  -3   65.79    1.84
   2  -2  -3   65.53    1.48
  -2   2   3   66.04    1.47
  -2   2   3   65.25    1.80
   1  -2  -3  131.31    2.46
   1  -2  -3  131.91    2.73
  -1   2   3  132.27    2.46
  -1   2   3  131.35    2.72
   0  -2  -3   21.26    1.93
   0  -2  -3   22.93    1.43
   0  -2  -3   21.07    1.69
   0   2   3   21.70    1.62
   0   2   3   22.47    1.93
  -1  -2  -3   10.91    0.59
  -1  -2  -3   12.44    0.95
   1   2   3   11.55    0.51
  -2  -2  -3   36.27    2.55
   2   2   3   36.63    2.59
   3   2   3  250.01    3.92
  -4  -2  -3  402.98    6.98
  -4  -2  -3  410.31    6.91
   4   2   3  414.82    6.86
   4   2   3  407.39    7.05
   5   2   3   88.89    1.50
  -6  -2  -3    1.90    0.93
  -7  -2  -3  281.47    4.22
  -8  -2  -3   21.32    1.69
  -9  -2  -3    5.80    1.22
 -10  -2  -3   21.88    1.62
 -11  -2  -3   14.60    1.57
 -12  -2  -3    8.94    1.93
 -13  -2  -3    3.77    1.97
 -14  -2  -3   17.75    2.12
 -15  -2  -3   52.55    2.81
 -16  -2  -3    0.07    2.58
 -18   3   3    1.22    2.57
 -18   3   3    0.81    2.34
 -17   3   3    2.18    2.08
 -16   3   3   11.03    1.90
 -15   3   3    7.78    1.68
 -14   3   3    1.72    1.48
 -13   3   3    2.79    1.32
 -12   3   3   13.44    1.21
 -11   3   3    5.88    1.19
 -10   3   3    2.15    0.91
  -9   3   3   10.98    1.18
  -8   3   3   79.77    2.97
  -7   3   3   10.99    0.91
  -6   3   3  174.76    5.50
  -6   3   3  174.83    5.95
   5  -3  -3   78.40    3.69
  -5   3   3   81.71    4.21
  -5   3   3   82.37    3.83
  -5   3   3   77.24    3.71
   4  -3  -3 1025.06   28.12
   4  -3  -3 1007.23   28.38
  -4   3   3 1001.39   28.12
  -4   3   3 1017.69   28.42
   3  -3  -3   93.76    4.27
  -3   3   3   96.74    4.02
  -3   3   3   95.35    4.33
   2  -3  -3    5.66    0.92
   2  -3  -3    6.01    0.61
  -2   3   3    6.43    0.62
  -2   3   3    6.35    1.02
   1  -3  -3  729.78   23.34
   1  -3  -3  729.97   23.21
  -1   3   3  728.00   23.36
  -1   3   3  725.51   23.22
   0  -3  -3  155.80    3.83
   0  -3  -3  152.56    3.69
   0  -3  -3  158.05    3.52
   0   3   3  152.62    3.82
  -1  -3  -3  134.90    4.85
  -1  -3  -3  132.89    4.73
  -2  -3  -3  313.12    7.29
  -2  -3  -3  304.96    7.12
   2   3   3  307.61    7.15
   2   3   3  310.91    7.12
  -3  -3  -3    1.79    1.01
   3   3   3    2.47    1.00
  -4  -3  -3   25.92    0.89
   5   3   3   52.22    1.63
  -6  -3  -3  168.24    3.98
   6   3   3  168.37    4.34
  -7  -3  -3  101.58    2.55
   7   3   3  100.29    3.17
  -8  -3  -3    1.38    1.18
  -9  -3  -3    8.78    1.40
 -10  -3  -3   15.22    1.66
 -11  -3  -3    3.59    1.79
 -12  -3  -3   25.26    1.96
 -13  -3  -3    1.87    2.01
 -14  -3  -3    4.67    2.28
 -15  -3  -3    4.90    2.63
 -19   4   3    1.81    2.81
 -19   4   3    0.11    2.46
 -18   4   3    8.84    2.43
 -17   4   3    3.43    2.00
 -16   4   3    0.41    1.70
 -15   4   3   23.83    1.66
 -14   4   3    8.02    1.51
 -13   4   3    0.31    1.19
 -12   4   3    2.04    1.15
 -11   4   3   89.03    2.89
 -10   4   3   18.56    1.48
  -9   4   3   24.93    1.36
  -8   4   3    2.83    0.73
  -7   4   3    8.93    0.85
  -5   4   3  107.91    1.62
  -5   4   3  107.40    2.28
  -4   4   3    2.47    1.16
  -4   4   3    1.42    0.61
  -4   4   3    1.40    0.43
   3  -4  -3 1122.47   28.67
  -3   4   3 1133.19   28.73
  -3   4   3 1130.19   28.48
   2  -4  -3  835.63   24.95
   2  -4  -3  830.26   25.11
  -2   4   3  838.29   25.17
   1  -4  -3   94.53    1.71
   1  -4  -3   93.84    1.46
  -1   4   3   92.70    1.44
  -1   4   3   93.32    1.68
  -1   4   3   92.11    1.12
   0  -4  -3   71.68    3.29
   0  -4  -3   68.63    3.20
   0   4   3   72.00    3.37
   0   4   3   68.27    3.13
   0   4   3   73.76    2.99
  -1  -4  -3    2.09    0.65
  -1  -4  -3    1.79    0.81
  -1  -4  -3    1.31    0.91
   1   4   3    2.52    0.64
   1   4   3    2.13    0.71
   1   4   3    2.40    1.06
  -2  -4  -3    6.42    0.68
  -2  -4  -3    7.05    0.83
  -2  -4  -3    6.70    0.95
   2   4   3    7.24    0.83
   2   4   3    6.36    0.93
  -3  -4  -3    7.50    1.53
   3   4   3    8.36    1.48
  -5  -4  -3   54.58    1.05
   5   4   3   54.73    1.58
  -6  -4  -3  192.20    4.11
   6   4   3  186.93    4.48
  -7  -4  -3   59.59    1.56
   7   4   3   57.99    2.05
  -8  -4  -3    4.62    1.38
   8   4   3    4.47    2.14
  -9  -4  -3    4.99    1.65
 -10  -4  -3   44.05    3.18
 -11  -4  -3    7.49    1.74
 -12  -4  -3   11.53    2.17
 -13  -4  -3   -0.58    2.23
 -14  -4  -3    1.70    2.51
 -15  -4  -3    2.61    2.69
 -19   5   3   24.44    2.95
 -19   5   3   23.71    3.27
 -18   5   3    0.65    2.13
 -17   5   3    9.20    1.90
 -16   5   3   61.02    2.58
 -15   5   3    0.49    1.56
 -14   5   3   10.50    1.78
 -13   5   3   16.06    1.44
 -12   5   3   56.41    3.00
 -11   5   3  245.72    7.77
 -10   5   3  177.65    7.09
  -9   5   3  143.45    5.18
  -8   5   3   26.53    1.05
  -7   5   3  251.46    6.43
  -6   5   3   83.12    2.68
  -5   5   3    9.18    0.84
  -4   5   3   11.10    0.60
  -4   5   3   11.43    0.43
   3  -5  -3  404.44    6.54
  -3   5   3  404.88    6.88
  -3   5   3  403.83    6.55
   2  -5  -3 1039.01   26.32
   2  -5  -3 1030.02   26.13
  -2   5   3 1039.37   26.36
  -2   5   3 1021.53   26.14
   1  -5  -3   85.87    2.05
   1  -5  -3   85.88    1.86
  -1   5   3   83.42    1.50
  -1   5   3   85.64    2.09
  -1   5   3   84.91    1.79
   0  -5  -3   30.52    1.81
   0  -5  -3   28.85    1.70
   0   5   3   29.73    1.89
  -1  -5  -3  189.89    3.87
  -1  -5  -3  188.31    4.04
  -1  -5  -3  189.48    4.05
   1   5   3  189.78    3.87
  -2  -5  -3   11.00    1.34
  -2  -5  -3   10.66    1.14
   2   5   3   11.55    1.25
  -3  -5  -3    2.01    1.01
   3   5   3    2.45    1.18
  -5  -5  -3   85.82    2.47
   5   5   3   86.80    2.83
  -6  -5  -3   66.54    1.92
  -7  -5  -3   17.34    1.45
   7   5   3   19.67    2.31
  -8  -5  -3   35.12    1.70
   8   5   3   32.60    2.28
  -9  -5  -3    6.02    1.62
 -10  -5  -3   11.85    1.93
 -11  -5  -3    1.44    2.16
 -12  -5  -3    7.89    2.24
 -13  -5  -3   28.79    2.73
 -14  -5  -3    1.59    3.00
 -19   6   3    3.77    2.60
 -18   6   3    0.34    2.00
 -17   6   3    3.04    1.87
 -16   6   3   77.45    4.10
 -15   6   3    2.22    1.56
 -14   6   3    1.63    1.51
 -13   6   3   37.42    2.33
 -12   6   3  112.30    3.31
 -11   6   3   17.17    1.51
 -10   6   3  359.34   10.73
  -9   6   3   18.58    1.60
  -8   6   3  276.57    7.07
  -7   6   3   16.57    0.93
  -6   6   3  152.85    4.58
  -5   6   3  309.67    4.41
   3  -6  -3    3.26    0.84
  -3   6   3    2.55    1.30
   2  -6  -3  821.88   16.65
  -2   6   3  811.49   16.89
   1  -6  -3   19.24    2.03
  -1   6   3   21.44    1.71
  -1   6   3   18.65    2.29
   0  -6  -3  121.02    1.89
   0   6   3  122.54    1.53
   0   6   3  122.20    2.08
  -1  -6  -3   72.97    2.34
  -1  -6  -3   75.16    2.27
   1   6   3   71.77    2.52
   1   6   3   73.97    2.01
  -2  -6  -3  108.43    2.79
  -2  -6  -3  109.82    2.82
  -2  -6  -3  108.31    2.91
   2   6   3  110.28    2.84
  -3  -6  -3   17.11    1.30
   3   6   3   18.52    1.41
  -4  -6  -3   43.30    1.61
   4   6   3   43.28    1.83
  -5  -6  -3    3.27    1.32
   5   6   3    3.29    1.78
  -6  -6  -3   62.52    1.92
   6   6   3   65.42    2.57
  -7  -6  -3    1.11    1.51
   7   6   3    1.75    2.24
  -8  -6  -3   26.06    1.51
   8   6   3   28.09    2.62
  -9  -6  -3    0.06    1.98
   9   6   3    2.87    2.88
 -10  -6  -3    9.44    2.11
 -11  -6  -3    4.52    2.33
 -12  -6  -3   18.33    2.68
 -13  -6  -3    6.49    2.78
 -14  -6  -3    7.59    3.00
 -19   7   3    0.81    2.05
 -18   7   3   22.83    2.42
 -17   7   3    1.25    1.90
 -16   7   3   38.03    2.38
 -15   7   3    2.17    1.64
 -14   7   3   20.71    2.01
 -13   7   3  104.75    3.21
 -12   7   3    4.73    1.22
 -11   7   3   22.44    1.56
 -10   7   3  163.34    5.46
  -9   7   3  153.15    4.39
  -8   7   3   11.52    1.02
  -7   7   3    9.40    0.93
  -6   7   3   58.79    2.19
  -5   7   3  533.44   14.36
   4  -7  -3  336.31    5.75
   3  -7  -3  351.91    8.52
   2  -7  -3   82.85    3.59
   1  -7  -3  306.13    4.04
  -1   7   3  304.28    3.79
  -1   7   3  302.58    4.30
   0   7   3   48.72    1.81
   0   7   3   47.93    2.48
  -1  -7  -3   53.66    1.71
   1   7   3   53.62    1.85
   1   7   3   52.73    1.46
  -2  -7  -3    1.32    1.27
   2   7   3    1.86    1.35
   2   7   3    1.25    1.63
  -3  -7  -3  138.98    3.10
   3   7   3  135.72    3.05
  -4  -7  -3    7.85    1.41
   4   7   3    7.74    1.65
  -5  -7  -3    0.74    1.46
  -6  -7  -3   52.77    1.97
   6   7   3   53.87    2.53
   7   7   3    2.12    2.54
   8   7   3   29.19    2.87
  -9  -7  -3    1.56    2.07
   9   7   3    1.60    3.04
 -10  -7  -3   11.32    2.24
 -11  -7  -3   18.02    2.45
 -12  -7  -3    1.48    2.81
 -13  -7  -3    3.35    3.19
 -19   8   3    2.15    2.11
 -18   8   3   14.46    2.47
 -17   8   3   11.18    2.01
 -16   8   3    5.89    1.77
 -15   8   3   59.04    3.44
 -14   8   3   21.30    1.69
 -13   8   3   38.26    2.58
 -12   8   3   15.05    1.60
 -11   8   3    3.61    1.01
 -10   8   3   15.80    0.97
  -9   8   3   35.89    1.54
  -8   8   3  184.93    5.55
  -7   8   3   10.71    0.93
  -6   8   3    7.18    0.63
  -5   8   3  350.31    6.74
   4  -8  -3    1.53    1.05
   3  -8  -3   74.99    3.03
   2  -8  -3  106.70    2.78
   1  -8  -3    4.39    1.34
  -1   8   3    5.88    1.11
   0  -8  -3   22.47    1.77
   0   8   3   20.08    1.91
  -1  -8  -3   30.98    1.70
   1   8   3   29.81    1.53
   1   8   3   30.78    2.02
  -2  -8  -3   13.42    1.61
   2   8   3   12.89    1.92
  -3  -8  -3   34.71    1.60
   3   8   3   36.23    1.79
  -4  -8  -3   62.90    2.33
   4   8   3   63.34    2.49
  -5  -8  -3    0.41    1.69
   5   8   3    1.76    2.27
  -6  -8  -3   24.14    1.81
   6   8   3   23.47    2.40
   7   8   3   47.20    3.06
   8   8   3    1.27    3.07
  -9  -8  -3   60.40    2.70
   9   8   3   56.94    3.51
 -10  -8  -3    2.57    2.53
 -11  -8  -3    1.17    2.62
 -12  -8  -3    5.16    3.05
 -19   9   3    3.56    2.39
 -18   9   3    2.41    1.97
 -17   9   3    2.40    1.92
 -16   9   3    0.11    1.63
 -15   9   3   18.28    2.20
 -14   9   3   17.78    1.90
 -13   9   3   72.43    3.03
 -12   9   3    2.10    1.21
 -11   9   3    3.95    1.17
 -10   9   3   24.23    1.58
  -9   9   3    8.74    0.99
  -8   9   3  302.71    8.61
  -7   9   3    0.70    0.73
  -6   9   3   89.69    2.54
   4  -9  -3  143.76    3.72
   3  -9  -3  115.32    4.87
   2  -9  -3   22.71    1.47
  -2   9   3   23.51    1.30
   1  -9  -3   23.61    1.40
  -1   9   3   24.41    1.18
   0  -9  -3   17.65    1.38
   0   9   3   18.21    1.28
  -1  -9  -3   65.45    2.01
   1   9   3   65.58    1.77
   1   9   3   66.07    2.32
  -2  -9  -3   73.19    3.30
   2   9   3   75.76    3.11
  -4  -9  -3   19.36    1.83
   4   9   3   19.17    2.13
  -5  -9  -3    4.06    2.11
   5   9   3    4.44    2.52
  -6  -9  -3    3.65    2.02
   6   9   3    3.77    2.65
  -7  -9  -3    4.53    2.08
   7   9   3    7.42    3.12
  -8  -9  -3   19.37    2.26
   8   9   3   21.38    3.37
  -9  -9  -3    7.89    2.47
   9   9   3   10.32    3.78
 -10  -9  -3   -0.41    2.58
  10   9   3    0.23    4.28
 -11  -9  -3    6.27    3.51
 -12  -9  -3    0.31    3.19
 -19  10   3    0.37    2.09
 -18  10   3    6.53    2.17
 -17  10   3   12.20    1.97
 -16  10   3   10.23    1.84
 -15  10   3   16.63    1.90
 -14  10   3   20.91    1.77
 -13  10   3   66.97    2.94
 -12  10   3   10.66    1.28
 -11  10   3    4.89    1.22
 -10  10   3   17.19    1.76
  -9  10   3    0.98    0.99
  -8  10   3    3.29    0.97
  -7  10   3    2.03    0.91
  -6  10   3   26.83    1.16
   4 -10  -3   29.93    1.38
   3 -10  -3    2.70    1.41
   2 -10  -3    0.01    1.27
  -2  10   3    1.43    1.17
   1 -10  -3   41.87    1.96
  -1  10   3   43.16    1.90
   0  10   3   88.48    1.65
  -1 -10  -3    0.68    1.61
  -2 -10  -3   12.60    1.83
   2  10   3   13.28    1.97
   2  10   3   10.89    2.39
  -3 -10  -3   82.81    2.66
   3  10   3   84.97    2.62
  -4 -10  -3    0.56    1.93
   4  10   3   -0.21    2.37
  -5 -10  -3   11.27    1.90
   5  10   3   11.11    2.51
  -6 -10  -3   36.38    2.35
   6  10   3   37.58    2.98
  -7 -10  -3    8.38    2.53
   7  10   3    9.24    3.21
  -8 -10  -3   11.83    2.64
   8  10   3   13.81    3.76
  -9 -10  -3    2.99    2.89
   9  10   3    3.43    4.11
 -10 -10  -3    1.05    3.16
  10  10   3    1.49    4.58
 -19  11   3    5.01    2.38
 -18  11   3    1.91    2.11
 -17  11   3    4.86    2.00
 -16  11   3    0.71    1.60
 -15  11   3    0.66    1.54
 -14  11   3    3.86    1.55
 -13  11   3    6.95    1.32
 -12  11   3    3.20    1.12
 -11  11   3    2.81    1.13
 -10  11   3    7.86    1.12
  -9  11   3   28.22    1.15
  -8  11   3   14.04    0.91
  -7  11   3    4.41    0.89
  -6  11   3   13.96    1.11
   5 -11  -3  105.36    3.58
   4 -11  -3   43.23    1.65
   3 -11  -3   97.97    2.70
   2 -11  -3   10.92    1.71
  -2  11   3   10.90    1.51
   1 -11  -3   64.15    1.98
  -1  11   3   65.65    1.77
   0 -11  -3   50.40    1.71
   0  11   3   49.91    1.68
  -1 -11  -3    2.98    1.92
   1  11   3    2.72    1.87
  -2 -11  -3    1.88    1.97
   2  11   3    1.93    2.13
  -3 -11  -3    7.80    1.99
   3  11   3   10.06    2.42
  -4 -11  -3   18.44    2.26
   4  11   3   19.46    2.47
  -5 -11  -3   68.13    2.46
   5  11   3   70.14    3.07
  -6 -11  -3   -0.47    2.49
   6  11   3   -0.33    3.15
  -7 -11  -3    2.71    2.72
   7  11   3    2.73    3.68
  -8 -11  -3   33.79    3.30
   8  11   3   35.71    4.21
  -9 -11  -3    8.31    3.37
   9  11   3    6.40    4.54
 -10 -11  -3   -0.60    3.56
  10  11   3    1.06    5.15
 -19  12   3   25.33    2.96
 -18  12   3   -0.54    2.10
 -17  12   3   10.58    1.92
 -16  12   3    5.13    1.90
 -15  12   3   24.59    2.17
 -14  12   3   10.63    1.85
 -13  12   3    1.66    1.41
 -12  12   3    1.49    1.27
 -11  12   3   16.33    1.38
 -10  12   3   44.63    1.65
  -9  12   3    4.80    1.18
  -8  12   3   46.69    1.80
  -7  12   3   81.59    2.51
  -6  12   3   68.78    2.20
   5 -12  -3   13.38    1.54
   4 -12  -3   11.62    1.47
   3 -12  -3  126.89    3.40
  -3  12   3  127.35    3.15
   2 -12  -3    3.36    1.66
   1 -12  -3    2.91    1.83
  -1  12   3    4.46    1.71
   0 -12  -3  133.91    2.20
   0  12   3  133.28    2.10
  -1 -12  -3  128.60    3.92
   1  12   3  124.72    3.36
  -2 -12  -3   17.04    2.24
   2  12   3   17.79    2.51
  -3 -12  -3   62.31    2.39
  -4 -12  -3   50.32    2.73
   4  12   3   48.53    2.87
  -5 -12  -3    7.35    2.60
   5  12   3    6.19    3.16
  -6 -12  -3    5.06    2.77
   6  12   3    3.85    3.56
  -7 -12  -3   -0.55    3.04
   7  12   3    1.56    4.04
  -8 -12  -3   16.25    3.27
   8  12   3   17.81    4.45
   9  12   3    2.01    5.09
 -18  13   3    6.62    2.12
 -17  13   3    1.58    1.92
 -16  13   3    1.85    1.74
 -15  13   3   34.00    2.26
 -14  13   3   49.38    3.27
 -13  13   3    5.12    1.41
 -12  13   3    0.70    1.22
 -11  13   3    2.70    1.36
 -10  13   3    1.53    1.25
  -9  13   3    2.89    1.11
  -8  13   3   50.61    2.23
  -7  13   3   39.00    1.93
   5 -13  -3   32.62    1.99
   4 -13  -3   43.33    1.94
   3 -13  -3    1.96    1.90
  -3  13   3    1.01    1.61
   2 -13  -3   14.57    1.89
  -2  13   3   14.95    1.78
   1 -13  -3   44.63    2.01
  -1  13   3   45.65    1.98
   0 -13  -3    5.25    2.10
   0  13   3    6.14    2.05
  -1 -13  -3   52.10    2.76
   1  13   3   50.80    2.61
  -2 -13  -3   13.76    2.60
   2  13   3   14.72    2.91
  -3 -13  -3   20.61    2.57
   3  13   3   21.07    2.82
  -4 -13  -3    8.27    2.77
   4  13   3    7.61    3.20
  -5 -13  -3    4.20    2.84
   5  13   3    4.02    3.53
  -6 -13  -3    7.89    3.37
   6  13   3    6.04    3.95
  -7 -13  -3    0.33    3.28
   7  13   3    3.87    4.41
   8  13   3   29.97    4.93
 -18  14   3    1.38    2.11
 -17  14   3   -0.45    1.87
 -16  14   3   17.26    2.26
 -15  14   3    1.06    1.71
 -14  14   3    7.74    1.63
 -13  14   3    2.31    1.44
 -12  14   3    2.17    1.29
 -11  14   3   93.94    3.70
 -10  14   3   22.72    1.74
  -9  14   3   14.20    1.50
  -8  14   3   39.20    2.22
  -7  14   3    8.85    1.17
   5 -14  -3   60.01    3.31
   4 -14  -3    0.66    1.89
   3 -14  -3   19.88    2.07
  -3  14   3   20.35    2.09
   2 -14  -3   26.56    2.38
  -2  14   3   26.74    2.36
   1 -14  -3    9.63    2.25
  -1  14   3    9.63    2.17
   0 -14  -3    6.34    2.16
   0  14   3    6.23    2.56
  -1 -14  -3   13.75    2.48
  -2 -14  -3    3.70    2.61
   2  14   3    2.93    2.90
  -3 -14  -3   -0.42    2.81
   3  14   3    1.07    3.10
  -4 -14  -3    4.91    3.05
   4  14   3    4.50    3.50
  -5 -14  -3    7.74    3.41
   5  14   3    7.97    4.00
  -6 -14  -3    3.50    3.57
   6  14   3    0.76    4.30
  -7 -14  -3    2.59    3.82
 -18  15   3    1.61    1.99
 -17  15   3    4.98    1.96
 -16  15   3    4.75    1.87
 -15  15   3   -0.05    1.71
 -14  15   3    9.99    1.83
 -13  15   3    2.79    1.45
 -12  15   3   16.52    1.66
 -11  15   3   20.42    1.46
 -10  15   3    2.20    1.40
  -9  15   3    1.10    1.18
  -8  15   3    2.29    1.31
  -7  15   3   57.97    2.24
   5 -15  -3   27.05    2.26
   4 -15  -3   45.90    2.18
  -4  15   3   44.38    2.23
   3 -15  -3    4.76    2.45
  -3  15   3    6.87    2.49
   2 -15  -3    9.48    2.34
  -2  15   3    9.83    2.39
   1 -15  -3    8.73    2.44
  -1  15   3    6.65    2.63
   0 -15  -3   38.53    2.66
  -1 -15  -3   30.65    2.94
   1  15   3   32.14    3.09
  -2 -15  -3   19.12    2.86
   2  15   3   20.96    3.26
  -3 -15  -3   -0.57    2.88
   3  15   3    1.92    3.54
  -4 -15  -3    0.14    3.54
   4  15   3    2.39    4.04
  -5 -15  -3    0.79    3.45
   5  15   3    3.21    4.37
  -6 -15  -3   10.71    3.88
   6  15   3    7.02    4.75
 -17  16   3    1.47    2.05
 -16  16   3    4.65    2.18
 -15  16   3    6.35    1.90
 -14  16   3    0.72    1.71
 -13  16   3    1.58    1.53
 -12  16   3    6.24    1.59
 -11  16   3    0.40    1.37
 -10  16   3    1.26    1.32
  -9  16   3   12.82    1.41
  -8  16   3   60.44    1.97
  -7  16   3    7.29    1.36
   5 -16  -3    6.09    2.44
   4 -16  -3   23.72    2.45
  -4  16   3   25.76    2.68
   3 -16  -3    1.02    2.36
  -3  16   3    3.45    2.70
   2 -16  -3    1.02    2.53
  -2  16   3    2.21    2.61
   1 -16  -3    8.46    2.50
  -1  16   3    8.61    2.68
   0 -16  -3   20.46    2.86
   0  16   3   20.57    2.95
  -1 -16  -3   11.79    2.89
   1  16   3   15.48    3.50
  -2 -16  -3   46.35    3.40
   2  16   3   44.49    3.64
  -3 -16  -3    4.85    3.42
  -4 -16  -3   10.07    3.57
   4  16   3    7.68    4.19
  -5 -16  -3    2.85    4.43
   5  16   3    1.83    4.68
 -16  17   3    2.98    2.14
 -15  17   3   -0.12    1.77
 -14  17   3    1.19    1.76
 -13  17   3    2.96    1.71
 -12  17   3   15.25    1.81
 -11  17   3    8.52    1.68
 -10  17   3    0.47    1.49
  -9  17   3   24.60    1.58
  -8  17   3    2.26    1.42
  -7  17   3    9.55    1.68
   5 -17  -3   -0.40    2.56
  -5  17   3   -0.53    2.78
   4 -17  -3   29.91    2.96
  -4  17   3   28.52    2.81
   3 -17  -3   -0.37    2.71
  -3  17   3    2.18    2.77
   2 -17  -3   -0.61    2.78
  -2  17   3    1.77    2.96
   1 -17  -3   10.72    2.88
  -1  17   3   14.18    3.25
   0 -17  -3    5.50    3.37
   0  17   3    3.92    3.39
  -1 -17  -3    1.14    3.30
   1  17   3    2.10    3.87
  -2 -17  -3   39.04    3.39
   2  17   3   38.17    3.86
  -3 -17  -3   11.60    3.56
   3  17   3   10.98    4.07
  -4 -17  -3    2.43    3.99
   4  17   3   -0.96    4.53
 -16  18   3    0.27    1.97
 -15  18   3    1.33    1.97
 -14  18   3    3.18    1.90
 -13  18   3   -0.36    1.79
 -12  18   3    7.92    1.79
 -11  18   3   -0.10    1.65
 -10  18   3    0.66    1.67
  -9  18   3    1.36    1.70
  -8  18   3    8.03    1.62
  -7  18   3   31.08    1.71
  -6  18   3   16.59    3.22
   5 -18  -3    2.45    2.86
  -5  18   3    2.38    3.12
   4 -18  -3    1.69    2.90
   3 -18  -3    6.57    3.27
  -3  18   3    6.59    3.13
   2 -18  -3    6.03    3.27
  -2  18   3    6.30    3.39
  -1  18   3    0.48    3.35
   0 -18  -3   -0.60    3.28
   0  18   3    3.78    3.82
  -1 -18  -3    5.58    3.85
   1  18   3    4.66    4.08
  -2 -18  -3    3.55    3.76
   2  18   3    6.40    4.26
 -15  19   3    5.41    2.18
 -14  19   3   -0.46    1.90
 -13  19   3    0.38    2.03
 -12  19   3    2.59    2.02
 -11  19   3    6.75    1.98
 -10  19   3    3.67    1.93
  -9  19   3   12.52    1.93
  -8  19   3    6.27    1.76
  -7  19   3    3.38    1.87
  -6  19   3    6.43    3.56
   5 -19  -3    1.72    3.34
  -5  19   3    1.39    3.54
   4 -19  -3    6.57    3.15
  -4  19   3    7.77    3.39
   3 -19  -3   -0.80    3.51
  -3  19   3    0.51    3.44
   2 -19  -3   -0.83    3.27
  -2  19   3    0.39    3.49
   1 -19  -3   10.98    3.70
  -1  19   3    7.58    3.75
   0 -19  -3    0.37    3.68
   0  19   3   -1.10    4.20
 -13  20   3    0.21    2.17
 -12  20   3    1.79    2.13
 -11  20   3   39.19    2.64
 -10  20   3   11.45    2.05
  -9  20   3    3.53    1.93
  -8  20   3    1.98    2.03
  -7  20   3    2.99    4.14
  -6  20   3    1.28    3.93
   5 -20  -3    3.67    3.37
  -5  20   3    4.15    3.68
   4 -20  -3   37.02    3.74
  -4  20   3   39.30    3.80
   3 -20  -3    7.01    3.82
  -3  20   3    7.02    3.76
   2 -20  -3    3.28    3.97
  -2  20   3    0.74    3.85
 -11  21   3    4.41    2.26
 -10  21   3    4.18    1.98
  -9  21   3    8.26    2.10
  -8  21   3    4.18    4.30
  -7  21   3    3.90    2.19
  -7  21   3    1.11    4.24
  -6  21   3    1.93    4.09
   5 -21  -3   -0.16    3.88
  -5  21   3   -1.01    3.95
  -4  23  -4    2.44    4.20
  -4  23  -4    5.33    5.26
  -5  23  -4    9.78    4.35
  -5  23  -4   12.04    5.13
  -5  23  -4    9.61    2.24
  -6  23  -4    3.42    4.11
  -6  23  -4    1.32    2.28
  -7  23  -4    1.75    2.16
  -7  23  -4   -0.41    3.90
  -8  23  -4    4.97    4.15
  -9  23  -4    9.20    3.77
  -9  23  -4    7.62    2.15
 -10  23  -4   -0.09    3.55
 -10  23  -4    0.15    2.22
  -1  22  -4    1.40    4.79
  -1  22  -4    4.84    4.07
   1 -22   4    3.34    3.77
  -2  22  -4   -0.30    4.79
  -2  22  -4    1.53    3.99
   2 -22   4   -0.88    3.50
  -3  22  -4    2.94    3.90
  -3  22  -4    1.92    4.61
   3 -22   4    2.82    3.33
  -4  22  -4    4.56    4.30
  -4  22  -4    5.39    3.80
  -5  22  -4    1.74    1.96
  -5  22  -4    3.44    3.60
  -5  22  -4    2.46    4.40
  -6  22  -4    1.97    3.49
  -6  22  -4    2.07    1.96
  -7  22  -4    2.00    1.99
  -7  22  -4    0.98    3.62
  -8  22  -4    5.53    3.51
  -8  22  -4    7.15    1.92
  -9  22  -4    4.12    2.04
  -9  22  -4   -0.93    3.69
 -10  22  -4   17.25    2.41
 -11  22  -4    4.92    3.92
 -11  22  -4    5.15    2.13
 -12  22  -4    3.17    3.75
 -12  22  -4    3.69    2.29
   1  21  -4   -1.19    4.79
  -1 -21   4    3.38    3.85
   0  21  -4   18.36    4.65
   0 -21   4   13.22    3.43
  -1  21  -4    2.01    4.24
  -1  21  -4    3.69    3.56
   1 -21   4    1.30    3.40
  -2  21  -4    2.08    3.57
  -2  21  -4    2.50    4.16
   2 -21   4    2.17    3.22
  -3  21  -4   19.14    4.34
  -3  21  -4   17.60    3.78
   3 -21   4   16.02    3.20
  -4  21  -4   15.19    4.17
  -4  21  -4   16.09    3.53
  -5  21  -4    0.44    3.35
  -6  21  -4    3.01    3.15
  -6  21  -4    2.12    1.83
  -7  21  -4   -0.45    2.91
  -7  21  -4    0.57    1.76
  -8  21  -4    0.79    1.73
  -8  21  -4   -0.05    3.18
  -9  21  -4    0.86    3.09
  -9  21  -4   -0.39    1.72
 -10  21  -4    3.47    1.94
 -11  21  -4    5.70    3.36
 -11  21  -4    4.95    2.07
 -12  21  -4    5.66    2.00
 -12  21  -4    7.39    3.24
 -13  21  -4   -0.80    3.04
 -13  21  -4    1.82    2.15
 -14  21  -4   -0.33    2.19
 -14  21  -4   -0.61    3.27
  -3 -20   4    2.17    3.89
   2  20  -4   -0.86    4.35
  -2 -20   4    2.89    3.70
   1  20  -4    3.04    4.13
  -1 -20   4    0.59    3.26
   0  20  -4   -0.99    3.84
   0  20  -4    0.00    3.07
   0 -20   4   -0.83    3.21
  -1  20  -4    5.26    3.35
  -1  20  -4    8.87    4.04
   1 -20   4    7.14    3.22
  -2  20  -4    5.59    3.02
  -2  20  -4    8.53    3.89
   2 -20   4    7.39    2.93
  -3  20  -4    5.86    3.11
  -3  20  -4    4.55    3.60
   3 -20   4    3.48    2.83
  -4  20  -4    2.52    3.19
  -5  20  -4   26.93    1.87
  -5  20  -4   25.73    3.19
  -6  20  -4    3.18    2.94
  -6  20  -4    2.87    1.57
  -7  20  -4   19.78    1.76
  -7  20  -4   20.30    3.17
  -8  20  -4    0.00    1.48
  -9  20  -4   16.58    1.94
 -10  20  -4    7.66    1.81
 -11  20  -4    5.17    1.90
 -12  20  -4    3.82    1.90
 -13  20  -4    3.64    2.00
 -13  20  -4    0.99    3.48
 -14  20  -4    1.30    3.31
 -14  20  -4   -0.06    1.97
 -15  20  -4    7.76    2.28
 -15  20  -4    5.75    3.69
   4  19  -4    8.62    4.56
  -4 -19   4    8.09    4.04
   3  19  -4    8.03    4.29
  -3 -19   4    4.23    3.67
   2  19  -4    7.82    3.84
  -2 -19   4   11.94    3.55
   1  19  -4    2.02    2.85
   1  19  -4    0.87    3.74
  -1 -19   4    1.02    3.16
   0  19  -4    2.06    3.52
   0  19  -4    1.89    2.86
   0 -19   4    1.27    3.07
  -1  19  -4   15.93    3.48
   1 -19   4   17.06    2.97
  -2  19  -4   25.57    3.55
   2 -19   4   25.95    2.85
   3 -19   4   11.75    2.70
  -4  19  -4   -0.49    2.64
  -5  19  -4   22.11    1.78
  -5  19  -4   21.29    3.04
  -6  19  -4   46.52    1.76
  -6  19  -4   45.26    2.88
  -7  19  -4    7.66    1.41
  -8  19  -4    7.72    1.47
  -9  19  -4    4.59    1.61
 -10  19  -4    6.98    1.56
 -11  19  -4    4.32    1.71
 -12  19  -4    2.84    1.76
 -13  19  -4   20.08    2.36
 -14  19  -4    7.18    3.04
 -14  19  -4    9.28    1.91
 -15  19  -4   -0.82    3.35
 -15  19  -4   -0.46    1.99
 -16  19  -4    0.01    3.36
 -16  19  -4    0.07    2.02
   6  18  -4    4.06    4.72
  -6 -18   4    6.26    4.21
   5  18  -4    0.10    4.43
  -5 -18   4    1.42    3.88
   4  18  -4    0.36    3.80
   3  18  -4    5.53    3.92
  -3 -18   4    2.77    3.37
   2  18  -4   47.27    3.71
  -2 -18   4   49.19    3.40
   1  18  -4    0.62    2.45
   1  18  -4    1.33    3.18
  -1 -18   4    0.00    2.97
   0  18  -4    3.36    3.04
   0  18  -4    6.04    2.75
   0 -18   4    5.07    2.74
  -1  18  -4   18.24    2.58
  -1  18  -4   15.41    3.02
   1 -18   4   17.36    2.63
  -2  18  -4    0.65    2.50
  -2  18  -4    2.04    2.86
   2 -18   4    1.92    2.48
  -3  18  -4   12.24    2.52
   3 -18   4   12.46    2.27
  -4  18  -4    0.99    2.36
  -5  18  -4    2.73    1.34
  -5  18  -4    2.63    2.35
  -6  18  -4   38.95    1.70
  -7  18  -4    1.86    1.33
  -8  18  -4    0.22    1.38
  -9  18  -4   53.79    2.10
 -10  18  -4   19.59    1.54
 -11  18  -4    2.29    1.54
 -12  18  -4    4.82    1.73
 -13  18  -4    9.21    1.70
 -14  18  -4    1.65    1.69
 -14  18  -4    0.25    3.10
 -15  18  -4    4.01    2.00
 -15  18  -4    5.73    3.89
 -16  18  -4    0.46    1.98
 -16  18  -4    1.51    3.46
   7  17  -4    0.99    4.34
   6  17  -4    5.97    4.31
  -6 -17   4    7.61    3.77
   5  17  -4    3.95    4.09
  -5 -17   4    3.25    3.54
   4  17  -4    2.07    3.47
  -4 -17   4    1.98    3.40
   3  17  -4    3.50    3.42
  -3 -17   4    6.13    3.14
   2  17  -4   13.79    3.12
  -2 -17   4   10.49    2.78
   1  17  -4    6.26    3.10
   1  17  -4    3.52    2.34
  -1 -17   4    2.11    2.50
   0  17  -4   40.25    2.67
   0  17  -4   40.54    3.20
   0 -17   4   40.14    2.78
  -1  17  -4   32.72    2.90
  -1  17  -4   34.23    2.53
   1 -17   4   31.32    2.32
  -2  17  -4    2.61    2.28
  -2  17  -4    4.52    2.95
   2 -17   4    4.01    2.21
  -3  17  -4    8.96    2.27
   3 -17   4    8.38    1.92
  -4  17  -4   -0.51    2.12
  -5  17  -4    2.16    1.16
  -6  17  -4    1.55    1.12
  -7  17  -4    0.05    1.12
  -8  17  -4    7.49    1.29
  -9  17  -4   83.23    2.67
 -10  17  -4    1.42    1.39
 -11  17  -4   13.32    1.68
 -12  17  -4   33.92    1.86
 -13  17  -4   11.03    1.66
 -14  17  -4    2.66    1.71
 -15  17  -4   10.20    2.10
 -15  17  -4   10.64    3.78
 -16  17  -4    3.70    2.05
 -16  17  -4    2.91    3.27
 -17  17  -4    0.17    3.55
 -17  17  -4    0.36    2.14
   8  16  -4   -0.78    4.22
  -8 -16   4    1.78    3.79
   7  16  -4   -0.47    3.86
  -7 -16   4    0.73    3.66
   6  16  -4    1.61    3.82
  -6 -16   4    1.76    3.24
   5  16  -4    4.12    3.49
  -5 -16   4    7.49    3.37
   4  16  -4    3.49    3.22
  -4 -16   4    0.93    3.19
   3  16  -4   18.88    2.93
  -3 -16   4   20.47    2.88
   2  16  -4   15.62    2.79
  -2 -16   4   16.21    2.72
   1  16  -4    1.05    2.01
   1  16  -4   -0.03    2.40
  -1 -16   4    1.55    2.49
   0  16  -4   36.85    2.47
   0  16  -4   34.23    2.83
   0 -16   4   33.32    2.38
  -1  16  -4   24.99    2.43
  -1  16  -4   26.25    2.05
   1 -16   4   25.55    2.10
  -2  16  -4    2.10    2.10
   2 -16   4   -0.48    1.83
   3 -16   4    4.40    1.84
  -5  16  -4    0.91    1.10
  -6  16  -4    0.53    1.08
  -7  16  -4    5.46    1.09
  -8  16  -4   13.16    1.32
  -9  16  -4    1.98    1.26
 -10  16  -4   11.89    1.48
 -11  16  -4   47.78    2.71
 -12  16  -4   16.98    1.59
 -13  16  -4   26.32    1.98
 -14  16  -4    5.39    1.63
 -15  16  -4    1.00    1.70
 -15  16  -4    1.91    2.99
 -16  16  -4    2.42    3.11
 -16  16  -4    4.35    1.79
 -17  16  -4   12.35    2.24
   9  15  -4   -0.37    4.37
  -9 -15   4   -0.36    3.60
   8  15  -4    6.03    3.78
  -8 -15   4    8.59    3.28
   7  15  -4    4.61    3.59
  -7 -15   4    4.69    3.29
   6  15  -4    4.01    3.51
  -6 -15   4    2.56    2.84
   5  15  -4   28.92    3.17
  -5 -15   4   25.51    2.95
   4  15  -4   14.68    3.01
  -4 -15   4   12.63    2.70
   3  15  -4    2.63    2.78
  -3 -15   4    0.50    2.49
   2  15  -4    6.18    2.30
   2  15  -4    6.65    1.80
  -2 -15   4    6.17    2.37
   1  15  -4   28.96    2.45
   1  15  -4   27.20    1.77
  -1 -15   4   27.36    1.96
   0  15  -4   18.93    1.80
   0  15  -4   17.66    2.20
   0 -15   4   20.77    2.19
  -1  15  -4    0.53    2.16
  -1  15  -4    0.49    1.68
   1 -15   4   -0.36    1.83
  -2  15  -4    7.34    1.61
   2 -15   4    7.81    1.64
  -3  15  -4    2.06    1.84
   3 -15   4    2.98    1.55
  -5  15  -4   20.27    1.22
  -6  15  -4    1.42    1.02
  -7  15  -4    4.26    1.00
  -8  15  -4    7.56    1.27
  -9  15  -4   12.95    1.48
 -10  15  -4    5.02    1.28
 -11  15  -4    7.78    1.59
 -12  15  -4   34.13    2.39
 -13  15  -4    0.96    1.44
 -14  15  -4    6.23    1.77
 -14  15  -4    6.54    2.70
 -15  15  -4    0.66    1.68
 -15  15  -4    1.54    3.01
 -16  15  -4   -0.27    2.80
 -16  15  -4    1.54    1.85
 -17  15  -4    7.84    3.44
 -17  15  -4    8.69    2.23
 -18  15  -4    3.51    3.58
 -18  15  -4    2.89    2.21
  10  14  -4    7.81    4.53
 -10 -14   4    8.53    3.66
   9  14  -4    1.93    3.94
  -9 -14   4   -0.15    3.18
   8  14  -4   11.24    3.67
  -8 -14   4   10.77    3.13
   7  14  -4    2.55    3.27
  -7 -14   4    5.04    3.09
   6  14  -4    2.87    3.05
  -6 -14   4    4.32    2.67
   5  14  -4   28.21    2.91
  -5 -14   4   27.60    2.59
   4  14  -4    7.59    2.77
  -4 -14   4    6.71    2.61
   3  14  -4   18.74    2.49
  -3 -14   4   16.37    2.48
   2  14  -4   45.14    2.28
   2  14  -4   44.70    1.61
  -2 -14   4   43.89    2.11
   1  14  -4  107.32    3.70
   1  14  -4  109.00    3.22
  -1 -14   4  107.07    3.78
   0  14  -4   46.27    2.19
   0 -14   4   45.32    2.19
  -1  14  -4   30.79    2.65
  -1  14  -4   33.40    2.68
   1 -14   4   33.93    2.74
  -2  14  -4   77.12    2.19
   2 -14   4   76.64    2.04
   3 -14   4    5.45    1.42
  -5  14  -4   14.64    0.99
  -6  14  -4    5.74    1.21
  -7  14  -4   56.13    2.06
  -8  14  -4   28.80    1.84
  -9  14  -4   60.46    3.37
 -10  14  -4  104.94    3.34
 -11  14  -4    1.23    1.17
 -12  14  -4    3.24    1.35
 -13  14  -4   -0.20    1.35
 -14  14  -4   23.02    3.54
 -14  14  -4   25.21    2.28
 -15  14  -4    6.32    2.79
 -15  14  -4    7.17    1.65
 -16  14  -4    3.16    3.04
 -17  14  -4    2.35    3.01
 -17  14  -4    3.20    1.92
 -18  14  -4    2.90    3.40
 -18  14  -4   -0.10    1.96
  11  13  -4   25.77    4.62
 -11 -13   4   27.40    3.51
  10  13  -4   11.01    4.25
   9  13  -4    0.13    3.54
   8  13  -4   16.58    3.19
  -8 -13   4   16.01    2.69
   7  13  -4   11.35    3.15
  -7 -13   4    9.63    2.78
   6  13  -4   34.20    2.82
  -6 -13   4   34.18    2.58
   5  13  -4   41.76    2.63
  -5 -13   4   40.57    2.32
   4  13  -4    0.06    2.33
   3  13  -4   89.53    2.25
  -3 -13   4   91.87    2.45
   2  13  -4   46.65    2.11
   2  13  -4   46.73    1.59
  -2 -13   4   45.37    2.15
   1  13  -4    5.37    1.43
   1  13  -4    5.18    1.91
  -1 -13   4    3.68    1.71
   0  13  -4   17.06    1.71
   0  13  -4   17.80    1.44
   0 -13   4   18.03    1.69
  -1  13  -4   15.24    1.44
   1 -13   4   16.49    1.46
  -2  13  -4  233.83    4.91
   2 -13   4  233.78    4.71
   3 -13   4   50.78    2.10
  -4  13  -4   68.13    1.74
  -5  13  -4   20.74    1.84
  -6  13  -4    3.70    0.96
  -7  13  -4    0.34    0.86
  -8  13  -4   30.42    1.76
  -9  13  -4    5.31    1.06
 -10  13  -4   79.08    2.56
 -11  13  -4    1.15    1.06
 -12  13  -4    1.48    1.24
 -13  13  -4    0.80    1.34
 -14  13  -4    0.63    1.44
 -14  13  -4    2.03    2.50
 -15  13  -4    0.58    1.52
 -15  13  -4   -0.58    2.45
 -16  13  -4    1.73    2.54
 -16  13  -4    2.05    1.68
 -17  13  -4    1.88    3.24
 -17  13  -4   -0.47    1.81
 -18  13  -4    3.35    2.02
 -18  13  -4    4.82    3.23
  11  12  -4   32.56    4.21
 -11 -12   4   33.78    3.16
  10  12  -4    3.04    3.86
 -10 -12   4    2.50    2.70
   9  12  -4    0.04    3.18
  -9 -12   4    0.34    2.38
   8  12  -4    4.32    3.08
  -8 -12   4   -0.53    2.19
   7  12  -4   59.91    2.64
  -7 -12   4   60.19    2.39
   6  12  -4   12.62    2.81
  -6 -12   4   11.43    2.08
   5  12  -4    1.76    2.29
  -5 -12   4    1.08    2.06
   4  12  -4   26.51    2.06
  -4 -12   4   26.57    1.82
   3  12  -4    5.43    1.89
  -3 -12   4    5.68    1.80
   2  12  -4    3.89    1.83
   2  12  -4    2.04    1.30
  -2 -12   4    1.82    1.78
   1  12  -4    9.69    1.78
   1  12  -4    9.81    1.27
  -1 -12   4   10.49    1.65
   0  12  -4   39.63    1.73
   0  12  -4   39.47    1.42
   0 -12   4   38.29    1.46
  -1  12  -4  323.74    5.35
   1 -12   4  328.27    5.32
  -2  12  -4   27.00    1.51
   2 -12   4   26.12    1.35
   3 -12   4   77.73    2.74
  -4  12  -4    9.38    0.69
  -5  12  -4   17.81    0.71
  -6  12  -4  226.54    7.39
  -7  12  -4    0.96    0.82
  -8  12  -4    6.20    0.93
  -9  12  -4   59.01    1.88
 -10  12  -4    0.97    1.11
 -11  12  -4   11.88    1.31
 -12  12  -4    0.72    1.10
 -13  12  -4   40.88    3.44
 -13  12  -4   40.07    2.39
 -14  12  -4    2.55    1.41
 -14  12  -4    2.67    2.46
 -15  12  -4   -0.35    1.50
 -15  12  -4   -0.11    2.56
 -16  12  -4   28.64    2.63
 -16  12  -4   27.47    3.41
 -17  12  -4    5.97    1.85
 -17  12  -4    4.64    2.89
 -18  12  -4    2.52    2.03
 -18  12  -4    1.94    3.01
  12  11  -4    2.30    4.33
 -12 -11   4    1.11    2.97
  11  11  -4    8.10    4.02
 -11 -11   4    4.31    2.68
  10  11  -4    4.20    3.55
 -10 -11   4    4.70    2.65
   9  11  -4   12.38    2.96
  -9 -11   4   14.84    2.28
   8  11  -4   63.87    2.84
  -8 -11   4   64.79    2.07
   7  11  -4   31.08    2.44
  -7 -11   4   32.17    1.99
   6  11  -4   13.05    2.64
  -6 -11   4   13.97    1.91
   5  11  -4    3.14    2.24
  -5 -11   4    2.47    1.79
   4  11  -4    0.88    1.95
  -4 -11   4    0.73    1.65
   3  11  -4   33.18    3.17
  -3 -11   4   27.17    2.94
   2  11  -4   57.85    1.92
   2  11  -4   55.43    2.19
  -2 -11   4   57.30    2.10
   1  11  -4   31.55    1.84
  -1 -11   4   31.22    1.90
   0  11  -4  111.93    2.39
   0 -11   4  109.51    2.54
  -1  11  -4  225.89    4.17
   1 -11   4  230.41    4.14
  -2  11  -4  195.58    5.76
   2 -11   4  204.21    5.61
  -4  11  -4  123.39    3.59
  -5  11  -4    9.99    0.63
  -6  11  -4  186.91    6.36
  -7  11  -4    4.27    0.80
  -8  11  -4   49.76    1.98
  -9  11  -4  131.96    4.54
 -10  11  -4  416.17   14.11
 -11  11  -4   46.00    2.39
 -12  11  -4   51.60    3.03
 -12  11  -4   51.61    2.23
 -13  11  -4    2.71    1.38
 -13  11  -4    2.27    2.20
 -14  11  -4    3.39    1.48
 -14  11  -4    3.54    2.55
 -15  11  -4    1.03    2.22
 -15  11  -4    0.52    1.46
 -16  11  -4   10.75    2.80
 -16  11  -4   12.51    1.92
 -17  11  -4   10.25    3.06
 -17  11  -4    8.39    1.91
 -18  11  -4   15.79    2.73
 -18  11  -4   15.65    3.54
  13  10  -4   10.43    4.11
 -13 -10   4    8.68    2.76
  12  10  -4    0.88    4.03
 -12 -10   4    2.64    2.92
  11  10  -4   15.81    3.69
 -11 -10   4   15.15    2.58
  10  10  -4   27.59    3.24
 -10 -10   4   28.15    2.29
   9  10  -4    8.13    2.82
  -9 -10   4    6.99    1.95
   8  10  -4   13.54    2.49
  -8 -10   4   12.21    1.69
   7  10  -4  101.73    2.58
  -7 -10   4   99.45    1.82
   6  10  -4   42.95    2.40
  -6 -10   4   42.99    1.63
  -5 -10   4   41.86    1.61
   4  10  -4  116.00    2.29
  -4 -10   4  118.11    1.90
   3  10  -4  218.21    5.61
  -3 -10   4  223.57    5.46
   2  10  -4   24.13    1.45
   2  10  -4   27.19    2.06
  -2 -10   4   26.03    1.82
   1  10  -4   32.21    2.19
   1  10  -4   29.85    1.70
  -1 -10   4   31.19    1.84
   0  10  -4    2.04    1.08
   0 -10   4    1.99    1.20
  -1  10  -4   10.68    0.89
  -1  10  -4   10.72    1.02
   1 -10   4   11.17    1.00
  -2  10  -4  127.49    4.24
  -2  10  -4  129.19    4.38
   2 -10   4  128.83    4.18
  -3  10  -4    6.60    1.10
  -4  10  -4    3.53    0.61
  -5  10  -4    3.18    0.68
  -6  10  -4    1.48    0.67
  -7  10  -4   39.89    0.99
  -8  10  -4    8.73    0.95
  -9  10  -4   69.30    2.31
 -10  10  -4   40.18    2.52
 -11  10  -4   37.80    2.28
 -12  10  -4   20.02    1.24
 -13  10  -4    1.03    1.86
 -13  10  -4    1.50    1.22
 -14  10  -4   27.83    2.68
 -14  10  -4   26.86    3.54
 -15  10  -4    0.29    2.23
 -15  10  -4    1.85    1.51
 -16  10  -4    4.70    2.54
 -16  10  -4    3.30    1.63
 -17  10  -4    0.87    2.08
 -17  10  -4    2.29    2.69
 -18  10  -4    1.69    2.42
  14   9  -4   -0.21    4.04
 -14  -9   4    0.10    2.87
  13   9  -4    1.89    3.82
 -13  -9   4    5.87    2.68
  12   9  -4   -0.66    3.75
 -12  -9   4    1.49    2.27
  11   9  -4    2.46    3.41
 -11  -9   4    1.25    2.14
  10   9  -4   34.58    3.29
 -10  -9   4   35.73    2.16
   9   9  -4    4.83    2.64
  -9  -9   4    5.30    1.61
   8   9  -4   45.40    2.31
  -8  -9   4   44.77    1.48
   7   9  -4   66.58    3.66
  -7  -9   4   62.66    2.75
   6   9  -4   15.79    2.64
  -6  -9   4   14.28    1.84
   5   9  -4   30.28    1.80
  -5  -9   4   28.46    1.16
   4   9  -4   25.45    1.61
  -4  -9   4   24.96    1.12
   3   9  -4    5.42    1.38
   2   9  -4   11.69    1.02
   2   9  -4   13.25    1.44
  -2  -9   4   11.29    1.22
   1   9  -4  170.46    3.57
  -1  -9   4  172.72    3.51
   0   9  -4    1.80    0.89
   0  -9   4    2.42    1.04
  -1   9  -4    4.02    0.94
   1  -9   4    5.19    1.03
  -2   9  -4   52.00    2.23
  -2   9  -4   50.52    2.07
   2  -9   4   50.01    1.95
  -3   9  -4    8.92    0.54
  -4   9  -4   68.74    2.21
  -4   9  -4   68.97    2.36
  -5   9  -4   17.64    1.01
  -5   9  -4   18.85    0.89
  -6   9  -4  175.47    4.54
  -7   9  -4  108.59    4.26
  -8   9  -4   53.83    1.68
  -9   9  -4   44.01    2.34
 -10   9  -4   92.92    3.75
 -11   9  -4   77.55    2.29
 -11   9  -4   76.63    2.97
 -12   9  -4   69.67    3.82
 -12   9  -4   69.13    3.12
 -13   9  -4    0.81    1.80
 -13   9  -4    1.45    1.22
 -14   9  -4   57.33    3.48
 -14   9  -4   58.39    2.83
 -15   9  -4    2.70    1.48
 -15   9  -4    4.90    2.44
 -16   9  -4    7.87    2.04
 -16   9  -4    5.34    2.70
 -17   9  -4    7.02    2.20
 -17   9  -4    4.76    2.71
 -18   9  -4   19.15    3.19
 -18   9  -4   17.78    2.57
  14   8  -4   -0.53    3.98
 -14  -8   4   -0.07    2.64
  13   8  -4    9.00    3.86
 -13  -8   4   10.40    2.38
  12   8  -4   15.57    3.62
 -12  -8   4   16.75    2.08
  11   8  -4    2.17    3.14
 -11  -8   4    2.06    1.80
  10   8  -4   42.61    2.89
   9   8  -4    6.81    2.76
  -9  -8   4    6.47    1.73
   8   8  -4   60.47    2.88
  -8  -8   4   62.95    2.37
   7   8  -4   38.86    2.05
  -7  -8   4   38.91    1.32
   6   8  -4  170.19    4.28
  -6  -8   4  173.34    3.66
   5   8  -4    5.22    1.77
  -5  -8   4    3.53    1.10
   4   8  -4   50.43    1.50
  -4  -8   4   50.55    1.02
   3   8  -4   59.59    2.31
  -3  -8   4   55.83    1.81
   2   8  -4   11.73    1.08
   2   8  -4   11.88    0.53
   2   8  -4   11.93    0.80
  -2  -8   4   12.34    0.93
   1   8  -4    1.09    0.55
   1   8  -4    1.06    1.12
   1   8  -4    0.80    0.79
  -1  -8   4    1.22    1.00
   0   8  -4    2.00    0.64
   0   8  -4    1.19    0.81
   0  -8   4    1.22    0.90
  -1   8  -4   29.73    0.92
  -1   8  -4   29.41    0.75
   1  -8   4   29.36    0.78
   2  -8   4  146.10    2.88
  -3   8  -4    6.67    0.93
  -3   8  -4    7.90    1.54
  -5   8  -4  110.56    2.95
   5  -8   4  113.21    2.92
  -6   8  -4   15.44    1.02
  -7   8  -4  185.18    7.10
  -8   8  -4    1.45    0.68
  -9   8  -4   14.44    1.90
  -9   8  -4   13.47    1.46
 -10   8  -4  330.04    9.33
 -10   8  -4  331.68    9.70
 -11   8  -4   41.66    2.11
 -11   8  -4   37.43    2.72
 -12   8  -4   11.22    1.93
 -12   8  -4   11.61    1.41
 -13   8  -4   24.76    1.54
 -13   8  -4   25.18    2.19
 -14   8  -4   41.01    2.83
 -14   8  -4   40.18    1.97
 -15   8  -4    0.83    2.19
 -15   8  -4    1.13    1.59
 -16   8  -4    6.70    2.00
 -17   8  -4    3.46    2.24
 -17   8  -4    4.80    2.78
 -18   8  -4   12.96    3.09
 -18   8  -4   14.64    2.57
 -15  -7   4    1.91    2.76
 -14  -7   4    4.47    2.38
  13   7  -4   57.00    3.78
 -13  -7   4   58.09    2.29
  12   7  -4    1.20    3.33
 -12  -7   4   -0.17    1.77
  11   7  -4   33.64    2.88
 -11  -7   4   34.20    1.70
  10   7  -4    4.35    2.48
 -10  -7   4    4.64    1.39
   9   7  -4    0.91    2.29
  -9  -7   4    0.05    1.31
   8   7  -4   72.08    2.12
  -8  -7   4   72.39    1.31
   7   7  -4    1.53    1.91
  -7  -7   4    0.48    1.08
   6   7  -4    3.01    1.84
  -6  -7   4    4.00    1.12
   5   7  -4  344.06    6.61
  -5  -7   4  342.00    6.20
   4   7  -4  183.04    3.81
  -4  -7   4  179.45    3.29
  -3  -7   4  147.20    2.84
   2   7  -4  159.00    3.44
   2   7  -4  159.20    3.14
   2   7  -4  158.07    2.96
  -2  -7   4  159.77    3.13
   1   7  -4  198.85    6.49
   1   7  -4  195.50    6.36
   1   7  -4  201.82    6.68
  -1  -7   4  200.66    6.51
   0   7  -4   64.69    1.55
   0   7  -4   64.92    1.77
   0  -7   4   64.28    1.75
  -1   7  -4  116.01    2.01
  -1   7  -4  116.72    1.87
   1  -7   4  116.56    1.83
  -2   7  -4  344.19    6.99
  -2   7  -4  350.72    6.93
  -2   7  -4  348.26    7.16
  -3   7  -4    8.71    0.62
  -3   7  -4    9.41    1.04
  -3   7  -4    8.29    0.67
  -4   7  -4   26.35    1.77
  -4   7  -4   26.25    1.33
   4  -7   4   27.12    1.29
  -5   7  -4   11.46    1.29
  -5   7  -4   11.36    0.83
   5  -7   4   11.55    0.71
  -6   7  -4  138.80    4.08
  -6   7  -4  139.50    3.74
  -7   7  -4  399.58   11.67
  -7   7  -4  418.05   11.44
  -8   7  -4    0.83    1.12
  -8   7  -4    1.12    0.70
  -9   7  -4   17.02    2.36
  -9   7  -4   14.66    1.80
 -10   7  -4  166.38    6.16
 -10   7  -4  162.33    6.47
 -11   7  -4    7.37    1.23
 -11   7  -4    7.98    1.89
 -12   7  -4   12.11    1.62
 -12   7  -4   11.26    1.08
 -13   7  -4   64.86    2.99
 -13   7  -4   65.57    3.51
 -14   7  -4   31.61    2.38
 -14   7  -4   30.58    1.88
 -15   7  -4    3.42    2.19
 -15   7  -4    1.80    1.62
 -16   7  -4    7.02    2.39
 -16   7  -4    5.75    1.92
 -17   7  -4    1.72    2.13
 -17   7  -4    1.25    2.64
 -18   7  -4    7.03    2.45
 -18   7  -4    5.45    2.92
 -15  -6   4    1.84    2.39
  14   6  -4   22.39    3.71
 -14  -6   4   23.87    2.33
  13   6  -4    7.70    3.24
 -13  -6   4    7.57    1.81
  12   6  -4    3.57    3.17
 -12  -6   4    5.28    1.86
  11   6  -4    1.26    2.72
 -11  -6   4    1.61    1.40
  10   6  -4   79.53    4.14
 -10  -6   4   81.56    2.88
   9   6  -4    1.29    2.13
  -9  -6   4    2.35    1.26
   8   6  -4    5.16    1.86
  -8  -6   4    4.74    1.11
   7   6  -4  200.71    3.26
  -7  -6   4  204.26    2.52
  -6  -6   4   36.14    1.13
   5   6  -4  170.87    4.73
  -5  -6   4  169.16    4.28
   4   6  -4  638.36   17.09
  -4  -6   4  645.13   16.84
   3   6  -4  114.72    4.34
   3   6  -4  119.40    4.00
  -3  -6   4  119.44    4.06
   2   6  -4  370.52   10.50
   2   6  -4  373.34   10.62
   2   6  -4  366.27   10.76
  -2  -6   4  371.30   10.55
   1   6  -4   23.31    0.50
   1   6  -4   22.62    0.76
  -1  -6   4   22.36    0.69
   0   6  -4   66.50    1.75
   0   6  -4   65.25    1.97
   0  -6   4   63.81    1.86
  -1   6  -4   66.74    2.38
  -1   6  -4   66.98    2.22
  -2   6  -4  562.74   14.06
  -2   6  -4  571.11   14.26
  -2   6  -4  577.52   14.09
  -3   6  -4   46.33    1.34
  -3   6  -4   45.99    0.95
   3  -6   4   46.72    0.93
  -4   6  -4  161.50    5.14
  -4   6  -4  159.01    4.88
   4  -6   4  155.86    4.86
  -5   6  -4  923.01   24.85
  -5   6  -4  908.75   25.04
   5  -6   4  923.47   24.84
  -6   6  -4  155.16    4.62
  -6   6  -4  157.37    4.90
  -7   6  -4    2.13    0.69
  -7   6  -4    2.28    1.12
  -8   6  -4    1.74    1.07
  -9   6  -4   42.06    2.12
  -9   6  -4   41.60    1.67
 -10   6  -4    2.46    1.35
 -10   6  -4    2.51    0.98
 -11   6  -4   47.27    2.44
 -11   6  -4   46.16    1.81
 -12   6  -4    6.11    1.64
 -12   6  -4    5.71    1.19
 -13   6  -4   88.95    3.38
 -13   6  -4   84.85    3.77
 -14   6  -4    3.33    1.91
 -14   6  -4    1.86    1.43
 -15   6  -4    3.42    2.21
 -15   6  -4    2.67    1.69
 -16   6  -4    2.71    2.31
 -16   6  -4    2.90    1.89
 -17   6  -4    8.30    2.25
 -17   6  -4    9.10    2.71
 -18   6  -4   -0.70    3.01
 -18   6  -4   -0.57    2.50
 -16  -5   4   12.03    2.59
 -15  -5   4   -0.59    2.25
  14   5  -4   -0.21    3.35
 -14  -5   4    0.57    2.01
  13   5  -4    1.19    3.05
 -13  -5   4    1.39    1.71
  12   5  -4   17.89    3.06
 -12  -5   4   21.11    1.87
  11   5  -4   -0.68    2.60
 -11  -5   4   -0.04    1.25
  10   5  -4  156.39    4.88
 -10  -5   4  162.33    3.89
  -9  -5   4   60.38    2.10
   8   5  -4    4.42    2.07
  -8  -5   4    6.16    1.34
   7   5  -4    3.13    1.56
  -7  -5   4    2.55    0.83
   6   5  -4  108.70    3.06
  -6  -5   4  105.92    2.35
   5   5  -4    6.24    1.29
  -5  -5   4    7.01    0.73
   4   5  -4    3.99    1.32
   4   5  -4    4.37    0.68
  -4  -5   4    4.57    0.74
   3   5  -4    7.84    0.90
  -3  -5   4    8.15    1.00
   2   5  -4   56.47    1.93
   2   5  -4   59.10    1.65
  -2  -5   4   58.48    1.80
  -2  -5   4   59.40    1.72
   1   5  -4  389.06   10.04
   1   5  -4  394.75   10.18
  -1  -5   4  396.83   10.08
  -1  -5   4  404.12   10.17
   0   5  -4  268.68    9.46
   0   5  -4  279.34    9.62
  -1   5  -4   37.59    1.56
  -1   5  -4   38.65    1.32
   1  -5   4   37.55    1.51
  -2   5  -4    4.90    0.25
   2  -5   4    4.77    0.23
  -3   5  -4  734.06   17.67
  -3   5  -4  752.88   17.87
   3  -5   4  737.59   17.67
  -4   5  -4  544.56   14.53
  -4   5  -4  539.79   14.34
   4  -5   4  536.26   14.33
  -5   5  -4   35.23    1.19
  -5   5  -4   34.72    1.51
   5  -5   4   35.54    1.16
  -6   5  -4    5.46    0.53
  -6   5  -4    6.34    0.84
   6  -5   4    5.16    0.32
  -7   5  -4   90.20    3.46
  -7   5  -4   92.55    3.74
  -8   5  -4    0.46    0.90
  -8   5  -4    0.85    0.68
  -9   5  -4   25.97    1.40
  -9   5  -4   25.50    1.58
 -10   5  -4  100.81    3.22
 -10   5  -4  106.33    2.96
 -11   5  -4   61.62    2.68
 -11   5  -4   60.06    2.29
 -12   5  -4    0.03    1.57
 -12   5  -4    1.52    1.22
 -13   5  -4    0.58    1.70
 -13   5  -4    1.46    1.39
 -14   5  -4    1.77    1.47
 -14   5  -4    0.84    1.84
 -15   5  -4    3.78    1.79
 -15   5  -4    4.79    2.13
 -16   5  -4    8.18    2.46
 -16   5  -4    8.76    2.04
 -17   5  -4    6.96    2.42
 -17   5  -4    8.62    2.90
 -18   5  -4   -0.27    2.51
 -18   5  -4    4.53    3.32
 -16  -4   4   12.43    2.40
 -15  -4   4    3.72    2.00
 -14  -4   4   10.62    2.17
  13   4  -4    1.01    2.98
 -13  -4   4    2.51    1.71
  12   4  -4    3.88    2.88
 -12  -4   4    2.64    1.49
  11   4  -4    7.89    2.68
 -11  -4   4    7.33    1.37
  10   4  -4    9.09    2.23
 -10  -4   4    8.95    1.20
   9   4  -4    3.08    1.96
  -9  -4   4    3.53    1.09
   8   4  -4  172.72    4.65
  -8  -4   4  179.76    4.04
   7   4  -4   30.16    1.71
  -7  -4   4   31.28    1.08
   6   4  -4  137.09    4.43
  -6  -4   4  135.48    3.97
  -5  -4   4   26.67    1.41
   4   4  -4  560.40   10.81
  -4  -4   4  561.70   10.81
   3   4  -4  573.79   17.33
  -3  -4   4  574.38   17.33
  -3  -4   4  583.09   17.52
  -3  -4   4  592.39   17.40
   2   4  -4  481.93   11.30
   2   4  -4  478.46   11.49
  -2  -4   4  482.96   11.30
  -2  -4   4  484.61   11.39
   1   4  -4  893.14   24.90
   1   4  -4  923.65   25.07
  -1  -4   4  912.41   25.02
  -1  -4   4  900.11   24.91
   0   4  -4   87.90    3.97
   0  -4   4   88.97    3.95
  -1   4  -4   48.51    3.36
   1  -4   4   48.82    3.35
  -2   4  -4  730.43   23.30
  -2   4  -4  743.41   23.47
   2  -4   4  747.76   23.46
   2  -4   4  726.24   23.30
  -3   4  -4  388.41   12.83
  -3   4  -4  384.84   13.00
   3  -4   4  376.19   12.97
   3  -4   4  386.98   12.83
  -4   4  -4  365.72   13.26
  -4   4  -4  363.25   13.10
   4  -4   4  364.05   13.10
  -5   4  -4   18.34    1.27
  -5   4  -4   18.32    0.93
   5  -4   4   19.31    0.92
  -6   4  -4   94.25    4.29
  -6   4  -4   96.27    4.50
  -7   4  -4   67.79    1.41
  -7   4  -4   66.31    1.70
  -8   4  -4  185.50    4.87
  -8   4  -4  188.44    4.67
  -9   4  -4   19.41    1.52
  -9   4  -4   19.28    1.90
 -10   4  -4   22.75    1.01
 -10   4  -4   23.23    1.30
 -11   4  -4   42.22    2.57
 -11   4  -4   42.64    2.14
 -12   4  -4    0.00    1.14
 -12   4  -4   -0.26    1.49
 -13   4  -4   25.43    2.64
 -13   4  -4   26.69    2.63
 -14   4  -4   31.29    2.13
 -14   4  -4   35.13    2.67
 -15   4  -4    1.29    2.30
 -15   4  -4    0.26    1.89
 -16   4  -4    8.15    2.18
 -16   4  -4    9.91    2.72
 -17   4  -4   -0.33    2.31
 -17   4  -4    2.10    2.99
 -17  -3   4    3.17    2.43
 -16  -3   4    0.04    2.42
 -15  -3   4   32.21    2.91
 -14  -3   4    1.31    1.76
  13   3  -4  123.82    4.15
 -13  -3   4  129.31    3.35
  12   3  -4   -0.47    2.42
 -12  -3   4    0.17    1.30
  11   3  -4    3.41    2.38
 -11  -3   4    2.74    1.32
  10   3  -4  102.88    4.24
 -10  -3   4   99.92    3.00
   9   3  -4    0.99    1.90
  -9  -3   4    1.39    0.96
   8   3  -4   47.96    3.47
  -8  -3   4   53.17    2.82
   7   3  -4   32.10    2.58
  -7  -3   4   31.67    1.81
   5   3  -4  285.96    6.51
   5   3  -4  287.00    6.35
  -5  -3   4  288.20    6.19
   4   3  -4  104.85    2.78
   4   3  -4  104.22    3.11
  -4  -3   4  102.76    2.78
  -4  -3   4  103.71    2.99
   3   3  -4   14.48    1.69
   3   3  -4   11.95    1.08
  -3  -3   4   12.17    1.08
  -3  -3   4   14.55    1.43
   2   3  -4  254.26    2.17
   2   3  -4  256.65    1.92
  -2  -3   4  256.42    1.91
  -2  -3   4  257.14    2.18
   1   3  -4   50.78    2.30
   1   3  -4   52.65    2.62
  -1  -3   4   52.94    2.31
   0   3  -4    1.18    0.51
   0  -3   4    0.97    0.43
  -2   3  -4  800.33   17.77
  -2   3  -4  800.69   17.93
   2  -3   4  801.06   17.77
   2  -3   4  793.23   17.91
  -3   3  -4  188.82    4.35
  -3   3  -4  193.46    4.18
   3  -3   4  192.75    4.34
   3  -3   4  190.78    4.18
  -4   3  -4  282.81    7.05
  -4   3  -4  277.74    7.20
   4  -3   4  277.95    7.04
   4  -3   4  276.37    7.17
  -5   3  -4   30.57    1.13
  -5   3  -4   30.14    1.43
   5  -3   4   31.43    1.12
  -6   3  -4  422.24    9.54
  -6   3  -4  428.84    9.40
  -7   3  -4  457.52   11.50
  -7   3  -4  454.69   11.34
  -8   3  -4    4.64    0.85
  -8   3  -4    4.55    1.12
  -9   3  -4  268.20    6.09
  -9   3  -4  270.09    5.89
 -10   3  -4   14.57    1.43
 -11   3  -4    6.39    1.62
 -11   3  -4    6.02    1.34
 -12   3  -4   -0.27    1.28
 -12   3  -4    0.14    1.67
 -13   3  -4    5.01    1.69
 -13   3  -4    3.45    1.93
 -14   3  -4   92.31    3.67
 -14   3  -4   94.51    4.08
 -15   3  -4    3.79    1.91
 -15   3  -4    4.99    2.66
 -16   3  -4    0.09    2.78
 -16   3  -4    0.39    2.24
 -17   3  -4    0.91    2.39
 -17  -2   4    1.11    2.49
 -16  -2   4    4.08    2.10
 -15  -2   4   11.99    2.05
 -14  -2   4   38.45    2.11
 -13  -2   4   77.70    3.60
  12   2  -4   24.40    2.72
 -12  -2   4   23.75    1.44
 -11  -2   4  105.67    2.94
  10   2  -4  226.55    5.17
   9   2  -4   34.58    2.04
  -9  -2   4   34.78    1.12
  -9  -2   4   34.25    1.87
   8   2  -4   14.45    1.63
  -8  -2   4   14.21    0.90
  -8  -2   4   13.22    1.51
   7   2  -4  142.92    2.64
  -7  -2   4  141.83    2.65
  -7  -2   4  144.22    2.00
   6   2  -4   18.46    0.99
   6   2  -4   19.01    1.29
  -6  -2   4   18.43    0.63
  -6  -2   4   17.44    1.33
   5   2  -4    2.97    0.46
   5   2  -4    3.49    0.90
   5   2  -4    4.07    1.03
  -5  -2   4    3.00    1.16
  -5  -2   4    3.33    0.46
   4   2  -4  336.32    7.79
   4   2  -4  340.06    7.77
   4   2  -4  341.76    7.57
  -4  -2   4  341.16    7.57
   3   2  -4    7.10    0.72
  -3  -2   4    7.06    0.57
   1   2  -4  106.92    2.55
  -1  -2   4  107.43    2.55
  -1   2  -4   90.76    3.14
  -1   2  -4   91.04    2.91
   1  -2   4   92.01    2.90
   1  -2   4   92.59    3.11
  -2   2  -4  218.76    5.49
  -2   2  -4  218.95    5.31
   2  -2   4  224.61    5.47
   2  -2   4  222.25    5.31
  -3   2  -4    2.76    0.67
  -3   2  -4    2.95    0.42
   3  -2   4    3.03    0.63
  -4   2  -4    0.72    0.71
  -4   2  -4    0.40    0.41
   4  -2   4    0.36    0.37
   4  -2   4    0.18    0.50
  -5   2  -4  176.63    4.18
  -6   2  -4   27.54    1.21
  -6   2  -4   26.39    1.50
  -7   2  -4  229.34    6.23
  -7   2  -4  230.98    6.39
  -8   2  -4  155.59    2.80
  -8   2  -4  155.64    3.02
  -9   2  -4   18.03    1.63
  -9   2  -4   18.70    1.37
 -10   2  -4   73.01    3.84
 -10   2  -4   74.90    4.12
 -11   2  -4   54.38    2.15
 -11   2  -4   54.18    1.90
 -12   2  -4    3.69    1.37
 -12   2  -4    3.69    1.72
 -13   2  -4    3.12    2.02
 -13   2  -4    1.42    1.53
 -14   2  -4   29.59    2.60
 -14   2  -4   29.64    2.05
 -15   2  -4    2.84    2.00
 -15   2  -4    2.07    2.51
 -16   2  -4   -0.56    2.20
 -16   2  -4    0.17    2.99
 -17   2  -4    5.09    2.72
 -17  -1   4   -0.54    2.42
 -16  -1   4    6.52    2.18
 -15  -1   4    0.03    1.76
 -14  -1   4    0.77    1.48
 -13  -1   4   60.84    2.06
 -12  -1   4   21.22    1.35
  11   1  -4   78.03    5.24
 -11  -1   4   78.34    4.43
  10   1  -4    1.56    1.86
 -10  -1   4    1.70    0.95
 -10  -1   4    1.76    2.19
   9   1  -4   22.39    1.69
  -9  -1   4   23.21    0.89
  -9  -1   4   22.87    1.81
   8   1  -4   67.45    1.96
  -8  -1   4   65.07    1.86
  -8  -1   4   66.71    1.31
   7   1  -4    1.03    1.26
  -7  -1   4    1.58    0.64
  -7  -1   4    1.19    1.31
   6   1  -4  206.22    4.45
   6   1  -4  209.09    4.39
  -6  -1   4  211.99    4.15
  -6  -1   4  209.58    4.57
   5   1  -4    4.67    0.58
  -5  -1   4    4.84    1.17
  -5  -1   4    4.90    0.62
  -5  -1   4    4.56    0.89
   4   1  -4   48.05    1.47
   4   1  -4   47.25    1.62
   4   1  -4   46.52    1.05
  -4  -1   4   46.32    1.07
  -4  -1   4   45.62    1.67
   3   1  -4   88.86    2.10
   3   1  -4   89.03    2.40
   3   1  -4   86.32    1.86
  -3  -1   4   88.42    2.00
  -3  -1   4   87.21    1.88
  -3  -1   4   88.51    2.38
   2   1  -4    4.67    0.93
   2   1  -4    4.74    0.33
  -2  -1   4    3.86    0.77
  -2  -1   4    4.52    0.33
   1   1  -4   65.42    1.02
   0  -1   4  106.29    2.17
  -1   1  -4  329.56    5.44
   1  -1   4  333.76    5.61
   1  -1   4  333.16    5.43
  -2   1  -4  319.49   11.48
  -2   1  -4  317.92   11.31
   2  -1   4  319.86   11.31
   2  -1   4  317.02   11.43
  -3   1  -4   26.45    1.30
  -3   1  -4   26.09    1.57
   3  -1   4   25.83    1.26
   3  -1   4   26.75    1.46
  -4   1  -4   44.74    0.62
  -4   1  -4   44.78    0.90
   4  -1   4   45.56    0.78
   4  -1   4   45.22    0.63
  -5   1  -4   52.43    1.43
  -5   1  -4   52.21    1.17
   5  -1   4   52.01    1.24
  -6   1  -4   68.11    1.36
  -6   1  -4   66.06    1.62
  -7   1  -4  100.25    2.02
  -7   1  -4   97.15    2.22
  -8   1  -4  103.21    3.75
  -8   1  -4  106.69    3.57
 -10   1  -4  123.54    3.40
 -10   1  -4  126.68    3.68
 -11   1  -4    9.05    1.39
 -11   1  -4    7.30    1.65
 -12   1  -4    4.65    1.87
 -12   1  -4    3.45    1.46
 -13   1  -4    8.11    2.23
 -14   1  -4    4.91    1.71
 -14   1  -4    7.90    2.49
 -15   1  -4    8.16    2.25
 -16   1  -4    1.82    2.15
 -17   1  -4    1.43    2.67
 -18   0   4    1.54    2.46
 -17   0   4    3.53    2.19
 -16   0   4   -0.11    1.95
 -16   0   4   -0.05    1.84
 -15   0   4   11.46    1.74
 -14   0   4    2.88    1.55
 -13   0   4    9.98    1.31
 -12   0   4   12.61    1.75
 -11   0   4    9.80    1.18
  10   0  -4    4.89    2.12
   9   0  -4   28.47    2.75
  -9   0   4   27.65    1.93
   8   0  -4   13.26    1.77
  -8   0   4   13.14    1.12
   7   0  -4   54.92    1.80
  -7   0   4   56.84    1.32
  -7   0   4   54.74    1.89
   6   0  -4    0.98    1.02
   6   0  -4    0.94    1.03
  -6   0   4    1.59    1.13
  -6   0   4    0.62    0.49
   5   0  -4   80.59    2.46
   5   0  -4   81.49    2.04
   5   0  -4   80.44    2.37
  -5   0   4   80.86    2.07
  -5   0   4   79.63    2.52
  -5   0   4   79.53    2.28
   4   0  -4   43.61    2.35
   4   0  -4   44.08    2.58
  -4   0   4   43.40    2.61
   3   0  -4  869.73   21.99
   3   0  -4  887.43   22.27
  -3   0   4  883.24   22.26
   2   0  -4  102.64    2.91
   2   0  -4  102.77    3.32
   2   0  -4  102.31    2.83
  -2   0   4  103.11    3.27
  -2   0   4   99.74    2.83
  -2   0   4   99.99    2.88
   1   0  -4   46.78    0.35
   1   0  -4   46.55    0.36
  -1   0   4   46.64    0.37
  -1   0   4   47.16    0.72
   0   0  -4    8.53    0.86
  -1   0  -4  215.59    3.41
   1   0   4  214.42    3.37
  -2   0  -4  230.83   12.70
   2   0   4  238.87   12.69
   2   0   4  248.36   12.83
  -3   0  -4   91.74    1.25
  -3   0  -4   93.45    1.42
   3   0   4   91.72    1.21
   3   0   4   93.43    1.41
  -4   0  -4   85.61    2.35
  -4   0  -4   85.81    2.32
  -4   0  -4   85.02    2.07
   4   0   4   85.72    2.14
  -5   0  -4  436.18    9.89
  -5   0  -4  438.37    9.76
   5   0   4  440.13    9.79
  -6   0  -4   30.17    1.29
  -6   0  -4   31.66    1.66
  -7   0  -4   13.34    0.82
  -7   0  -4   13.72    1.10
  -8   0  -4   30.24    1.41
  -8   0  -4   28.97    1.10
  -9   0  -4  142.20    4.34
  -9   0  -4  138.76    4.08
 -10   0  -4   13.68    1.31
 -10   0  -4   15.05    1.79
 -11   0  -4   28.76    2.18
 -11   0  -4   26.18    1.61
 -12   0  -4    1.35    1.56
 -13   0  -4    0.87    1.63
 -14   0  -4   20.50    2.18
 -16   0  -4    9.01    2.71
 -18   1   4    1.88    2.39
 -17   1   4   17.00    2.55
 -17   1   4   15.27    2.17
 -16   1   4   80.05    4.01
 -15   1   4   -0.40    1.69
 -14   1   4   51.10    2.07
 -13   1   4    8.04    1.50
 -12   1   4   43.04    2.12
 -11   1   4  104.42    2.36
 -10   1   4   56.66    2.56
  -9   1   4  344.88    8.22
   8  -1  -4  275.53    6.96
  -8   1   4  270.74    6.59
   7  -1  -4   87.38    4.09
  -7   1   4   83.93    3.73
  -7   1   4   83.53    4.29
   6  -1  -4   96.61    2.76
  -6   1   4   96.27    2.97
  -6   1   4   98.34    2.40
   5  -1  -4    0.67    0.40
   5  -1  -4    0.69    0.83
   5  -1  -4    0.71    1.03
  -5   1   4    0.25    0.95
  -5   1   4    0.42    0.46
  -5   1   4    0.62    0.68
   4  -1  -4  288.42    8.91
   4  -1  -4  294.96    9.02
   4  -1  -4  288.34    9.21
  -4   1   4  284.54    8.92
  -4   1   4  289.09    9.24
  -4   1   4  291.70    8.99
   3  -1  -4  368.91    7.21
   3  -1  -4  368.02    6.93
  -3   1   4  369.54    6.87
  -3   1   4  368.66    6.92
  -3   1   4  366.59    7.21
   2  -1  -4   11.38    0.87
   2  -1  -4   10.73    1.59
  -2   1   4   10.40    1.51
  -2   1   4   11.89    0.96
  -2   1   4   10.12    0.85
   1  -1  -4  182.81    7.99
   1  -1  -4  181.29    8.28
  -1   1   4  188.57    8.01
  -1   1   4  181.21    8.25
   0  -1  -4  209.44    4.62
   0  -1  -4  204.74    4.29
   0   1   4  202.83    4.26
  -1  -1  -4  181.54    5.09
   1   1   4  179.37    5.04
  -2  -1  -4   18.85    0.77
  -2  -1  -4   18.49    0.78
   2   1   4   19.51    0.79
  -3  -1  -4  168.62    2.50
   3   1   4  172.92    2.64
  -4  -1  -4   43.15    1.13
  -5  -1  -4    9.14    0.88
   5   1   4    8.93    0.83
  -6  -1  -4   34.17    2.03
  -7  -1  -4   61.38    2.43
  -7  -1  -4   59.38    2.77
  -8  -1  -4   46.80    2.10
  -9  -1  -4    2.57    1.12
 -10  -1  -4   10.92    1.35
 -11  -1  -4  100.76    2.04
 -12  -1  -4   12.56    1.71
 -13  -1  -4    0.75    1.89
 -14  -1  -4   20.46    2.57
 -15  -1  -4   42.22    2.62
 -16  -1  -4    1.18    2.79
 -18   2   4    1.02    2.41
 -18   2   4    0.92    2.42
 -17   2   4    2.22    2.02
 -16   2   4   36.93    2.58
 -15   2   4    4.75    1.85
 -14   2   4   28.88    2.12
 -13   2   4   25.32    2.04
 -12   2   4  286.92    6.12
 -11   2   4   35.77    2.03
 -10   2   4   29.21    0.98
  -9   2   4    6.38    0.74
  -8   2   4   28.70    1.74
  -7   2   4   43.88    1.96
  -6   2   4  262.12    7.89
  -6   2   4  259.51    7.44
  -6   2   4  262.25    7.55
   5  -2  -4   14.67    1.78
   5  -2  -4   15.27    1.09
  -5   2   4   15.70    1.12
  -5   2   4   16.03    1.35
  -5   2   4   15.96    1.85
   4  -2  -4  943.83   25.02
  -4   2   4  935.52   24.74
  -4   2   4  931.57   24.77
  -4   2   4  950.41   25.07
   3  -2  -4    3.32    1.08
  -3   2   4    3.57    0.43
  -3   2   4    3.12    1.02
  -3   2   4    3.66    0.53
  -3   2   4    2.86    0.54
   2  -2  -4   44.74    3.03
   2  -2  -4   45.36    2.65
  -2   2   4   46.72    2.66
  -2   2   4   45.03    3.05
   1  -2  -4   20.52    1.27
   1  -2  -4   19.80    1.76
  -1   2   4   21.48    1.25
  -1   2   4   20.22    1.75
   0  -2  -4 1407.34   31.23
   0   2   4 1386.95   31.21
  -1  -2  -4  138.19    4.62
  -1  -2  -4  136.44    4.87
  -1  -2  -4  139.18    4.49
   1   2   4  133.46    4.55
  -2  -2  -4  208.90    2.66
  -2  -2  -4  205.49    2.70
   2   2   4  205.82    2.63
  -3  -2  -4    5.63    0.86
  -3  -2  -4    5.97    1.32
  -3  -2  -4    4.84    0.73
   3   2   4    5.27    0.92
  -4  -2  -4   46.41    1.52
  -4  -2  -4   48.71    1.71
   4   2   4   48.73    1.59
  -5  -2  -4    2.78    0.84
   5   2   4    2.57    0.69
  -7  -2  -4   83.54    1.41
  -8  -2  -4  259.73    4.53
  -9  -2  -4    5.94    1.45
 -10  -2  -4    0.77    1.42
 -11  -2  -4    1.82    1.61
 -12  -2  -4    0.95    1.80
 -13  -2  -4    1.90    2.05
 -14  -2  -4    6.43    2.22
 -15  -2  -4   19.61    2.71
 -18   3   4    1.89    2.32
 -17   3   4    1.37    2.01
 -16   3   4    1.44    1.77
 -15   3   4    2.18    1.53
 -14   3   4    8.83    1.39
 -13   3   4  114.33    3.31
 -12   3   4   83.15    3.54
 -11   3   4  112.19    2.58
 -10   3   4   62.78    2.44
  -9   3   4  214.86    8.14
  -8   3   4    7.53    0.66
  -7   3   4   44.67    1.76
  -6   3   4  342.87   10.45
  -6   3   4  343.90   10.36
   5  -3  -4   86.87    2.74
   5  -3  -4   82.73    2.10
  -5   3   4   84.45    2.83
  -5   3   4   86.44    2.28
  -5   3   4   83.02    2.15
   4  -3  -4   50.76    2.23
  -4   3   4   49.94    1.72
  -4   3   4   49.43    2.25
   3  -3  -4   93.24    2.20
  -3   3   4   90.03    1.75
  -3   3   4   92.45    2.19
   2  -3  -4   52.76    1.32
   2  -3  -4   51.88    1.80
  -2   3   4   52.75    1.74
  -2   3   4   51.28    1.33
   1  -3  -4  139.22    2.66
   1  -3  -4  138.62    2.34
  -1   3   4  141.71    2.72
  -1   3   4  139.51    2.35
   0  -3  -4  157.55    2.55
   0  -3  -4  157.68    2.80
   0   3   4  156.72    2.48
   0   3   4  156.89    2.81
  -1  -3  -4  208.36    3.16
  -1  -3  -4  212.21    3.62
   1   3   4  209.53    3.27
   1   3   4  206.79    3.17
  -2  -3  -4   50.42    1.89
  -2  -3  -4   50.36    2.36
  -2  -3  -4   48.06    1.99
   2   3   4   48.81    1.95
  -3  -3  -4    8.41    0.79
  -3  -3  -4    8.55    0.87
  -3  -3  -4    8.93    1.32
   3   3   4    8.71    0.95
   3   3   4    9.13    1.00
  -4  -3  -4    3.34    1.36
  -4  -3  -4    3.42    0.84
   4   3   4    3.25    1.10
   4   3   4    3.92    0.83
  -5  -3  -4   62.82    2.02
   5   3   4   60.32    2.40
  -6  -3  -4   68.98    1.22
  -7  -3  -4   18.35    1.27
  -8  -3  -4    7.44    1.40
  -9  -3  -4   32.66    1.45
 -10  -3  -4    4.98    1.80
 -11  -3  -4   67.62    3.12
 -12  -3  -4    0.48    1.90
 -13  -3  -4    1.66    2.24
 -14  -3  -4   29.31    2.67
 -15  -3  -4    4.29    2.71
 -19   4   4    3.75    2.61
 -18   4   4   -0.20    2.18
 -17   4   4    0.05    1.88
 -16   4   4   17.43    2.10
 -15   4   4   17.77    1.71
 -14   4   4    0.21    1.41
 -13   4   4    2.60    1.36
 -12   4   4   71.51    2.70
 -11   4   4   11.05    1.09
 -10   4   4   72.73    3.11
  -9   4   4  212.44    6.21
  -8   4   4    0.19    0.67
  -7   4   4   23.95    0.66
  -6   4   4    8.43    1.05
  -6   4   4    9.36    0.83
  -5   4   4   86.95    2.97
   4  -4  -4   10.60    1.07
  -4   4   4   10.81    0.73
  -4   4   4   10.30    0.44
  -4   4   4   10.46    1.26
   3  -4  -4  192.44    7.59
   3  -4  -4  190.87    7.88
  -3   4   4  192.20    7.61
  -3   4   4  190.35    7.93
   2  -4  -4  126.39    3.74
   2  -4  -4  129.30    3.46
  -2   4   4  128.60    3.78
  -2   4   4  130.53    3.48
   1  -4  -4    8.44    1.80
   1  -4  -4    9.47    1.41
  -1   4   4    8.46    1.39
  -1   4   4    8.89    1.82
   0  -4  -4    9.79    1.17
   0  -4  -4    9.54    0.88
   0   4   4    9.97    1.21
   0   4   4    9.53    0.55
  -1  -4  -4    2.05    1.24
   1   4   4    1.92    0.79
   1   4   4    1.83    1.22
  -2  -4  -4  203.15    4.88
  -2  -4  -4  197.43    4.70
  -2  -4  -4  200.06    5.01
   2   4   4  196.34    4.74
  -3  -4  -4   15.85    1.02
  -3  -4  -4   15.09    0.94
  -3  -4  -4   14.98    1.30
   3   4   4   15.73    1.03
   3   4   4   15.05    1.10
   4   4   4  136.48    2.33
  -5  -4  -4   31.61    1.10
   5   4   4   32.51    1.60
  -6  -4  -4    2.25    1.22
   6   4   4    1.93    1.71
  -7  -4  -4   32.00    1.30
  -8  -4  -4   71.25    2.61
  -9  -4  -4   13.60    1.66
 -10  -4  -4   23.00    2.12
 -11  -4  -4    7.26    1.95
 -12  -4  -4    1.77    2.10
 -13  -4  -4   -0.58    2.30
 -14  -4  -4   14.84    2.75
 -19   5   4    1.14    2.58
 -18   5   4   -0.50    2.03
 -17   5   4   -0.25    1.80
 -16   5   4    2.44    1.78
 -15   5   4   30.74    2.19
 -14   5   4   20.38    1.59
 -13   5   4    2.05    1.27
 -12   5   4    9.38    1.39
 -11   5   4   16.13    1.78
 -10   5   4   12.81    1.13
  -9   5   4   30.02    1.78
  -8   5   4    3.58    0.77
  -7   5   4    1.70    0.66
  -7   5   4    2.09    0.75
  -6   5   4   28.63    1.16
  -5   5   4   86.35    2.52
   4  -5  -4    1.20    1.13
  -4   5   4    0.71    0.44
   3  -5  -4   99.10    5.15
   3  -5  -4   99.74    4.81
   2  -5  -4  158.21    3.08
   2  -5  -4  160.63    3.44
  -2   5   4  158.79    3.48
   1  -5  -4    0.92    0.91
   1  -5  -4    1.78    1.18
  -1   5   4    1.42    0.60
  -1   5   4    2.18    1.26
   0  -5  -4  254.34    6.11
   0  -5  -4  251.90    5.99
   0   5   4  247.55    5.74
   0   5   4  254.08    6.23
  -1  -5  -4   46.26    1.42
  -1  -5  -4   46.89    1.56
  -1  -5  -4   47.05    1.98
   1   5   4   45.59    1.43
   1   5   4   46.89    1.88
  -2  -5  -4  436.59    7.14
  -2  -5  -4  438.23    7.30
  -2  -5  -4  441.29    7.36
   2   5   4  442.17    7.18
  -3  -5  -4   56.28    1.52
  -3  -5  -4   58.36    1.72
  -4  -5  -4   73.48    2.12
   4   5   4   72.22    2.40
  -5  -5  -4    0.52    1.29
   5   5   4    0.13    1.67
  -6  -5  -4  140.99    2.53
   6   5   4  139.19    3.12
  -7  -5  -4    0.02    1.39
   7   5   4    1.35    2.18
  -8  -5  -4   82.58    2.05
  -9  -5  -4   11.37    1.80
 -10  -5  -4    2.50    1.93
 -11  -5  -4   11.16    2.13
 -12  -5  -4    2.31    2.29
 -13  -5  -4    3.36    2.86
 -14  -5  -4    3.85    3.21
 -19   6   4   -0.51    2.01
 -18   6   4    0.71    2.01
 -17   6   4   -0.41    1.78
 -16   6   4    1.97    1.63
 -15   6   4  100.92    3.68
 -14   6   4   19.40    1.71
 -13   6   4    4.00    1.22
 -12   6   4  171.28    4.87
 -11   6   4    5.13    1.14
 -10   6   4    0.62    0.86
  -9   6   4    2.88    0.83
  -8   6   4   10.83    0.89
  -7   6   4   11.32    0.93
  -6   6   4  272.48    7.77
  -5   6   4   79.92    2.05
   3  -6  -4  444.66    8.03
   2  -6  -4  104.50    2.99
   2  -6  -4  107.53    2.74
   1  -6  -4   70.07    2.24
   1  -6  -4   70.11    1.91
  -1   6   4   70.45    1.43
  -1   6   4   68.84    2.29
   0  -6  -4    4.02    1.32
   0  -6  -4    3.47    1.14
   0   6   4    4.33    0.83
   0   6   4    3.36    1.55
  -1  -6  -4    7.18    1.35
  -1  -6  -4    7.09    1.17
   1   6   4    6.67    1.02
   1   6   4    6.42    1.63
  -2  -6  -4    6.42    1.13
  -2  -6  -4    6.53    1.35
  -2  -6  -4    6.32    1.21
   2   6   4    5.67    1.59
   2   6   4    7.47    1.19
  -3  -6  -4    1.70    1.38
  -3  -6  -4    0.59    1.21
  -4  -6  -4  365.88    6.14
   4   6   4  362.76    6.18
  -5  -6  -4   82.34    1.72
  -6  -6  -4   25.92    1.69
   6   6   4   23.65    2.14
  -7  -6  -4   23.96    1.51
   7   6   4   26.12    2.33
  -8  -6  -4    1.29    1.79
   8   6   4    2.25    2.78
  -9  -6  -4   31.04    1.90
 -10  -6  -4   24.03    2.10
 -11  -6  -4   12.53    2.36
 -12  -6  -4   -0.66    2.69
 -13  -6  -4   -0.58    2.79
 -19   7   4    4.32    2.39
 -18   7   4    2.04    1.95
 -17   7   4    7.14    1.96
 -16   7   4   48.35    2.49
 -15   7   4    4.59    1.60
 -14   7   4   19.32    2.00
 -13   7   4   12.69    1.40
 -12   7   4  156.38    5.72
 -11   7   4   73.34    2.50
 -10   7   4   80.74    2.82
  -9   7   4   48.98    2.06
  -8   7   4   53.17    1.45
  -7   7   4    3.11    0.83
  -6   7   4  225.47    5.42
  -5   7   4  170.64    4.37
   4  -7  -4  132.30    3.50
   3  -7  -4  183.44    5.17
   2  -7  -4   35.37    1.08
   1  -7  -4    3.03    1.17
  -1   7   4    3.20    0.91
   0  -7  -4  147.39    2.68
   0  -7  -4  146.83    2.82
   0   7   4  143.11    3.08
   0   7   4  145.89    2.30
  -1  -7  -4   46.13    1.61
  -1  -7  -4   44.29    1.46
   1   7   4   44.87    1.39
  -2  -7  -4   37.89    1.49
   2   7   4   38.68    1.46
  -3  -7  -4   63.80    1.63
  -4  -7  -4   23.07    2.06
   4   7   4   21.41    2.15
  -5  -7  -4   16.68    1.64
   5   7   4   17.95    2.08
  -6  -7  -4   42.55    1.78
   6   7   4   41.36    2.49
  -7  -7  -4    6.13    1.78
   7   7   4    6.43    2.62
  -8  -7  -4   69.46    2.28
   8   7   4   68.42    3.04
 -10  -7  -4   12.70    2.25
 -11  -7  -4    1.55    2.47
 -12  -7  -4    1.22    2.76
 -13  -7  -4   30.98    3.37
 -19   8   4   -0.51    2.15
 -18   8   4    1.80    2.04
 -17   8   4    2.22    1.89
 -16   8   4    4.00    1.66
 -15   8   4   47.59    3.44
 -14   8   4   11.25    1.34
 -13   8   4    1.24    1.20
 -12   8   4   67.41    2.41
 -11   8   4    5.09    1.10
 -10   8   4   41.53    2.03
  -9   8   4   66.89    1.63
  -8   8   4    5.43    0.83
  -7   8   4   19.15    1.23
  -6   8   4   43.27    1.00
   4  -8  -4  218.45    6.37
   3  -8  -4    4.38    1.33
   2  -8  -4   74.85    2.02
  -2   8   4   73.59    1.54
   1  -8  -4   14.73    1.72
  -1   8   4   15.00    1.49
   0  -8  -4  422.28    5.99
   0   8   4  413.00    5.67
  -1  -8  -4   83.51    3.28
   1   8   4   84.19    3.05
  -2  -8  -4  312.37    5.04
   2   8   4  317.21    4.80
  -3  -8  -4   35.04    1.54
   3   8   4   38.41    1.80
  -4  -8  -4    0.82    1.69
   4   8   4    0.41    2.07
   5   8   4   18.13    2.36
  -6  -8  -4   10.37    1.84
   6   8   4   10.43    2.58
  -7  -8  -4    5.54    1.90
   7   8   4    8.62    3.07
   8   8   4   38.72    3.27
  -9  -8  -4    6.41    2.30
 -10  -8  -4    8.74    2.40
 -11  -8  -4    3.76    3.02
 -12  -8  -4   27.26    3.48
 -19   9   4    5.15    2.24
 -18   9   4   14.94    2.22
 -17   9   4    0.29    1.88
 -16   9   4    6.44    1.78
 -15   9   4   14.47    1.64
 -14   9   4    6.02    1.41
 -13   9   4   16.78    1.30
 -12   9   4  203.16    6.62
 -11   9   4   86.33    3.37
 -10   9   4   94.07    2.96
  -9   9   4   84.00    2.91
  -8   9   4   26.49    1.86
  -7   9   4    6.93    1.12
  -6   9   4  132.50    3.03
   4  -9  -4  362.04    8.80
   3  -9  -4   45.78    1.80
   2  -9  -4   83.65    1.58
  -2   9   4   82.25    1.22
   1  -9  -4   39.24    1.61
  -1   9   4   39.94    1.29
   0  -9  -4   19.01    2.13
   0   9   4   17.95    1.71
   1   9   4    6.78    1.86
  -2  -9  -4   96.55    3.26
   2   9   4   99.48    3.09
  -3  -9  -4   92.50    2.39
  -4  -9  -4   29.84    1.86
   4   9   4   30.39    2.26
  -5  -9  -4    0.48    2.03
   5   9   4    0.49    2.60
  -6  -9  -4   35.48    2.32
   6   9   4   36.19    2.82
  -7  -9  -4    0.68    2.40
   7   9   4    2.76    3.28
  -8  -9  -4   15.01    2.53
   8   9   4   16.56    3.61
  -9  -9  -4    1.61    2.73
   9   9   4    0.79    4.17
 -10  -9  -4    8.61    2.95
 -11  -9  -4   40.54    3.41
 -19  10   4    2.03    2.33
 -18  10   4   22.06    2.79
 -17  10   4    1.78    1.96
 -16  10   4   25.07    2.22
 -15  10   4   24.56    2.00
 -14  10   4    0.82    1.41
 -13  10   4   38.41    1.91
 -12  10   4   27.29    2.19
 -11  10   4   19.89    1.48
 -10  10   4    7.91    1.37
  -9  10   4   23.57    1.42
  -8  10   4  101.26    3.42
  -7  10   4    3.59    0.84
  -6  10   4   32.14    1.51
   5 -10  -4    6.10    1.38
   4 -10  -4   69.86    2.48
   3 -10  -4  126.10    2.80
   2 -10  -4   11.80    1.48
  -2  10   4   11.88    1.19
   1 -10  -4  160.28    3.25
  -1  10   4  161.85    2.70
   0 -10  -4   19.64    2.00
   0  10   4   18.71    1.81
  -1 -10  -4   25.17    1.83
  -2 -10  -4   23.44    1.90
   2  10   4   24.52    2.00
  -3 -10  -4   61.47    2.16
   3  10   4   63.69    2.33
  -4 -10  -4   -0.43    1.98
   4  10   4    2.77    2.69
  -5 -10  -4   12.91    2.21
   5  10   4   12.74    2.72
  -6 -10  -4   -0.16    2.24
   6  10   4    1.80    3.17
  -7 -10  -4    5.34    2.53
   7  10   4    7.69    3.55
  -8 -10  -4   13.79    3.04
   8  10   4   13.01    4.03
  -9 -10  -4   18.45    3.17
   9  10   4   19.97    4.50
 -10 -10  -4    3.05    3.23
 -19  11   4    3.52    2.34
 -18  11   4   10.79    2.42
 -17  11   4    0.58    1.77
 -16  11   4    8.43    2.03
 -15  11   4    2.04    1.51
 -14  11   4   30.64    1.91
 -13  11   4    0.90    1.28
 -12  11   4    1.06    1.16
 -11  11   4   63.12    1.89
 -10  11   4    0.09    1.02
  -9  11   4   49.24    2.10
  -8  11   4    2.78    1.02
  -7  11   4   11.45    0.83
  -6  11   4    7.88    0.90
   5 -11  -4   25.86    1.75
   4 -11  -4   90.43    2.61
   3 -11  -4    3.22    1.67
  -3  11   4    3.30    1.44
   2 -11  -4  134.03    2.22
  -2  11   4  136.89    2.25
   1 -11  -4   31.38    1.99
  -1  11   4   31.95    1.71
   0 -11  -4    2.48    1.86
   0  11   4    1.94    1.78
  -1 -11  -4  174.57    2.52
   1  11   4  175.82    2.46
  -2 -11  -4    4.86    2.15
   2  11   4    3.83    2.30
  -3 -11  -4    5.29    2.33
   3  11   4    4.74    2.46
  -4 -11  -4   14.09    2.64
  -5 -11  -4    7.31    2.57
   5  11   4    8.34    3.30
  -6 -11  -4    3.20    2.63
   6  11   4    4.08    3.41
   7  11   4    3.02    3.93
  -8 -11  -4    0.29    3.01
   8  11   4    0.88    4.40
  -9 -11  -4   23.07    3.44
   9  11   4   24.56    5.02
 -10 -11  -4    2.33    3.66
 -19  12   4    2.11    2.24
 -18  12   4    1.22    2.00
 -17  12   4    1.09    1.88
 -16  12   4   19.98    2.23
 -15  12   4    0.94    1.52
 -14  12   4    1.56    1.56
 -13  12   4   -0.20    1.28
 -12  12   4   45.16    1.76
 -11  12   4    9.23    1.16
 -10  12   4   90.43    2.87
  -9  12   4    6.72    1.10
  -8  12   4    7.75    1.02
  -7  12   4   34.16    1.04
   5 -12  -4    5.67    1.62
   4 -12  -4   33.14    1.59
   3 -12  -4   10.90    1.74
  -3  12   4   10.91    1.54
   2 -12  -4   12.29    1.73
  -2  12   4   12.27    1.61
  -1  12   4    1.81    1.72
   0 -12  -4   89.48    2.07
   0  12   4   90.09    2.05
  -1 -12  -4  141.96    3.25
   1  12   4  144.06    3.60
  -2 -12  -4    9.04    2.45
   3  12   4   19.02    2.72
  -4 -12  -4    3.16    2.59
   4  12   4    3.87    3.14
  -5 -12  -4   -0.24    2.69
   5  12   4    1.09    3.46
  -6 -12  -4    2.19    3.23
   6  12   4    4.33    3.79
  -7 -12  -4    1.65    3.08
   7  12   4    3.46    4.28
  -8 -12  -4    8.37    3.64
   8  12   4    6.52    4.77
  -9 -12  -4    4.39    3.90
 -18  13   4    5.47    2.27
 -17  13   4   -0.31    1.91
 -16  13   4   -0.45    1.70
 -15  13   4   13.92    1.82
 -14  13   4    2.73    1.60
 -13  13   4    1.00    1.33
 -12  13   4   10.45    1.40
 -11  13   4    0.36    1.24
 -10  13   4   11.80    1.25
  -9  13   4    5.62    1.13
  -8  13   4   68.78    1.47
  -7  13   4   51.49    1.51
   5 -13  -4   61.29    3.19
   4 -13  -4   61.40    1.93
   3 -13  -4   47.01    2.50
  -3  13   4   47.67    2.14
   2 -13  -4   29.32    1.95
  -2  13   4   30.49    1.84
   1 -13  -4    6.73    2.10
  -1  13   4    7.60    2.07
   0 -13  -4   67.81    2.23
   0  13   4   72.74    2.37
  -1 -13  -4   56.27    2.41
   1  13   4   58.12    2.77
  -2 -13  -4    5.59    2.49
   2  13   4    6.68    2.79
  -3 -13  -4   15.63    2.65
   3  13   4   15.71    2.89
  -4 -13  -4   38.78    2.85
   4  13   4   36.89    3.45
  -5 -13  -4    9.08    3.07
   5  13   4    9.14    3.73
  -6 -13  -4    2.55    3.17
   6  13   4    3.27    4.16
  -7 -13  -4    3.53    3.84
   7  13   4    3.95    4.81
   8  13   4    3.13    5.26
 -18  14   4   11.56    2.50
 -17  14   4    1.25    1.88
 -16  14   4   -0.15    1.68
 -15  14   4    0.70    1.71
 -14  14   4    5.28    1.63
 -13  14   4    2.23    1.40
 -12  14   4    0.39    1.44
 -11  14   4   20.82    1.86
 -10  14   4   17.35    1.41
  -9  14   4   12.61    1.22
  -8  14   4   78.64    2.49
  -7  14   4    3.04    1.21
   5 -14  -4    4.14    2.02
   4 -14  -4   -0.39    2.01
  -4  14   4   -0.29    1.93
   3 -14  -4    8.83    2.33
  -3  14   4    9.36    2.10
   2 -14  -4    7.20    2.23
  -2  14   4    4.83    2.11
   1 -14  -4   15.74    2.56
   0 -14  -4   41.67    2.49
  -1 -14  -4   36.34    2.87
   1  14   4   34.76    3.11
  -2 -14  -4    7.95    3.05
  -3 -14  -4   35.64    3.09
   3  14   4   30.58    3.46
  -4 -14  -4   10.89    3.10
   4  14   4   11.77    3.79
  -5 -14  -4    2.16    3.35
  -6 -14  -4   -0.83    3.46
   6  14   4    3.61    4.66
   7  14   4   12.27    5.40
 -17  15   4   -0.50    1.92
 -16  15   4    7.10    2.04
 -15  15   4    1.25    1.59
 -14  15   4   11.99    1.61
 -13  15   4    0.69    1.46
 -12  15   4   26.22    2.06
 -11  15   4   41.37    1.89
 -10  15   4    2.46    1.30
  -9  15   4   13.87    1.51
  -8  15   4    3.81    1.31
  -7  15   4    2.14    1.26
   5 -15  -4   27.96    2.49
   4 -15  -4   -0.03    2.14
  -4  15   4    0.50    2.23
   3 -15  -4    1.61    2.48
  -3  15   4    2.60    2.24
   2 -15  -4   23.45    2.58
  -2  15   4   21.06    2.30
   1 -15  -4    0.52    2.53
  -1  15   4   -0.68    2.66
   0 -15  -4    6.27    2.71
   0  15   4    6.35    2.88
  -1 -15  -4    6.24    2.74
  -2 -15  -4    0.71    2.78
   2  15   4   -0.46    3.31
  -3 -15  -4    3.53    3.27
   3  15   4    3.43    3.67
  -4 -15  -4    0.81    3.58
   4  15   4    2.13    4.22
  -5 -15  -4    3.83    3.67
   5  15   4   -1.03    4.33
   6  15   4    6.01    5.15
 -17  16   4   -0.07    2.08
 -16  16   4    7.95    2.00
 -15  16   4    2.32    1.80
 -14  16   4   -0.14    1.60
 -13  16   4    1.12    1.58
 -12  16   4    1.48    1.53
 -11  16   4   62.82    2.31
 -10  16   4    3.35    1.50
  -9  16   4   -0.33    1.38
  -8  16   4   11.10    1.44
  -7  16   4    2.14    1.49
   5 -16  -4   15.49    2.69
  -5  16   4   12.37    2.49
   4 -16  -4   -0.42    2.33
  -4  16   4    1.71    2.50
   3 -16  -4   43.76    2.60
  -3  16   4   45.11    2.63
   2 -16  -4    9.25    2.74
  -2  16   4   10.84    2.91
   1 -16  -4   24.40    2.65
  -1  16   4   22.68    2.74
   0 -16  -4   12.92    3.06
   0  16   4   10.84    3.29
  -1 -16  -4   -0.12    3.07
   1  16   4    0.78    3.49
  -2 -16  -4    1.53    3.24
   2  16   4    2.27    3.66
  -3 -16  -4    4.64    3.54
   3  16   4    7.08    4.11
  -4 -16  -4    0.93    3.84
   4  16   4    0.80    4.31
 -16  17   4   13.43    2.12
 -15  17   4    7.79    1.98
 -14  17   4    0.19    1.72
 -13  17   4    5.82    1.86
 -12  17   4    9.59    1.80
 -11  17   4   17.12    1.64
 -10  17   4   -0.29    1.54
  -9  17   4    1.43    1.60
  -8  17   4   42.15    1.71
  -7  17   4    0.70    1.56
  -6  17   4    2.25    2.94
   5 -17  -4    9.17    2.86
  -5  17   4    6.37    3.10
   4 -17  -4   19.27    2.88
  -4  17   4   18.01    2.97
   3 -17  -4    1.47    2.88
  -3  17   4    0.73    2.88
   2 -17  -4    2.70    2.83
  -2  17   4    4.92    2.81
   1 -17  -4    5.34    3.24
  -1  17   4    3.25    3.18
   0 -17  -4   11.78    3.43
   0  17   4   12.95    3.76
  -1 -17  -4    7.40    3.38
   1  17   4    7.86    3.67
  -2 -17  -4    0.87    3.72
   2  17   4    0.07    4.01
  -3 -17  -4    7.11    3.95
   3  17   4    7.47    4.41
 -15  18   4   -0.13    2.01
 -14  18   4    4.57    1.90
 -13  18   4   -0.46    1.82
 -12  18   4   10.96    1.99
 -11  18   4    4.14    1.80
 -10  18   4    3.22    1.71
  -9  18   4    3.99    1.76
  -8  18   4   17.88    1.63
  -7  18   4    0.95    1.64
  -6  18   4    0.50    2.94
   5 -18  -4    0.18    2.78
  -5  18   4    0.14    2.95
   4 -18  -4   -0.09    3.25
  -4  18   4    3.11    2.99
   3 -18  -4    1.24    3.44
  -3  18   4    1.10    3.16
   2 -18  -4   19.83    3.39
  -2  18   4   19.07    3.38
   1 -18  -4    3.85    3.22
  -1  18   4    5.62    3.54
   0 -18  -4    1.30    3.56
   0  18   4    0.38    3.78
  -1 -18  -4    1.70    3.86
   1  18   4    4.32    4.05
 -14  19   4    4.35    2.17
 -13  19   4    0.52    2.04
 -12  19   4    2.18    1.92
 -11  19   4    9.43    1.88
 -10  19   4    5.09    1.87
  -9  19   4    2.68    1.99
  -8  19   4    0.87    1.76
  -7  19   4   10.90    3.84
  -6  19   4    5.45    3.48
   5 -19  -4    0.90    3.18
   4 -19  -4    3.29    3.33
  -4  19   4    1.83    3.28
   3 -19  -4    2.90    3.63
  -3  19   4    5.20    3.40
   2 -19  -4    1.16    3.81
  -2  19   4   -0.60    3.51
   1 -19  -4   -0.79    3.54
  -1  19   4    0.16    4.05
   0 -19  -4   13.33    3.95
   0  19   4   16.17    4.14
 -13  20   4    4.70    2.39
 -12  20   4    0.99    2.11
 -11  20   4    8.25    2.07
 -10  20   4    1.49    1.84
  -9  20   4    1.10    2.00
  -8  20   4    1.75    1.95
  -7  20   4    0.28    3.77
  -7  20   4    2.50    1.97
  -6  20   4    2.70    3.72
   5 -20  -4   -0.18    3.61
  -5  20   4    2.57    3.61
   4 -20  -4   -0.71    3.74
  -4  20   4   -0.69    3.66
  -3  20   4    0.11    4.68
  -9  21   4    1.73    2.27
  -8  21   4   11.85    6.17
  -7  21   4    7.98    2.21
  -4  23  -5    3.56    2.12
  -4  23  -5    4.17    4.38
  -4  23  -5    2.80    5.03
  -5  23  -5   -0.40    4.91
  -5  23  -5    0.45    4.14
  -6  23  -5    2.66    2.07
  -6  23  -5    2.95    4.21
  -7  23  -5    5.32    4.03
  -7  23  -5    7.29    2.04
  -8  23  -5   24.35    4.39
  -8  23  -5   23.49    2.29
  -9  23  -5    3.86    2.29
  -9  23  -5    2.90    3.71
 -10  23  -5    0.99    3.58
 -10  23  -5   -0.18    2.23
  -1  22  -5   14.54    4.77
  -1  22  -5   13.51    3.64
   1 -22   5   12.15    3.53
  -2  22  -5    3.06    4.62
  -2  22  -5    5.51    3.76
   2 -22   5    5.04    3.31
  -3  22  -5    3.51    3.83
  -3  22  -5    3.85    4.62
   3 -22   5    2.73    3.07
  -4  22  -5    1.71    4.36
  -4  22  -5    2.48    3.75
  -5  22  -5    1.24    1.95
  -5  22  -5    2.21    3.83
  -6  22  -5    2.96    3.50
  -6  22  -5    2.33    1.79
  -7  22  -5    7.03    1.80
  -7  22  -5    8.78    3.46
  -8  22  -5   48.13    4.11
  -8  22  -5   49.12    2.49
  -9  22  -5    9.93    3.58
  -9  22  -5    8.99    2.15
 -10  22  -5   -0.11    2.04
 -10  22  -5    1.43    3.36
 -11  22  -5    1.33    2.02
 -11  22  -5    1.03    3.16
 -12  22  -5    3.95    2.11
 -12  22  -5    3.55    3.28
 -13  22  -5    1.79    3.77
 -13  22  -5    3.37    2.19
   1  21  -5    8.35    4.58
  -1 -21   5   13.55    3.86
   0  21  -5    4.58    3.60
   0  21  -5    0.68    4.34
   0 -21   5    0.91    3.46
  -1  21  -5    7.24    4.25
  -1  21  -5    7.53    3.60
   1 -21   5    3.24    3.24
  -2  21  -5    6.79    3.58
  -2  21  -5    7.11    4.24
   2 -21   5    5.40    3.22
  -3  21  -5    3.12    3.56
   3 -21   5    2.85    2.80
  -4  21  -5    1.88    3.45
  -5  21  -5    7.57    1.87
  -5  21  -5    7.07    3.19
  -6  21  -5    2.68    3.12
  -6  21  -5    1.82    1.67
  -7  21  -5    6.29    3.37
  -7  21  -5    4.79    1.62
  -8  21  -5    3.52    1.71
  -8  21  -5    3.21    2.90
  -9  21  -5    4.18    2.79
  -9  21  -5    4.13    1.77
 -10  21  -5    4.63    1.82
 -10  21  -5    1.90    3.20
 -11  21  -5    6.49    3.13
 -11  21  -5    5.85    1.93
 -12  21  -5    1.54    3.67
 -12  21  -5    1.51    2.01
 -13  21  -5   -0.39    1.92
 -13  21  -5   -0.06    3.14
 -14  21  -5    7.10    3.53
 -14  21  -5    6.96    2.20
   3  20  -5    0.09    4.53
  -3 -20   5    0.34    3.58
   2  20  -5   -0.62    4.33
  -2 -20   5   -0.38    3.40
   1  20  -5    4.86    4.26
   1  20  -5    8.30    4.11
  -1 -20   5    3.88    3.27
   0  20  -5    3.34    3.16
   0  20  -5    5.76    3.93
   0 -20   5    4.12    3.02
  -1  20  -5    9.92    3.72
  -1  20  -5   13.31    3.21
   1 -20   5   10.63    2.92
  -2  20  -5    2.95    3.68
  -2  20  -5    5.59    3.21
   2 -20   5    3.19    2.77
  -3  20  -5    2.08    2.95
   3 -20   5    2.67    2.57
  -4  20  -5   10.38    3.27
  -5  20  -5    1.52    2.78
  -5  20  -5    2.25    1.64
  -6  20  -5    2.89    1.55
  -6  20  -5    3.42    3.05
  -7  20  -5    3.72    2.99
  -7  20  -5    4.91    1.64
  -8  20  -5    0.48    2.68
  -8  20  -5   -0.30    1.56
  -9  20  -5    1.95    2.87
  -9  20  -5    4.11    1.73
 -10  20  -5   14.71    2.97
 -10  20  -5   17.32    1.84
 -11  20  -5    0.40    1.73
 -12  20  -5    0.39    3.19
 -12  20  -5    2.13    1.90
 -13  20  -5    9.99    2.15
 -13  20  -5    8.29    3.19
 -14  20  -5    0.90    3.42
 -14  20  -5   -0.50    1.95
 -15  20  -5    0.58    3.42
 -15  20  -5    0.82    2.10
   4  19  -5    6.78    4.43
  -4 -19   5    8.03    3.83
   3  19  -5   -0.35    4.11
  -3 -19   5   -0.18    3.46
  -2 -19   5    7.49    3.24
   1  19  -5    9.24    3.39
   1  19  -5    9.64    3.07
  -1 -19   5    9.31    3.11
   0  19  -5    2.79    3.41
   0  19  -5    1.69    2.76
   0 -19   5    0.85    2.95
  -1  19  -5    2.84    3.41
  -1  19  -5    2.36    2.89
   1 -19   5    3.90    2.88
  -2  19  -5   22.01    3.20
   2 -19   5   23.31    2.54
  -3  19  -5    0.00    2.79
  -3  19  -5   -0.25    3.07
   3 -19   5    2.51    2.47
  -4  19  -5   18.27    2.73
  -5  19  -5    2.74    2.73
  -5  19  -5    2.07    1.53
  -6  19  -5    5.83    2.82
  -6  19  -5    3.62    1.47
  -7  19  -5    0.73    2.51
  -7  19  -5    1.54    1.42
  -8  19  -5    1.36    1.48
  -8  19  -5    0.25    2.73
  -9  19  -5   15.09    1.71
  -9  19  -5   15.42    2.93
 -10  19  -5   12.60    1.80
 -10  19  -5    9.75    3.16
 -11  19  -5    1.24    2.80
 -11  19  -5    0.46    1.53
 -12  19  -5    3.24    1.75
 -12  19  -5    1.92    3.20
 -13  19  -5    8.65    3.67
 -13  19  -5    6.64    1.93
 -14  19  -5    0.45    1.84
 -14  19  -5   -0.76    3.10
 -15  19  -5    0.74    3.75
 -15  19  -5    1.04    1.96
 -16  19  -5    3.47    3.97
 -16  19  -5    0.65    2.04
   6  18  -5   15.86    4.76
  -6 -18   5   16.37    4.20
   5  18  -5    3.33    4.45
  -5 -18   5    1.86    3.75
   4  18  -5   25.01    3.77
  -4 -18   5   25.89    3.43
  -3 -18   5    2.12    3.33
   2  18  -5    6.47    2.50
   2  18  -5    5.70    3.26
  -2 -18   5    5.76    3.05
   1  18  -5    1.72    2.52
   1  18  -5    2.23    3.30
  -1 -18   5    0.03    2.76
   0  18  -5   24.60    3.14
   0  18  -5   23.62    2.70
   0 -18   5   21.42    2.51
  -1  18  -5   -0.13    2.42
  -1  18  -5    1.78    3.08
   1 -18   5   -0.60    2.49
  -2  18  -5   81.11    3.17
  -2  18  -5   83.70    3.03
   2 -18   5   79.11    2.64
  -3  18  -5    5.75    2.38
   3 -18   5    7.82    2.16
  -4  18  -5    0.13    2.22
  -5  18  -5    0.43    2.29
  -5  18  -5   -0.03    1.22
  -6  18  -5   15.46    1.22
  -6  18  -5   14.40    2.41
  -7  18  -5    1.75    2.38
  -7  18  -5    1.99    1.21
  -8  18  -5   14.76    1.45
  -8  18  -5   14.70    2.39
  -9  18  -5   34.71    3.59
  -9  18  -5   36.98    2.56
 -10  18  -5   20.16    3.21
 -10  18  -5   20.00    1.74
 -11  18  -5    3.65    2.68
 -11  18  -5    3.68    1.65
 -12  18  -5    2.82    2.91
 -12  18  -5    3.72    1.76
 -13  18  -5    4.21    2.97
 -13  18  -5    3.65    1.75
 -14  18  -5    1.98    3.34
 -14  18  -5    0.62    1.81
 -15  18  -5    6.66    3.68
 -15  18  -5    4.24    1.92
 -16  18  -5    2.57    3.74
 -16  18  -5    1.69    2.14
   7  17  -5    4.21    4.52
  -7 -17   5    9.30    4.04
   6  17  -5   20.67    4.14
  -6 -17   5   23.46    3.79
   5  17  -5    3.83    3.70
   4  17  -5   39.22    3.36
  -4 -17   5   37.42    3.24
   3  17  -5   24.95    3.37
  -3 -17   5   24.11    3.15
   2  17  -5   10.36    2.41
   2  17  -5   11.57    3.01
  -2 -17   5   11.87    2.79
   1  17  -5    1.00    2.36
   1  17  -5    0.86    2.82
  -1 -17   5    1.60    2.65
   0  17  -5   17.73    2.32
   0  17  -5   18.14    2.84
   0 -17   5   16.81    2.46
  -1  17  -5   11.97    2.57
  -1  17  -5   11.18    2.79
   1 -17   5    8.94    2.20
  -2  17  -5  122.94    3.25
   2 -17   5  124.82    2.70
  -3  17  -5    2.46    2.19
   3 -17   5    4.40    2.06
  -4  17  -5    4.15    2.25
  -5  17  -5   59.80    1.69
  -5  17  -5   60.86    2.67
  -6  17  -5   21.51    1.22
  -6  17  -5   20.38    2.09
  -7  17  -5    4.96    2.36
  -7  17  -5    5.27    1.16
  -8  17  -5   15.34    2.35
  -8  17  -5   16.50    1.36
  -9  17  -5    2.91    2.59
  -9  17  -5    3.06    1.39
 -10  17  -5   21.94    1.67
 -10  17  -5   20.28    2.65
 -11  17  -5    4.75    1.60
 -11  17  -5    3.30    2.83
 -12  17  -5    1.73    2.69
 -12  17  -5    3.46    1.44
 -13  17  -5    0.06    2.62
 -13  17  -5    1.12    1.51
 -14  17  -5    3.15    1.67
 -14  17  -5    1.77    3.01
 -15  17  -5    3.82    3.48
 -15  17  -5    1.74    1.69
 -16  17  -5    1.82    3.07
 -16  17  -5    0.86    1.93
 -17  17  -5    1.97    2.00
 -17  17  -5    0.18    3.56
   8  16  -5    1.99    4.22
  -8 -16   5    0.14    3.65
   7  16  -5    6.97    3.87
  -7 -16   5    4.86    3.27
   6  16  -5    1.82    3.60
  -6 -16   5    2.44    3.39
   5  16  -5   -0.05    3.22
  -5 -16   5   -0.11    3.09
   3  16  -5    5.12    2.96
  -3 -16   5    5.37    2.70
   2  16  -5   20.80    2.59
   2  16  -5   21.79    2.10
  -2 -16   5   21.47    2.61
   1  16  -5   -0.28    2.51
   1  16  -5    1.70    2.05
  -1 -16   5    0.60    2.25
   0  16  -5   29.25    2.25
   0  16  -5   26.70    2.62
   0 -16   5   29.24    2.28
  -1  16  -5   25.11    2.00
  -1  16  -5   24.60    2.35
   1 -16   5   26.13    2.10
  -2  16  -5    1.55    1.92
   2 -16   5    1.93    1.78
  -3  16  -5   10.51    1.88
   3 -16   5   11.48    1.70
  -4  16  -5   80.17    3.71
  -5  16  -5   36.57    2.21
  -5  16  -5   35.64    1.20
  -6  16  -5    2.48    1.08
  -6  16  -5    1.41    2.00
  -7  16  -5    0.62    1.12
  -8  16  -5    0.71    1.20
  -9  16  -5   26.66    1.54
 -10  16  -5    1.17    1.27
 -11  16  -5   12.64    2.34
 -11  16  -5   13.33    1.50
 -12  16  -5    2.49    2.71
 -12  16  -5    1.93    1.41
 -13  16  -5    2.46    2.47
 -13  16  -5    2.03    1.43
 -14  16  -5    0.61    2.61
 -14  16  -5    0.94    1.57
 -15  16  -5    1.35    3.00
 -15  16  -5    1.42    1.76
 -16  16  -5   -0.22    3.03
 -16  16  -5   -0.10    1.85
 -17  16  -5    7.86    2.17
 -17  16  -5    5.14    3.75
   9  15  -5   -0.13    4.13
  -9 -15   5    0.05    3.44
   8  15  -5    2.12    3.56
  -8 -15   5    2.15    3.16
   7  15  -5    2.25    3.52
  -7 -15   5    2.59    3.16
   6  15  -5    6.46    3.59
  -6 -15   5    3.44    2.88
   5  15  -5    5.25    3.13
  -5 -15   5    5.92    2.95
   4  15  -5   51.66    3.07
  -4 -15   5   55.27    3.09
   3  15  -5   11.14    2.93
  -3 -15   5    9.36    2.87
   2  15  -5    2.18    1.90
   2  15  -5    3.96    2.55
  -2 -15   5    1.13    2.23
   1  15  -5    5.08    1.75
   1  15  -5    6.21    2.33
  -1 -15   5    4.99    2.07
   0  15  -5    6.70    2.31
   0  15  -5    7.68    1.83
   0 -15   5    8.49    1.95
  -1  15  -5    1.74    2.17
  -1  15  -5    0.51    1.58
   1 -15   5    2.97    1.76
  -2  15  -5   22.02    1.85
   2 -15   5   19.91    1.70
  -3  15  -5   11.70    1.89
  -4  15  -5  123.71    4.70
  -4  15  -5  123.27    3.89
  -5  15  -5   10.75    1.12
  -5  15  -5   12.48    2.12
  -6  15  -5   13.16    1.94
  -6  15  -5   13.85    1.13
  -7  15  -5   20.91    1.46
  -8  15  -5   12.06    1.25
  -9  15  -5   15.38    1.38
 -10  15  -5   11.00    1.35
 -11  15  -5   12.01    2.49
 -11  15  -5   11.54    1.42
 -12  15  -5   13.35    2.90
 -12  15  -5   13.93    1.63
 -13  15  -5   25.56    2.19
 -13  15  -5   27.34    3.62
 -14  15  -5    2.18    1.62
 -14  15  -5    3.25    2.84
 -15  15  -5    1.90    1.77
 -15  15  -5    2.45    2.75
 -16  15  -5   -0.50    2.80
 -16  15  -5   -0.27    1.70
 -17  15  -5    2.43    3.24
 -17  15  -5    1.09    1.87
  10  14  -5   15.81    4.20
 -10 -14   5   12.85    3.56
   9  14  -5    5.98    3.72
  -9 -14   5    3.90    3.07
   8  14  -5    3.42    3.33
  -8 -14   5    1.90    2.92
   7  14  -5    6.32    3.18
  -7 -14   5    5.82    2.70
   5  14  -5   13.43    2.60
  -5 -14   5   12.86    2.57
   4  14  -5   44.48    2.54
  -4 -14   5   44.80    2.40
   3  14  -5   99.46    3.90
  -3 -14   5   94.91    3.26
   2  14  -5   13.20    1.65
   2  14  -5   13.20    2.09
  -2 -14   5   13.05    2.20
   1  14  -5   18.95    2.05
   1  14  -5   17.33    2.52
  -1 -14   5   17.90    2.19
   0  14  -5    3.97    1.95
   0  14  -5    2.89    1.61
   0 -14   5    1.44    1.75
  -1  14  -5   17.29    2.12
   1 -14   5   16.83    1.95
  -2  14  -5   19.17    1.76
  -3  14  -5   21.18    1.59
   3 -14   5   20.80    1.22
  -4  14  -5   22.10    2.08
  -4  14  -5   22.71    1.09
  -5  14  -5   73.47    2.26
  -5  14  -5   69.30    3.17
  -6  14  -5    5.05    0.92
  -7  14  -5   38.83    2.20
  -8  14  -5    0.81    0.93
  -9  14  -5   14.45    1.11
 -10  14  -5   23.45    1.76
 -11  14  -5    1.66    1.20
 -11  14  -5    0.66    2.21
 -12  14  -5   -0.11    1.24
 -12  14  -5    1.47    2.40
 -13  14  -5   26.64    1.99
 -13  14  -5   24.09    3.03
 -14  14  -5    8.50    1.80
 -14  14  -5    8.69    3.09
 -15  14  -5    5.95    1.61
 -15  14  -5    6.41    2.69
 -16  14  -5    1.77    1.74
 -16  14  -5    1.07    2.80
 -17  14  -5   13.08    1.94
 -17  14  -5   16.15    3.58
 -18  14  -5    3.61    2.08
 -18  14  -5    4.48    3.27
  11  13  -5    8.01    4.22
 -11 -13   5   10.14    3.16
  10  13  -5   19.96    3.77
 -10 -13   5   24.17    2.97
   9  13  -5    8.58    3.46
  -9 -13   5    7.24    2.66
   8  13  -5    6.49    3.02
  -8 -13   5    5.31    2.45
   7  13  -5   33.97    3.35
  -7 -13   5   32.03    2.75
   6  13  -5   31.46    2.87
  -6 -13   5   31.30    2.31
   5  13  -5   12.53    2.51
  -5 -13   5   15.06    2.44
   4  13  -5   -0.54    2.28
  -4 -13   5    0.60    2.15
   3  13  -5   -0.07    2.04
  -3 -13   5    0.65    2.20
   2  13  -5   11.92    2.11
  -2 -13   5   12.53    1.99
   1  13  -5   46.48    2.13
   1  13  -5   45.71    1.68
  -1 -13   5   44.33    1.90
   0  13  -5   60.00    2.38
   0 -13   5   60.24    2.13
  -1  13  -5   20.83    1.48
   1 -13   5   20.63    1.33
  -2  13  -5    9.06    1.40
   2 -13   5   10.01    1.28
  -3  13  -5    1.39    1.42
   3 -13   5    2.22    1.12
  -4  13  -5   47.93    2.43
  -4  13  -5   48.45    1.58
  -5  13  -5    3.66    1.68
  -5  13  -5    2.22    0.78
  -6  13  -5   52.84    1.44
  -7  13  -5    1.56    0.83
  -8  13  -5   46.06    1.59
  -9  13  -5   43.78    1.84
 -10  13  -5   61.84    3.17
 -10  13  -5   62.96    4.19
 -11  13  -5   31.96    2.60
 -11  13  -5   33.22    1.49
 -12  13  -5    2.82    1.19
 -12  13  -5    4.48    2.40
 -13  13  -5    9.31    2.36
 -14  13  -5    9.07    1.56
 -14  13  -5    8.69    2.51
 -15  13  -5   22.69    3.00
 -15  13  -5   20.93    2.04
 -16  13  -5    0.05    2.56
 -16  13  -5    1.40    1.63
 -17  13  -5    0.72    1.83
 -17  13  -5    2.29    3.22
 -18  13  -5    4.13    3.41
  12  12  -5    4.30    4.53
 -12 -12   5    1.38    3.14
  11  12  -5    3.14    3.95
 -11 -12   5   -0.43    2.78
  10  12  -5   20.59    3.55
 -10 -12   5   20.93    2.70
   9  12  -5    2.78    3.09
  -9 -12   5    3.09    2.54
   8  12  -5   56.22    3.44
  -8 -12   5   61.75    3.02
   7  12  -5   24.76    2.88
  -7 -12   5   24.74    2.00
   6  12  -5   34.05    2.55
  -6 -12   5   32.61    2.09
   5  12  -5    6.78    2.32
  -5 -12   5    4.37    2.00
   4  12  -5    9.37    2.32
  -4 -12   5    7.29    1.90
   3  12  -5   11.99    1.98
  -3 -12   5   11.29    1.79
   2  12  -5   81.12    2.25
   2  12  -5   81.28    1.85
  -2 -12   5   79.38    2.02
   1  12  -5   32.73    1.95
   1  12  -5   33.98    1.57
  -1 -12   5   32.59    1.70
   0  12  -5    9.71    1.60
   0  12  -5   10.39    1.26
   0 -12   5   11.04    1.36
  -1  12  -5   14.85    1.71
   1 -12   5   15.05    1.51
  -2  12  -5    7.43    1.51
   2 -12   5    8.33    1.25
  -3  12  -5   15.15    1.41
  -4  12  -5   14.40    1.68
  -4  12  -5   12.37    0.95
  -5  12  -5   16.05    1.61
  -5  12  -5   14.36    0.81
  -6  12  -5  108.14    3.29
  -7  12  -5    8.74    0.75
  -8  12  -5    4.01    0.91
  -9  12  -5  109.01    5.13
  -9  12  -5  110.25    4.40
 -10  12  -5    3.77    1.97
 -10  12  -5    2.48    1.13
 -11  12  -5   75.07    4.06
 -11  12  -5   72.10    3.05
 -12  12  -5   66.42    2.81
 -12  12  -5   67.41    3.88
 -13  12  -5    4.15    2.49
 -13  12  -5    2.80    1.32
 -14  12  -5    1.05    2.19
 -14  12  -5    2.04    1.45
 -15  12  -5   28.47    2.79
 -15  12  -5   30.21    2.06
 -16  12  -5    4.72    1.77
 -16  12  -5    3.77    2.93
 -17  12  -5   -0.47    1.80
 -17  12  -5    2.79    2.91
 -18  12  -5    7.45    3.20
 -18  12  -5    5.56    2.37
 -12 -11   5   -0.64    2.58
  11  11  -5   11.46    3.67
  10  11  -5    2.69    3.15
 -10 -11   5    2.92    2.28
   9  11  -5    1.00    2.88
  -9 -11   5    2.71    2.29
   8  11  -5    2.58    2.74
  -8 -11   5    2.71    2.00
   7  11  -5   10.49    2.49
  -7 -11   5   10.66    1.81
   6  11  -5   12.59    2.29
  -6 -11   5   12.16    1.61
   5  11  -5  132.73    3.97
  -5 -11   5  132.33    3.42
   4  11  -5    0.52    1.93
  -4 -11   5    0.63    1.51
   3  11  -5  244.87    4.30
  -3 -11   5  252.07    4.17
   2  11  -5   14.96    1.76
   2  11  -5   14.12    1.23
  -2 -11   5   13.99    1.45
   1  11  -5    0.89    1.19
   1  11  -5    0.77    1.44
  -1 -11   5    0.66    1.39
   0  11  -5    9.14    1.21
   1 -11   5  148.53    4.58
  -2  11  -5   42.00    1.48
  -2  11  -5   42.12    1.24
  -3  11  -5   25.11    1.80
  -3  11  -5   24.79    1.26
  -3  11  -5   24.85    1.99
  -4  11  -5    5.76    0.95
  -4  11  -5    6.40    1.21
  -4  11  -5    6.79    0.63
  -5  11  -5   96.52    2.29
  -5  11  -5   94.76    2.92
  -6  11  -5    3.79    1.48
  -6  11  -5    3.20    0.76
  -7  11  -5   33.40    1.85
  -8  11  -5   -0.12    0.75
  -8  11  -5    0.59    1.53
  -9  11  -5    8.19    1.31
  -9  11  -5    7.41    2.16
 -10  11  -5    2.19    1.02
 -10  11  -5    1.85    1.74
 -11  11  -5  101.22    4.14
 -11  11  -5  104.04    3.35
 -12  11  -5   58.24    3.39
 -12  11  -5   58.63    4.25
 -13  11  -5   21.21    1.82
 -13  11  -5   22.96    2.78
 -14  11  -5    4.17    1.57
 -14  11  -5    3.67    2.58
 -15  11  -5    0.77    1.48
 -15  11  -5    1.56    2.48
 -16  11  -5    1.91    1.54
 -16  11  -5    2.83    2.59
 -17  11  -5    4.73    2.80
 -17  11  -5    5.76    2.19
 -18  11  -5   15.75    2.88
 -18  11  -5   14.51    3.59
  13  10  -5    8.55    4.50
 -13 -10   5    5.19    2.77
  12  10  -5   -0.20    3.72
 -12 -10   5    0.98    2.53
  11  10  -5   28.58    3.40
 -11 -10   5   29.06    2.23
  10  10  -5   20.67    3.26
 -10 -10   5   24.21    2.28
   9  10  -5   15.97    2.78
  -9 -10   5   17.67    1.79
   8  10  -5    2.36    2.41
   7  10  -5    3.44    2.45
  -7 -10   5    1.32    1.62
   6  10  -5   14.89    2.21
  -6 -10   5   16.28    1.52
   5  10  -5    9.59    2.16
  -5 -10   5   10.58    1.58
   4  10  -5   39.50    1.99
  -4 -10   5   39.60    1.36
   3  10  -5   15.35    1.85
  -3 -10   5   17.18    1.60
   2  10  -5  121.22    4.48
   2  10  -5  122.98    4.82
  -2 -10   5  120.32    4.60
   1  10  -5    7.20    1.50
   1  10  -5    7.23    1.14
  -1 -10   5    5.88    1.32
   0  10  -5    8.34    1.16
   0  10  -5    7.52    0.77
  -1  10  -5   79.05    3.19
  -1  10  -5   77.41    2.95
   1 -10   5   79.62    3.02
  -2  10  -5   14.29    0.97
   2 -10   5   14.20    0.85
  -3  10  -5  208.59    4.51
  -3  10  -5  205.71    4.91
  -4  10  -5   54.13    2.17
  -5  10  -5  153.53    4.35
  -5  10  -5  152.77    4.82
  -7  10  -5   18.51    1.51
  -7  10  -5   17.86    0.95
  -8  10  -5   15.52    0.97
  -8  10  -5   13.63    1.74
  -9  10  -5    6.06    1.86
  -9  10  -5    7.67    1.14
 -10  10  -5   -0.18    0.90
 -10  10  -5    0.58    1.50
 -11  10  -5    7.55    2.09
 -11  10  -5    6.92    1.34
 -12  10  -5   60.78    3.57
 -12  10  -5   60.75    2.79
 -13  10  -5   50.23    3.03
 -13  10  -5   51.42    2.37
 -14  10  -5   21.48    2.69
 -14  10  -5   22.35    1.80
 -15  10  -5   10.00    1.55
 -15  10  -5    9.84    2.24
 -16  10  -5    9.80    2.86
 -16  10  -5   11.14    2.22
 -17  10  -5   11.14    2.49
 -17  10  -5    7.99    2.98
 -18  10  -5    4.89    3.01
 -18  10  -5    0.60    2.29
  14   9  -5    2.21    4.43
 -14  -9   5    0.38    2.67
  13   9  -5   -0.78    4.04
 -13  -9   5    1.44    2.48
  12   9  -5    5.28    3.51
 -12  -9   5    6.92    2.30
  11   9  -5    1.64    3.14
 -11  -9   5    1.02    1.96
  10   9  -5    1.51    2.71
 -10  -9   5    3.60    1.79
   9   9  -5   12.77    2.55
  -9  -9   5   12.09    1.68
   8   9  -5   23.26    2.24
  -8  -9   5   23.46    1.57
  -7  -9   5   88.84    3.07
   6   9  -5   13.93    2.24
   5   9  -5   81.05    3.29
  -5  -9   5   78.68    2.49
   4   9  -5   17.09    1.98
  -4  -9   5   15.06    1.42
   3   9  -5   36.09    2.68
  -3  -9   5   34.03    2.28
   2   9  -5  269.43    6.63
   2   9  -5  268.45    6.87
  -2  -9   5  271.11    6.68
   1   9  -5   28.48    0.56
   1   9  -5   28.79    1.25
  -1  -9   5   28.56    1.11
   0   9  -5   52.95    2.03
   0   9  -5   54.10    1.67
   0  -9   5   54.56    1.98
  -1   9  -5  304.77    8.47
  -1   9  -5  303.69    8.29
   1  -9   5  307.04    8.30
  -2   9  -5   20.29    0.88
  -2   9  -5   20.61    1.07
  -3   9  -5  472.55   12.35
  -3   9  -5  473.07   12.43
  -3   9  -5  472.96   12.65
  -4   9  -5    3.65    0.64
  -4   9  -5    4.03    1.31
  -5   9  -5  145.78    3.65
  -6   9  -5   14.75    1.66
  -6   9  -5   15.71    1.14
  -7   9  -5   88.08    2.39
  -7   9  -5   84.12    2.93
  -8   9  -5  142.22    4.33
  -9   9  -5   50.29    3.03
  -9   9  -5   52.73    2.39
 -10   9  -5   96.67    3.40
 -10   9  -5   94.54    2.77
 -11   9  -5   21.57    1.85
 -11   9  -5   22.21    1.21
 -12   9  -5    2.53    1.08
 -12   9  -5    1.71    1.69
 -13   9  -5   16.43    1.36
 -13   9  -5   17.03    2.10
 -14   9  -5   20.40    1.65
 -14   9  -5   21.24    2.39
 -15   9  -5   16.54    2.74
 -15   9  -5   17.11    2.10
 -16   9  -5    9.75    2.66
 -16   9  -5    9.81    2.03
 -17   9  -5    1.36    2.60
 -17   9  -5    3.92    2.18
 -18   9  -5    0.47    2.29
 -18   9  -5    1.34    2.89
  14   8  -5    9.22    4.15
 -14  -8   5    6.33    2.38
  13   8  -5    3.69    3.90
 -13  -8   5    1.26    2.26
  12   8  -5   -0.84    3.31
 -12  -8   5    1.53    2.11
  11   8  -5    4.21    3.10
 -11  -8   5    3.62    1.90
  10   8  -5   -0.41    2.60
 -10  -8   5    2.43    1.64
   9   8  -5    4.05    2.51
  -9  -8   5    4.82    1.59
   8   8  -5    7.59    2.32
  -8  -8   5    8.62    1.50
   7   8  -5   16.29    2.49
   6   8  -5   77.25    3.43
  -6  -8   5   79.58    2.65
  -5  -8   5  149.80    2.94
  -4  -8   5   32.42    1.18
   3   8  -5  141.56    3.30
  -3  -8   5  143.79    3.12
   2   8  -5    7.90    1.65
   2   8  -5    7.37    1.51
   2   8  -5    6.10    1.03
  -2  -8   5    8.41    1.30
   1   8  -5    4.50    0.92
   1   8  -5    4.59    0.53
  -1  -8   5    4.98    0.99
   0   8  -5  285.84    5.14
   0   8  -5  282.56    4.90
   0  -8   5  285.24    5.03
  -1   8  -5   17.69    1.45
  -1   8  -5   19.19    1.16
   1  -8   5   18.47    1.15
  -2   8  -5   39.35    2.14
  -2   8  -5   36.98    2.54
  -2   8  -5   37.30    2.30
  -3   8  -5  525.01   10.26
  -4   8  -5    1.42    0.44
  -4   8  -5    0.99    0.91
  -5   8  -5   16.35    0.79
   5  -8   5   16.11    0.81
  -7   8  -5  184.31    5.61
  -7   8  -5  181.72    6.00
  -8   8  -5  278.73    8.72
  -8   8  -5  268.88    8.34
  -9   8  -5    3.26    0.96
  -9   8  -5    2.00    1.34
 -10   8  -5    6.16    1.43
 -10   8  -5    5.59    0.83
 -11   8  -5    9.95    1.72
 -11   8  -5    9.01    1.14
 -12   8  -5   22.72    1.81
 -12   8  -5   22.15    1.23
 -13   8  -5   25.39    3.17
 -13   8  -5   24.27    2.49
 -14   8  -5   52.12    4.06
 -14   8  -5   51.09    3.42
 -15   8  -5   14.41    2.46
 -15   8  -5   14.38    1.73
 -16   8  -5    4.52    2.56
 -16   8  -5    4.57    2.00
 -17   8  -5    6.19    2.88
 -17   8  -5    4.78    2.29
 -18   8  -5    2.40    3.01
 -18   8  -5    3.58    2.47
  15   7  -5   39.25    4.44
 -15  -7   5   38.83    3.03
  14   7  -5    1.19    3.71
 -14  -7   5    3.17    2.34
  13   7  -5    1.95    3.30
 -13  -7   5    5.37    2.14
  12   7  -5   16.01    3.12
  11   7  -5   19.25    2.93
  10   7  -5    1.78    2.68
 -10  -7   5    1.02    1.39
   9   7  -5    1.18    2.23
  -9  -7   5   -0.08    1.26
   8   7  -5    6.15    2.09
  -8  -7   5    4.96    1.12
   7   7  -5   59.62    3.26
  -7  -7   5   59.95    2.30
   6   7  -5   23.04    1.96
   3   7  -5  205.08    3.94
  -3  -7   5  209.21    4.03
  -3  -7   5  210.17    4.04
   2   7  -5   38.38    1.84
   2   7  -5   39.72    2.14
   2   7  -5   37.93    1.42
  -2  -7   5   38.59    1.65
  -2  -7   5   38.64    1.67
   1   7  -5  357.75    8.19
   1   7  -5  357.76    8.39
  -1  -7   5  353.19    8.29
   0   7  -5  122.99    4.06
   0   7  -5  128.63    4.33
   0  -7   5  127.40    4.17
  -1   7  -5    1.36    0.73
  -1   7  -5    1.28    0.50
   1  -7   5    1.21    0.45
  -2   7  -5   37.85    0.75
  -2   7  -5   38.91    0.66
  -2   7  -5   38.45    1.21
  -3   7  -5   55.12    0.90
  -3   7  -5   54.75    1.39
  -4   7  -5   80.34    2.31
  -4   7  -5   81.47    2.73
   4  -7   5   80.37    2.29
  -5   7  -5  373.84   10.89
  -5   7  -5  378.59   10.63
   5  -7   5  377.06   10.62
  -6   7  -5  343.10    8.79
  -7   7  -5   10.27    0.85
  -7   7  -5    8.71    1.18
  -8   7  -5  262.93    7.58
  -8   7  -5  264.97    7.92
  -9   7  -5  182.39    5.32
  -9   7  -5  182.90    4.94
 -10   7  -5    2.68    0.91
 -10   7  -5    2.57    1.37
 -11   7  -5   32.49    1.22
 -11   7  -5   33.39    1.80
 -12   7  -5   -0.05    1.12
 -12   7  -5    0.41    1.66
 -13   7  -5   31.33    2.60
 -13   7  -5   34.74    2.36
 -14   7  -5   55.45    2.04
 -14   7  -5   54.70    2.61
 -15   7  -5    0.56    1.64
 -15   7  -5    0.34    2.13
 -16   7  -5    2.67    1.87
 -16   7  -5    2.20    2.35
 -17   7  -5   18.50    2.59
 -17   7  -5   21.11    3.26
 -18   7  -5    2.49    3.17
 -18   7  -5    2.20    2.46
  15   6  -5   13.01    4.12
 -15  -6   5   16.02    2.53
  14   6  -5    4.00    3.60
 -14  -6   5    2.46    2.14
  13   6  -5    5.49    3.17
 -13  -6   5    6.32    1.91
  12   6  -5   28.93    3.74
 -12  -6   5   27.31    2.15
  11   6  -5   15.32    3.12
 -11  -6   5   15.73    1.68
  10   6  -5   -0.36    2.40
 -10  -6   5    0.86    1.28
   9   6  -5    1.48    2.14
  -9  -6   5    0.78    1.11
  -8  -6   5   53.25    1.35
   7   6  -5   21.04    1.80
  -7  -6   5   19.31    0.93
   6   6  -5   43.46    3.13
  -6  -6   5   40.63    2.27
   4   6  -5   66.15    2.59
  -4  -6   5   69.76    2.01
   3   6  -5  188.42    5.08
   3   6  -5  193.43    4.72
  -3  -6   5  196.01    4.83
  -3  -6   5  192.46    4.76
   2   6  -5   55.54    0.92
   2   6  -5   54.77    1.38
  -2  -6   5   54.64    1.05
  -2  -6   5   54.46    1.22
   1   6  -5   25.52    0.60
   1   6  -5   26.76    1.02
  -1  -6   5   26.31    0.75
  -1  -6   5   26.49    1.01
   0   6  -5  402.39    9.34
   0   6  -5  399.41    9.55
   0  -6   5  397.69    9.39
   0  -6   5  410.36    9.54
  -1   6  -5  402.28    9.50
   1  -6   5  406.45    9.49
  -2   6  -5   82.64    3.36
  -2   6  -5   82.65    3.64
  -2   6  -5   86.57    3.34
   2  -6   5   85.15    3.63
  -3   6  -5   78.57    2.31
  -3   6  -5   78.83    1.94
   3  -6   5   79.23    1.93
   4  -6   5    8.31    0.45
  -5   6  -5    1.94    0.99
  -5   6  -5    1.78    0.52
   5  -6   5    2.13    0.51
  -7   6  -5    1.51    0.62
  -7   6  -5    1.77    1.06
  -8   6  -5   70.21    1.92
  -8   6  -5   71.54    2.38
  -9   6  -5   67.08    2.33
  -9   6  -5   63.65    2.76
 -10   6  -5  108.65    3.07
 -10   6  -5  113.87    2.74
 -11   6  -5    1.60    1.50
 -11   6  -5    2.55    1.00
 -12   6  -5    0.42    1.71
 -12   6  -5    0.56    1.12
 -13   6  -5    6.24    1.58
 -13   6  -5    6.37    2.11
 -14   6  -5    0.78    1.47
 -14   6  -5    1.45    2.04
 -15   6  -5    0.98    2.25
 -15   6  -5    2.12    1.77
 -16   6  -5    5.17    1.99
 -16   6  -5    3.27    2.48
 -17   6  -5    7.28    2.49
 -17   6  -5   10.17    3.07
 -18   6  -5    4.62    2.58
 -18   6  -5    1.43    3.27
 -16  -5   5    9.61    2.42
 -15  -5   5   10.65    2.11
  14   5  -5   13.68    3.55
 -14  -5   5   15.87    2.18
  13   5  -5    7.87    3.35
 -13  -5   5    5.71    1.72
  12   5  -5    3.87    2.98
 -12  -5   5    3.22    1.59
  11   5  -5   -0.05    2.53
 -11  -5   5    1.56    1.39
  10   5  -5    3.98    2.41
 -10  -5   5    3.91    1.23
   9   5  -5   41.94    2.40
  -9  -5   5   42.30    1.44
   8   5  -5  102.74    3.75
  -8  -5   5  107.16    2.98
  -7  -5   5   32.64    1.29
   6   5  -5   31.72    2.79
  -6  -5   5   34.86    2.04
   5   5  -5  134.08    4.98
  -5  -5   5  134.25    4.55
   4   5  -5  853.09   19.35
  -4  -5   5  852.07   19.34
  -4  -5   5  870.08   19.42
   3   5  -5  489.54    9.09
  -3  -5   5  486.23    9.09
  -3  -5   5  486.34    9.19
   2   5  -5   20.25    1.01
   2   5  -5   20.74    0.48
  -2  -5   5   20.77    0.54
  -2  -5   5   20.72    0.78
   1   5  -5   53.54    3.48
   1   5  -5   49.55    3.17
  -1  -5   5   53.96    3.40
  -1  -5   5   51.16    3.20
   0   5  -5   47.03    1.31
   0  -5   5   47.90    1.24
  -1   5  -5   69.13    1.30
   1  -5   5   70.09    1.24
  -2   5  -5  103.29    3.42
  -2   5  -5  104.48    3.14
   2  -5   5  107.96    3.41
   2  -5   5  105.44    3.14
  -3   5  -5  165.86    2.23
  -3   5  -5  164.56    2.56
   3  -5   5  167.76    2.53
   3  -5   5  165.84    2.22
  -4   5  -5  827.07   27.96
  -4   5  -5  826.07   28.17
   4  -5   5  829.54   27.96
  -5   5  -5    4.79    0.61
   5  -5   5    4.05    0.56
  -6   5  -5  228.84    7.12
  -6   5  -5  227.45    7.36
  -7   5  -5  100.45    3.36
  -7   5  -5  103.85    3.06
  -8   5  -5   84.59    3.76
  -8   5  -5   86.64    3.47
  -9   5  -5   17.91    1.01
  -9   5  -5   16.93    1.41
 -10   5  -5    1.98    1.53
 -10   5  -5    3.48    1.12
 -11   5  -5   35.38    2.29
 -11   5  -5   32.72    2.72
 -12   5  -5    1.44    1.17
 -12   5  -5    1.33    1.79
 -13   5  -5    3.53    1.35
 -13   5  -5    3.20    1.82
 -14   5  -5    1.05    1.57
 -14   5  -5    0.16    1.91
 -15   5  -5    0.14    2.45
 -15   5  -5    0.22    1.78
 -16   5  -5    1.43    2.00
 -16   5  -5    2.12    2.65
 -17   5  -5    3.73    2.97
 -17   5  -5   -0.06    2.16
 -16  -4   5    0.45    2.39
 -15  -4   5    0.55    2.14
  14   4  -5   12.38    3.54
 -14  -4   5   16.30    2.19
  13   4  -5    4.74    2.82
 -13  -4   5    5.17    1.60
  12   4  -5   12.14    2.76
 -12  -4   5   12.08    1.48
  11   4  -5    3.33    2.58
 -11  -4   5    3.15    1.28
 -10  -4   5   36.72    2.41
  -9  -4   5  149.75    3.73
   8   4  -5   59.14    2.20
  -8  -4   5   59.61    1.51
   7   4  -5   83.91    2.13
  -7  -4   5   84.30    1.52
   6   4  -5    4.97    1.36
  -6  -4   5    4.61    0.64
   5   4  -5  279.33    5.04
  -5  -4   5  280.49    4.71
   4   4  -5  712.57   16.87
   4   4  -5  714.28   17.15
  -4  -4   5  702.63   17.00
  -4  -4   5  708.82   16.86
  -3  -4   5  136.40    4.55
  -3  -4   5  135.86    4.35
   2   4  -5   87.61    0.98
   2   4  -5   86.46    1.47
  -2  -4   5   87.71    1.32
  -2  -4   5   87.31    0.98
  -1  -4   5   10.62    1.21
   0   4  -5  165.51    7.89
   0  -4   5  162.84    7.84
  -1   4  -5  104.02    3.75
   1  -4   5  103.76    3.72
  -2   4  -5   20.42    1.76
  -2   4  -5   19.15    1.35
  -3   4  -5    3.30    0.73
  -3   4  -5    3.04    0.34
   3  -4   5    2.63    0.31
   3  -4   5    3.02    0.64
  -4   4  -5  528.98   15.55
  -4   4  -5  531.82   15.35
   4  -4   5  525.78   15.52
   4  -4   5  527.89   15.35
  -5   4  -5   20.93    1.41
  -5   4  -5   21.24    0.96
   5  -4   5   21.22    0.93
  -6   4  -5   16.04    1.24
  -6   4  -5   15.57    1.68
  -7   4  -5  106.54    3.75
  -7   4  -5  101.32    3.41
  -8   4  -5   58.79    2.30
  -8   4  -5   58.43    1.90
  -9   4  -5   64.09    2.10
  -9   4  -5   65.28    2.51
 -10   4  -5   20.02    1.45
 -10   4  -5   20.25    1.89
 -11   4  -5   54.57    2.21
 -11   4  -5   52.12    2.68
 -12   4  -5   10.56    1.67
 -12   4  -5   10.13    1.24
 -13   4  -5   10.95    2.22
 -13   4  -5   12.46    1.65
 -14   4  -5   37.76    2.48
 -14   4  -5   37.47    1.90
 -15   4  -5   19.39    1.95
 -15   4  -5   21.50    2.54
 -16   4  -5   12.17    3.05
 -16   4  -5   11.62    2.25
 -17   4  -5    3.32    2.53
 -17  -3   5   16.05    2.68
 -16  -3   5   -0.52    2.08
 -15  -3   5    2.77    2.15
 -14  -3   5   17.88    1.86
 -13  -3   5   46.63    2.08
  12   3  -5   21.35    3.04
 -12  -3   5   22.61    1.80
  11   3  -5   25.40    2.50
 -11  -3   5   25.58    1.23
  10   3  -5   18.96    2.49
 -10  -3   5   21.28    1.81
   9   3  -5   38.76    1.90
  -9  -3   5   37.93    0.96
   8   3  -5   12.60    1.63
  -8  -3   5   13.77    0.91
   7   3  -5   48.97    2.65
   7   3  -5   46.21    2.17
  -7  -3   5   46.27    1.85
   6   3  -5  925.03   19.91
   6   3  -5  942.98   20.05
  -6  -3   5  911.49   19.74
   5   3  -5  182.41    5.60
   5   3  -5  179.78    5.62
   5   3  -5  185.36    5.29
  -5  -3   5  183.75    5.28
   4   3  -5   84.67    3.17
  -4  -3   5   84.20    2.58
   3   3  -5   49.29    1.41
   3   3  -5   48.97    2.13
  -3  -3   5   48.83    1.41
  -3  -3   5   51.39    1.77
   2   3  -5   68.03    1.90
  -2  -3   5   69.35    1.91
  -2  -3   5   71.46    2.30
   1   3  -5  435.99    5.72
   0   3  -5  226.68    6.18
   0  -3   5  229.94    6.11
  -1   3  -5   79.76    2.43
   1  -3   5   81.62    2.39
  -2   3  -5  145.64    2.58
  -2   3  -5  144.72    2.25
   2  -3   5  145.56    2.51
   2  -3   5  143.41    2.24
  -3   3  -5  103.11    1.56
  -3   3  -5  104.69    1.92
   3  -3   5  102.78    1.54
   3  -3   5  103.27    1.81
  -4   3  -5    9.81    0.67
  -4   3  -5   11.34    1.25
   4  -3   5   10.78    0.93
   4  -3   5    9.99    0.65
  -5   3  -5    3.67    0.58
  -5   3  -5    3.87    0.93
   5  -3   5    3.31    0.55
   5  -3   5    3.96    0.85
  -6   3  -5  231.41    5.72
  -6   3  -5  227.01    5.48
  -7   3  -5  296.85    9.73
  -7   3  -5  301.03    9.93
  -8   3  -5    1.64    1.20
  -8   3  -5    1.46    0.88
  -9   3  -5   50.50    2.71
  -9   3  -5   50.83    3.04
 -10   3  -5   12.33    1.11
 -10   3  -5   12.56    1.53
 -11   3  -5   14.29    1.61
 -11   3  -5   15.16    1.25
 -12   3  -5   15.19    1.60
 -12   3  -5   16.68    2.18
 -13   3  -5   33.36    1.73
 -13   3  -5   33.68    2.17
 -14   3  -5    4.30    1.83
 -14   3  -5    3.14    2.49
 -15   3  -5   12.49    2.12
 -15   3  -5   14.55    2.86
 -16   3  -5    3.54    2.95
 -16   3  -5    5.26    2.19
 -17   3  -5    7.99    2.64
 -17  -2   5    0.48    2.32
 -16  -2   5    2.81    2.19
 -15  -2   5    1.17    1.89
 -14  -2   5  145.77    4.05
  13   2  -5    3.34    2.78
 -13  -2   5    2.51    1.41
  12   2  -5    3.61    2.51
 -12  -2   5    7.26    1.40
  11   2  -5   37.57    2.94
 -11  -2   5   41.27    2.17
 -11  -2   5   37.48    3.22
 -10  -2   5   81.81    2.63
 -10  -2   5   81.52    1.34
   9   2  -5  197.21    6.82
  -9  -2   5  196.81    6.24
  -8  -2   5   13.56    1.76
  -8  -2   5   12.51    0.73
   7   2  -5    5.98    1.43
   6   2  -5  569.60   14.99
   6   2  -5  574.38   14.96
  -6  -2   5  576.18   14.75
   5   2  -5   29.88    0.56
   5   2  -5   29.46    1.05
   5   2  -5   28.93    1.11
  -5  -2   5   29.92    0.57
  -5  -2   5   28.98    1.31
   4   2  -5  111.93    0.99
  -4  -2   5  111.29    1.01
   3   2  -5  285.29    8.04
  -3  -2   5  285.19    7.77
   2   2  -5  885.09   31.06
   2   2  -5  909.09   31.20
  -2  -2   5  880.00   31.06
  -1  -2   5    7.36    0.69
  -1  -2   5    7.19    0.75
   0   2  -5  185.04    3.88
   0  -2   5  182.46    3.89
  -1   2  -5  352.09    9.81
  -1   2  -5  357.43   10.08
   1  -2   5  355.42   10.00
   1  -2   5  357.96    9.80
  -2   2  -5  554.75   14.59
  -2   2  -5  538.52   14.36
   2  -2   5  552.01   14.55
   2  -2   5  541.13   14.36
  -3   2  -5  144.04    5.91
  -3   2  -5  149.30    6.15
   3  -2   5  144.09    5.90
   3  -2   5  146.69    6.08
  -4   2  -5   51.82    2.13
  -4   2  -5   54.35    1.82
   4  -2   5   52.72    1.78
   4  -2   5   52.22    2.01
  -5   2  -5    9.86    1.23
  -5   2  -5    8.63    0.86
   5  -2   5    9.79    1.11
  -6   2  -5  171.32    4.24
  -6   2  -5  168.48    4.47
  -7   2  -5   77.98    1.51
  -7   2  -5   76.10    1.91
  -8   2  -5    0.64    1.22
  -8   2  -5    1.30    0.83
  -9   2  -5   29.14    1.70
 -10   2  -5  240.39    5.06
 -10   2  -5  240.14    5.36
 -11   2  -5    4.34    1.31
 -11   2  -5    3.95    1.75
 -12   2  -5    1.32    1.52
 -12   2  -5    1.76    1.92
 -13   2  -5   54.07    4.07
 -13   2  -5   50.23    3.40
 -14   2  -5    0.75    1.71
 -14   2  -5    2.89    2.47
 -15   2  -5    4.16    3.01
 -16   2  -5    2.85    2.26
 -17   2  -5    1.01    2.58
 -18  -1   5    3.61    2.91
 -17  -1   5    4.85    2.30
 -16  -1   5   15.28    2.20
 -15  -1   5   16.17    1.76
 -14  -1   5   27.35    1.84
 -13  -1   5    2.13    1.41
  12   1  -5    3.13    2.36
 -12  -1   5    1.77    1.17
 -11  -1   5  108.22    3.14
  10   1  -5   67.78    3.50
 -10  -1   5   67.70    2.58
   9   1  -5   59.89    3.45
  -9  -1   5   56.33    3.67
  -9  -1   5   61.16    2.52
   8   1  -5   11.13    2.07
  -8  -1   5    7.87    2.10
  -8  -1   5    9.92    1.37
   7   1  -5   18.35    1.66
   7   1  -5   18.63    1.77
  -7  -1   5   18.81    1.93
   6   1  -5  174.81    2.79
   6   1  -5  174.54    2.76
  -6  -1   5  174.68    2.30
  -6  -1   5  172.18    2.98
   5   1  -5  104.47    2.62
   5   1  -5  104.40    2.26
   5   1  -5  106.24    2.83
  -5  -1   5  104.18    2.95
  -5  -1   5  105.82    2.29
  -5  -1   5  102.75    2.49
   4   1  -5   71.25    4.08
   4   1  -5   74.78    3.83
   4   1  -5   70.59    3.58
  -4  -1   5   70.69    3.73
  -4  -1   5   72.51    3.60
  -4  -1   5   71.42    4.05
   3   1  -5 1413.09   37.45
   3   1  -5 1447.25   37.36
   3   1  -5 1421.27   37.68
  -3  -1   5 1415.91   37.44
  -3  -1   5 1419.58   37.36
   2   1  -5   10.59    1.17
   2   1  -5    9.14    0.93
  -2  -1   5   10.51    1.12
   1   1  -5    4.26    0.96
   1   1  -5    4.60    0.38
  -1  -1   5    4.70    0.41
   0  -1   5  151.23    1.85
  -1   1  -5   42.91    0.49
   1  -1   5   42.94    0.40
   1  -1   5   43.69    0.83
  -2   1  -5    9.56    1.05
  -2   1  -5   10.96    1.54
   2  -1   5   11.26    1.01
  -3   1  -5   72.81    1.84
  -3   1  -5   74.53    1.43
   3  -1   5   74.91    1.39
   3  -1   5   75.03    1.66
  -4   1  -5    5.97    1.01
  -4   1  -5    6.29    0.62
   4  -1   5    6.68    0.83
   4  -1   5    6.43    0.63
  -5   1  -5   13.28    1.13
  -5   1  -5   14.59    1.62
   5  -1   5   12.95    1.26
  -6   1  -5    7.02    1.08
  -6   1  -5    6.76    0.69
   6  -1   5    6.95    0.83
  -7   1  -5   82.88    2.83
  -7   1  -5   81.87    2.49
  -8   1  -5  116.19    2.80
  -8   1  -5  116.13    3.17
  -9   1  -5  368.86    9.20
  -9   1  -5  355.98    8.93
 -10   1  -5    5.68    1.77
 -10   1  -5    7.32    1.32
 -11   1  -5    3.16    1.44
 -12   1  -5    9.65    2.33
 -12   1  -5    7.75    1.66
 -13   1  -5   82.24    4.22
 -13   1  -5   76.65    3.34
 -14   1  -5    2.01    1.75
 -14   1  -5    3.05    3.05
 -15   1  -5   -0.49    2.06
 -16   1  -5   11.39    2.64
 -18   0   5    4.21    2.68
 -17   0   5    2.62    2.23
 -16   0   5   40.04    3.49
 -15   0   5    2.50    1.69
 -14   0   5   25.50    1.61
 -13   0   5    4.98    1.38
 -12   0   5   34.43    2.21
  11   0  -5    9.47    2.05
 -11   0   5    9.06    1.03
  10   0  -5   67.52    2.45
 -10   0   5   65.55    1.74
  -9   0   5   54.35    1.88
   8   0  -5  121.94    4.05
  -8   0   5  124.38    3.48
   7   0  -5   44.03    1.62
  -7   0   5   43.69    1.03
  -7   0   5   42.21    1.80
   6   0  -5   28.53    1.34
   6   0  -5   30.36    1.51
  -6   0   5   29.77    1.00
  -6   0   5   29.44    1.61
   5   0  -5   88.26    1.90
   5   0  -5   86.68    2.20
   5   0  -5   86.84    1.51
  -5   0   5   88.23    1.80
  -5   0   5   86.15    1.52
  -5   0   5   88.50    2.32
   4   0  -5  113.05    3.25
   4   0  -5  114.02    2.70
  -4   0   5  110.79    3.23
  -4   0   5  113.66    2.72
   3   0  -5   19.88    1.05
   3   0  -5   19.89    0.78
  -3   0   5   18.89    0.78
  -3   0   5   19.44    0.92
  -3   0   5   20.78    1.47
   2   0  -5  326.02    8.14
  -2   0   5  331.15    8.10
  -2   0   5  334.80    8.15
  -2   0   5  327.31    8.13
   1   0  -5  686.85   24.26
  -1   0   5  703.60   24.28
   0   0  -5   11.07    0.54
   0   0   5   11.51    0.53
   1   0   5 1208.07   29.26
  -2   0  -5  437.89    7.54
   2   0   5  442.64    7.52
   2   0   5  443.03    7.72
  -3   0  -5    9.39    0.63
   3   0   5    9.04    0.56
   3   0   5    8.73    0.80
  -4   0  -5   81.33    2.56
  -4   0  -5   83.55    2.78
   4   0   5   83.95    2.68
  -5   0  -5  105.02    2.87
   5   0   5  104.66    2.95
  -6   0  -5   91.66    2.53
   6   0   5   90.08    2.54
  -7   0  -5   16.98    1.49
  -7   0  -5   16.18    0.93
  -8   0  -5    4.40    1.62
  -8   0  -5    3.48    0.98
  -9   0  -5   77.23    3.81
  -9   0  -5   71.95    3.14
 -10   0  -5    8.03    1.48
 -11   0  -5   23.03    1.58
 -12   0  -5    4.71    1.80
 -13   0  -5   14.09    2.00
 -14   0  -5   -0.17    2.10
 -15   0  -5    8.87    2.31
 -16   0  -5    6.75    2.77
 -18   1   5   11.22    2.41
 -17   1   5   -0.45    1.86
 -16   1   5   95.60    4.85
 -15   1   5    2.36    1.57
 -14   1   5   15.89    1.61
 -13   1   5   16.24    1.37
 -12   1   5   27.66    1.69
 -11   1   5    7.99    1.45
 -10   1   5   30.49    1.49
   9  -1  -5   10.72    2.06
  -9   1   5    8.19    1.25
   8  -1  -5    0.71    1.36
  -7   1   5   81.07    3.11
   6  -1  -5    8.06    1.06
   6  -1  -5    9.04    1.25
  -6   1   5    8.40    0.56
  -6   1   5    9.07    1.51
  -6   1   5    7.98    0.93
   5  -1  -5   75.57    3.52
   5  -1  -5   77.28    3.30
   5  -1  -5   79.43    3.83
  -5   1   5   76.49    3.85
  -5   1   5   79.07    3.34
  -5   1   5   75.78    3.47
   4  -1  -5  269.04    6.54
   4  -1  -5  263.71    6.96
   4  -1  -5  261.41    6.62
  -4   1   5  260.91    6.58
  -4   1   5  261.34    6.97
  -4   1   5  265.13    6.54
   3  -1  -5   13.73    1.42
   3  -1  -5   12.17    0.83
  -3   1   5   14.17    1.39
  -3   1   5   12.89    0.65
  -3   1   5   13.06    0.79
   2  -1  -5   24.25    1.12
   2  -1  -5   23.88    0.42
   2  -1  -5   23.61    0.52
  -2   1   5   24.16    1.03
  -2   1   5   23.91    0.38
  -2   1   5   23.87    0.51
   1  -1  -5   35.31    3.13
   1  -1  -5   35.78    2.55
  -1   1   5   35.51    2.55
   0  -1  -5   41.42    1.56
   0   1   5   41.92    1.51
  -1  -1  -5    5.36    0.65
  -1  -1  -5    5.20    0.52
   1   1   5    5.25    0.80
  -2  -1  -5   83.28    2.51
  -2  -1  -5   85.13    2.49
   2   1   5   81.18    2.77
   2   1   5   81.79    2.43
  -3  -1  -5   -0.19    1.19
  -3  -1  -5    0.63    0.72
  -4  -1  -5  156.25    3.95
   4   1   5  155.44    4.04
  -5  -1  -5  225.17    4.75
   5   1   5  223.85    4.77
  -6  -1  -5   50.18    1.89
   6   1   5   48.71    1.78
 -10  -1  -5   36.16    1.86
 -11  -1  -5   40.39    1.63
 -12  -1  -5   29.93    2.17
 -13  -1  -5   18.30    1.98
 -14  -1  -5    3.58    2.44
 -15  -1  -5    5.19    2.55
 -18   2   5    1.15    2.21
 -17   2   5   15.59    2.19
 -16   2   5    2.73    1.90
 -15   2   5   10.72    1.70
 -14   2   5   51.63    2.03
 -13   2   5  105.79    3.75
 -12   2   5   46.58    2.29
 -11   2   5    0.64    1.00
 -10   2   5    1.82    1.01
  -9   2   5    3.77    0.81
  -8   2   5   37.23    1.71
  -7   2   5  627.25   16.01
   6  -2  -5  126.51    3.46
  -6   2   5  126.63    3.03
  -6   2   5  122.45    2.82
   5  -2  -5  316.58    6.60
   5  -2  -5  317.20    6.16
  -5   2   5  317.45    6.25
  -5   2   5  315.63    6.66
  -5   2   5  315.61    6.18
   4  -2  -5    3.19    1.13
  -4   2   5    3.49    0.96
  -4   2   5    3.12    0.35
  -4   2   5    3.27    0.54
   3  -2  -5  103.30    2.88
  -3   2   5  104.66    2.40
  -3   2   5  105.85    2.94
   2  -2  -5  616.20   20.63
   2  -2  -5  609.42   20.31
  -2   2   5  614.07   20.33
  -2   2   5  614.51   20.63
   1  -2  -5  204.19    8.23
   1  -2  -5  198.84    7.87
  -1   2   5  199.52    7.89
  -1   2   5  199.26    8.18
   0  -2  -5   53.41    1.78
   0   2   5   55.62    1.73
  -1  -2  -5   88.10    2.21
  -1  -2  -5   86.61    2.44
  -2  -2  -5   14.54    1.33
  -3  -2  -5    6.83    0.83
  -3  -2  -5    6.28    0.84
  -4  -2  -5   32.51    0.94
   4   2   5   32.50    0.96
  -6  -2  -5   -0.43    1.83
  -6  -2  -5    0.81    0.98
   6   2   5    0.17    0.85
  -8  -2  -5   19.50    1.32
  -9  -2  -5   61.65    1.71
 -10  -2  -5    9.05    1.48
 -11  -2  -5   57.35    2.04
 -12  -2  -5   12.99    1.96
 -13  -2  -5   12.72    2.23
 -14  -2  -5    6.86    2.46
 -15  -2  -5   12.60    2.68
 -19   3   5    3.65    2.60
 -18   3   5    2.17    2.17
 -17   3   5    1.52    2.02
 -16   3   5   45.03    2.75
 -15   3   5   14.04    1.62
 -14   3   5   60.88    2.99
 -13   3   5    7.95    1.51
 -12   3   5   25.39    1.48
 -11   3   5    1.70    0.93
 -10   3   5    5.82    1.10
  -9   3   5   13.97    0.89
  -8   3   5  331.77    9.68
  -7   3   5    5.24    0.65
   6  -3  -5   33.77    1.26
  -6   3   5   32.85    0.88
   5  -3  -5   41.85    1.77
  -5   3   5   43.20    1.34
   4  -3  -5    6.91    1.19
  -4   3   5    6.32    1.06
  -4   3   5    6.94    0.72
  -4   3   5    6.72    0.62
   3  -3  -5   23.58    1.27
   3  -3  -5   23.24    1.89
  -3   3   5   22.81    1.26
  -3   3   5   24.30    1.86
   2  -3  -5  747.11   19.64
   2  -3  -5  738.99   19.92
  -2   3   5  734.59   19.94
  -2   3   5  745.45   19.66
   1  -3  -5  396.82    5.85
   1  -3  -5  393.70    6.17
  -1   3   5  392.50    6.17
  -1   3   5  393.78    5.86
   0  -3  -5  422.48    9.60
   0  -3  -5  424.75    9.37
   0   3   5  418.45    9.33
  -1  -3  -5  284.47    8.58
  -1  -3  -5  286.30    8.36
  -2  -3  -5   56.92    2.16
  -2  -3  -5   55.90    2.83
  -3  -3  -5    2.84    1.01
  -3  -3  -5    1.92    1.01
  -4  -3  -5   28.76    1.46
  -4  -3  -5   28.19    2.22
   4   3   5   29.88    1.63
  -5  -3  -5    2.05    0.96
   5   3   5    2.24    0.93
  -6  -3  -5   33.19    1.22
  -7  -3  -5  259.83    4.89
  -8  -3  -5   19.23    2.49
  -9  -3  -5    8.91    1.47
 -10  -3  -5   11.87    1.72
 -11  -3  -5   95.06    2.15
 -12  -3  -5    1.34    1.97
 -13  -3  -5    7.07    2.33
 -14  -3  -5    4.61    2.88
 -15  -3  -5    2.42    2.95
 -19   4   5    0.34    2.35
 -18   4   5    1.62    2.22
 -17   4   5    4.76    2.01
 -16   4   5   21.65    2.09
 -15   4   5    0.05    1.55
 -14   4   5    7.31    1.46
 -13   4   5   41.33    2.44
 -12   4   5    1.65    1.13
 -11   4   5   19.77    1.66
 -10   4   5  112.48    3.22
  -9   4   5  178.99    4.78
  -8   4   5    7.71    0.95
  -7   4   5  114.41    2.49
   6  -4  -5    1.85    1.42
  -6   4   5    0.32    0.83
  -6   4   5    1.05    0.58
   5  -4  -5  292.40   10.49
  -5   4   5  283.90   10.00
  -5   4   5  282.99   10.04
   4  -4  -5   16.56    1.31
  -4   4   5   16.10    0.67
   3  -4  -5    3.13    0.68
  -3   4   5    3.20    0.82
   2  -4  -5  420.04    7.35
   2  -4  -5  426.76    7.04
  -2   4   5  418.74    7.41
   1  -4  -5   76.61    3.08
   1  -4  -5   74.94    2.68
  -1   4   5   75.22    3.14
   0  -4  -5  146.26    3.60
   0  -4  -5  147.98    3.93
   0   4   5  146.36    3.95
  -1  -4  -5   21.23    1.03
  -1  -4  -5   21.47    1.63
   1   4   5   20.62    0.99
  -2  -4  -5  101.64    1.82
  -2  -4  -5   99.26    2.01
  -3  -4  -5    0.04    1.01
  -3  -4  -5    0.84    1.04
  -3  -4  -5    0.75    1.59
   3   4   5    0.24    1.18
  -4  -4  -5    4.74    1.01
  -4  -4  -5    6.41    1.61
   4   4   5    5.01    1.08
   4   4   5    5.60    1.34
  -5  -4  -5   12.76    1.32
  -6  -4  -5    1.15    1.26
  -7  -4  -5   12.81    1.42
  -8  -4  -5   22.86    1.77
  -9  -4  -5   17.90    1.90
 -10  -4  -5   96.35    2.06
 -11  -4  -5   -0.49    2.01
 -12  -4  -5   -0.57    2.35
 -13  -4  -5    4.20    2.45
 -14  -4  -5   -0.38    2.84
 -19   5   5    5.95    2.39
 -18   5   5    2.85    2.29
 -17   5   5    0.21    1.83
 -16   5   5   -0.41    1.65
 -15   5   5   26.42    2.29
 -14   5   5    3.37    1.40
 -13   5   5   27.36    1.90
 -12   5   5   40.05    2.21
 -11   5   5   86.46    3.17
 -10   5   5    2.35    0.94
  -9   5   5    4.61    0.83
  -8   5   5   83.32    2.43
  -7   5   5  246.47    6.25
  -7   5   5  240.84    6.36
   5  -5  -5   41.09    2.30
  -5   5   5   43.18    1.43
   4  -5  -5  490.14   10.13
   3  -5  -5  139.79    3.88
   3  -5  -5  136.50    4.30
   2  -5  -5  115.53    4.30
   2  -5  -5  117.60    4.68
   1  -5  -5  134.01    1.85
   1  -5  -5  135.50    2.27
  -1   5   5  133.36    2.20
   0  -5  -5    9.88    1.25
   0  -5  -5   10.31    1.61
   0   5   5    8.63    1.68
  -1  -5  -5   62.67    1.32
  -1  -5  -5   62.68    1.49
  -1  -5  -5   64.23    1.88
   1   5   5   61.89    1.23
   1   5   5   61.76    1.97
  -2  -5  -5    4.28    1.12
  -2  -5  -5    5.07    1.54
  -2  -5  -5    5.14    0.96
   2   5   5    6.26    1.20
   2   5   5    4.73    1.43
  -3  -5  -5   36.16    1.86
  -3  -5  -5   34.66    1.44
   3   5   5   34.11    1.42
   3   5   5   34.00    1.53
  -4  -5  -5   56.02    2.60
  -4  -5  -5   54.89    1.84
   4   5   5   53.90    2.15
  -5  -5  -5   45.82    2.05
   5   5   5   43.57    2.26
  -6  -5  -5   73.82    3.64
   6   5   5   77.18    4.14
  -7  -5  -5    5.45    1.62
  -8  -5  -5   80.88    2.09
  -9  -5  -5   60.06    2.03
 -10  -5  -5    0.79    2.06
 -11  -5  -5   -0.40    2.13
 -12  -5  -5    1.59    2.30
 -13  -5  -5   14.41    2.94
 -19   6   5   14.24    2.76
 -18   6   5   -0.47    1.89
 -17   6   5    0.70    1.81
 -16   6   5    1.14    1.73
 -15   6   5   42.82    3.13
 -14   6   5    2.35    1.32
 -13   6   5   65.53    2.61
 -12   6   5    5.62    1.15
 -11   6   5   24.61    1.31
 -10   6   5   35.04    1.06
  -9   6   5    1.10    0.83
  -8   6   5    7.87    0.97
  -7   6   5    1.64    0.69
  -7   6   5    1.14    1.04
  -6   6   5    1.51    0.62
  -5   6   5  617.77   14.79
   4  -6  -5   11.34    1.88
   4  -6  -5   12.43    1.46
   3  -6  -5   35.95    2.57
   3  -6  -5   38.73    2.06
   2  -6  -5  161.05    5.89
   2  -6  -5  159.87    5.54
   1  -6  -5  464.98    6.87
   1  -6  -5  460.06    6.59
   0  -6  -5   63.05    1.67
   0  -6  -5   62.31    1.40
   0   6   5   61.57    1.03
  -1  -6  -5  186.33    3.66
   1   6   5  185.79    3.32
  -2  -6  -5    3.59    1.65
  -2  -6  -5    1.59    1.41
  -2  -6  -5    3.50    1.24
  -3  -6  -5   48.49    1.58
  -3  -6  -5   47.45    1.83
   3   6   5   46.87    1.57
   3   6   5   47.16    1.64
  -4  -6  -5   14.28    1.44
  -4  -6  -5   15.44    1.69
   4   6   5   16.51    1.85
   4   6   5   15.75    1.52
  -5  -6  -5   94.54    1.97
   5   6   5   95.79    2.39
  -6  -6  -5   48.39    1.86
   6   6   5   50.33    2.49
  -7  -6  -5   50.09    1.88
  -8  -6  -5   54.84    2.36
  -9  -6  -5   -0.07    1.85
 -10  -6  -5    0.97    2.19
 -11  -6  -5    4.06    2.65
 -12  -6  -5    3.44    2.89
 -13  -6  -5   12.70    3.10
 -19   7   5    3.68    2.35
 -18   7   5   -0.02    1.93
 -17   7   5    7.41    1.97
 -16   7   5    0.90    1.62
 -15   7   5    0.14    1.41
 -14   7   5   16.61    1.71
 -13   7   5   57.34    2.87
 -12   7   5    9.65    1.17
 -11   7   5   36.00    2.21
 -10   7   5    2.42    0.97
  -9   7   5   76.66    2.25
  -8   7   5   32.54    1.61
  -7   7   5   11.76    0.69
  -6   7   5   89.00    1.81
  -5   7   5  182.06    3.46
   4  -7  -5    7.41    1.12
   3  -7  -5    3.35    1.04
   3  -7  -5    4.54    1.35
   2  -7  -5   46.77    1.64
   2  -7  -5   45.77    1.23
  -2   7   5   46.03    0.88
   1  -7  -5  342.12    4.24
   0  -7  -5  315.50    5.91
  -1  -7  -5  400.29    5.57
  -1  -7  -5  405.51    5.72
   1   7   5  397.39    5.27
  -2  -7  -5    4.20    1.81
  -2  -7  -5    4.54    1.61
   2   7   5    2.62    1.92
  -3  -7  -5   16.02    1.56
  -3  -7  -5   16.01    1.80
   3   7   5   15.57    1.76
  -4  -7  -5   88.25    2.40
   4   7   5   87.90    2.56
  -5  -7  -5   -0.19    1.67
   5   7   5    0.53    2.19
  -6  -7  -5   69.46    2.09
   6   7   5   68.64    2.72
  -7  -7  -5    2.43    2.07
   7   7   5    3.16    2.84
  -8  -7  -5  102.81    2.61
  -9  -7  -5   18.29    2.19
 -10  -7  -5    1.17    2.44
 -12  -7  -5    4.75    2.98
 -19   8   5    0.82    2.24
 -18   8   5    8.11    2.21
 -17   8   5    5.27    2.09
 -16   8   5   17.12    1.92
 -15   8   5    5.14    1.52
 -14   8   5    3.44    1.38
 -13   8   5   49.09    2.64
 -12   8   5   13.00    1.32
 -11   8   5   32.43    1.70
 -10   8   5   31.88    1.16
  -9   8   5   53.34    1.68
  -8   8   5    4.33    0.95
  -7   8   5  327.57    6.81
  -6   8   5  119.21    4.55
   4  -8  -5  242.55    6.76
   3  -8  -5   26.48    1.30
   2  -8  -5  179.99    2.47
  -2   8   5  176.71    1.89
   1  -8  -5  154.91    2.86
  -1   8   5  154.21    2.36
   0  -8  -5  117.19    3.17
   0   8   5  115.95    2.70
  -1  -8  -5  352.56    6.86
   1   8   5  354.05    6.51
  -2  -8  -5   59.74    1.62
   2   8   5   60.79    1.65
  -3  -8  -5   57.75    2.71
   3   8   5   57.97    2.96
  -4  -8  -5   24.54    1.85
   4   8   5   25.82    2.23
   5   8   5    3.09    2.61
  -6  -8  -5   38.49    2.37
   6   8   5   40.95    2.98
  -7  -8  -5   -0.37    2.10
   7   8   5    2.20    3.19
  -8  -8  -5    1.21    2.33
  -9  -8  -5   18.44    2.76
 -10  -8  -5   20.63    2.80
 -11  -8  -5   -0.10    2.99
 -12  -8  -5    0.97    3.46
 -19   9   5    9.84    2.56
 -18   9   5    1.85    2.11
 -17   9   5    6.52    2.06
 -16   9   5   10.49    1.84
 -15   9   5    7.48    1.73
 -14   9   5    8.54    1.66
 -13   9   5   26.97    1.96
 -12   9   5   19.78    1.65
 -11   9   5    0.67    0.99
 -10   9   5    8.78    1.06
  -9   9   5  153.63    3.81
  -8   9   5    6.17    0.92
  -7   9   5   58.27    1.51
  -6   9   5    0.42    0.74
   5  -9  -5   92.39    3.25
   4  -9  -5   61.31    2.60
   3  -9  -5    0.66    1.32
  -3   9   5    0.49    1.00
   2  -9  -5  123.07    1.99
  -2   9   5  124.56    1.69
   1  -9  -5   22.50    1.46
  -1   9   5   23.77    1.25
   0  -9  -5   16.75    1.80
   0   9   5   19.19    1.68
  -1  -9  -5  162.99    2.55
   1   9   5  163.45    2.58
  -2  -9  -5   37.07    1.79
   2   9   5   38.76    1.83
  -3  -9  -5   18.64    2.12
   3   9   5   17.39    2.25
  -4  -9  -5   37.66    1.99
   4   9   5   38.85    2.39
  -5  -9  -5   10.47    2.12
   5   9   5   11.23    2.87
  -6  -9  -5    4.89    2.22
   6   9   5    8.24    3.20
  -7  -9  -5   41.22    2.43
   7   9   5   39.72    3.40
  -8  -9  -5   20.57    2.93
  -9  -9  -5    2.50    2.69
 -10  -9  -5   -0.61    3.18
 -11  -9  -5    3.47    3.43
 -19  10   5   -0.56    2.16
 -18  10   5   -0.02    2.08
 -17  10   5   -0.34    1.77
 -16  10   5    5.21    1.75
 -15  10   5    4.81    1.46
 -14  10   5   15.35    1.66
 -13  10   5    1.67    1.30
 -12  10   5   35.64    2.14
 -11  10   5    7.18    1.30
 -10  10   5  150.25    3.62
  -9  10   5    0.39    1.00
  -8  10   5   95.97    2.88
  -7  10   5  211.21    4.13
  -6  10   5   21.80    0.96
   5 -10  -5  189.15    5.89
   4 -10  -5   82.10    2.60
   3 -10  -5    2.52    1.54
  -3  10   5    2.07    1.18
   2 -10  -5   63.14    1.80
  -2  10   5   64.22    1.53
  -1  10   5   26.19    2.12
   0 -10  -5   51.69    2.20
   0  10   5   53.51    2.08
  -1 -10  -5    2.37    2.01
   1  10   5    1.34    1.88
  -2 -10  -5  153.66    2.38
   2  10   5  151.08    2.26
  -3 -10  -5   73.47    2.29
   3  10   5   73.42    2.51
  -4 -10  -5   10.99    2.29
   4  10   5   15.00    2.92
  -5 -10  -5    6.20    2.39
   5  10   5    6.07    2.90
  -6 -10  -5   13.94    2.40
   6  10   5   13.66    3.46
  -7 -10  -5   11.61    2.52
   7  10   5   13.00    3.85
  -8 -10  -5   10.91    3.05
   8  10   5   13.72    4.43
  -9 -10  -5   24.48    3.36
 -10 -10  -5   -0.81    3.27
 -19  11   5   11.04    2.67
 -18  11   5    0.46    2.04
 -17  11   5   27.43    2.48
 -16  11   5    1.09    1.66
 -15  11   5    5.39    1.67
 -14  11   5    0.32    1.41
 -13  11   5    1.39    1.25
 -12  11   5  246.99    7.82
 -11  11   5   44.94    2.22
 -10  11   5    8.08    1.15
  -9  11   5    6.90    0.99
  -8  11   5    1.38    1.00
  -7  11   5   79.16    1.80
   5 -11  -5  112.50    3.84
   4 -11  -5  232.18    5.98
   3 -11  -5   22.82    1.71
  -3  11   5   22.42    1.36
   2 -11  -5    0.14    1.57
  -2  11   5    2.19    1.44
   1 -11  -5    1.21    1.90
  -1  11   5    1.79    1.64
   0 -11  -5    4.69    1.86
   0  11   5    4.57    1.90
  -1 -11  -5    3.19    2.08
   1  11   5    7.25    2.14
  -2 -11  -5   11.29    2.14
   2  11   5    9.71    2.38
  -3 -11  -5    0.52    2.32
   3  11   5    1.30    2.76
  -4 -11  -5    0.55    2.28
   4  11   5    0.68    2.89
  -5 -11  -5   12.08    2.63
   5  11   5   12.60    3.40
  -6 -11  -5    2.28    2.74
   6  11   5    4.16    3.83
  -7 -11  -5    3.40    2.91
   7  11   5    9.50    4.31
  -8 -11  -5   23.19    3.25
   8  11   5   21.18    4.72
  -9 -11  -5    9.83    3.45
 -18  12   5    3.39    2.16
 -17  12   5    5.62    1.90
 -16  12   5    9.79    2.00
 -15  12   5   19.18    1.71
 -14  12   5   10.22    1.46
 -13  12   5   14.10    1.49
 -12  12   5   35.34    2.42
 -11  12   5   16.48    1.41
 -10  12   5    6.62    1.15
  -9  12   5    8.62    1.09
  -8  12   5    8.98    1.14
  -7  12   5  101.73    1.84
   5 -12  -5    5.48    1.81
   4 -12  -5   13.23    1.81
  -4  12   5   12.80    1.63
   3 -12  -5   10.10    1.92
  -3  12   5    9.56    1.52
   2 -12  -5    3.13    1.76
  -2  12   5    4.85    1.65
   1 -12  -5   61.00    2.27
  -1  12   5   60.48    2.02
   0 -12  -5    2.29    2.09
   0  12   5    3.23    2.15
  -1 -12  -5   16.82    2.59
   1  12   5   16.91    2.62
  -2 -12  -5    9.64    2.49
   3  12   5    1.67    3.07
  -4 -12  -5   -0.42    2.62
   4  12   5    1.73    3.30
  -5 -12  -5   26.23    2.89
   5  12   5   27.94    3.70
  -6 -12  -5    7.52    3.10
   6  12   5    6.08    4.09
  -7 -12  -5    8.33    3.36
   7  12   5   12.44    4.65
  -8 -12  -5    5.77    3.76
   8  12   5    4.18    5.20
 -18  13   5    0.96    2.11
 -17  13   5    2.84    1.90
 -16  13   5   21.38    2.11
 -15  13   5    4.72    1.65
 -14  13   5   22.15    1.74
 -13  13   5    1.22    1.39
 -12  13   5    1.56    1.42
 -11  13   5   15.32    1.45
 -10  13   5   28.17    1.51
  -9  13   5   10.11    1.13
  -8  13   5   53.80    2.21
  -7  13   5    1.84    1.12
   5 -13  -5   71.60    3.36
   4 -13  -5   95.46    2.23
  -4  13   5   96.28    1.91
   3 -13  -5   13.53    2.17
  -3  13   5   12.12    1.77
   2 -13  -5   15.10    2.10
  -2  13   5   14.37    1.92
   1 -13  -5    0.38    2.08
  -1  13   5    1.01    2.05
   0 -13  -5   -0.35    2.20
   0  13   5    2.47    2.51
  -1 -13  -5    6.97    2.31
   1  13   5    7.58    2.59
  -2 -13  -5   14.66    2.59
   2  13   5   15.12    2.99
  -3 -13  -5    4.18    2.83
   3  13   5    1.29    3.19
  -4 -13  -5    9.37    3.10
   4  13   5    9.34    3.69
  -5 -13  -5    3.04    3.27
   5  13   5    1.81    3.98
  -6 -13  -5    2.76    3.56
   6  13   5    0.68    4.48
  -7 -13  -5    4.50    3.66
   7  13   5    8.86    4.99
 -18  14   5    0.76    2.14
 -17  14   5    8.04    2.05
 -16  14   5    3.14    1.90
 -15  14   5    2.74    1.78
 -14  14   5    0.56    1.53
 -13  14   5    1.01    1.45
 -12  14   5   39.31    2.15
 -11  14   5    0.70    1.33
 -10  14   5   24.91    1.49
  -9  14   5    3.49    1.38
  -8  14   5   10.80    1.51
  -7  14   5   12.31    1.27
   5 -14  -5    4.36    2.06
   4 -14  -5  107.04    2.54
  -4  14   5  109.62    2.30
   3 -14  -5   -0.25    2.30
  -3  14   5   -0.15    1.92
   2 -14  -5    4.36    2.53
  -2  14   5    0.17    2.10
   1 -14  -5    7.75    2.33
  -1  14   5    9.39    2.31
   0 -14  -5   -0.23    2.49
   0  14   5    0.21    2.71
  -1 -14  -5    0.99    2.67
   1  14   5    0.34    3.00
  -2 -14  -5   17.59    3.04
   2  14   5   17.67    3.12
  -3 -14  -5   -0.73    2.89
   3  14   5    0.55    3.72
  -4 -14  -5   -0.83    3.42
   4  14   5    1.08    4.06
   5  14   5    3.09    4.47
  -6 -14  -5   -0.66    3.67
   6  14   5    9.77    5.03
 -17  15   5    2.39    2.02
 -16  15   5    0.31    1.78
 -15  15   5    6.55    1.80
 -14  15   5    1.05    1.58
 -13  15   5    6.00    1.64
 -12  15   5   22.06    2.01
 -11  15   5   11.90    1.65
 -10  15   5    0.92    1.40
  -9  15   5    3.21    1.40
  -8  15   5    1.81    1.34
  -7  15   5    1.83    1.30
   5 -15  -5    1.93    2.28
  -5  15   5    2.56    2.12
   4 -15  -5   15.18    2.28
   3 -15  -5   35.28    2.49
  -3  15   5   36.59    2.39
   2 -15  -5    6.85    2.41
  -2  15   5    7.74    2.43
   1 -15  -5   12.67    2.47
  -1  15   5   12.72    2.57
   0 -15  -5   17.34    2.57
   0  15   5   17.16    3.22
  -1 -15  -5    3.06    2.72
   1  15   5    7.23    3.17
  -2 -15  -5    0.13    2.94
   2  15   5    3.23    3.69
  -3 -15  -5   11.13    3.51
   3  15   5    9.42    3.90
  -4 -15  -5    2.69    3.48
   4  15   5    2.47    4.32
  -5 -15  -5   27.52    4.14
   5  15   5   26.55    4.81
 -17  16   5    2.54    2.13
 -16  16   5    6.08    1.96
 -15  16   5   13.81    2.05
 -14  16   5    0.60    1.61
 -13  16   5    3.16    1.71
 -12  16   5    7.87    1.82
 -11  16   5   30.87    1.95
 -10  16   5    3.94    1.39
  -9  16   5    7.93    1.49
  -8  16   5   14.09    1.49
  -7  16   5    5.81    1.42
  -6  16   5   14.47    2.40
   5 -16  -5    0.41    2.67
  -5  16   5   -0.61    2.37
   4 -16  -5   -0.09    2.50
  -4  16   5   -0.05    2.35
   3 -16  -5   14.88    2.62
  -3  16   5   14.71    2.49
   2 -16  -5   -0.15    2.65
  -2  16   5    2.24    2.79
   1 -16  -5   -0.66    2.70
  -1  16   5   -0.18    3.18
   0 -16  -5   18.06    3.02
   0  16   5   21.00    3.32
  -1 -16  -5    8.12    3.50
   1  16   5    8.15    3.65
  -2 -16  -5   22.18    3.56
   2  16   5   21.08    4.00
  -3 -16  -5   -0.86    3.64
  -4 -16  -5    2.14    4.12
   4  16   5    5.84    4.63
 -16  17   5    6.57    2.25
 -15  17   5   16.78    2.07
 -14  17   5    0.85    1.82
 -13  17   5    1.35    1.81
 -12  17   5    8.17    1.90
 -11  17   5    0.83    1.67
 -10  17   5    6.92    1.69
  -9  17   5    4.19    1.55
  -8  17   5    2.85    1.54
  -7  17   5    6.43    1.58
  -6  17   5    4.80    2.65
   5 -17  -5    2.04    2.98
  -5  17   5    2.81    2.69
   4 -17  -5    0.43    2.80
  -4  17   5    0.26    2.68
   3 -17  -5    7.66    2.94
  -3  17   5    4.85    2.93
   2 -17  -5    3.39    3.05
  -2  17   5    2.37    3.01
   1 -17  -5    6.40    3.31
  -1  17   5    4.21    3.37
   0 -17  -5   16.21    3.25
   0  17   5   17.50    3.58
  -1 -17  -5    2.31    3.68
   1  17   5    0.06    3.77
  -2 -17  -5   -0.90    3.53
   2  17   5   -0.07    4.15
 -15  18   5    9.22    2.11
 -14  18   5    2.83    1.94
 -13  18   5   -0.15    1.85
 -12  18   5    2.13    1.78
 -11  18   5    1.39    1.76
 -10  18   5   -0.25    1.64
  -9  18   5   12.92    1.85
  -8  18   5    1.70    1.83
  -7  18   5    0.79    3.41
  -7  18   5    0.09    1.71
  -6  18   5    0.81    3.22
   5 -18  -5    1.53    3.16
   4 -18  -5    5.97    3.18
  -4  18   5    4.31    2.90
   3 -18  -5   11.42    3.40
  -3  18   5   10.04    2.97
   2 -18  -5    1.54    3.62
  -2  18   5    3.83    3.27
   1 -18  -5   25.35    3.41
  -1  18   5   28.53    3.82
   0 -18  -5    7.15    3.66
   0  18   5    7.12    3.75
  -1 -18  -5    2.73    3.98
   1  18   5    1.84    4.36
 -14  19   5    1.10    2.17
 -13  19   5   10.29    2.19
 -12  19   5   -0.34    1.90
 -11  19   5    2.65    1.99
 -10  19   5    1.38    1.99
  -9  19   5   10.29    1.89
  -8  19   5    3.92    1.91
  -7  19   5   21.41    2.12
  -7  19   5   19.01    3.46
  -6  19   5    5.65    3.16
   5 -19  -5    1.60    3.51
  -5  19   5    2.90    3.07
   4 -19  -5   10.22    3.40
  -4  19   5    9.80    3.55
   3 -19  -5   -0.83    3.63
   2 -19  -5   -0.75    3.62
   1 -19  -5   -0.55    4.08
 -12  20   5   -0.52    2.11
 -11  20   5    3.18    2.12
 -10  20   5    0.29    2.02
  -9  20   5    0.91    2.03
  -8  20   5   -0.51    2.00
  -7  20   5    3.78    2.14
   5 -20  -5    7.08    3.67
   4 -20  -5   -0.63    3.90
  -3  23  -6    2.04    4.04
  -3  23  -6    3.27    4.91
  -4  23  -6    0.92    2.04
  -4  23  -6   -0.61    3.85
  -5  23  -6    1.38    2.08
  -5  23  -6   -0.99    4.45
  -5  23  -6   -0.87    3.99
  -6  23  -6    2.70    4.17
  -6  23  -6    1.75    2.01
  -7  23  -6    2.88    3.84
  -7  23  -6    5.28    2.03
  -8  23  -6   11.65    2.28
  -8  23  -6   10.13    4.07
  -9  23  -6    5.07    3.71
  -9  23  -6    8.58    2.10
 -10  23  -6   -0.61    3.58
 -10  23  -6    1.48    2.15
 -11  23  -6    3.60    2.22
 -11  23  -6    3.50    3.59
   0  22  -6    4.55    4.57
   0 -22   6    7.28    3.60
  -1  22  -6   11.35    4.65
  -1  22  -6   12.61    3.82
   1 -22   6    9.39    3.33
  -2  22  -6    2.75    3.81
  -2  22  -6    1.36    4.62
  -3  22  -6    8.08    4.53
  -3  22  -6    8.45    3.67
  -4  22  -6    3.49    4.38
  -4  22  -6    3.70    3.59
  -4  22  -6    4.17    1.79
  -5  22  -6    4.33    1.90
  -5  22  -6    1.65    3.55
  -6  22  -6   -0.48    1.83
  -6  22  -6   -0.79    3.33
  -7  22  -6    3.90    3.84
  -7  22  -6    4.27    1.88
  -8  22  -6    3.14    1.85
  -8  22  -6    1.93    3.39
  -9  22  -6    0.02    3.34
  -9  22  -6    0.18    1.91
 -10  22  -6   -0.14    1.91
 -10  22  -6   -0.16    3.46
 -11  22  -6    3.78    3.38
 -11  22  -6    4.14    2.13
 -12  22  -6    6.69    2.18
 -12  22  -6    6.09    3.35
 -13  22  -6    0.58    3.61
 -13  22  -6    3.01    2.23
  -2 -21   6   -0.72    3.88
   1  21  -6    0.95    4.53
  -1 -21   6   -0.92    3.54
   0  21  -6    8.91    4.41
   0  21  -6    4.40    3.64
   0 -21   6    3.86    3.38
  -1  21  -6   -0.77    4.02
  -1  21  -6    1.02    3.36
   1 -21   6    1.50    3.10
  -2  21  -6    2.78    3.33
  -2  21  -6    3.91    3.97
   2 -21   6    5.06    2.88
  -3  21  -6   11.42    3.35
  -3  21  -6   13.74    3.73
  -4  21  -6   19.17    1.72
  -4  21  -6   20.93    3.46
  -5  21  -6   11.53    3.19
  -6  21  -6    5.80    3.34
  -6  21  -6    5.74    1.78
  -7  21  -6    4.08    1.62
  -7  21  -6    3.29    3.11
  -8  21  -6    5.62    3.04
  -8  21  -6    5.03    1.66
  -9  21  -6    0.58    1.78
  -9  21  -6    4.59    3.23
 -10  21  -6   -0.61    2.78
 -10  21  -6   -0.27    1.82
 -11  21  -6    0.46    3.02
 -11  21  -6   -0.21    1.84
 -12  21  -6   11.33    2.08
 -12  21  -6    6.92    3.00
 -13  21  -6    4.33    3.53
 -14  21  -6    1.15    1.99
 -14  21  -6   -0.13    3.44
   3  20  -6    1.83    4.48
  -3 -20   6    2.18    3.70
   2  20  -6    4.71    4.16
  -2 -20   6    4.60    3.49
   1  20  -6    1.83    3.95
   1  20  -6    3.03    3.40
  -1 -20   6   -0.62    3.07
   0  20  -6    6.31    3.04
   0  20  -6    9.18    3.66
   0 -20   6    6.33    2.98
  -1  20  -6    4.01    3.76
  -1  20  -6    1.86    3.10
   1 -20   6    1.39    2.82
  -2  20  -6    2.48    3.52
  -2  20  -6    2.98    2.99
   2 -20   6    2.87    2.59
  -3  20  -6   51.41    3.53
  -3  20  -6   48.69    3.80
  -4  20  -6   12.18    3.10
  -4  20  -6   13.69    1.78
  -5  20  -6    6.34    1.48
  -5  20  -6    6.37    3.02
  -6  20  -6    7.06    2.73
  -7  20  -6    1.25    1.42
  -7  20  -6    2.31    2.95
  -8  20  -6   14.42    1.77
  -8  20  -6   12.63    2.77
  -9  20  -6   25.40    2.12
  -9  20  -6   21.98    3.18
 -10  20  -6   12.57    1.91
 -10  20  -6   11.94    3.27
 -11  20  -6    1.39    1.64
 -11  20  -6    4.60    3.29
 -12  20  -6    3.50    1.80
 -12  20  -6    0.30    2.83
 -13  20  -6   -0.59    2.87
 -13  20  -6   -0.45    1.85
 -14  20  -6    4.66    3.24
 -14  20  -6    3.82    2.09
 -15  20  -6    0.27    2.10
 -15  20  -6   -0.89    3.44
   5  19  -6    6.40    4.51
  -5 -19   6   10.60    3.98
   4  19  -6    8.73    4.12
  -4 -19   6   10.90    3.76
  -3 -19   6    2.58    3.48
   2  19  -6    1.50    3.57
   2  19  -6    0.53    3.75
  -2 -19   6    0.18    3.28
   1  19  -6    1.63    3.58
   1  19  -6    1.17    3.30
  -1 -19   6   -0.71    2.98
   0  19  -6   15.06    3.46
  -1  19  -6    5.72    2.82
  -1  19  -6    3.03    3.18
   1 -19   6    3.20    2.54
  -2  19  -6    2.56    3.09
  -2  19  -6    0.82    2.73
   2 -19   6    1.32    2.41
  -3  19  -6   -0.22    2.57
   3 -19   6    0.16    2.10
  -4  19  -6    2.44    1.42
  -4  19  -6    2.18    2.61
  -5  19  -6   12.98    1.46
  -5  19  -6   12.36    2.68
  -6  19  -6    6.13    1.40
  -6  19  -6    8.39    2.58
  -7  19  -6    2.29    1.46
  -7  19  -6    1.33    2.47
  -8  19  -6    2.38    1.45
  -8  19  -6    1.80    2.72
  -9  19  -6    2.69    2.66
  -9  19  -6    2.60    1.54
 -10  19  -6    0.85    1.57
 -10  19  -6    0.97    2.85
 -11  19  -6    3.41    1.70
 -11  19  -6    3.96    2.77
 -12  19  -6    1.71    1.67
 -12  19  -6    3.85    3.45
 -13  19  -6   17.32    3.87
 -13  19  -6   16.82    2.10
 -14  19  -6    7.88    2.04
 -14  19  -6    6.08    3.53
 -15  19  -6    2.93    1.88
 -15  19  -6    2.93    3.43
 -16  19  -6    6.28    2.22
 -16  19  -6    2.23    3.45
  -6 -18   6    4.08    4.28
   5  18  -6    3.47    3.99
  -5 -18   6    2.47    3.56
   4  18  -6    7.02    3.86
  -4 -18   6    2.94    3.31
   3  18  -6    5.90    3.55
  -3 -18   6    7.12    3.28
   2  18  -6    3.41    2.75
   2  18  -6    1.21    3.22
  -2 -18   6    0.28    2.90
   1  18  -6    2.37    3.12
   1  18  -6   -0.25    2.60
  -1 -18   6    0.27    2.70
   0  18  -6   56.10    3.70
   0  18  -6   58.93    3.33
   0 -18   6   57.56    3.15
  -1  18  -6    2.92    2.96
  -1  18  -6    1.62    2.51
   1 -18   6    0.79    2.29
  -2  18  -6   12.03    2.54
  -2  18  -6    9.16    2.86
   2 -18   6    9.17    2.01
  -3  18  -6    3.93    2.40
   3 -18   6    2.89    1.96
  -4  18  -6   -0.54    2.25
  -4  18  -6   -0.26    1.19
  -5  18  -6    9.90    2.25
  -5  18  -6    7.37    1.23
  -6  18  -6   18.34    1.35
  -6  18  -6   16.31    2.57
  -7  18  -6   37.82    1.84
  -7  18  -6   37.42    3.17
  -8  18  -6    1.31    2.56
  -8  18  -6    0.21    1.28
  -9  18  -6   16.43    1.98
  -9  18  -6   14.05    3.02
 -10  18  -6    8.72    1.58
 -10  18  -6    8.38    2.58
 -11  18  -6   -0.35    1.41
 -11  18  -6   -0.39    2.67
 -12  18  -6    0.84    1.57
 -12  18  -6    0.95    2.68
 -13  18  -6   40.15    2.44
 -13  18  -6   38.50    3.58
 -14  18  -6    3.69    1.91
 -14  18  -6    2.77    3.32
 -15  18  -6    1.84    3.32
 -15  18  -6    6.00    1.99
 -16  18  -6    2.68    3.69
 -16  18  -6    4.37    2.19
   7  17  -6   -1.07    4.13
  -7 -17   6    0.59    3.78
   6  17  -6    2.66    4.19
  -6 -17   6    2.92    3.62
   5  17  -6   10.13    3.54
  -5 -17   6    9.20    3.36
   4  17  -6    2.55    3.40
  -4 -17   6    2.63    3.26
   3  17  -6    2.06    3.03
  -3 -17   6    7.94    2.98
   2  17  -6    1.92    2.41
   2  17  -6    0.51    2.78
  -2 -17   6    0.54    2.66
   1  17  -6   -0.29    2.40
   1  17  -6   -0.45    2.87
  -1 -17   6    0.43    2.54
   0  17  -6    8.02    2.64
   0  17  -6    8.90    2.29
   0 -17   6    8.20    2.14
  -1  17  -6    1.83    2.59
  -1  17  -6    1.37    2.22
   1 -17   6    1.17    2.15
   2 -17   6   14.24    1.98
  -3  17  -6    1.53    2.22
   3 -17   6    0.55    1.63
  -4  17  -6   57.26    2.80
  -4  17  -6   56.51    1.63
  -5  17  -6   12.50    2.30
  -6  17  -6    1.33    1.13
  -6  17  -6    2.03    2.13
  -7  17  -6    7.47    1.37
  -7  17  -6    6.20    2.49
  -8  17  -6   26.68    3.76
  -8  17  -6   27.03    2.44
  -9  17  -6    5.95    2.32
  -9  17  -6    5.65    1.20
 -10  17  -6    1.39    2.55
 -10  17  -6    1.46    1.39
 -11  17  -6   -0.41    2.34
 -11  17  -6   -0.15    1.35
 -12  17  -6    3.27    1.43
 -12  17  -6    3.73    2.49
 -13  17  -6   20.24    3.03
 -13  17  -6   22.59    1.82
 -14  17  -6    1.29    2.82
 -14  17  -6    0.26    1.58
 -15  17  -6    0.69    1.72
 -15  17  -6   -0.09    2.73
 -16  17  -6    0.83    3.18
 -16  17  -6    0.23    1.83
 -17  17  -6    3.92    2.08
 -17  17  -6    4.52    3.61
   8  16  -6    3.36    3.84
  -8 -16   6    3.39    3.75
   7  16  -6    3.45    3.86
  -7 -16   6    2.87    3.35
   6  16  -6   27.01    3.70
  -6 -16   6   27.28    3.23
   5  16  -6    1.75    3.06
  -5 -16   6    3.91    3.12
   4  16  -6   54.79    3.08
  -4 -16   6   58.57    3.08
   3  16  -6   27.02    2.97
  -3 -16   6   25.46    2.69
   2  16  -6    3.27    2.10
   2  16  -6    2.96    2.72
  -2 -16   6    1.59    2.49
   1  16  -6   11.10    2.19
   1  16  -6   10.62    2.61
  -1 -16   6   11.51    2.30
   0  16  -6    1.87    2.11
   0 -16   6    2.28    2.27
  -1  16  -6    0.96    2.39
  -1  16  -6    0.47    2.08
   1 -16   6    1.60    1.80
  -2  16  -6   14.77    1.95
   2 -16   6   15.33    1.71
  -3  16  -6    2.77    1.96
   3 -16   6    1.93    1.53
  -4  16  -6   47.41    1.43
  -4  16  -6   45.81    2.31
  -5  16  -6   18.42    1.24
  -5  16  -6   17.40    2.27
  -6  16  -6   70.15    2.77
  -6  16  -6   69.79    3.95
  -7  16  -6   10.19    1.40
  -8  16  -6    4.41    2.22
  -9  16  -6    3.26    2.11
  -9  16  -6    2.14    1.17
 -10  16  -6    2.66    1.22
 -10  16  -6    3.10    2.30
 -11  16  -6   11.91    1.53
 -11  16  -6   13.21    2.63
 -12  16  -6   24.57    1.76
 -12  16  -6   23.28    2.80
 -13  16  -6    3.00    2.78
 -14  16  -6   -0.48    2.90
 -14  16  -6    1.00    1.58
 -15  16  -6    8.50    3.27
 -15  16  -6    6.57    1.76
 -16  16  -6    4.15    3.15
 -16  16  -6    4.74    1.92
 -17  16  -6   18.42    2.47
 -17  16  -6   14.88    3.54
   9  15  -6    1.57    3.97
  -9 -15   6    1.94    3.47
   8  15  -6    3.92    3.75
  -8 -15   6    3.11    3.26
   7  15  -6   28.34    3.62
  -7 -15   6   26.84    2.95
   6  15  -6    2.60    3.21
  -6 -15   6    2.29    2.97
   5  15  -6    2.51    2.87
  -5 -15   6    2.56    2.62
   4  15  -6    7.98    2.77
  -4 -15   6   10.01    2.71
   3  15  -6   49.76    2.68
  -3 -15   6   52.18    2.64
   2  15  -6    1.90    2.29
   2  15  -6    2.10    1.94
  -2 -15   6    1.11    2.26
   1  15  -6   19.65    2.43
   1  15  -6   20.70    2.11
  -1 -15   6   20.55    2.11
   0  15  -6   10.75    2.38
   0  15  -6   10.03    2.09
   0 -15   6    9.57    1.89
  -1  15  -6    6.13    1.70
   1 -15   6    7.94    1.75
  -2  15  -6    0.86    1.74
   2 -15   6    0.12    1.40
  -3  15  -6   49.01    3.19
  -4  15  -6  115.29    4.43
  -4  15  -6  118.02    3.65
  -5  15  -6  111.16    4.08
  -5  15  -6  106.32    3.14
  -6  15  -6    0.07    1.71
  -7  15  -6   12.15    1.14
  -7  15  -6   11.91    2.07
  -8  15  -6    0.68    1.86
  -8  15  -6    0.77    0.97
  -9  15  -6    4.66    1.95
  -9  15  -6    6.12    1.24
 -10  15  -6   17.80    2.89
 -10  15  -6   17.05    1.54
 -11  15  -6   13.17    2.82
 -11  15  -6   13.69    1.52
 -12  15  -6   75.86    4.98
 -12  15  -6   74.13    3.67
 -13  15  -6   13.61    1.75
 -13  15  -6   10.95    2.88
 -14  15  -6   -0.53    2.63
 -14  15  -6    0.00    1.51
 -15  15  -6    3.46    2.86
 -15  15  -6    3.10    1.68
 -16  15  -6    8.29    3.31
 -16  15  -6    7.81    1.88
 -17  15  -6    3.27    3.26
 -10 -14   6   11.25    3.16
   9  14  -6    4.89    3.85
  -9 -14   6    2.33    3.11
   8  14  -6   10.79    3.46
   7  14  -6   24.28    3.53
  -7 -14   6   21.19    2.88
   6  14  -6   16.72    2.86
  -6 -14   6   16.51    2.54
   5  14  -6    2.94    2.75
  -5 -14   6    1.08    2.40
   4  14  -6    4.67    2.47
  -4 -14   6    6.25    2.31
   3  14  -6   39.04    2.58
  -3 -14   6   40.04    2.57
   2  14  -6    5.81    1.67
   2  14  -6    5.65    2.31
  -2 -14   6    6.48    2.06
   1  14  -6    3.48    2.05
  -1 -14   6    3.50    1.93
   0  14  -6   39.84    2.82
   0 -14   6   43.00    2.84
  -1  14  -6  106.69    3.76
   1 -14   6  108.09    3.54
  -2  14  -6  163.76    3.95
   2 -14   6  166.33    3.65
  -3  14  -6   27.75    2.12
  -4  14  -6   34.33    2.69
  -4  14  -6   35.05    1.66
  -5  14  -6    4.66    0.97
  -5  14  -6    3.78    1.90
  -6  14  -6    2.54    1.70
  -7  14  -6    4.66    1.87
  -7  14  -6    3.84    0.94
  -8  14  -6   -0.22    1.79
  -8  14  -6    0.57    0.93
  -9  14  -6    1.51    2.15
  -9  14  -6    1.19    1.02
 -10  14  -6   19.51    1.38
 -10  14  -6   20.27    2.35
 -11  14  -6    8.40    1.28
 -11  14  -6    7.67    2.33
 -12  14  -6    1.82    1.30
 -12  14  -6    2.23    2.24
 -13  14  -6    6.22    2.63
 -14  14  -6   20.69    1.90
 -15  14  -6    3.77    2.81
 -15  14  -6    5.95    1.71
 -16  14  -6    0.11    1.61
 -16  14  -6    0.32    2.57
 -17  14  -6    3.20    3.17
  11  13  -6   -1.03    4.14
 -11 -13   6    1.29    2.97
  10  13  -6   10.77    3.78
 -10 -13   6   10.82    2.83
   9  13  -6   11.36    3.52
  -9 -13   6    9.57    2.49
   8  13  -6    5.07    3.26
  -8 -13   6    3.86    2.31
   7  13  -6   75.25    3.64
  -7 -13   6   77.72    3.04
   6  13  -6    1.36    2.68
  -6 -13   6   -0.55    2.21
   5  13  -6    4.07    2.59
  -5 -13   6    2.95    2.04
   4  13  -6   29.38    2.60
   3  13  -6    0.99    1.64
   3  13  -6    0.66    2.17
  -3 -13   6    0.55    2.00
   2  13  -6    1.00    1.57
   2  13  -6    0.46    1.95
  -2 -13   6   -0.48    1.90
   1  13  -6    3.01    1.96
   1  13  -6    3.65    1.61
  -1 -13   6    2.41    1.72
   0  13  -6   15.45    1.60
   0  13  -6   16.81    1.97
   0 -13   6   17.62    1.61
  -1  13  -6  441.46    7.44
   1 -13   6  443.05    7.21
  -2  13  -6    1.79    1.37
[truncated: 1,602,651 more chars]
