# Supplementary material for: Unprecedented Fluorescent Dinuclear CoII and ZnII Coordination Compounds with a Symmetric Bis(salamo)-Like Tetraoxime
Source: Molecules. 2018 May 10;23(5):1141. doi: 10.3390/molecules23051141 (PMC6099918; doi:10.3390/molecules23051141)
Supplement: Supplementary file 1 [file molecules-23-01141-s001.zip › Zn coordination compound.cif]

data_20171225lzw122_0m_a_sq
_audit_creation_date               2018-04-21
_audit_creation_method
;
Olex2 1.2
(compiled 2018.04.18 svn.r3501 for OlexSys, GUI svn.r5488)
;
_shelx_SHELXL_version_number       '2014/7'
loop_
  _audit_author_name
  _audit_author_footnote
  _audit_author_address
 'FIRST AUTHORS NAME' 'FIRST AUTHORS FOOTNOTES' 'FIRST AUTHORS ADDRESS'

_audit_contact_author_address      ?
_audit_contact_author_email        ?
_audit_contact_author_fax          '0086 931 4938703'
_audit_contact_author_name         'Wen-Kui Dong'
_audit_contact_author_phone        ?
_publ_contact_author_id_orcid      ?
_publ_requested_journal            test
_publ_section_abstract             Abstract
_publ_section_acknowledgements     acknowledgement
_publ_section_comment              text
_publ_section_exptl_prep           'preparation details'
_publ_section_exptl_refinement
;
    ENTER SPECIAL DETAILS OF THE REFINEMENT 
;
_publ_section_figure_captions      captions
_publ_section_references
;
Dolomanov, O.V., Bourhis, L.J., Gildea, R.J, Howard, J.A.K. & Puschmann, H.
 (2009), J. Appl. Cryst. 42, 339-341.

Sheldrick, G.M. (2015). Acta Cryst. C71, 3-8.

references
;
_publ_section_synopsis             Synopsis
_publ_section_title                Title
_chemical_name_common              ?
_chemical_name_systematic          ?
_chemical_formula_moiety          
 'C32 H30 Br4 N4 O9 Zn2, C31 H30 Br4 N4 O8 Zn2'
_chemical_formula_sum              'C63 H60 Br8 N8 O17 Zn4'
_chemical_formula_weight           2101.95
_chemical_melting_point            ?
loop_
  _atom_type_symbol
  _atom_type_description
  _atom_type_scat_dispersion_real
  _atom_type_scat_dispersion_imag
  _atom_type_scat_source
 'C' 'C' 0.0033 0.0016 'International Tables Vol C Tables 4.2.6.8 and 6.1.1.4'
 'H' 'H' 0.0000 0.0000 'International Tables Vol C Tables 4.2.6.8 and 6.1.1.4'
 'Br' 'Br' -0.2901 2.4595
 'International Tables Vol C Tables 4.2.6.8 and 6.1.1.4'
 'N' 'N' 0.0061 0.0033 'International Tables Vol C Tables 4.2.6.8 and 6.1.1.4'
 'O' 'O' 0.0106 0.0060 'International Tables Vol C Tables 4.2.6.8 and 6.1.1.4'
 'Zn' 'Zn' 0.2839 1.4301 'International Tables Vol C Tables 4.2.6.8 and 6.1.1.4'

_shelx_space_group_comment
;
The symmetry employed for this shelxl refinement is uniquely defined
by the following loop, which should always be used as a source of
symmetry information in preference to the above space-group names.
They are only intended as comments.
;
_space_group_crystal_system        'triclinic'
_space_group_IT_number             2
_space_group_name_H-M_alt          'P -1'
_space_group_name_Hall             '-P 1'
loop_
  _space_group_symop_operation_xyz
 'x, y, z'
 '-x, -y, -z'

_cell_length_a                     13.4501(6)
_cell_length_b                     18.6963(9)
_cell_length_c                     19.6467(8)
_cell_angle_alpha                  72.7450(10)
_cell_angle_beta                   72.5280(10)
_cell_angle_gamma                  88.801(2)
_cell_volume                       4487.9(3)
_cell_formula_units_Z              2
_cell_measurement_reflns_used      9915
_cell_measurement_temperature      296(2)
_cell_measurement_theta_max        27.43
_cell_measurement_theta_min        2.23
_shelx_estimated_absorpt_T_max     0.504
_shelx_estimated_absorpt_T_min     0.426
_exptl_absorpt_coefficient_mu      4.675
_exptl_absorpt_correction_T_max    ?
_exptl_absorpt_correction_T_min    ?
_exptl_absorpt_correction_type     ?
_exptl_absorpt_process_details     ?
_exptl_absorpt_special_details     ?
_exptl_crystal_colour              bright-yellow
_exptl_crystal_density_diffrn      1.555
_exptl_crystal_density_meas        ?
_exptl_crystal_density_method      ?
_exptl_crystal_description         block
_exptl_crystal_F_000               2060
_exptl_crystal_size_max            0.22
_exptl_crystal_size_mid            0.18
_exptl_crystal_size_min            0.17
_exptl_transmission_factor_max     ?
_exptl_transmission_factor_min     ?
_diffrn_reflns_av_R_equivalents    0.0609
_diffrn_reflns_av_unetI/netI       0.0943
_diffrn_reflns_Laue_measured_fraction_full  0.994
_diffrn_reflns_Laue_measured_fraction_max  0.994
_diffrn_reflns_limit_h_max         15
_diffrn_reflns_limit_h_min         -11
_diffrn_reflns_limit_k_max         21
_diffrn_reflns_limit_k_min         -22
_diffrn_reflns_limit_l_max         23
_diffrn_reflns_limit_l_min         -23
_diffrn_reflns_number              32780
_diffrn_reflns_point_group_measured_fraction_full  0.994
_diffrn_reflns_point_group_measured_fraction_max  0.994
_diffrn_reflns_theta_full          25.010
_diffrn_reflns_theta_max           25.010
_diffrn_reflns_theta_min           2.224
_diffrn_ambient_temperature        296.15
_diffrn_detector_area_resol_mean   ?
_diffrn_measured_fraction_theta_full  0.994
_diffrn_measured_fraction_theta_max  0.994
_diffrn_measurement_device_type    'Bruker APEX-II CCD'
_diffrn_measurement_method         '\f and \w scans'
_diffrn_radiation_type             MoK\a
_diffrn_radiation_wavelength       0.71073
_diffrn_source                     ?
_reflns_Friedel_coverage           0.000
_reflns_Friedel_fraction_full      .
_reflns_Friedel_fraction_max       .
_reflns_number_gt                  10738
_reflns_number_total               15711
_reflns_special_details
;
 Reflections were merged by SHELXL according to the crystal
 class for the calculation of statistics and refinement.
 
 Structure factors included contributions from the .fab file.
 
 _reflns_Friedel_fraction is defined as the number of unique
 Friedel pairs measured divided by the number that would be
 possible theoretically, ignoring centric projections and
 systematic absences.
;
_reflns_threshold_expression       'I > 2\s(I)'
_computing_cell_refinement         'Bruker SAINT'
_computing_data_collection         'Bruker APEX2'
_computing_data_reduction          'Bruker SAINT'
_computing_molecular_graphics      'Olex2 (Dolomanov et al., 2009)'
_computing_publication_material    'Olex2 (Dolomanov et al., 2009)'
_computing_structure_refinement    'ShelXL (Sheldrick, 2015)'
_computing_structure_solution      'SHELXT 2014/5 (Sheldrick, 2014)'
_refine_diff_density_max           1.434
_refine_diff_density_min           -0.914
_refine_diff_density_rms           0.148
_refine_ls_extinction_coef         .
_refine_ls_extinction_method       none
_refine_ls_goodness_of_fit_ref     1.049
_refine_ls_hydrogen_treatment      constr
_refine_ls_matrix_type             full
_refine_ls_number_parameters       909
_refine_ls_number_reflns           15711
_refine_ls_number_restraints       0
_refine_ls_R_factor_all            0.0888
_refine_ls_R_factor_gt             0.0523
_refine_ls_restrained_S_all        1.049
_refine_ls_shift/su_max            0.001
_refine_ls_shift/su_mean           0.000
_refine_ls_structure_factor_coef   Fsqd
_refine_ls_weighting_details      
 'w=1/[\s^2^(Fo^2^)+(0.0722P)^2^+1.6057P] where P=(Fo^2^+2Fc^2^)/3'
_refine_ls_weighting_scheme        calc
_refine_ls_wR_factor_gt            0.1353
_refine_ls_wR_factor_ref           0.1557
_refine_special_details            ?
_olex2_refinement_description
;
1. Fixed Uiso
 At 1.2 times of:
  All C(H) groups, All C(H,H) groups
 At 1.5 times of:
  All C(H,H,H) groups
2.a Secondary CH2 refined with riding coordinates:
 C22(H22A,H22B), C23(H23A,H23B), C12(H12A,H12B), C13(H13A,H13B), C45(H45A,
 H45B), C61(H61A,H61B), C46(H46A,H46B), C62(H62A,H62B)
2.b Aromatic/amide H refined with riding coordinates:
 C24(H24), C44(H44), C11(H11), C26(H26), C6(H6), C18(H18), C14(H14), C21(H21),
 C43(H43), C16(H16), C55(H55), C38(H38), C49(H49), C10(H10), C47(H47), C28(H28),
  C42(H42), C51(H51), C57(H57), C60(H60)
2.c Idealised Me refined as rotating group:
 C3(H3A,H3B,H3C), C1(H1A,H1B,H1C), C2(H2A,H2B,H2C), C32(H32A,H32B,H32C),
 C63(H63A,H63B,H63C), C34(H34A,H34B,H34C), C35(H35A,H35B,H35C), C33(H33A,H33B,
 H33C)
;
_atom_sites_solution_hydrogens     geom
_atom_sites_solution_primary       ?
_atom_sites_solution_secondary     ?
loop_
  _atom_site_label
  _atom_site_type_symbol
  _atom_site_fract_x
  _atom_site_fract_y
  _atom_site_fract_z
  _atom_site_U_iso_or_equiv
  _atom_site_adp_type
  _atom_site_occupancy
  _atom_site_site_symmetry_order
  _atom_site_calc_flag
  _atom_site_refinement_flags_posn
  _atom_site_refinement_flags_adp
  _atom_site_refinement_flags_occupancy
  _atom_site_disorder_assembly
  _atom_site_disorder_group
 Br4 Br 0.49099(5) 0.43086(4) -0.09653(4) 0.03069(18) Uani 1 1 d . . . . .
 Br6 Br 0.62071(6) 0.52897(4) 0.31950(4) 0.03512(19) Uani 1 1 d . . . . .
 Br3 Br 0.16812(6) 0.57250(4) -0.20436(4) 0.0377(2) Uani 1 1 d . . . . .
 Zn3 Zn 0.35144(6) 0.13228(4) 0.03017(4) 0.02242(18) Uani 1 1 d . . . . .
 Zn1 Zn 0.30070(6) 0.43488(4) 0.29543(4) 0.02424(19) Uani 1 1 d . . . . .
 Zn4 Zn 0.24213(6) 0.25332(4) 0.10407(4) 0.02299(18) Uani 1 1 d . . . . .
 Zn2 Zn 0.34347(6) 0.29272(4) 0.40743(4) 0.02558(19) Uani 1 1 d . . . . .
 Br5 Br 0.43466(7) 0.79738(4) 0.34640(4) 0.0464(2) Uani 1 1 d . . . . .
 Br7 Br 0.15961(7) 0.06329(5) 0.41989(4) 0.0471(2) Uani 1 1 d . . . . .
 Br2 Br -0.00618(6) 0.14207(5) 0.07459(4) 0.0462(2) Uani 1 1 d . . . . .
 Br1 Br 0.04440(7) 0.36148(5) -0.20441(4) 0.0485(2) Uani 1 1 d . . . . .
 Br8 Br 0.02198(7) -0.01594(5) 0.73506(4) 0.0513(2) Uani 1 1 d . . . . .
 O4 O 0.3587(3) 0.1779(2) 0.1114(2) 0.0227(10) Uani 1 1 d . . . . .
 O17 O 0.4162(3) 0.4946(2) 0.2981(2) 0.0266(11) Uani 1 1 d . . . . .
 O14 O 0.3829(3) 0.3396(2) 0.2931(2) 0.0220(10) Uani 1 1 d . . . . .
 O9 O 0.3116(3) 0.3472(3) 0.0316(2) 0.0264(11) Uani 1 1 d . . . . .
 O3 O 0.2200(3) 0.1914(2) 0.0402(2) 0.0229(10) Uani 1 1 d . . . . .
 O2 O 0.5238(3) 0.2337(3) -0.1014(2) 0.0277(11) Uani 1 1 d . . . . .
 O15 O 0.2411(3) 0.3710(3) 0.4004(2) 0.0279(11) Uani 1 1 d . . . . .
 O7 O 0.2665(4) 0.0264(3) 0.1101(3) 0.0337(12) Uani 1 1 d . . . . .
 O16 O 0.2743(4) 0.1930(3) 0.4348(2) 0.0338(12) Uani 1 1 d . . . . .
 O8 O 0.2799(4) 0.0582(3) -0.0090(2) 0.0308(11) Uani 1 1 d . . . . .
 O6 O -0.0021(4) 0.2812(3) 0.1651(3) 0.0367(13) Uani 1 1 d . . . . .
 O5 O 0.1448(4) 0.2787(3) 0.2510(2) 0.0329(12) Uani 1 1 d . . . . .
 O12 O 0.2415(4) 0.4818(3) 0.1509(3) 0.0358(12) Uani 1 1 d . . . . .
 O1 O 0.5710(4) 0.0758(3) -0.0292(2) 0.0303(12) Uani 1 1 d . . . . .
 O11 O 0.5500(4) 0.2696(3) 0.4400(2) 0.0347(12) Uani 1 1 d . . . . .
 O10 O 0.3807(4) 0.3243(3) 0.5458(3) 0.0399(14) Uani 1 1 d . . . . .
 N6 N 0.4137(4) 0.2195(3) -0.0716(3) 0.0253(13) Uani 1 1 d . . . . .
 N5 N 0.5021(4) 0.0988(3) 0.0289(3) 0.0224(12) Uani 1 1 d . . . . .
 O13 O 0.1110(4) 0.5288(3) 0.2786(3) 0.0415(14) Uani 1 1 d . . . . .
 N8 N 0.2236(4) 0.2378(3) 0.2141(3) 0.0249(13) Uani 1 1 d . . . . .
 N1 N 0.2126(4) 0.5286(3) 0.2865(3) 0.0291(14) Uani 1 1 d . . . . .
 N7 N 0.0961(4) 0.3075(3) 0.1089(3) 0.0278(13) Uani 1 1 d . . . . .
 N2 N 0.2982(4) 0.4285(3) 0.1910(3) 0.0236(12) Uani 1 1 d . . . . .
 N3 N 0.5068(4) 0.2896(3) 0.3795(3) 0.0276(13) Uani 1 1 d . . . . .
 N4 N 0.3350(5) 0.2736(3) 0.5205(3) 0.0305(14) Uani 1 1 d . . . . .
 C39 C 0.4549(5) 0.3624(4) 0.1627(3) 0.0219(14) Uani 1 1 d . . . . .
 C24 C 0.3663(5) 0.2691(4) -0.1076(3) 0.0233(15) Uani 1 1 d . . . . .
 H24 H 0.4058 0.3082 -0.1480 0.028 Uiso 1 1 calc R . . . .
 C20 C 0.2762(5) 0.3960(4) -0.0173(3) 0.0205(14) Uani 1 1 d . . . . .
 C41 C 0.5551(5) 0.3053(4) 0.2460(3) 0.0246(15) Uani 1 1 d . . . . .
 C40 C 0.4617(5) 0.3353(4) 0.2362(4) 0.0221(15) Uani 1 1 d . . . . .
 C44 C 0.3716(5) 0.4065(4) 0.1450(4) 0.0241(15) Uani 1 1 d . . . . .
 H44 H 0.3713 0.4200 0.0955 0.029 Uiso 1 1 calc R . . . .
 C59 C 0.4176(5) 0.5606(4) 0.3050(3) 0.0238(15) Uani 1 1 d . . . . .
 C30 C 0.1847(5) 0.2229(4) -0.0174(3) 0.0247(15) Uani 1 1 d . . . . .
 C15 C 0.1679(5) 0.4061(4) -0.0079(3) 0.0240(15) Uani 1 1 d . . . . .
 C25 C 0.2520(5) 0.2671(4) -0.0881(3) 0.0228(15) Uani 1 1 d . . . . .
 C9 C 0.4865(5) 0.1019(4) 0.1549(3) 0.0228(15) Uani 1 1 d . . . . .
 C8 C 0.4023(5) 0.1495(3) 0.1644(3) 0.0192(14) Uani 1 1 d . . . . .
 C11 C 0.2805(5) 0.2081(4) 0.2548(3) 0.0240(15) Uani 1 1 d . . . . .
 H11 H 0.2643 0.2150 0.3018 0.029 Uiso 1 1 calc R . . . .
 C37 C 0.6264(5) 0.3184(4) 0.1127(4) 0.0268(16) Uani 1 1 d . . . . .
 C54 C 0.5075(5) 0.5909(4) 0.3164(3) 0.0256(16) Uani 1 1 d . . . . .
 C7 C 0.3687(5) 0.1643(4) 0.2341(3) 0.0212(14) Uani 1 1 d . . . . .
 C17 C 0.2104(6) 0.5013(4) -0.1272(4) 0.0276(16) Uani 1 1 d . . . . .
 C26 C 0.2103(5) 0.3080(4) -0.1435(4) 0.0279(16) Uani 1 1 d . . . . .
 H26 H 0.2541 0.3387 -0.1888 0.033 Uiso 1 1 calc R . . . .
 C6 C 0.4177(5) 0.1338(4) 0.2900(3) 0.0249(15) Uani 1 1 d . . . . .
 H6 H 0.3944 0.1453 0.3349 0.030 Uiso 1 1 calc R . . . .
 C18 C 0.3175(6) 0.4954(4) -0.1377(4) 0.0284(16) Uani 1 1 d . . . . .
 H18 H 0.3673 0.5254 -0.1803 0.034 Uiso 1 1 calc R . . . .
 C14 C 0.0857(5) 0.3644(4) 0.0571(3) 0.0273(16) Uani 1 1 d . . . . .
 H14 H 0.0186 0.3803 0.0619 0.033 Uiso 1 1 calc R . . . .
 C56 C 0.4278(6) 0.7024(4) 0.3287(4) 0.0325(18) Uani 1 1 d . . . . .
 C19 C 0.3455(5) 0.4437(4) -0.0825(4) 0.0229(15) Uani 1 1 d . . . . .
 C27 C 0.1036(6) 0.3030(4) -0.1309(4) 0.0319(18) Uani 1 1 d . . . . .
 C29 C 0.0798(5) 0.2144(4) -0.0128(3) 0.0292(17) Uani 1 1 d . . . . .
 C21 C 0.5354(5) 0.0841(4) 0.0857(3) 0.0246(15) Uani 1 1 d . . . . .
 H21 H 0.5968 0.0597 0.0824 0.030 Uiso 1 1 calc R . . . .
 C52 C 0.1618(5) 0.0831(4) 0.5081(4) 0.0282(16) Uani 1 1 d . . . . .
 C43 C 0.5752(5) 0.2868(4) 0.3174(4) 0.0269(16) Uani 1 1 d . . . . .
 H43 H 0.6411 0.2719 0.3191 0.032 Uiso 1 1 calc R . . . .
 C16 C 0.1377(5) 0.4590(4) -0.0639(4) 0.0267(16) Uani 1 1 d . . . . .
 H16 H 0.0671 0.4653 -0.0578 0.032 Uiso 1 1 calc R . . . .
 C55 C 0.5134(6) 0.6585(4) 0.3282(3) 0.0313(17) Uani 1 1 d . . . . .
 H55 H 0.5727 0.6751 0.3358 0.038 Uiso 1 1 calc R . . . .
 C31 C 0.2428(5) 0.0133(4) 0.0563(4) 0.0311(17) Uani 1 1 d . . . . .
 C22 C 0.5389(5) 0.0984(4) -0.0953(3) 0.0248(15) Uani 1 1 d . . . . .
 H22A H 0.4636 0.0893 -0.0810 0.030 Uiso 1 1 calc R . . . .
 H22B H 0.5704 0.0677 -0.1270 0.030 Uiso 1 1 calc R . . . .
 C53 C 0.2220(5) 0.1480(4) 0.5010(4) 0.0285(16) Uani 1 1 d . . . . .
 C38 C 0.5364(5) 0.3519(4) 0.1031(4) 0.0267(16) Uani 1 1 d . . . . .
 H38 H 0.5298 0.3679 0.0552 0.032 Uiso 1 1 calc R . . . .
 C49 C 0.1648(6) 0.1086(4) 0.6385(4) 0.0337(18) Uani 1 1 d . . . . .
 H49 H 0.1659 0.1158 0.6831 0.040 Uiso 1 1 calc R . . . .
 C5 C 0.4977(6) 0.0881(4) 0.2803(4) 0.0310(17) Uani 1 1 d . . . . .
 C10 C 0.5303(5) 0.0730(4) 0.2121(4) 0.0292(16) Uani 1 1 d . . . . .
 H10 H 0.5846 0.0419 0.2044 0.035 Uiso 1 1 calc R . . . .
 C47 C 0.2818(6) 0.2195(4) 0.5759(4) 0.0333(18) Uani 1 1 d . . . . .
 H47 H 0.2807 0.2190 0.6236 0.040 Uiso 1 1 calc R . . . .
 C48 C 0.2235(6) 0.1593(4) 0.5701(4) 0.0312(17) Uani 1 1 d . . . . .
 C28 C 0.0387(5) 0.2542(4) -0.0675(4) 0.0312(17) Uani 1 1 d . . . . .
 H28 H -0.0322 0.2479 -0.0614 0.037 Uiso 1 1 calc R . . . .
 C42 C 0.6341(5) 0.2978(4) 0.1848(4) 0.0293(16) Uani 1 1 d . . . . .
 H42 H 0.6954 0.2781 0.1924 0.035 Uiso 1 1 calc R . . . .
 C51 C 0.1038(6) 0.0347(4) 0.5757(4) 0.0360(18) Uani 1 1 d . . . . .
 H51 H 0.0640 -0.0065 0.5778 0.043 Uiso 1 1 calc R . . . .
 C36 C 0.7153(6) 0.3063(4) 0.0465(4) 0.0342(18) Uani 1 1 d . . . . .
 C50 C 0.1059(6) 0.0486(4) 0.6408(4) 0.0329(18) Uani 1 1 d . . . . .
 C23 C 0.5690(6) 0.1806(4) -0.1397(4) 0.0325(17) Uani 1 1 d . . . . .
 H23A H 0.6445 0.1888 -0.1548 0.039 Uiso 1 1 calc R . . . .
 H23B H 0.5489 0.1909 -0.1849 0.039 Uiso 1 1 calc R . . . .
 C12 C 0.0464(5) 0.2369(4) 0.2803(4) 0.0372(19) Uani 1 1 d . . . . .
 H12A H -0.0049 0.2657 0.3050 0.045 Uiso 1 1 calc R . . . .
 H12B H 0.0510 0.1909 0.3180 0.045 Uiso 1 1 calc R . . . .
 C13 C 0.0075(6) 0.2167(4) 0.2235(4) 0.0364(19) Uani 1 1 d . . . . .
 H13A H 0.0554 0.1843 0.2015 0.044 Uiso 1 1 calc R . . . .
 H13B H -0.0601 0.1888 0.2488 0.044 Uiso 1 1 calc R . . . .
 C57 C 0.3432(6) 0.6802(4) 0.3151(4) 0.0342(18) Uani 1 1 d . . . . .
 H57 H 0.2889 0.7116 0.3137 0.041 Uiso 1 1 calc R . . . .
 C58 C 0.3353(6) 0.6101(4) 0.3030(4) 0.0288(16) Uani 1 1 d . . . . .
 C45 C 0.5613(6) 0.3349(4) 0.4627(4) 0.0377(19) Uani 1 1 d . . . . .
 H45A H 0.6129 0.3709 0.4221 0.045 Uiso 1 1 calc R . . . .
 H45B H 0.5879 0.3200 0.5052 0.045 Uiso 1 1 calc R . . . .
 C61 C 0.0879(6) 0.4618(5) 0.2634(4) 0.0400(19) Uani 1 1 d . . . . .
 H61A H 0.0126 0.4521 0.2787 0.048 Uiso 1 1 calc R . . . .
 H61B H 0.1152 0.4199 0.2935 0.048 Uiso 1 1 calc R . . . .
 C46 C 0.4627(6) 0.3727(4) 0.4837(4) 0.0357(18) Uani 1 1 d . . . . .
 H46A H 0.4779 0.4164 0.4969 0.043 Uiso 1 1 calc R . . . .
 H46B H 0.4377 0.3900 0.4405 0.043 Uiso 1 1 calc R . . . .
 C60 C 0.2388(6) 0.5917(4) 0.2909(4) 0.0361(18) Uani 1 1 d . . . . .
 H60 H 0.1923 0.6290 0.2860 0.043 Uiso 1 1 calc R . . . .
 C62 C 0.1320(6) 0.4656(4) 0.1830(4) 0.0391(19) Uani 1 1 d . . . . .
 H62A H 0.1143 0.4178 0.1779 0.047 Uiso 1 1 calc R . . . .
 H62B H 0.0980 0.5036 0.1541 0.047 Uiso 1 1 calc R . . . .
 C3 C 0.5034(7) 0.0786(4) 0.4109(4) 0.044(2) Uani 1 1 d . . . . .
 H3A H 0.5093 0.1325 0.3969 0.065 Uiso 1 1 calc GR . . . .
 H3B H 0.5406 0.0584 0.4463 0.065 Uiso 1 1 calc GR . . . .
 H3C H 0.4310 0.0607 0.4332 0.065 Uiso 1 1 calc GR . . . .
 C4 C 0.5502(6) 0.0534(4) 0.3408(4) 0.0361(19) Uani 1 1 d . . . . .
 C1 C 0.6683(6) 0.0798(5) 0.3105(4) 0.051(2) Uani 1 1 d . . . . .
 H1A H 0.7001 0.0666 0.2655 0.076 Uiso 1 1 calc GR . . . .
 H1B H 0.7015 0.0557 0.3474 0.076 Uiso 1 1 calc GR . . . .
 H1C H 0.6764 0.1332 0.2997 0.076 Uiso 1 1 calc GR . . . .
 C2 C 0.5370(7) -0.0321(4) 0.3635(4) 0.047(2) Uani 1 1 d . . . . .
 H2A H 0.4643 -0.0480 0.3777 0.071 Uiso 1 1 calc GR . . . .
 H2B H 0.5631 -0.0533 0.4051 0.071 Uiso 1 1 calc GR . . . .
 H2C H 0.5753 -0.0489 0.3220 0.071 Uiso 1 1 calc GR . . . .
 C32 C 0.1714(7) -0.0537(5) 0.0721(4) 0.048(2) Uani 1 1 d . . . . .
 H32A H 0.1194 -0.0392 0.0471 0.071 Uiso 1 1 calc GR . . . .
 H32B H 0.1378 -0.0736 0.1251 0.071 Uiso 1 1 calc GR . . . .
 H32C H 0.2110 -0.0913 0.0542 0.071 Uiso 1 1 calc GR . . . .
 C63 C 0.1336(8) 0.3469(7) 0.4367(5) 0.091(4) Uani 1 1 d . . . . .
 H63A H 0.0922 0.3890 0.4273 0.136 Uiso 1 1 calc GR . . . .
 H63B H 0.1216 0.3262 0.4896 0.136 Uiso 1 1 calc GR . . . .
 H63C H 0.1145 0.3094 0.4176 0.136 Uiso 1 1 calc GR . . . .
 C34 C 0.6872(9) 0.3241(9) -0.0251(6) 0.124(6) Uani 1 1 d . . . . .
 H34A H 0.6792 0.3769 -0.0425 0.187 Uiso 1 1 calc GR . . . .
 H34B H 0.6228 0.2964 -0.0160 0.187 Uiso 1 1 calc GR . . . .
 H34C H 0.7418 0.3103 -0.0623 0.187 Uiso 1 1 calc GR . . . .
 C35 C 0.7387(8) 0.2241(5) 0.0658(6) 0.080(4) Uani 1 1 d . . . . .
 H35A H 0.7928 0.2160 0.0246 0.119 Uiso 1 1 calc GR . . . .
 H35B H 0.6767 0.1934 0.0754 0.119 Uiso 1 1 calc GR . . . .
 H35C H 0.7613 0.2109 0.1096 0.119 Uiso 1 1 calc GR . . . .
 C33 C 0.8134(8) 0.3549(6) 0.0324(6) 0.088(4) Uani 1 1 d . . . . .
 H33A H 0.8712 0.3410 -0.0026 0.132 Uiso 1 1 calc GR . . . .
 H33B H 0.8283 0.3475 0.0787 0.132 Uiso 1 1 calc GR . . . .
 H33C H 0.8024 0.4068 0.0121 0.132 Uiso 1 1 calc GR . . . .

loop_
  _atom_site_aniso_label
  _atom_site_aniso_U_11
  _atom_site_aniso_U_22
  _atom_site_aniso_U_33
  _atom_site_aniso_U_23
  _atom_site_aniso_U_13
  _atom_site_aniso_U_12
 Br4 0.0286(4) 0.0281(4) 0.0321(4) -0.0018(3) -0.0119(3) 0.0007(3)
 Br6 0.0346(4) 0.0336(5) 0.0375(4) -0.0053(3) -0.0168(3) -0.0021(3)
 Br3 0.0464(5) 0.0296(5) 0.0398(4) -0.0015(3) -0.0265(4) 0.0083(3)
 Zn3 0.0285(4) 0.0205(4) 0.0196(4) -0.0065(3) -0.0093(3) 0.0069(3)
 Zn1 0.0273(4) 0.0205(5) 0.0279(4) -0.0082(3) -0.0121(4) 0.0051(3)
 Zn4 0.0285(4) 0.0198(4) 0.0199(4) -0.0047(3) -0.0080(3) 0.0071(3)
 Zn2 0.0336(5) 0.0212(5) 0.0228(4) -0.0049(3) -0.0116(4) -0.0002(3)
 Br5 0.0786(6) 0.0247(5) 0.0403(4) -0.0133(3) -0.0210(4) -0.0031(4)
 Br7 0.0655(6) 0.0434(5) 0.0310(4) -0.0151(3) -0.0074(4) -0.0230(4)
 Br2 0.0324(4) 0.0503(6) 0.0422(4) 0.0067(4) -0.0117(4) -0.0022(4)
 Br1 0.0639(6) 0.0459(6) 0.0435(4) -0.0062(4) -0.0361(4) 0.0185(4)
 Br8 0.0661(6) 0.0444(6) 0.0290(4) 0.0054(3) -0.0086(4) -0.0208(4)
 O4 0.030(3) 0.024(3) 0.019(2) -0.0087(19) -0.012(2) 0.007(2)
 O17 0.031(3) 0.016(3) 0.035(3) -0.009(2) -0.013(2) 0.004(2)
 O14 0.020(2) 0.023(3) 0.021(2) -0.0048(18) -0.006(2) 0.0023(19)
 O9 0.033(3) 0.021(3) 0.026(2) -0.0036(19) -0.014(2) 0.004(2)
 O3 0.033(3) 0.018(3) 0.021(2) -0.0039(18) -0.016(2) 0.009(2)
 O2 0.026(3) 0.026(3) 0.030(2) -0.010(2) -0.006(2) 0.001(2)
 O15 0.023(3) 0.032(3) 0.022(2) -0.005(2) -0.001(2) 0.002(2)
 O7 0.042(3) 0.028(3) 0.032(3) -0.009(2) -0.012(2) 0.004(2)
 O16 0.048(3) 0.026(3) 0.023(2) -0.005(2) -0.006(2) -0.013(2)
 O8 0.039(3) 0.029(3) 0.023(2) -0.006(2) -0.011(2) 0.002(2)
 O6 0.023(3) 0.039(3) 0.036(3) -0.005(2) 0.002(2) 0.007(2)
 O5 0.042(3) 0.030(3) 0.026(2) -0.011(2) -0.008(2) 0.016(2)
 O12 0.042(3) 0.033(3) 0.038(3) -0.006(2) -0.025(2) 0.014(2)
 O1 0.039(3) 0.030(3) 0.025(2) -0.013(2) -0.011(2) 0.019(2)
 O11 0.046(3) 0.028(3) 0.032(3) -0.002(2) -0.023(2) 0.004(2)
 O10 0.063(4) 0.030(3) 0.035(3) -0.011(2) -0.025(3) -0.017(3)
 N6 0.024(3) 0.027(4) 0.021(3) -0.007(2) -0.001(3) 0.003(3)
 N5 0.025(3) 0.022(3) 0.018(3) -0.007(2) -0.002(2) 0.003(2)
 O13 0.038(3) 0.045(4) 0.063(3) -0.035(3) -0.030(3) 0.024(3)
 N8 0.026(3) 0.025(3) 0.021(3) -0.009(2) -0.002(3) 0.006(3)
 N1 0.029(3) 0.032(4) 0.036(3) -0.017(3) -0.017(3) 0.010(3)
 N7 0.029(3) 0.025(4) 0.030(3) -0.009(3) -0.010(3) 0.009(3)
 N2 0.025(3) 0.021(3) 0.032(3) -0.009(2) -0.017(3) 0.005(2)
 N3 0.027(3) 0.030(4) 0.027(3) -0.003(2) -0.015(3) 0.000(3)
 N4 0.044(4) 0.022(4) 0.029(3) -0.009(3) -0.015(3) -0.001(3)
 C39 0.018(3) 0.016(4) 0.030(3) -0.007(3) -0.005(3) 0.000(3)
 C24 0.034(4) 0.021(4) 0.014(3) -0.005(3) -0.006(3) 0.003(3)
 C20 0.024(4) 0.018(4) 0.023(3) -0.006(3) -0.012(3) 0.004(3)
 C41 0.025(4) 0.022(4) 0.026(3) -0.004(3) -0.009(3) -0.001(3)
 C40 0.024(4) 0.011(4) 0.032(4) -0.003(3) -0.012(3) 0.000(3)
 C44 0.027(4) 0.022(4) 0.028(3) -0.007(3) -0.015(3) 0.000(3)
 C59 0.024(4) 0.023(4) 0.022(3) -0.003(3) -0.007(3) -0.005(3)
 C30 0.030(4) 0.018(4) 0.024(3) -0.008(3) -0.003(3) 0.010(3)
 C15 0.029(4) 0.021(4) 0.024(3) -0.011(3) -0.008(3) 0.010(3)
 C25 0.031(4) 0.017(4) 0.021(3) -0.006(3) -0.009(3) 0.004(3)
 C9 0.027(4) 0.018(4) 0.026(3) -0.006(3) -0.012(3) 0.003(3)
 C8 0.022(4) 0.015(4) 0.019(3) -0.005(3) -0.004(3) 0.003(3)
 C11 0.031(4) 0.020(4) 0.018(3) -0.006(3) -0.003(3) 0.001(3)
 C37 0.020(4) 0.027(4) 0.027(4) -0.006(3) -0.002(3) 0.003(3)
 C54 0.043(4) 0.020(4) 0.016(3) -0.001(3) -0.017(3) 0.000(3)
 C7 0.030(4) 0.016(4) 0.016(3) -0.002(3) -0.009(3) 0.002(3)
 C17 0.043(4) 0.019(4) 0.026(3) -0.007(3) -0.018(3) 0.014(3)
 C26 0.035(4) 0.027(4) 0.022(3) -0.008(3) -0.010(3) 0.001(3)
 C6 0.034(4) 0.018(4) 0.025(3) -0.009(3) -0.010(3) -0.004(3)
 C18 0.039(4) 0.020(4) 0.027(3) -0.006(3) -0.013(3) 0.004(3)
 C14 0.028(4) 0.031(4) 0.023(3) -0.011(3) -0.006(3) 0.007(3)
 C56 0.055(5) 0.018(4) 0.023(3) -0.007(3) -0.009(4) -0.010(4)
 C19 0.021(4) 0.020(4) 0.031(3) -0.009(3) -0.012(3) 0.002(3)
 C27 0.047(5) 0.034(5) 0.028(4) -0.013(3) -0.027(4) 0.018(4)
 C29 0.036(4) 0.029(4) 0.021(3) -0.008(3) -0.006(3) 0.006(3)
 C21 0.026(4) 0.018(4) 0.032(4) -0.008(3) -0.013(3) 0.006(3)
 C52 0.034(4) 0.027(4) 0.025(3) -0.011(3) -0.009(3) 0.001(3)
 C43 0.029(4) 0.014(4) 0.036(4) -0.001(3) -0.013(3) -0.001(3)
 C16 0.032(4) 0.020(4) 0.037(4) -0.013(3) -0.021(3) 0.010(3)
 C55 0.037(4) 0.032(5) 0.024(3) -0.005(3) -0.011(3) -0.011(3)
 C31 0.029(4) 0.028(4) 0.036(4) -0.010(3) -0.010(3) 0.010(3)
 C22 0.030(4) 0.029(4) 0.017(3) -0.010(3) -0.006(3) 0.005(3)
 C53 0.032(4) 0.024(4) 0.030(4) -0.008(3) -0.011(3) 0.000(3)
 C38 0.032(4) 0.024(4) 0.025(3) -0.006(3) -0.012(3) 0.000(3)
 C49 0.042(5) 0.033(5) 0.024(3) -0.005(3) -0.010(3) -0.001(4)
 C5 0.048(5) 0.022(4) 0.031(4) -0.007(3) -0.024(4) 0.005(3)
 C10 0.033(4) 0.021(4) 0.036(4) -0.008(3) -0.016(3) 0.010(3)
 C47 0.052(5) 0.025(4) 0.024(3) -0.007(3) -0.014(4) 0.000(4)
 C48 0.033(4) 0.029(4) 0.026(3) -0.002(3) -0.007(3) -0.003(3)
 C28 0.028(4) 0.038(5) 0.031(4) -0.012(3) -0.013(3) 0.010(3)
 C42 0.030(4) 0.021(4) 0.041(4) -0.006(3) -0.020(3) 0.008(3)
 C51 0.046(5) 0.022(4) 0.040(4) -0.008(3) -0.013(4) -0.006(3)
 C36 0.031(4) 0.040(5) 0.034(4) -0.015(3) -0.010(3) 0.009(4)
 C50 0.029(4) 0.034(5) 0.021(3) 0.005(3) 0.002(3) -0.007(3)
 C23 0.034(4) 0.036(5) 0.025(3) -0.008(3) -0.007(3) 0.007(3)
 C12 0.026(4) 0.041(5) 0.029(4) -0.003(3) 0.006(3) 0.007(4)
 C13 0.027(4) 0.026(4) 0.038(4) 0.005(3) 0.002(3) -0.001(3)
 C57 0.056(5) 0.020(4) 0.034(4) -0.011(3) -0.021(4) 0.012(4)
 C58 0.047(5) 0.016(4) 0.028(3) -0.008(3) -0.018(3) 0.009(3)
 C45 0.050(5) 0.031(5) 0.039(4) -0.010(3) -0.023(4) -0.007(4)
 C61 0.021(4) 0.045(5) 0.064(5) -0.025(4) -0.020(4) 0.005(4)
 C46 0.051(5) 0.021(4) 0.040(4) -0.006(3) -0.023(4) -0.011(4)
 C60 0.046(5) 0.033(5) 0.045(4) -0.020(4) -0.030(4) 0.014(4)
 C62 0.043(5) 0.031(5) 0.061(5) -0.022(4) -0.033(4) 0.016(4)
 C3 0.084(6) 0.025(5) 0.040(4) -0.014(3) -0.042(4) 0.014(4)
 C4 0.063(5) 0.025(4) 0.032(4) -0.009(3) -0.031(4) 0.015(4)
 C1 0.055(6) 0.066(7) 0.043(5) -0.019(4) -0.032(4) 0.014(5)
 C2 0.090(7) 0.024(5) 0.046(4) -0.011(4) -0.049(5) 0.017(4)
 C32 0.056(6) 0.040(5) 0.046(5) -0.011(4) -0.017(4) -0.004(4)
 C63 0.062(7) 0.121(11) 0.054(6) 0.009(6) -0.003(6) 0.014(7)
 C34 0.081(8) 0.271(19) 0.061(7) -0.101(10) -0.035(7) 0.101(10)
 C35 0.059(7) 0.041(6) 0.102(8) -0.015(6) 0.022(6) 0.011(5)
 C33 0.075(8) 0.086(9) 0.095(8) -0.067(7) 0.028(7) -0.027(6)

_geom_special_details
;
 All esds (except the esd in the dihedral angle between two l.s. planes)
 are estimated using the full covariance matrix.  The cell esds are taken
 into account individually in the estimation of esds in distances, angles
 and torsion angles; correlations between esds in cell parameters are only
 used when they are defined by crystal symmetry.  An approximate (isotropic)
 treatment of cell esds is used for estimating esds involving l.s. planes.
;
loop_
  _geom_bond_atom_site_label_1
  _geom_bond_atom_site_label_2
  _geom_bond_distance
  _geom_bond_site_symmetry_2
  _geom_bond_publ_flag
 Br4 C19 1.912(6) . ?
 Br6 C54 1.898(7) . ?
 Br3 C17 1.918(6) . ?
 Zn3 Zn4 3.1495(10) . ?
 Zn3 O4 2.047(4) . ?
 Zn3 O3 2.056(4) . ?
 Zn3 O7 2.205(5) . ?
 Zn3 O8 2.138(5) . ?
 Zn3 N6 2.115(5) . ?
 Zn3 N5 2.103(5) . ?
 Zn3 C31 2.521(8) . ?
 Zn1 Zn2 3.0763(11) . ?
 Zn1 O17 1.954(5) . ?
 Zn1 O14 2.082(4) . ?
 Zn1 O15 1.978(4) . ?
 Zn1 N1 2.088(6) . ?
 Zn1 N2 2.101(5) . ?
 Zn4 O4 2.096(4) . ?
 Zn4 O9 1.941(4) . ?
 Zn4 O3 2.027(4) . ?
 Zn4 N8 2.031(5) . ?
 Zn4 N7 2.180(5) . ?
 Zn2 O14 2.057(4) . ?
 Zn2 O15 1.991(5) . ?
 Zn2 O16 1.951(5) . ?
 Zn2 N3 2.103(6) . ?
 Zn2 N4 2.111(5) . ?
 Br5 C56 1.917(7) . ?
 Br7 C52 1.885(6) . ?
 Br2 C29 1.900(7) . ?
 Br1 C27 1.906(6) . ?
 Br8 C50 1.907(6) . ?
 O4 C8 1.318(7) . ?
 O17 C59 1.283(8) . ?
 O14 C40 1.310(7) . ?
 O9 C20 1.310(7) . ?
 O3 C30 1.329(7) . ?
 O2 N6 1.418(7) . ?
 O2 C23 1.437(8) . ?
 O15 C63 1.421(10) . ?
 O7 C31 1.279(8) . ?
 O16 C53 1.312(8) . ?
 O8 C31 1.263(8) . ?
 O6 N7 1.426(7) . ?
 O6 C13 1.432(8) . ?
 O5 N8 1.438(7) . ?
 O5 C12 1.418(8) . ?
 O12 N2 1.435(7) . ?
 O12 C62 1.415(9) . ?
 O1 N5 1.410(6) . ?
 O1 C22 1.433(7) . ?
 O11 N3 1.425(7) . ?
 O11 C45 1.444(8) . ?
 O10 N4 1.416(7) . ?
 O10 C46 1.450(8) . ?
 N6 C24 1.275(8) . ?
 N5 C21 1.278(8) . ?
 O13 N1 1.420(7) . ?
 O13 C61 1.432(9) . ?
 N8 C11 1.274(8) . ?
 N1 C60 1.273(9) . ?
 N7 C14 1.275(8) . ?
 N2 C44 1.276(8) . ?
 N3 C43 1.304(8) . ?
 N4 C47 1.276(8) . ?
 C39 C40 1.410(9) . ?
 C39 C44 1.443(9) . ?
 C39 C38 1.403(9) . ?
 C24 H24 0.9300 . ?
 C24 C25 1.466(9) . ?
 C20 C15 1.428(9) . ?
 C20 C19 1.394(9) . ?
 C41 C40 1.409(9) . ?
 C41 C43 1.448(9) . ?
 C41 C42 1.386(9) . ?
 C44 H44 0.9300 . ?
 C59 C54 1.449(9) . ?
 C59 C58 1.430(9) . ?
 C30 C25 1.424(9) . ?
 C30 C29 1.397(9) . ?
 C15 C14 1.436(9) . ?
 C15 C16 1.401(9) . ?
 C25 C26 1.392(9) . ?
 C9 C8 1.426(9) . ?
 C9 C21 1.454(9) . ?
 C9 C10 1.389(9) . ?
 C8 C7 1.416(8) . ?
 C11 H11 0.9300 . ?
 C11 C7 1.453(9) . ?
 C37 C38 1.389(9) . ?
 C37 C42 1.389(9) . ?
 C37 C36 1.549(9) . ?
 C54 C55 1.359(10) . ?
 C7 C6 1.419(9) . ?
 C17 C18 1.399(9) . ?
 C17 C16 1.359(9) . ?
 C26 H26 0.9300 . ?
 C26 C27 1.381(10) . ?
 C6 H6 0.9300 . ?
 C6 C5 1.363(10) . ?
 C18 H18 0.9300 . ?
 C18 C19 1.364(9) . ?
 C14 H14 0.9300 . ?
 C56 C55 1.399(11) . ?
 C56 C57 1.343(10) . ?
 C27 C28 1.361(10) . ?
 C29 C28 1.371(9) . ?
 C21 H21 0.9300 . ?
 C52 C53 1.423(10) . ?
 C52 C51 1.374(9) . ?
 C43 H43 0.9300 . ?
 C16 H16 0.9300 . ?
 C55 H55 0.9300 . ?
 C31 C32 1.492(10) . ?
 C22 H22A 0.9700 . ?
 C22 H22B 0.9700 . ?
 C22 C23 1.519(9) . ?
 C53 C48 1.438(9) . ?
 C38 H38 0.9300 . ?
 C49 H49 0.9300 . ?
 C49 C48 1.403(9) . ?
 C49 C50 1.368(10) . ?
 C5 C10 1.390(9) . ?
 C5 C4 1.536(9) . ?
 C10 H10 0.9300 . ?
 C47 H47 0.9300 . ?
 C47 C48 1.436(10) . ?
 C28 H28 0.9300 . ?
 C42 H42 0.9300 . ?
 C51 H51 0.9300 . ?
 C51 C50 1.388(10) . ?
 C36 C34 1.504(11) . ?
 C36 C35 1.521(11) . ?
 C36 C33 1.525(12) . ?
 C23 H23A 0.9700 . ?
 C23 H23B 0.9700 . ?
 C12 H12A 0.9700 . ?
 C12 H12B 0.9700 . ?
 C12 C13 1.506(11) . ?
 C13 H13A 0.9700 . ?
 C13 H13B 0.9700 . ?
 C57 H57 0.9300 . ?
 C57 C58 1.411(9) . ?
 C58 C60 1.455(10) . ?
 C45 H45A 0.9700 . ?
 C45 H45B 0.9700 . ?
 C45 C46 1.494(11) . ?
 C61 H61A 0.9700 . ?
 C61 H61B 0.9700 . ?
 C61 C62 1.493(10) . ?
 C46 H46A 0.9700 . ?
 C46 H46B 0.9700 . ?
 C60 H60 0.9300 . ?
 C62 H62A 0.9700 . ?
 C62 H62B 0.9700 . ?
 C3 H3A 0.9600 . ?
 C3 H3B 0.9600 . ?
 C3 H3C 0.9600 . ?
 C3 C4 1.538(10) . ?
 C4 C1 1.553(11) . ?
 C4 C2 1.526(10) . ?
 C1 H1A 0.9600 . ?
 C1 H1B 0.9600 . ?
 C1 H1C 0.9600 . ?
 C2 H2A 0.9600 . ?
 C2 H2B 0.9600 . ?
 C2 H2C 0.9600 . ?
 C32 H32A 0.9600 . ?
 C32 H32B 0.9600 . ?
 C32 H32C 0.9600 . ?
 C63 H63A 0.9600 . ?
 C63 H63B 0.9600 . ?
 C63 H63C 0.9600 . ?
 C34 H34A 0.9600 . ?
 C34 H34B 0.9600 . ?
 C34 H34C 0.9600 . ?
 C35 H35A 0.9600 . ?
 C35 H35B 0.9600 . ?
 C35 H35C 0.9600 . ?
 C33 H33A 0.9600 . ?
 C33 H33B 0.9600 . ?
 C33 H33C 0.9600 . ?

loop_
  _geom_angle_atom_site_label_1
  _geom_angle_atom_site_label_2
  _geom_angle_atom_site_label_3
  _geom_angle
  _geom_angle_site_symmetry_1
  _geom_angle_site_symmetry_3
  _geom_angle_publ_flag
 O4 Zn3 Zn4 41.10(12) . . ?
 O4 Zn3 O3 79.26(16) . . ?
 O4 Zn3 O7 94.58(17) . . ?
 O4 Zn3 O8 151.86(17) . . ?
 O4 Zn3 N6 104.58(19) . . ?
 O4 Zn3 N5 85.62(18) . . ?
 O4 Zn3 C31 123.6(2) . . ?
 O3 Zn3 Zn4 39.18(12) . . ?
 O3 Zn3 O7 93.98(18) . . ?
 O3 Zn3 O8 89.12(18) . . ?
 O3 Zn3 N6 84.23(18) . . ?
 O3 Zn3 N5 162.43(19) . . ?
 O3 Zn3 C31 90.5(2) . . ?
 O7 Zn3 Zn4 102.52(12) . . ?
 O7 Zn3 C31 30.47(19) . . ?
 O8 Zn3 Zn4 126.81(13) . . ?
 O8 Zn3 O7 60.47(17) . . ?
 O8 Zn3 C31 30.05(19) . . ?
 N6 Zn3 Zn4 88.66(15) . . ?
 N6 Zn3 O7 160.0(2) . . ?
 N6 Zn3 O8 99.57(19) . . ?
 N6 Zn3 C31 129.5(2) . . ?
 N5 Zn3 Zn4 124.04(15) . . ?
 N5 Zn3 O7 96.12(19) . . ?
 N5 Zn3 O8 108.37(19) . . ?
 N5 Zn3 N6 91.0(2) . . ?
 N5 Zn3 C31 105.4(2) . . ?
 C31 Zn3 Zn4 117.11(16) . . ?
 O17 Zn1 Zn2 92.93(13) . . ?
 O17 Zn1 O14 94.96(18) . . ?
 O17 Zn1 O15 103.66(19) . . ?
 O17 Zn1 N1 90.0(2) . . ?
 O17 Zn1 N2 118.2(2) . . ?
 O14 Zn1 Zn2 41.69(11) . . ?
 O14 Zn1 N1 172.66(19) . . ?
 O14 Zn1 N2 81.15(18) . . ?
 O15 Zn1 Zn2 39.33(13) . . ?
 O15 Zn1 O14 79.20(17) . . ?
 O15 Zn1 N1 104.9(2) . . ?
 O15 Zn1 N2 134.9(2) . . ?
 N1 Zn1 Zn2 143.60(16) . . ?
 N1 Zn1 N2 91.7(2) . . ?
 N2 Zn1 Zn2 118.22(15) . . ?
 O4 Zn4 Zn3 39.94(11) . . ?
 O4 Zn4 N7 166.4(2) . . ?
 O9 Zn4 Zn3 102.82(13) . . ?
 O9 Zn4 O4 106.35(18) . . ?
 O9 Zn4 O3 103.90(18) . . ?
 O9 Zn4 N8 118.4(2) . . ?
 O9 Zn4 N7 86.7(2) . . ?
 O3 Zn4 Zn3 39.85(12) . . ?
 O3 Zn4 O4 78.78(16) . . ?
 O3 Zn4 N8 137.4(2) . . ?
 O3 Zn4 N7 94.45(19) . . ?
 N8 Zn4 Zn3 119.08(15) . . ?
 N8 Zn4 O4 84.36(18) . . ?
 N8 Zn4 N7 93.0(2) . . ?
 N7 Zn4 Zn3 134.29(15) . . ?
 O14 Zn2 Zn1 42.30(12) . . ?
 O14 Zn2 N3 80.52(18) . . ?
 O14 Zn2 N4 161.8(2) . . ?
 O15 Zn2 Zn1 39.02(12) . . ?
 O15 Zn2 O14 79.49(17) . . ?
 O15 Zn2 N3 137.1(2) . . ?
 O15 Zn2 N4 98.2(2) . . ?
 O16 Zn2 Zn1 125.31(15) . . ?
 O16 Zn2 O14 108.56(18) . . ?
 O16 Zn2 O15 110.7(2) . . ?
 O16 Zn2 N3 111.6(2) . . ?
 O16 Zn2 N4 89.3(2) . . ?
 N3 Zn2 Zn1 106.55(15) . . ?
 N3 Zn2 N4 89.5(2) . . ?
 N4 Zn2 Zn1 129.12(16) . . ?
 Zn3 O4 Zn4 98.96(17) . . ?
 C8 O4 Zn3 126.4(4) . . ?
 C8 O4 Zn4 131.9(4) . . ?
 C59 O17 Zn1 129.2(4) . . ?
 Zn2 O14 Zn1 96.00(17) . . ?
 C40 O14 Zn1 124.1(4) . . ?
 C40 O14 Zn2 134.6(4) . . ?
 C20 O9 Zn4 128.3(4) . . ?
 Zn4 O3 Zn3 100.97(18) . . ?
 C30 O3 Zn3 122.5(4) . . ?
 C30 O3 Zn4 119.7(4) . . ?
 N6 O2 C23 110.8(5) . . ?
 Zn1 O15 Zn2 101.64(19) . . ?
 C63 O15 Zn1 125.0(5) . . ?
 C63 O15 Zn2 117.3(6) . . ?
 C31 O7 Zn3 88.6(4) . . ?
 C53 O16 Zn2 129.7(4) . . ?
 C31 O8 Zn3 92.0(4) . . ?
 N7 O6 C13 111.4(5) . . ?
 C12 O5 N8 110.4(5) . . ?
 C62 O12 N2 111.9(5) . . ?
 N5 O1 C22 110.9(4) . . ?
 N3 O11 C45 109.6(5) . . ?
 N4 O10 C46 109.7(5) . . ?
 O2 N6 Zn3 118.3(4) . . ?
 C24 N6 Zn3 129.1(4) . . ?
 C24 N6 O2 112.1(5) . . ?
 O1 N5 Zn3 124.0(4) . . ?
 C21 N5 Zn3 124.1(4) . . ?
 C21 N5 O1 110.9(5) . . ?
 N1 O13 C61 110.0(5) . . ?
 O5 N8 Zn4 116.4(4) . . ?
 C11 N8 Zn4 131.4(4) . . ?
 C11 N8 O5 111.0(5) . . ?
 O13 N1 Zn1 123.9(4) . . ?
 C60 N1 Zn1 125.7(5) . . ?
 C60 N1 O13 110.3(6) . . ?
 O6 N7 Zn4 125.9(4) . . ?
 C14 N7 Zn4 123.4(5) . . ?
 C14 N7 O6 110.4(5) . . ?
 O12 N2 Zn1 118.2(4) . . ?
 C44 N2 Zn1 125.3(4) . . ?
 C44 N2 O12 109.9(5) . . ?
 O11 N3 Zn2 117.0(4) . . ?
 C43 N3 Zn2 130.0(5) . . ?
 C43 N3 O11 111.2(5) . . ?
 O10 N4 Zn2 123.6(4) . . ?
 C47 N4 Zn2 125.6(5) . . ?
 C47 N4 O10 110.6(5) . . ?
 C40 C39 C44 122.7(6) . . ?
 C38 C39 C40 119.3(6) . . ?
 C38 C39 C44 117.8(6) . . ?
 N6 C24 H24 118.6 . . ?
 N6 C24 C25 122.8(6) . . ?
 C25 C24 H24 118.6 . . ?
 O9 C20 C15 124.1(6) . . ?
 O9 C20 C19 120.4(6) . . ?
 C19 C20 C15 115.6(6) . . ?
 C40 C41 C43 122.1(6) . . ?
 C42 C41 C40 119.6(6) . . ?
 C42 C41 C43 118.1(6) . . ?
 O14 C40 C39 120.1(6) . . ?
 O14 C40 C41 121.6(6) . . ?
 C41 C40 C39 118.3(6) . . ?
 N2 C44 C39 126.0(6) . . ?
 N2 C44 H44 117.0 . . ?
 C39 C44 H44 117.0 . . ?
 O17 C59 C54 120.4(6) . . ?
 O17 C59 C58 125.6(6) . . ?
 C58 C59 C54 114.1(6) . . ?
 O3 C30 C25 122.0(6) . . ?
 O3 C30 C29 122.3(6) . . ?
 C29 C30 C25 115.7(6) . . ?
 C20 C15 C14 123.4(6) . . ?
 C16 C15 C20 119.9(6) . . ?
 C16 C15 C14 116.8(6) . . ?
 C30 C25 C24 122.7(6) . . ?
 C26 C25 C24 117.1(6) . . ?
 C26 C25 C30 120.2(6) . . ?
 C8 C9 C21 123.8(6) . . ?
 C10 C9 C8 120.2(6) . . ?
 C10 C9 C21 116.0(6) . . ?
 O4 C8 C9 121.9(5) . . ?
 O4 C8 C7 122.1(5) . . ?
 C7 C8 C9 116.0(5) . . ?
 N8 C11 H11 117.2 . . ?
 N8 C11 C7 125.5(6) . . ?
 C7 C11 H11 117.2 . . ?
 C38 C37 C42 116.4(6) . . ?
 C38 C37 C36 122.2(6) . . ?
 C42 C37 C36 121.4(6) . . ?
 C59 C54 Br6 116.9(5) . . ?
 C55 C54 Br6 118.7(5) . . ?
 C55 C54 C59 124.3(7) . . ?
 C8 C7 C11 123.3(6) . . ?
 C8 C7 C6 121.1(6) . . ?
 C6 C7 C11 115.6(5) . . ?
 C18 C17 Br3 118.1(5) . . ?
 C16 C17 Br3 120.4(5) . . ?
 C16 C17 C18 121.5(6) . . ?
 C25 C26 H26 120.1 . . ?
 C27 C26 C25 119.8(6) . . ?
 C27 C26 H26 120.1 . . ?
 C7 C6 H6 118.9 . . ?
 C5 C6 C7 122.3(6) . . ?
 C5 C6 H6 118.9 . . ?
 C17 C18 H18 121.5 . . ?
 C19 C18 C17 117.0(6) . . ?
 C19 C18 H18 121.5 . . ?
 N7 C14 C15 125.9(6) . . ?
 N7 C14 H14 117.0 . . ?
 C15 C14 H14 117.0 . . ?
 C55 C56 Br5 118.6(6) . . ?
 C57 C56 Br5 120.0(6) . . ?
 C57 C56 C55 121.4(7) . . ?
 C20 C19 Br4 116.3(5) . . ?
 C18 C19 Br4 118.3(5) . . ?
 C18 C19 C20 125.3(6) . . ?
 C26 C27 Br1 120.5(5) . . ?
 C28 C27 Br1 118.3(5) . . ?
 C28 C27 C26 121.2(6) . . ?
 C30 C29 Br2 116.2(5) . . ?
 C28 C29 Br2 120.4(5) . . ?
 C28 C29 C30 123.5(6) . . ?
 N5 C21 C9 126.3(6) . . ?
 N5 C21 H21 116.9 . . ?
 C9 C21 H21 116.9 . . ?
 C53 C52 Br7 118.3(5) . . ?
 C51 C52 Br7 118.2(5) . . ?
 C51 C52 C53 123.5(6) . . ?
 N3 C43 C41 124.2(6) . . ?
 N3 C43 H43 117.9 . . ?
 C41 C43 H43 117.9 . . ?
 C15 C16 H16 119.6 . . ?
 C17 C16 C15 120.7(6) . . ?
 C17 C16 H16 119.6 . . ?
 C54 C55 C56 118.2(7) . . ?
 C54 C55 H55 120.9 . . ?
 C56 C55 H55 120.9 . . ?
 O7 C31 Zn3 61.0(4) . . ?
 O7 C31 C32 119.7(6) . . ?
 O8 C31 Zn3 57.9(4) . . ?
 O8 C31 O7 118.7(7) . . ?
 O8 C31 C32 121.6(7) . . ?
 C32 C31 Zn3 175.6(5) . . ?
 O1 C22 H22A 109.0 . . ?
 O1 C22 H22B 109.0 . . ?
 O1 C22 C23 113.0(6) . . ?
 H22A C22 H22B 107.8 . . ?
 C23 C22 H22A 109.0 . . ?
 C23 C22 H22B 109.0 . . ?
 O16 C53 C52 120.7(6) . . ?
 O16 C53 C48 123.3(6) . . ?
 C52 C53 C48 116.0(6) . . ?
 C39 C38 H38 118.6 . . ?
 C37 C38 C39 122.7(6) . . ?
 C37 C38 H38 118.6 . . ?
 C48 C49 H49 119.5 . . ?
 C50 C49 H49 119.5 . . ?
 C50 C49 C48 121.1(7) . . ?
 C6 C5 C10 116.7(6) . . ?
 C6 C5 C4 123.0(6) . . ?
 C10 C5 C4 120.4(6) . . ?
 C9 C10 C5 123.8(6) . . ?
 C9 C10 H10 118.1 . . ?
 C5 C10 H10 118.1 . . ?
 N4 C47 H47 117.5 . . ?
 N4 C47 C48 124.9(6) . . ?
 C48 C47 H47 117.5 . . ?
 C49 C48 C53 119.5(7) . . ?
 C49 C48 C47 115.3(6) . . ?
 C47 C48 C53 125.2(6) . . ?
 C27 C28 C29 118.7(7) . . ?
 C27 C28 H28 120.7 . . ?
 C29 C28 H28 120.7 . . ?
 C41 C42 C37 123.3(6) . . ?
 C41 C42 H42 118.4 . . ?
 C37 C42 H42 118.4 . . ?
 C52 C51 H51 120.8 . . ?
 C52 C51 C50 118.4(7) . . ?
 C50 C51 H51 120.8 . . ?
 C34 C36 C37 113.3(6) . . ?
 C34 C36 C35 106.4(9) . . ?
 C34 C36 C33 108.7(9) . . ?
 C35 C36 C37 109.1(6) . . ?
 C35 C36 C33 109.4(7) . . ?
 C33 C36 C37 109.8(6) . . ?
 C49 C50 Br8 119.6(5) . . ?
 C49 C50 C51 121.4(6) . . ?
 C51 C50 Br8 119.0(6) . . ?
 O2 C23 C22 115.8(5) . . ?
 O2 C23 H23A 108.3 . . ?
 O2 C23 H23B 108.3 . . ?
 C22 C23 H23A 108.3 . . ?
 C22 C23 H23B 108.3 . . ?
 H23A C23 H23B 107.4 . . ?
 O5 C12 H12A 108.5 . . ?
 O5 C12 H12B 108.5 . . ?
 O5 C12 C13 115.3(5) . . ?
 H12A C12 H12B 107.5 . . ?
 C13 C12 H12A 108.5 . . ?
 C13 C12 H12B 108.5 . . ?
 O6 C13 C12 112.7(6) . . ?
 O6 C13 H13A 109.0 . . ?
 O6 C13 H13B 109.0 . . ?
 C12 C13 H13A 109.0 . . ?
 C12 C13 H13B 109.0 . . ?
 H13A C13 H13B 107.8 . . ?
 C56 C57 H57 119.4 . . ?
 C56 C57 C58 121.2(7) . . ?
 C58 C57 H57 119.4 . . ?
 C59 C58 C60 123.3(6) . . ?
 C57 C58 C59 120.6(7) . . ?
 C57 C58 C60 116.0(7) . . ?
 O11 C45 H45A 108.6 . . ?
 O11 C45 H45B 108.6 . . ?
 O11 C45 C46 114.6(6) . . ?
 H45A C45 H45B 107.6 . . ?
 C46 C45 H45A 108.6 . . ?
 C46 C45 H45B 108.6 . . ?
 O13 C61 H61A 108.8 . . ?
 O13 C61 H61B 108.8 . . ?
 O13 C61 C62 113.7(7) . . ?
 H61A C61 H61B 107.7 . . ?
 C62 C61 H61A 108.8 . . ?
 C62 C61 H61B 108.8 . . ?
 O10 C46 C45 113.3(6) . . ?
 O10 C46 H46A 108.9 . . ?
 O10 C46 H46B 108.9 . . ?
 C45 C46 H46A 108.9 . . ?
 C45 C46 H46B 108.9 . . ?
 H46A C46 H46B 107.7 . . ?
 N1 C60 C58 125.3(7) . . ?
 N1 C60 H60 117.3 . . ?
 C58 C60 H60 117.3 . . ?
 O12 C62 C61 116.2(6) . . ?
 O12 C62 H62A 108.2 . . ?
 O12 C62 H62B 108.2 . . ?
 C61 C62 H62A 108.2 . . ?
 C61 C62 H62B 108.2 . . ?
 H62A C62 H62B 107.4 . . ?
 H3A C3 H3B 109.5 . . ?
 H3A C3 H3C 109.5 . . ?
 H3B C3 H3C 109.5 . . ?
 C4 C3 H3A 109.5 . . ?
 C4 C3 H3B 109.5 . . ?
 C4 C3 H3C 109.5 . . ?
 C5 C4 C3 111.6(6) . . ?
 C5 C4 C1 109.8(6) . . ?
 C3 C4 C1 106.9(6) . . ?
 C2 C4 C5 110.0(6) . . ?
 C2 C4 C3 108.8(6) . . ?
 C2 C4 C1 109.7(7) . . ?
 C4 C1 H1A 109.5 . . ?
 C4 C1 H1B 109.5 . . ?
 C4 C1 H1C 109.5 . . ?
 H1A C1 H1B 109.5 . . ?
 H1A C1 H1C 109.5 . . ?
 H1B C1 H1C 109.5 . . ?
 C4 C2 H2A 109.5 . . ?
 C4 C2 H2B 109.5 . . ?
 C4 C2 H2C 109.5 . . ?
 H2A C2 H2B 109.5 . . ?
 H2A C2 H2C 109.5 . . ?
 H2B C2 H2C 109.5 . . ?
 C31 C32 H32A 109.5 . . ?
 C31 C32 H32B 109.5 . . ?
 C31 C32 H32C 109.5 . . ?
 H32A C32 H32B 109.5 . . ?
 H32A C32 H32C 109.5 . . ?
 H32B C32 H32C 109.5 . . ?
 O15 C63 H63A 109.5 . . ?
 O15 C63 H63B 109.5 . . ?
 O15 C63 H63C 109.5 . . ?
 H63A C63 H63B 109.5 . . ?
 H63A C63 H63C 109.5 . . ?
 H63B C63 H63C 109.5 . . ?
 C36 C34 H34A 109.5 . . ?
 C36 C34 H34B 109.5 . . ?
 C36 C34 H34C 109.5 . . ?
 H34A C34 H34B 109.5 . . ?
 H34A C34 H34C 109.5 . . ?
 H34B C34 H34C 109.5 . . ?
 C36 C35 H35A 109.5 . . ?
 C36 C35 H35B 109.5 . . ?
 C36 C35 H35C 109.5 . . ?
 H35A C35 H35B 109.5 . . ?
 H35A C35 H35C 109.5 . . ?
 H35B C35 H35C 109.5 . . ?
 C36 C33 H33A 109.5 . . ?
 C36 C33 H33B 109.5 . . ?
 C36 C33 H33C 109.5 . . ?
 H33A C33 H33B 109.5 . . ?
 H33A C33 H33C 109.5 . . ?
 H33B C33 H33C 109.5 . . ?

_shelx_res_file
;
    20171225lzw122_0m_a_sq.res created by SHELXL-2014/7

TITL 20171225LZW122_0m_a.res in P-1
CELL 0.71073 13.4501 18.6963 19.6467 72.745 72.528 88.801
ZERR 2 0.0006 0.0009 0.0008 0.001 0.001 0.002
LATT 1
SFAC C H Br N O Zn
UNIT 126 120 16 16 34 8

L.S. 40
PLAN  20
SIZE 0.22 0.18 0.17
TEMP 23
BOND $H
abin
fmap 2
acta
OMIT -3 50.02
OMIT -1 1 1
OMIT 1 2 2
OMIT -1 7 8
OMIT 1 3 4
REM <olex2.extras>
REM <HklSrc "%.\\20171225lzw122_0m_a_sq.hkl">
REM </olex2.extras>

WGHT    0.072200    1.605700
FVAR       0.18215
BR4   3    0.490990    0.430856   -0.096530    11.00000    0.02862    0.02806 =
         0.03211   -0.00178   -0.01185    0.00072
BR6   3    0.620712    0.528970    0.319495    11.00000    0.03456    0.03364 =
         0.03753   -0.00528   -0.01682   -0.00207
BR3   3    0.168120    0.572499   -0.204363    11.00000    0.04635    0.02960 =
         0.03976   -0.00152   -0.02648    0.00831
ZN3   6    0.351444    0.132285    0.030168    11.00000    0.02847    0.02055 =
         0.01958   -0.00649   -0.00927    0.00694
ZN1   6    0.300700    0.434883    0.295430    11.00000    0.02726    0.02049 =
         0.02791   -0.00823   -0.01208    0.00506
ZN4   6    0.242127    0.253320    0.104075    11.00000    0.02850    0.01982 =
         0.01988   -0.00475   -0.00797    0.00708
ZN2   6    0.343470    0.292723    0.407433    11.00000    0.03362    0.02122 =
         0.02282   -0.00495   -0.01161   -0.00024
BR5   3    0.434661    0.797379    0.346396    11.00000    0.07863    0.02474 =
         0.04027   -0.01334   -0.02097   -0.00311
BR7   3    0.159615    0.063288    0.419885    11.00000    0.06547    0.04341 =
         0.03096   -0.01513   -0.00741   -0.02299
BR2   3   -0.006182    0.142065    0.074590    11.00000    0.03243    0.05026 =
         0.04222    0.00666   -0.01170   -0.00220
BR1   3    0.044396    0.361477   -0.204407    11.00000    0.06394    0.04594 =
         0.04347   -0.00619   -0.03613    0.01850
BR8   3    0.021975   -0.015937    0.735063    11.00000    0.06614    0.04440 =
         0.02904    0.00542   -0.00857   -0.02076
O4    5    0.358739    0.177891    0.111427    11.00000    0.02955    0.02420 =
         0.01883   -0.00869   -0.01209    0.00734
O17   5    0.416173    0.494556    0.298112    11.00000    0.03109    0.01645 =
         0.03548   -0.00943   -0.01339    0.00356
O14   5    0.382922    0.339599    0.293071    11.00000    0.02040    0.02295 =
         0.02087   -0.00479   -0.00556    0.00231
O9    5    0.311576    0.347204    0.031567    11.00000    0.03311    0.02147 =
         0.02567   -0.00358   -0.01418    0.00440
O3    5    0.219952    0.191379    0.040181    11.00000    0.03309    0.01804 =
         0.02117   -0.00395   -0.01594    0.00921
O2    5    0.523835    0.233694   -0.101362    11.00000    0.02620    0.02585 =
         0.02994   -0.00959   -0.00585    0.00149
O15   5    0.241143    0.370973    0.400444    11.00000    0.02331    0.03165 =
         0.02233   -0.00529   -0.00083    0.00247
O7    5    0.266540    0.026377    0.110068    11.00000    0.04159    0.02785 =
         0.03191   -0.00859   -0.01231    0.00353
O16   5    0.274295    0.193004    0.434797    11.00000    0.04790    0.02575 =
         0.02338   -0.00523   -0.00589   -0.01281
O8    5    0.279923    0.058195   -0.009011    11.00000    0.03904    0.02918 =
         0.02340   -0.00554   -0.01093    0.00174
O6    5   -0.002092    0.281213    0.165084    11.00000    0.02261    0.03903 =
         0.03604   -0.00451    0.00174    0.00739
O5    5    0.144776    0.278660    0.251010    11.00000    0.04209    0.03013 =
         0.02593   -0.01063   -0.00836    0.01609
O12   5    0.241462    0.481822    0.150888    11.00000    0.04152    0.03280 =
         0.03792   -0.00588   -0.02462    0.01361
O1    5    0.570994    0.075776   -0.029193    11.00000    0.03868    0.03014 =
         0.02501   -0.01256   -0.01085    0.01949
O11   5    0.550044    0.269600    0.439980    11.00000    0.04569    0.02843 =
         0.03240   -0.00159   -0.02307    0.00439
O10   5    0.380710    0.324265    0.545789    11.00000    0.06296    0.02986 =
         0.03539   -0.01116   -0.02460   -0.01729
N6    4    0.413718    0.219523   -0.071553    11.00000    0.02357    0.02741 =
         0.02059   -0.00733   -0.00079    0.00252
N5    4    0.502054    0.098782    0.028944    11.00000    0.02501    0.02187 =
         0.01814   -0.00740   -0.00228    0.00320
O13   5    0.111032    0.528820    0.278640    11.00000    0.03768    0.04536 =
         0.06301   -0.03483   -0.02995    0.02420
N8    4    0.223594    0.237822    0.214060    11.00000    0.02589    0.02504 =
         0.02146   -0.00915   -0.00206    0.00595
N1    4    0.212612    0.528565    0.286452    11.00000    0.02921    0.03163 =
         0.03561   -0.01661   -0.01719    0.01042
N7    4    0.096137    0.307465    0.108913    11.00000    0.02933    0.02491 =
         0.03039   -0.00937   -0.01030    0.00928
N2    4    0.298187    0.428528    0.190960    11.00000    0.02474    0.02056 =
         0.03157   -0.00883   -0.01671    0.00528
N3    4    0.506817    0.289571    0.379543    11.00000    0.02679    0.02987 =
         0.02707   -0.00262   -0.01541   -0.00024
N4    4    0.335011    0.273650    0.520534    11.00000    0.04417    0.02231 =
         0.02888   -0.00896   -0.01534   -0.00056
C39   1    0.454943    0.362413    0.162729    11.00000    0.01821    0.01563 =
         0.02999   -0.00668   -0.00499   -0.00029
C24   1    0.366277    0.269099   -0.107631    11.00000    0.03356    0.02118 =
         0.01392   -0.00508   -0.00567    0.00265
AFIX  43
H24   2    0.405805    0.308164   -0.148023    11.00000   -1.20000
AFIX   0
C20   1    0.276248    0.396036   -0.017277    11.00000    0.02402    0.01755 =
         0.02323   -0.00606   -0.01217    0.00377

C41   1    0.555135    0.305303    0.245989    11.00000    0.02457    0.02225 =
         0.02582   -0.00420   -0.00914   -0.00098
C40   1    0.461655    0.335302    0.236162    11.00000    0.02354    0.01097 =
         0.03222   -0.00322   -0.01243   -0.00043
C44   1    0.371597    0.406468    0.144984    11.00000    0.02692    0.02154 =
         0.02827   -0.00693   -0.01547   -0.00032
AFIX  43
H44   2    0.371345    0.420035    0.095508    11.00000   -1.20000
AFIX   0
C59   1    0.417580    0.560602    0.304990    11.00000    0.02372    0.02321 =
         0.02208   -0.00330   -0.00658   -0.00535

C30   1    0.184725    0.222894   -0.017410    11.00000    0.02957    0.01764 =
         0.02441   -0.00843   -0.00334    0.00976
C15   1    0.167931    0.406075   -0.007945    11.00000    0.02926    0.02095 =
         0.02396   -0.01091   -0.00786    0.00995
C25   1    0.252042    0.267114   -0.088120    11.00000    0.03098    0.01728 =
         0.02085   -0.00600   -0.00913    0.00390
C9    1    0.486500    0.101940    0.154872    11.00000    0.02686    0.01781 =
         0.02600   -0.00588   -0.01243    0.00297
C8    1    0.402347    0.149458    0.164418    11.00000    0.02220    0.01460 =
         0.01879   -0.00487   -0.00384    0.00293
C11   1    0.280549    0.208089    0.254807    11.00000    0.03074    0.01986 =
         0.01829   -0.00609   -0.00278    0.00129
AFIX  43
H11   2    0.264294    0.215025    0.301779    11.00000   -1.20000
AFIX   0

C37   1    0.626428    0.318375    0.112667    11.00000    0.02044    0.02696 =
         0.02732   -0.00581   -0.00178    0.00287
C54   1    0.507487    0.590909    0.316375    11.00000    0.04304    0.01969 =
         0.01642   -0.00082   -0.01722    0.00033
C7    1    0.368718    0.164276    0.234126    11.00000    0.03015    0.01631 =
         0.01641   -0.00243   -0.00872    0.00201
C17   1    0.210417    0.501329   -0.127242    11.00000    0.04282    0.01910 =
         0.02560   -0.00711   -0.01784    0.01406
C26   1    0.210285    0.308024   -0.143481    11.00000    0.03546    0.02721 =
         0.02235   -0.00833   -0.00991    0.00111
AFIX  43
H26   2    0.254103    0.338667   -0.188807    11.00000   -1.20000
AFIX   0
C6    1    0.417696    0.133758    0.290040    11.00000    0.03449    0.01834 =
         0.02455   -0.00915   -0.01010   -0.00358
AFIX  43
H6    2    0.394417    0.145322    0.334865    11.00000   -1.20000
AFIX   0
C18   1    0.317503    0.495428   -0.137665    11.00000    0.03945    0.02004 =
         0.02672   -0.00564   -0.01303    0.00429
AFIX  43
H18   2    0.367321    0.525411   -0.180295    11.00000   -1.20000
AFIX   0
C14   1    0.085654    0.364375    0.057137    11.00000    0.02781    0.03067 =
         0.02350   -0.01073   -0.00587    0.00679
AFIX  43
H14   2    0.018639    0.380346    0.061939    11.00000   -1.20000
AFIX   0

C56   1    0.427789    0.702379    0.328711    11.00000    0.05540    0.01779 =
         0.02309   -0.00664   -0.00919   -0.00984
C19   1    0.345519    0.443716   -0.082477    11.00000    0.02070    0.02023 =
         0.03124   -0.00861   -0.01229    0.00164
C27   1    0.103631    0.302967   -0.130892    11.00000    0.04741    0.03365 =
         0.02777   -0.01329   -0.02737    0.01772
C29   1    0.079784    0.214353   -0.012833    11.00000    0.03564    0.02927 =
         0.02094   -0.00835   -0.00567    0.00626
C21   1    0.535369    0.084109    0.085683    11.00000    0.02595    0.01838 =
         0.03197   -0.00784   -0.01261    0.00563
AFIX  43
H21   2    0.596781    0.059672    0.082419    11.00000   -1.20000
AFIX   0

C52   1    0.161836    0.083074    0.508094    11.00000    0.03366    0.02710 =
         0.02525   -0.01052   -0.00851    0.00122
C43   1    0.575197    0.286780    0.317431    11.00000    0.02855    0.01408 =
         0.03606   -0.00144   -0.01285   -0.00126
AFIX  43
H43   2    0.641076    0.271946    0.319100    11.00000   -1.20000
AFIX   0

C16   1    0.137709    0.459034   -0.063949    11.00000    0.03154    0.02045 =
         0.03746   -0.01285   -0.02082    0.00978
AFIX  43
H16   2    0.067103    0.465324   -0.057753    11.00000   -1.20000
AFIX   0

C55   1    0.513367    0.658470    0.328219    11.00000    0.03721    0.03170 =
         0.02384   -0.00459   -0.01075   -0.01141
AFIX  43
H55   2    0.572704    0.675092    0.335799    11.00000   -1.20000
AFIX   0

C31   1    0.242814    0.013255    0.056339    11.00000    0.02947    0.02785 =
         0.03578   -0.00965   -0.01022    0.00966
C22   1    0.538869    0.098359   -0.095266    11.00000    0.02991    0.02853 =
         0.01688   -0.00990   -0.00586    0.00453
AFIX  23
H22A  2    0.463595    0.089274   -0.080966    11.00000   -1.20000
H22B  2    0.570379    0.067704   -0.127036    11.00000   -1.20000
AFIX   0

C53   1    0.222048    0.148030    0.501034    11.00000    0.03239    0.02441 =
         0.03022   -0.00845   -0.01147   -0.00026
C38   1    0.536402    0.351852    0.103100    11.00000    0.03202    0.02420 =
         0.02500   -0.00557   -0.01202    0.00032
AFIX  43
H38   2    0.529824    0.367937    0.055199    11.00000   -1.20000
AFIX   0
C49   1    0.164786    0.108573    0.638544    11.00000    0.04208    0.03276 =
         0.02376   -0.00487   -0.00993   -0.00074
AFIX  43
H49   2    0.165944    0.115830    0.683134    11.00000   -1.20000
AFIX   0

C5    1    0.497675    0.088082    0.280340    11.00000    0.04774    0.02164 =
         0.03105   -0.00729   -0.02381    0.00504
C10   1    0.530328    0.073048    0.212116    11.00000    0.03332    0.02100 =
         0.03612   -0.00826   -0.01556    0.01034
AFIX  43
H10   2    0.584635    0.041854    0.204375    11.00000   -1.20000
AFIX   0

C47   1    0.281780    0.219513    0.575880    11.00000    0.05184    0.02511 =
         0.02395   -0.00658   -0.01394    0.00004
AFIX  43
H47   2    0.280665    0.219025    0.623576    11.00000   -1.20000
AFIX   0
C48   1    0.223476    0.159293    0.570052    11.00000    0.03312    0.02871 =
         0.02620   -0.00242   -0.00675   -0.00251

C28   1    0.038664    0.254157   -0.067506    11.00000    0.02769    0.03827 =
         0.03108   -0.01159   -0.01327    0.00955
AFIX  43
H28   2   -0.032229    0.247939   -0.061415    11.00000   -1.20000
AFIX   0

C42   1    0.634131    0.297836    0.184788    11.00000    0.03020    0.02080 =
         0.04073   -0.00591   -0.02014    0.00799
AFIX  43
H42   2    0.695351    0.278089    0.192379    11.00000   -1.20000
AFIX   0
C51   1    0.103769    0.034659    0.575704    11.00000    0.04560    0.02240 =
         0.03954   -0.00799   -0.01337   -0.00588
AFIX  43
H51   2    0.063993   -0.006485    0.577797    11.00000   -1.20000
AFIX   0
C36   1    0.715251    0.306307    0.046455    11.00000    0.03062    0.03975 =
         0.03441   -0.01461   -0.01020    0.00858
C50   1    0.105907    0.048641    0.640810    11.00000    0.02853    0.03428 =
         0.02068    0.00494    0.00195   -0.00651

C23   1    0.569020    0.180584   -0.139662    11.00000    0.03361    0.03614 =
         0.02526   -0.00822   -0.00675    0.00681
AFIX  23
H23A  2    0.644501    0.188792   -0.154769    11.00000   -1.20000
H23B  2    0.548949    0.190933   -0.184922    11.00000   -1.20000
AFIX   0
C12   1    0.046394    0.236898    0.280277    11.00000    0.02628    0.04060 =
         0.02935   -0.00336    0.00609    0.00703
AFIX  23
H12A  2   -0.004917    0.265709    0.305009    11.00000   -1.20000
H12B  2    0.051046    0.190906    0.318038    11.00000   -1.20000
AFIX   0
C13   1    0.007509    0.216705    0.223537    11.00000    0.02673    0.02603 =
         0.03787    0.00545    0.00187   -0.00051
AFIX  23
H13A  2    0.055398    0.184292    0.201532    11.00000   -1.20000
H13B  2   -0.060114    0.188798    0.248771    11.00000   -1.20000
AFIX   0

C57   1    0.343244    0.680211    0.315115    11.00000    0.05563    0.01963 =
         0.03352   -0.01091   -0.02062    0.01152
AFIX  43
H57   2    0.288908    0.711643    0.313653    11.00000   -1.20000
AFIX   0
C58   1    0.335324    0.610106    0.303005    11.00000    0.04736    0.01591 =
         0.02792   -0.00808   -0.01766    0.00873
C45   1    0.561288    0.334892    0.462733    11.00000    0.04964    0.03075 =
         0.03933   -0.00986   -0.02334   -0.00653
AFIX  23
H45A  2    0.612882    0.370925    0.422078    11.00000   -1.20000
H45B  2    0.587932    0.319989    0.505238    11.00000   -1.20000
AFIX   0
C61   1    0.087853    0.461798    0.263448    11.00000    0.02123    0.04484 =
         0.06442   -0.02520   -0.01983    0.00547
AFIX  23
H61A  2    0.012581    0.452089    0.278732    11.00000   -1.20000
H61B  2    0.115231    0.419904    0.293450    11.00000   -1.20000
AFIX   0
C46   1    0.462698    0.372686    0.483673    11.00000    0.05092    0.02137 =
         0.03975   -0.00619   -0.02316   -0.01079
AFIX  23
H46A  2    0.477868    0.416393    0.496863    11.00000   -1.20000
H46B  2    0.437701    0.390019    0.440507    11.00000   -1.20000
AFIX   0
C60   1    0.238751    0.591674    0.290887    11.00000    0.04584    0.03288 =
         0.04534   -0.01955   -0.02982    0.01358
AFIX  43
H60   2    0.192334    0.629035    0.285980    11.00000   -1.20000
AFIX   0
C62   1    0.132045    0.465561    0.182963    11.00000    0.04305    0.03053 =
         0.06073   -0.02188   -0.03350    0.01587
AFIX  23
H62A  2    0.114302    0.417776    0.177901    11.00000   -1.20000
H62B  2    0.097964    0.503605    0.154093    11.00000   -1.20000
AFIX   0

C3    1    0.503392    0.078624    0.410880    11.00000    0.08384    0.02527 =
         0.03999   -0.01406   -0.04228    0.01413
AFIX 137
H3A   2    0.509289    0.132473    0.396931    11.00000   -1.50000
H3B   2    0.540596    0.058439    0.446270    11.00000   -1.50000
H3C   2    0.431050    0.060695    0.433171    11.00000   -1.50000
AFIX   0
C4    1    0.550237    0.053418    0.340826    11.00000    0.06272    0.02531 =
         0.03173   -0.00925   -0.03113    0.01541
C1    1    0.668335    0.079753    0.310458    11.00000    0.05538    0.06607 =
         0.04345   -0.01926   -0.03219    0.01381
AFIX 137
H1A   2    0.700081    0.066553    0.265507    11.00000   -1.50000
H1B   2    0.701550    0.055749    0.347427    11.00000   -1.50000
H1C   2    0.676392    0.133238    0.299664    11.00000   -1.50000
AFIX   0
C2    1    0.537023   -0.032131    0.363506    11.00000    0.09040    0.02385 =
         0.04616   -0.01135   -0.04879    0.01720
AFIX 137
H2A   2    0.464296   -0.047972    0.377713    11.00000   -1.50000
H2B   2    0.563126   -0.053321    0.405075    11.00000   -1.50000
H2C   2    0.575335   -0.048904    0.321996    11.00000   -1.50000
AFIX   0
C32   1    0.171374   -0.053671    0.072087    11.00000    0.05579    0.04024 =
         0.04646   -0.01054   -0.01723   -0.00406
AFIX 137
H32A  2    0.119398   -0.039193    0.047129    11.00000   -1.50000
H32B  2    0.137806   -0.073557    0.125094    11.00000   -1.50000
H32C  2    0.210959   -0.091319    0.054170    11.00000   -1.50000
AFIX   0

C63   1    0.133638    0.346922    0.436662    11.00000    0.06211    0.12118 =
         0.05382    0.00861   -0.00255    0.01357
AFIX 137
H63A  2    0.092156    0.388998    0.427252    11.00000   -1.50000
H63B  2    0.121640    0.326151    0.489623    11.00000   -1.50000
H63C  2    0.114483    0.309368    0.417581    11.00000   -1.50000
AFIX   0
C34   1    0.687215    0.324060   -0.025073    11.00000    0.08051    0.27100 =
         0.06118   -0.10069   -0.03464    0.10140
AFIX 137
H34A  2    0.679153    0.376881   -0.042535    11.00000   -1.50000
H34B  2    0.622827    0.296352   -0.016019    11.00000   -1.50000
H34C  2    0.741774    0.310276   -0.062305    11.00000   -1.50000
AFIX   0
C35   1    0.738667    0.224058    0.065813    11.00000    0.05931    0.04059 =
         0.10186   -0.01503    0.02155    0.01148
AFIX 137
H35A  2    0.792838    0.216039    0.024622    11.00000   -1.50000
H35B  2    0.676671    0.193355    0.075430    11.00000   -1.50000
H35C  2    0.761273    0.210864    0.109606    11.00000   -1.50000
AFIX   0
C33   1    0.813372    0.354909    0.032372    11.00000    0.07463    0.08566 =
         0.09493   -0.06713    0.02766   -0.02734
AFIX 137
H33A  2    0.871248    0.340986   -0.002569    11.00000   -1.50000
H33B  2    0.828265    0.347541    0.078703    11.00000   -1.50000
H33C  2    0.802372    0.406794    0.012116    11.00000   -1.50000
AFIX   0
HKLF 4

REM  20171225LZW122_0m_a.res in P-1
REM R1 =  0.0523 for   10738 Fo > 4sig(Fo)  and  0.0888 for all   15711 data
REM    909 parameters refined using      0 restraints

END

WGHT      0.0722      1.6120

REM Highest difference peak  1.434,  deepest hole -0.914,  1-sigma level  0.148
Q1    1   0.5173  0.8033  0.3122  11.00000  0.05    1.43
Q2    1   0.0643  0.3196 -0.2299  11.00000  0.05    0.93
Q3    1   0.2789  0.1691  0.0271  11.00000  0.05    0.92
Q4    1   0.0443  0.2889  0.4547  11.00000  0.05    0.87
Q5    1   0.2389  0.0114  0.4228  11.00000  0.05    0.87
Q6    1  -0.0261  0.0993  0.0682  11.00000  0.05    0.83
Q7    1   0.3158  0.2061  0.1103  11.00000  0.05    0.81
Q8    1   0.4633  0.3891 -0.0801  11.00000  0.05    0.80
Q9    1   0.5998  0.4667  0.3367  11.00000  0.05    0.79
Q10   1   0.1822  0.6232 -0.2096  11.00000  0.05    0.77
Q11   1   0.4205  0.4681 -0.0989  11.00000  0.05    0.77
Q12   1   0.3749  0.4013  0.2909  11.00000  0.05    0.77
Q13   1   0.1918  0.4021  0.4606  11.00000  0.05    0.76
Q14   1   0.0993  0.0930  0.4216  11.00000  0.05    0.74
Q15   1   0.1448  0.5235 -0.1870  11.00000  0.05    0.74
Q16   1   0.3221  0.2302  0.4194  11.00000  0.05    0.73
Q17   1   0.5604  0.5623  0.3134  11.00000  0.05    0.71
Q18   1   0.5012  0.4455 -0.1308  11.00000  0.05    0.70
Q19   1   0.4057  0.2599  0.4171  11.00000  0.05    0.67
Q20   1   0.0223  0.2997 -0.1886  11.00000  0.05    0.66
;
_shelx_res_checksum                45939
_shelx_hkl_file
;
  -2   0   0   20.10    2.90
  -2   0   0   23.10    2.30
   2   0   0   21.00    3.10
   2   0   0   18.60    2.30
  -3   0   0   48.30    4.90
  -3   0   0   55.19    4.40
   3   0   0   46.80    5.30
   3   0   0   40.10    4.30
  -4   0   0  234.28   15.30
  -4   0   0  212.18   15.90
   4   0   0  176.78   15.30
   4   0   0  223.48   16.40
  -5   0   0  130.79    9.10
  -5   0   0  104.19   10.10
   5   0   0   92.69    9.20
   5   0   0  118.39   11.00
  -6   0   0 1504.15   97.79
   6   0   0 1261.07   97.89
   6   0   0 1540.35   99.19
  -7   0   0   10.20    3.10
   7   0   0    3.60    5.30
   7   0   0   -1.50    3.50
   8   0   0  279.77   22.60
   8   0   0  251.17   20.60
   9   0   0   -0.80    5.00
   9   0   0   -3.50    7.00
  10   0   0   14.50    8.10
  10   0   0   16.90    6.40
  11   0   0    7.20    9.10
  11   0   0   10.10    6.70
  12   0   0   95.89   14.50
  12   0   0  111.89   14.50
  13   0   0   -4.70   10.20
  13   0   0    7.70    7.80
  14   0   0   -5.20   11.00
  14   0   0   14.50    9.40
  15   0   0   94.39   13.30
  15   0   0   97.59   17.80
  16   0   0  -16.40   14.30
  16  -1   0   68.59   16.20
  15  -1   0   74.39   11.30
  15  -1   0   76.09   15.30
  14  -1   0  -22.00    9.50
  14  -1   0    1.20    7.90
  13  -1   0   -4.60    9.10
  13  -1   0    4.20    7.10
  12  -1   0    1.10    8.40
  12  -1   0   12.70    6.70
  11  -1   0   84.19   11.60
  11  -1   0   84.99   11.70
  10  -1   0   66.49    8.20
  10  -1   0   62.69    9.50
   9  -1   0 1433.46   93.89
   9  -1   0 1260.27   92.39
   8  -1   0  167.48   15.00
   8  -1   0  140.99   12.90
   7  -1   0   10.30    3.40
   7  -1   0    9.00    4.40
  -7   1   0   13.60    3.80
   6  -1   0  401.96   28.10
   6  -1   0  355.86   26.80
  -6   1   0  383.26   27.10
   5  -1   0   95.69    9.00
   5  -1   0   88.99    7.50
  -5   1   0   69.99    9.40
  -5   1   0   90.29    7.70
   4  -1   0 4332.77  281.97
   4  -1   0 4399.76  282.47
  -4   1   0 3781.92  281.97
   3  -1   0   92.39    6.80
   3  -1   0   93.49    7.40
  -3   1   0   82.29    7.70
  -3   1   0   88.89    7.00
   2  -1   0  116.29    8.50
   2  -1   0  121.59    8.80
  -2   1   0  125.09    9.00
  -2   1   0  116.39    8.60
  -2  -1   0  391.46   26.30
  -2  -1   0  376.46   26.40
   2   1   0  383.16   26.60
   2   1   0  383.26   26.40
  -3  -1   0  208.38   15.20
  -3  -1   0  218.08   15.00
   3   1   0  214.68   15.30
   3   1   0  213.98   15.80
  -4  -1   0  249.68   15.60
  -4  -1   0  224.08   16.10
   4   1   0  196.88   16.80
   4   1   0  202.48   16.10
   5   1   0  984.10   70.09
   5   1   0 1053.59   70.99
  -6  -1   0  363.06   22.10
   6   1   0  303.07   24.50
   6   1   0  249.18   22.70
   7   1   0  440.86   32.00
   7   1   0  380.96   30.10
   8   1   0  218.88   20.20
   8   1   0  188.38   17.30
   9   1   0    4.30    7.50
   9   1   0    7.50    6.20
  10   1   0   72.79    9.90
  10   1   0   60.19   12.30
  11   1   0  134.69   17.60
  11   1   0  115.39   15.30
  12   1   0  182.38   19.30
  12   1   0  184.18   24.50
  13   1   0   20.90    9.20
  13   1   0   17.20   13.10
  14   1   0   40.70   10.80
  14   1   0   23.80   14.80
  15   1   0    4.10   15.20
  15   1   0   -8.40    9.10
  16   1   0  -11.50   16.40
  16  -2   0  -15.10   11.90
  15  -2   0    1.00   10.40
  15  -2   0   15.90    7.90
  14  -2   0    1.10    9.50
  14  -2   0   14.30    7.60
  13  -2   0   23.70    9.00
  13  -2   0   27.60    7.50
  12  -2   0    3.20    6.90
  12  -2   0    1.50    5.60
  11  -2   0  254.37   20.90
  11  -2   0  272.87   23.00
  10  -2   0  223.78   18.60
  10  -2   0  254.27   20.80
   9  -2   0  780.72   52.89
   9  -2   0  706.63   51.59
   8  -2   0    4.90    4.40
   8  -2   0    4.70    3.10
   7  -2   0   -1.90    3.60
   7  -2   0    0.70    2.60
  -7   2   0    4.70    4.00
   6  -2   0  511.15   34.60
   6  -2   0  501.55   33.70
  -6   2   0  434.26   34.10
   5  -2   0 2434.56  164.38
   5  -2   0 2537.05  164.98
  -5   2   0 2307.87  164.78
   4  -2   0  554.44   37.70
   4  -2   0  548.15   37.20
  -4   2   0  533.65   37.60
  -4   2   0  528.85   38.30
   3  -2   0 1818.32  127.39
   3  -2   0 1765.22  127.59
  -3   2   0 2064.49  127.69
   2  -2   0   19.90    2.40
  -2   2   0   20.30    2.70
   1  -2   0  350.56   24.40
  -1   2   0  358.56   24.40
   0  -2   0    1.80    1.00
   0  -2   0    2.80    1.00
   0   2   0    5.10    1.30
  -1  -2   0   18.30    2.00
  -1  -2   0   16.90    2.40
   1   2   0   11.80    1.80
   1   2   0   12.10    2.00
  -2  -2   0  330.77   23.40
  -2  -2   0  348.17   23.30
   2   2   0  342.17   23.40
   2   2   0  322.27   23.60
  -3  -2   0   48.00    4.20
  -3  -2   0   50.69    4.60
   3   2   0   46.40    4.80
   3   2   0   47.50    5.30
  -4  -2   0  151.98   10.90
  -4  -2   0  144.09   11.20
   4   2   0  151.58   11.60
   4   2   0  143.49   12.20
  -5  -2   0  849.32   56.19
   5   2   0  789.82   56.99
   5   2   0  825.72   57.89
  -6  -2   0  283.47   17.80
   6   2   0  229.18   20.60
   6   2   0  211.48   19.00
  -7  -2   0  144.39   10.30
   7   2   0  110.39   12.10
   7   2   0   92.89   14.20
   8   2   0   10.20    5.60
   8   2   0   10.10    7.50
   9   2   0  159.18   16.00
   9   2   0  148.19   20.70
  10   2   0  455.35   34.90
  10   2   0  446.16   39.40
  11   2   0   99.19   13.10
  11   2   0  115.19   18.00
  12   2   0  137.29   17.30
  12   2   0  126.99   19.80
  13   2   0  -12.90   13.60
  13   2   0    0.90    9.60
  14   2   0    0.10    9.70
  15   2   0   27.50   10.60
  15   2   0   22.60   17.80
  16   2   0   -0.40   17.70
  16  -3   0   56.29   13.60
  15  -3   0   20.60    7.80
  15  -3   0   -1.30   10.10
  14  -3   0   54.99    8.80
  14  -3   0   46.40   10.70
  13  -3   0  159.48   16.20
  13  -3   0  155.78   18.30
  12  -3   0   60.79    9.60
  12  -3   0   67.99    8.20
  11  -3   0   81.99   10.10
  11  -3   0  102.39   13.10
  10  -3   0  631.04   44.30
  10  -3   0  629.54   45.50
   9  -3   0  102.99   11.40
   9  -3   0   99.29    9.40
   8  -3   0    6.40    3.10
   8  -3   0    0.50    3.50
   7  -3   0  111.09   10.10
   7  -3   0  103.29    8.80
  -7   3   0   85.99   10.40
   6  -3   0  110.39    9.00
   6  -3   0  123.99   10.20
  -6   3   0   99.19   10.40
   5  -3   0  203.08   14.50
   5  -3   0  205.28   15.20
  -5   3   0  192.88   15.30
   4  -3   0  182.08   13.40
   4  -3   0  168.98   12.90
  -4   3   0  187.38   13.60
   3  -3   0  465.35   33.30
  -3   3   0  501.15   33.60
   2  -3   0    2.50    1.50
  -2   3   0    4.90    1.80
   1  -3   0  550.64   38.20
  -1   3   0  559.44   38.20
   0  -3   0  188.58   13.60
   0  -3   0  175.38   13.20
   0  -3   0  194.58   13.30
   0   3   0  171.68   13.50
  -1  -3   0    5.10    2.00
  -1  -3   0    4.50    0.80
  -1  -3   0    5.00    1.70
   1   3   0    2.00    2.00
   1   3   0    4.30    1.80
  -2  -3   0  514.85   34.10
  -2  -3   0  500.65   34.30
   2   3   0  505.95   34.20
   2   3   0  449.76   34.40
  -3  -3   0 1355.86   89.49
  -3  -3   0 1361.16   89.69
   3   3   0 1309.07   89.69
   3   3   0 1231.58   89.89
  -4  -3   0  128.09   10.40
  -4  -3   0  128.19   10.00
   4   3   0  136.29   10.90
   4   3   0  134.99   11.40
  -5  -3   0   34.10    4.30
   5   3   0   26.10    5.10
   5   3   0   36.70    5.20
  -6  -3   0  559.44   37.90
   6   3   0  572.44   40.60
   6   3   0  509.35   39.10
   7   3   0   47.90    8.90
   7   3   0   47.10    7.10
   8   3   0  132.19   17.40
   8   3   0  115.09   13.30
   9   3   0   -3.90    5.80
   9   3   0   -7.30    9.10
  10   3   0  -23.30   10.60
  10   3   0   -2.60    6.60
  11   3   0   80.59   12.70
  11   3   0   97.79   18.40
  12   3   0    8.70    8.70
  12   3   0  -12.80   14.40
  13   3   0    1.80   15.50
  13   3   0   13.00   10.50
  14   3   0   65.69   12.20
  14   3   0   53.39   19.90
  15   3   0  -15.30   17.10
  15   3   0    2.20   10.80
  16   3   0  -30.80   19.80
  16  -4   0   16.20   11.40
  15  -4   0    7.90    7.10
  15  -4   0    5.50    9.10
  14  -4   0   29.50    7.30
  14  -4   0   26.00    9.10
  13  -4   0   50.09    9.00
  13  -4   0   42.90    7.60
  12  -4   0   12.90    7.00
  12  -4   0   20.00    5.30
  11  -4   0  374.56   29.60
  11  -4   0  388.46   27.90
  10  -4   0   23.70    5.60
  10  -4   0   24.00    4.50
   9  -4   0    0.70    4.10
   9  -4   0    2.10    3.20
   8  -4   0   47.60    6.40
   8  -4   0   47.80    6.20
   7  -4   0   80.79    8.80
   7  -4   0   81.49    7.50
   6  -4   0  378.76   27.80
   6  -4   0  394.36   27.20
  -6   4   0  384.86   28.40
   5  -4   0    6.60    2.30
   5  -4   0    4.70    2.50
  -5   4   0    3.90    3.40
   4  -4   0   75.99    6.60
  -4   4   0   75.59    7.40
   3  -4   0   66.29    6.30
  -3   4   0   81.39    6.90
   2  -4   0  371.96   26.10
  -2   4   0  373.56   26.30
   1  -4   0   57.99    5.50
  -1   4   0   59.49    5.50
   0  -4   0  123.89    9.40
   0  -4   0  115.39    9.70
   0  -4   0  116.49    9.20
   0   4   0  113.89    9.70
  -1  -4   0   84.29    7.70
  -1  -4   0   89.89    7.30
  -1  -4   0   83.49    6.20
   1   4   0   88.19    8.00
   1   4   0   87.99    7.40
  -2  -4   0 4342.07  271.07
  -2  -4   0 4148.79  270.67
   2   4   0 3873.41  271.17
   2   4   0 3903.81  269.87
   2   4   0 3737.43  270.77
  -3  -4   0   75.29    6.50
  -3  -4   0   72.79    7.20
   3   4   0   67.99    7.10
   3   4   0   63.99    7.40
  -4  -4   0  381.06   25.70
   4   4   0  333.87   26.60
   4   4   0  368.16   26.30
  -5  -4   0  614.84   43.40
   5   4   0  642.24   44.50
   5   4   0  627.74   44.90
  -6  -4   0  451.95   35.70
   6   4   0  554.44   37.40
   6   4   0  554.14   38.60
   7   4   0    9.30    6.50
   7   4   0   -0.70    4.70
   8   4   0   -3.70    5.60
   8   4   0    6.70    8.30
   9   4   0   -9.20    8.30
   9   4   0    3.70    6.40
  10   4   0   22.70    8.40
  10   4   0    4.20   12.20
  11   4   0  151.18   23.60
  11   4   0  177.28   19.40
  12   4   0   27.10   17.10
  12   4   0   61.89   12.00
  13   4   0  -23.70   14.50
  13   4   0   29.60   11.00
  14   4   0   -8.90   17.80
  14   4   0    1.10   10.50
  15   4   0  -22.60   18.30
  15   4   0  -12.40   11.60
  16   4   0  -53.19   21.60
  16  -5   0   -3.00   10.00
  15  -5   0    5.50    8.90
  15  -5   0   15.10    7.60
  14  -5   0   28.90    6.70
  14  -5   0   26.00    8.70
  13  -5   0    3.90    6.40
  13  -5   0    3.80    5.40
  12  -5   0  102.49   14.10
  12  -5   0  121.69   12.00
  11  -5   0    1.70    5.70
  11  -5   0    0.50    4.00
  10  -5   0    2.10    5.00
  10  -5   0    2.40    3.80
   9  -5   0   68.69    9.20
   9  -5   0   61.69    7.50
   8  -5   0   15.70    4.90
   8  -5   0   18.50    3.70
   7  -5   0    2.50    2.60
   7  -5   0    4.70    3.60
   6  -5   0  305.17   22.80
   6  -5   0  310.07   22.20
   5  -5   0    2.30    2.50
   5  -5   0    1.50    2.90
  -5   5   0    5.50    4.00
   4  -5   0 1098.49   75.59
  -4   5   0 1111.89   76.09
   3  -5   0 1321.87   93.09
  -3   5   0 1408.76   93.49
   2  -5   0   52.79    5.80
  -2   5   0   57.59    6.10
   1  -5   0 1197.48   90.59
   1  -5   0 1512.55   91.69
  -1   5   0 1282.47   90.69
   0  -5   0   45.40    5.10
   0  -5   0   51.59    5.90
   0  -5   0   43.40    5.30
  -1  -5   0  267.57   19.20
  -1  -5   0  247.58   17.60
  -1  -5   0  271.77   18.70
   1   5   0  234.38   18.60
   1   5   0  254.97   19.30
  -2  -5   0   13.60    3.10
  -2  -5   0    9.90    3.50
   2   5   0   12.70    3.40
   2   5   0    3.80    3.20
  -3  -5   0  184.98   13.50
  -3  -5   0  177.28   14.20
   3   5   0  169.18   13.90
   3   5   0  168.18   14.60
   3   5   0  169.08   12.10
  -4  -5   0 1100.99   73.19
   4   5   0 1024.20   74.09
   4   5   0 1068.89   73.79
  -5  -5   0    4.40    2.30
   5   5   0    7.70    4.00
   5   5   0   15.50    5.00
   6   5   0   13.20    6.00
   6   5   0   10.90    5.00
   7   5   0  562.34   41.80
   7   5   0  573.64   42.90
   8   5   0  321.67   26.90
   8   5   0  234.78   22.70
   9   5   0   94.79   15.20
   9   5   0  106.99   13.10
  10   5   0   53.09   15.50
  10   5   0   81.99   12.20
  11   5   0   28.20   10.40
  11   5   0   10.30   14.60
  12   5   0    8.40   10.50
  12   5   0  -36.50   13.90
  13   5   0  -41.20   16.80
  13   5   0   -3.90   10.40
  14   5   0  -27.00   20.60
  14   5   0   31.00   12.70
  15   5   0   35.70   14.20
  15   5   0  -20.60   22.00
  16   5   0  -53.69   22.70
  16  -6   0    8.50   10.20
  15  -6   0   23.60    7.70
  15  -6   0   23.60    9.60
  14  -6   0   13.40    6.40
  14  -6   0   16.70    8.50
  13  -6   0    3.20    5.00
  13  -6   0   10.20    6.70
  12  -6   0  119.59   12.50
  12  -6   0  131.29   15.10
  11  -6   0   84.19    9.40
  11  -6   0   61.09    9.00
  10  -6   0   -1.60    5.00
  10  -6   0   -1.50    3.90
   9  -6   0  126.39   12.50
   9  -6   0  117.99   10.80
   8  -6   0  355.16   26.00
   8  -6   0  330.27   24.70
   7  -6   0    8.30    3.60
   7  -6   0    9.50    3.40
   6  -6   0  374.86   26.30
   6  -6   0  359.36   27.10
   5  -6   0 2231.28  151.68
   4  -6   0  519.25   36.50
   3  -6   0  914.41   62.49
  -3   6   0  897.71   62.79
   2  -6   0 2618.44  171.78
  -2   6   0 2436.96  171.88
   1  -6   0    0.00    3.30
   1  -6   0   -2.90    2.50
   0  -6   0   28.00    4.20
   0  -6   0   36.30    5.10
   0  -6   0   31.80    5.00
   0   6   0   26.20    4.70
  -1  -6   0  890.11   61.79
  -1  -6   0  885.51   60.69
  -1  -6   0  870.71   62.19
   1   6   0  898.21   62.49
   1   6   0  925.31   61.99
  -2  -6   0  480.85   31.40
  -2  -6   0  398.26   31.70
   2   6   0  441.76   32.20
   2   6   0  432.46   31.40
  -3  -6   0 3888.31  260.37
   3   6   0 3794.52  261.27
   3   6   0 3838.72  260.67
   4   6   0   43.10    3.90
   4   6   0   37.60    6.30
   4   6   0   39.40    6.20
   5   6   0   61.09    8.10
   5   6   0   52.59    8.00
   6   6   0   70.99    9.70
   6   6   0   49.40    8.60
   7   6   0   35.10    8.30
   7   6   0   35.30    7.50
   8   6   0  343.37   29.50
   8   6   0  297.07   26.30
   9   6   0  399.76   36.10
   9   6   0  555.14   41.50
  10   6   0   81.09   17.30
  10   6   0   50.49   11.10
  11   6   0    7.30   15.10
  11   6   0   35.60   11.70
  12   6   0   53.09   12.90
  12   6   0   16.20   17.50
  13   6   0  -48.10   18.70
  13   6   0    3.50   11.10
  14   6   0  -51.39   21.80
  14   6   0   -0.20   12.70
  15   6   0   61.49   16.20
  15   6   0   56.19   28.20
  16  -7   0   38.30   13.70
  16  -7   0   19.20   11.30
  15  -7   0   16.00    9.60
  15  -7   0   12.70    7.00
  14  -7   0   53.89    8.50
  14  -7   0   54.49   10.00
  13  -7   0   23.70    7.90
  13  -7   0   25.00    6.20
  12  -7   0   46.40    8.70
  12  -7   0   80.09    9.50
  11  -7   0  166.18   16.80
  11  -7   0  167.08   15.00
  10  -7   0   -3.30    5.10
  10  -7   0    2.50    4.10
   9  -7   0   50.49    7.60
   9  -7   0   63.89    7.80
   8  -7   0  202.38   15.80
   8  -7   0  192.68   16.90
   7  -7   0  181.68   14.20
   7  -7   0  172.08   15.50
   6  -7   0 1127.79   77.59
   5  -7   0  389.86   28.20
   4  -7   0    2.60    3.00
   3  -7   0  919.81   63.69
   2  -7   0  328.37   24.20
   1  -7   0    0.20    3.20
   0  -7   0  546.05   39.70
   0   7   0  572.74   40.40
  -1  -7   0  102.09    7.60
   1   7   0   91.49   10.20
  -2  -7   0   10.50    1.60
   2   7   0   10.30    4.10
   2   7   0    6.20    4.40
   3   7   0  551.84   39.50
   3   7   0  545.35   40.20
   4   7   0   15.00    4.80
   4   7   0    3.70    4.40
   5   7   0  199.58   18.30
   5   7   0  197.38   17.10
   5   7   0  189.98   14.00
   6   7   0 1444.66  100.99
   6   7   0 1432.76  100.09
   7   7   0    4.80    6.90
   7   7   0    7.60    6.10
   8   7   0  254.57   24.70
   8   7   0  310.77   27.20
   9   7   0  127.19   17.90
   9   7   0   99.29   13.60
  10   7   0  325.17   31.50
  10   7   0  403.76   37.20
  11   7   0    0.10   14.60
  11   7   0   28.70   11.20
  12   7   0  103.49   24.10
  12   7   0  148.39   18.60
  13   7   0   -5.80   12.20
  13   7   0  -35.90   19.10
  14   7   0   29.50   15.10
  14   7   0   -8.70   23.20
  15   7   0  -40.00   24.30
  15   7   0   19.00   14.80
  16  -8   0   18.80   10.90
  16  -8   0   11.60   12.40
  15  -8   0   77.99   12.90
  15  -8   0   91.79   11.00
  14  -8   0  125.49   17.90
  14  -8   0  135.39   14.60
  13  -8   0    5.10    5.80
  13  -8   0  -17.20    6.40
  12  -8   0   12.30    5.70
  12  -8   0   11.30    7.20
  11  -8   0   47.50    8.20
  11  -8   0   44.70    6.90
  10  -8   0   23.30    5.40
  10  -8   0   15.60    6.20
   9  -8   0  207.08   16.60
   9  -8   0  207.28   18.00
   8  -8   0   38.90    7.00
   8  -8   0   49.30    6.50
   7  -8   0  263.27   19.90
   7  -8   0  246.68   21.10
   6  -8   0 1106.99   76.49
   5  -8   0  184.98   15.10
   4  -8   0  518.25   37.10
   3  -8   0  671.23   47.40
   2  -8   0   65.29    8.30
   1  -8   0 1340.57   92.39
   0  -8   0  425.76   30.20
   0   8   0  393.26   30.90
  -1  -8   0  506.65   34.40
  -1  -8   0  493.95   36.10
   1   8   0  491.65   36.90
  -2  -8   0  374.56   25.90
   2   8   0  387.76   28.30
   2   8   0  370.96   29.20
   3   8   0 1399.86   95.39
   3   8   0 1353.96   96.19
   4   8   0  376.16   30.60
   4   8   0  400.56   29.60
   5   8   0  800.42   56.09
   5   8   0  760.32   56.59
   6   8   0   33.60    4.10
   6   8   0   36.40    8.00
   6   8   0   22.70    8.10
   7   8   0  159.48   18.90
   7   8   0  160.18   17.70
   8   8   0  937.31   68.49
   8   8   0  890.41   66.39
   9   8   0  335.27   31.90
   9   8   0  414.46   36.00
  10   8   0   55.59   12.70
  10   8   0   76.89   17.30
  11   8   0   94.79   20.70
  12   8   0  -33.80   17.70
  12   8   0   -0.60   12.30
  13   8   0    3.20   13.50
  13   8   0  -37.40   21.30
  14   8   0   -1.30   14.50
  15   8   0  -62.19   27.80
  15   8   0   26.10   16.70
  15  -9   0  154.08   17.10
  15  -9   0  168.48   22.00
  14  -9   0   14.00    8.90
  14  -9   0   20.90    7.10
  13  -9   0   -1.40    6.30
  13  -9   0    0.50    7.30
  12  -9   0   10.50    7.60
  12  -9   0    6.30    6.00
  11  -9   0  237.88   20.30
  11  -9   0  277.97   23.10
  10  -9   0  113.29   12.10
  10  -9   0  121.29   14.80
   9  -9   0    4.80    4.70
   9  -9   0   -2.60    5.80
   8  -9   0    8.00    5.80
   8  -9   0   18.80    5.20
   7  -9   0   64.69    8.90
   6  -9   0  416.26   30.50
   5  -9   0    5.90    4.30
   4  -9   0   30.10    5.70
   3  -9   0  147.79   13.40
   2  -9   0   17.30    5.00
   1  -9   0  396.16   29.30
   0  -9   0  148.49   13.80
   0   9   0  163.38   14.90
  -1  -9   0  944.41   67.89
  -1  -9   0  981.70   66.29
   1   9   0  982.70   68.99
  -2  -9   0  678.73   47.00
   2   9   0  705.03   50.59
   3   9   0  330.47   27.40
   3   9   0  347.67   26.60
   4   9   0  486.35   37.10
   4   9   0  508.75   38.40
   5   9   0  287.67   26.30
   5   9   0  310.27   25.00
   6   9   0    9.60    6.70
   6   9   0   -3.30    6.50
   7   9   0  151.88   20.90
   7   9   0  179.48   13.60
   7   9   0  208.88   19.60
   8   9   0   17.30    9.40
   8   9   0    9.70    4.70
   8   9   0    8.70    9.50
   9   9   0   79.69   15.00
   9   9   0   51.69   11.60
  10   9   0  187.78   24.30
  10   9   0  136.99   18.30
  11   9   0   63.49   17.70
  11   9   0   38.00   13.40
  12   9   0   15.80   20.70
  12   9   0   10.20   13.50
  13   9   0  -22.20   21.80
  13   9   0  -20.90   13.80
  14   9   0    1.20   15.30
  15 -10   0   42.50   12.60
  15 -10   0   53.89    9.50
  14 -10   0   -6.20    9.00
  14 -10   0   -7.40    6.80
  13 -10   0   73.69   12.10
  13 -10   0   64.39    9.90
  12 -10   0   14.30    7.90
  12 -10   0    0.50    6.30
  11 -10   0  122.59   13.70
  11 -10   0  143.69   16.70
  10 -10   0    9.80    5.40
  10 -10   0   12.60    7.30
   9 -10   0   87.89   11.50
   9 -10   0   87.79   11.20
   8 -10   0  618.94   43.30
   8 -10   0  582.24   44.70
   7 -10   0    3.00    5.10
   6 -10   0  365.66   27.50
   5 -10   0  116.89   12.20
   4 -10   0    4.10    4.40
   3 -10   0  179.98   16.10
   2 -10   0  231.58   19.30
   1 -10   0  397.36   29.90
   0 -10   0  177.78   13.80
   0 -10   0  187.28   16.30
   0  10   0  176.08   17.70
  -1 -10   0   92.69    8.40
  -1 -10   0  113.19   12.10
   1  10   0   94.19   12.50
  -2 -10   0  440.06   33.00
  -2 -10   0  438.16   30.10
   2  10   0  424.66   34.10
   3  10   0   -1.60    5.20
   3  10   0    9.60    6.20
   4  10   0  184.58   17.70
   4  10   0  174.28   18.60
   5  10   0   15.00    7.90
   5  10   0    0.80    6.30
   6  10   0  259.77   23.20
   6  10   0  222.88   23.70
   7  10   0    1.50    8.20
   7  10   0    6.50    7.80
   8  10   0   29.80   11.90
   8  10   0   20.90    9.70
   9  10   0  225.48   29.10
   9  10   0  259.07   19.00
   9  10   0  220.78   25.40
  10  10   0   -6.90    7.10
  10  10   0   14.00   11.30
  10  10   0    7.80   14.00
  11  10   0    2.20   17.20
  11  10   0   -7.00   12.30
  12  10   0   25.20   22.50
  12  10   0    0.40   13.30
  13  10   0   12.30   24.10
  13  10   0   76.19   17.40
  14  10   0   67.29   33.40
  14  10   0   99.59   20.00
  15 -11   0   13.40    8.60
  15 -11   0    4.60   11.30
  14 -11   0   39.30   11.60
  14 -11   0   40.90    9.30
  13 -11   0    3.30    9.20
  13 -11   0    1.30    7.10
  12 -11   0    6.30    8.70
  12 -11   0   -9.20    6.10
  11 -11   0  191.98   18.70
  11 -11   0  251.67   22.40
  10 -11   0  142.79   15.50
  10 -11   0  161.88   18.00
   9 -11   0    7.60    7.10
   9 -11   0    4.10    5.70
   8 -11   0   86.69   11.40
   7 -11   0   75.49   10.70
   6 -11   0   13.20    5.60
   5 -11   0  343.87   26.90
   4 -11   0   66.09    9.10
   3 -11   0   14.60    5.50
   2 -11   0   52.99    7.80
   1 -11   0   27.00    6.60
   0 -11   0    0.90    3.60
   0 -11   0    6.90    5.50
  -1 -11   0   38.40    4.80
  -1 -11   0   27.10    7.00
   1  11   0   20.90    7.00
  -2 -11   0   53.19    8.40
  -2 -11   0   55.79    5.50
   2  11   0   45.80    9.60
   3  11   0   12.30    7.30
   4  11   0   85.29   11.80
   4  11   0   76.09   11.90
   5  11   0  161.88   18.50
   5  11   0  169.68   19.70
   6  11   0  324.67   26.80
   6  11   0  260.67   28.00
   7  11   0   11.40   10.20
   7  11   0   17.50    8.90
   8  11   0   19.80   10.80
   8  11   0   30.70   12.30
   9  11   0   20.50   13.20
   9  11   0   -2.20   11.00
  10  11   0   26.40   12.70
  10  11   0   23.60   14.70
  11  11   0    5.30   16.00
  11  11   0   -2.30   13.10
  12  11   0  191.88   31.80
  12  11   0  131.99   21.80
  13  11   0    5.80   25.40
  13  11   0  -17.40   15.10
  14  11   0   27.30   18.40
  14  11   0  -34.60   30.90
  15 -12   0   17.10   12.00
  14 -12   0   27.90    9.70
  14 -12   0   25.80   11.30
  13 -12   0   35.60   11.30
  13 -12   0   18.80    8.40
  12 -12   0   32.80    8.10
  12 -12   0   38.20   10.50
  11 -12   0    7.00    6.50
  11 -12   0    1.40    8.60
  10 -12   0   47.80    8.30
  10 -12   0   25.70    9.50
   9 -12   0   58.19   11.20
   9 -12   0   60.59    9.20
   8 -12   0   -0.60    6.20
   7 -12   0   17.40    6.10
   6 -12   0   85.29   11.70
   5 -12   0  249.08   21.30
   4 -12   0 1149.78   80.79
   3 -12   0 1258.27   87.99
   2 -12   0  138.19   14.50
   1 -12   0   -3.20    5.50
   0 -12   0   49.60    6.40
   0 -12   0   42.40    8.00
  -1 -12   0   43.20    5.60
  -1 -12   0   42.80    8.80
   1  12   0   29.00    9.10
  -2 -12   0   18.30    7.00
  -2 -12   0   14.10    3.50
   2  12   0   12.20    7.40
  -3 -12   0   15.60    7.50
   3  12   0   21.80    7.60
   4  12   0   11.90    7.50
   5  12   0  103.39   15.30
   5  12   0  112.69   16.10
   6  12   0  145.39   18.20
   6  12   0   96.19   15.50
   7  12   0   24.50   11.40
   7  12   0   23.00   10.20
   8  12   0  104.19   16.30
   8  12   0  110.59   17.50
   9  12   0   56.19   14.10
   9  12   0   58.89   16.10
  10  12   0    6.30   15.00
  10  12   0   -9.00   12.70
  11  12   0   83.79   19.50
  11  12   0  138.49   23.90
  12  12   0   23.30   16.10
  12  12   0   33.30   24.00
  13  12   0   24.00   28.50
  13  12   0   -1.10   16.80
  14 -13   0   32.60   10.00
  14 -13   0   30.10   12.60
  13 -13   0   15.70    8.60
  13 -13   0   22.40   11.10
  12 -13   0   14.60   11.00
  12 -13   0   22.30    8.20
  11 -13   0    4.40    7.30
  11 -13   0    7.90    9.90
  10 -13   0    8.40    7.10
  10 -13   0    9.00    8.70
   9 -13   0   69.79   10.20
   9 -13   0   72.79   12.00
   8 -13   0  132.99   15.40
   7 -13   0  447.66   34.50
   6 -13   0    2.30    5.90
   5 -13   0  326.47   26.80
   4 -13   0 1071.69   75.89
   3 -13   0   16.70    7.20
   2 -13   0    3.50    5.60
   1 -13   0    0.50    5.60
   0 -13   0   10.10    5.00
   0 -13   0   14.40    7.40
  -1 -13   0  314.27   27.20
  -1 -13   0  338.57   24.20
   1  13   0  322.57   29.60
  -2 -13   0   -0.60    6.80
  -2 -13   0   -1.00    3.40
   2  13   0   -3.10    7.80
  -3 -13   0  130.19   16.90
   3  13   0  142.29   19.80
  -4 -13   0  286.57   25.10
   4  13   0  270.57   27.60
   5  13   0    1.30    7.80
   6  13   0    9.40   10.20
   6  13   0   14.70   10.70
   7  13   0  224.98   25.70
   7  13   0  177.78   26.00
   8  13   0   20.10   12.40
   8  13   0   18.40   12.70
   9  13   0   37.50   15.10
   9  13   0   21.10   13.10
  10  13   0   16.40   14.60
  10  13   0   25.30   16.90
  11  13   0   10.00   15.30
  11  13   0    5.80   18.30
  12  13   0    5.70   17.30
  12  13   0  -62.69   22.70
  13  13   0   -2.80   18.80
  13  13   0   53.79   31.20
  14 -14   0   26.50   10.60
  14 -14   0   11.80   13.40
  13 -14   0   32.40   12.20
  13 -14   0   21.30    9.30
  12 -14   0   52.39   13.00
  12 -14   0   42.90   10.00
  11 -14   0   21.30   11.20
  11 -14   0   -3.20    7.40
  10 -14   0   65.79   10.60
  10 -14   0   59.49   11.70
   9 -14   0  122.89   16.10
   8 -14   0  147.69   16.80
   7 -14   0  107.89   14.50
   6 -14   0  235.18   21.80
   5 -14   0   22.80    7.90
   4 -14   0   12.80    8.10
   3 -14   0   10.20    7.00
   2 -14   0  141.29   16.30
   1 -14   0   18.60    8.30
   0 -14   0  892.71   71.59
   0 -14   0 1206.58   74.89
  -1 -14   0   38.40   10.20
  -1 -14   0   59.59    7.30
   1  14   0   48.80   12.30
  -2 -14   0   74.59    7.70
  -2 -14   0   72.09   12.10
   2  14   0   58.29   12.50
  -3 -14   0    7.00    8.80
   3  14   0   -1.20    9.50
  -4 -14   0   33.90    9.70
   4  14   0   33.60   11.90
  -5 -14   0   66.09   12.70
   5  14   0   68.59   14.20
   6  14   0  825.32   63.89
   7  14   0   29.00   12.50
   8  14   0   12.00   12.70
   8  14   0   12.90   13.00
   9  14   0  108.69   20.00
   9  14   0   55.39   17.10
  10  14   0   -6.10   15.70
  10  14   0   10.40   16.70
  11  14   0  -44.90   15.80
  11  14   0   24.50   22.50
  12  14   0   93.99   26.90
  12  14   0   43.80   20.60
  13 -15   0   -9.20   12.30
  13 -15   0   -2.60    9.00
  12 -15   0    1.80   11.80
  12 -15   0    2.60    8.80
  11 -15   0   95.29   15.70
  11 -15   0   80.09   12.10
  10 -15   0   53.39   12.70
  10 -15   0   32.80    9.80
   9 -15   0   48.80   10.40
   8 -15   0   63.59   11.30
   7 -15   0   21.30    8.60
   6 -15   0   46.90    9.80
   5 -15   0   35.20    9.60
   4 -15   0   29.50    9.60
   3 -15   0  200.98   21.30
   2 -15   0  146.29   18.70
   1 -15   0   18.20    8.80
   0 -15   0   -0.80    7.60
  -1 -15   0   -5.10    8.10
  -1 -15   0   -5.80    5.70
  -2 -15   0   47.70   10.40
  -2 -15   0   55.49    7.10
   2  15   0   54.39   13.20
  -3 -15   0    8.40    9.00
   3  15   0   21.10   11.40
  -4 -15   0  212.58   23.30
   4  15   0  249.68   26.20
  -5 -15   0  535.25   43.30
   5  15   0  525.15   45.50
  -6 -15   0   12.50   11.20
   6  15   0   17.30   12.20
  -7 -15   0   68.29   15.20
   7  15   0   62.19   15.70
   8  15   0   61.49   16.50
   9  15   0   67.79   20.70
  10  15   0    9.40   19.60
  11  15   0   49.00   24.90
  13 -16   0   15.90   12.90
  12 -16   0   11.80   10.10
  12 -16   0   27.00   14.00
  11 -16   0   67.79   11.90
  11 -16   0   47.10   14.60
  10 -16   0   74.79   14.50
  10 -16   0   64.29   12.20
   9 -16   0   -7.40    8.70
   8 -16   0   29.10    9.80
   7 -16   0   59.79   10.80
   6 -16   0    1.10    8.30
   5 -16   0  183.88   20.70
   4 -16   0    7.00    8.70
   3 -16   0  174.98   19.70
   2 -16   0    7.30    8.60
   1 -16   0   -0.50    8.60
   0 -16   0   77.39   13.30
  -1 -16   0   -2.00    8.20
  -1 -16   0   10.40    7.60
  -2 -16   0  242.58   23.70
  -2 -16   0  221.48   17.30
   2  16   0  229.48   28.30
  -3 -16   0    6.00   10.70
   3  16   0   17.30   12.50
  -4 -16   0  101.19   15.70
   4  16   0   94.39   17.80
  -5 -16   0   20.20   12.40
   5  16   0   27.20   12.00
  -6 -16   0   20.60   12.50
   6  16   0   36.40   14.30
  -7 -16   0   78.89   15.80
   7  16   0   46.10   16.80
  -8 -16   0   -1.00   13.40
   8  16   0   20.40   16.30
  -9 -16   0    5.10   14.50
   9  16   0   16.20   18.30
 -10 -16   0   -6.90   15.50
  10  16   0   12.60   20.40
 -11 -16   0  -35.70   15.60
  11  16   0   36.00   25.80
  12 -17   0   63.49   12.90
  12 -17   0   30.20   15.30
  11 -17   0    9.40   13.40
  11 -17   0    9.20   10.10
  10 -17   0    6.00   10.10
  10 -17   0   14.50   12.30
   9 -17   0    2.00    9.80
   8 -17   0   57.39   12.20
   7 -17   0  138.09   17.10
   6 -17   0   27.90   10.50
   5 -17   0  150.68   20.20
   4 -17   0   12.70    9.20
   3 -17   0   32.70   11.00
   2 -17   0   64.59   13.10
   1 -17   0  141.09   20.50
   0 -17   0   14.60    9.40
  -1 -17   0    2.90    9.50
  -2 -17   0    7.80    9.80
   2  17   0   -8.30   11.00
  -3 -17   0   19.00   10.50
   3  17   0   11.40   14.50
  -4 -17   0  367.36   34.40
   4  17   0  361.76   37.60
  -5 -17   0  -17.20   11.60
   5  17   0   21.10   13.40
  -6 -17   0   62.59   14.90
   6  17   0   25.50   15.70
  -7 -17   0    3.10   13.90
   7  17   0   19.30   16.20
  -8 -17   0   50.29   16.80
   8  17   0   46.70   20.00
  -9 -17   0   73.59   19.30
   9  17   0   65.49   21.30
 -10 -17   0   26.10   17.40
  10  17   0   27.10   21.20
  11 -18   0   66.09   13.80
  11 -18   0   64.19   15.50
  10 -18   0   20.40   11.40
   9 -18   0   11.20   11.40
   8 -18   0   42.90   12.10
   7 -18   0   53.49   13.10
   6 -18   0   68.99   12.90
   5 -18   0  360.96   32.70
   4 -18   0   44.00   11.60
   3 -18   0    7.40   11.10
   2 -18   0   34.10   12.60
   1 -18   0   29.20   11.70
   0 -18   0  224.28   26.00
  -1 -18   0   27.30   12.40
  -2 -18   0   21.80   11.50
  -3 -18   0  116.49   17.90
   3  18   0   81.79   18.40
  -4 -18   0   -2.40   11.50
   4  18   0   22.90   15.00
  -5 -18   0   66.89   15.40
   5  18   0   65.79   16.70
  -6 -18   0   -1.30   13.60
   6  18   0   -4.90   14.40
  -7 -18   0    5.20   15.20
   7  18   0    4.90   16.40
  -8 -18   0   44.80   17.90
   8  18   0   28.50   20.10
  -9 -18   0   57.99   20.30
   9  18   0   38.10   21.70
  10 -19   0   17.90   12.70
   9 -19   0  165.68   20.60
   8 -19   0   -4.40   10.80
   7 -19   0   26.80   12.60
   6 -19   0  223.78   26.70
   5 -19   0   22.80   12.50
   4 -19   0  -16.20   10.50
   3 -19   0  111.89   16.40
   2 -19   0   55.19   14.10
   1 -19   0   14.40   11.70
   0 -19   0    8.00   11.10
  -1 -19   0    9.60   12.20
  -2 -19   0   27.20   13.40
  -3 -19   0  120.39   19.40
   3  19   0   95.09   19.90
  -4 -19   0   25.40   15.30
   4  19   0   29.00   17.00
  -5 -19   0   28.60   16.20
   5  19   0   51.49   18.50
  -6 -19   0    2.30   14.90
   6  19   0   16.00   18.10
  -7 -19   0   -2.00   16.70
   7  19   0    8.20   17.70
  -8 -19   0   14.00   17.90
   8  19   0   -4.60   18.60
   9 -20   0   64.69   15.90
   8 -20   0   -6.20   12.00
   7 -20   0   -3.10   12.10
   6 -20   0   19.10   12.80
   5 -20   0   38.50   14.40
   4 -20   0   -8.30   13.20
   3 -20   0   23.00   14.10
   2 -20   0   70.49   16.40
   1 -20   0   -1.30   12.10
   0 -20   0   18.40   14.00
  -1 -20   0   18.90   12.90
  -2 -20   0  126.59   19.40
  -3 -20   0   24.90   14.80
  -4 -20   0   91.49   20.20
   4  20   0  148.29   25.30
  -5 -20   0    2.20   15.70
   5  20   0    7.70   18.50
  -6 -20   0   49.40   18.10
   6  20   0   72.99   23.50
  -7 -20   0   71.79   21.90
   7  20   0   50.49   23.10
   8 -21   0   13.80   14.30
   7 -21   0    4.50   14.10
   6 -21   0   28.30   14.30
   5 -21   0   -9.10   13.60
   4 -21   0    9.80   13.20
   3 -21   0  186.58   24.30
   2 -21   0   10.50   14.20
   1 -21   0    7.30   15.20
   0 -21   0   22.60   15.70
  -1 -21   0   86.69   19.00
  -2 -21   0   14.10   15.00
  -3 -21   0  101.79   20.30
  -4 -21   0   11.40   16.20
  -5 -21   0   -2.50   18.50
   5  21   0    6.70   19.80
  -6 -21   0  111.89   23.90
   6  21   0  108.19   25.70
   6 -22   0   -6.30   14.50
   5 -22   0    5.70   15.00
   4 -22   0   50.39   17.80
   3 -22   0   18.30   15.50
   2 -22   0   13.90   16.00
   1 -22   0   27.10   17.20
   0 -22   0   85.99   20.50
  -1 -22   0   70.09   20.00
  -2 -22   0    1.40   15.20
  -3 -22   0    4.50   16.40
  -4 -22   0   29.00   18.40
   3 -23   0   34.30   18.30
   2 -23   0    2.20   17.90
   1 -23   0    4.20   16.40
   0 -23   0   55.19   19.80
  -1 -23   0   58.59   20.10
   1 -23   1    4.30   18.40
   2 -23   1    6.80   17.20
  -3 -22   1   29.20   18.60
  -2 -22   1   -8.20   16.80
  -1 -22   1   28.20   18.40
   0 -22   1   80.09   18.40
   1 -22   1   26.40   16.20
   2 -22   1   -0.50   15.80
   3 -22   1   -7.90   15.40
   4 -22   1    9.90   16.00
   5 -22   1  170.28   24.30
   6 -22   1  -13.80   16.10
   5  21  -1   24.10   20.40
  -5 -21   1   -5.20   18.00
   4  21  -1  149.69   27.10
  -4 -21   1  195.58   26.60
  -3 -21   1  -13.00   16.40
  -2 -21   1    2.00   15.80
  -1 -21   1   26.50   16.50
   0 -21   1   10.70   15.90
   1 -21   1   13.50   14.30
   2 -21   1   25.70   15.50
   3 -21   1   -8.90   14.20
   4 -21   1   18.50   14.50
   5 -21   1   39.30   16.20
   6 -21   1    3.60   14.60
   7 -21   1   64.69   17.70
   8 -21   1   41.10   16.00
   6  20  -1   49.40   21.80
  -6 -20   1   13.10   17.50
   5  20  -1   19.10   18.10
  -5 -20   1    8.90   16.60
   4  20  -1   -3.30   16.60
  -4 -20   1    6.20   15.80
  -3 -20   1   -6.50   14.60
  -2 -20   1   26.50   16.00
  -1 -20   1   77.99   17.10
   0 -20   1   30.10   14.50
   1 -20   1    3.50   12.60
   2 -20   1   16.00   13.20
   3 -20   1   40.50   14.50
   4 -20   1  117.19   19.00
   5 -20   1   22.90   14.40
   6 -20   1   50.39   15.40
   7 -20   1   -7.40   11.10
   8 -20   1   43.30   14.80
   9 -20   1   -8.70   13.50
   8  19  -1  -15.40   17.60
  -8 -19   1   11.90   18.60
   7  19  -1   50.69   21.30
  -7 -19   1   59.19   18.10
   6  19  -1  -16.20   15.90
  -6 -19   1   20.40   15.40
   5  19  -1    4.80   17.50
  -5 -19   1  -13.10   14.20
   4  19  -1   10.00   15.90
  -4 -19   1    7.30   13.90
   3  19  -1   34.60   16.70
  -3 -19   1   26.90   13.80
  -2 -19   1   45.80   14.60
  -1 -19   1   43.60   14.60
   0 -19   1   36.50   13.20
   1 -19   1   19.00   13.10
   2 -19   1    3.40   11.70
   3 -19   1   -4.60   11.50
   4 -19   1   -1.40   11.30
   5 -19   1   26.40   13.10
   6 -19   1   75.69   14.80
   7 -19   1   62.69   14.30
   8 -19   1   51.99   13.70
   9 -19   1    5.40   12.00
  10 -19   1   21.80   13.10
   9  18  -1   46.30   22.30
  -9 -18   1  -22.40   17.60
   8  18  -1   45.90   21.40
  -8 -18   1    2.20   16.10
   7  18  -1  -18.10   15.20
  -7 -18   1   12.30   15.40
   6  18  -1    5.20   16.60
  -6 -18   1    1.60   14.20
   5  18  -1   19.90   16.70
  -5 -18   1    7.40   13.10
   4  18  -1    8.40   14.00
  -4 -18   1  -11.10   11.10
   3  18  -1   68.69   17.90
  -3 -18   1   91.89   16.20
   2  18  -1   62.29   16.70
  -2 -18   1   55.49   13.70
  -1 -18   1   23.70   11.20
   0 -18   1   10.20   11.10
   1 -18   1   79.39   14.70
   2 -18   1  115.59   16.90
   3 -18   1  114.69   16.30
   4 -18   1   28.60   11.30
   5 -18   1    6.80   10.70
   6 -18   1   10.60   10.80
   7 -18   1  129.89   17.40
   8 -18   1   21.90   11.20
   9 -18   1   -0.10   11.30
  10 -18   1   19.30   11.50
  11 -18   1   21.00   12.20
  11 -18   1   11.30   13.80
  10  17  -1  -41.50   23.10
 -10 -17   1   25.00   17.40
   9  17  -1   22.10   20.00
  -9 -17   1   16.20   16.30
   8  17  -1   13.10   18.00
  -8 -17   1   25.10   15.30
   7  17  -1  162.08   25.40
  -7 -17   1  185.58   24.10
   6  17  -1   24.60   15.60
  -6 -17   1   45.10   15.60
   5  17  -1   23.90   13.70
  -5 -17   1   17.60   12.10
   4  17  -1   19.40   13.20
  -4 -17   1   -2.80   10.50
   3  17  -1   26.40   14.40
  -3 -17   1   24.10   12.10
   2  17  -1    4.40   13.20
  -2 -17   1   -8.30    9.60
  -1 -17   1   19.40   10.70
   0 -17   1   17.80   11.10
   1 -17   1   97.29   14.90
   2 -17   1  426.56   36.70
   3 -17   1   13.70    9.90
   4 -17   1   18.50   10.50
   5 -17   1   78.39   13.20
   6 -17   1   -4.90    9.40
   7 -17   1   20.30   10.20
   8 -17   1   98.49   14.70
   9 -17   1    5.60    9.70
  10 -17   1    4.50   10.30
  11 -17   1   -0.50   12.70
  11 -17   1   17.60   10.80
  12 -17   1   20.50   14.00
  12 -17   1   11.70   11.10
  10  16  -1   17.10   22.70
 -10 -16   1   13.60   16.10
   9  16  -1    8.40   16.90
  -9 -16   1   -8.00   14.90
   8  16  -1  397.06   43.00
  -8 -16   1  374.96   37.90
   7  16  -1  217.88   32.00
  -7 -16   1  244.08   28.90
   6  16  -1   -0.20   11.40
  -6 -16   1    9.20   11.80
   5  16  -1   29.10   14.30
  -5 -16   1   21.40   12.00
   4  16  -1  164.88   22.60
  -4 -16   1  165.38   22.60
   3  16  -1   33.40   13.60
  -3 -16   1   19.90   10.40
   2  16  -1   56.59   14.80
  -2 -16   1   44.50   12.20
  -1 -16   1   -5.20    8.20
   0 -16   1  108.39   15.20
   1 -16   1   28.60   10.00
   2 -16   1   92.59   13.70
   3 -16   1   81.29   13.20
   4 -16   1   58.29   11.80
   5 -16   1   38.80   10.10
   6 -16   1    3.10    8.90
   7 -16   1   80.99   12.40
   8 -16   1   18.40    9.30
   9 -16   1   26.30   10.30
  10 -16   1    9.10    9.40
  10 -16   1  -15.90   10.30
  11 -16   1  122.19   18.10
  11 -16   1  102.89   14.60
  12 -16   1   11.50   13.30
  12 -16   1   18.50   10.70
  13 -16   1   17.60   11.20
  13 -16   1    8.50   13.50
  11  15  -1   -5.40   23.30
 -11 -15   1   21.50   15.80
  10  15  -1   14.50   19.60
 -10 -15   1   17.90   14.60
   9  15  -1  312.67   39.90
  -9 -15   1  269.07   32.80
   8  15  -1    1.90   13.60
  -8 -15   1  -15.60   12.10
   7  15  -1   23.00   13.60
  -7 -15   1   -2.00   11.80
   6  15  -1   56.49   14.20
  -6 -15   1   92.29   15.10
   5  15  -1  102.79   18.00
  -5 -15   1  111.09   16.50
   4  15  -1   83.59   15.10
  -4 -15   1   83.39   13.70
   3  15  -1  348.67   33.50
  -3 -15   1  354.66   31.10
   2  15  -1   39.60   11.90
  -2 -15   1   43.00    6.10
  -2 -15   1   48.10   11.50
   1  15  -1  270.67   29.30
  -1 -15   1  264.27   25.50
  -1 -15   1  264.97   21.50
   0 -15   1    9.70    8.20
   1 -15   1   13.30    8.70
   2 -15   1  215.78   22.50
   3 -15   1  282.77   25.90
   4 -15   1   24.50    8.50
   5 -15   1   11.80    8.20
   6 -15   1   28.60    9.30
   7 -15   1    5.70    7.70
   8 -15   1    8.70    8.40
   9 -15   1    4.60    8.60
  10 -15   1   41.60   10.20
  10 -15   1   26.20   11.20
  11 -15   1  274.17   28.40
  11 -15   1  233.48   24.20
  12 -15   1   -3.70    8.60
  12 -15   1   13.10   11.90
  13 -15   1   23.70   13.00
  13 -15   1    8.90   10.00
  12  14  -1   43.40   28.20
  11  14  -1   73.59   26.60
  10  14  -1  149.39   28.10
   9  14  -1   26.40   17.00
   8  14  -1   -8.70   13.80
  -8 -14   1    9.30   11.80
   7  14  -1   32.10   13.50
  -7 -14   1   36.20   12.50
   6  14  -1   15.80   11.80
  -6 -14   1   -0.10    9.70
   5  14  -1    1.30   10.50
  -5 -14   1    3.60    9.60
   4  14  -1   52.39   12.80
  -4 -14   1   56.19   12.30
   3  14  -1  194.98   25.60
  -3 -14   1  242.68   23.20
   2  14  -1   63.29   13.10
  -2 -14   1   76.99    8.60
  -2 -14   1  105.89   13.50
   1  14  -1    4.50    9.90
  -1 -14   1   11.80    6.10
  -1 -14   1   -6.00    6.70
   0 -14   1  206.48   20.20
   1 -14   1   57.29   10.60
   2 -14   1 1879.91  130.79
   3 -14   1  105.39   14.40
   4 -14   1    2.70    6.80
   5 -14   1   17.80    7.50
   6 -14   1  263.17   23.70
   7 -14   1   12.20    7.20
   8 -14   1   20.70    7.80
   9 -14   1   15.40    8.40
  10 -14   1  106.99   15.80
  10 -14   1  123.69   16.20
  11 -14   1   39.20   11.70
  11 -14   1   46.20    9.70
  12 -14   1    6.30   11.00
  12 -14   1    5.70    8.20
  13 -14   1   68.29   11.80
  13 -14   1   83.99   15.00
  14 -14   1   -0.80   10.10
  14 -14   1   11.60   12.30
  12  13  -1  -50.29   24.70
  11  13  -1    0.50   21.70
  10  13  -1   21.90   18.50
   9  13  -1   68.79   18.90
   8  13  -1   33.00   13.70
   7  13  -1   64.29   14.10
   6  13  -1  210.68   24.40
  -6 -13   1  212.48   23.60
   5  13  -1  -12.70    7.50
  -5 -13   1   -6.60    8.70
   4  13  -1   44.70   11.30
  -4 -13   1   61.59   11.20
   3  13  -1  202.68   22.30
  -3 -13   1  187.88   20.30
   2  13  -1  559.54   46.20
  -2 -13   1  579.14   44.30
  -2 -13   1  604.44   40.70
   1  13  -1   -4.60    7.90
  -1 -13   1   -0.90    5.00
  -1 -13   1    4.10    7.00
   0 -13   1   33.00    7.20
   0 -13   1   31.50    8.10
   1 -13   1  363.96   29.20
   2 -13   1  166.18   17.70
   3 -13   1  243.48   22.20
   4 -13   1  161.48   16.40
   5 -13   1   88.89   11.40
   6 -13   1  351.96   28.60
   7 -13   1    1.50    6.50
   8 -13   1   14.40    7.40
   9 -13   1   21.70    7.60
  10 -13   1   20.70    8.00
  10 -13   1   15.50    9.70
  11 -13   1    0.90    7.10
  11 -13   1    4.90    8.80
  12 -13   1   19.20    8.20
  12 -13   1    8.20   10.40
  13 -13   1   43.50    9.90
  13 -13   1   54.29   12.80
  14 -13   1   12.50    9.50
  14 -13   1   -1.60   11.30
  13  12  -1  -22.10   27.70
  12  12  -1  -32.10   23.60
  11  12  -1   11.50   18.80
  11  12  -1  -37.50   13.70
  10  12  -1  -18.20   12.90
  10  12  -1   13.10   16.70
   9  12  -1    3.20   14.60
   9  12  -1   11.30   12.00
   8  12  -1   12.00   11.60
   8  12  -1    8.70   11.90
   7  12  -1   88.89   15.20
   7  12  -1   95.59   15.10
   6  12  -1   -7.10    9.00
   5  12  -1    9.70    9.40
   4  12  -1  294.67   27.90
  -4 -12   1  294.77   25.70
   3  12  -1   -8.20    6.20
  -3 -12   1   14.40    7.30
   2  12  -1  502.45   37.40
  -2 -12   1  475.75   31.50
  -2 -12   1  369.16   34.50
   1  12  -1  217.38   21.50
  -1 -12   1  185.38   15.50
   0  12  -1  506.55   41.40
   0 -12   1  515.75   37.70
   0 -12   1  562.44   39.70
   1 -12   1   53.39    8.80
   2 -12   1  183.88   17.40
   3 -12   1   15.20    6.80
   4 -12   1  144.59   15.30
   5 -12   1   13.90    6.20
   6 -12   1    5.90    6.10
   7 -12   1  195.68   18.10
   8 -12   1   -1.50    6.40
   9 -12   1    1.90    6.30
   9 -12   1    4.30    8.30
  10 -12   1   16.80    8.90
  10 -12   1   16.20    6.90
  11 -12   1   -1.60    8.80
  11 -12   1    5.20    6.70
  12 -12   1    8.70    9.10
  12 -12   1    9.30    7.10
  13 -12   1   91.49   13.70
  13 -12   1   73.99   11.20
  14 -12   1   76.69   11.90
  14 -12   1   62.49   13.20
  15 -12   1  -10.30   11.10
  15 -12   1   21.30    9.90
  13  11  -1   42.90   17.30
  13  11  -1   35.70   29.70
  12  11  -1  -14.00   23.00
  12  11  -1  -19.00   14.10
  11  11  -1   31.30   14.60
  11  11  -1   81.99   21.90
  10  11  -1    8.10   15.50
  10  11  -1  -12.30   11.80
   9  11  -1   -2.50   10.80
   9  11  -1   29.00   13.30
   8  11  -1   90.19   15.00
   8  11  -1   96.29   17.40
   7  11  -1  274.47   26.10
   7  11  -1  277.47   29.20
   6  11  -1   67.69   12.50
   6  11  -1   84.89   12.70
   5  11  -1   22.30    9.80
   4  11  -1  486.95   39.10
   3  11  -1  216.58   22.90
  -3 -11   1  269.87   21.70
   2  11  -1   17.70    7.50
  -2 -11   1    9.20    6.40
  -2 -11   1    5.70    3.30
   1  11  -1   83.39   11.70
  -1 -11   1   59.29    7.60
  -1 -11   1   59.29    9.20
   0  11  -1  683.43   51.79
   0 -11   1  707.63   50.69
   0 -11   1  709.73   49.00
   2 -11   1  726.03   52.29
   3 -11   1    8.20    5.80
   4 -11   1   65.89    9.40
   5 -11   1   29.30    7.00
   6 -11   1    6.70    5.80
   7 -11   1    9.10    5.70
   8 -11   1  359.36   27.90
   9 -11   1    5.60    6.90
   9 -11   1   11.20    6.20
  10 -11   1   18.90    8.40
  10 -11   1   10.10    6.20
  11 -11   1   91.59   12.20
  11 -11   1   79.29   11.90
  12 -11   1    8.10    8.90
  12 -11   1    6.40    6.50
  13 -11   1  148.49   17.40
  13 -11   1  161.98   20.20
  14 -11   1  -11.00    9.30
  14 -11   1    3.70    8.20
  15 -11   1   16.10   10.80
  15 -11   1    3.20    8.60
  14  10  -1  -21.40   32.90
  14  10  -1   26.50   16.70
  13  10  -1   -1.00   15.30
  13  10  -1   -9.80   28.70
  12  10  -1  164.98   31.20
  12  10  -1  129.19   20.00
  11  10  -1  -20.20   11.70
  11  10  -1   18.40   18.40
  11  10  -1    1.10   11.20
  10  10  -1   80.99   16.00
  10  10  -1  136.89   22.00
  10  10  -1  110.29   14.90
   9  10  -1  142.69   21.40
   9  10  -1  196.48   16.20
   9  10  -1  188.68   24.50
   8  10  -1   39.10    5.60
   8  10  -1   30.20   12.00
   8  10  -1   40.50   10.40
   7  10  -1    7.00    8.60
   7  10  -1   19.70    9.10
   6  10  -1   87.79   14.10
   6  10  -1  123.69   15.90
   5  10  -1  475.15   39.20
   5  10  -1  511.95   38.20
   4  10  -1    1.60    6.80
   3  10  -1  155.08   16.80
  -3 -10   1  146.29   15.30
   2  10  -1  130.29   14.70
  -2 -10   1  129.39   10.20
  -2 -10   1  131.99   13.40
   1  10  -1   89.99   11.70
  -1 -10   1   73.79    7.90
  -1 -10   1   87.89   11.00
   0  10  -1    1.10    5.40
   0 -10   1   13.20    5.70
   0 -10   1    8.20    3.60
   1 -10   1  780.92   57.09
   1 -10   1  870.71   58.59
   2 -10   1  246.78   20.50
   3 -10   1    6.30    5.10
   4 -10   1  180.18   15.90
   5 -10   1   -2.50    4.40
   6 -10   1    9.70    5.40
   7 -10   1   21.00    6.10
   8 -10   1  322.57   25.00
   9 -10   1  149.49   14.00
   9 -10   1  131.89   16.40
  10 -10   1   32.50    7.00
  10 -10   1   34.40    8.50
  11 -10   1   11.10    6.00
  11 -10   1   15.20    8.10
  12 -10   1  261.67   22.90
  12 -10   1  306.07   25.60
  13 -10   1   57.29   11.20
  13 -10   1   64.99    9.80
  14 -10   1    6.70    7.80
  14 -10   1    2.50    9.30
  15 -10   1   12.00   10.30
  15 -10   1   -2.20    7.80
  14   9  -1  -30.00   29.00
  14   9  -1   26.90   15.70
  13   9  -1   17.70   15.40
  13   9  -1    2.10   27.80
  12   9  -1   42.50   23.90
  12   9  -1   50.09   14.70
  11   9  -1   69.59   14.20
  11   9  -1   71.59   22.10
  10   9  -1   17.80   10.40
  10   9  -1   37.90   15.80
   9   9  -1   19.60    7.30
   9   9  -1   19.70   12.60
   9   9  -1    9.30    9.20
   8   9  -1   23.40    5.80
   8   9  -1   17.30    9.30
   8   9  -1   18.20   10.50
   7   9  -1   69.79   13.10
   7   9  -1   89.89   12.40
   7   9  -1   79.49    8.40
   6   9  -1   44.10    9.40
   6   9  -1   65.99    9.80
   6   9  -1   54.99    5.90
   5   9  -1  536.95   42.30
   5   9  -1  554.94   41.20
   4   9  -1  250.17   23.90
   4   9  -1  283.47   22.70
   3   9  -1  127.19   15.10
   2   9  -1   24.40    6.90
  -2  -9   1   34.30    4.20
  -2  -9   1   27.60    6.40
   1   9  -1 1039.20   75.89
  -1  -9   1 1063.19   74.79
  -1  -9   1 1109.29   73.39
   0   9  -1  125.89   13.80
   0  -9   1  119.59   12.40
   0  -9   1  128.29   10.40
   1  -9   1  168.58   14.70
   1  -9   1  173.58   13.70
   2  -9   1  270.17   21.40
   3  -9   1  857.81   60.19
   4  -9   1  793.02   55.89
   5  -9   1  137.49   12.60
   6  -9   1  143.69   13.20
   7  -9   1   25.40    5.70
   8  -9   1   53.89    8.30
   8  -9   1   56.79    7.70
   9  -9   1  699.73   45.90
   9  -9   1  553.04   44.10
  10  -9   1   15.00    5.20
  10  -9   1   10.40    6.80
  11  -9   1  482.05   37.00
  11  -9   1  542.05   39.00
  12  -9   1  311.67   26.00
  12  -9   1  290.27   23.70
  13  -9   1    2.10    7.30
  13  -9   1    0.90    6.50
  14  -9   1   10.20    7.10
  14  -9   1    2.90    8.20
  15  -9   1   16.00    9.70
  15  -9   1   17.80    7.80
  16  -9   1   13.90   11.20
  14   8  -1  -53.69   26.20
  14   8  -1  -11.70   13.80
  13   8  -1   42.50   14.80
  13   8  -1  -21.50   23.20
  12   8  -1   -3.30   12.30
  12   8  -1  -19.60   19.00
  11   8  -1    1.30   16.80
  11   8  -1  -11.10   10.20
  10   8  -1   25.00   11.10
  10   8  -1   63.59   16.10
   9   8  -1    6.90    9.70
   9   8  -1   22.40   12.30
   8   8  -1   74.09   11.50
   8   8  -1   84.19   14.70
   7   8  -1   38.80    8.90
   7   8  -1   41.80    9.50
   7   8  -1   41.50    6.20
   6   8  -1   57.99    6.80
   6   8  -1   73.19   10.00
   6   8  -1   57.39   10.00
   5   8  -1  528.05   39.30
   5   8  -1  520.25   36.40
   5   8  -1  541.15   40.60
   4   8  -1  552.44   38.30
   4   8  -1  584.34   41.10
   4   8  -1  548.95   41.80
   3   8  -1  453.65   35.80
   3   8  -1  483.45   34.70
   2   8  -1   49.70    8.00
  -2  -8   1   56.39    7.80
  -2  -8   1   58.89    5.20
   1   8  -1   18.90    5.70
  -1  -8   1   31.40    3.90
  -1  -8   1   17.30    5.20
   0   8  -1 3830.92  270.27
   0  -8   1 4052.39  269.57
   0  -8   1 4020.40  268.57
   1  -8   1  641.14   45.50
   2  -8   1  221.78   17.80
   3  -8   1  980.20   68.19
   4  -8   1   12.30    4.30
   5  -8   1 1239.08   85.49
   6  -8   1  110.29   10.90
   7  -8   1   90.49    9.80
   8  -8   1  141.59   14.60
   8  -8   1  156.18   13.30
   9  -8   1   21.40    6.40
   9  -8   1   15.50    5.10
  10  -8   1  287.97   21.80
  10  -8   1  227.28   19.70
  11  -8   1  256.87   21.60
  11  -8   1  232.28   19.70
  12  -8   1   12.50    6.10
  12  -8   1   10.30    7.00
  13  -8   1   19.00    6.50
  13  -8   1   14.80    8.00
  14  -8   1    8.30    8.70
  14  -8   1   -8.20    6.30
  15  -8   1   14.30    9.50
  15  -8   1    9.60    7.50
  16  -8   1    1.60   10.30
  16  -8   1   -5.50    7.80
  15   7  -1  -19.40   28.10
  14   7  -1  -13.90   25.70
  14   7  -1    8.20   14.30
  13   7  -1   24.70   13.30
  13   7  -1  -50.39   20.40
  12   7  -1  -16.00   19.50
  12   7  -1   -5.40   10.70
  11   7  -1   62.39   19.10
  11   7  -1   34.30   12.70
  10   7  -1   11.10   14.70
  10   7  -1    4.90    9.20
   9   7  -1   18.10    8.30
   9   7  -1   34.60   12.00
   8   7  -1   11.30   10.10
   8   7  -1   12.40    7.60
   7   7  -1   18.90    7.10
   7   7  -1   22.20    7.80
   6   7  -1 1202.48   86.29
   6   7  -1 1226.08   85.09
   5   7  -1   33.40    6.80
   5   7  -1   19.30    6.40
   5   7  -1   36.30    4.30
   4   7  -1 1076.09   77.39
   4   7  -1 1085.39   74.69
   4   7  -1 1133.69   76.59
   3   7  -1   20.60    2.60
   3   7  -1   18.90    5.00
   3   7  -1   22.30    6.00
   2   7  -1  336.37   25.40
  -2  -7   1  315.37   22.40
   1   7  -1  190.08   16.60
  -1  -7   1  182.38   13.80
  -1  -7   1  198.58   15.50
   0   7  -1  263.57   21.50
   0  -7   1  289.97   19.60
   0  -7   1  261.77   20.60
   1  -7   1  289.87   21.60
   2  -7   1 1444.66   99.19
   3  -7   1  132.79   11.70
   4  -7   1  808.42   56.29
   5  -7   1   78.39    8.50
   6  -7   1  106.59   10.20
   7  -7   1  348.87   26.50
   7  -7   1  380.96   27.50
   8  -7   1  113.49   10.60
   8  -7   1  112.89   12.20
   9  -7   1   71.09   10.40
   9  -7   1   77.09    8.90
  10  -7   1    4.50    4.50
  10  -7   1    3.50    5.20
  11  -7   1   27.60    6.00
  11  -7   1   27.20    6.60
  12  -7   1   66.49   10.20
  12  -7   1  100.49   11.10
  13  -7   1   22.50    7.40
  13  -7   1   35.00    7.00
  14  -7   1   38.30    7.60
  14  -7   1   49.00   10.00
  15  -7   1   12.80    8.70
  15  -7   1    9.70    7.30
  16  -7   1   10.60   10.00
  16  -7   1    7.70    8.30
  15   6  -1  -24.10   24.20
  14   6  -1   44.40   27.90
  14   6  -1   99.19   16.40
  13   6  -1   45.80   12.80
  13   6  -1    5.30   22.70
  12   6  -1  -27.40   17.50
  12   6  -1   -4.70   10.80
  11   6  -1  -12.90    9.10
  11   6  -1  -32.10   15.50
  10   6  -1   42.10   14.50
  10   6  -1   24.40   10.00
   9   6  -1   12.10    8.00
   9   6  -1   13.30   10.60
   8   6  -1   17.20    7.00
   8   6  -1    7.80    8.10
   7   6  -1   -8.30    4.90
   7   6  -1    3.70    6.80
   6   6  -1   90.59   13.30
   6   6  -1   93.79   11.40
   5   6  -1  158.58   14.10
   5   6  -1  140.19   15.20
   4   6  -1 1614.64  105.89
   4   6  -1 1586.14  107.29
   4   6  -1 1471.35  107.79
   3   6  -1  258.77   19.90
   3   6  -1  259.07   19.10
   3   6  -1  253.77   17.30
  -3  -6   1  214.38   18.40
   2   6  -1    9.50    3.80
   2   6  -1    9.60    4.20
   2   6  -1    8.10    1.80
  -2  -6   1    4.50    3.30
   1   6  -1  138.79   12.40
  -1  -6   1  131.59   11.40
  -1  -6   1  133.99   10.00
  -1  -6   1  113.29   11.80
  -1  -6   1  147.89   11.50
   0   6  -1  694.13   50.79
   0  -6   1  739.43   49.50
   0  -6   1  707.63   50.79
   0  -6   1  696.73   50.19
   0  -6   1  767.72   50.39
  -1   6  -1  680.43   51.09
   1  -6   1  781.82   52.19
   1  -6   1  748.13   51.19
  -2   6  -1  402.96   30.60
   2  -6   1  464.95   32.00
   2  -6   1  418.86   30.40
  -3   6  -1    1.00    2.50
   3  -6   1    6.50    3.20
   4  -6   1   64.89    7.20
   5  -6   1  481.75   34.10
   6  -6   1  665.43   46.40
   7  -6   1    1.60    3.70
   7  -6   1    4.30    3.20
   8  -6   1  243.78   18.90
   8  -6   1  258.27   19.90
   9  -6   1   14.20    4.90
   9  -6   1   18.80    4.40
  10  -6   1  329.67   26.50
  10  -6   1  354.56   25.50
  11  -6   1  209.58   18.90
  11  -6   1  219.78   17.60
  12  -6   1   71.59   10.00
  12  -6   1   80.49   10.10
  13  -6   1   -4.70    6.40
  13  -6   1    3.40    5.30
  14  -6   1   32.50    7.40
  14  -6   1   39.00    8.80
  15  -6   1    6.50    7.10
  15  -6   1    3.80    8.10
  16  -6   1    8.60    9.80
  16  -6   1    9.70    8.20
  15   5  -1    9.00   24.90
  14   5  -1  -33.20   20.30
  14   5  -1  -19.00   10.90
  13   5  -1  122.19   17.00
  13   5  -1   78.39   24.30
  12   5  -1    6.30   17.20
  12   5  -1   43.30   12.20
  11   5  -1   46.70   19.00
  11   5  -1   78.09   12.50
  10   5  -1  147.69   18.00
  10   5  -1  133.89   21.20
   9   5  -1  289.67   25.70
   9   5  -1  342.67   32.30
   8   5  -1  325.17   27.70
   8   5  -1  273.07   24.30
   7   5  -1    8.40    5.40
   7   5  -1   -0.80    7.20
   6   5  -1  252.67   20.80
   6   5  -1  269.07   22.80
   5   5  -1  664.33   45.70
   5   5  -1  637.84   46.60
  -5  -5   1  629.44   44.80
   4   5  -1   36.30    5.30
   4   5  -1   27.30    5.40
  -4  -5   1   29.80    4.30
   3   5  -1  196.08   17.50
   3   5  -1  210.98   15.40
   3   5  -1  227.48   16.80
  -3  -5   1  229.78   16.30
   2   5  -1 2544.95  176.68
   2   5  -1 2469.75  177.18
   2   5  -1 2555.14  175.68
  -2  -5   1 2739.93  177.08
  -2  -5   1 2688.53  176.48
   1   5  -1 1457.95  100.89
  -1  -5   1 1496.15  100.19
  -1  -5   1 1458.75   99.49
  -1  -5   1 1438.96  100.59
  -1  -5   1 1481.65  100.29
   0   5  -1  589.24   45.40
   0  -5   1  659.53   45.60
   0  -5   1  658.23   44.40
   0  -5   1  658.13   45.10
   0  -5   1  674.83   45.20
  -1   5  -1  140.99   11.20
   1  -5   1  155.08   12.40
   1  -5   1  129.69   11.10
  -2   5  -1   15.10    3.20
   2  -5   1   16.80    3.10
  -3   5  -1  553.94   38.50
   3  -5   1  536.75   38.10
  -4   5  -1   17.80    4.30
   4  -5   1   11.20    2.90
   5  -5   1  313.07   22.60
   6  -5   1  567.34   38.30
   6  -5   1  524.85   38.60
   7  -5   1   -0.30    2.70
   7  -5   1    0.80    3.00
   8  -5   1  274.17   20.30
   8  -5   1  276.77   21.10
   9  -5   1   -1.40    3.30
   9  -5   1    3.20    4.30
  10  -5   1    2.30    4.80
  10  -5   1   -2.30    3.80
  11  -5   1   48.10    6.40
  11  -5   1   32.60    6.70
  12  -5   1   12.30    5.00
  12  -5   1    7.40    5.80
  13  -5   1  117.99   13.00
  13  -5   1  144.19   15.70
  14  -5   1  143.99   17.20
  14  -5   1  126.89   14.60
  15  -5   1    9.70    7.10
  15  -5   1    8.30    8.60
  16  -5   1   12.00   10.40
  16  -5   1   21.20    8.50
  16   4  -1  -56.39   23.10
  15   4  -1  -20.80   21.80
  14   4  -1  118.19   16.30
  14   4  -1   62.79   23.40
  13   4  -1   14.70   10.80
  13   4  -1  -25.20   18.50
  12   4  -1   -8.50    8.60
  12   4  -1  -34.00   13.30
  11   4  -1  559.04   40.40
  11   4  -1  433.76   47.10
  10   4  -1   -3.50    7.00
  10   4  -1  -15.10   11.60
   9   4  -1    8.10    6.50
   9   4  -1   -2.50    9.20
   8   4  -1    2.80    5.40
   8   4  -1   -0.20    7.70
   7   4  -1   10.10    5.10
   7   4  -1    9.50    6.80
   6   4  -1  694.23   50.89
   6   4  -1  694.73   49.40
  -6  -4   1  700.83   48.20
   5   4  -1    4.30    4.00
   5   4  -1    5.80    3.70
  -5  -4   1    0.80    2.40
   4   4  -1   21.20    4.20
   4   4  -1   16.30    4.60
  -4  -4   1   20.00    3.10
   3   4  -1  573.64   43.70
   3   4  -1  631.04   43.30
  -3  -4   1  641.04   43.50
  -3  -4   1  635.24   43.00
   2   4  -1  850.31   57.79
   2   4  -1  809.72   58.49
   2   4  -1  826.32   59.09
  -2  -4   1  887.51   58.89
  -2  -4   1  875.61   58.39
   1   4  -1   93.19    7.20
   1   4  -1  105.39    9.10
  -1  -4   1   96.59    7.90
  -1  -4   1   96.49    7.20
  -1  -4   1  103.09    8.80
   0   4  -1    2.90    2.10
   0  -4   1    4.70    1.50
   0  -4   1    3.00    1.80
   0  -4   1    1.70    2.10
  -1   4  -1 3099.79  218.98
   1  -4   1 2980.00  218.88
   1  -4   1 3627.64  219.68
  -2   4  -1  432.16   29.60
   2  -4   1  408.66   29.40
  -3   4  -1 3669.43  235.88
   3  -4   1 3290.87  235.48
  -4   4  -1  160.38   12.60
   4  -4   1  152.08   11.90
  -5   4  -1   71.99    8.70
   5  -4   1   71.89    7.40
   5  -4   1   79.19    6.90
   6  -4   1  215.38   16.20
   6  -4   1  224.48   16.80
   7  -4   1  341.27   25.10
   7  -4   1  343.07   24.40
   8  -4   1  640.24   44.00
   8  -4   1  603.74   43.30
   9  -4   1   27.10    5.70
   9  -4   1   33.30    5.00
  10  -4   1  232.88   17.30
  10  -4   1  204.18   18.40
  11  -4   1   -2.00    3.80
  11  -4   1    4.80    5.20
  12  -4   1   25.30    7.20
  12  -4   1   25.20    6.00
  13  -4   1   35.50    6.70
  13  -4   1   38.90    8.50
  14  -4   1   18.80    7.10
  14  -4   1   23.40    8.10
  15  -4   1   13.40    9.30
  15  -4   1   13.40    7.60
  16  -4   1   75.59   11.70
  16  -4   1  105.09   14.90
  16   3  -1  -29.80   19.80
  15   3  -1  126.29   26.60
  14   3  -1   44.40   12.70
  14   3  -1   28.70   19.00
  13   3  -1  149.79   25.10
  13   3  -1  168.18   20.20
  12   3  -1  369.06   40.60
  12   3  -1  360.16   30.90
  11   3  -1    7.40   13.00
  11   3  -1   14.10    8.10
  10   3  -1  -10.80   11.20
  10   3  -1   -8.40    6.30
   9   3  -1  130.59   17.90
   9   3  -1  132.29   14.80
   8   3  -1  459.65   35.10
   8   3  -1  492.15   38.80
   7   3  -1  144.49   14.20
   7   3  -1  139.49   17.60
  -7  -3   1  170.48   12.20
   6   3  -1  302.37   23.30
   6   3  -1  252.57   20.60
  -6  -3   1  267.07   19.30
   5   3  -1  635.34   45.60
   5   3  -1  651.33   46.70
  -5  -3   1  666.23   44.80
   4   3  -1  958.80   69.69
   4   3  -1 1033.20   69.09
  -4  -3   1 1020.10   68.59
   3   3  -1  528.15   35.20
   3   3  -1  453.45   35.60
  -3  -3   1  505.95   35.20
  -3  -3   1  527.95   34.90
   2   3  -1   27.80    3.70
   2   3  -1   21.20    3.60
  -2  -3   1   28.60    3.90
  -2  -3   1   26.20    3.40
   1   3  -1  198.58   14.40
   1   3  -1  180.18   14.70
   1   3  -1  187.68   13.90
  -1  -3   1  206.28   14.30
  -1  -3   1  211.18   14.80
  -1  -3   1  205.38   13.90
   0   3  -1  102.09    8.90
   0   3  -1  113.79    8.50
   0   3  -1  105.99    8.00
   0  -3   1  112.19    8.50
   0  -3   1  112.09    8.10
   0  -3   1  115.39    9.00
  -1   3  -1    4.90    1.80
   1  -3   1    7.40    2.50
   1  -3   1    5.60    1.80
  -2   3  -1 2234.08  141.19
   2  -3   1 1927.91  140.99
  -3   3  -1    1.70    1.80
   3  -3   1    3.90    1.70
  -4   3  -1 1724.23  106.59
   4  -3   1 1554.14  105.89
   4  -3   1 1402.86  105.99
  -5   3  -1  131.59   11.10
   5  -3   1  129.09   10.50
   5  -3   1  130.09   10.00
  -6   3  -1  149.88   14.40
   6  -3   1  179.48   13.00
   6  -3   1  182.08   13.60
   7  -3   1 1627.84  110.79
   7  -3   1 1609.04  110.29
   8  -3   1 1024.20   68.99
   8  -3   1  979.60   69.59
   9  -3   1  174.58   15.70
   9  -3   1  185.08   14.50
  10  -3   1  264.27   20.00
  10  -3   1  262.97   21.40
  11  -3   1  137.99   14.10
  11  -3   1  109.69   11.90
  12  -3   1    0.60    6.40
  12  -3   1   16.70    5.60
  13  -3   1   12.00    6.10
  13  -3   1    5.80    6.90
  14  -3   1  340.67   29.30
  14  -3   1  332.77   26.80
  15  -3   1    8.80    7.60
  15  -3   1    3.90   10.00
  16  -3   1   27.50    9.30
  16  -3   1   20.10   11.80
  16   2  -1   -0.80   20.10
  15   2  -1   12.30   18.80
  14   2  -1   66.89   20.50
  14   2  -1   92.59   13.90
  13   2  -1  129.09   15.00
  13   2  -1   99.99   19.70
  12   2  -1   -3.30    8.10
  12   2  -1   -6.20   13.90
  11   2  -1   -3.50    7.20
  11   2  -1  -19.90   11.50
  10   2  -1  -10.30    6.20
   9   2  -1  420.76   34.40
   9   2  -1  363.06   29.80
   8   2  -1  348.17   26.40
   8   2  -1  328.17   30.00
   7   2  -1  234.48   20.60
   7   2  -1  237.18   23.80
  -7  -2   1  297.77   19.10
   6   2  -1  136.19   12.90
   6   2  -1  140.89   15.00
  -6  -2   1  179.28   11.80
   5   2  -1  198.28   15.30
   5   2  -1  190.08   16.90
  -5  -2   1  203.78   14.20
   4   2  -1  455.75   32.80
   4   2  -1  477.25   31.90
  -4  -2   1  461.65   31.30
  -4  -2   1  423.36   31.70
   3   2  -1  187.98   14.40
   3   2  -1  185.78   13.70
  -3  -2   1  179.08   13.60
  -3  -2   1  196.08   13.40
   2   2  -1 3820.12  281.17
   2   2  -1 4113.99  280.87
  -2  -2   1 4438.96  280.87
  -2  -2   1 4256.27  281.07
   1   2  -1 1762.22  123.69
   1   2  -1 1784.52  123.99
   1   2  -1 1829.22  123.49
  -1  -2   1 1843.82  123.69
  -1  -2   1 1914.71  123.99
   0   2  -1   50.59    4.30
   0   2  -1   51.29    4.10
   0   2  -1   54.89    4.70
   0  -2   1   53.69    4.70
   0  -2   1   56.09    4.20
   0  -2   1   50.99    4.30
  -1   2  -1   32.60    3.20
   1  -2   1   31.50    3.10
  -2   2  -1   40.60    3.90
   2  -2   1   40.00    3.80
  -3   2  -1  562.54   36.00
   3  -2   1  533.55   35.70
   3  -2   1  462.25   35.60
  -4   2  -1  556.54   38.80
   4  -2   1  547.95   38.40
   4  -2   1  562.64   38.30
  -5   2  -1  144.89   12.50
  -5   2  -1  126.99   11.60
   5  -2   1  149.79   11.30
   5  -2   1  145.79   10.90
  -6   2  -1 1487.65  116.99
   6  -2   1 1805.02  117.09
   6  -2   1 1846.22  116.69
   7  -2   1  249.58   18.30
   7  -2   1  241.88   19.00
   8  -2   1   31.70    4.60
   8  -2   1   21.40    4.90
   9  -2   1   83.19    8.80
   9  -2   1   83.59   10.70
  10  -2   1   27.60    6.30
  10  -2   1   26.20    5.20
  11  -2   1  214.38   18.40
  11  -2   1  241.78   20.70
  12  -2   1   56.09    8.20
  12  -2   1   63.59    9.80
  13  -2   1  337.37   29.20
  13  -2   1  351.76   27.60
  14  -2   1   53.89    9.00
  14  -2   1   53.49   11.50
  15  -2   1   41.70   11.60
  15  -2   1   34.70    9.10
  16  -2   1  -14.20   11.50
  16  -2   1   -0.30    8.70
  16   1  -1   -6.50   17.70
  15   1  -1  -26.30   15.10
  14   1  -1   -6.30    8.80
  13   1  -1   38.00   10.00
  13   1  -1   22.70   14.30
  12   1  -1    8.90   12.80
  12   1  -1   20.80    8.20
  11   1  -1   96.49   15.80
  11   1  -1   78.19   11.00
  10   1  -1  320.17   29.50
  10   1  -1  299.07   25.10
   9   1  -1  833.22   55.89
   9   1  -1  657.33   52.29
   8   1  -1  928.91   69.59
  -8  -1   1  985.30   65.99
   7   1  -1   59.39    7.50
   7   1  -1   67.69   10.00
   6   1  -1  156.68   16.60
   6   1  -1  158.08   14.20
  -6  -1   1  203.88   13.30
   5   1  -1  106.69   12.50
   5   1  -1  124.69   10.60
  -5  -1   1  144.09    9.70
   4   1  -1  422.16   32.70
   4   1  -1  451.65   31.70
  -4  -1   1  490.45   31.30
  -4  -1   1  451.25   31.90
   3   1  -1 1325.67   92.59
   3   1  -1 1361.96   91.89
  -3  -1   1 1355.06   92.09
  -3  -1   1 1370.76   91.69
   2   1  -1  717.03   51.49
   2   1  -1  761.82   51.09
  -2  -1   1  760.02   51.29
  -2  -1   1  764.32   50.99
   1   1  -1 1007.00   69.49
   1   1  -1  956.50   69.59
  -1  -1   1 1053.59   69.59
  -1  -1   1 1084.79   69.49
  -2   1  -1  212.28   14.10
   2  -1   1  171.98   13.80
   2  -1   1  213.48   13.90
  -3   1  -1 1836.72  114.99
  -3   1  -1 1548.65  114.69
   3  -1   1 1692.63  114.59
   3  -1   1 1683.83  114.59
  -4   1  -1  337.47   27.50
  -4   1  -1  364.46   28.00
   4  -1   1  428.26   27.50
   4  -1   1  436.06   27.70
  -5   1  -1 2293.87  153.28
   5  -1   1 2270.07  152.98
   5  -1   1 2199.58  153.38
  -6   1  -1   -3.30    3.00
   6  -1   1   -0.90    2.60
   6  -1   1   -0.10    3.20
  -7   1  -1    9.00    3.90
   7  -1   1   12.40    4.40
   7  -1   1    7.30    3.20
   8  -1   1   10.60    3.90
   8  -1   1    9.20    4.80
   9  -1   1   16.60    4.80
   9  -1   1   15.50    6.00
  10  -1   1  593.04   44.00
  10  -1   1  643.84   45.30
  11  -1   1  383.96   30.00
  11  -1   1  409.86   31.70
  12  -1   1    4.10    7.70
  12  -1   1    9.90    6.40
  13  -1   1   55.89    9.70
  13  -1   1   55.29   11.60
  14  -1   1   29.10    8.20
  14  -1   1   14.90   10.40
  15  -1   1    8.30   11.00
  15  -1   1   30.90    9.20
  16  -1   1    1.90    9.10
  16  -1   1  -13.80   12.20
  16   0  -1  -27.70   14.90
  15   0  -1  -27.60   12.80
  14   0  -1   15.20    8.80
  14   0  -1  -15.20   11.20
  13   0  -1   51.89   14.10
  13   0  -1   45.60    9.60
  12   0  -1    5.90    9.80
  12   0  -1    4.40    7.00
  11   0  -1   58.69    9.30
  11   0  -1   66.39   12.50
  10   0  -1  254.37   23.70
  10   0  -1  212.68   19.60
   9   0  -1   27.50    6.10
   9   0  -1    7.50    7.50
   8   0  -1  139.79   14.90
   8   0  -1  109.59   12.40
  -8   0   1  140.39   11.40
   7   0  -1 1312.07   86.09
   7   0  -1 1042.70   84.19
  -7   0   1 1326.37   83.79
   6   0  -1  450.15   34.90
  -6   0   1  484.25   32.80
   5   0  -1  119.59   13.00
  -5   0   1  156.98   10.90
   4   0  -1 1526.65   97.29
  -4   0   1 1303.07   96.59
   3   0  -1    6.60    2.50
   3   0  -1   12.00    1.80
  -3   0   1    9.50    1.50
  -3   0   1    8.90    2.00
   2   0  -1  391.66   24.70
  -2   0   1  372.76   24.60
  -2   0   1  313.67   25.00
   1   0  -1  306.77   21.50
  -2   0  -1  852.81   55.89
  -2   0  -1  723.83   55.79
   2   0   1  779.82   55.79
   2   0   1  920.41   55.89
  -3   0  -1 1540.75   98.99
   3   0   1 1506.65   99.19
   3   0   1 1322.07   98.89
  -4   0  -1 1904.31  118.19
  -4   0  -1 1588.34  118.39
   4   0   1 1625.74  118.09
   4   0   1 1834.72  118.59
  -5   0  -1   28.30    4.50
   5   0   1   34.00    4.50
   5   0   1   45.60    6.50
  -6   0  -1 1322.17   88.09
   6   0   1 1177.18   88.09
   6   0   1 1364.16   89.09
  -7   0  -1   39.60    5.20
   7   0   1   34.80    5.40
   7   0   1   39.40    6.70
   8   0   1  817.82   54.79
   8   0   1  709.83   53.29
   9   0   1  139.89   14.90
   9   0   1  106.39   12.30
  10   0   1   13.30    6.00
  10   0   1    9.50    7.20
  11   0   1  362.96   28.30
  11   0   1  350.76   30.50
  12   0   1  122.69   14.90
  12   0   1   99.79   14.60
  13   0   1   -1.20   10.10
  13   0   1    9.90    8.50
  14   0   1    8.60    8.00
  14   0   1   -2.00   11.10
  15   0   1   -4.20   12.10
  15   0   1    1.10    8.80
  16   0   1   11.20   13.90
  16   0   1   22.70   10.50
  16  -1  -1   37.90   15.80
  15  -1  -1  -23.20   10.80
  14  -1  -1   -3.70   10.50
  14  -1  -1   -1.60    7.80
  13  -1  -1   60.09    9.80
  13  -1  -1   49.90   12.10
  12  -1  -1   88.39   13.50
  12  -1  -1  105.19   13.40
  11  -1  -1  179.08   17.30
  11  -1  -1  192.58   20.40
  10  -1  -1  153.28   17.00
  10  -1  -1  146.89   14.30
   9  -1  -1  422.06   29.00
   9  -1  -1  351.66   30.50
   8  -1  -1   28.00    5.30
   8  -1  -1   32.10    6.90
  -8   1   1   28.10    5.30
   7  -1  -1  165.88   13.70
   7  -1  -1  186.98   16.10
  -7   1   1  170.58   13.60
   6  -1  -1    2.50    2.70
   6  -1  -1    5.50    4.40
  -6   1   1    6.80    2.80
   5  -1  -1   37.10    5.50
   5  -1  -1   29.00    4.20
  -5   1   1   27.30    3.70
   4  -1  -1 1688.43  100.89
   4  -1  -1 1555.74   99.69
  -4   1   1 1252.77   99.59
  -4   1   1 1385.56  100.69
   3  -1  -1 1294.17   86.59
   3  -1  -1 1278.47   85.79
  -3   1   1 1222.68   85.79
   2  -1  -1  591.44   38.30
   2  -1  -1  567.74   37.60
  -2   1   1  470.45   38.30
  -2   1   1  585.84   37.70
   1  -1  -1   33.80    3.00
   1  -1  -1   32.90    2.50
  -2  -1  -1   37.80    3.30
  -2  -1  -1   43.60    3.40
   2   1   1   42.20    3.70
   2   1   1   36.00    3.50
  -3  -1  -1   17.90    2.50
  -3  -1  -1   17.90    2.40
   3   1   1   11.90    2.30
   3   1   1   16.00    2.60
  -4  -1  -1  217.68   15.60
  -4  -1  -1  227.48   15.40
   4   1   1  193.68   16.10
  -5  -1  -1   11.20    2.70
  -5  -1  -1    5.90    2.20
   5   1   1    1.30    2.90
   5   1   1    2.00    3.40
  -6  -1  -1 1314.87   81.19
   6   1   1 1090.19   81.59
   6   1   1 1143.39   82.49
  -7  -1  -1   36.90    4.90
   7   1   1   38.90    6.20
   7   1   1   21.30    6.30
   8   1   1   51.39    7.30
   8   1   1   39.50    8.60
   9   1   1   -0.70    5.40
   9   1   1   -2.10    7.50
  10   1   1  421.36   33.90
  10   1   1  393.26   31.40
  11   1   1  176.18   18.30
  11   1   1  160.68   21.60
  12   1   1   -0.40   10.30
  12   1   1   14.20    8.00
  13   1   1   28.20    9.70
  13   1   1   31.60   13.10
  14   1   1   -3.70    8.30
  14   1   1  -21.40   11.70
  15   1   1   79.99   12.90
  15   1   1   38.50   16.20
  16   1   1   57.39   12.40
  16   1   1   29.60   17.00
  16  -2  -1   22.30   14.30
  15  -2  -1  -11.50    9.80
  15  -2  -1   10.10    9.30
  14  -2  -1    0.40    7.40
  14  -2  -1   -2.30    9.90
  13  -2  -1  156.48   20.40
  13  -2  -1  156.98   16.30
  12  -2  -1   21.80    6.80
  12  -2  -1   19.00    8.40
  11  -2  -1    2.30    7.10
  11  -2  -1    6.30    5.10
  10  -2  -1    8.50    4.60
  10  -2  -1    6.70    6.60
   9  -2  -1   53.69    7.70
   9  -2  -1   55.29    8.40
   8  -2  -1 1386.46   87.79
   8  -2  -1 1266.47   86.29
  -8   2   1 1136.99   86.69
   7  -2  -1   14.30    4.70
   7  -2  -1   12.90    3.00
  -7   2   1    4.30    3.80
   6  -2  -1   -2.00    2.10
   6  -2  -1    0.30    3.40
  -6   2   1   -2.80    2.70
   5  -2  -1  504.95   34.70
   5  -2  -1  493.05   33.80
  -5   2   1  467.55   34.10
   4  -2  -1   68.19    6.90
   4  -2  -1   71.29    5.60
  -4   2   1   69.49    7.70
  -4   2   1   69.69    6.20
   3  -2  -1 1882.31  130.19
   3  -2  -1 1814.72  129.69
  -3   2   1 1995.00  129.99
  -3   2   1 1984.20  130.69
   2  -2  -1 1787.82  130.39
   2  -2  -1 1941.51  130.19
  -2   2   1 2046.40  130.29
   1  -2  -1  996.80   68.99
  -1   2   1 1039.80   69.09
   0  -2  -1    3.30    0.90
  -1  -2  -1  538.45   36.20
  -1  -2  -1  520.65   36.10
  -1  -2  -1  514.45   35.70
   1   2   1  538.85   36.20
  -2  -2  -1   43.20    4.00
  -2  -2  -1   49.20    3.90
   2   2   1   43.90    4.20
   2   2   1   41.40    4.30
  -3  -2  -1    6.40    1.50
  -3  -2  -1    4.20    1.40
   3   2   1    2.50    1.70
   3   2   1    6.60    1.90
  -4  -2  -1 1289.47   84.89
  -4  -2  -1 1242.98   84.99
   4   2   1 1252.57   85.59
   4   2   1 1207.08   85.49
  -5  -2  -1   11.50    2.30
  -5  -2  -1   13.90    2.70
   5   2   1   10.80    3.50
   5   2   1   16.80    4.20
  -6  -2  -1   34.20    3.90
   6   2   1   20.00    5.00
   6   2   1   22.00    5.80
   7   2   1  415.96   31.50
   7   2   1  430.96   32.80
   8   2   1   95.39   13.20
   8   2   1  135.59   13.20
   9   2   1  374.46   29.20
   9   2   1  366.96   31.80
  10   2   1    7.80   10.10
  10   2   1   14.70    7.30
  11   2   1   86.49   15.10
  11   2   1   77.99   11.80
  12   2   1   -5.00    8.30
  13   2   1   14.40    9.50
  13   2   1  -26.50   11.90
  14   2   1   40.30   10.40
  14   2   1    0.10   15.00
  15   2   1  -21.20   10.00
  15   2   1  -10.00   15.40
  16   2   1  -17.90   17.30
  16   2   1   -3.20   11.00
  16  -3  -1   28.70   13.00
  15  -3  -1    2.90   10.60
  15  -3  -1   17.30    8.40
  14  -3  -1  240.88   24.20
  14  -3  -1  210.18   20.70
  13  -3  -1   -3.40    7.30
  13  -3  -1   -2.90    5.60
  12  -3  -1   97.09   14.70
  12  -3  -1  108.29   12.30
  11  -3  -1   57.59    7.20
  11  -3  -1   57.29    8.90
  10  -3  -1   75.99    8.80
  10  -3  -1   67.99    9.60
   9  -3  -1    9.40    4.70
   9  -3  -1    5.10    3.40
   8  -3  -1  236.98   17.50
   8  -3  -1  237.38   19.30
   7  -3  -1  501.25   35.50
   7  -3  -1  508.05   34.20
  -7   3   1  457.65   35.00
   6  -3  -1 1508.15  104.29
   6  -3  -1 1573.54  105.19
  -6   3   1 1523.75  104.89
   5  -3  -1 1896.61  128.59
   5  -3  -1 1833.82  127.89
  -5   3   1 1933.81  128.49
   4  -3  -1 3115.29  217.38
   4  -3  -1 3066.89  217.88
  -4   3   1 3466.95  217.78
   3  -3  -1  657.83   49.99
   3  -3  -1  730.23   49.80
  -3   3   1  799.32   50.09
   2  -3  -1 3414.66  240.68
  -2   3   1 3709.23  240.78
   1  -3  -1   11.90    2.10
   0  -3  -1   41.20    4.40
   0  -3  -1   42.10    3.90
   0   3   1   35.30    3.70
  -1  -3  -1  825.62   55.49
  -1  -3  -1  814.42   55.29
   1   3   1  796.22   55.49
   1   3   1  799.72   55.29
  -2  -3  -1  151.28   10.90
  -2  -3  -1  148.19   10.70
   2   3   1  134.69   10.90
   2   3   1  143.99    9.90
   2   3   1  139.29   10.80
  -3  -3  -1  808.02   53.19
  -3  -3  -1  771.62   53.29
   3   3   1  720.53   53.49
   3   3   1  803.82   53.49
  -4  -3  -1  699.23   47.70
  -4  -3  -1  691.63   47.80
   4   3   1  673.03   48.40
   4   3   1  713.43   48.40
  -5  -3  -1 1170.08   77.49
   5   3   1 1132.39   78.79
   5   3   1 1104.39   78.49
  -6  -3  -1 1203.88   79.69
   6   3   1 1066.49   80.89
   6   3   1 1231.28   81.69
   7   3   1   80.29   11.80
   7   3   1   75.49   10.20
   8   3   1  539.75   41.70
   8   3   1  595.04   43.70
   9   3   1   45.30   11.90
   9   3   1   77.09   10.50
  10   3   1   81.69   15.40
  10   3   1  122.29   15.20
  11   3   1   74.49   16.50
  11   3   1  103.19   13.20
  12   3   1   68.79   12.40
  12   3   1   28.20   15.00
  13   3   1   12.40   10.00
  13   3   1   -2.10   15.00
  14   3   1  -18.70   15.00
  14   3   1    1.20    9.60
  15   3   1   -9.40   11.30
  16   3   1  -40.90   18.30
  16   3   1   -1.70   11.20
  16  -4  -1  -10.80   10.50
  15  -4  -1   42.50    8.70
  15  -4  -1   31.70   10.60
  14  -4  -1   19.90    7.70
  14  -4  -1   28.30    8.90
  13  -4  -1  116.89   13.10
  13  -4  -1  105.69   15.90
  12  -4  -1   38.70    8.50
  12  -4  -1   34.00    6.20
  11  -4  -1  156.78   15.80
  11  -4  -1  148.39   13.20
  10  -4  -1   27.10    6.40
  10  -4  -1   31.30    4.90
   9  -4  -1  123.19   10.30
   9  -4  -1  113.79   12.20
   8  -4  -1    0.50    4.00
   8  -4  -1   -2.20    2.60
   7  -4  -1   11.50    4.10
   7  -4  -1   10.90    2.80
  -7   4   1    1.10    4.60
   6  -4  -1 1238.78   83.59
   6  -4  -1 1229.28   84.39
  -6   4   1 1214.88   84.39
   5  -4  -1  820.42   56.69
   5  -4  -1  807.32   57.29
  -5   4   1  857.21   57.29
   4  -4  -1 1153.88   78.99
   4  -4  -1 1094.89   79.39
  -4   4   1 1231.48   79.49
   3  -4  -1 1527.35  106.09
  -3   4   1 1596.94  106.39
   2  -4  -1 1400.66   97.69
  -2   4   1 1474.35   97.89
   1  -4  -1  875.31   59.89
   0  -4  -1 2203.58  149.09
   0  -4  -1 2363.56  149.59
   0   4   1 2029.70  148.99
  -1  -4  -1 3578.94  233.58
  -1  -4  -1 3557.24  233.78
   1   4   1 3299.27  233.78
   1   4   1 3365.76  233.58
  -2  -4  -1 9999.00  623.84
  -2  -4  -1 9016.40  623.34
   2   4   1 9013.00  623.84
   2   4   1 8911.81  623.54
  -3  -4  -1  241.88   17.90
  -3  -4  -1  265.87   18.40
   3   4   1  235.08   18.60
   3   4   1  252.27   18.40
  -4  -4  -1  163.68   12.40
  -4  -4  -1  156.78   12.70
   4   4   1  153.98   13.30
   4   4   1  179.68   13.40
  -5  -4  -1  666.63   45.90
   5   4   1  650.33   47.20
   5   4   1  676.63   47.00
   6   4   1  406.56   30.20
   6   4   1  384.46   29.50
   7   4   1   86.69   11.10
   7   4   1   87.69   12.30
   8   4   1  154.68   16.50
   8   4   1  187.08   19.20
   9   4   1    2.10    6.80
   9   4   1    8.30    8.70
  10   4   1   10.20    8.20
  10   4   1  -19.60    9.70
  11   4   1    6.30    9.00
  11   4   1   -4.20   13.10
  12   4   1  -19.70   13.90
  12   4   1   -5.70    9.60
  13   4   1   -5.10   14.70
  13   4   1   24.30   10.60
  14   4   1   53.19   12.80
  14   4   1   22.60   18.80
  15   4   1   -5.10   12.00
  15   4   1  -19.20   17.50
  16   4   1  -29.50   20.40
  16   4   1   -9.70   12.00
  16  -5  -1    6.00   10.70
  15  -5  -1    3.50    6.60
  15  -5  -1    0.70    9.00
  14  -5  -1   74.79   11.90
  14  -5  -1   92.69   12.60
  13  -5  -1   32.50    6.70
  13  -5  -1   26.60    8.10
  12  -5  -1    4.80    4.50
  12  -5  -1   12.00    6.40
  11  -5  -1  133.99   14.60
  11  -5  -1  142.19   12.20
  10  -5  -1   65.49    7.70
  10  -5  -1   53.39    8.20
   9  -5  -1   55.29    7.90
   9  -5  -1   82.29    7.90
   8  -5  -1  147.59   13.80
   8  -5  -1  153.38   12.10
   7  -5  -1 1188.18   81.09
   7  -5  -1 1159.58   80.09
   6  -5  -1   30.70    4.90
   6  -5  -1   28.10    3.80
  -6   5   1   28.80    5.50
   5  -5  -1 1811.62  121.29
   5  -5  -1 1700.53  121.69
  -5   5   1 1839.62  121.89
   4  -5  -1  825.62   58.49
  -4   5   1  879.81   58.99
   3  -5  -1  873.71   61.99
  -3   5   1  934.41   62.29
   2  -5  -1  464.95   32.70
  -2   5   1  470.95   32.90
   1  -5  -1  948.11   65.59
   1  -5  -1  962.40   65.59
   0  -5  -1   60.39    6.20
   0  -5  -1   69.59    7.00
   0   5   1   66.39    6.40
  -1  -5  -1 1861.51  121.59
  -1  -5  -1 1829.02  121.89
   1   5   1 1649.73  121.89
   1   5   1 1801.02  121.59
  -2  -5  -1 1603.14  104.89
  -2  -5  -1 1531.35  104.49
   2   5   1 1458.65  104.59
   2   5   1 1534.05  105.09
  -3  -5  -1    9.60    2.70
  -3  -5  -1    5.80    3.10
   3   5   1    8.00    3.20
   3   5   1    8.80    3.30
  -4  -5  -1  259.37   18.70
   4   5   1  265.47   19.50
   4   5   1  233.38   19.60
   5   5   1  292.77   24.10
   5   5   1  336.37   24.10
   6   5   1  279.27   22.20
   6   5   1  278.67   22.80
   7   5   1   -1.50    5.00
   7   5   1    4.00    5.20
   8   5   1  314.77   28.80
   8   5   1  430.56   31.70
   9   5   1   11.10    7.90
   9   5   1   17.00    9.50
  10   5   1   -9.40   10.40
  10   5   1   -4.30    7.40
  11   5   1   17.50    9.70
  11   5   1  -28.60   12.20
  12   5   1   20.80   10.60
  12   5   1    6.00   15.20
  13   5   1  -21.50    9.80
  13   5   1  -18.30   15.40
  14   5   1  -38.40   18.70
  14   5   1  -19.40   11.20
  15   5   1   44.90   25.20
  15   5   1  105.89   16.70
  16   5   1  -26.70   22.40
  16   5   1   21.60   23.00
  16  -6  -1    4.40   10.50
  15  -6  -1    5.60    7.20
  15  -6  -1   17.50    9.70
  14  -6  -1    1.20    5.70
  14  -6  -1    1.50    7.70
  13  -6  -1    9.20    7.00
  13  -6  -1    5.50    5.60
  12  -6  -1   24.60    5.30
  12  -6  -1   18.20    6.70
  11  -6  -1    1.50    4.10
  11  -6  -1    6.50    5.90
  10  -6  -1   54.49    8.30
  10  -6  -1   63.99    8.00
   9  -6  -1    1.30    4.70
   9  -6  -1    6.60    3.50
   8  -6  -1  278.67   21.90
   8  -6  -1  279.57   20.50
   7  -6  -1  442.86   30.90
   7  -6  -1  432.36   31.90
   6  -6  -1  276.77   21.40
   6  -6  -1  286.27   20.50
   5  -6  -1   49.20    6.00
   5  -6  -1   44.20    5.90
   4  -6  -1  615.84   42.20
  -4   6   1  594.74   42.70
   3  -6  -1  743.43   50.69
  -3   6   1  717.83   50.89
   2  -6  -1  203.58   15.60
  -2   6   1  210.48   15.80
   1  -6  -1    2.30    2.60
   1  -6  -1    3.80    2.50
   1  -6  -1   -1.90    3.20
   0  -6  -1   37.50    5.60
   0  -6  -1   46.40    5.70
   0   6   1   40.60    6.10
  -1  -6  -1 1481.45   99.39
  -1  -6  -1 1483.15   98.99
   1   6   1 1425.46   99.09
   1   6   1 1397.06   99.49
  -2  -6  -1  523.65   36.10
  -2  -6  -1  510.05   36.60
   2   6   1  500.65   36.90
  -3  -6  -1    1.60    2.60
  -3  -6  -1    5.30    3.30
   3   6   1    7.70    4.00
   3   6   1    4.20    3.30
   4   6   1   -0.60    3.80
   4   6   1    1.70    3.60
   5   6   1   15.20    5.30
   5   6   1   13.10    4.70
   6   6   1  141.79   14.00
   6   6   1  137.69   14.60
   7   6   1  474.15   36.80
   7   6   1  503.65   37.90
   8   6   1  374.86   31.20
   8   6   1  405.66   33.40
   9   6   1  252.67   25.30
   9   6   1  321.67   28.70
  10   6   1   -1.80    8.30
  10   6   1  -10.00   10.30
  11   6   1   65.39   13.40
  11   6   1   62.39   17.40
  12   6   1  -29.90   14.40
  12   6   1   -7.70    9.80
  13   6   1   -1.30   11.60
  13   6   1  -44.30   16.00
  14   6   1   39.20   24.30
  14   6   1   58.89   15.30
  15   6   1   -1.80   13.70
  15   6   1  -38.20   23.20
  16   6   1    1.70   24.90
  16  -7  -1   46.50   12.30
  15  -7  -1   23.00    9.60
  15  -7  -1   24.50    7.70
  14  -7  -1   -2.10    5.70
  14  -7  -1    6.60    7.90
  13  -7  -1   35.40    6.50
  13  -7  -1   30.60    8.50
  12  -7  -1    1.10    6.40
  12  -7  -1    1.60    4.80
  11  -7  -1   72.69    9.60
  11  -7  -1   87.09   12.40
  10  -7  -1   47.10    6.10
  10  -7  -1   38.30    7.30
   9  -7  -1  128.59   13.70
   9  -7  -1  132.19   11.50
   8  -7  -1  406.66   32.20
   8  -7  -1  471.35   31.40
   7  -7  -1    1.50    4.00
   7  -7  -1    1.50    3.30
   6  -7  -1   20.10    4.10
   6  -7  -1   13.40    4.40
   5  -7  -1  291.57   21.60
   4  -7  -1  562.74   39.60
   3  -7  -1  221.68   17.00
   2  -7  -1   19.90    4.00
   1  -7  -1  999.20   69.09
   0  -7  -1  388.56   28.20
   0  -7  -1  384.76   28.90
   1   7   1   60.29    7.60
   1   7   1   60.79    8.30
   2   7   1  433.06   32.90
   2   7   1  462.65   32.50
   3   7   1  116.19   12.20
   3   7   1  108.09   10.90
   4   7   1  955.90   64.69
   4   7   1  886.71   64.99
   5   7   1   45.10    7.10
   5   7   1   35.40    7.10
   6   7   1  182.98   18.10
   6   7   1  199.28   17.80
   7   7   1    9.50    6.40
   7   7   1    4.60    6.30
   8   7   1  526.45   41.40
   8   7   1  550.04   42.90
   9   7   1   68.59   13.30
   9   7   1   52.09   10.80
  10   7   1  -21.40   10.00
  10   7   1   -4.10    9.60
  11   7   1   -5.80   13.60
  11   7   1   -6.50    8.90
  12   7   1   80.79   22.30
  12   7   1  114.09   17.10
  13   7   1   47.90   23.90
  13   7   1   72.39   16.40
  14   7   1  -20.80   23.40
  14   7   1   59.09   15.60
  15   7   1  -37.20   26.10
  15   7   1   15.00   15.10
  15  -8  -1    4.80    9.50
  15  -8  -1    5.70    7.20
  14  -8  -1   15.00    8.60
  14  -8  -1   14.80    6.50
  13  -8  -1   27.20    8.50
  13  -8  -1   23.60    6.40
  12  -8  -1   -0.20    6.50
  12  -8  -1    2.30    5.20
  11  -8  -1   14.30    5.40
  11  -8  -1   12.10    6.90
  10  -8  -1  479.65   34.90
  10  -8  -1  499.95   36.80
   9  -8  -1  693.03   49.60
   9  -8  -1  730.73   51.19
   8  -8  -1   19.00    4.80
   8  -8  -1   25.70    6.10
   7  -8  -1  448.36   32.80
   7  -8  -1  426.66   31.40
   6  -8  -1    3.00    3.70
   5  -8  -1  156.78   13.40
   4  -8  -1  548.25   39.00
   3  -8  -1  185.98   15.20
   2  -8  -1  230.08   18.00
   1  -8  -1   16.70    4.40
   0  -8  -1   -0.30    3.60
   1   8   1  135.79   12.40
   1   8   1  128.99   13.10
  -2  -8  -1  368.46   25.80
   2   8   1  382.36   28.20
   2   8   1  389.96   29.20
   3   8   1   14.10    5.50
   3   8   1   11.70    5.00
   4   8   1  857.91   59.49
   4   8   1  820.12   60.09
   5   8   1  215.98   20.20
   5   8   1  236.68   19.70
   6   8   1    9.10    6.30
   6   8   1    7.60    2.10
   6   8   1   10.20    6.00
   7   8   1  329.77   29.00
   7   8   1  332.67   27.70
   8   8   1   23.20    9.10
   8   8   1   24.20    8.60
   9   8   1    7.90    9.90
   9   8   1   -3.80    8.40
  10   8   1  136.49   19.40
  10   8   1   80.19   14.50
  11   8   1  -20.60    9.70
  11   8   1  -16.20   13.50
  12   8   1  100.09   23.50
  12   8   1  130.39   18.90
  13   8   1  -34.80   19.90
  13   8   1   15.80   14.30
  14   8   1  -34.90   23.20
  14   8   1  -11.30   13.80
  15   8   1  -29.50   29.60
  15   8   1   12.10   16.10
  15  -9  -1   20.80    7.60
  15  -9  -1   21.10    9.90
  14  -9  -1   -3.80    8.90
  14  -9  -1    4.10    6.40
  13  -9  -1   49.50    7.80
  13  -9  -1   32.00    9.10
  12  -9  -1    8.60    5.70
  12  -9  -1   12.90    7.60
  11  -9  -1   10.90    5.20
  11  -9  -1   12.60    7.40
  10  -9  -1    9.10    6.90
  10  -9  -1    5.90    5.00
   9  -9  -1  196.48   16.50
   9  -9  -1  199.68   18.60
   8  -9  -1  133.69   14.80
   8  -9  -1  129.89   12.50
   7  -9  -1  360.36   29.20
   7  -9  -1  392.56   28.10
   6  -9  -1  227.58   18.30
   5  -9  -1  141.59   12.80
   4  -9  -1    9.50    4.00
   3  -9  -1  231.98   18.60
   2  -9  -1  549.74   39.60
   1  -9  -1  157.38   13.80
   0  -9  -1  860.31   60.49
   1   9   1  428.76   32.70
  -2  -9  -1   58.99    4.70
   2   9   1   46.60    7.90
   2   9   1   53.19    7.50
   3   9   1    1.90    4.70
   3   9   1   -1.60    4.20
   4   9   1 2518.45  168.88
   4   9   1 2400.96  169.48
   5   9   1  233.78   22.90
   5   9   1  286.47   22.70
   6   9   1 1577.74  104.19
   6   9   1 1391.76  104.29
   7   9   1  355.66   30.90
   7   9   1  373.06   30.60
   8   9   1    5.10    8.70
   8   9   1    1.10    3.50
   8   9   1    9.00    8.90
   9   9   1  137.69   19.50
   9   9   1  143.09   19.80
  10   9   1   64.09   15.20
  10   9   1   28.60   11.50
  11   9   1   18.20   12.80
  11   9   1   54.49   16.30
  12   9   1   -2.50   12.50
  12   9   1   -8.20   16.10
  13   9   1   13.30   15.00
  13   9   1  -34.90   20.70
  14   9   1  -24.20   25.30
  14   9   1   30.40   16.60
  15   9   1  -33.40   30.00
  15   9   1   -8.00   16.20
  15 -10  -1   56.69    9.00
  15 -10  -1   13.20   10.80
  14 -10  -1   34.00   11.10
  14 -10  -1   33.80    8.00
  13 -10  -1  -10.40    8.40
  13 -10  -1   11.70    7.00
  12 -10  -1   44.20    9.90
  12 -10  -1   41.60    7.90
  11 -10  -1  164.88   18.20
  11 -10  -1  144.59   14.50
  10 -10  -1   37.00    8.70
   9 -10  -1  105.49   14.80
   9 -10  -1  127.69   12.70
   8 -10  -1   70.79   10.50
   8 -10  -1   85.59   10.80
   7 -10  -1    1.50    4.30
   6 -10  -1   22.00    5.70
   5 -10  -1  470.35   34.50
   4 -10  -1   23.20    5.50
   3 -10  -1  122.09   12.60
   2 -10  -1  263.87   20.90
   1 -10  -1   28.60    5.90
   0 -10  -1  717.03   51.29
  -1 -10  -1  181.58   16.20
   1  10   1  181.48   17.80
  -2 -10  -1  214.28   15.60
   2  10   1  232.18   19.00
   2  10   1  220.98   20.40
   3  10   1 3522.35  232.68
   3  10   1 3286.77  233.28
   4  10   1    2.50    5.60
   4  10   1   -1.00    6.00
   5  10   1   61.19   10.00
   5  10   1   40.90    9.20
   6  10   1   47.50   10.50
   6  10   1   75.09   11.60
   7  10   1  159.58   20.50
   7  10   1  190.08   20.20
   8  10   1   39.70   11.90
   8  10   1   38.70   10.20
   9  10   1   60.29   14.50
   9  10   1   47.80    6.30
   9  10   1   60.29    6.60
   9  10   1   36.30   11.40
  10  10   1  -20.60   10.30
  10  10   1   15.10   13.20
  11  10   1   21.00   16.20
  11  10   1   -9.60   12.10
  12  10   1   -7.50   13.80
  12  10   1   58.49   21.70
  13  10   1  -11.60   15.40
  13  10   1   -3.50   22.50
  14  10   1    0.50   29.00
  14  10   1   19.90   17.30
  15 -11  -1   -1.30   11.10
  15 -11  -1   17.10    8.50
  14 -11  -1    4.80    8.00
  14 -11  -1   -1.10   10.10
  13 -11  -1  109.39   14.80
  13 -11  -1   92.99   14.00
  12 -11  -1   28.40    7.50
  12 -11  -1   19.90    8.80
  11 -11  -1   23.90    7.00
  11 -11  -1   29.00    9.20
  10 -11  -1    2.50    6.70
  10 -11  -1   11.40    6.10
   9 -11  -1  370.26   28.90
   9 -11  -1  394.96   31.30
   8 -11  -1   56.29    7.90
   8 -11  -1   43.70    9.00
   7 -11  -1   98.79   11.80
   6 -11  -1  993.10   69.69
   5 -11  -1   11.60    5.20
   4 -11  -1  499.95   36.90
   3 -11  -1  459.65   34.40
   2 -11  -1   -1.40    4.70
   1 -11  -1    1.20    5.10
   0 -11  -1   67.29    9.20
  -1 -11  -1  121.79   13.70
  -1 -11  -1  119.79    9.80
   1  11   1  118.79   15.00
  -2 -11  -1  896.51   60.59
   2  11   1  880.61   64.49
   3  11   1  583.54   43.50
   3  11   1  584.24   44.70
   4  11   1   -1.00    6.20
   4  11   1    4.90    6.80
   5  11   1  250.97   23.00
   5  11   1  233.58   23.50
   6  11   1   41.70    9.90
   6  11   1   13.40    8.70
   7  11   1   15.60    9.50
   7  11   1   26.00    9.10
   8  11   1  309.67   30.00
   8  11   1  258.57   27.60
   9  11   1    0.80   11.90
   9  11   1    4.60   11.10
  10  11   1   21.30   14.70
  10  11   1   14.10   12.40
  11  11   1   11.90   17.20
  11  11   1   14.10   14.20
  12  11   1   62.39   17.40
  12  11   1   66.99   23.20
  13  11   1   99.39   20.40
  13  11   1  124.99   30.30
  14  11   1  116.09   22.30
  14  11   1   87.29   34.90
  14 -12  -1    2.20   10.90
  14 -12  -1   11.50    8.40
  13 -12  -1   17.80   10.80
  13 -12  -1   13.50    8.40
  12 -12  -1   -0.40    6.90
  12 -12  -1    7.10    9.50
  11 -12  -1   -1.50    8.30
  11 -12  -1    5.00    6.40
  10 -12  -1   42.50   10.00
  10 -12  -1   60.69    8.80
   9 -12  -1  120.39   13.80
   9 -12  -1   89.59   13.10
   8 -12  -1    6.60    7.00
   8 -12  -1    7.20    6.30
   7 -12  -1  258.37   21.70
   6 -12  -1   17.80    6.20
   5 -12  -1  275.47   22.80
   4 -12  -1  204.98   18.60
   3 -12  -1  128.59   14.90
   2 -12  -1   21.60    6.60
   1 -12  -1  221.48   20.20
   0 -12  -1   13.20    6.60
  -1 -12  -1  227.18   16.30
  -1 -12  -1  215.98   20.10
   1  12   1  189.48   21.40
  -2 -12  -1  171.58   18.30
  -2 -12  -1  189.98   13.50
   2  12   1  168.38   19.10
   3  12   1  374.96   26.90
   3  12   1  241.18   27.10
   4  12   1   85.49   11.60
   4  12   1   47.70    9.80
   5  12   1   34.00    8.90
   5  12   1   27.20    9.90
   6  12   1  163.88   21.60
   6  12   1  164.78   19.90
   7  12   1   13.60   10.80
   7  12   1   21.60   10.80
   8  12   1   14.10   11.10
   8  12   1   24.90   12.00
   9  12   1   38.70   14.10
   9  12   1   60.89   14.20
  10  12   1   22.70   14.80
  10  12   1   19.00   13.40
  11  12   1   45.90   15.50
  11  12   1   43.00   19.00
  12  12   1  169.08   24.50
  12  12   1  192.98   30.10
  13  12   1   -2.00   25.40
  13  12   1   20.00   18.10
  14  12   1  -10.80   30.90
  14 -13  -1   12.50   12.30
  14 -13  -1   -1.40    8.70
  13 -13  -1  152.68   18.30
  13 -13  -1  177.38   23.10
  12 -13  -1   25.80   11.60
  12 -13  -1   47.70    9.00
  11 -13  -1    6.10    9.00
  11 -13  -1    1.80    7.00
  10 -13  -1  101.29   14.00
  10 -13  -1   82.99   11.10
   9 -13  -1  131.59   18.00
   9 -13  -1  100.39   14.20
   8 -13  -1   13.50    7.00
   7 -13  -1  379.66   29.90
   6 -13  -1   17.30    7.20
   5 -13  -1   -2.80    6.10
   4 -13  -1  133.49   15.20
   3 -13  -1  145.19   16.00
   2 -13  -1  330.17   27.00
   1 -13  -1    8.20    6.40
   0 -13  -1   30.70    7.20
  -1 -13  -1   55.89    7.30
  -1 -13  -1   46.30    9.20
   1  13   1   67.79   11.60
  -2 -13  -1  888.51   58.29
  -2 -13  -1  818.42   61.49
   2  13   1  830.12   63.09
   3  13   1  401.66   33.90
   4  13   1  146.59   17.00
   4  13   1   88.79   14.30
   5  13   1   42.60   10.30
   5  13   1   32.40   10.20
   6  13   1   -1.20    9.70
   6  13   1    7.60    9.80
   7  13   1   12.50   11.10
   7  13   1   42.20   11.90
   8  13   1   36.90   13.40
   8  13   1   37.90   12.40
   9  13   1    7.70   11.90
   9  13   1   13.60   12.40
  10  13   1   12.70   14.80
  10  13   1   61.79   17.20
  11  13   1  239.78   33.40
  11  13   1  361.46   42.30
  12  13   1  -15.20   16.40
  12  13   1  -24.60   22.50
  13  13   1   -5.10   27.50
  13  13   1    0.80   18.90
  14 -14  -1    8.70   12.70
  14 -14  -1    3.30    9.90
  13 -14  -1   17.30   12.10
  13 -14  -1   27.00    9.30
  12 -14  -1   -5.30    7.60
  12 -14  -1    4.10   11.50
  11 -14  -1   83.69   11.50
  11 -14  -1   88.09   14.40
  10 -14  -1    2.90   10.10
  10 -14  -1    8.50    8.00
   9 -14  -1  178.18   21.30
   9 -14  -1  167.58   18.10
   8 -14  -1  134.49   16.10
   7 -14  -1   81.29   10.90
   6 -14  -1   18.60    7.90
   5 -14  -1   34.00    8.30
   4 -14  -1    2.40    6.90
   3 -14  -1    0.20    6.90
   2 -14  -1   56.39   10.20
   1 -14  -1    3.40    7.10
   0 -14  -1   37.20    6.80
   0 -14  -1   45.10    9.80
  -1 -14  -1  127.29   11.60
  -1 -14  -1  120.99   15.70
  -2 -14  -1  115.09   15.20
  -2 -14  -1  101.29    9.30
   2  14   1  106.79   16.10
  -3 -14  -1  106.49   14.40
   3  14   1   86.89   14.80
   4  14   1    3.70    8.40
   5  14   1  116.89   16.90
   5  14   1  103.29   15.40
   6  14   1   43.20   11.60
   6  14   1   60.29   13.90
   7  14   1   15.20   12.50
   7  14   1    8.00   11.90
   8  14   1  100.59   18.20
   8  14   1  107.69   18.50
   9  14   1   31.60   14.20
   9  14   1    9.10   13.60
  10  14   1   90.39   19.40
  10  14   1  125.09   23.40
  11  14   1    7.70   16.00
  11  14   1   23.60   19.90
  12  14   1    8.60   18.40
  12  14   1   17.40   24.90
  13 -15  -1    8.00   12.30
  13 -15  -1   10.30    9.20
  12 -15  -1    0.40    8.40
  12 -15  -1   13.30   11.70
  11 -15  -1   17.80    8.60
  11 -15  -1   18.90   10.80
  10 -15  -1   63.19   10.90
  10 -15  -1   62.69   13.00
   9 -15  -1   44.20    9.80
   9 -15  -1   10.00   10.80
   8 -15  -1   82.59   11.70
   7 -15  -1   14.30    8.20
   6 -15  -1  120.39   16.60
   5 -15  -1   10.70    8.00
   4 -15  -1  215.88   21.60
   3 -15  -1  407.66   32.90
   2 -15  -1    1.00    8.10
   1 -15  -1   -9.50    6.60
   0 -15  -1   39.50   10.30
  -1 -15  -1   50.09    7.50
  -1 -15  -1   53.29   10.30
  -2 -15  -1  955.90   68.49
  -2 -15  -1  935.01   64.09
   2  15   1  911.01   70.19
  -3 -15  -1   12.10    9.90
   3  15   1   11.40   11.40
  -4 -15  -1   94.29   14.40
   4  15   1   98.29   16.60
   5  15   1   36.10   13.20
   6  15   1   17.80   11.90
   7  15   1  192.18   24.90
   7  15   1  109.79   18.50
   8  15   1   46.20   16.00
   8  15   1   43.80   15.40
   9  15   1   62.89   18.40
   9  15   1   92.09   20.30
  10  15   1    3.40   17.90
  10  15   1   31.00   16.70
  11  15   1   34.00   22.10
  11  15   1  -15.50   17.60
  12  15   1  -19.20   24.50
  13 -16  -1    9.80   13.10
  12 -16  -1   13.60    9.80
  12 -16  -1   36.60   14.20
  11 -16  -1   14.00    9.40
  11 -16  -1   24.60   12.50
  10 -16  -1   -1.00    9.00
  10 -16  -1    4.90   11.20
   9 -16  -1   53.39   11.10
   8 -16  -1    6.10    8.30
   7 -16  -1  228.08   22.80
   6 -16  -1    8.30    8.80
   5 -16  -1    8.20    8.30
   4 -16  -1   21.70    8.60
   3 -16  -1   20.50   10.00
   2 -16  -1  852.31   62.59
   1 -16  -1    3.30    8.50
   0 -16  -1  145.49   18.30
  -1 -16  -1  917.81   67.69
  -1 -16  -1  919.61   63.99
  -2 -16  -1    2.00    4.40
  -2 -16  -1   -0.20    8.00
   2  16   1    3.30   11.00
  -3 -16  -1  -15.00    8.50
   3  16   1   10.50   12.00
  -4 -16  -1  101.09   15.20
   4  16   1   79.19   15.50
  -5 -16  -1   12.40   10.90
   5  16   1   -0.90   10.90
  -6 -16  -1    0.20   11.00
   6  16   1   -1.90   11.50
   7  16   1   67.59   16.40
   8  16   1   15.20   15.30
   9  16   1   46.30   18.60
  10  16   1   43.00   21.50
  11  16   1   18.00   21.70
  12 -17  -1   12.70   14.30
  12 -17  -1   28.50   11.50
  11 -17  -1   32.10   14.20
  11 -17  -1   22.30   10.90
  10 -17  -1   19.80   10.20
  10 -17  -1   12.70   12.10
   9 -17  -1   98.69   14.40
   8 -17  -1  420.96   35.30
   7 -17  -1   15.50   10.10
   6 -17  -1   16.80    9.70
   5 -17  -1   60.59   12.40
   4 -17  -1   21.50   10.00
   3 -17  -1   41.90   11.50
   2 -17  -1  221.48   24.30
   1 -17  -1   25.20   11.00
   0 -17  -1  195.08   23.20
  -1 -17  -1   44.10   11.40
  -2 -17  -1   30.10   11.70
  -3 -17  -1   -3.00    9.70
   3  17   1   -4.80   11.40
  -4 -17  -1   40.00   12.40
   4  17   1   49.40   14.30
  -5 -17  -1  -10.80   11.00
   5  17   1   16.10   13.90
  -6 -17  -1  295.17   30.00
   6  17   1  219.48   31.30
  -7 -17  -1   21.10   13.60
   7  17   1    8.40   13.60
  -8 -17  -1   42.60   17.40
   8  17   1   72.29   20.20
  -9 -17  -1   51.69   17.60
   9  17   1   41.10   18.90
  10  17   1   25.50   20.50
  11 -18  -1   26.30   12.10
  11 -18  -1   31.90   14.40
  10 -18  -1   10.00   12.70
  10 -18  -1    4.00   11.20
   9 -18  -1   63.89   13.10
   8 -18  -1  -11.40   10.10
   7 -18  -1  172.88   22.40
   6 -18  -1   10.30   10.50
   5 -18  -1  124.59   16.40
   4 -18  -1   38.30   11.60
   3 -18  -1    3.10    9.90
   2 -18  -1   51.69   13.00
   1 -18  -1    4.30   10.50
   0 -18  -1  134.59   17.70
  -1 -18  -1    8.00   10.20
  -2 -18  -1   75.29   15.60
  -3 -18  -1   46.60   14.00
   3  18   1   66.39   17.10
  -4 -18  -1   69.59   15.30
   4  18   1   84.89   17.60
  -5 -18  -1   10.40   12.80
   5  18   1   29.50   14.60
  -6 -18  -1   51.59   16.80
   6  18   1   62.79   19.10
  -7 -18  -1   -5.70   14.30
   7  18   1  -33.20   14.10
  -8 -18  -1  103.09   21.00
   8  18   1   87.99   22.90
  -9 -18  -1   39.70   19.00
   9  18   1   68.49   22.10
 -10 -18  -1   57.29   21.10
  10  18   1   92.19   25.50
  10 -19  -1    4.10   11.60
  10 -19  -1   -1.00   13.30
   9 -19  -1   11.50   11.70
   8 -19  -1   -1.30   11.60
   7 -19  -1   59.29   14.30
   6 -19  -1   55.69   13.50
   5 -19  -1   -2.80    9.80
   4 -19  -1   46.50   13.40
   3 -19  -1   44.70   13.60
   2 -19  -1    4.40   11.60
   1 -19  -1  158.68   22.00
   0 -19  -1  118.59   17.70
  -1 -19  -1   71.29   14.40
  -2 -19  -1    8.50   12.30
  -3 -19  -1   32.60   13.10
  -4 -19  -1    9.30   13.40
   4  19   1   12.70   15.10
  -5 -19  -1  141.89   21.30
   5  19   1   97.79   21.10
  -6 -19  -1   -6.40   14.70
   6  19   1    9.10   16.10
  -7 -19  -1  100.19   20.50
   7  19   1   98.89   22.60
  -8 -19  -1   72.39   20.80
   8  19   1   69.29   21.70
  -9 -19  -1    1.30   19.10
   9  19   1   21.60   22.30
   9 -20  -1    0.50   12.50
   8 -20  -1   -9.30   12.30
   7 -20  -1   -2.80   12.10
   6 -20  -1    8.30   12.20
   5 -20  -1   55.39   14.10
   3 -20  -1  120.09   18.90
   2 -20  -1   77.09   16.60
   1 -20  -1   82.79   17.40
   0 -20  -1   27.50   14.60
  -1 -20  -1   -2.30   12.20
  -2 -20  -1   20.30   13.90
  -3 -20  -1   -7.90   13.70
  -4 -20  -1   18.40   13.80
   4  20   1   14.70   17.80
  -5 -20  -1   -6.30   15.00
   5  20   1   11.10   16.50
  -6 -20  -1   -3.20   16.40
   6  20   1   14.60   17.30
  -7 -20  -1   -8.90   17.30
   7  20   1   43.40   20.90
  -8 -20  -1    7.30   18.70
   8  20   1    2.30   21.60
   8 -21  -1    3.70   13.80
   7 -21  -1    1.00   14.70
   6 -21  -1   -5.90   13.80
   5 -21  -1  162.88   22.20
   4 -21  -1    4.40   13.70
   3 -21  -1  208.38   29.50
   2 -21  -1   57.49   16.60
   1 -21  -1   40.30   15.10
   0 -21  -1   48.00   15.70
  -1 -21  -1    0.80   13.50
  -2 -21  -1  111.99   19.60
  -3 -21  -1  117.69   21.30
  -4 -21  -1  -20.50   16.30
  -5 -21  -1  135.49   23.40
   5  21   1  169.78   27.10
  -6 -21  -1   47.00   20.10
   6  21   1   76.19   24.00
   6 -22  -1   13.70   15.50
   5 -22  -1    3.80   15.70
   4 -22  -1  244.78   32.80
   3 -22  -1  102.49   20.40
   2 -22  -1   -3.60   14.00
   1 -22  -1  271.17   35.00
   0 -22  -1   54.29   18.30
  -1 -22  -1   37.80   17.70
  -2 -22  -1   32.50   16.20
  -3 -22  -1   -4.30   16.80
  -4 -22  -1   36.10   17.90
  -5 -22  -1   10.60   19.50
   4 -23  -1  100.19   21.70
   3 -23  -1    7.00   16.90
   2 -23  -1   86.59   20.30
   1 -23  -1   23.60   18.80
   0 -23  -1   66.49   21.00
  -1 -23  -1   15.20   18.40
  -2 -23  -1    2.60   17.40
  -2 -22   2   45.20   20.60
  -1 -22   2   15.30   18.00
   0 -22   2   46.90   17.90
   1 -22   2   15.10   16.70
   2 -22   2   28.00   16.40
   3 -22   2   -8.20   16.60
   4 -22   2   34.00   17.60
   5 -22   2   98.89   21.00
   4  21  -2  106.49   26.40
  -4 -21   2   92.29   21.40
  -3 -21   2    5.10   16.20
  -2 -21   2   33.70   17.70
  -1 -21   2   10.70   15.00
   0 -21   2   23.10   15.70
   1 -21   2    5.60   15.00
   2 -21   2   72.39   16.50
   3 -21   2   -7.80   14.20
   4 -21   2   88.39   18.00
   5 -21   2   27.20   15.80
   6 -21   2   82.49   17.80
   7 -21   2   14.60   14.80
   6  20  -2    2.60   20.30
  -6 -20   2   14.10   17.70
   5  20  -2   19.00   20.00
  -5 -20   2   42.80   17.70
   4  20  -2   -8.70   17.80
  -4 -20   2   12.30   16.20
   3  20  -2    6.00   17.20
  -3 -20   2   12.60   14.00
  -2 -20   2   -2.40   13.60
  -1 -20   2   26.40   15.10
   0 -20   2   75.69   17.30
   1 -20   2    6.00   13.60
   2 -20   2   84.49   17.60
   3 -20   2   31.20   14.40
   4 -20   2    3.10   13.30
   5 -20   2   13.80   13.70
   6 -20   2   14.50   13.70
   7 -20   2   16.20   14.00
   8 -20   2   27.40   13.90
   9 -20   2   69.59   16.70
   7  19  -2   40.20   21.50
  -7 -19   2   65.49   19.70
   6  19  -2   48.60   20.10
  -6 -19   2   54.79   18.30
   5  19  -2    7.10   17.20
  -5 -19   2    4.20   14.00
   4  19  -2    3.10   17.00
  -4 -19   2   38.70   16.10
   3  19  -2   13.80   17.10
  -3 -19   2   -0.90   13.10
  -2 -19   2  148.29   21.30
  -1 -19   2   45.40   14.80
   0 -19   2  312.77   32.90
   1 -19   2   41.90   14.10
   2 -19   2   53.49   14.90
   3 -19   2   28.30   12.80
   4 -19   2   33.90   13.40
   5 -19   2   11.80   12.60
   6 -19   2   24.50   12.90
   7 -19   2   59.59   13.90
   8 -19   2    3.80   12.10
   9 -19   2   11.40   12.70
  10 -19   2   14.30   13.10
   8  18  -2    8.60   20.20
  -8 -18   2    4.80   15.40
   7  18  -2   35.70   19.50
  -7 -18   2   18.20   16.40
   6  18  -2   49.00   19.60
  -6 -18   2   44.60   17.30
   5  18  -2   -2.70   16.40
  -5 -18   2    7.10   13.80
   4  18  -2   54.59   18.30
  -4 -18   2    6.60   13.20
   3  18  -2   -1.30   16.10
  -3 -18   2   19.40   12.50
   2  18  -2   58.49   16.90
  -2 -18   2   77.89   15.20
  -1 -18   2  158.58   23.00
   0 -18   2   30.30   12.20
   1 -18   2   62.79   13.60
   2 -18   2    7.90    9.90
   3 -18   2  101.19   16.20
   4 -18   2  157.78   19.50
   5 -18   2   84.39   15.00
   6 -18   2   -0.60   10.40
   7 -18   2  106.39   15.90
   8 -18   2   12.00   11.20
   9 -18   2   29.80   11.80
  10 -18   2   27.60   12.50
  11 -18   2  -10.90   11.00
  11 -18   2   -5.10   13.10
   9  17  -2   67.79   24.30
  -9 -17   2   41.50   17.70
   8  17  -2   44.60   19.80
  -8 -17   2   36.50   16.70
   7  17  -2   -1.80   16.70
  -7 -17   2    6.30   14.10
   6  17  -2   31.90   16.60
  -6 -17   2   50.49   15.20
   5  17  -2   64.49   17.10
  -5 -17   2   60.29   15.20
   4  17  -2   -3.90   13.90
  -4 -17   2   -3.30   10.90
   3  17  -2   36.10   15.20
  -3 -17   2   27.90   12.80
   2  17  -2  490.45   44.70
  -2 -17   2  463.25   40.50
  -1 -17   2   34.80   12.10
   0 -17   2   11.10   10.10
   1 -17   2    7.70   10.60
   2 -17   2   27.60   11.20
   3 -17   2    1.00    9.80
   4 -17   2   66.49   12.80
   5 -17   2   19.90   10.40
   6 -17   2   18.50    9.80
   7 -17   2   71.19   12.50
   8 -17   2  152.08   20.80
   9 -17   2  229.48   24.90
  10 -17   2   65.89   13.70
  11 -17   2    0.40   12.10
  11 -17   2   12.00   11.00
  12 -17   2   40.90   12.60
  12 -17   2   55.29   15.10
  10  16  -2   14.80   21.70
 -10 -16   2  -19.00   15.00
   9  16  -2   -6.30   20.10
  -9 -16   2   -8.10   14.10
   8  16  -2   14.00   17.50
  -8 -16   2   -4.90   13.60
   7  16  -2  135.09   22.60
  -7 -16   2  100.49   18.20
   6  16  -2   27.70   14.00
  -6 -16   2    6.80   11.70
   5  16  -2   -4.40   11.10
  -5 -16   2   15.40   11.50
   4  16  -2    0.30   11.90
  -4 -16   2    4.30   10.50
   3  16  -2    6.90   12.20
  -3 -16   2    2.20   10.20
   2  16  -2  132.29   20.60
  -2 -16   2  140.49   17.90
   1  16  -2  343.77   34.20
  -1 -16   2  296.37   29.40
   0 -16   2  140.89   18.70
   1 -16   2  -10.60    9.20
   2 -16   2   48.00   12.20
   3 -16   2   91.29   14.20
   4 -16   2   62.19   11.30
   5 -16   2   67.79   11.70
   6 -16   2   48.20   10.60
   7 -16   2   21.00    9.80
   8 -16   2  320.67   28.40
   9 -16   2   58.89   12.20
  10 -16   2   37.10   11.10
  11 -16   2   66.39   12.80
  11 -16   2   69.09   15.40
  12 -16   2    3.30   10.00
  12 -16   2    7.80   12.50
  13 -16   2   86.39   16.90
  11  15  -2   79.39   29.50
 -11 -15   2   51.09   17.10
  10  15  -2   41.60   23.10
 -10 -15   2   20.50   15.10
   9  15  -2    3.80   18.60
  -9 -15   2  -15.80   12.90
   8  15  -2  139.59   25.90
  -8 -15   2  215.78   27.00
   7  15  -2   95.49   18.90
  -7 -15   2   74.79   15.40
   6  15  -2  103.49   17.60
  -6 -15   2  127.09   17.80
   5  15  -2    9.30   11.10
  -5 -15   2   -5.20    9.90
   4  15  -2   68.89   15.10
  -4 -15   2   60.09   12.70
   3  15  -2   13.30   10.50
  -3 -15   2   12.10   10.30
   2  15  -2  303.57   31.50
  -2 -15   2  327.57   27.10
  -2 -15   2  267.57   21.80
   1  15  -2  183.58   23.50
  -1 -15   2  179.78   20.90
  -1 -15   2  180.68   17.00
   0 -15   2   87.69   13.30
   1 -15   2    8.30    8.30
   2 -15   2   74.79   12.10
   3 -15   2   32.60    9.50
   4 -15   2   63.29   11.20
   5 -15   2   73.49   11.40
   6 -15   2    9.50    8.70
   7 -15   2  286.77   25.80
   8 -15   2   65.99   11.10
   9 -15   2  145.59   18.50
  10 -15   2    6.90    9.10
  11 -15   2   14.70   11.90
  11 -15   2   14.90    9.20
  12 -15   2   -6.70    8.90
  12 -15   2   -2.70   10.90
  13 -15   2   37.50   12.90
  13 -15   2   37.80   10.90
  11  14  -2   -5.40   25.30
 -11 -14   2   -6.20   13.80
  10  14  -2   25.00   21.50
 -10 -14   2   -4.50   13.40
   9  14  -2   57.09   19.40
  -9 -14   2   67.39   15.40
   8  14  -2   54.49   15.90
  -8 -14   2   10.60   12.40
   7  14  -2   17.50   12.80
  -7 -14   2   58.29   13.60
   6  14  -2  -10.70   11.40
  -6 -14   2    7.20   10.40
   5  14  -2    2.60    9.20
  -5 -14   2   11.10   10.10
   4  14  -2   -2.10   10.30
  -4 -14   2   -4.70    8.20
   3  14  -2  159.88   23.10
  -3 -14   2  159.58   19.60
   2  14  -2    1.50   10.10
  -2 -14   2    5.40    4.80
  -2 -14   2    1.50    8.60
   1  14  -2  150.58   23.30
  -1 -14   2  179.78   15.90
  -1 -14   2  186.78   19.90
   0 -14   2  305.17   27.20
   1 -14   2  284.17   26.00
   2 -14   2   -1.80    7.60
   3 -14   2   34.50    9.50
   4 -14   2  245.88   22.90
   5 -14   2   26.70    8.70
   6 -14   2   16.10    8.20
   7 -14   2   18.50    8.30
   8 -14   2   72.09   11.50
   9 -14   2  109.19   15.80
  10 -14   2  -16.00    8.70
  10 -14   2    1.70    8.20
  11 -14   2   53.09   10.40
  11 -14   2   44.70   11.90
  12 -14   2    0.40    8.20
  12 -14   2   16.00   11.10
  13 -14   2   39.10   10.60
  13 -14   2   41.10   13.10
  14 -14   2   33.90   14.00
  14 -14   2   30.60   11.30
  12  13  -2  -27.50   28.90
 -12 -13   2   12.10   14.70
  11  13  -2   15.40   24.10
 -11 -13   2   71.19   15.70
  10  13  -2  192.58   30.20
 -10 -13   2  188.78   22.80
   9  13  -2  116.99   20.40
  -9 -13   2   95.49   16.70
   8  13  -2   10.70   14.30
  -8 -13   2    1.30   11.00
   7  13  -2   26.80   13.70
  -7 -13   2   37.60   11.80
   6  13  -2   44.20   12.20
  -6 -13   2   16.20   10.30
   5  13  -2  200.28   24.10
  -5 -13   2  167.58   21.10
   4  13  -2  147.39   21.30
  -4 -13   2  174.68   20.00
   3  13  -2   11.20    9.00
  -3 -13   2   18.00    8.40
   2  13  -2 1057.69   75.39
  -2 -13   2 1002.50   69.59
  -2 -13   2  986.50   72.79
   1  13  -2    9.50    9.00
  -1 -13   2    4.50    7.70
  -1 -13   2    6.00    5.60
   0  13  -2  561.54   44.90
   0 -13   2  576.84   43.30
   1 -13   2   39.10    9.30
   2 -13   2    7.30    7.70
   3 -13   2  265.17   23.00
   4 -13   2  212.28   19.50
   5 -13   2   21.50    7.10
   6 -13   2   11.30    7.40
   7 -13   2   -2.70    6.20
   8 -13   2   27.90    8.50
   9 -13   2  132.09   16.20
  10 -13   2   47.50    9.20
  10 -13   2   44.50   10.60
  11 -13   2    7.00    7.50
  11 -13   2    8.70    9.20
  12 -13   2   24.80   11.00
  12 -13   2   18.80    8.60
  13 -13   2    4.70   10.80
  13 -13   2   -1.20    8.10
  14 -13   2   12.20   11.80
  14 -13   2   -2.00    9.50
  12  12  -2   25.70   27.30
  11  12  -2  144.09   27.50
  10  12  -2   37.00   19.00
   9  12  -2  -16.80   14.40
   8  12  -2  256.77   31.50
   7  12  -2   64.39   15.40
  -7 -12   2   56.59   12.20
   6  12  -2  295.17   31.40
  -6 -12   2  337.97   28.80
   5  12  -2   32.90   10.20
  -5 -12   2   20.10    8.50
   4  12  -2    8.50    8.60
  -4 -12   2    2.00    6.80
   3  12  -2  633.14   53.29
  -3 -12   2  754.22   51.69
   2  12  -2   76.09   12.70
  -2 -12   2   91.89    9.10
  -2 -12   2  122.69   14.40
   1  12  -2  146.69   18.40
  -1 -12   2  180.48   17.40
  -1 -12   2  161.98   14.30
   0  12  -2  112.29   16.20
   0 -12   2  131.29   13.10
   0 -12   2  142.39   14.40
   1 -12   2   33.90    7.70
   2 -12   2   32.80    7.30
   3 -12   2  376.16   29.30
   4 -12   2  122.79   14.20
   5 -12   2   45.60    8.30
   6 -12   2   84.99   11.80
   7 -12   2   70.79    9.90
   8 -12   2   32.90    7.70
   9 -12   2   -3.20    6.40
  10 -12   2  152.28   19.70
  10 -12   2  184.08   17.40
  11 -12   2   23.30    7.90
  11 -12   2   21.60    9.40
  12 -12   2    7.00    7.20
  12 -12   2    2.00    8.70
  13 -12   2   31.60    9.30
  13 -12   2   25.80   10.60
  14 -12   2   13.30    9.10
  14 -12   2   27.60   11.50
  15 -12   2   -5.60   10.90
  15 -12   2    4.40   10.10
  13  11  -2  -55.79   28.60
  12  11  -2  108.69   29.60
  11  11  -2   59.89   24.10
  11  11  -2   59.19   15.80
  10  11  -2  -17.30   11.30
  10  11  -2   40.30   18.10
   9  11  -2   21.10   13.70
   9  11  -2   39.00    8.70
   9  11  -2   21.80   11.90
   8  11  -2   -5.10   10.40
   7  11  -2   22.20   11.30
   6  11  -2    4.00    8.70
   5  11  -2  505.05   43.20
  -5 -11   2  565.44   41.50
   4  11  -2  287.47   27.90
  -4 -11   2  340.67   27.00
   3  11  -2  541.65   44.00
  -3 -11   2  589.94   42.70
   2  11  -2  135.99   17.80
  -2 -11   2  169.38   13.10
  -2 -11   2  187.98   17.40
   1  11  -2  489.65   39.70
  -1 -11   2  505.05   35.60
  -1 -11   2  503.65   37.90
   0  11  -2    3.50    6.80
   0 -11   2   -1.20    5.60
   0 -11   2    6.20    4.70
   1 -11   2  469.85   35.70
   2 -11   2   16.70    6.10
   3 -11   2  188.68   17.70
   4 -11   2  201.48   18.30
   5 -11   2    0.50    4.90
   6 -11   2   29.60    7.00
   7 -11   2   78.49    9.90
   8 -11   2   90.69   12.50
   9 -11   2   36.30    7.70
   9 -11   2   19.20    8.10
  10 -11   2  294.77   25.70
  10 -11   2  268.27   23.40
  11 -11   2    1.30    7.60
  11 -11   2    3.40    6.30
  12 -11   2    2.90    8.70
  12 -11   2    0.80    6.90
  13 -11   2   50.89   11.30
  13 -11   2   41.00    9.50
  14 -11   2   -5.90    8.50
  14 -11   2   16.80    9.90
  15 -11   2    2.90    9.00
  15 -11   2    1.30   10.90
  13  10  -2  -29.90   27.50
  12  10  -2   12.90   25.20
  12  10  -2   -9.00   14.20
  11  10  -2   14.80   13.70
  11  10  -2   64.59   20.70
  10  10  -2  134.19   23.70
  10  10  -2  128.59   17.00
  10  10  -2   72.19   15.20
   9  10  -2   75.89   13.60
   9  10  -2   77.49   17.80
   9  10  -2   92.09   12.30
   8  10  -2   10.50    9.30
   8  10  -2    4.60   11.70
   8  10  -2   12.10    5.40
   7  10  -2   63.79    7.10
   7  10  -2   62.79   13.50
   7  10  -2   59.29   12.00
   6  10  -2  262.47   18.70
   6  10  -2  251.57   26.40
   5  10  -2   17.00    8.50
   5  10  -2    8.40    2.70
   4  10  -2   12.40    7.90
  -4 -10   2   16.20    7.10
   3  10  -2  168.68   18.90
  -3 -10   2  156.98   16.20
   2  10  -2    5.40    6.40
  -2 -10   2    3.70    3.20
  -2 -10   2    4.50    5.20
   1  10  -2   52.79    9.60
  -1 -10   2   51.29    6.90
  -1 -10   2   50.19    8.30
   0  10  -2    8.60    6.40
   0 -10   2    6.30    4.90
   0 -10   2    3.90    4.10
   1 -10   2  651.93   46.10
   1 -10   2  626.34   45.00
   2 -10   2  612.64   44.20
   3 -10   2  188.38   16.70
   4 -10   2  543.25   39.70
   5 -10   2   -1.70    5.10
   6 -10   2  345.77   26.70
   7 -10   2    7.00    5.30
   8 -10   2  432.86   32.20
   9 -10   2    3.30    6.70
   9 -10   2    8.50    5.80
  10 -10   2  115.49   15.10
  10 -10   2  105.79   12.70
  11 -10   2  132.49   16.10
  11 -10   2   88.59   13.00
  12 -10   2   14.50    8.20
  12 -10   2   14.30    7.10
  13 -10   2    5.70    8.60
  13 -10   2    7.90    7.60
  14 -10   2    1.60    8.80
  14 -10   2   13.50    8.30
  15 -10   2   -5.60    9.60
  15 -10   2   11.50    8.70
  14   9  -2  -35.40   32.40
  13   9  -2   10.00   14.50
  13   9  -2  -41.50   23.40
  12   9  -2    1.60   12.50
  12   9  -2  -22.60   21.60
  11   9  -2   54.49   20.60
  11   9  -2   35.20   12.30
  11   9  -2   55.09   14.30
  10   9  -2    9.10   14.30
  10   9  -2    9.00    9.60
  10   9  -2    2.30    9.70
   9   9  -2   80.19   10.50
   9   9  -2   40.50   11.60
   9   9  -2   48.00   14.90
   8   9  -2  707.93   52.89
   8   9  -2  662.23   45.60
   8   9  -2  556.44   48.60
   7   9  -2  128.09   17.30
   7   9  -2  144.19   12.60
   7   9  -2  149.49   21.20
   6   9  -2   21.20    4.30
   6   9  -2    3.40    7.90
   6   9  -2   16.80    7.40
   5   9  -2  244.18   18.10
   5   9  -2  256.37   23.50
   5   9  -2  252.17   21.90
   4   9  -2    2.60    6.60
   4   9  -2   -1.00    2.40
   3   9  -2  115.29   14.10
  -3  -9   2  122.79   13.00
   2   9  -2    4.60    5.10
  -2  -9   2    4.00    4.60
  -2  -9   2    2.10    2.70
   1   9  -2  111.29   13.50
  -1  -9   2  103.09   11.60
  -1  -9   2   98.79    9.20
   0   9  -2   -4.80    4.60
   0  -9   2   -0.50    4.10
   0  -9   2   -8.00    3.20
   1  -9   2  650.43   46.10
   1  -9   2  663.63   47.00
   2  -9   2   47.70    6.90
   3  -9   2   53.79    7.40
   4  -9   2   25.30    5.40
   5  -9   2    9.10    4.70
   6  -9   2   32.00    5.80
   7  -9   2  506.15   36.90
   8  -9   2  327.47   25.20
   9  -9   2    7.10    5.90
   9  -9   2    4.50    4.90
  10  -9   2   56.69    9.20
  10  -9   2   55.89    8.00
  11  -9   2   11.50    5.70
  11  -9   2   14.90    7.10
  12  -9   2   67.99    9.40
  12  -9   2   68.19   10.10
  13  -9   2   25.20    7.60
  13  -9   2   16.80    7.90
  14  -9   2   -1.30    8.30
  14  -9   2   10.00    7.30
  15  -9   2   33.60    9.20
  15  -9   2   40.60   11.30
  16  -9   2    8.10   10.70
  16  -9   2    2.00    8.40
  14   8  -2  -17.20   29.60
  13   8  -2   27.50   13.80
  13   8  -2  -34.00   22.60
  12   8  -2  -41.10   19.60
  12   8  -2   -6.30   11.10
  11   8  -2  -14.90   16.40
  11   8  -2  -10.40   10.20
  10   8  -2    1.60   10.30
  10   8  -2    1.10   14.00
   9   8  -2   16.50    9.30
   9   8  -2   32.60   12.70
   8   8  -2    9.20   11.20
   8   8  -2   11.10    6.20
   8   8  -2    8.60    7.30
   7   8  -2   67.99    9.00
   7   8  -2   80.59   11.10
   7   8  -2   52.19   11.80
   6   8  -2  313.07   27.60
   6   8  -2  299.87   22.70
   6   8  -2  318.67   25.80
   5   8  -2   10.60    7.20
   5   8  -2    9.40    3.30
   5   8  -2    6.20    5.60
   4   8  -2   17.40    3.30
   4   8  -2   12.30    6.40
   3   8  -2    4.60    2.40
   3   8  -2    3.20    5.60
  -3  -8   2    3.30    4.40
   2   8  -2  136.29   14.20
  -2  -8   2  114.09   12.20
  -2  -8   2  126.19    9.80
   1   8  -2  248.88   21.20
  -1  -8   2  239.08   19.60
  -1  -8   2  248.98   18.00
   0   8  -2   45.30    7.80
   0  -8   2   51.79    6.20
   0  -8   2   41.90    6.70
  -1   8  -2    6.10    4.50
   1  -8   2    3.40    3.30
   1  -8   2   -0.30    3.50
   2  -8   2  175.88   14.20
   2  -8   2  148.19   13.20
   3  -8   2  309.67   23.50
   4  -8   2  439.06   31.90
   5  -8   2   91.49   10.10
   6  -8   2  634.04   45.00
   7  -8   2  215.78   17.50
   8  -8   2    8.30    4.60
   8  -8   2    1.80    5.30
   9  -8   2   26.00    5.80
   9  -8   2   24.40    6.60
  10  -8   2    3.30    5.40
  10  -8   2    3.00    4.70
  11  -8   2  243.38   20.50
  11  -8   2  217.58   19.10
  12  -8   2   80.09   10.10
  12  -8   2  105.19   13.70
  13  -8   2   15.70    7.10
  13  -8   2    4.20    7.10
  14  -8   2    5.40    7.70
  14  -8   2    1.60    6.50
  15  -8   2   15.60    9.00
  15  -8   2    8.90    7.30
  16  -8   2   24.00    8.70
  16  -8   2   23.40   11.10
  14   7  -2  -14.30   27.50
  13   7  -2   63.29   14.30
  13   7  -2   20.60   25.30
  12   7  -2   26.80   23.80
  12   7  -2   71.69   14.40
  11   7  -2  -16.20   16.80
  11   7  -2   -0.80   10.50
  10   7  -2   47.40   16.20
  10   7  -2   16.80    9.20
   9   7  -2   27.40    8.90
   9   7  -2   23.20   13.30
   8   7  -2  461.75   37.20
   8   7  -2  370.46   32.10
   7   7  -2  781.22   56.59
   7   7  -2  718.63   53.99
   6   7  -2  116.09   16.00
   6   7  -2  107.59   10.50
   6   7  -2  116.59   13.30
   5   7  -2   30.70    6.70
   5   7  -2   44.70    6.00
   5   7  -2   42.50    8.50
   4   7  -2  134.39   13.10
   4   7  -2  139.69   10.90
   4   7  -2  134.39   14.40
   3   7  -2  459.35   31.00
   3   7  -2  427.36   33.70
   2   7  -2  607.94   45.30
   2   7  -2  603.84   42.60
  -2  -7   2  641.34   42.70
  -2  -7   2  626.74   44.10
   1   7  -2  154.78   14.20
  -1  -7   2  135.69   12.50
  -1  -7   2  142.39   11.10
   0   7  -2    2.80    4.10
   0  -7   2   -0.20    3.20
   0  -7   2   -0.30    2.60
  -1   7  -2  490.25   36.30
   1  -7   2  506.65   34.90
   1  -7   2  490.95   35.60
   2  -7   2  992.00   68.79
   3  -7   2  288.97   21.80
   4  -7   2    3.20    3.70
   5  -7   2   24.90    4.70
   6  -7   2  209.78   16.80
   7  -7   2  186.08   15.20
   8  -7   2   35.90    5.50
   8  -7   2   25.20    5.80
   9  -7   2   24.70    5.20
   9  -7   2   20.60    5.80
  10  -7   2   14.60    5.10
  10  -7   2   10.80    5.40
  11  -7   2  104.89   13.10
  11  -7   2  100.69   11.60
  12  -7   2   39.00    7.30
  12  -7   2   31.50    7.90
  13  -7   2    4.30    6.60
  13  -7   2   19.90    6.40
  14  -7   2    4.80    7.30
  14  -7   2   -4.20    6.10
  15  -7   2  128.09   15.80
  15  -7   2  131.69   18.20
  16  -7   2   10.30    8.00
  16  -7   2   -3.40    9.30
  15   6  -2  -38.90   27.70
  14   6  -2  -42.50   23.70
  13   6  -2    9.80   12.20
  13   6  -2  -29.00   23.80
  12   6  -2  -24.40   17.40
  12   6  -2   -0.70   11.30
  11   6  -2   49.80   11.60
  11   6  -2   38.40   19.10
  10   6  -2    6.30   13.40
  10   6  -2   26.50    9.30
   9   6  -2  221.48   22.40
   9   6  -2  295.17   30.30
   8   6  -2  413.66   33.20
   8   6  -2  444.26   37.90
   7   6  -2    8.90    8.50
   7   6  -2   10.50    6.10
   6   6  -2   92.39   12.50
   6   6  -2   89.59   11.20
   5   6  -2 1736.93  127.99
   5   6  -2 1961.00  127.19
   4   6  -2    3.70    3.90
   4   6  -2   -1.70    4.50
   4   6  -2    2.80    2.60
   3   6  -2   -0.30    3.40
   3   6  -2    5.80    4.40
   3   6  -2    3.30    2.40
  -3  -6   2    1.20    2.70
   2   6  -2  681.53   49.00
   2   6  -2  687.73   47.00
  -2  -6   2  659.23   48.00
  -2  -6   2  708.63   47.90
   1   6  -2  979.30   68.99
   1   6  -2 1029.30   70.89
  -1  -6   2  994.70   69.79
  -1  -6   2 1066.79   69.09
  -1  -6   2  985.80   69.89
   0   6  -2    1.10    3.60
   0  -6   2    3.20    3.10
   0  -6   2    3.60    3.40
   0  -6   2    2.30    2.30
  -1   6  -2   69.49    8.90
   1  -6   2   86.69    7.40
   1  -6   2   84.69    8.30
   1  -6   2   73.19    9.10
   2  -6   2  620.24   43.50
   3  -6   2  259.47   19.50
   4  -6   2   20.40    4.10
   5  -6   2  170.18   13.80
   6  -6   2  126.09   11.00
   7  -6   2  196.38   15.90
   7  -6   2  209.88   16.70
   8  -6   2  116.59   11.30
   8  -6   2  139.89   12.30
   9  -6   2    6.50    3.70
   9  -6   2    9.70    4.80
  10  -6   2  155.18   14.40
  10  -6   2  140.69   13.50
  11  -6   2   15.30    5.70
  11  -6   2   22.30    5.40
  12  -6   2    8.10    6.10
  12  -6   2    0.90    4.90
  13  -6   2    0.40    5.50
  13  -6   2    5.90    6.70
  14  -6   2  161.78   16.10
  14  -6   2  165.78   18.10
  15  -6   2   34.90    8.40
  15  -6   2   51.29   10.50
  16  -6   2   20.10    8.30
  16  -6   2   22.10   10.40
  15   5  -2  -55.69   24.20
  14   5  -2   44.20   26.30
  13   5  -2   30.40   12.30
  13   5  -2  -21.30   21.70
  12   5  -2   14.40   10.10
  12   5  -2  -24.40   18.00
  11   5  -2  -12.90    8.10
  10   5  -2  -12.30   13.50
  10   5  -2   -3.20    7.30
   9   5  -2   14.10   12.00
   9   5  -2    4.90    6.40
   8   5  -2   58.59   11.80
   8   5  -2   47.50    8.30
   7   5  -2  381.36   30.40
   7   5  -2  429.96   34.10
   6   5  -2 2515.95  172.58
   6   5  -2 2537.05  174.28
   5   5  -2  425.06   31.20
   5   5  -2  429.56   32.60
  -5  -5   2  423.86   30.40
   4   5  -2  298.87   22.00
   4   5  -2  265.37   22.70
  -4  -5   2  303.07   21.30
   3   5  -2  968.70   63.49
   3   5  -2  853.81   64.09
   3   5  -2  899.01   62.59
  -3  -5   2  934.71   63.09
   2   5  -2 2784.82  194.28
   2   5  -2 2841.72  192.88
  -2  -5   2 2782.62  193.48
  -2  -5   2 2988.30  193.48
   1   5  -2   51.69    7.20
   1   5  -2   38.10    4.20
  -1  -5   2   43.90    5.40
  -1  -5   2   33.50    5.30
  -1  -5   2   30.50    4.60
  -1  -5   2   45.80    4.40
   0   5  -2  603.84   44.60
   0   5  -2  616.64   43.90
   0  -5   2  633.34   43.50
   0  -5   2  669.53   44.10
   0  -5   2  633.04   44.50
  -1   5  -2  249.68   20.50
  -1   5  -2  273.17   20.30
   1  -5   2  297.67   21.00
   1  -5   2  262.67   20.10
   1  -5   2  291.17   19.80
  -2   5  -2    1.20    2.80
   2  -5   2    6.20    3.80
   2  -5   2    2.80    2.60
  -3   5  -2   13.30    3.80
   3  -5   2   14.80    3.10
   4  -5   2 1296.07   88.69
   5  -5   2  904.91   62.39
   6  -5   2 2520.55  165.78
   6  -5   2 2358.46  165.98
   7  -5   2    8.60    3.30
   7  -5   2    2.60    3.10
   8  -5   2  912.91   63.79
   8  -5   2  922.71   63.39
   9  -5   2   23.20    4.70
   9  -5   2   27.10    5.40
  10  -5   2   46.50    6.30
  10  -5   2   47.90    6.80
  11  -5   2   71.39   11.00
  11  -5   2   92.49   10.20
  12  -5   2   70.79    9.30
  12  -5   2   52.99    8.30
  13  -5   2  192.68   17.10
  13  -5   2  194.88   18.70
  14  -5   2  147.49   15.60
  14  -5   2  155.28   17.30
  15  -5   2   16.80    8.60
  15  -5   2    4.30    7.20
  16  -5   2   -4.10    9.70
  16  -5   2    8.20    7.80
  15   4  -2  -17.60   22.50
  14   4  -2   46.70   20.30
  14   4  -2    8.20   21.60
  13   4  -2  -10.10    9.70
  13   4  -2  -38.30   18.00
  12   4  -2   -7.60    9.10
  12   4  -2  -11.10   17.30
  11   4  -2  101.99   22.60
  11   4  -2  121.89   16.80
  10   4  -2   -0.10   13.70
  10   4  -2   16.70    7.80
   9   4  -2   -9.50   10.80
   9   4  -2    8.00    6.40
   8   4  -2   46.50    7.70
   8   4  -2   30.10   10.40
   7   4  -2  292.57   23.60
   7   4  -2  315.77   27.70
   6   4  -2  138.59   12.70
   6   4  -2  135.29   15.60
  -6  -4   2  135.89   11.10
   5   4  -2  650.33   48.90
   5   4  -2  684.23   47.60
  -5  -4   2  691.13   46.80
   4   4  -2   44.70    6.20
   4   4  -2   38.10    6.40
  -4  -4   2   42.20    5.30
   3   4  -2   70.89    7.10
   3   4  -2   59.99    7.70
  -3  -4   2   73.79    6.70
   2   4  -2  545.65   40.50
   2   4  -2  553.24   39.40
  -2  -4   2  597.44   39.70
  -2  -4   2  590.54   40.30
   1   4  -2  669.33   47.10
  -1  -4   2  722.13   47.50
  -1  -4   2  710.43   48.00
  -1  -4   2  706.83   47.10
  -1  -4   2  624.74   47.40
   0   4  -2 2791.72  196.18
   0   4  -2 3014.50  196.58
   0   4  -2 2884.31  196.98
   0  -4   2 3019.70  196.98
   0  -4   2 3103.59  196.28
   0  -4   2 2584.14  196.38
  -1   4  -2  120.49    9.70
  -1   4  -2  113.79   10.10
   1  -4   2  133.89   10.30
   1  -4   2  123.29    9.30
   1  -4   2  111.19    9.60
  -2   4  -2 1101.29   79.49
   2  -4   2 1284.07   80.29
   2  -4   2 1105.99   79.39
  -3   4  -2   21.90    3.70
   3  -4   2   22.70    3.40
  -4   4  -2 2978.40  199.08
   4  -4   2 2878.41  198.38
   5  -4   2 4537.35  306.97
   6  -4   2  474.45   33.90
   6  -4   2  482.85   33.60
   7  -4   2   68.89    7.80
   7  -4   2   71.49    7.40
   8  -4   2  162.08   13.50
   8  -4   2  152.28   12.80
   9  -4   2  525.85   37.80
   9  -4   2  539.35   38.30
  10  -4   2  168.88   14.30
  10  -4   2  172.68   15.20
  11  -4   2   67.29    8.50
  11  -4   2   41.60    7.30
  12  -4   2    4.30    4.80
  12  -4   2    4.40    5.70
  13  -4   2  165.48   16.60
  13  -4   2  142.89   14.70
  14  -4   2   90.79   13.50
  14  -4   2  118.09   15.60
  15  -4   2    7.00    8.90
  15  -4   2   -4.40    6.90
  16  -4   2   19.70   10.10
  16  -4   2   13.80    8.50
  17  -4   2   11.90   12.20
  15   3  -2  -24.50   19.90
  14   3  -2  -23.50   18.60
  14   3  -2  -11.80   11.20
  13   3  -2   -2.70    9.70
  13   3  -2  -14.70   17.50
  12   3  -2   -4.00   15.80
  12   3  -2   -5.20    8.30
  11   3  -2  168.88   24.90
  11   3  -2  193.18   19.40
  10   3  -2  111.59   14.70
  10   3  -2  115.79   19.90
   9   3  -2  267.57   31.50
   9   3  -2  338.47   25.50
   8   3  -2   -0.10    8.70
   8   3  -2    8.50    5.30
  -8  -3   2    1.50    2.10
   7   3  -2   -3.40    7.10
   7   3  -2    3.70    4.40
  -7  -3   2    2.60    2.60
   6   3  -2  629.04   46.80
   6   3  -2  608.44   44.40
  -6  -3   2  646.34   43.30
   5   3  -2  658.33   47.90
   5   3  -2  658.53   46.20
  -5  -3   2  667.73   45.50
   4   3  -2  882.21   64.99
   4   3  -2  940.31   64.09
  -4  -3   2  966.50   63.69
   3   3  -2  187.48   15.70
   3   3  -2  198.38   14.90
  -3  -3   2  208.48   15.30
  -3  -3   2  204.98   14.60
   2   3  -2 1040.20   72.09
   2   3  -2  968.20   72.69
   2   3  -2 1101.39   72.29
  -2  -3   2 1093.19   72.59
  -2  -3   2 1083.99   72.19
   1   3  -2 2052.99  143.19
   1   3  -2 2087.29  142.59
  -1  -3   2 2176.18  142.59
  -1  -3   2 2171.58  142.69
  -1  -3   2 1886.11  142.59
  -1  -3   2 2253.47  143.19
   0   3  -2  198.98   14.40
   0   3  -2  207.88   14.60
   0   3  -2  194.98   15.10
   0  -3   2  187.68   14.60
   0  -3   2  211.08   15.10
   0  -3   2  211.28   14.50
  -1   3  -2    8.00    2.30
  -1   3  -2    5.70    2.00
   1  -3   2    7.30    2.20
   1  -3   2   14.30    2.30
   1  -3   2    6.70    1.90
  -2   3  -2    5.00    2.10
   2  -3   2    6.20    2.00
  -3   3  -2  800.42   52.19
   3  -3   2  709.23   51.69
  -4   3  -2 5205.98  335.67
   4  -3   2 4711.13  334.97
  -5   3  -2 1055.29   71.69
   5  -3   2 1071.79   70.79
   5  -3   2  979.10   70.89
   6  -3   2  691.03   47.60
   6  -3   2  686.03   47.80
   7  -3   2   40.70    5.80
   7  -3   2   45.60    6.30
   8  -3   2   89.19    9.00
   8  -3   2   74.99    8.20
   9  -3   2  312.07   21.80
   9  -3   2  267.17   22.20
  10  -3   2   97.49    9.90
  10  -3   2   85.69   10.70
  11  -3   2    9.20    5.40
  11  -3   2    9.00    4.50
  12  -3   2    6.40    6.30
  12  -3   2   11.60    5.50
  13  -3   2    4.00    5.40
  13  -3   2    8.80    7.20
  14  -3   2   79.59   10.80
  14  -3   2  110.59   15.30
  15  -3   2   42.80    9.00
  15  -3   2   30.70   10.70
  16  -3   2   12.10    8.70
  16  -3   2    4.20   10.50
  17  -3   2   45.70   10.50
  17  -3   2   21.60   13.30
  16   2  -2   43.70   21.00
  15   2  -2  -38.20   15.10
  14   2  -2    6.60   19.60
  13   2  -2    6.90    9.30
  13   2  -2    2.70   16.20
  12   2  -2  160.48   18.10
  12   2  -2  161.18   23.60
  11   2  -2   54.69    9.70
  11   2  -2   50.39   16.70
  10   2  -2   -2.80    5.90
   9   2  -2    9.20    5.80
   9   2  -2  -18.70    9.50
   8   2  -2    4.80    4.80
   8   2  -2  -14.70    8.00
  -8  -2   2   10.20    3.20
   7   2  -2   83.69    9.50
  -7  -2   2   91.99    7.70
   6   2  -2   62.49    7.70
   6   2  -2   49.99    9.50
  -6  -2   2   76.99    6.10
   5   2  -2  275.87   23.70
   5   2  -2  299.97   21.80
  -5  -2   2  312.47   20.90
   4   2  -2  486.65   33.30
   4   2  -2  462.85   34.40
  -4  -2   2  479.25   32.80
   3   2  -2  736.33   52.19
   3   2  -2  749.53   51.39
  -3  -2   2  786.12   51.19
  -3  -2   2  726.13   51.59
   2   2  -2  151.38   10.90
   2   2  -2  132.39   11.40
  -2  -2   2  157.08   10.80
  -2  -2   2  151.08   11.20
   1   2  -2  399.56   29.70
   1   2  -2  415.86   29.30
  -1  -2   2  455.55   29.70
  -1  -2   2  439.26   29.30
  -1  -2   2  413.26   29.30
   0   2  -2  706.13   47.60
   0   2  -2  692.13   47.30
   0   2  -2  674.33   47.20
   0  -2   2  677.73   47.20
   0  -2   2  707.73   47.50
  -1   2  -2   62.39    4.80
  -1   2  -2   50.09    5.10
  -1   2  -2   47.20    4.70
   1  -2   2   60.69    5.20
   1  -2   2   50.49    4.90
   1  -2   2   58.19    4.80
  -2   2  -2 2519.45  164.38
   2  -2   2 2333.87  164.18
  -3   2  -2 1136.29   75.19
   3  -2   2 1062.59   74.79
  -4   2  -2  195.38   14.50
   4  -2   2  170.38   13.60
   4  -2   2  200.68   13.70
  -5   2  -2    0.00    3.20
   5  -2   2    3.50    2.20
   5  -2   2    2.70    2.30
  -6   2  -2   21.20    5.00
   6  -2   2   31.70    4.20
   6  -2   2   26.60    3.90
   7  -2   2  119.69   10.20
   7  -2   2  114.69   10.60
   8  -2   2   15.70    4.00
   8  -2   2   12.90    4.00
   9  -2   2    5.40    3.80
   9  -2   2   12.00    4.70
  10  -2   2   22.60    5.80
  10  -2   2   20.60    5.00
  11  -2   2   11.40    4.90
  11  -2   2   17.30    6.20
  12  -2   2   32.40    7.80
  12  -2   2   42.30    7.30
  13  -2   2  151.88   15.50
  13  -2   2  154.68   17.80
  14  -2   2  164.78   19.80
  14  -2   2  158.48   17.50
  15  -2   2   16.70    8.30
  15  -2   2    2.00    9.80
  16  -2   2   11.90   10.90
  16  -2   2   29.00    9.50
  17  -2   2   10.50   10.00
  17  -2   2   -6.70   12.70
  16   1  -2   -5.50   18.70
  15   1  -2    0.20   16.80
  14   1  -2  -29.30   14.30
  14   1  -2   -3.80    9.20
  13   1  -2  188.58   24.60
  13   1  -2  202.08   20.30
  12   1  -2    9.60    7.70
  12   1  -2   -3.70   13.00
  11   1  -2  416.76   34.20
  11   1  -2  497.05   40.90
  10   1  -2   -6.10    5.80
  10   1  -2   -8.10   10.10
   9   1  -2   15.70    9.80
   9   1  -2   20.80    6.40
  -9  -1   2   20.00    4.20
   8   1  -2   66.39   12.90
  -8  -1   2   84.19    8.00
   7   1  -2  354.66   28.50
   7   1  -2  334.07   25.40
   6   1  -2  293.27   22.90
  -6  -1   2  331.77   22.10
   5   1  -2 1665.13  134.59
   5   1  -2 2055.29  133.29
  -5  -1   2 2143.59  132.69
   4   1  -2  138.79   12.50
   4   1  -2  144.39   10.50
  -4  -1   2  145.69   10.00
  -4  -1   2  124.49   10.70
   3   1  -2   65.19    6.90
   3   1  -2   63.19    5.50
  -3  -1   2   69.49    5.10
  -3  -1   2   66.99    5.90
   2   1  -2  101.49    8.10
   2   1  -2   96.79    7.30
  -2  -1   2   97.89    7.20
  -2  -1   2  103.49    7.60
   1   1  -2    7.40    1.70
  -1  -1   2    9.70    1.70
  -1  -1   2    9.10    1.40
   0   1  -2 1359.46   92.19
   0   1  -2 1304.17   91.99
   0   1  -2 1361.96   92.29
   0  -1   2 1249.28   91.99
   0  -1   2 1420.26   92.19
   0  -1   2 1464.15   92.29
  -1   1  -2   10.70    1.60
  -1   1  -2    9.60    1.70
   1  -1   2   13.10    2.00
   1  -1   2   11.10    1.60
   1  -1   2   15.00    2.00
  -2   1  -2  306.07   20.50
   2  -1   2  280.97   20.40
   2  -1   2  285.87   20.20
  -3   1  -2    5.30    1.90
   3  -1   2   10.20    1.60
   3  -1   2    5.20    1.60
  -4   1  -2  783.62   51.99
   4  -1   2  758.22   51.49
   4  -1   2  712.13   51.59
  -5   1  -2   48.30    6.50
  -5   1  -2   38.30    5.00
   5  -1   2   42.20    5.20
   5  -1   2   36.00    5.20
  -6   1  -2    0.20    3.40
   6  -1   2    1.00    2.70
   6  -1   2   -1.80    2.80
   7  -1   2    1.80    3.10
   7  -1   2    2.80    3.40
   8  -1   2   47.10    6.70
   8  -1   2   41.40    6.50
   9  -1   2   -0.30    4.70
   9  -1   2    0.40    3.90
  10  -1   2   49.50    7.20
  10  -1   2   54.89    8.40
  11  -1   2    5.60    6.40
  11  -1   2   -3.50    4.80
  12  -1   2   35.90    7.70
  12  -1   2   33.70    8.30
  13  -1   2  199.68   19.50
  13  -1   2  232.18   22.60
  14  -1   2   52.19    9.80
  14  -1   2   49.40   11.30
  15  -1   2   21.40   11.60
  15  -1   2   15.00    8.70
  16  -1   2   66.09   11.90
  16  -1   2   72.59   15.10
  17  -1   2   47.10   13.60
  17  -1   2   17.50   14.50
  16   0  -2   -8.90   14.60
  15   0  -2   -8.00   14.80
  14   0  -2   92.69   18.30
  14   0  -2  133.09   17.00
  13   0  -2   33.30    9.10
  13   0  -2   17.80   12.80
  12   0  -2   40.70    8.60
  12   0  -2   21.30   12.20
  11   0  -2   31.30    7.60
  11   0  -2   23.00   11.60
  10   0  -2   80.99   13.10
  10   0  -2   82.69   10.00
   9   0  -2  277.27   24.60
   9   0  -2  205.78   20.30
  -9   0   2  279.47   19.30
   8   0  -2   -7.60    7.30
   8   0  -2   -6.70    4.00
  -8   0   2    1.90    3.20
   7   0  -2 1683.43  116.19
  -7   0   2 1655.43  113.39
   6   0  -2  137.59   15.60
  -6   0   2  173.18   12.20
   5   0  -2   21.10    3.30
   5   0  -2   26.40    5.80
   4   0  -2   19.10    2.50
   4   0  -2    7.70    3.80
  -4   0   2   24.70    2.80
  -4   0   2   16.10    3.40
   3   0  -2  876.01   55.79
  -3   0   2  733.33   56.39
  -3   0   2  849.52   55.69
   2   0  -2 1224.78   90.39
   2   0  -2 1370.56   89.59
  -2   0   2 1375.86   89.59
  -2   0   2 1331.57   90.29
   1   0  -2  554.84   37.90
   1   0  -2  550.34   38.40
  -1   0   2  575.74   37.90
  -1   0   2  557.04   38.20
   0   0  -2    2.90    0.60
   0   0  -2    3.70    0.70
   0   0   2    1.70    0.90
  -1   0  -2  178.98   11.70
   1   0   2  150.88   11.90
  -2   0  -2  512.95   32.30
   2   0   2  396.66   32.60
   2   0   2  477.95   32.60
   2   0   2  500.15   32.30
  -3   0  -2   66.09    5.70
  -3   0  -2   56.39    5.30
   3   0   2   61.99    5.20
   3   0   2   50.69    5.40
  -4   0  -2   42.10    4.60
   4   0   2   30.10    3.90
   4   0   2   23.50    3.60
  -5   0  -2  608.84   39.10
   5   0   2  575.64   39.20
   5   0   2  487.85   38.80
  -6   0  -2   22.00    4.10
   6   0   2   15.70    3.90
   6   0   2   15.90    4.40
   7   0   2  424.06   29.20
   7   0   2  357.46   28.20
   8   0   2  441.16   30.80
   8   0   2  373.56   29.60
   9   0   2    0.90    4.50
   9   0   2    1.10    5.70
  10   0   2   -7.90    5.90
  10   0   2   -5.10    5.00
  11   0   2   32.30    7.10
  11   0   2   38.50    9.10
  12   0   2  262.47   24.30
  12   0   2  230.78   21.60
  13   0   2   -4.60    7.10
  13   0   2   -2.30    9.40
  14   0   2   -8.00   10.00
  14   0   2    0.80    8.10
  15   0   2  135.99   19.30
  15   0   2  147.59   18.80
  16   0   2    5.30    9.60
  16   0   2    7.50   13.60
  17   0   2   -0.60   15.30
  16  -1  -2   85.69   19.20
  15  -1  -2   -5.60   13.20
  14  -1  -2   31.80    9.10
  14  -1  -2   13.30   11.90
  13  -1  -2  -13.50    9.90
  13  -1  -2    2.10    7.10
  12  -1  -2   -2.50    9.30
  12  -1  -2   -4.20    6.20
  11  -1  -2  242.48   24.10
  11  -1  -2  223.88   19.80
  10  -1  -2    1.20    5.30
  10  -1  -2   -2.70    6.70
   9  -1  -2  144.49   13.60
   9  -1  -2  146.39   16.50
  -9   1   2  143.09   12.90
   8  -1  -2  979.90   62.49
   8  -1  -2  828.32   60.09
  -8   1   2  806.82   59.69
   7  -1  -2   -1.10    3.20
   7  -1  -2    7.70    5.90
  -7   1   2    5.20    3.00
   6  -1  -2   98.39    9.00
   6  -1  -2  131.49   12.30
  -6   1   2  100.09    8.70
   5  -1  -2  113.09    8.80
  -5   1   2  105.09    8.60
   4  -1  -2  420.86   28.50
  -4   1   2  401.46   29.80
   3  -1  -2  417.76   28.10
  -3   1   2  417.76   28.10
  -3   1   2  392.86   29.30
   2  -1  -2 1060.29   73.09
   2  -1  -2 1056.29   72.09
  -2   1   2 1084.59   72.09
   1  -1  -2  339.47   21.90
  -1   1   2  286.07   21.80
  -1  -1  -2  894.21   58.19
   1   1   2  816.42   58.29
  -2  -1  -2   48.40    3.60
  -2  -1  -2   48.10    4.10
  -2  -1  -2   43.50    3.90
   2   1   2   44.90    4.00
   2   1   2   48.10    3.70
   2   1   2   40.40    4.20
  -3  -1  -2    1.70    1.20
  -3  -1  -2    1.50    1.40
   3   1   2   -1.50    1.70
   3   1   2    0.10    1.30
  -4  -1  -2  576.04   39.70
  -4  -1  -2  656.03   39.70
   4   1   2  550.24   39.90
   4   1   2  504.95   39.80
  -5  -1  -2   14.50    2.90
  -5  -1  -2   15.00    2.80
   5   1   2    1.70    3.00
   5   1   2    7.90    3.40
  -6  -1  -2  177.48   13.00
   6   1   2  152.08   13.70
   6   1   2  158.48   14.30
   7   1   2  420.26   31.20
   7   1   2  402.36   30.20
   8   1   2   -0.20    5.80
   8   1   2    1.40    4.60
   9   1   2  748.43   53.09
   9   1   2  694.33   51.39
  10   1   2   25.60    9.30
  10   1   2   24.20    7.00
  11   1   2  126.29   14.90
  11   1   2  124.99   18.20
  12   1   2   49.99   12.50
  12   1   2   80.19   11.30
  13   1   2   56.29   10.50
  13   1   2   49.70   12.90
  14   1   2   74.99   12.20
  14   1   2   68.49   15.60
  15   1   2  105.49   18.70
  15   1   2  132.99   18.60
  16   1   2   -7.80   14.60
  16   1   2   -1.90    9.90
  17   1   2  -25.50   15.90
  16  -2  -2  -22.30   13.00
  15  -2  -2   -6.30   11.60
  14  -2  -2   17.60    7.90
  14  -2  -2    1.70   10.10
  13  -2  -2  124.89   14.40
  13  -2  -2   96.59   14.60
  12  -2  -2   42.70   10.30
  12  -2  -2   35.90    7.60
  11  -2  -2    3.00    7.60
  11  -2  -2    0.60    5.30
  10  -2  -2   20.90    7.10
  10  -2  -2   37.70    6.10
   9  -2  -2    3.00    4.10
   9  -2  -2    9.60    6.40
  -9   2   2   12.30    5.10
   8  -2  -2    9.20    3.60
   8  -2  -2   14.90    6.10
  -8   2   2   11.60    3.90
   7  -2  -2   39.40    6.40
   7  -2  -2   28.80    4.10
  -7   2   2   22.90    4.30
   6  -2  -2    2.80    3.70
   6  -2  -2   -1.10    2.00
  -6   2   2    0.00    2.50
   5  -2  -2   64.09    5.60
   5  -2  -2   70.39    7.60
  -5   2   2   62.79    6.10
   4  -2  -2    7.60    1.60
   4  -2  -2    6.20    3.00
  -4   2   2    7.20    2.00
  -4   2   2    2.80    3.40
   3  -2  -2  174.28   12.80
   3  -2  -2  164.78   11.60
  -3   2   2  173.58   11.80
  -3   2   2  148.09   13.20
   2  -2  -2 1372.76   99.59
   2  -2  -2 1486.75  100.09
  -2   2   2 1474.05   99.69
  -2   2   2 1563.04  100.49
   1  -2  -2   17.90    2.40
   1  -2  -2   22.40    2.20
  -1   2   2   19.40    2.20
   0  -2  -2 1938.01  128.49
   0   2   2 1863.01  128.49
  -1  -2  -2   83.29    6.40
  -1  -2  -2   87.39    6.40
  -1  -2  -2   89.09    6.50
   1   2   2   85.99    6.40
   1   2   2   85.19    6.40
   1   2   2   87.29    6.50
  -2  -2  -2  558.04   39.00
  -2  -2  -2  602.24   39.20
  -2  -2  -2  574.64   39.00
   2   2   2  549.74   39.10
   2   2   2  562.14   39.00
   2   2   2  584.54   39.40
  -3  -2  -2 4852.71  319.87
  -3  -2  -2 4843.92  319.77
   3   2   2 4700.93  320.17
   3   2   2 4541.55  319.87
  -4  -2  -2 3809.22  239.88
  -4  -2  -2 3659.53  239.78
   4   2   2 3183.58  240.28
   4   2   2 3527.25  240.28
  -5  -2  -2  111.49    9.00
  -5  -2  -2  126.29    9.00
   5   2   2   90.89   10.00
   5   2   2  116.69   10.40
  -6  -2  -2  350.36   21.70
   6   2   2  243.58   22.60
   6   2   2  293.37   23.20
   7   2   2  138.59   14.60
   7   2   2  152.48   13.90
   8   2   2  296.77   22.10
   8   2   2  225.08   22.60
   9   2   2  205.48   22.00
   9   2   2  231.18   19.80
  10   2   2   61.79    9.80
  10   2   2   29.60   10.20
  11   2   2    9.20    7.40
  11   2   2   -1.80    9.80
  12   2   2  143.39   19.40
  12   2   2  148.89   18.60
  13   2   2  262.47   24.30
  13   2   2  234.88   29.80
  14   2   2   13.50    9.80
  14   2   2    5.80   14.30
  15   2   2   -1.70   15.60
  15   2   2   18.70   11.30
  16   2   2    6.60   11.00
  16   2   2   17.40   18.20
  16  -3  -2    1.40   12.80
  15  -3  -2    0.30   11.50
  14  -3  -2    9.70    7.20
  14  -3  -2   -7.40    9.80
  13  -3  -2  175.48   16.80
  13  -3  -2  174.08   20.50
  12  -3  -2   63.09    8.10
  12  -3  -2   47.70    9.50
  11  -3  -2  291.37   22.20
  11  -3  -2  277.57   24.50
  10  -3  -2    5.20    5.70
  10  -3  -2    4.30    4.10
   9  -3  -2   94.29   11.70
   9  -3  -2   83.49    8.70
   8  -3  -2    4.70    5.00
   8  -3  -2    2.80    2.80
  -8   3   2    2.40    4.20
   7  -3  -2  275.87   19.10
   7  -3  -2  260.37   20.70
  -7   3   2  258.87   20.00
   6  -3  -2 1456.95   98.29
   6  -3  -2 1408.46   99.39
  -6   3   2 1472.95   98.79
   5  -3  -2  188.88   13.80
   5  -3  -2  198.98   15.20
  -5   3   2  195.88   14.50
   4  -3  -2  677.03   46.50
   4  -3  -2  689.53   47.30
  -4   3   2  715.93   46.90
  -4   3   2  641.44   48.10
   3  -3  -2  895.01   61.49
   3  -3  -2  879.91   60.89
  -3   3   2  914.91   61.19
   2  -3  -2   37.90    3.60
   2  -3  -2   35.40    4.00
  -2   3   2   42.70    3.80
   1  -3  -2 1159.98   77.29
  -1   3   2 1114.39   77.19
   0  -3  -2   10.00    2.00
   0   3   2    9.10    1.90
  -1  -3  -2  470.75   31.80
  -1  -3  -2  458.35   32.10
  -1  -3  -2  491.95   32.10
   1   3   2  450.35   32.10
   1   3   2  450.85   32.20
  -2  -3  -2 4612.74  287.57
  -2  -3  -2 3947.51  287.07
  -2  -3  -2 4437.86  287.47
   2   3   2 4227.58  287.57
   2   3   2 4275.27  287.07
   2   3   2 4023.20  287.57
  -3  -3  -2  562.14   36.80
  -3  -3  -2  521.65   36.80
   3   3   2  506.55   37.00
   3   3   2  553.74   37.30
   3   3   2  522.05   36.50
  -4  -3  -2  239.48   17.80
  -4  -3  -2  266.27   18.00
   4   3   2  236.98   18.40
   4   3   2  260.37   18.80
  -5  -3  -2  800.92   53.09
  -5  -3  -2  776.82   53.09
   5   3   2  733.73   54.09
   5   3   2  776.32   53.99
   6   3   2   91.99   10.10
   6   3   2   69.79    9.50
   7   3   2    4.30    5.10
   7   3   2    4.40    4.80
   8   3   2  191.88   19.00
   8   3   2  171.28   17.30
   9   3   2   54.69    9.30
   9   3   2   33.90   10.10
  10   3   2   27.10    8.70
  10   3   2    4.00   10.10
  11   3   2   12.10    8.50
  11   3   2    8.30   10.50
  12   3   2   -0.60    8.90
  12   3   2  -32.10   11.70
  13   3   2    0.60   14.30
  13   3   2   29.50   10.30
  14   3   2  -14.30   15.50
  14   3   2    3.60   10.20
  15   3   2  231.68   25.70
  15   3   2  198.68   28.60
  16   3   2  -22.20   18.40
  16   3   2   44.40   12.30
  16  -4  -2    2.10   12.50
  15  -4  -2   18.20   11.60
  14  -4  -2    4.30    9.30
  14  -4  -2    7.90    6.70
  13  -4  -2   21.60    8.70
  13  -4  -2   15.90    6.40
  12  -4  -2   14.90    7.60
  12  -4  -2    4.30    5.00
  11  -4  -2   61.79    7.30
  11  -4  -2   58.99    9.10
  10  -4  -2  180.88   17.30
  10  -4  -2  186.48   14.70
   9  -4  -2   44.90    6.00
   9  -4  -2   37.60    6.90
   8  -4  -2  125.39   12.10
   8  -4  -2  126.59   10.30
  -8   4   2  122.89   12.30
   7  -4  -2  120.79    9.10
   7  -4  -2  101.39   10.90
  -7   4   2  108.89   10.80
   6  -4  -2   20.00    2.80
   6  -4  -2   22.30    4.40
  -6   4   2   16.70    4.10
   5  -4  -2  650.13   44.70
   5  -4  -2  640.84   45.60
  -5   4   2  667.43   45.40
   4  -4  -2  131.59   10.20
   4  -4  -2  141.29   11.10
  -4   4   2  139.99   10.80
   3  -4  -2  409.76   31.20
   3  -4  -2  446.16   30.90
  -3   4   2  483.85   31.20
   2  -4  -2  958.00   65.39
   1  -4  -2  501.95   34.80
   0  -4  -2  268.77   18.70
   0   4   2  256.57   18.70
  -1  -4  -2  238.88   16.90
  -1  -4  -2  242.78   17.10
   1   4   2  232.68   17.00
   1   4   2  224.88   17.10
  -2  -4  -2  336.27   22.00
  -2  -4  -2  317.57   21.70
  -2  -4  -2  279.87   20.90
   2   4   2  298.87   20.90
   2   4   2  305.97   21.80
   2   4   2  300.07   22.00
  -3  -4  -2    4.10    2.10
  -3  -4  -2    5.30    2.10
   3   4   2    3.20    2.50
   3   4   2    3.80    2.50
   3   4   2    4.60    1.40
  -4  -4  -2 4606.34  312.77
  -4  -4  -2 4737.23  312.97
   4   4   2 4360.96  313.27
   4   4   2 4799.82  313.57
  -5  -4  -2    7.00    2.80
  -5  -4  -2    7.30    2.40
   5   4   2    5.30    3.40
   5   4   2    4.70    4.00
   6   4   2    9.30    4.10
   6   4   2    4.90    4.20
   7   4   2  231.78   20.50
   7   4   2  259.57   21.10
   8   4   2  371.16   33.60
   8   4   2  521.85   35.70
   9   4   2  129.89   16.10
   9   4   2  123.49   18.60
  10   4   2  391.06   30.10
  10   4   2  297.07   31.40
  11   4   2  149.29   18.70
  11   4   2   83.79   17.70
  12   4   2   25.10   15.80
  12   4   2   60.19   12.50
  13   4   2    8.40   15.70
  13   4   2   37.10   11.50
  14   4   2  295.77   38.20
  14   4   2  314.77   30.30
  15   4   2   24.50   12.60
  15   4   2    9.50   19.40
  16   4   2  -22.30   20.00
  16   4   2   -3.90   12.00
  16  -5  -2    6.40   12.30
  15  -5  -2   40.70   11.50
  14  -5  -2    7.90    6.60
  14  -5  -2   12.10    8.60
  13  -5  -2   35.60    8.90
  13  -5  -2   41.80    7.10
  12  -5  -2   41.30    8.40
  12  -5  -2   35.50    6.30
  11  -5  -2   16.30    6.40
  11  -5  -2    8.00    4.00
  10  -5  -2  298.57   21.50
  10  -5  -2  281.87   23.80
   9  -5  -2   54.29    8.00
   9  -5  -2   64.79    7.20
   8  -5  -2   47.80    7.00
   8  -5  -2   49.30    6.00
   7  -5  -2    6.20    2.50
   7  -5  -2    3.90    4.00
  -7   5   2   -1.70    4.30
   6  -5  -2  611.64   42.40
   6  -5  -2  582.54   41.30
  -6   5   2  605.14   42.30
   5  -5  -2   92.89    8.00
   5  -5  -2  107.59    9.40
  -5   5   2   91.79    9.10
   4  -5  -2   72.09    7.20
   4  -5  -2   65.59    6.40
  -4   5   2   69.79    7.10
   3  -5  -2  160.58   12.20
  -3   5   2  163.78   12.60
   2  -5  -2 2036.30  136.29
   2  -5  -2 1973.30  136.19
   1  -5  -2  266.97   18.80
   1  -5  -2  250.07   18.70
   0  -5  -2  220.48   15.50
   0  -5  -2  182.78   14.40
   0   5   2  188.58   14.60
  -1  -5  -2 1540.35  101.89
  -1  -5  -2 1546.15  101.59
   1   5   2 1406.06  101.79
   1   5   2 1465.05  101.59
  -2  -5  -2   22.20    3.40
  -2  -5  -2   21.50    3.70
  -2  -5  -2   28.10    2.30
   2   5   2   28.00    4.00
   2   5   2   20.00    3.70
  -3  -5  -2  519.35   35.90
  -3  -5  -2  541.55   36.30
   3   5   2  520.45   34.90
   3   5   2  477.25   36.40
   3   5   2  502.35   36.30
  -4  -5  -2   15.50    3.10
  -4  -5  -2   16.70    3.80
   4   5   2   15.40    3.80
   4   5   2   23.00    4.60
   4   5   2   18.70    2.40
   5   5   2  108.69   10.30
   5   5   2   86.09   10.00
   6   5   2    0.00    4.10
   6   5   2    4.00    4.80
   7   5   2  262.27   21.80
   7   5   2  240.38   21.30
   8   5   2    1.80    5.80
   8   5   2    0.70    5.90
   9   5   2  131.59   17.10
  10   5   2   11.10    9.60
  10   5   2   39.20   10.30
  11   5   2   35.20   13.70
  11   5   2   43.90   11.80
  12   5   2  -28.20   12.50
  12   5   2   -2.50    9.40
  13   5   2   17.60   18.30
  13   5   2   65.09   13.70
  14   5   2  146.99   18.50
  14   5   2   82.99   23.70
  15   5   2  -16.20   21.70
  15   5   2  -12.00   12.10
  16   5   2    2.90   13.20
  16   5   2   20.70   24.00
  16  -6  -2    5.00   11.30
  15  -6  -2    2.00    9.80
  14  -6  -2   73.69   12.50
  14  -6  -2  114.09   13.30
  13  -6  -2  232.88   19.40
  13  -6  -2  238.38   22.20
  12  -6  -2   60.19    9.40
  12  -6  -2   60.59    7.40
  11  -6  -2  171.88   14.30
  11  -6  -2  171.58   17.00
  10  -6  -2   31.60    5.00
  10  -6  -2   26.00    6.90
   9  -6  -2  214.08   15.90
   9  -6  -2  197.08   17.90
   8  -6  -2  334.37   25.40
   8  -6  -2  327.57   23.70
   7  -6  -2   89.99    8.30
   7  -6  -2   96.69   10.30
   6  -6  -2  112.89    9.20
   6  -6  -2  117.09   10.40
  -6   6   2   88.89   10.50
   5  -6  -2  106.39    8.80
   5  -6  -2  102.39    9.80
  -5   6   2   94.69   10.10
   4  -6  -2    4.10    2.60
  -4   6   2    9.60    3.60
   3  -6  -2  190.58   14.80
  -3   6   2  198.78   15.10
   2  -6  -2  583.44   40.80
   2  -6  -2  585.84   40.90
   1  -6  -2 2761.72  185.78
   1  -6  -2 2710.63  185.78
   0  -6  -2  110.09    9.60
   0  -6  -2  121.19   10.90
   0   6   2  115.09    9.90
  -1  -6  -2  190.88   14.30
  -1  -6  -2  180.98   14.70
   1   6   2  172.48   14.70
   1   6   2  186.98   14.30
  -2  -6  -2  972.80   66.59
  -2  -6  -2  956.90   66.89
  -2  -6  -2 1034.20   65.39
   2   6   2  916.01   66.69
   2   6   2  939.61   67.09
  -3  -6  -2   59.49    7.10
  -3  -6  -2   76.29    8.30
   3   6   2   75.39    8.80
   3   6   2   78.49    8.30
   4   6   2    0.80    3.60
   4   6   2    2.70    1.40
   4   6   2    4.30    3.70
   5   6   2  462.75   36.10
   5   6   2  534.35   36.30
   5   6   2  485.65   33.90
   6   6   2  593.14   42.00
   6   6   2  551.64   41.90
   7   6   2   29.30    7.30
   7   6   2   25.70    7.20
   8   6   2  236.38   21.90
   8   6   2  196.18   20.40
   9   6   2  -13.40    6.70
   9   6   2  -11.00    8.00
  10   6   2  171.98   22.70
  10   6   2  111.19   16.20
  11   6   2  -13.70   11.20
  11   6   2    7.90    9.70
  12   6   2   32.70   11.50
  12   6   2    8.30   15.70
  13   6   2  102.19   16.50
  13   6   2   40.80   20.20
  14   6   2   39.70   13.90
  14   6   2  -13.60   20.10
  15   6   2  -30.70   20.80
  15   6   2    3.00   13.40
  16   6   2  -11.70   14.10
  15  -7  -2    4.10   10.10
  14  -7  -2   -0.70    5.80
  14  -7  -2    1.40    8.20
  13  -7  -2  133.99   13.60
  13  -7  -2  113.59   16.20
  12  -7  -2   56.79    9.40
  12  -7  -2   56.69    7.20
  11  -7  -2   84.09   11.90
  11  -7  -2   89.39    9.90
  10  -7  -2   11.40    4.30
  10  -7  -2   11.00    5.70
   9  -7  -2   87.49    8.80
   9  -7  -2   84.09   11.50
   8  -7  -2  543.45   37.60
   8  -7  -2  529.65   39.00
   7  -7  -2  315.97   24.10
   7  -7  -2  315.37   22.90
   6  -7  -2   41.30    6.20
   6  -7  -2   55.79    6.60
   5  -7  -2  487.65   34.50
   4  -7  -2    3.50    3.00
  -4   7   2   -1.70    3.10
   3  -7  -2  214.88   16.60
   2  -7  -2  449.16   31.90
   2  -7  -2  444.06   32.10
   1  -7  -2   38.10    5.20
   1  -7  -2   42.50    5.90
   0  -7  -2   82.69    8.40
   0  -7  -2   93.89   10.50
   0   7   2   82.19    8.30
  -1  -7  -2  273.77   20.20
   1   7   2  242.68   20.00
   1   7   2  255.27   19.50
  -2  -7  -2  202.78   17.70
   2   7   2  236.28   17.60
   2   7   2  236.98   18.30
   3   7   2    6.80    4.30
   3   7   2   -0.40    3.80
   4   7   2 1277.57   88.99
   5   7   2  436.76   33.80
   5   7   2  450.25   30.90
   5   7   2  467.65   33.70
   6   7   2   30.10    3.80
   6   7   2   17.30    6.10
   6   7   2   35.30    6.90
   7   7   2  337.27   29.00
   7   7   2  380.46   29.20
   8   7   2   -2.60    6.90
   8   7   2    9.40    8.00
   9   7   2   44.00   10.80
   9   7   2   47.20   10.80
  10   7   2  380.56   33.80
  11   7   2  -12.00   12.30
  11   7   2   16.60   10.70
  12   7   2   26.70   17.30
  12   7   2   32.70   13.70
  13   7   2  -37.30   17.40
  13   7   2   -4.40   12.70
  14   7   2   28.00   14.60
  14   7   2  -43.40   20.20
  15   7   2  -39.70   21.80
  15   7   2    8.30   14.70
  16   7   2   19.90   15.30
  16   7   2  -11.60   27.60
  15  -8  -2   11.80    9.60
  14  -8  -2   14.80    6.20
  14  -8  -2   22.10    8.60
  13  -8  -2   26.90    6.40
  13  -8  -2   38.10    8.90
  12  -8  -2    5.50    5.10
  12  -8  -2   -9.50    6.40
  11  -8  -2    2.30    4.50
  11  -8  -2    2.20    6.50
  10  -8  -2   93.39   10.10
  10  -8  -2  103.39   12.40
   9  -8  -2  406.36   31.00
   9  -8  -2  402.06   29.10
   8  -8  -2   24.60    6.00
   8  -8  -2   17.20    4.30
   7  -8  -2    3.00    4.50
   7  -8  -2    6.40    3.70
   6  -8  -2   24.40    5.60
   6  -8  -2   15.80    4.10
   5  -8  -2   42.10    5.70
   4  -8  -2  116.99   10.90
   3  -8  -2   -0.70    3.30
   2  -8  -2 1159.38   80.09
   1  -8  -2   31.40    5.50
   0   8   2  162.98   13.90
   1   8   2 4755.02  328.07
   1   8   2 4905.81  327.67
   2   8   2   87.29    9.50
   2   8   2   90.69   10.60
   3   8   2   -1.50    3.80
   3   8   2   -1.30    4.10
   4   8   2    3.50    4.50
   4   8   2    9.30    5.00
   5   8   2   82.09   11.90
   5   8   2  106.99   12.10
   6   8   2    7.80    5.50
   6   8   2   14.40    6.50
   6   8   2    9.50    2.30
   7   8   2  188.58   14.60
   7   8   2  209.38   20.40
   7   8   2  209.38   19.90
   8   8   2   37.20    9.40
   8   8   2   22.00    4.80
   8   8   2   28.70    8.80
   9   8   2  168.88   19.90
   9   8   2  113.19   12.00
  10   8   2   21.60   10.10
  10   8   2   17.50   11.40
  11   8   2  127.69   20.30
  11   8   2   92.59   17.00
  12   8   2    7.90   16.00
  12   8   2    7.10   12.30
  13   8   2  -31.10   17.80
  13   8   2    8.30   13.80
  14   8   2   -7.40   15.10
  14   8   2  -49.90   21.30
  15   8   2   37.70   16.30
  15   8   2  -39.80   25.60
  15  -9  -2   23.30   10.70
  14  -9  -2   16.30   10.00
  14  -9  -2    8.80    6.30
  13  -9  -2   46.00   10.00
  13  -9  -2   66.29    8.40
  12  -9  -2   -0.90    7.20
  12  -9  -2    2.30    5.40
  11  -9  -2   13.20    6.90
  11  -9  -2   14.60    5.70
  10  -9  -2   -2.30    4.30
  10  -9  -2    1.00    6.50
   9  -9  -2   30.60    7.40
   9  -9  -2   28.50    5.30
   8  -9  -2  214.28   17.90
   8  -9  -2  240.18   20.20
   7  -9  -2   10.80    5.10
   7  -9  -2    7.80    4.50
   6  -9  -2  178.38   14.90
   5  -9  -2  151.08   13.20
   4  -9  -2    5.00    3.90
   3  -9  -2  632.04   44.90
   2  -9  -2  293.07   22.60
   1  -9  -2  376.06   28.00
   1   9   2   91.69   10.20
   1   9   2   97.99   11.60
   2   9   2  261.67   20.70
   2   9   2  247.88   21.30
   3   9   2   90.39   11.00
   3   9   2   90.59   11.60
   4   9   2 1320.27   90.49
   4   9   2 1269.47   90.99
   5   9   2   21.30    7.30
   5   9   2   18.10    6.70
   6   9   2  258.17   23.30
   6   9   2  259.77   22.90
   7   9   2    5.00    7.40
   7   9   2    1.60    7.20
   8   9   2   58.79    7.10
   8   9   2   64.39   12.00
   8   9   2   59.09   11.70
   9   9   2   30.00   11.80
   9   9   2   23.80    9.40
   9   9   2   24.40    5.50
  10   9   2   39.10   12.30
  10   9   2   22.10    6.60
  11   9   2   20.30   15.20
  11   9   2  -14.40   11.90
  12   9   2   20.30   14.70
  12   9   2   34.90   18.70
  13   9   2    8.00   20.00
  13   9   2   23.90   15.20
  14   9   2   -7.00   15.60
  14   9   2  -27.60   23.20
  15   9   2  -21.60   28.10
  15   9   2  -12.60   16.20
  15 -10  -2   -3.20   10.60
  14 -10  -2   12.00    7.20
  14 -10  -2    9.10   10.40
  13 -10  -2   17.30    9.60
  13 -10  -2   27.70    7.30
  12 -10  -2   52.49   10.60
  12 -10  -2   49.30    7.90
  11 -10  -2   17.60    8.00
  11 -10  -2   18.80    5.50
  10 -10  -2   -0.20    7.10
  10 -10  -2    4.30    5.00
   9 -10  -2    0.00    5.00
   9 -10  -2    5.30    6.40
   8 -10  -2  222.98   19.80
   8 -10  -2  197.58   17.40
   7 -10  -2    1.40    4.40
   7 -10  -2    0.50    5.70
   6 -10  -2   40.30    6.60
   5 -10  -2  629.24   44.90
   4 -10  -2   10.80    4.80
   3 -10  -2  510.55   37.10
   2 -10  -2  431.16   32.10
   1 -10  -2  536.55   39.20
   0 -10  -2  326.37   25.50
   1  10   2    8.90    4.70
   1  10   2    4.40    5.10
  -2 -10  -2  323.27   22.10
   2  10   2  302.67   26.10
   2  10   2  325.27   25.30
   3  10   2  308.27   26.00
   3  10   2  314.17   25.10
   4  10   2   21.90    6.90
   4  10   2   48.50    8.30
   5  10   2   10.80    6.40
   5  10   2   24.10    7.70
   6  10   2  504.45   38.40
   6  10   2  467.45   38.50
   7  10   2  753.52   53.59
   7  10   2  661.53   52.99
   8  10   2  266.67   25.90
   8  10   2  231.08   24.30
   9  10   2  329.67   22.50
   9  10   2  341.87   32.00
   9  10   2  243.98   29.00
  10  10   2  296.17   31.20
  11  10   2  110.39   20.20
  11  10   2   40.20   15.00
  12  10   2   64.39   17.10
  12  10   2   75.09   21.30
  13  10   2  -12.40   14.90
  13  10   2  -10.90   19.60
  14  10   2   46.80   18.30
  14  10   2   39.40   28.00
  15  10   2  -31.70   28.30
  15  10   2    6.60   17.70
  15 -11  -2   19.80   11.50
  14 -11  -2    9.20   11.00
  14 -11  -2   13.20    7.40
  13 -11  -2    4.60    7.20
  13 -11  -2    9.40    9.60
  12 -11  -2  130.69   18.60
  12 -11  -2  127.59   14.50
  11 -11  -2    2.50    5.80
  11 -11  -2    6.00    7.60
  10 -11  -2   10.70    5.50
  10 -11  -2   10.50    7.20
   9 -11  -2   40.90    9.10
   9 -11  -2   45.50    7.40
   8 -11  -2   37.60    9.00
   8 -11  -2   47.10    7.50
   7 -11  -2    3.40    5.10
   6 -11  -2   96.69   11.50
   5 -11  -2   47.40    7.20
   4 -11  -2   78.59   10.60
   3 -11  -2   11.90    5.10
   2 -11  -2 1094.79   76.79
   1 -11  -2   26.40    6.30
   0 -11  -2  545.15   40.10
   1  11   2    9.70    6.50
  -2 -11  -2   37.30    4.30
   2  11   2   34.20    7.70
   2  11   2   48.20    8.30
   3  11   2  117.79   15.10
   3  11   2  110.69   13.90
   4  11   2   36.10    8.20
   4  11   2   39.80    8.70
   5  11   2  176.68   19.60
   5  11   2  167.08   17.70
   6  11   2   33.60    9.60
   6  11   2   52.49   10.70
   7  11   2   52.89   11.30
   7  11   2   67.09   11.90
   8  11   2   31.40   10.70
   8  11   2   15.00   10.10
   9  11   2  216.08   26.90
   9  11   2  258.17   28.50
  10  11   2  218.78   29.30
  10  11   2  328.27   32.90
  11  11   2   46.70   14.80
  11  11   2   34.50   16.30
  12  11   2    2.80   14.80
  12  11   2   -1.00   17.60
  13  11   2  -23.50   15.60
  13  11   2   17.20   22.90
  14  11   2   56.49   30.40
  14  11   2   42.60   19.90
  14 -12  -2   15.70   11.50
  14 -12  -2    9.50    8.60
  13 -12  -2   55.89   12.60
  13 -12  -2   62.39    9.90
  12 -12  -2   17.30    7.30
  12 -12  -2   15.40   10.30
  11 -12  -2  228.38   22.80
  11 -12  -2  213.88   19.40
  10 -12  -2  293.57   24.20
  10 -12  -2  306.67   26.50
   9 -12  -2   -0.30    7.90
   9 -12  -2    1.60    5.70
   8 -12  -2   44.00    9.90
   8 -12  -2   51.99    8.00
   7 -12  -2  150.48   15.00
   6 -12  -2    9.30    5.90
   5 -12  -2  116.99   13.60
   4 -12  -2   70.59    9.80
   3 -12  -2  205.78   18.90
   2 -12  -2   62.39    8.90
   1 -12  -2   19.10    6.80
   0 -12  -2    5.70    6.30
  -1 -12  -2  114.99   14.20
  -2 -12  -2  740.23   50.09
   2  12   2  734.13   53.49
   2  12   2  718.23   54.69
   3  12   2  125.39   17.30
   3  12   2  111.59   14.20
   4  12   2   93.89   13.50
   4  12   2  120.79   15.40
   5  12   2  135.29   16.20
   5  12   2  130.79   17.50
   6  12   2  231.98   25.70
   6  12   2  291.07   25.60
   7  12   2    2.80    9.10
   7  12   2   11.50   10.00
   8  12   2  131.99   19.00
   8  12   2  162.98   22.80
   9  12   2   64.79   15.80
   9  12   2   80.29   15.30
  10  12   2   -3.00   12.70
  10  12   2   28.80   14.50
  11  12   2  -35.60   13.10
  11  12   2   10.10   15.80
  12  12   2  126.09   25.90
  12  12   2   62.19   19.30
  13  12   2   28.20   18.70
  13  12   2   50.89   25.50
  14  12   2    7.40   18.50
  14  12   2   -9.80   28.10
  14 -13  -2   40.30   10.10
  14 -13  -2   26.90   12.90
  13 -13  -2   31.20    9.00
  13 -13  -2   29.90   11.80
  12 -13  -2   32.80   10.80
  12 -13  -2   23.60    7.90
  11 -13  -2  252.47   23.10
  11 -13  -2  301.87   27.30
  10 -13  -2   40.60   10.90
  10 -13  -2   37.90    8.30
   9 -13  -2   15.90    7.10
   9 -13  -2    9.40    7.90
   8 -13  -2    2.70    6.30
   8 -13  -2   -9.70    7.00
   7 -13  -2  714.13   51.69
   6 -13  -2   11.30    6.10
   5 -13  -2  543.95   40.40
   4 -13  -2   58.39    9.10
   3 -13  -2   46.50    8.80
   2 -13  -2  241.98   21.50
   1 -13  -2   47.30    8.70
   0 -13  -2  200.08   19.50
  -1 -13  -2  181.28   17.70
  -2 -13  -2   27.30    4.20
   2  13   2   19.90    8.10
   3  13   2   -0.70    7.10
   3  13   2   14.10    7.40
   4  13   2   39.50    9.90
   4  13   2   27.00   10.00
   5  13   2   59.39   12.10
   5  13   2   53.69   11.20
   6  13   2    8.00    9.20
   6  13   2    2.20    8.80
   7  13   2  452.05   38.30
   7  13   2  427.96   38.80
   8  13   2  686.83   56.69
   8  13   2  728.43   56.09
   9  13   2   57.19   15.30
   9  13   2   56.89   14.80
  10  13   2   15.90   14.60
  10  13   2   11.70   13.60
  11  13   2   11.40   15.40
  11  13   2   31.90   18.40
  12  13   2    3.00   16.80
  12  13   2  -18.50   20.70
  13  13   2  -38.50   22.10
  13  13   2  -24.50   17.40
  13 -14  -2   38.00   12.60
  13 -14  -2   24.50    8.90
  12 -14  -2   26.30   11.70
  12 -14  -2   13.80    8.20
  11 -14  -2   12.60   10.50
  11 -14  -2   21.50    8.30
  10 -14  -2   -1.80    9.40
  10 -14  -2   -2.10    7.10
   9 -14  -2   10.50    9.40
   9 -14  -2   18.40    7.90
   8 -14  -2  159.18   17.10
   7 -14  -2  470.15   36.20
   6 -14  -2   24.80    7.70
   5 -14  -2    2.00    6.70
   4 -14  -2    7.70    7.60
   3 -14  -2   28.20    8.40
   2 -14  -2   53.29   10.10
   1 -14  -2 1750.72  121.89
   0 -14  -2   95.19   12.90
  -1 -14  -2  271.77   20.30
  -1 -14  -2  268.17   24.80
  -2 -14  -2   19.70    9.00
  -2 -14  -2   22.30    4.30
   2  14   2   20.90    9.90
   3  14   2   -0.30    8.70
   4  14   2   64.79   12.60
   4  14   2   43.90   11.20
   5  14   2    7.10    9.50
   5  14   2   -2.70    8.80
   6  14   2   18.10   11.10
   6  14   2   26.00   10.80
   7  14   2   76.89   15.50
   7  14   2  107.29   16.90
   8  14   2  107.89   18.30
   8  14   2   97.39   16.70
   9  14   2   66.09   16.50
   9  14   2   61.89   16.20
  10  14   2   -3.70   14.60
  10  14   2   48.70   17.50
  11  14   2   10.00   17.20
  11  14   2    0.70   16.00
  12  14   2   34.40   21.80
  12  14   2  -23.50   17.60
  13  14   2   28.20   21.40
  13  14   2  -19.60   26.00
  13 -15  -2   15.20   13.20
  13 -15  -2   -2.20    8.90
  12 -15  -2    4.10   11.30
  12 -15  -2    3.30    8.10
  11 -15  -2   14.00   11.70
  11 -15  -2   27.70    8.90
  10 -15  -2   67.09   14.10
  10 -15  -2   67.99   11.00
   9 -15  -2   -3.70    7.80
   9 -15  -2   -3.70    9.20
   8 -15  -2   36.50    9.00
   7 -15  -2   16.40    7.90
   6 -15  -2  101.29   13.10
   5 -15  -2   78.89   11.40
   4 -15  -2   63.99   10.90
   3 -15  -2   34.00   10.00
   2 -15  -2  221.18   22.20
   1 -15  -2   67.09   11.90
   0 -15  -2  127.89   15.60
  -1 -15  -2   -0.40    7.60
  -1 -15  -2    1.80    4.80
  -2 -15  -2   32.00   10.00
  -2 -15  -2   45.30    5.70
   2  15   2   40.00   12.00
  -3 -15  -2  132.49   18.00
   3  15   2  171.08   22.80
   4  15   2  124.19   17.80
   5  15   2   16.90   11.20
   5  15   2    3.20    9.40
   6  15   2   42.00   13.00
   6  15   2   32.40   12.60
   7  15   2   43.90   13.60
   7  15   2   20.00   12.40
   8  15   2   21.40   13.30
   8  15   2   -1.10   12.70
   9  15   2   -1.70   14.10
   9  15   2    5.80   14.10
  10  15   2   51.99   19.10
  10  15   2   29.40   17.30
  11  15   2   57.89   22.30
  11  15   2   20.30   18.50
  12  15   2   20.50   25.60
  12  15   2  -13.30   19.60
  12 -16  -2    7.70   13.30
  12 -16  -2    4.70    9.20
  11 -16  -2   19.20    9.30
  11 -16  -2   14.20   11.80
  10 -16  -2   27.10   11.20
  10 -16  -2   28.90    9.50
   9 -16  -2   23.90    9.30
   9 -16  -2    9.30   10.40
   8 -16  -2   84.69   12.70
   7 -16  -2  122.29   17.20
   6 -16  -2   21.20    8.60
   5 -16  -2  108.19   14.20
   4 -16  -2   -5.70    8.30
   3 -16  -2   86.39   13.50
   2 -16  -2   34.10    9.90
   1 -16  -2   10.80    8.00
   0 -16  -2   52.19   11.60
  -1 -16  -2   58.79   12.60
  -1 -16  -2   60.89    8.00
  -2 -16  -2   -5.50    8.20
  -2 -16  -2    9.10    4.70
  -3 -16  -2    9.90    9.10
   3  16   2   18.70   12.20
  -4 -16  -2  306.97   29.80
   4  16   2  363.86   34.20
   5  16   2   29.70   13.70
   6  16   2  126.59   19.20
   7  16   2   17.90   12.20
   7  16   2   -2.60   12.80
   8  16   2  168.28   24.10
   8  16   2  194.88   28.70
   9  16   2  191.18   26.60
   9  16   2  232.58   33.90
  10  16   2  120.29   24.40
  10  16   2  118.19   24.20
  11  16   2   10.10   21.10
  11  16   2   48.60   21.80
  12  16   2   57.59   26.70
  12 -17  -2    7.20   13.30
  12 -17  -2    9.10   10.50
  11 -17  -2   35.40   13.90
  11 -17  -2   27.30   10.50
  10 -17  -2   15.00   11.90
  10 -17  -2   23.90   10.00
   9 -17  -2    7.30    9.40
   8 -17  -2  142.49   19.40
   7 -17  -2   26.40   10.10
   6 -17  -2   98.89   14.00
   5 -17  -2  255.37   25.30
   4 -17  -2   94.49   14.40
   3 -17  -2   77.79   14.00
   2 -17  -2   43.70   11.50
   1 -17  -2   20.20   10.20
   0 -17  -2    9.20   10.10
  -1 -17  -2   55.59   12.60
  -2 -17  -2   48.50   12.70
  -3 -17  -2   92.99   14.90
   3  17   2  107.19   17.30
  -4 -17  -2   44.20   12.20
   4  17   2   81.89   16.70
  -5 -17  -2  239.88   29.30
   5  17   2  325.27   32.90
   6  17   2   57.49   15.50
   7  17   2   13.60   14.30
   8  17   2   48.60   17.20
   9  17   2  159.88   25.20
   9  17   2  153.08   25.00
  10  17   2   42.80   19.70
  10  17   2   60.69   22.40
  11  17   2   99.99   27.70
  11  17   2   36.80   23.70
  11 -18  -2   -3.00   11.00
  11 -18  -2   27.20   13.80
  10 -18  -2   -3.40   12.30
  10 -18  -2    1.10   10.60
   9 -18  -2   17.10   10.30
   8 -18  -2   18.30   10.50
   7 -18  -2  145.79   20.80
   6 -18  -2   75.39   13.80
   5 -18  -2   59.39   13.50
   4 -18  -2   10.10    9.90
   3 -18  -2    3.70   10.80
   2 -18  -2   -9.30    9.70
   1 -18  -2    8.60    9.80
   0 -18  -2   66.39   13.00
  -1 -18  -2   49.50   12.60
  -2 -18  -2   35.20   11.60
  -3 -18  -2   33.90   13.30
  -4 -18  -2  284.67   28.90
   4  18   2  276.67   33.70
  -5 -18  -2   17.90   13.00
   5  18   2   27.60   15.30
  -6 -18  -2    8.60   12.70
   6  18   2    7.20   15.30
  -7 -18  -2  -11.00   13.70
   7  18   2   26.50   16.80
  -8 -18  -2   40.10   18.40
   8  18   2   32.70   16.90
   9  18   2   -4.90   17.60
  10  18   2  125.89   26.90
  10 -19  -2    9.80   13.60
  10 -19  -2   -3.20   11.70
   9 -19  -2   10.90   11.80
   8 -19  -2   20.20   11.90
   7 -19  -2   25.30   12.30
   6 -19  -2   19.10   11.00
   5 -19  -2   66.49   15.10
   4 -19  -2  237.38   27.50
   3 -19  -2   15.90   12.10
   2 -19  -2   55.89   14.70
   1 -19  -2   34.40   13.20
   0 -19  -2   40.20   12.80
  -1 -19  -2   52.89   13.40
  -2 -19  -2   36.80   13.90
  -3 -19  -2  134.19   19.40
  -4 -19  -2   61.09   15.50
   4  19   2   89.99   19.00
  -5 -19  -2   10.50   13.30
   5  19   2    7.00   16.50
  -6 -19  -2   96.79   19.80
   6  19   2  102.49   21.30
  -7 -19  -2   23.80   16.60
   7  19   2    6.80   16.60
  -8 -19  -2   -0.80   17.50
   8  19   2   21.00   19.50
  -9 -19  -2   10.80   19.10
   9  19   2   47.90   21.60
   9 -20  -2   24.10   13.00
   8 -20  -2   10.60   12.50
   7 -20  -2   21.20   12.80
   6 -20  -2   21.60   12.90
   5 -20  -2  167.38   21.70
   4 -20  -2   12.00   13.10
   3 -20  -2   92.99   18.40
   2 -20  -2   48.10   15.60
   1 -20  -2  234.38   28.80
   0 -20  -2    4.50   13.00
  -1 -20  -2  316.77   31.90
  -2 -20  -2  218.78   29.00
  -3 -20  -2   62.39   16.20
  -4 -20  -2   27.20   15.50
  -5 -20  -2   -2.50   14.70
   5  20   2    4.00   15.30
  -6 -20  -2  118.49   21.60
   6  20   2   80.49   21.40
  -7 -20  -2   38.90   19.50
   7  20   2   68.39   21.70
  -8 -20  -2  -17.90   18.50
   8  20   2   25.70   20.40
   8 -21  -2   43.90   15.70
   7 -21  -2   64.89   16.30
   6 -21  -2  229.88   29.70
   5 -21  -2   27.30   14.20
   4 -21  -2   23.20   15.20
   3 -21  -2  165.28   23.30
   2 -21  -2   17.00   15.70
   1 -21  -2   -0.40   14.40
   0 -21  -2  -13.80   14.40
  -1 -21  -2   11.70   13.30
  -2 -21  -2   38.60   15.50
  -3 -21  -2    8.40   15.10
  -4 -21  -2   14.20   16.30
  -5 -21  -2   29.50   18.30
   5  21   2   27.70   19.40
  -6 -21  -2   54.89   20.20
   6  21   2   65.29   21.20
  -7 -21  -2   21.00   19.70
   7  21   2   41.50   23.10
   7 -22  -2   77.09   19.20
   6 -22  -2   22.70   16.30
   5 -22  -2   14.30   16.20
   4 -22  -2   15.90   15.60
   3 -22  -2   28.90   17.00
   2 -22  -2   27.70   15.90
   1 -22  -2   -2.10   15.10
   0 -22  -2   33.60   16.70
  -1 -22  -2   17.80   14.80
  -2 -22  -2    7.70   15.70
  -3 -22  -2    2.30   16.70
  -4 -22  -2    1.70   18.00
  -5 -22  -2   20.40   18.70
   5 -23  -2  -13.90   17.20
   4 -23  -2   13.40   16.80
   3 -23  -2    8.70   18.30
   2 -23  -2   10.40   18.00
   1 -23  -2    4.70   18.20
   0 -23  -2   25.70   16.90
  -1 -23  -2  -12.30   15.60
  -2 -23  -2   11.50   18.80
  -3 -23  -2   12.50   18.20
   0 -22   3   -4.10   16.00
   1 -22   3   35.40   18.70
   2 -22   3   25.70   17.30
   3 -22   3   16.50   16.40
   4 -22   3   44.10   18.10
  -3 -21   3   28.60   18.70
  -2 -21   3  102.79   20.60
  -1 -21   3   27.00   16.30
   0 -21   3    1.10   15.00
   1 -21   3   47.60   17.20
   2 -21   3   26.80   15.40
   3 -21   3    9.00   15.30
   4 -21   3   44.20   15.60
   5 -21   3   12.20   14.80
   6 -21   3   45.30   17.10
   7 -21   3    2.60   14.80
   5  20  -3   33.30   20.70
  -5 -20   3   19.40   17.60
   4  20  -3   -1.50   20.00
  -4 -20   3   41.50   17.60
   3  20  -3  148.29   26.70
  -3 -20   3  178.98   24.10
  -2 -20   3   24.50   15.90
  -1 -20   3    4.40   14.00
   0 -20   3   13.50   14.20
   1 -20   3   97.19   18.50
   2 -20   3   49.00   14.90
   3 -20   3  135.59   19.90
   4 -20   3   -7.40   13.30
   5 -20   3   89.69   17.30
   6 -20   3   -1.80   13.00
   7 -20   3   22.60   14.30
   8 -20   3   23.00   14.20
   6  19  -3   80.29   23.00
  -6 -19   3   39.40   18.10
   5  19  -3   -4.20   17.60
  -5 -19   3   -6.00   15.90
   4  19  -3  181.38   28.40
  -4 -19   3  176.98   24.40
   3  19  -3   26.80   17.70
  -3 -19   3   51.19   15.50
   2  19  -3   -0.60   15.10
  -2 -19   3   15.90   14.40
  -1 -19   3   62.39   16.10
   0 -19   3  348.07   34.90
   1 -19   3   29.90   13.40
   2 -19   3   17.00   13.00
   3 -19   3   27.40   13.70
   4 -19   3   45.90   13.90
   5 -19   3   16.60   13.20
   6 -19   3  118.79   17.80
   7 -19   3   19.20   13.00
   8 -19   3   20.70   13.40
   9 -19   3   24.10   13.30
  10 -19   3    3.60   12.90
   8  18  -3  -24.40   21.20
  -8 -18   3   23.90   17.90
   7  18  -3   43.10   20.60
  -7 -18   3    7.40   16.10
   6  18  -3   16.10   18.00
  -6 -18   3    0.20   15.20
   5  18  -3  246.18   37.20
  -5 -18   3  289.27   32.90
   4  18  -3   12.40   16.40
  -4 -18   3    2.30   13.00
   3  18  -3   63.89   18.30
  -3 -18   3   73.99   16.40
   2  18  -3    7.30   16.40
  -2 -18   3   32.70   12.60
  -1 -18   3  182.78   25.60
   0 -18   3  115.29   17.70
   1 -18   3   85.89   15.20
   2 -18   3  406.16   35.40
   3 -18   3   15.60   11.30
   4 -18   3    7.80   10.70
   5 -18   3   59.39   13.50
   6 -18   3  167.58   22.80
   7 -18   3   -6.90   11.10
   8 -18   3  107.79   15.90
   9 -18   3   11.40   12.10
  10 -18   3   18.10   12.50
  11 -18   3   43.10   13.30
   9  17  -3   60.09   25.10
   8  17  -3   80.49   23.70
  -8 -17   3   86.39   19.40
   7  17  -3  -17.50   15.80
  -7 -17   3   10.70   14.60
   6  17  -3   54.49   17.10
  -6 -17   3   61.39   16.00
   5  17  -3   15.00   15.70
  -5 -17   3   16.20   13.60
   4  17  -3    7.40   13.60
  -4 -17   3    9.20   11.60
   3  17  -3   61.59   16.80
  -3 -17   3   52.69   13.00
   2  17  -3  171.78   25.30
  -2 -17   3  227.18   25.50
   1  17  -3   47.30   15.90
  -1 -17   3   77.99   14.90
   0 -17   3   20.40   10.90
   1 -17   3   14.70   10.90
   2 -17   3   50.09   12.50
   3 -17   3    9.40   10.10
   4 -17   3   99.79   14.90
   5 -17   3    5.00    9.70
   6 -17   3   46.10   11.90
   7 -17   3  122.29   16.70
   8 -17   3  122.29   16.40
   9 -17   3   10.20   11.40
  10 -17   3   58.09   13.20
  11 -17   3   13.40   11.40
  11 -17   3   -8.50   12.90
  12 -17   3    3.80   13.50
  12 -17   3    3.20   11.90
   9  16  -3   38.10   23.00
  -9 -16   3   25.50   15.00
   8  16  -3   33.20   20.20
  -8 -16   3   17.70   14.40
   7  16  -3    1.00   14.90
  -7 -16   3   32.20   14.40
   6  16  -3   22.80   14.30
  -6 -16   3   18.10   13.00
   5  16  -3   31.10   13.70
  -5 -16   3   47.50   13.70
   4  16  -3   37.40   14.50
  -4 -16   3   40.30   12.20
   3  16  -3   13.10   12.90
  -3 -16   3   -7.70    9.70
   2  16  -3   18.50   13.20
  -2 -16   3   17.50   10.70
   1  16  -3  106.89   18.60
  -1 -16   3  106.29   16.00
   0 -16   3   12.00    9.40
   1 -16   3  212.08   22.40
   2 -16   3  133.59   17.10
   3 -16   3   -4.40    8.90
   4 -16   3  307.07   28.10
   5 -16   3    8.10    8.40
   6 -16   3   19.80    9.40
   7 -16   3   70.09   12.20
   8 -16   3    8.60    9.50
   9 -16   3    2.30   10.00
  10 -16   3   22.00   10.50
  11 -16   3   84.99   16.00
  11 -16   3  114.49   15.10
  12 -16   3    3.70   10.40
  12 -16   3   -2.00   13.10
  10  15  -3   50.99   25.00
 -10 -15   3  -19.80   14.10
   9  15  -3    6.30   17.80
  -9 -15   3    0.00   13.30
   8  15  -3   29.80   16.80
  -8 -15   3   26.50   13.60
   7  15  -3   19.40   15.50
  -7 -15   3   28.50   13.10
   6  15  -3   21.30   12.10
  -6 -15   3   16.50   11.50
   5  15  -3   22.90   12.20
  -5 -15   3    9.40   11.40
   4  15  -3   42.20   13.00
  -4 -15   3   50.49   12.60
   3  15  -3   -0.10   11.60
  -3 -15   3    4.80    9.30
   2  15  -3   16.90   12.90
  -2 -15   3   46.70   10.90
   1  15  -3   12.10   11.70
  -1 -15   3    9.30    9.50
   0 -15   3  115.99   15.60
   1 -15   3   64.19   11.80
   2 -15   3  156.28   19.40
   3 -15   3   41.20    9.90
   4 -15   3   72.09   12.20
   5 -15   3    1.90    7.90
   6 -15   3  129.39   17.50
   7 -15   3   35.30    9.80
   8 -15   3   16.70    9.40
   9 -15   3    1.30    8.90
  10 -15   3   97.89   14.00
  11 -15   3   -2.70   10.90
  11 -15   3    2.30    9.20
  12 -15   3    3.70    9.90
  12 -15   3    4.10   12.40
  13 -15   3    6.90   10.20
  13 -15   3    2.80   12.80
  11  14  -3   40.20   29.10
 -11 -14   3   21.70   15.40
  10  14  -3   12.20   22.60
 -10 -14   3   -9.00   13.30
   9  14  -3   68.39   21.30
  -9 -14   3   59.89   15.60
   8  14  -3    8.90   16.20
  -8 -14   3   32.90   13.20
   7  14  -3   36.60   16.10
  -7 -14   3   29.60   12.70
   6  14  -3    2.10   11.70
  -6 -14   3    4.70   10.50
   5  14  -3  394.76   39.30
  -5 -14   3  494.25   38.10
   4  14  -3    4.50    9.60
  -4 -14   3    1.70    9.30
   3  14  -3  264.27   28.50
  -3 -14   3  246.38   24.90
   2  14  -3    0.90   10.80
  -2 -14   3   -6.70    4.90
  -2 -14   3   -3.10    8.30
   1  14  -3   34.00   11.50
  -1 -14   3   29.10    8.10
  -1 -14   3   30.80   10.00
   0  14  -3  158.08   22.40
   0 -14   3  137.69   18.50
   1 -14   3  189.18   20.70
   2 -14   3   55.59   10.30
   3 -14   3   59.49   10.90
   4 -14   3   41.30   10.00
   5 -14   3  124.79   16.40
   6 -14   3  536.55   41.00
   7 -14   3   18.40    8.30
   8 -14   3   25.20    9.00
   9 -14   3    7.30    8.30
  10 -14   3  -11.30    7.90
  11 -14   3   17.60   11.00
  11 -14   3   20.10    9.30
  12 -14   3   15.60   11.00
  12 -14   3    1.00    8.40
  13 -14   3   22.40   11.50
  13 -14   3   -2.90    9.10
  14 -14   3   49.90   13.60
  14 -14   3   65.19   12.70
  11  13  -3  -28.20   21.70
 -11 -13   3   -2.60   13.60
  10  13  -3   37.40   21.10
 -10 -13   3   11.70   13.20
   9  13  -3   30.20   17.00
  -9 -13   3   20.40   12.60
   8  13  -3    9.20   13.40
  -8 -13   3    7.30   10.80
   7  13  -3    3.80   12.30
  -7 -13   3   -0.70    9.70
   6  13  -3  187.28   25.20
  -6 -13   3  149.39   18.80
   5  13  -3  255.87   27.80
  -5 -13   3  214.68   24.10
   4  13  -3  137.29   20.90
  -4 -13   3  165.18   19.40
   3  13  -3  265.97   25.70
  -3 -13   3  222.08   23.50
   2  13  -3  239.58   25.60
  -2 -13   3  229.58   17.70
  -2 -13   3  206.68   21.90
   1  13  -3   50.69   12.10
  -1 -13   3   37.60    9.70
  -1 -13   3   41.30    7.80
   0  13  -3   44.10   11.10
   0 -13   3   62.49   10.70
   1 -13   3  151.08   17.80
   2 -13   3   17.20    8.00
   3 -13   3    8.20    7.60
   4 -13   3   25.80    7.90
   5 -13   3   35.00    8.70
   6 -13   3   -3.90    6.60
   7 -13   3   -5.30    7.00
   8 -13   3  268.97   24.00
   9 -13   3  203.08   20.20
  10 -13   3    3.30    8.80
  10 -13   3   15.20    7.90
  11 -13   3    7.00    8.10
  11 -13   3    3.10    8.90
  12 -13   3   25.40   11.40
  12 -13   3   22.30    8.90
  13 -13   3   -0.80   10.00
  13 -13   3    1.20    8.50
  14 -13   3   11.90    9.90
  14 -13   3   14.70   11.60
  12  12  -3   -0.70   28.40
 -12 -12   3   26.30   14.10
  11  12  -3   18.70   23.30
 -11 -12   3    1.10   12.30
  10  12  -3   13.90   18.80
 -10 -12   3    6.70   12.20
   9  12  -3   77.79   19.90
  -9 -12   3   34.30   12.40
   8  12  -3   14.50   13.60
  -8 -12   3  -10.00   10.20
   7  12  -3   75.39   16.10
  -7 -12   3   95.39   14.60
   6  12  -3  231.58   28.10
  -6 -12   3  246.48   24.20
   5  12  -3    3.30    9.10
  -5 -12   3    3.80    8.30
   4  12  -3   11.60    9.20
  -4 -12   3   17.50    8.20
   3  12  -3   18.70    8.80
  -3 -12   3   20.70    7.20
   2  12  -3   16.30    9.70
  -2 -12   3   17.70    4.90
  -2 -12   3    8.20    6.80
   1  12  -3   -2.40    8.10
  -1 -12   3    9.80    6.50
  -1 -12   3    2.40    5.40
   0  12  -3 1873.51  127.69
   0 -12   3 1752.82  125.49
   1 -12   3  138.69   15.00
   2 -12   3    7.30    5.80
   3 -12   3    2.20    6.00
   4 -12   3   82.29   10.90
   5 -12   3  302.77   25.20
   6 -12   3  533.85   39.70
   7 -12   3   52.69    9.20
   8 -12   3  311.97   25.90
   9 -12   3   58.69    9.80
  10 -12   3    1.00    8.40
  10 -12   3    7.60    6.90
  11 -12   3   50.69    9.30
  11 -12   3   48.00   10.70
  12 -12   3   60.59   11.70
  12 -12   3   59.39   10.10
  13 -12   3   10.00   10.00
  13 -12   3   15.50    8.50
  14 -12   3   37.80   11.60
  14 -12   3   26.20   10.00
  15 -12   3   16.60   11.60
  15 -12   3   16.50   10.80
  13  11  -3  -22.10   31.70
  12  11  -3  -52.39   24.60
 -12 -11   3    9.90   12.90
  11  11  -3    0.10   22.70
 -11 -11   3    3.90   11.50
  10  11  -3  262.47   37.20
 -10 -11   3  271.97   28.10
   9  11  -3   93.29   20.30
  -9 -11   3  105.79   15.70
   8  11  -3   96.29   18.30
   8  11  -3  127.09   12.70
  -8 -11   3  134.19   19.10
   7  11  -3   51.39   13.70
   7  11  -3   63.09    8.00
  -7 -11   3   50.19   11.20
   6  11  -3   -1.90    3.40
   6  11  -3    3.20    9.90
  -6 -11   3   -7.50    7.30
   5  11  -3   10.20    9.50
  -5 -11   3   25.60    8.30
   4  11  -3   49.99   11.70
  -4 -11   3   62.39   10.30
   3  11  -3    2.30    7.30
  -3 -11   3    2.10    7.00
   2  11  -3    2.30    7.30
  -2 -11   3    7.30    6.60
  -2 -11   3    6.60    4.10
   1  11  -3  227.08   25.60
  -1 -11   3  305.57   24.10
  -1 -11   3  306.17   21.80
   0  11  -3    0.30    7.50
   0 -11   3    1.60    5.50
   0 -11   3    5.00    5.90
   1 -11   3  618.64   45.60
   2 -11   3  214.78   19.30
   3 -11   3   54.09    8.90
   4 -11   3  152.38   15.20
   5 -11   3 1151.48   80.69
   6 -11   3  221.68   19.50
   7 -11   3  368.96   28.60
   8 -11   3  100.99   13.30
   9 -11   3    0.20    6.20
  10 -11   3   29.60    9.20
  10 -11   3   51.29    8.70
  11 -11   3   20.50    7.40
  11 -11   3   27.00    9.20
  12 -11   3    4.40    8.60
  12 -11   3    3.50    6.90
  13 -11   3    8.30    7.70
  13 -11   3   -3.80    8.60
  14 -11   3    5.20    9.50
  14 -11   3   -5.10    8.30
  15 -11   3   11.80   10.20
  15 -11   3   12.50   11.20
  13  10  -3   16.60   33.20
 -13 -10   3   13.20   12.40
  12  10  -3   31.90   25.90
  11  10  -3   80.79   25.70
  10  10  -3   38.50   11.20
  10  10  -3   20.10   17.00
   9  10  -3  178.48   17.60
   9  10  -3  141.89   22.60
   8  10  -3   35.10   14.60
   8  10  -3   77.39    9.10
   7  10  -3   11.50    5.40
   7  10  -3    5.40    9.90
  -7 -10   3    6.00    8.10
   6  10  -3  177.48   14.50
   6  10  -3  175.28   22.20
  -6 -10   3  181.78   19.80
   5  10  -3   98.09    9.30
   5  10  -3   99.19   14.60
  -5 -10   3   97.49   13.90
   4  10  -3   46.20   10.20
   4  10  -3   42.80    6.10
  -4 -10   3   55.69    9.00
   3  10  -3  239.78   23.10
  -3 -10   3  232.28   20.50
   2  10  -3  199.08   20.70
  -2 -10   3  207.28   18.40
  -2 -10   3  205.98   15.80
   1  10  -3  189.08   19.90
  -1 -10   3  202.38   17.00
  -1 -10   3  170.98   14.90
   0  10  -3  523.55   39.90
   0 -10   3  506.65   38.00
   0 -10   3  512.15   36.90
  -1  10  -3  128.09   15.50
   1 -10   3  130.09   13.80
   2 -10   3  556.94   40.70
   3 -10   3   57.79    8.50
   4 -10   3  117.89   13.20
   5 -10   3    1.10    5.00
   6 -10   3  211.28   18.00
   7 -10   3  221.98   19.20
   8 -10   3   33.50    7.40
   9 -10   3  134.99   13.60
   9 -10   3   95.89   14.90
  10 -10   3  149.09   16.70
  10 -10   3  126.99   14.30
  11 -10   3  165.88   16.90
  11 -10   3  196.88   19.40
  12 -10   3   17.20    8.40
  12 -10   3    2.20    7.00
  13 -10   3    2.90    7.10
  13 -10   3    6.60    8.40
  14 -10   3   -9.10    9.00
  14 -10   3   -1.20    8.10
  15 -10   3   14.80    8.60
  15 -10   3    3.50    9.60
  13   9  -3   34.50   31.20
  12   9  -3    6.50   23.60
  11   9  -3   45.60   22.00
  11   9  -3    9.20   13.20
  10   9  -3  110.89   23.60
  10   9  -3  124.79   15.80
   9   9  -3   23.50    9.10
   9   9  -3   11.00    9.80
   9   9  -3   20.60   14.90
   8   9  -3   36.10    8.00
   8   9  -3   46.50   13.10
   7   9  -3   12.00   11.10
   7   9  -3   36.10    6.70
   6   9  -3   17.50    5.10
   6   9  -3    5.80    8.50
   5   9  -3  157.38   12.70
   5   9  -3  154.78   18.60
  -5  -9   3  141.19   16.00
   4   9  -3  178.28   22.00
   4   9  -3  246.48   17.50
  -4  -9   3  264.27   20.90
   3   9  -3   12.40    3.50
   3   9  -3    3.50    6.50
  -3  -9   3    7.20    5.50
   2   9  -3  944.41   68.39
  -2  -9   3  950.10   65.09
   1   9  -3  274.67   23.80
  -1  -9   3  275.17   22.00
  -1  -9   3  270.97   20.40
   0  -9   3  968.20   66.99
  -1   9  -3   51.99    8.90
   1  -9   3   53.69    7.90
   1  -9   3   61.29    7.60
   2  -9   3  908.01   63.79
   3  -9   3  637.24   45.70
   4  -9   3   76.19    9.30
   5  -9   3  121.59   12.00
   6  -9   3   14.80    5.60
   7  -9   3    5.60    5.20
   8  -9   3   21.60    5.60
   9  -9   3    6.10    5.30
   9  -9   3    2.00    6.00
  10  -9   3   23.70    7.00
  10  -9   3   28.00    6.70
  11  -9   3   -3.10    6.60
  11  -9   3    4.00    5.80
  12  -9   3   11.70    7.40
  12  -9   3   17.10    7.00
  13  -9   3    1.40    7.30
  13  -9   3    6.50    7.50
  14  -9   3    2.90    8.20
  14  -9   3    8.60    7.60
  15  -9   3    4.30    8.00
  15  -9   3   -1.60    8.90
  16  -9   3   33.30   11.90
  16  -9   3   25.80    9.40
  14   8  -3    8.50   33.40
  13   8  -3  -39.40   14.70
  13   8  -3  -62.49   22.70
  12   8  -3  -25.60   11.00
  12   8  -3  -14.10   21.80
  11   8  -3  371.46   34.90
  11   8  -3  416.86   44.70
  10   8  -3    2.50   13.80
  10   8  -3   -2.50   10.40
   9   8  -3   88.79   13.60
   9   8  -3  122.69   20.50
   9   8  -3  120.79   16.10
   8   8  -3   11.10    7.60
   8   8  -3   17.40   11.70
   8   8  -3    1.90    6.80
   7   8  -3  331.47   24.40
   7   8  -3  318.17   29.40
   7   8  -3  287.27   26.70
   6   8  -3  332.67   29.30
   6   8  -3  317.27   24.10
   5   8  -3  323.07   28.20
   5   8  -3  345.27   24.60
   4   8  -3  115.89   14.20
   4   8  -3  106.99    9.90
  -4  -8   3  113.19   12.30
   3   8  -3   41.60    5.10
   3   8  -3   29.10    7.00
  -3  -8   3   39.00    6.70
   2   8  -3  420.16   33.60
   2   8  -3  416.16   30.30
  -2  -8   3  461.65   30.40
  -2  -8   3  418.86   31.80
   1   8  -3    3.40    4.90
  -1  -8   3   -4.10    4.00
  -1  -8   3    2.80    3.20
   0   8  -3   36.00    7.50
   0  -8   3   58.09    6.90
   0  -8   3   43.90    6.60
  -1   8  -3   98.69   11.00
   1  -8   3   96.59   10.30
   1  -8   3   73.79    9.10
   2  -8   3  510.05   36.90
   3  -8   3  259.17   20.10
   4  -8   3 1686.13  115.79
   5  -8   3    4.80    4.00
   6  -8   3  172.88   14.90
   7  -8   3  128.59   12.50
   8  -8   3  395.96   29.30
   9  -8   3    2.00    4.50
   9  -8   3   -3.50    4.90
  10  -8   3    0.10    5.50
  10  -8   3    1.00    4.80
  11  -8   3    7.50    6.30
  11  -8   3    3.20    5.50
  12  -8   3  431.66   33.70
  12  -8   3  468.55   34.90
  13  -8   3   13.30    7.30
  13  -8   3   22.20    7.30
  14  -8   3    3.90    8.00
  14  -8   3    9.50    7.10
  15  -8   3   56.89    9.80
  15  -8   3   58.69   11.20
  16  -8   3    8.50   10.00
  16  -8   3   -3.40    8.10
  14   7  -3  -54.59   27.70
  13   7  -3  -49.40   22.30
  13   7  -3   -1.90   13.10
  12   7  -3   63.49   14.40
  12   7  -3   62.09   26.10
  11   7  -3   51.29   21.70
  11   7  -3   41.10   11.70
  10   7  -3   -4.90   14.20
  10   7  -3   -3.40    8.30
   9   7  -3   23.10   14.10
   9   7  -3    4.60    7.60
   8   7  -3   79.69   15.60
   8   7  -3   66.19   10.70
   7   7  -3   13.90    6.50
   7   7  -3    7.50    6.00
   7   7  -3    8.50    8.60
   6   7  -3  239.88   22.90
   6   7  -3  219.58   18.20
   6   7  -3  230.08   20.00
   5   7  -3   89.29    9.00
   5   7  -3   75.29   11.10
   4   7  -3    2.80    3.20
   4   7  -3    0.70    4.80
  -4  -7   3   -0.50    4.20
   3   7  -3  101.69    8.90
   3   7  -3  103.69   12.10
  -3  -7   3   95.69   10.70
   2   7  -3  124.29   13.50
   2   7  -3  121.29    9.90
  -2  -7   3  118.39   11.60
   1   7  -3   31.90    6.80
   1   7  -3   35.00    4.50
  -1  -7   3   35.00    5.70
  -1  -7   3   38.50    4.80
   0   7  -3  422.56   31.90
   0  -7   3  407.86   30.70
   0  -7   3  434.16   30.10
  -1   7  -3  102.99   11.20
   1  -7   3   86.79    8.90
   1  -7   3   95.39    9.40
   2  -7   3   -0.20    3.70
   2  -7   3   -3.10    3.30
   3  -7   3  363.06   26.80
   4  -7   3    6.10    3.50
   5  -7   3   19.10    4.30
   6  -7   3   69.69    8.80
   7  -7   3    6.10    3.90
   8  -7   3   12.50    5.00
   8  -7   3    6.80    4.30
   9  -7   3   19.70    5.50
   9  -7   3   19.40    5.10
  10  -7   3   80.49    9.80
  10  -7   3   87.69   11.30
  11  -7   3  176.88   16.80
  11  -7   3  174.88   15.70
  12  -7   3  484.85   36.90
  12  -7   3  520.85   37.90
  13  -7   3   22.60    6.80
  13  -7   3   15.90    7.20
  14  -7   3  105.39   14.20
  14  -7   3  117.99   16.00
  15  -7   3   -4.10    7.90
  15  -7   3   -4.60    6.80
  16  -7   3   52.39   10.40
  16  -7   3   59.69   11.60
  14   6  -3  -58.69   24.30
  13   6  -3  -50.29   21.00
  13   6  -3   12.80   12.10
  12   6  -3   10.40   10.20
  12   6  -3  -41.40   17.40
  11   6  -3  -28.20   16.20
  11   6  -3   -6.50    8.70
  10   6  -3    4.60   13.50
  10   6  -3   10.10    8.50
   9   6  -3   65.19   15.40
   9   6  -3   59.89   10.00
   8   6  -3   80.09   10.90
   8   6  -3  108.69   16.90
   7   6  -3  162.08   18.50
   7   6  -3  135.19   15.00
   6   6  -3    7.00    5.10
   6   6  -3    3.20    6.80
   5   6  -3    4.00    4.40
   5   6  -3   -0.80    4.80
   5   6  -3    0.00    3.70
   4   6  -3  430.76   33.90
   4   6  -3  463.45   31.90
   3   6  -3  163.98   15.20
   3   6  -3  162.98   13.00
  -3  -6   3  174.48   14.20
   2   6  -3 1488.65  101.19
   2   6  -3 1482.85  102.99
  -2  -6   3 1480.85  101.89
   1   6  -3   59.29    5.90
   1   6  -3   69.99    9.40
  -1  -6   3   38.60    5.80
  -1  -6   3   60.09    7.20
   0   6  -3   48.80    5.50
   0   6  -3   39.80    6.60
   0  -6   3   50.79    6.20
   0  -6   3   51.89    6.30
  -1   6  -3  145.99   13.10
   1  -6   3  136.19   11.80
   1  -6   3  144.99   11.60
   2  -6   3  516.65   36.40
   2  -6   3  511.95   36.50
   3  -6   3 2629.94  178.88
   4  -6   3  992.20   68.59
   5  -6   3   17.60    4.30
   6  -6   3    9.60    4.00
   7  -6   3  251.87   20.10
   7  -6   3  265.37   19.70
   8  -6   3   19.10    5.00
   8  -6   3   27.30    4.90
   9  -6   3  776.22   53.99
   9  -6   3  767.82   54.39
  10  -6   3   16.10    5.20
  10  -6   3   17.00    5.40
  11  -6   3   82.79   11.20
  11  -6   3   69.29    9.90
  12  -6   3   -1.00    5.40
  12  -6   3   -0.90    5.70
  13  -6   3  227.48   21.20
  13  -6   3  236.18   20.00
  14  -6   3    7.40    6.50
  14  -6   3   18.10    7.50
  15  -6   3   47.80   10.20
  15  -6   3   38.60    8.70
  16  -6   3   19.70    8.50
  16  -6   3   25.40   10.10
  15   5  -3  -25.50   25.80
  14   5  -3  -42.10   23.10
  13   5  -3   20.80   23.70
  13   5  -3   14.70   10.90
  12   5  -3  -37.00   18.80
  12   5  -3    4.50    9.90
  11   5  -3    8.60   17.20
  11   5  -3   27.70    9.60
  10   5  -3  -13.80   14.10
  10   5  -3    5.90    7.20
   9   5  -3  115.59   14.60
   9   5  -3  102.39   18.80
   8   5  -3    8.90    6.20
   8   5  -3   22.80   11.40
   7   5  -3    3.20    5.00
   7   5  -3    3.50    7.70
   6   5  -3  434.16   33.00
   6   5  -3  470.15   36.10
   5   5  -3  588.54   43.30
   5   5  -3  568.84   41.40
  -5  -5   3  580.94   40.60
   4   5  -3  232.68   17.50
   4   5  -3  235.48   18.30
   4   5  -3  221.78   19.30
  -4  -5   3  238.38   17.70
   3   5  -3  603.14   41.90
   3   5  -3  560.34   43.20
  -3  -5   3  625.74   42.20
  -3  -5   3  614.34   42.40
   2   5  -3  483.05   35.40
   2   5  -3  490.15   33.80
  -2  -5   3  442.46   34.20
  -2  -5   3  515.05   34.20
   1   5  -3  342.47   25.10
   1   5  -3  311.77   23.30
  -1  -5   3  349.37   23.90
  -1  -5   3  330.97   23.30
  -1  -5   3  304.77   23.70
   0   5  -3 1686.23  112.79
   0   5  -3 1676.73  111.99
   0   5  -3 1572.74  111.59
   0  -5   3 1654.63  112.49
   0  -5   3 1642.44  111.69
   0  -5   3 1611.84  111.99
  -1   5  -3   28.90    4.70
  -1   5  -3   36.30    4.90
   1  -5   3   42.60    5.20
   1  -5   3   35.90    4.60
   1  -5   3   33.40    5.30
   2  -5   3 1828.42  119.99
   2  -5   3 1637.84  118.99
   2  -5   3 1773.62  119.09
   3  -5   3  180.88   14.10
   3  -5   3  179.88   14.50
   4  -5   3  407.46   29.10
   5  -5   3  201.68   15.60
   6  -5   3 1832.12  124.89
   7  -5   3  217.18   16.80
   7  -5   3  212.48   16.50
   8  -5   3   27.30    4.80
   8  -5   3   26.60    5.00
   9  -5   3    5.40    4.20
   9  -5   3    7.90    4.20
  10  -5   3  232.78   18.50
  10  -5   3  226.58   18.60
  11  -5   3   30.30    5.80
  11  -5   3   17.70    6.00
  12  -5   3   11.50    5.80
  12  -5   3   20.60    5.80
  13  -5   3   44.10    7.10
  13  -5   3   26.00    7.50
  14  -5   3   35.00    7.90
  14  -5   3   50.49    9.20
  15  -5   3    4.80    6.90
  15  -5   3   -1.30    7.60
  16  -5   3    8.70    8.20
  16  -5   3   -7.10    8.50
  17  -5   3   12.60   11.00
  15   4  -3   29.40   26.20
  14   4  -3  -10.80   22.70
  13   4  -3   -0.30   10.30
  13   4  -3  -31.80   19.60
  12   4  -3   -7.50    8.80
  12   4  -3  -37.10   14.90
  11   4  -3    2.40    7.70
  10   4  -3   12.80    7.50
  10   4  -3    5.20   15.40
   9   4  -3   93.89   12.60
   9   4  -3   66.59   16.50
   8   4  -3   -2.90    9.70
   8   4  -3    6.90    5.40
   7   4  -3   29.40    9.50
   7   4  -3   26.00    6.10
  -7  -4   3   26.60    4.30
   6   4  -3  259.37   23.40
   6   4  -3  252.77   20.30
  -6  -4   3  269.47   19.20
   5   4  -3  164.88   16.50
   5   4  -3  170.98   14.10
  -5  -4   3  171.48   13.30
   4   4  -3   78.69   10.30
   4   4  -3   86.19    8.30
  -4  -4   3   82.09    7.70
   3   4  -3 1056.09   77.29
   3   4  -3 1087.29   76.29
  -3  -4   3 1193.28   76.29
   2   4  -3  467.85   32.10
   2   4  -3  430.76   33.00
  -2  -4   3  469.35   32.10
  -2  -4   3  456.65   32.20
   1   4  -3   82.69    9.00
   1   4  -3   85.49    7.70
  -1  -4   3   94.39    7.90
  -1  -4   3   89.99    7.60
  -1  -4   3   96.79    8.60
  -1  -4   3   84.19    7.80
   0   4  -3 2292.57  151.68
   0   4  -3 2095.79  150.78
   0   4  -3 2227.08  150.98
   0  -4   3 2109.19  150.98
   0  -4   3 2378.66  151.58
   0  -4   3 2241.08  150.98
  -1   4  -3  494.35   34.80
  -1   4  -3  485.75   34.60
   1  -4   3  538.95   34.80
   1  -4   3  488.95   35.20
   1  -4   3  474.05   34.70
  -2   4  -3  448.56   32.50
   2  -4   3  489.95   33.10
   2  -4   3  464.45   32.50
   2  -4   3  443.46   32.30
  -3   4  -3  125.99   10.80
   3  -4   3  136.69   10.50
   3  -4   3  125.39   10.70
   4  -4   3  135.99   10.80
   5  -4   3  251.07   18.60
   6  -4   3    5.00    3.00
   6  -4   3    4.70    2.90
   7  -4   3   10.20    3.60
   7  -4   3   11.10    3.30
   8  -4   3  342.17   24.50
   8  -4   3  326.67   24.60
   9  -4   3  782.12   55.09
   9  -4   3  799.42   55.39
  10  -4   3    3.10    4.40
  10  -4   3   -0.30    4.10
  11  -4   3  128.29   12.50
  11  -4   3  123.79   13.30
  12  -4   3   11.00    5.10
  12  -4   3   14.90    6.00
  13  -4   3  150.48   15.70
  13  -4   3  121.19   13.60
  14  -4   3  154.68   15.60
  14  -4   3  140.49   17.00
  15  -4   3   27.50    9.20
  15  -4   3   32.40    8.30
  16  -4   3   -6.40    7.90
  16  -4   3    3.30    9.30
  17  -4   3   13.70    9.60
  17  -4   3   14.70   11.60
  15   3  -3   83.49   26.70
  14   3  -3   25.10   21.70
  13   3  -3   41.30   19.70
  13   3  -3   43.80   10.80
  12   3  -3   -4.80    8.30
  12   3  -3  -35.10   16.30
  11   3  -3  -26.70   14.10
  11   3  -3   -1.70    7.20
  10   3  -3   73.09   18.40
  10   3  -3   94.19   13.40
   9   3  -3   60.69    8.70
   9   3  -3   41.50   13.80
   8   3  -3   -3.90    4.90
   8   3  -3  -12.50    8.70
  -8  -3   3   -2.50    2.90
   7   3  -3  288.17   23.90
   7   3  -3  289.37   28.70
  -7  -3   3  349.67   22.50
   6   3  -3   54.89    7.70
   6   3  -3   64.39   10.10
  -6  -3   3   64.89    6.10
   5   3  -3  344.87   25.10
   5   3  -3  349.47   27.40
  -5  -3   3  345.57   24.40
   4   3  -3  401.46   31.00
   4   3  -3  405.16   29.50
  -4  -3   3  439.86   29.20
   3   3  -3  112.39   10.70
  -3  -3   3  125.29    9.50
   2   3  -3  329.67   25.40
   2   3  -3  330.67   24.80
  -2  -3   3  365.06   24.80
  -2  -3   3  362.26   24.70
  -2  -3   3  368.06   25.30
   1   3  -3  110.89    9.80
   1   3  -3  113.19    9.00
  -1  -3   3  115.19    9.00
  -1  -3   3  105.29    8.80
  -1  -3   3  121.19    9.60
   0   3  -3  283.67   20.30
   0   3  -3  282.77   20.40
   0   3  -3  291.07   21.00
   0  -3   3  275.27   20.30
   0  -3   3  287.57   20.40
   0  -3   3  297.27   20.80
  -1   3  -3  876.81   61.39
  -1   3  -3  887.91   61.69
  -1   3  -3  882.11   61.39
   1  -3   3  885.81   61.39
   1  -3   3  904.61   61.49
   1  -3   3  943.61   61.79
  -2   3  -3 1598.74  106.59
   2  -3   3 1526.75  106.59
   2  -3   3 1448.76  106.39
   2  -3   3 1686.33  106.99
  -3   3  -3   32.70    4.40
   3  -3   3   29.70    4.00
   3  -3   3   28.90    4.40
  -4   3  -3  122.09   10.80
   4  -3   3  122.79    9.90
   5  -3   3  819.02   58.39
   5  -3   3  881.21   58.49
   6  -3   3  344.77   24.00
   6  -3   3  321.37   23.90
   7  -3   3    4.30    3.00
   7  -3   3    5.80    3.40
   8  -3   3    3.40    3.30
   8  -3   3    8.40    3.50
   9  -3   3   -1.20    3.60
   9  -3   3   -1.70    3.70
  10  -3   3  222.08   17.00
  10  -3   3  195.88   17.50
  11  -3   3   24.60    6.00
  11  -3   3   20.20    5.40
  12  -3   3   10.60    5.10
  12  -3   3   18.30    6.40
  13  -3   3    8.80    6.90
  13  -3   3    4.10    5.80
  14  -3   3    7.80    6.70
  14  -3   3   13.60    7.60
  15  -3   3    8.60    7.50
  15  -3   3   -1.70    8.30
  16  -3   3   21.20    9.10
  16  -3   3   18.30   10.80
  17  -3   3  -10.00   10.90
  17  -3   3    7.50    9.20
  15   2  -3   14.20   19.90
  14   2  -3  193.28   28.20
  13   2  -3  128.49   23.40
  13   2  -3  107.89   14.00
  12   2  -3   -0.80    7.90
  11   2  -3   73.19   18.70
  11   2  -3   70.59   10.60
  10   2  -3    3.50    6.30
  10   2  -3  -14.60   12.40
   9   2  -3   36.70   13.80
   9   2  -3   50.49    7.70
   8   2  -3 2013.00  158.98
   8   2  -3 2178.98  155.48
  -8  -2   3 2605.64  154.58
   7   2  -3   90.79   14.90
   7   2  -3  114.79   11.40
  -7  -2   3  133.69    9.50
   6   2  -3  265.57   20.00
   6   2  -3  242.68   23.60
  -6  -2   3  282.77   18.90
   5   2  -3  149.88   11.90
   5   2  -3  145.59   14.50
  -5  -2   3  153.28   11.00
   4   2  -3  313.17   24.10
   4   2  -3  300.17   22.20
  -4  -2   3  323.87   21.80
   3   2  -3  358.16   26.90
   3   2  -3  368.06   25.80
  -3  -2   3  371.06   26.20
  -3  -2   3  377.76   25.60
   2   2  -3  178.58   14.20
  -2  -2   3  192.18   13.30
  -2  -2   3  200.38   13.90
  -2  -2   3  169.38   13.30
   1   2  -3   34.50    4.10
   1   2  -3   33.40    3.50
   1   2  -3   23.60    3.50
  -1  -2   3   31.70    3.50
  -1  -2   3   34.10    4.00
   0   2  -3  827.42   56.69
   0   2  -3  767.82   56.39
   0   2  -3  850.31   56.89
   0  -2   3  806.22   56.39
   0  -2   3  843.32   56.69
   0  -2   3  862.81   56.69
  -1   2  -3   35.80    3.90
  -1   2  -3   33.10    4.20
  -1   2  -3   38.60    4.30
   1  -2   3   44.40    4.40
   1  -2   3   39.30    4.00
   1  -2   3   46.90    4.50
  -2   2  -3  267.07   19.70
  -2   2  -3  281.37   19.80
   2  -2   3  306.67   20.00
   2  -2   3  261.17   19.60
   2  -2   3  271.37   19.90
   3  -2   3  152.28   11.50
   3  -2   3  154.78   11.90
  -4   2  -3  678.23   49.10
   4  -2   3  730.03   48.50
  -5   2  -3  252.57   20.20
   5  -2   3  271.87   19.20
   5  -2   3  264.67   18.90
   6  -2   3  444.76   32.10
   6  -2   3  465.65   32.00
   7  -2   3   -1.30    3.00
   7  -2   3    3.90    2.90
   8  -2   3   31.00    4.80
   8  -2   3   25.80    5.00
   9  -2   3    0.00    3.90
   9  -2   3    4.90    3.80
  10  -2   3  406.96   30.60
  10  -2   3  439.76   31.70
  11  -2   3   -1.10    4.70
  11  -2   3    2.20    5.30
  12  -2   3   -8.30    4.90
  12  -2   3    2.90    6.10
  13  -2   3   67.39    9.30
  13  -2   3   73.99   10.80
  14  -2   3   94.49   12.90
  14  -2   3   85.19   11.20
  15  -2   3   -1.00    7.60
  15  -2   3  -10.00    8.80
  16  -2   3    6.50    8.90
  16  -2   3    3.60   11.10
  17  -2   3   22.00    9.50
  17  -2   3   -0.10   11.90
  15   1  -3    6.60   19.00
  14   1  -3  -11.80   15.40
  13   1  -3  -22.30   14.40
  13   1  -3    6.00    8.10
  12   1  -3   94.79   11.70
  12   1  -3   74.49   17.40
  11   1  -3    6.10   13.90
  11   1  -3   25.90    7.60
  10   1  -3   50.69   14.00
  10   1  -3   45.60    8.30
 -10  -1   3   69.89    7.70
   9   1  -3  353.26   35.20
  -9  -1   3  443.96   29.40
   8   1  -3   65.69   13.30
   8   1  -3   66.89    9.40
  -8  -1   3   99.49    8.00
   7   1  -3   -4.10    6.10
   7   1  -3   12.00    4.00
  -7  -1   3   23.00    3.20
   6   1  -3   -7.10    5.70
   6   1  -3    7.30    3.00
  -6  -1   3    3.90    1.90
   5   1  -3  228.08   22.30
   5   1  -3  287.17   20.10
  -5  -1   3  306.37   19.50
   4   1  -3  109.19   10.90
   4   1  -3  101.99    8.10
  -4  -1   3  104.49    7.60
   3   1  -3  619.74   41.90
   3   1  -3  623.74   43.30
  -3  -1   3  580.34   42.40
  -3  -1   3  629.64   41.80
   2   1  -3  115.59    9.60
  -2  -1   3  123.29    9.10
  -2  -1   3  119.19    8.60
  -2  -1   3  116.59    8.60
   1   1  -3 2553.94  170.18
   1   1  -3 2545.45  169.68
   1   1  -3 2425.36  170.08
  -1  -1   3 2466.05  169.68
  -1  -1   3 2561.74  169.98
   0   1  -3 1706.13  112.69
   0   1  -3 1606.44  112.19
   0   1  -3 1590.24  112.39
   0  -1   3 1798.62  112.69
   0  -1   3 1654.13  112.39
   0  -1   3 1592.64  112.19
  -1   1  -3   20.30    3.00
  -1   1  -3   12.90    2.00
  -1   1  -3   14.10    2.10
   1  -1   3   15.40    2.10
   1  -1   3   20.10    2.60
   1  -1   3   25.10    3.40
  -2   1  -3   45.50    4.40
  -2   1  -3   46.40    4.60
   2  -1   3   45.20    4.70
   2  -1   3   43.50    4.10
  -3   1  -3    5.80    2.30
   3  -1   3    9.00    2.50
   3  -1   3    2.90    1.70
  -4   1  -3  481.15   37.50
   4  -1   3  543.95   36.90
   4  -1   3  579.24   37.30
  -5   1  -3   70.89    7.50
   5  -1   3   75.99    6.50
   5  -1   3   65.89    7.00
  -6   1  -3  898.91   73.59
   6  -1   3 1160.18   73.19
   6  -1   3 1124.69   73.09
   7  -1   3  258.27   20.10
   7  -1   3  273.47   20.00
   8  -1   3   17.00    4.40
   8  -1   3   18.80    4.80
   9  -1   3  219.78   18.90
   9  -1   3  268.87   20.10
  10  -1   3 1753.42  113.19
  10  -1   3 1526.15  112.29
  11  -1   3    5.90    5.40
  11  -1   3    1.50    5.60
  12  -1   3  373.26   29.10
  12  -1   3  341.97   27.60
  13  -1   3   58.69    9.20
  13  -1   3   56.89   10.90
  14  -1   3   -6.20    8.90
  14  -1   3    4.00    7.50
  15  -1   3   -4.90    7.80
  15  -1   3   -3.30    9.40
  16  -1   3   -8.50    8.80
  16  -1   3    2.30   11.90
  17  -1   3   19.90   13.40
  17  -1   3   10.60   10.20
  15   0  -3    6.90   17.30
  14   0  -3   41.00   16.80
  13   0  -3    3.90    7.70
  13   0  -3   -0.80   11.90
  12   0  -3   16.70    7.20
  12   0  -3    1.30   10.90
  11   0  -3  243.28   26.70
  11   0  -3  218.68   19.80
  10   0  -3   28.30    7.30
  10   0  -3   27.70   10.20
 -10   0   3   43.60    6.10
   9   0  -3  149.09   20.60
  -9   0   3  163.28   13.10
   8   0  -3   -6.10    3.90
   8   0  -3  -10.00    7.30
  -8   0   3    9.60    3.00
   7   0  -3  178.08   20.10
  -7   0   3  220.48   15.40
   6   0  -3  194.28   18.60
   5   0  -3   21.10    6.30
   5   0  -3   30.70    4.20
  -5   0   3   37.40    3.80
   4   0  -3    0.80    3.80
   4   0  -3    4.40    1.60
  -4   0   3    6.20    1.40
   3   0  -3  687.23   54.89
   3   0  -3  856.51   53.59
  -3   0   3  856.71   53.49
  -3   0   3  744.73   54.39
   2   0  -3   46.20    5.20
  -2   0   3   45.30    4.70
  -2   0   3   48.20    3.50
  -2   0   3   47.80    3.50
   1   0  -3 1770.02  121.49
   1   0  -3 1863.21  122.09
  -1   0   3 1927.21  121.89
  -1   0   3 1639.04  121.49
   0   0  -3   32.70    2.90
   0   0  -3   30.00    3.80
   0   0  -3   28.40    2.60
   0   0   3   32.90    3.80
   0   0   3   24.60    2.70
   0   0   3   30.30    2.70
  -1   0  -3 1949.60  135.09
  -1   0  -3 2082.49  135.39
   1   0   3 1766.62  134.99
   1   0   3 2123.09  135.39
   1   0   3 2055.39  134.79
  -2   0  -3  182.68   12.50
  -2   0  -3  148.19   12.30
   2   0   3  182.68   12.50
   2   0   3  165.58   12.50
  -3   0  -3  384.86   32.10
   3   0   3  520.05   31.70
   3   0   3  506.95   32.30
   3   0   3  427.56   32.20
  -4   0  -3  642.94   41.60
  -4   0  -3  619.84   41.40
   4   0   3  573.24   41.10
   4   0   3  546.65   41.30
  -5   0  -3  257.67   17.90
   5   0   3  214.28   17.70
   5   0   3  240.48   17.70
   6   0   3  378.96   29.10
   6   0   3  433.96   29.40
   7   0   3    1.90    3.50
   7   0   3   -1.60    3.70
   8   0   3   -1.40    3.80
   8   0   3    3.10    4.70
   9   0   3  343.77   25.30
   9   0   3  285.57   24.00
  10   0   3   -1.10    5.10
  10   0   3    0.90    6.40
  11   0   3  727.33   55.69
  11   0   3  845.82   57.19
  12   0   3   46.60   10.10
  12   0   3   61.39    9.40
  13   0   3   36.20   10.70
  13   0   3   42.90    8.60
  14   0   3   35.70   11.50
  14   0   3   34.00    9.50
  15   0   3   -1.50    8.80
  15   0   3   -1.00   10.80
  16   0   3    5.30   13.50
  16   0   3   15.00    9.60
  17   0   3    4.50   14.30
  17   0   3   29.20   10.90
  16  -1  -3  -10.20   15.10
  15  -1  -3  -13.20   13.50
  14  -1  -3   -4.70   12.60
  13  -1  -3   19.20   12.20
  13  -1  -3   29.60    8.00
  12  -1  -3   32.70    7.70
  12  -1  -3   23.80   10.40
  11  -1  -3   -7.80    9.10
  11  -1  -3   -2.10    5.90
  10  -1  -3   57.59   10.70
  10  -1  -3   67.19    8.40
 -10   1   3   63.49    7.50
   9  -1  -3   15.40    8.20
   9  -1  -3    5.40    4.80
  -9   1   3   12.50    4.40
   8  -1  -3   57.79    9.40
   8  -1  -3   41.40    6.20
  -8   1   3   51.59    6.70
   7  -1  -3  457.75   36.40
  -7   1   3  577.34   36.20
   6  -1  -3   92.49   11.30
  -6   1   3   70.59    6.70
   5  -1  -3  772.32   57.39
  -5   1   3  906.91   57.29
   4  -1  -3   47.50    4.30
   4  -1  -3   67.09    7.70
   3  -1  -3  558.84   37.50
   3  -1  -3  598.24   39.20
  -3   1   3  522.45   37.50
  -3   1   3  538.85   39.00
   2  -1  -3  924.91   57.89
  -2   1   3  751.22   57.59
   1  -1  -3   49.50    3.80
   1  -1  -3   47.80    5.00
  -1   1   3   46.20    4.90
  -1   1   3   57.69    3.70
   0  -1  -3  163.38   12.10
   0  -1  -3  159.68   12.00
   0   1   3  191.68   12.20
  -1  -1  -3  336.27   22.60
   1   1   3  335.87   22.60
   1   1   3  293.37   22.30
  -2  -1  -3 1014.40   70.29
  -2  -1  -3 1119.19   70.19
   2   1   3  958.80   69.59
   2   1   3  904.91   70.19
   2   1   3 1156.28   70.29
  -3  -1  -3  550.14   35.00
  -3  -1  -3  456.45   34.50
   3   1   3  555.74   34.60
   3   1   3  448.16   35.00
  -4  -1  -3   21.10    3.00
  -4  -1  -3   23.80    3.30
   4   1   3   14.50    3.40
   4   1   3   13.60    2.70
  -5  -1  -3  425.66   28.30
  -5  -1  -3  428.56   28.30
   5   1   3  376.76   28.40
   5   1   3  349.96   28.20
  -6  -1  -3  315.97   20.90
   6   1   3  264.47   21.10
   6   1   3  245.38   21.10
   7   1   3   -3.30    4.10
   7   1   3   -1.10    4.00
   8   1   3  312.67   24.00
   8   1   3  305.87   24.90
   9   1   3  179.68   16.50
   9   1   3  179.88   18.30
  10   1   3  127.49   16.60
  10   1   3  114.99   13.70
  11   1   3   60.09    9.60
  11   1   3   55.59   10.60
  12   1   3   -9.70    6.80
  12   1   3  -10.00    8.80
  13   1   3   36.00    9.00
  13   1   3   31.30   11.70
  14   1   3  -19.50    8.10
  15   1   3  110.99   18.30
  15   1   3  110.09   14.70
  16   1   3  -12.80   14.30
  16   1   3    1.00    9.60
  17   1   3    7.80   15.50
  17   1   3    7.80   11.30
  16  -2  -3   -2.10   14.80
  15  -2  -3  -12.80   13.10
  14  -2  -3   72.59   15.40
  13  -2  -3    3.20    7.00
  13  -2  -3   -1.30   10.60
  12  -2  -3   27.80    7.00
  12  -2  -3    7.00    9.90
  11  -2  -3    0.10    5.40
  11  -2  -3   -0.70    8.40
  10  -2  -3   82.59   11.00
  10  -2  -3  120.29   15.10
 -10   2   3   87.89   11.00
   9  -2  -3  152.18   12.70
   9  -2  -3  152.48   16.00
  -9   2   3  118.99   12.50
   8  -2  -3  340.77   25.60
   8  -2  -3  372.16   28.30
   7  -2  -3    0.50    4.90
   7  -2  -3   -2.10    2.70
  -7   2   3   -0.80    2.90
   6  -2  -3  101.59    8.60
   6  -2  -3  114.89   11.60
   5  -2  -3  131.79    9.40
   5  -2  -3  139.89   12.20
  -5   2   3  112.19    9.50
   4  -2  -3   76.19    8.90
   4  -2  -3   84.89    6.50
  -4   2   3   92.89    6.70
   3  -2  -3 1222.38   82.29
   3  -2  -3 1160.68   80.89
  -3   2   3 1210.38   80.99
   2  -2  -3  902.41   60.89
   2  -2  -3  952.30   61.79
   2  -2  -3  909.91   60.79
  -2   2   3  830.02   61.89
   1  -2  -3  271.77   18.50
   1  -2  -3  255.07   18.10
  -1   2   3  270.47   18.60
  -1   2   3  254.47   18.10
   0  -2  -3  190.48   12.20
   0  -2  -3  159.68   12.00
   0   2   3  167.78   12.10
  -1  -2  -3   56.89    5.40
  -1  -2  -3   61.79    4.80
  -1  -2  -3   69.19    5.10
   1   2   3   59.19    5.10
   1   2   3   63.09    5.40
  -2  -2  -3   20.00    2.70
  -2  -2  -3   19.70    2.20
  -2  -2  -3   19.10    2.70
   2   2   3   16.40    2.40
   2   2   3   25.00    3.00
   2   2   3   24.60    3.40
  -3  -2  -3  406.26   25.70
  -3  -2  -3  371.46   25.30
   3   2   3  341.67   26.00
   3   2   3  368.06   25.70
   3   2   3  350.06   25.40
  -4  -2  -3   37.70    4.30
  -4  -2  -3   37.80    3.70
   4   2   3   24.20    4.40
   4   2   3   36.80    4.30
   4   2   3   41.00    4.60
  -5  -2  -3    8.80    2.20
  -5  -2  -3    4.70    2.50
   5   2   3    3.00    2.60
   5   2   3    0.80    3.50
  -6  -2  -3 3023.60  202.38
   6   2   3 3120.49  203.28
   6   2   3 2802.72  203.18
   7   2   3  404.16   28.00
   7   2   3  326.97   27.80
   8   2   3  163.48   16.50
   9   2   3  137.79   14.70
   9   2   3  102.19   15.50
  10   2   3  -16.10    6.10
  10   2   3  -13.10    7.80
  11   2   3  -19.80    7.50
  11   2   3   -4.20    7.20
  12   2   3  499.15   40.70
  12   2   3  451.25   37.30
  13   2   3   -0.70   11.90
  13   2   3    7.90    8.90
  14   2   3   61.09   12.20
  14   2   3   45.30   16.00
  15   2   3    1.80   10.20
  15   2   3  -17.90   14.20
  16   2   3    9.50   16.90
  16   2   3   13.80   11.20
  17   2   3   -5.50   11.30
  17   2   3  -23.10   15.90
  16  -3  -3   -8.30   13.50
  15  -3  -3  -16.50   11.30
  14  -3  -3  -13.60    9.90
  13  -3  -3   -4.00    9.50
  13  -3  -3    0.20    6.40
  12  -3  -3  121.09   17.30
  12  -3  -3  143.29   14.10
  11  -3  -3   80.59   10.50
  11  -3  -3   71.69   11.10
  10  -3  -3  232.38   20.90
  10  -3  -3  216.98   17.80
   9  -3  -3   11.80    6.00
   9  -3  -3    7.50    3.80
  -9   3   3    1.00    4.60
   8  -3  -3  198.08   15.40
   8  -3  -3  217.28   18.30
   7  -3  -3    3.20    4.30
   7  -3  -3    1.90    2.30
  -7   3   3    1.60    3.00
   6  -3  -3   52.89    7.60
   6  -3  -3   52.29    5.20
  -6   3   3   59.89    6.20
   5  -3  -3 1012.10   69.39
   5  -3  -3  997.50   70.79
  -5   3   3 1054.29   69.79
   4  -3  -3  867.51   61.79
   4  -3  -3  931.31   62.99
  -4   3   3  935.41   62.09
   3  -3  -3  403.56   28.70
   3  -3  -3  390.66   27.80
  -3   3   3  424.16   29.50
  -3   3   3  410.76   28.00
   2  -3  -3  392.06   27.40
   2  -3  -3  402.16   27.50
   2  -3  -3  401.46   27.90
   1  -3  -3  984.70   64.29
  -1   3   3  906.11   64.29
   0  -3  -3   14.30    2.00
   0   3   3   13.00    2.00
  -1  -3  -3 1658.43  113.39
  -1  -3  -3 1757.42  113.39
   1   3   3 1598.94  113.39
  -2  -3  -3 1419.26   98.99
  -2  -3  -3 1518.85   99.09
  -2  -3  -3 1449.65   99.09
   2   3   3 1427.76   99.29
   2   3   3 1425.96   99.09
   2   3   3 1513.75   99.09
  -3  -3  -3  283.47   20.20
  -3  -3  -3  302.87   20.50
  -3  -3  -3  281.17   20.10
   3   3   3  290.77   20.30
   3   3   3  301.67   21.00
   3   3   3  275.07   20.50
  -4  -3  -3    6.80    2.10
  -4  -3  -3    9.80    1.80
   4   3   3    3.70    2.70
   4   3   3    3.80    2.10
   4   3   3    4.60    2.10
  -5  -3  -3 2392.36  152.28
  -5  -3  -3 2263.97  152.18
   5   3   3 2012.40  153.18
   5   3   3 2302.17  152.88
   6   3   3  155.58   12.30
   6   3   3   96.49   12.30
   7   3   3   66.19    9.30
   7   3   3  100.49   11.20
   8   3   3  228.28   20.00
   8   3   3  221.78   20.70
   9   3   3   -3.50    6.90
   9   3   3  -11.50    6.50
  10   3   3   -3.10    7.20
  10   3   3  -15.90    8.40
  11   3   3   95.69   13.30
  11   3   3   55.99   13.60
  12   3   3  114.29   14.60
  12   3   3   77.39   16.40
  13   3   3   71.69   12.60
  13   3   3   28.30   14.80
  14   3   3  121.49   21.80
  14   3   3  129.49   16.70
  15   3   3   76.09   14.00
  15   3   3   42.10   17.80
  16   3   3   -5.10   17.10
  16   3   3  -13.70   11.20
  17   3   3  -41.00   18.80
  16  -4  -3   17.10   13.70
  15  -4  -3   16.10   11.60
  14  -4  -3   21.50   11.20
  13  -4  -3   78.89   13.00
  13  -4  -3  104.59   12.20
  12  -4  -3  139.39   13.40
  12  -4  -3  125.19   16.90
  11  -4  -3   11.20    4.70
  11  -4  -3   12.00    7.50
  10  -4  -3   79.39    9.00
  10  -4  -3   89.29   12.70
   9  -4  -3  323.57   26.20
   9  -4  -3  339.87   24.00
   8  -4  -3   31.90    4.00
   8  -4  -3   18.80    5.50
  -8   4   3   28.30    5.20
   7  -4  -3   60.19    8.70
   7  -4  -3   57.59    5.80
  -7   4   3   58.19    6.50
   6  -4  -3  846.42   60.29
   6  -4  -3  850.11   58.99
  -6   4   3  898.81   59.69
   5  -4  -3 1923.71  135.29
   5  -4  -3 1978.50  136.39
  -5   4   3 2096.89  135.89
   4  -4  -3  358.56   25.50
   4  -4  -3  349.57   24.50
  -4   4   3  352.56   24.90
   3  -4  -3   28.00    3.90
   3  -4  -3   33.10    3.60
   2  -4  -3  286.27   19.80
   2  -4  -3  271.97   19.70
   1  -4  -3  415.86   28.00
  -1   4   3  386.36   27.90
   0  -4  -3 1210.28   80.49
   0   4   3 1152.08   80.49
  -1  -4  -3 2298.27  152.68
  -1  -4  -3 2302.77  152.78
   1   4   3 2153.18  152.68
  -2  -4  -3 3854.01  250.67
  -2  -4  -3 3620.84  250.17
  -2  -4  -3 3737.83  250.57
   2   4   3 3583.34  250.67
   2   4   3 3837.52  250.17
   2   4   3 3586.34  250.67
  -3  -4  -3  993.10   65.99
  -3  -4  -3  955.60   65.89
  -3  -4  -3  954.20   65.49
   3   4   3  961.00   66.39
   3   4   3  972.30   65.59
   3   4   3  943.01   66.19
  -4  -4  -3   79.79    6.70
  -4  -4  -3   77.79    6.90
   4   4   3   77.29    7.80
   4   4   3   70.59    6.40
   4   4   3   69.09    7.30
  -5  -4  -3   44.70    5.00
   5   4   3   36.40    6.20
   5   4   3   35.50    5.10
   5   4   3   39.10    4.80
   6   4   3 1085.49   72.69
   6   4   3  998.60   73.09
   7   4   3  173.28   18.20
   7   4   3  242.68   18.70
   8   4   3   53.99    8.80
   8   4   3   24.30    7.70
   9   4   3   41.20    9.40
   9   4   3   41.90    9.50
  10   4   3   30.80    9.40
  10   4   3   33.70   11.60
  11   4   3   13.20   10.00
  11   4   3   -3.60   10.00
  12   4   3  385.66   30.90
  12   4   3  276.17   35.60
  13   4   3    2.30   10.90
  13   4   3  -21.20   13.70
  14   4   3   58.39   19.00
  14   4   3   79.39   14.50
  15   4   3  -21.70   18.00
  15   4   3  -19.70   11.40
  16   4   3    3.10   11.70
  16   4   3  -30.10   17.40
  15  -5  -3   33.60   12.10
  14  -5  -3  145.99   19.60
  13  -5  -3    3.40    5.50
  13  -5  -3   -3.60    7.50
  12  -5  -3    2.60    7.00
  12  -5  -3   11.10    4.80
  11  -5  -3  123.79   11.80
  11  -5  -3  138.39   14.60
  10  -5  -3   58.09    8.80
  10  -5  -3   69.19    7.50
   9  -5  -3   18.90    3.70
   9  -5  -3   15.20    5.70
   8  -5  -3  136.19   10.80
   8  -5  -3  132.49   13.20
  -8   5   3  136.09   13.30
   7  -5  -3  215.88   15.30
   7  -5  -3  218.38   17.10
  -7   5   3  195.78   16.80
   6  -5  -3  331.37   25.10
   6  -5  -3  345.37   23.70
  -6   5   3  336.57   24.70
   5  -5  -3   36.60    5.20
   5  -5  -3   36.30    4.50
  -5   5   3   40.90    5.70
   4  -5  -3  474.95   32.50
   4  -5  -3  450.55   33.10
  -4   5   3  476.05   32.90
   3  -5  -3  662.33   48.50
   3  -5  -3  722.33   48.40
   3  -5  -3  713.53   48.20
   2  -5  -3 2279.37  156.68
   2  -5  -3 2341.67  156.78
   1  -5  -3  898.11   60.99
  -1   5   3  878.11   60.89
   0  -5  -3 3236.48  211.78
   0   5   3 3013.30  211.68
  -1  -5  -3  411.86   27.40
  -1  -5  -3  392.06   27.60
   1   5   3  369.06   27.60
   1   5   3  374.86   27.40
  -2  -5  -3   31.70    3.40
  -2  -5  -3   35.80    4.40
  -2  -5  -3   40.00    4.80
   2   5   3   32.00    4.40
  -3  -5  -3    0.50    1.30
  -3  -5  -3    4.00    2.40
  -3  -5  -3    0.10    2.40
   3   5   3    1.30    2.60
   3   5   3    0.50    1.50
   3   5   3    4.40    2.80
  -4  -5  -3  677.63   45.30
  -4  -5  -3  609.24   45.00
   4   5   3  632.74   45.70
   4   5   3  669.93   46.00
   4   5   3  659.43   44.60
  -5  -5  -3  715.53   50.59
   5   5   3  708.13   51.39
   5   5   3  752.82   51.79
   5   5   3  744.53   50.19
   6   5   3  185.98   14.40
   6   5   3  178.58   16.80
   6   5   3  206.48   16.40
   7   5   3   66.39    9.90
   7   5   3   72.99   10.50
   8   5   3  534.35   40.90
   9   5   3  255.77   22.90
   9   5   3  174.38   20.60
  10   5   3  293.17   27.60
  10   5   3  267.77   26.90
  11   5   3  300.07   27.00
  11   5   3  224.38   29.30
  12   5   3  -17.50    9.30
  13   5   3    5.10   11.60
  14   5   3   12.50   11.80
  14   5   3  -32.40   16.80
  15   5   3   64.69   14.80
  15   5   3   -2.00   19.90
  16   5   3  -21.70   12.00
  16   5   3  -49.99   19.30
  15  -6  -3   49.70   11.80
  14  -6  -3   34.20   10.00
  13  -6  -3    7.90    5.40
  13  -6  -3   13.60    8.30
  12  -6  -3   22.90    7.80
  12  -6  -3   27.00    5.40
  11  -6  -3  400.46   29.00
  11  -6  -3  410.26   31.70
  10  -6  -3    9.70    6.20
  10  -6  -3   23.80    4.20
   9  -6  -3   51.89    6.50
   9  -6  -3   35.90    7.00
   8  -6  -3   84.89   10.50
   8  -6  -3   84.49    7.90
   7  -6  -3   63.69    8.90
   7  -6  -3   54.89    6.00
  -7   6   3   44.50    6.80
   6  -6  -3   10.00    4.10
   6  -6  -3   13.00    2.80
  -6   6   3    8.20    4.00
   5  -6  -3 1242.08   84.19
   5  -6  -3 1200.28   84.89
  -5   6   3 1255.77   84.69
   4  -6  -3  297.47   23.20
   4  -6  -3  320.17   22.70
  -4   6   3  333.37   23.30
   3  -6  -3  110.19    9.40
   3  -6  -3  119.39    9.90
   2  -6  -3  792.52   53.69
   2  -6  -3  758.02   53.59
   1  -6  -3  785.22   54.29
   0  -6  -3   21.10    4.40
   0  -6  -3   17.80    3.50
   0   6   3   12.50    3.30
  -1  -6  -3   63.49    7.10
  -1  -6  -3   70.19    7.30
   1   6   3   69.99    7.30
   1   6   3   60.99    6.90
  -2  -6  -3   64.89    6.40
  -2  -6  -3   59.99    4.90
  -2  -6  -3   52.09    6.60
   2   6   3   55.99    7.00
   2   6   3   55.59    6.90
  -3  -6  -3 1583.84  111.49
  -3  -6  -3 1731.13  112.89
   3   6   3 1592.84  113.09
   3   6   3 1690.43  113.09
  -4  -6  -3 1310.87   87.99
   4   6   3 1278.17   88.39
   4   6   3 1280.37   86.79
   4   6   3 1246.08   88.39
   5   6   3   37.70    4.40
   5   6   3   29.40    5.80
   5   6   3   36.50    6.50
   6   6   3  825.22   57.49
   6   6   3  800.12   56.99
   6   6   3  786.12   55.19
   7   6   3    5.60    5.20
   7   6   3    3.90    3.50
   7   6   3   10.50    6.00
   8   6   3  471.65   40.80
   8   6   3  594.14   41.30
   9   6   3  308.37   27.60
  10   6   3   24.60   11.10
  10   6   3   39.10   10.70
  11   6   3  -18.60    8.70
  11   6   3   -7.30   10.00
  12   6   3   85.99   15.20
  12   6   3   41.00   16.20
  13   6   3   -6.90   15.50
  13   6   3   -2.50   12.30
  14   6   3  109.39   17.40
  14   6   3   72.69   23.30
  15   6   3   -3.80   13.00
  15   6   3  -28.40   21.30
  16   6   3  -35.50   21.80
  16   6   3   -6.90   13.60
  15  -7  -3   26.00   11.10
  14  -7  -3   15.70    9.10
  13  -7  -3    4.80    7.30
  13  -7  -3    6.80    5.10
  12  -7  -3   -1.10    4.50
  12  -7  -3    8.40    6.60
  11  -7  -3   70.89    8.20
  11  -7  -3   47.10    8.60
  10  -7  -3   49.10    5.90
  10  -7  -3   35.80    7.60
   9  -7  -3   51.89    8.00
   9  -7  -3   72.99    7.60
   8  -7  -3   23.00    5.90
   8  -7  -3   22.30    3.80
   7  -7  -3  146.89   13.40
   7  -7  -3  131.19   11.20
   6  -7  -3  254.17   19.10
   6  -7  -3  263.77   20.40
   5  -7  -3  232.28   16.40
   5  -7  -3  225.18   17.50
  -5   7   3  185.98   17.00
   4  -7  -3 1082.59   74.39
   3  -7  -3  670.23   47.60
   3  -7  -3  687.73   47.40
   2  -7  -3  138.19   11.40
   2  -7  -3  123.99   11.10
   1  -7  -3   79.79    8.20
   0  -7  -3  160.08   12.90
   0  -7  -3  156.38   13.70
   0   7   3  147.29   12.70
  -1  -7  -3    3.90    3.50
  -1  -7  -3    6.50    3.20
   1   7   3    0.40    3.10
   1   7   3    3.20    3.10
  -2  -7  -3 1491.65  104.69
  -2  -7  -3 1525.55  103.29
   2   7   3 1524.95  104.99
   2   7   3 1555.44  104.69
  -3  -7  -3  609.24   47.00
  -3  -7  -3  637.44   45.30
   3   7   3  723.33   47.50
   3   7   3  711.23   47.70
   4   7   3   18.90    5.00
   4   7   3   23.30    5.50
   5   7   3   18.20    5.30
   5   7   3   21.70    5.80
   5   7   3   16.50    2.80
   6   7   3  276.87   20.30
   6   7   3  289.07   23.30
   6   7   3  290.97   23.40
   7   7   3   64.09    9.60
   7   7   3   76.79   10.90
   7   7   3   67.29    7.20
   8   7   3  263.07   21.80
   8   7   3  205.28   21.20
   8   7   3  201.98   16.90
   9   7   3   10.20    5.80
   9   7   3   29.70    8.90
   9   7   3   15.10    9.40
  10   7   3    8.50    9.30
  10   7   3   44.70   12.10
  11   7   3   -0.80   11.90
  11   7   3    3.50   10.10
  12   7   3   13.90   15.60
  12   7   3   40.30   13.50
  13   7   3  -23.10   12.00
  13   7   3  -20.90   16.10
  14   7   3    4.70   13.40
  14   7   3  -47.00   18.40
  15   7   3  -17.60   23.80
  15   7   3   16.20   14.50
  16   7   3   14.70   15.90
  16   7   3  -17.00   24.90
  15  -8  -3    0.00   10.10
  14  -8  -3   19.50    8.80
  13  -8  -3    7.60    7.40
  13  -8  -3   -0.70    5.50
  12  -8  -3    5.70    7.20
  12  -8  -3   15.30    5.00
  11  -8  -3   -5.70    5.90
  11  -8  -3    0.10    4.40
  10  -8  -3    2.30    6.10
  10  -8  -3    1.70    4.00
   9  -8  -3   45.20    5.60
   9  -8  -3   35.50    7.50
   8  -8  -3   32.70    6.80
   8  -8  -3   37.30    5.20
   7  -8  -3    1.40    4.40
   7  -8  -3   -2.30    3.20
   6  -8  -3   48.70    6.60
   6  -8  -3   34.70    6.20
   5  -8  -3  674.43   47.20
   4  -8  -3   29.10    4.80
   3  -8  -3  600.34   42.40
   2  -8  -3   86.69    9.10
   1  -8  -3  463.25   33.40
   0   8   3  221.48   17.60
   1   8   3  376.16   27.80
   2   8   3   14.20    4.90
   2   8   3    6.30    3.80
   3   8   3   39.90    6.80
   3   8   3   48.00    6.70
   4   8   3  831.62   60.69
   4   8   3  877.91   60.49
   5   8   3  401.26   30.20
   5   8   3  378.66   30.10
   6   8   3  313.77   26.60
   6   8   3  366.26   27.50
   6   8   3  324.97   23.10
   7   8   3   92.09    8.30
   7   8   3   81.39   11.60
   7   8   3   90.19   11.90
   8   8   3  201.98   16.60
   8   8   3  212.18   21.90
   8   8   3  233.98   22.20
   9   8   3  766.62   50.89
   9   8   3  612.94   49.90
   9   8   3  587.34   45.30
  10   8   3   60.49   13.40
  10   8   3   45.20   12.00
  11   8   3   -7.30   11.00
  11   8   3   -5.10   11.90
  12   8   3  -11.70   14.60
  12   8   3   -6.60   12.20
  13   8   3  -18.80   13.20
  13   8   3  -10.00   17.90
  14   8   3  -52.29   19.90
  14   8   3   -2.50   14.30
  15   8   3  -16.10   24.70
  15   8   3   42.60   16.20
  16   8   3  -22.80   27.40
  15  -9  -3    8.50   10.70
  14  -9  -3   11.80    9.50
  14  -9  -3   -6.30    9.10
  13  -9  -3    8.00    8.90
  13  -9  -3   20.80    6.10
  12  -9  -3   -0.30    7.00
  12  -9  -3   -3.30    5.60
  11  -9  -3    1.70    4.70
  11  -9  -3   -1.70    6.30
  10  -9  -3   -0.60    6.50
  10  -9  -3   -0.40    4.20
   9  -9  -3    5.60    4.20
   9  -9  -3   -3.40    5.40
   8  -9  -3  137.99   15.00
   8  -9  -3  138.59   12.40
   7  -9  -3  112.09   13.20
   7  -9  -3  125.09   11.40
   6  -9  -3   20.20    6.00
   6  -9  -3   19.10    4.60
   5  -9  -3    8.70    4.10
   4  -9  -3  451.65   32.80
   3  -9  -3  926.21   64.59
   2  -9  -3  710.33   50.19
   1  -9  -3  190.78   16.20
   0   9   3  218.18   17.80
   1   9   3  263.67   20.60
   2   9   3  768.82   54.49
   2   9   3  769.02   55.09
   3   9   3    5.20    4.70
   3   9   3   -2.20    4.30
   4   9   3  155.08   16.00
   4   9   3  170.98   15.80
   5   9   3    3.50    6.20
   5   9   3   13.70    6.20
   6   9   3   28.80    7.80
   6   9   3   29.80    8.50
   7   9   3  131.89    9.90
   7   9   3  121.29   16.40
   7   9   3  141.19   17.30
   8   9   3    4.20    7.00
   8   9   3    5.50    4.00
   8   9   3    4.80    8.50
   9   9   3   -1.80    8.90
   9   9   3    7.70    8.90
   9   9   3    3.60    4.80
  10   9   3   34.50   12.10
  10   9   3   30.40    7.30
  10   9   3   46.30   13.60
  11   9   3    0.70   12.60
  11   9   3   -9.50   11.50
  12   9   3  105.89   18.60
  12   9   3  133.99   23.70
  13   9   3    2.20   14.90
  13   9   3  -12.50   17.10
  14   9   3    9.70   16.20
  14   9   3   -2.50   22.50
  15   9   3  -56.19   25.10
  15   9   3   19.80   16.90
  15 -10  -3   -2.40   11.10
  14 -10  -3   23.20    8.00
  14 -10  -3   11.50   10.10
  13 -10  -3   11.60    6.00
  13 -10  -3    9.20    8.50
  12 -10  -3   61.39   11.00
  11 -10  -3  128.59   16.60
  11 -10  -3  123.09   12.90
  10 -10  -3    2.60    4.90
  10 -10  -3    4.20    7.00
   9 -10  -3   43.20    6.40
   9 -10  -3   32.10    8.00
   8 -10  -3   54.69    7.00
   8 -10  -3   43.70    8.50
   7 -10  -3  222.28   20.50
   7 -10  -3  255.47   19.30
   6 -10  -3   10.00    4.60
   5 -10  -3   67.79    9.10
   4 -10  -3  355.56   26.80
   3 -10  -3  154.68   14.10
   2 -10  -3   37.10    6.40
   1 -10  -3    6.40    4.50
   1  10   3   67.49    8.80
   2  10   3  639.74   47.10
   2  10   3  670.93   48.00
   3  10   3  812.32   59.59
   3  10   3  840.32   59.09
   4  10   3  121.69   14.00
   4  10   3   94.49   12.10
   5  10   3    2.50    5.60
   5  10   3   -4.90    5.40
   6  10   3   53.99   10.10
   6  10   3   34.30    8.80
   7  10   3  125.99   17.10
   7  10   3  115.69   15.20
   8  10   3   13.20    8.50
   8  10   3    8.60    8.90
   9  10   3   63.09    8.10
   9  10   3   66.89   13.00
   9  10   3   58.99   13.10
  10  10   3  133.99   19.20
  10  10   3   92.69   17.20
  11  10   3   38.90   15.00
  11  10   3   86.69   17.60
  12  10   3  -17.90   13.30
  12  10   3   -9.70   16.40
  13  10   3    7.80   15.50
  13  10   3    9.90   21.00
  14  10   3  -54.79   21.80
  14  10   3  -26.10   16.70
  15  10   3   28.40   31.40
  14 -11  -3   10.50    7.30
  14 -11  -3    1.40   10.60
  13 -11  -3   79.89   13.30
  13 -11  -3   95.59   11.00
  12 -11  -3   -1.50    8.10
  12 -11  -3   -3.70    6.30
  11 -11  -3    7.80    5.30
  11 -11  -3    4.80    7.80
  10 -11  -3   31.50    8.60
  10 -11  -3   31.20    6.50
   9 -11  -3  228.58   22.10
   9 -11  -3  245.68   19.90
   8 -11  -3   12.20    7.50
   8 -11  -3   17.80    6.00
   7 -11  -3    3.90    6.20
   7 -11  -3    8.50    5.00
   6 -11  -3    5.80    4.90
   5 -11  -3  420.96   31.50
   4 -11  -3  136.19   13.70
   3 -11  -3   38.60    7.20
   2 -11  -3   25.80    6.60
   1 -11  -3  317.17   25.30
   0 -11  -3  356.56   27.70
   1  11   3  337.57   26.60
   2  11   3   49.80    8.90
   2  11   3   61.79    8.80
   3  11   3   34.40    7.80
   3  11   3   36.60    7.80
   4  11   3   64.19   10.10
   4  11   3   43.30    8.80
   5  11   3   85.39   13.00
   5  11   3  118.59   14.30
   6  11   3 1442.86   94.59
   6  11   3 1216.18   94.19
   7  11   3 1116.79   77.29
   7  11   3 1005.60   76.99
   8  11   3   11.90   10.00
   8  11   3    7.60    9.40
   9  11   3   16.60   10.70
   9  11   3   -1.90   10.60
  10  11   3   -0.30   12.00
  10  11   3  -12.60   11.20
  11  11   3   -0.70   13.80
  11  11   3   14.10   14.50
  12  11   3   -9.90   15.40
  12  11   3  -28.60   14.00
  13  11   3   25.80   18.10
  13  11   3   57.59   23.50
  14  11   3   12.20   25.80
  14  11   3   12.60   18.60
  15  11   3   -7.10   29.00
  14 -12  -3   44.90   12.90
  14 -12  -3   48.80    9.40
  13 -12  -3   38.90   11.40
  13 -12  -3   52.69    9.20
  12 -12  -3    1.10    9.00
  12 -12  -3    3.80    6.70
  11 -12  -3    3.80    6.10
  11 -12  -3    7.10    8.70
  10 -12  -3  220.98   21.90
  10 -12  -3  228.68   19.60
   9 -12  -3  167.98   15.60
   9 -12  -3  151.38   18.60
   8 -12  -3  130.69   14.20
   8 -12  -3  144.99   17.40
   7 -12  -3    3.30    5.70
   7 -12  -3    5.60    6.70
   6 -12  -3   50.39    8.00
   5 -12  -3   88.59   11.90
   4 -12  -3   17.10    6.10
   3 -12  -3  120.39   13.50
   2 -12  -3 1251.27   87.59
   1 -12  -3  268.57   22.30
   0 -12  -3   21.30    7.00
   2  12   3  355.06   28.30
   2  12   3  350.26   29.40
   3  12   3  552.34   42.10
   3  12   3  558.34   43.10
   4  12   3  116.29   14.90
   4  12   3  152.28   18.10
   5  12   3   71.79   11.50
   5  12   3  106.59   13.60
   6  12   3 1878.51  127.19
   6  12   3 1740.23  127.09
   7  12   3  193.08   23.70
   7  12   3  212.98   22.90
   8  12   3   14.60   10.30
   8  12   3    5.10    9.80
   9  12   3    8.90   12.10
   9  12   3   15.40   11.60
  10  12   3   18.20   13.40
  10  12   3   20.40   13.40
  11  12   3    6.20   14.10
  11  12   3   -0.80   14.10
  12  12   3  100.89   22.70
  12  12   3   80.39   19.60
  13  12   3   23.90   22.50
  13  12   3    4.90   18.20
  14  12   3   25.00   26.60
  14  12   3    6.40   19.90
  14 -13  -3    6.90   11.80
  14 -13  -3   17.30    9.10
  13 -13  -3   18.80   11.90
  13 -13  -3    6.30    8.30
  12 -13  -3   -3.10   10.20
  12 -13  -3    4.10    7.40
  11 -13  -3  118.99   17.60
  11 -13  -3  125.19   14.80
  10 -13  -3   67.09    9.80
  10 -13  -3   79.79   12.60
   9 -13  -3    7.10    6.70
   9 -13  -3    1.90    8.00
   8 -13  -3    3.90    6.20
   8 -13  -3    9.50    8.70
   7 -13  -3   10.10    6.20
   6 -13  -3  123.79   14.20
   5 -13  -3  450.35   34.30
   4 -13  -3  155.78   16.40
   3 -13  -3 1595.14  110.99
   2 -13  -3   13.20    6.90
   1 -13  -3   32.70    8.10
   0 -13  -3   46.70    9.10
  -1 -13  -3  699.13   51.59
   2  13   3  605.94   45.20
   2  13   3  596.34   46.30
   3  13   3   32.40    9.10
   3  13   3   27.80    8.30
   4  13   3   -2.20    7.70
   4  13   3    2.10    7.50
   5  13   3   45.90   11.20
   5  13   3   38.90   10.60
   6  13   3  863.11   67.29
   6  13   3  947.21   67.39
   7  13   3   36.10   11.30
   7  13   3   21.60   10.30
   8  13   3   -2.80   10.40
   8  13   3    6.40   11.20
   9  13   3   18.40   12.30
   9  13   3   11.80   12.60
  10  13   3   56.09   16.80
  10  13   3   32.20   15.50
  11  13   3  -14.10   15.00
  11  13   3   18.80   17.00
  12  13   3   30.60   18.20
  12  13   3   65.49   22.90
  13  13   3  -13.10   18.00
  13  13   3   50.19   25.30
  14  13   3   14.40   21.40
  14  13   3  -21.40   27.00
  13 -14  -3    7.30   12.10
  13 -14  -3    6.10    8.30
  12 -14  -3   14.00    8.20
  12 -14  -3   19.90   11.80
  11 -14  -3   82.19   13.90
  11 -14  -3   81.99   11.30
  10 -14  -3   19.80    8.10
  10 -14  -3   21.80    9.80
   9 -14  -3   37.60    8.60
   9 -14  -3   29.50   10.10
   8 -14  -3    2.70    8.30
   8 -14  -3    9.50    7.00
   7 -14  -3  130.99   15.40
   6 -14  -3    7.80    7.00
   5 -14  -3  142.89   16.40
   4 -14  -3   57.39    9.90
   3 -14  -3  238.58   22.00
   2 -14  -3   49.70    9.20
   1 -14  -3   93.49   12.50
   0 -14  -3   42.50    9.50
  -1 -14  -3   45.60    9.80
  -2 -14  -3   44.80    5.10
   2  14   3   28.30    9.40
   3  14   3   -2.80    7.80
   3  14   3   -2.10    8.00
   4  14   3   50.59   11.10
   4  14   3   51.79   12.20
   5  14   3  109.49   15.20
   5  14   3   83.29   15.10
   6  14   3    6.30    9.30
   6  14   3    4.50    9.80
   7  14   3    0.10   11.00
   7  14   3   -9.90    9.30
   8  14   3    5.00   12.00
   8  14   3   26.80   12.10
   9  14   3   79.19   17.30
   9  14   3   66.59   16.20
  10  14   3    7.20   14.50
  10  14   3    5.80   14.80
  11  14   3  116.79   23.00
  11  14   3   67.89   20.30
  12  14   3   -3.80   18.40
  12  14   3   25.40   20.40
  13  14   3   32.50   21.30
  13  14   3    8.50   25.50
  13 -15  -3   17.50    8.90
  13 -15  -3  -10.00   12.20
  12 -15  -3   14.90    8.40
  12 -15  -3   21.70   12.60
  11 -15  -3   10.50   10.80
  11 -15  -3   18.70    8.40
  10 -15  -3  165.58   22.30
  10 -15  -3  141.69   18.10
   9 -15  -3   37.60    9.50
   9 -15  -3   44.10   11.20
   8 -15  -3    4.90    7.50
   7 -15  -3   30.70    8.90
   6 -15  -3    8.40    7.80
   5 -15  -3   39.30    9.70
   4 -15  -3   53.19   10.20
   3 -15  -3  168.68   19.20
   2 -15  -3    6.70    7.90
   1 -15  -3   12.00    8.30
   0 -15  -3  375.16   31.10
  -1 -15  -3  124.39   17.40
  -2 -15  -3   66.19    7.10
  -2 -15  -3   43.10   10.50
   3  15   3   -2.90    9.70
   4  15   3   19.30   10.30
   4  15   3   11.80   10.20
   5  15   3  355.16   32.20
   5  15   3  333.57   32.60
   6  15   3   10.10    9.80
   6  15   3   -8.80   10.50
   7  15   3    7.70   11.90
   7  15   3   10.60   10.80
   8  15   3   22.80   12.50
   8  15   3   17.20   14.00
   9  15   3   35.50   15.40
   9  15   3   41.40   16.20
  10  15   3   11.90   16.10
  10  15   3  -12.30   15.70
  11  15   3   11.20   18.80
  11  15   3  -11.60   17.70
  12  15   3   90.99   26.20
  12  15   3   24.70   21.50
  12 -16  -3   23.40   13.50
  12 -16  -3   11.50    9.10
  11 -16  -3   27.40   13.10
  11 -16  -3   33.20   10.00
  10 -16  -3    0.00   11.80
  10 -16  -3   25.70    9.00
   9 -16  -3  261.97   24.10
   9 -16  -3  242.28   27.70
   8 -16  -3  129.29   17.50
   7 -16  -3    5.90    8.00
   6 -16  -3    6.30    8.00
   5 -16  -3   19.60    9.10
   4 -16  -3   43.30   10.60
   3 -16  -3  149.39   19.60
   2 -16  -3  127.49   18.20
   1 -16  -3   28.50    9.50
   0 -16  -3   41.40   10.20
  -1 -16  -3   -7.60    8.80
  -2 -16  -3  146.59   12.40
  -2 -16  -3  136.79   18.30
  -3 -16  -3  524.35   44.20
   3  16   3  596.64   46.90
   4  16   3    8.40   10.90
   5  16   3   50.19   14.20
   5  16   3   47.30   13.70
   6  16   3   44.10   14.40
   6  16   3   42.00   12.90
   7  16   3   56.09   14.60
   7  16   3   74.89   16.80
   8  16   3   38.50   16.30
   8  16   3   33.50   14.00
   9  16   3    2.30   13.80
   9  16   3    3.70   15.80
  10  16   3   25.60   18.00
  10  16   3   37.50   18.40
  11  16   3    2.40   20.40
  11  16   3   -5.10   20.30
  12  16   3   35.00   22.60
  12  16   3   -8.80   22.30
  12 -17  -3    2.80    9.90
  12 -17  -3   13.00   13.90
  11 -17  -3    1.00   12.00
  11 -17  -3   -1.80    9.40
  10 -17  -3    3.90   12.70
  10 -17  -3   17.20    9.60
   9 -17  -3   33.30    9.70
   9 -17  -3   17.70   12.20
   8 -17  -3   -1.90    8.90
   7 -17  -3   34.90   10.30
   6 -17  -3   85.99   13.00
   5 -17  -3  326.57   29.40
   4 -17  -3    7.00    9.80
   3 -17  -3    5.20    8.90
   2 -17  -3   56.49   12.70
   1 -17  -3   31.10   11.00
   0 -17  -3   34.60   11.10
  -1 -17  -3  201.38   23.30
  -2 -17  -3  227.18   24.00
  -3 -17  -3   31.50   11.30
  -4 -17  -3    3.30    9.90
   4  17   3   22.80   13.10
   5  17   3  276.87   32.00
   6  17   3   25.50   14.30
   6  17   3   40.10   14.90
   7  17   3   91.59   18.40
   7  17   3  110.09   20.10
   8  17   3   19.80   14.00
   8  17   3   27.40   16.80
   9  17   3   89.59   22.70
   9  17   3  129.99   22.10
  10  17   3   71.99   23.60
  10  17   3  104.19   23.40
  11  17   3   23.10   22.60
  11  17   3    4.40   21.80
  11 -18  -3  -13.50   12.50
  11 -18  -3   12.20   11.20
  10 -18  -3    5.70   10.90
  10 -18  -3    7.60   13.40
   9 -18  -3    7.70   11.80
   9 -18  -3   10.90   10.00
   8 -18  -3   39.00   11.70
   7 -18  -3   61.29   12.40
   6 -18  -3  187.68   22.60
   5 -18  -3    7.80    9.50
   4 -18  -3   13.10   11.10
   3 -18  -3   18.40   11.50
   2 -18  -3    8.80   10.30
   1 -18  -3   58.59   12.70
   0 -18  -3  182.48   23.20
  -1 -18  -3  627.54   49.80
  -2 -18  -3   -0.20   10.30
  -3 -18  -3    3.90   10.70
  -4 -18  -3  234.08   27.90
   4  18   3  256.47   31.50
  -5 -18  -3    6.10   11.10
   5  18   3   -6.20   13.20
   6  18   3   66.99   17.00
   7  18   3   47.60   17.00
   8  18   3   -1.20   15.60
   9  18   3    9.00   17.60
   9  18   3   36.10   20.10
  10  18   3  -13.00   21.30
  10  18   3    8.00   21.20
  10 -19  -3   27.70   14.00
  10 -19  -3   29.00   12.60
   9 -19  -3   20.30   11.90
   9 -19  -3   19.10   13.20
   8 -19  -3  156.18   19.30
   7 -19  -3   14.70   10.90
   6 -19  -3    2.20   10.70
   5 -19  -3   62.39   13.20
   4 -19  -3   26.60   12.60
   3 -19  -3   11.60   12.80
   2 -19  -3  104.99   16.00
   1 -19  -3  -16.80   10.10
   0 -19  -3   77.89   14.50
  -1 -19  -3   26.10   11.40
  -2 -19  -3    2.40   10.70
  -3 -19  -3   11.00   11.30
  -4 -19  -3  278.47   32.10
   4  19   3  305.27   35.60
  -5 -19  -3   94.59   18.10
   5  19   3  102.79   20.40
  -6 -19  -3   28.00   16.00
   6  19   3   20.50   15.50
  -7 -19  -3    6.70   15.20
   7  19   3    0.80   15.30
   8  19   3  -12.10   17.70
   9  19   3   46.50   22.80
   9 -20  -3   26.20   13.10
   8 -20  -3   20.50   13.20
   7 -20  -3   12.80   13.00
   6 -20  -3    0.60   12.60
   5 -20  -3   39.30   13.80
   4 -20  -3    8.90   12.90
   3 -20  -3    1.00   13.80
   2 -20  -3   16.90   13.80
   1 -20  -3    3.80   13.10
   0 -20  -3   -5.10   10.70
  -1 -20  -3   -4.40   11.90
  -2 -20  -3   54.99   15.20
  -3 -20  -3   68.79   16.30
  -4 -20  -3   -0.70   14.00
  -5 -20  -3   -9.50   14.60
   5  20   3   -4.80   16.40
  -6 -20  -3    1.70   16.30
   6  20   3   28.50   17.50
  -7 -20  -3  144.39   24.70
   7  20   3  167.58   26.50
  -8 -20  -3   -3.10   18.40
   8  20   3   47.60   20.80
   8 -21  -3   -9.40   13.00
   7 -21  -3   26.10   14.00
   6 -21  -3   10.20   14.30
   5 -21  -3   80.59   18.10
   4 -21  -3   32.70   14.90
   3 -21  -3   76.99   18.00
   2 -21  -3   63.69   17.60
   1 -21  -3   20.70   13.70
   0 -21  -3    1.60   12.70
  -1 -21  -3   23.40   14.40
  -2 -21  -3   24.30   13.50
  -3 -21  -3  250.17   32.70
  -4 -21  -3   28.80   14.90
  -5 -21  -3   13.70   17.30
  -6 -21  -3   13.70   17.50
   6  21   3    8.30   17.80
  -7 -21  -3   21.40   19.30
   7  21   3   18.60   22.00
   7 -22  -3   34.50   15.70
   6 -22  -3   26.80   15.70
   5 -22  -3   -6.00   14.60
   4 -22  -3   59.89   18.10
   3 -22  -3   30.90   17.80
   2 -22  -3   16.20   14.80
   1 -22  -3  -19.00   14.50
   0 -22  -3   49.00   16.60
  -1 -22  -3   65.49   18.80
  -2 -22  -3   22.50   17.10
  -3 -22  -3   34.20   16.80
  -4 -22  -3    2.30   17.20
  -5 -22  -3  -29.50   14.50
  -6 -22  -3   -2.20   18.40
   6  22   3    5.50   20.00
   5 -23  -3   -5.90   16.60
   4 -23  -3   32.70   18.30
   3 -23  -3   81.29   20.50
   2 -23  -3   67.09   20.50
   1 -23  -3   38.00   19.50
   0 -23  -3    4.40   17.10
  -1 -23  -3   16.40   17.70
  -2 -23  -3    3.10   18.00
  -3 -23  -3  139.89   25.00
  -4 -23  -3   10.40   18.90
  -2 -21   4   13.90   17.40
  -1 -21   4   24.40   18.00
   0 -21   4   22.50   15.50
   1 -21   4   15.90   15.80
   2 -21   4  228.28   31.40
   3 -21   4   14.20   15.90
   4 -21   4   27.40   15.40
   5 -21   4   82.39   18.20
   6 -21   4   37.40   16.70
   4  20  -4    8.70   20.40
  -4 -20   4    3.80   17.10
   3  20  -4    4.70   19.00
  -3 -20   4   15.80   16.20
  -2 -20   4    1.00   15.40
  -1 -20   4   20.40   15.80
   0 -20   4  156.38   21.60
   1 -20   4   25.90   14.80
   2 -20   4   42.50   15.10
   3 -20   4    4.20   14.10
   4 -20   4   74.49   16.50
   5 -20   4   99.19   18.40
   6 -20   4   17.00   15.00
   7 -20   4   -1.00   13.90
   8 -20   4   32.90   14.70
   6  19  -4   15.00   20.80
  -6 -19   4   10.20   16.60
   5  19  -4  -12.40   17.20
  -5 -19   4   31.00   16.60
   4  19  -4   55.69   20.10
  -4 -19   4   59.49   17.80
   3  19  -4   75.99   21.10
  -3 -19   4   98.19   19.20
   2  19  -4   14.80   17.30
  -2 -19   4   30.90   14.60
  -1 -19   4   48.50   15.40
   0 -19   4   63.89   15.10
   1 -19   4    1.70   11.20
   2 -19   4  109.49   17.90
   3 -19   4   25.10   13.30
   4 -19   4   11.80   11.80
   5 -19   4   72.59   15.90
   6 -19   4    7.00   11.60
   7 -19   4   30.30   13.90
   8 -19   4   56.29   15.00
   9 -19   4  -14.50   12.60
   7  18  -4   19.60   21.90
  -7 -18   4  -24.50   16.00
   6  18  -4   28.10   18.70
  -6 -18   4   13.90   15.80
   5  18  -4   19.20   17.90
  -5 -18   4   -0.90   13.80
   4  18  -4   83.19   21.20
  -4 -18   4   87.19   18.10
   3  18  -4    3.10   14.00
  -3 -18   4   15.40   12.80
   2  18  -4    4.50   15.00
  -2 -18   4   16.40   13.10
  -1 -18   4   68.49   15.40
   0 -18   4   18.60   12.90
   1 -18   4    0.00   11.90
   2 -18   4  204.68   25.10
   3 -18   4   48.80   12.40
   4 -18   4    8.90   11.30
   5 -18   4   20.20   11.70
   6 -18   4    8.60   11.40
   7 -18   4   -5.70   11.30
   8 -18   4    8.50   12.20
   9 -18   4   18.10   12.70
  10 -18   4    1.40   12.00
  11 -18   4   23.50   13.00
   8  17  -4   -2.30   20.20
  -8 -17   4   17.30   16.40
   7  17  -4    4.90   18.80
  -7 -17   4   -8.20   14.10
   6  17  -4    9.80   17.20
  -6 -17   4   -0.90   13.90
   5  17  -4  128.59   21.30
  -5 -17   4  130.29   20.20
   4  17  -4   -0.80   13.40
  -4 -17   4   26.70   13.10
   3  17  -4   14.50   14.70
  -3 -17   4   19.10   12.80
   2  17  -4  265.17   34.60
  -2 -17   4  279.17   29.30
   1  17  -4    9.60   13.90
  -1 -17   4   13.00   11.90
   0 -17   4   27.30   12.70
   1 -17   4  102.19   15.40
   2 -17   4  130.39   18.90
   3 -17   4  297.47   28.70
   4 -17   4   64.09   13.20
   5 -17   4   72.09   14.20
   6 -17   4   72.39   13.90
   7 -17   4    5.40   10.00
   8 -17   4   10.60   11.60
   9 -17   4    3.70   11.00
  10 -17   4    1.60   10.70
  11 -17   4   24.20   12.10
  12 -17   4   -1.30   13.40
   9  16  -4   48.90   25.20
  -9 -16   4   11.20   16.00
   8  16  -4   97.79   22.90
  -8 -16   4   75.99   18.40
   7  16  -4   14.20   16.70
  -7 -16   4   13.60   14.30
   6  16  -4  300.67   37.50
  -6 -16   4  312.87   32.40
   5  16  -4   53.49   16.40
  -5 -16   4   59.19   14.60
   4  16  -4   13.30   14.20
  -4 -16   4    9.00   11.10
   3  16  -4  108.99   19.40
  -3 -16   4   95.79   15.80
   2  16  -4   19.60   13.40
  -2 -16   4   16.60   11.10
   1  16  -4   -5.30   12.40
  -1 -16   4    5.50   10.20
   0 -16   4   11.10    9.40
   1 -16   4   30.50   10.60
   2 -16   4   12.80    8.80
   3 -16   4   77.39   13.60
   4 -16   4  138.19   19.60
   5 -16   4   -9.70    9.10
   6 -16   4   33.60   10.60
   7 -16   4   -4.80    9.80
   8 -16   4   15.10   10.40
   9 -16   4   -6.10    9.50
  10 -16   4    7.30   10.90
  11 -16   4   35.00   11.60
  11 -16   4   22.00   13.10
  12 -16   4   22.60   13.00
  12 -16   4   39.00   11.70
  10  15  -4   -5.60   23.80
 -10 -15   4   24.60   16.40
   9  15  -4   42.10   22.10
  -9 -15   4   34.40   15.40
   8  15  -4   37.70   18.20
  -8 -15   4   53.59   14.80
   7  15  -4    5.30   15.70
  -7 -15   4    3.60   12.40
   6  15  -4   58.79   17.60
  -6 -15   4   82.89   15.40
   5  15  -4   45.90   15.00
  -5 -15   4   29.00   12.30
   4  15  -4   36.00   12.90
  -4 -15   4   41.90   12.80
   3  15  -4   75.09   15.70
  -3 -15   4   80.39   13.20
   2  15  -4   74.29   15.40
  -2 -15   4   69.59   13.20
   1  15  -4   23.10   12.10
  -1 -15   4   28.10   10.40
   0  15  -4   14.10   12.00
   0 -15   4    5.40    9.70
   1 -15   4   55.79   11.60
   2 -15   4  323.17   28.90
   3 -15   4    9.70    8.30
   4 -15   4   14.70    9.10
   5 -15   4   88.79   13.50
   6 -15   4   75.29   12.50
   7 -15   4   13.20    9.20
   8 -15   4  336.97   29.70
   9 -15   4   -0.30    9.40
  10 -15   4   16.30    9.50
  11 -15   4    9.00   10.00
  11 -15   4    6.50   11.60
  12 -15   4   12.30   12.10
  12 -15   4   -1.30    9.40
  13 -15   4   39.30   11.80
  13 -15   4   41.00   14.40
  10  14  -4    9.50   23.70
 -10 -14   4   14.20   14.00
   9  14  -4   28.80   21.50
   8  14  -4   43.00   17.70
  -8 -14   4   18.00   12.30
   7  14  -4  145.39   21.80
  -7 -14   4  121.69   17.80
   6  14  -4   15.10   13.70
  -6 -14   4   22.00   11.40
   5  14  -4   -9.90   10.10
  -5 -14   4    6.00   10.10
   4  14  -4   25.50   11.10
  -4 -14   4   26.10   10.60
   3  14  -4  132.99   19.50
  -3 -14   4  161.18   19.70
   2  14  -4  242.68   27.40
  -2 -14   4  237.68   24.20
   1  14  -4  387.86   36.40
  -1 -14   4  423.36   34.30
   0  14  -4   71.89   14.20
   0 -14   4  129.49   17.10
   1 -14   4   -7.70    7.60
   2 -14   4    4.30    8.00
   3 -14   4  109.09   13.80
   4 -14   4   10.00    8.50
   5 -14   4   22.70    8.10
   6 -14   4   88.89   12.50
   7 -14   4   -4.00    7.70
   8 -14   4  129.09   17.40
   9 -14   4   20.20    9.00
  10 -14   4   13.70    8.70
  11 -14   4   -2.40   10.60
  11 -14   4    7.40    9.00
  12 -14   4   81.39   13.00
  12 -14   4   93.19   15.40
  13 -14   4  114.09   16.90
  13 -14   4  116.69   15.10
  14 -14   4   20.50   11.70
  14 -14   4   49.00   13.40
  11  13  -4   29.70   28.80
 -11 -13   4    1.40   13.70
  10  13  -4  -13.20   18.90
 -10 -13   4    4.30   12.70
   9  13  -4    6.10   19.20
  -9 -13   4   -3.20   11.40
   8  13  -4   12.60   14.60
  -8 -13   4   -9.40   10.60
   7  13  -4   13.50   13.90
  -7 -13   4    0.70   10.30
   6  13  -4    3.00   11.60
  -6 -13   4    2.30    9.60
   5  13  -4  173.48   24.90
  -5 -13   4  196.18   22.20
   4  13  -4  206.78   25.40
  -4 -13   4  222.08   23.00
   3  13  -4  515.95   44.30
  -3 -13   4  544.05   41.70
   2  13  -4    2.20    9.90
  -2 -13   4    5.80    7.90
  -2 -13   4   12.40    5.80
   1  13  -4  181.28   21.70
  -1 -13   4  156.68   19.00
   0  13  -4   21.40   11.00
   0 -13   4   17.50    8.40
   1 -13   4   38.60    8.80
   2 -13   4   20.60    8.30
   3 -13   4  222.78   20.60
   4 -13   4    2.00    7.00
   5 -13   4  293.17   24.80
   6 -13   4   17.90    7.90
   7 -13   4   17.30    7.50
   8 -13   4  119.89   16.40
   9 -13   4   21.00    8.50
  10 -13   4  118.89   16.00
  11 -13   4   -0.40    9.10
  11 -13   4   12.70    8.10
  12 -13   4   93.59   12.40
  12 -13   4   79.89   13.80
  13 -13   4    2.50    8.90
  13 -13   4   14.30   10.70
  14 -13   4    3.90   11.60
  14 -13   4   16.50   10.70
  12  12  -4   68.59   31.40
  11  12  -4   -2.30   22.60
 -11 -12   4   -0.30   12.80
  10  12  -4   15.80   22.20
 -10 -12   4    2.10   11.90
   9  12  -4   39.80   19.40
  -9 -12   4   21.00   11.90
   8  12  -4   48.40   15.90
  -8 -12   4   20.70   11.50
   7  12  -4   16.90    5.30
   7  12  -4    9.90   12.90
  -7 -12   4   36.90   11.20
   6  12  -4   45.10   13.00
  -6 -12   4   49.10   11.40
   5  12  -4   -6.40   10.20
  -5 -12   4   -5.70    8.20
   4  12  -4  203.08   24.20
  -4 -12   4  185.08   20.60
   3  12  -4    9.40    8.80
  -3 -12   4    3.10    7.20
   2  12  -4    8.00    9.00
  -2 -12   4    1.20    5.20
  -2 -12   4    9.90    6.60
   1  12  -4   64.69   12.40
  -1 -12   4   86.19   10.00
  -1 -12   4   87.69   11.60
   0  12  -4   28.30    9.50
   0 -12   4   52.29    9.30
  -1  12  -4   47.30   10.10
   1 -12   4   43.00    9.10
   2 -12   4    2.70    6.50
   3 -12   4  208.38   19.80
   4 -12   4   11.50    7.10
   5 -12   4   76.89   10.50
   6 -12   4  155.88   15.90
   7 -12   4   38.20    8.20
   8 -12   4   71.59   10.50
   9 -12   4  188.78   18.90
  10 -12   4   15.00    9.30
  10 -12   4   27.10    7.80
  11 -12   4   -4.10    6.90
  11 -12   4   10.90    8.50
  12 -12   4   77.49   11.50
  12 -12   4   99.59   13.70
  13 -12   4    2.70    9.80
  13 -12   4    2.50    8.70
  14 -12   4   27.40   10.50
  14 -12   4   35.80   11.70
  15 -12   4    7.50   10.80
  15 -12   4   16.30   12.00
  12  11  -4  -11.30   31.70
 -12 -11   4   24.70   13.60
  11  11  -4  -28.10   23.70
 -11 -11   4   13.90   12.10
  10  11  -4   75.79   24.00
 -10 -11   4   88.99   14.90
   9  11  -4  170.28   26.50
  -9 -11   4  159.38   21.90
   8  11  -4   12.60    8.10
   8  11  -4   11.20   13.50
  -8 -11   4   35.20   10.50
   7  11  -4  148.19   13.40
   7  11  -4  102.79   18.30
  -7 -11   4  116.49   15.30
   6  11  -4  159.18   13.90
   6  11  -4  164.58   22.60
  -6 -11   4  151.48   18.10
   5  11  -4    3.40    9.80
   5  11  -4   -5.30    4.10
  -5 -11   4    0.10    6.90
   4  11  -4  433.76   36.10
   4  11  -4  439.66   29.40
  -4 -11   4  348.87   32.20
   3  11  -4  575.74   46.90
  -3 -11   4  625.74   45.00
   2  11  -4  278.27   28.30
  -2 -11   4  332.97   26.30
  -2 -11   4  317.67   23.40
   1  11  -4  112.19   17.10
  -1 -11   4  117.59   12.40
  -1 -11   4  132.29   14.70
   0  11  -4   68.69   11.90
   0 -11   4   76.69   10.50
  -1  11  -4  671.73   48.10
   1 -11   4  581.64   45.70
   2 -11   4  107.79   13.50
   3 -11   4  440.96   33.60
   4 -11   4   56.59    8.60
   5 -11   4  235.98   20.10
   6 -11   4   21.40    7.10
   7 -11   4   32.90    8.00
   8 -11   4   75.09   10.20
   9 -11   4   20.50    6.80
  10 -11   4   -5.20    6.40
  10 -11   4   -6.50    7.30
  11 -11   4  281.67   25.00
  11 -11   4  328.07   27.30
  12 -11   4   41.60   10.10
  12 -11   4   31.70    8.40
  13 -11   4    6.60    9.00
  13 -11   4    2.90    8.00
  14 -11   4   25.30   10.50
  14 -11   4   13.80    9.00
  15 -11   4   -1.50    9.90
  15 -11   4    0.30   10.20
  13  10  -4   -1.10   34.50
  12  10  -4  -28.70   26.00
 -12 -10   4  -12.80   11.80
  11  10  -4  113.99   28.70
 -11 -10   4   77.79   14.80
  10  10  -4   -6.80   10.70
  10  10  -4   -2.70   19.40
 -10 -10   4   12.70    9.80
   9  10  -4    5.80    9.20
   9  10  -4   -2.90   15.90
  -9 -10   4   -7.20    8.40
   8  10  -4  725.93   60.29
   8  10  -4  733.33   53.09
  -8 -10   4  761.92   55.29
   7  10  -4  145.29   14.30
   7  10  -4  131.29   19.60
  -7 -10   4  140.49   18.40
   6  10  -4   18.10   10.20
   6  10  -4   13.90    5.90
  -6 -10   4   11.30    8.30
   5  10  -4  145.49   12.20
   5  10  -4   93.09   15.20
  -5 -10   4  153.18   16.90
   4  10  -4  292.37   28.70
   4  10  -4  306.97   22.90
  -4 -10   4  328.77   26.20
   3  10  -4  563.94   45.40
   3  10  -4  585.44   41.60
  -3 -10   4  629.74   44.10
   2  10  -4  130.69   16.80
  -2 -10   4  156.38   12.70
  -2 -10   4  147.89   15.10
   1  10  -4   38.50    9.70
  -1 -10   4   44.70    7.90
  -1 -10   4   53.79    7.30
   0  10  -4   69.79   11.80
   0 -10   4   70.99    9.40
  -1  10  -4  473.55   36.10
   1 -10   4  433.46   34.10
   2 -10   4  528.55   39.10
   3 -10   4   15.40    6.20
   4 -10   4  809.82   57.49
   5 -10   4   -1.70    5.10
   6 -10   4   11.20    5.20
   7 -10   4   33.30    7.50
   8 -10   4  171.28   16.40
   9 -10   4   22.40    6.80
  10 -10   4   28.80    7.00
  10 -10   4   27.10    7.90
  11 -10   4    6.50    7.50
  11 -10   4   14.70    6.80
  12 -10   4    3.00    7.60
  12 -10   4    4.40    6.70
  13 -10   4   36.00    9.00
  13 -10   4   46.00    9.90
  14 -10   4   -4.20    8.90
  14 -10   4    2.40    7.90
  15 -10   4   -7.60    8.80
  15 -10   4    0.60    8.70
  13   9  -4   24.50   30.30
  12   9  -4  139.59   33.30
 -12  -9   4  192.98   23.40
  11   9  -4   23.70   15.60
  11   9  -4  -11.80   21.80
 -11  -9   4    1.50    9.40
  10   9  -4   16.20   12.00
  10   9  -4   11.80   18.10
 -10  -9   4   16.20   10.20
   9   9  -4   19.30   15.00
   9   9  -4   41.30   10.80
  -9  -9   4   33.40   10.90
   8   9  -4  188.78   27.50
   8   9  -4  187.18   17.90
  -8  -9   4  154.78   19.70
   7   9  -4   25.60    7.10
   7   9  -4   29.20   12.20
  -7  -9   4    8.90    7.90
   6   9  -4  173.18   15.30
   6   9  -4  171.28   21.70
  -6  -9   4  175.28   18.00
   5   9  -4  147.09   18.80
   5   9  -4  153.08   13.80
  -5  -9   4  174.78   16.70
   4   9  -4    7.50    4.40
   4   9  -4    6.40    7.10
  -4  -9   4    4.50    5.90
   3   9  -4  130.19   16.70
   3   9  -4  112.49   10.70
  -3  -9   4  120.09   13.60
   2   9  -4   22.90    8.30
   2   9  -4   25.70    4.70
  -2  -9   4   29.80    4.90
  -2  -9   4   26.10    6.70
   1   9  -4 1251.37   86.49
  -1  -9   4 1262.77   84.79
  -1  -9   4 1137.49   83.49
   0   9  -4 2054.89  143.39
   0  -9   4 2136.59  142.09
   0  -9   4 2011.50  141.19
  -1   9  -4   12.10    6.50
   1  -9   4    8.60    5.50
   2  -9   4  119.79   12.50
   3  -9   4  782.62   55.49
   4  -9   4   44.80    7.30
   5  -9   4    2.20    5.30
   6  -9   4  963.30   67.59
   7  -9   4   66.69    8.60
   8  -9   4  266.47   21.60
   9  -9   4  180.68   15.60
   9  -9   4  162.48   17.20
  10  -9   4  108.29   12.80
  10  -9   4  117.59   14.90
  11  -9   4   66.19    8.80
  11  -9   4   46.50    8.80
  12  -9   4  257.77   23.80
  12  -9   4  283.27   22.90
  13  -9   4   11.60    7.50
  13  -9   4    9.60    8.00
  14  -9   4   76.49   11.70
  14  -9   4   85.79   12.60
  15  -9   4   -7.60    8.50
  15  -9   4    8.20    8.50
  16  -9   4   -2.30   10.00
  16  -9   4   -3.20    9.10
  13   8  -4  -39.40   26.80
  12   8  -4  -22.40   21.90
  12   8  -4  -13.20   18.90
  11   8  -4    6.90   14.90
  11   8  -4   42.00   21.70
  10   8  -4    4.50   11.50
  10   8  -4   12.10   15.70
   9   8  -4  378.06   30.90
   9   8  -4  337.17   39.20
   8   8  -4    3.90   12.50
   8   8  -4    5.50    7.20
   7   8  -4   39.30    8.10
   7   8  -4   24.20   11.50
  -7  -8   4   29.60    8.10
   6   8  -4  167.48   21.70
   6   8  -4  189.18   15.90
  -6  -8   4  180.28   17.60
   5   8  -4  111.79   11.30
   5   8  -4  107.09   16.20
  -5  -8   4  126.19   13.60
   4   8  -4    1.30    6.40
   4   8  -4    2.30    4.30
  -4  -8   4    4.20    5.20
   3   8  -4  426.16   31.00
   3   8  -4  400.16   34.30
  -3  -8   4  467.55   32.40
   2   8  -4  850.71   59.69
   2   8  -4  853.61   62.59
  -2  -8   4  864.61   60.89
  -2  -8   4  885.11   59.79
   1   8  -4    0.20    5.10
   1   8  -4    0.80    3.20
  -1  -8   4    6.00    4.40
  -1  -8   4    0.60    3.80
   0   8  -4  325.67   26.40
   0  -8   4  328.07   24.70
   0  -8   4  314.17   24.00
  -1   8  -4  226.38   19.30
   1  -8   4  242.18   17.90
   1  -8   4  182.38   16.80
   2  -8   4 1026.50   71.49
   3  -8   4   55.59    7.50
   4  -8   4  941.41   65.79
   5  -8   4    8.30    4.70
   6  -8   4   12.10    5.20
   7  -8   4   12.00    4.90
   8  -8   4  459.25   33.60
   9  -8   4   15.30    5.40
   9  -8   4   25.60    6.30
  10  -8   4   12.20    5.40
  10  -8   4   10.50    6.00
  11  -8   4   82.59   11.90
  11  -8   4   96.09   13.00
  12  -8   4   19.90    6.90
  12  -8   4   25.20    7.50
  13  -8   4   72.49   10.60
  13  -8   4   77.99   11.10
  14  -8   4  313.57   26.00
  14  -8   4  307.57   27.00
  15  -8   4    7.50    9.00
  15  -8   4   -1.00    7.60
  16  -8   4    7.80   10.00
  16  -8   4    6.50    8.60
  14   7  -4  -79.39   29.50
  13   7  -4  -64.49   25.70
  11   7  -4  -33.30   17.50
  10   7  -4   40.80   19.30
   9   7  -4   12.70   14.20
   8   7  -4   86.19   17.40
   8   7  -4  109.49   14.60
   7   7  -4  429.66   37.90
   7   7  -4  467.05   34.00
   6   7  -4   66.99    8.80
   6   7  -4   53.89   10.70
  -6  -7   4   66.59    9.10
   5   7  -4  484.65   35.70
  -5  -7   4  512.15   36.70
   4   7  -4    4.00    6.30
   4   7  -4    8.90    4.10
  -4  -7   4    4.40    4.70
   3   7  -4    5.00    3.80
   3   7  -4    3.00    5.20
  -3  -7   4    5.00    4.50
   2   7  -4  104.49    9.50
   2   7  -4  109.39   13.40
  -2  -7   4   94.39   10.50
   1   7  -4  795.62   57.39
   1   7  -4  847.92   59.69
  -1  -7   4  860.21   58.29
  -1  -7   4  821.32   57.49
   0   7  -4  285.47   20.80
   0   7  -4  276.47   23.00
   0  -7   4  275.47   21.60
   0  -7   4  288.07   21.20
  -1   7  -4  321.37   26.40
   1  -7   4  348.77   25.40
   1  -7   4  359.86   25.80
   2  -7   4  210.88   16.80
   3  -7   4   32.20    5.10
   4  -7   4   12.30    4.40
   5  -7   4  926.11   64.59
   6  -7   4   87.79    9.30
   7  -7   4  136.79   12.80
   8  -7   4  212.38   18.20
   8  -7   4  216.38   17.60
   9  -7   4  102.19   10.60
   9  -7   4   90.99   11.90
  10  -7   4   34.90    7.00
  10  -7   4   46.20    6.70
  11  -7   4    2.30    5.40
  11  -7   4    5.10    5.70
  12  -7   4   41.80    7.70
  12  -7   4   30.60    7.30
  13  -7   4   21.90    7.40
  13  -7   4   24.80    7.10
  14  -7   4   30.10    8.80
  14  -7   4   37.10    8.20
  15  -7   4    3.50    8.60
  15  -7   4    5.90    7.40
  16  -7   4   14.90    9.70
  16  -7   4    2.10    8.30
  14   6  -4  -13.20   29.90
  13   6  -4  -13.20   27.40
  12   6  -4  -48.50   21.40
  11   6  -4   -5.20   19.10
  11   6  -4   37.60   11.10
  10   6  -4   13.40    8.40
  10   6  -4   17.50   17.60
   9   6  -4   25.70   15.10
   9   6  -4   26.20    8.30
   8   6  -4  106.39   17.30
   8   6  -4   99.19   13.70
   7   6  -4  417.36   35.70
   6   6  -4   95.69   13.50
   6   6  -4   98.39   11.40
   5   6  -4   66.49    8.40
   5   6  -4   57.19    9.90
  -5  -6   4   49.00    7.30
   4   6  -4  121.49   13.70
   4   6  -4  106.09   10.50
  -4  -6   4  115.89   11.50
   3   6  -4   19.60    4.40
   3   6  -4   22.60    6.20
  -3  -6   4   21.90    4.60
   2   6  -4  341.47   24.40
   2   6  -4  329.57   26.40
  -2  -6   4  331.57   24.80
   1   6  -4   15.50    5.30
   1   6  -4   26.80    4.50
  -1  -6   4   22.30    4.80
  -1  -6   4   34.40    4.60
   0   6  -4   93.69   11.00
   0   6  -4  100.09    9.10
   0  -6   4   92.99    9.60
   0  -6   4  111.59    9.50
  -1   6  -4   33.40    4.80
  -1   6  -4   24.40    5.50
   1  -6   4   36.40    5.50
   1  -6   4   24.40    4.50
   2  -6   4  216.88   17.60
   2  -6   4  232.08   17.50
   3  -6   4   35.40    5.30
   4  -6   4    2.50    3.30
   5  -6   4  110.19   10.50
   6  -6   4  112.89   10.80
   7  -6   4  562.04   39.90
   8  -6   4  426.76   31.90
   8  -6   4  446.56   31.70
   9  -6   4  253.27   20.90
   9  -6   4  288.07   21.60
  10  -6   4  238.88   18.90
  10  -6   4  221.28   18.50
  11  -6   4  100.79   12.00
  11  -6   4   91.39   11.80
  12  -6   4   16.20    6.40
  12  -6   4   26.20    6.90
  13  -6   4   -4.40    6.20
  13  -6   4    4.90    5.70
  14  -6   4   -7.90    6.40
  14  -6   4    5.40    6.40
  15  -6   4   41.30    9.80
  15  -6   4   49.40    9.00
  16  -6   4    4.90    8.40
  16  -6   4    3.10    8.70
  14   5  -4  -47.10   25.20
  13   5  -4   -2.10   23.70
  12   5  -4  -31.10   20.10
  12   5  -4   35.40   10.40
  11   5  -4  -25.80   18.10
  11   5  -4   35.10    9.20
  10   5  -4    0.20    7.00
  10   5  -4  -11.70   14.90
   9   5  -4  282.87   33.10
   9   5  -4  258.87   22.70
   8   5  -4   25.20    6.70
   8   5  -4   15.80   11.00
   7   5  -4   50.59   11.80
   7   5  -4   61.69    8.30
   6   5  -4   23.60    8.10
  -6  -5   4    2.30    4.10
   5   5  -4  366.66   27.50
   5   5  -4  356.76   29.40
  -5  -5   4  381.76   26.90
   4   5  -4  189.58   17.80
   4   5  -4  187.88   15.40
  -4  -5   4  190.88   15.60
  -4  -5   4  204.68   15.40
   3   5  -4  138.59   13.80
   3   5  -4  139.09   11.70
  -3  -5   4  146.49   11.80
  -3  -5   4  132.79   11.90
   2   5  -4  476.95   33.10
   2   5  -4  455.25   34.40
  -2  -5   4  474.65   33.20
  -2  -5   4  454.85   33.10
   1   5  -4 3483.85  232.28
   1   5  -4 3388.96  231.08
  -1  -5   4 3481.75  231.08
  -1  -5   4 3282.17  231.18
   0   5  -4 1975.00  136.39
   0   5  -4 1967.50  136.59
   0   5  -4 2089.69  137.59
   0  -5   4 2110.39  136.59
   0  -5   4 1883.31  136.49
  -1   5  -4  325.67   27.50
  -1   5  -4  392.76   27.50
  -1   5  -4  386.66   28.40
   1  -5   4  384.86   27.70
   1  -5   4  414.76   27.60
   1  -5   4  401.56   28.40
   2  -5   4  576.54   40.70
   2  -5   4  598.14   41.60
   2  -5   4  565.54   40.90
   3  -5   4   66.19    7.00
   3  -5   4   68.89    9.50
   4  -5   4  305.27   22.50
   5  -5   4   58.89    6.80
   6  -5   4  756.32   52.69
   7  -5   4    3.60    3.20
   7  -5   4   -0.30    3.20
   8  -5   4   87.99    9.50
   8  -5   4   88.49    9.30
   9  -5   4  128.49   11.80
   9  -5   4  119.89   11.90
  10  -5   4    4.80    4.40
  10  -5   4    3.00    4.20
  11  -5   4   18.40    5.70
  11  -5   4   22.40    5.90
  12  -5   4    0.30    5.30
  12  -5   4   -0.50    5.30
  13  -5   4   -0.20    5.40
  13  -5   4   -5.00    5.70
  14  -5   4  103.79   13.10
  14  -5   4   99.19   14.40
  15  -5   4   10.20    7.40
  15  -5   4   17.60    8.20
  16  -5   4    4.50    9.10
  16  -5   4  -12.30    7.80
  17  -5   4    0.80   10.20
  17  -5   4   23.00    9.70
  15   4  -4  -15.60   24.30
  14   4  -4  -37.00   22.80
  13   4  -4   -9.80   21.50
  12   4  -4  -47.00   17.50
  12   4  -4   -3.50    8.60
  11   4  -4   13.80    8.00
  11   4  -4  -28.30   16.10
  10   4  -4  262.07   22.30
  10   4  -4  227.88   32.30
   9   4  -4  146.59   22.20
   9   4  -4  200.18   17.50
   8   4  -4   26.50   12.20
   8   4  -4   21.40    5.90
  -8  -4   4   11.60    3.30
   7   4  -4    0.50    7.50
   7   4  -4    8.50    4.80
  -7  -4   4    7.80    3.40
   6   4  -4  386.06   30.30
   6   4  -4  311.27   25.70
  -6  -4   4  355.16   24.80
   5   4  -4  920.11   68.09
  -5  -4   4  985.20   65.59
   4   4  -4  154.68   14.90
  -4  -4   4  153.28   12.70
  -4  -4   4  155.48   12.20
   3   4  -4  543.15   41.80
   3   4  -4  598.44   40.80
  -3  -4   4  548.05   40.50
  -3  -4   4  627.24   40.50
   2   4  -4 1160.58   87.49
   2   4  -4 1302.57   86.89
  -2  -4   4 1237.98   86.69
  -2  -4   4 1364.16   86.79
   1   4  -4   17.50    3.30
   1   4  -4   14.40    3.50
   1   4  -4   10.10    4.00
  -1  -4   4   14.90    3.50
  -1  -4   4   13.00    3.80
  -1  -4   4   14.50    3.10
   0   4  -4  124.59   10.40
   0   4  -4  118.79   10.10
   0   4  -4  119.19   11.20
   0  -4   4  133.29   11.20
   0  -4   4  128.59   10.30
   0  -4   4  124.99   10.30
  -1   4  -4  234.38   19.00
  -1   4  -4  252.27   18.50
  -1   4  -4  247.08   18.50
   1  -4   4  256.87   18.50
   1  -4   4  271.07   18.80
   1  -4   4  247.38   19.00
  -2   4  -4 1121.69   80.79
  -2   4  -4 1214.28   80.99
   2  -4   4 1162.18   80.99
   2  -4   4 1227.28   81.39
   2  -4   4 1171.78   80.79
  -3   4  -4    4.70    2.70
   3  -4   4   12.40    3.10
   3  -4   4   11.10    3.80
   3  -4   4    9.00    3.60
   4  -4   4  563.64   39.50
   5  -4   4  257.67   19.10
   6  -4   4  328.87   23.90
   7  -4   4   23.30    4.20
   7  -4   4   24.10    4.20
   8  -4   4   61.89    8.00
   8  -4   4   66.19    7.90
   9  -4   4   40.90    5.80
   9  -4   4   32.80    5.60
  10  -4   4   19.80    5.20
  10  -4   4   17.20    5.20
  11  -4   4    2.30    4.50
  11  -4   4    7.10    4.60
  12  -4   4   41.40    6.80
  12  -4   4   35.00    7.20
  13  -4   4    7.50    6.20
  13  -4   4   -2.70    5.40
  14  -4   4   40.00    8.70
  14  -4   4   32.30    7.70
  15  -4   4   23.40    8.40
  15  -4   4   24.20    8.70
  16  -4   4    7.10    9.20
  16  -4   4    8.70    8.00
  17  -4   4   86.09   14.80
  17  -4   4   80.69   12.60
  15   3  -4  -24.60   23.10
  14   3  -4    4.70   20.50
  13   3  -4  -33.20   17.30
  12   3  -4   81.99   11.60
  12   3  -4   89.89   23.10
  11   3  -4   91.49   11.30
  11   3  -4   52.99   19.80
  10   3  -4    4.40    6.40
  10   3  -4  -21.10   13.70
   9   3  -4  179.08   27.10
   9   3  -4  201.38   19.50
  -9  -3   4  266.07   17.40
   8   3  -4   39.10    6.40
   8   3  -4   13.20   10.60
  -8  -3   4   38.70    5.50
   7   3  -4  165.98   14.90
   7   3  -4  138.49   20.80
  -7  -3   4  194.58   13.30
   6   3  -4   25.30    4.70
   6   3  -4   27.10    8.30
  -6  -3   4   26.60    3.50
   5   3  -4   97.99    9.80
   5   3  -4  118.69   13.90
  -5  -3   4  119.69    9.10
   4   3  -4   26.60    5.80
  -4  -3   4   40.30    5.50
  -4  -3   4   36.80    4.70
   3   3  -4 3479.75  245.58
   3   3  -4 3607.44  244.98
  -3  -3   4 3893.71  244.48
  -3  -3   4 3466.05  244.48
   2   3  -4 2754.82  190.58
   2   3  -4 2824.22  190.08
  -2  -3   4 2541.35  189.68
  -2  -3   4 2895.71  190.28
  -2  -3   4 2987.60  189.78
   1   3  -4   37.00    5.10
   1   3  -4   38.00    5.40
   1   3  -4   42.00    4.80
  -1  -3   4   43.10    5.60
  -1  -3   4   34.20    4.70
  -1  -3   4   42.80    5.00
   0   3  -4   44.40    5.10
   0   3  -4   49.20    5.80
   0   3  -4   52.89    6.30
   0  -3   4   54.19    6.10
   0  -3   4   51.09    5.60
   0  -3   4   47.40    5.10
  -1   3  -4   86.59    7.60
  -1   3  -4   89.59    7.90
  -1   3  -4   83.19    7.90
   1  -3   4   92.99    7.60
   1  -3   4   89.69    8.00
   1  -3   4   87.39    8.10
  -2   3  -4  844.42   59.29
  -2   3  -4  911.41   59.39
   2  -3   4  813.82   59.39
   2  -3   4  900.81   59.49
   2  -3   4  833.32   59.09
  -3   3  -4 1057.69   69.69
   3  -3   4  957.80   69.19
   3  -3   4 1018.00   69.79
   4  -3   4  908.01   62.39
   5  -3   4    3.90    2.80
   6  -3   4  150.98   11.50
   6  -3   4  127.89   11.00
   7  -3   4  598.74   43.00
   7  -3   4  633.74   43.20
   8  -3   4  643.34   45.60
   8  -3   4  655.13   45.50
   9  -3   4  122.39   11.30
   9  -3   4  116.39   11.40
  10  -3   4  160.38   13.70
  10  -3   4  143.29   13.90
  11  -3   4  260.07   19.00
  11  -3   4  189.68   18.00
  12  -3   4    1.90    5.50
  12  -3   4    7.90    5.30
  13  -3   4   16.90    6.90
  13  -3   4   11.40    6.00
  14  -3   4    0.80    6.80
  14  -3   4   -2.70    6.90
  15  -3   4   60.49   10.70
  15  -3   4   47.20    9.40
  16  -3   4   -5.80    9.50
  16  -3   4    5.80    8.10
  17  -3   4   21.70   12.00
  17  -3   4   17.40    9.80
  15   2  -4  -40.40   19.30
  14   2  -4   -5.30   19.70
  13   2  -4  -28.90   16.40
  12   2  -4  145.29   24.40
  12   2  -4  129.89   16.90
  11   2  -4   30.90   17.50
  11   2  -4   59.79    9.20
  10   2  -4   -5.90    5.70
 -10  -2   4    2.90    3.80
   9   2  -4   -7.60   10.60
   9   2  -4   18.40    5.60
   8   2  -4  655.53   50.99
  -8  -2   4  793.52   50.09
   7   2  -4    3.30    3.80
   7   2  -4  -17.10    8.00
  -7  -2   4    1.90    2.20
   6   2  -4   62.89    6.90
   6   2  -4   46.90    9.30
  -6  -2   4   64.29    5.60
   5   2  -4  183.78   14.30
   5   2  -4  192.08   18.00
  -5  -2   4  194.68   13.70
   4   2  -4  593.74   43.50
  -4  -2   4  604.24   41.10
   3   2  -4   83.69    9.10
  -3  -2   4   99.79    7.50
  -3  -2   4   90.19    7.50
   2   2  -4  593.24   43.20
   2   2  -4  591.44   43.40
  -2  -2   4  639.74   42.60
  -2  -2   4  639.24   42.60
  -2  -2   4  631.44   43.00
   1   2  -4  935.41   63.69
   1   2  -4  890.21   64.19
   1   2  -4  909.71   64.19
  -1  -2   4  960.40   64.09
  -1  -2   4  968.60   63.69
   0   2  -4 2299.17  150.38
   0   2  -4 2144.09  150.78
   0  -2   4 2090.09  150.28
   0  -2   4 2269.87  150.68
   0  -2   4 2293.87  150.88
  -1   2  -4   14.50    2.50
  -1   2  -4    9.70    2.30
  -1   2  -4   11.30    3.10
   1  -2   4   12.70    2.30
   1  -2   4   14.70    3.20
   1  -2   4   12.20    2.50
  -2   2  -4  309.47   21.90
  -2   2  -4  292.37   22.10
   2  -2   4  307.17   22.30
   2  -2   4  311.17   21.80
   2  -2   4  318.37   22.00
  -3   2  -4 2198.08  151.28
   3  -2   4 2252.07  151.48
  -4   2  -4   17.40    4.00
   4  -2   4   25.90    4.70
   4  -2   4   22.70    3.40
   5  -2   4    7.10    3.20
   5  -2   4    7.20    2.00
   6  -2   4  587.54   41.00
   6  -2   4  582.34   40.60
   7  -2   4   39.20    5.50
   7  -2   4   48.90    6.10
   8  -2   4   44.80    5.90
   8  -2   4   48.90    6.90
   9  -2   4 1854.31  125.99
   9  -2   4 1829.62  126.09
  10  -2   4    4.10    4.60
  10  -2   4    8.10    4.40
  11  -2   4  112.19   12.30
  11  -2   4   99.69   11.90
  12  -2   4  400.16   29.80
  12  -2   4  363.66   28.80
  13  -2   4   13.50    7.30
  13  -2   4   12.30    6.60
  14  -2   4   23.10    7.40
  14  -2   4   12.60    8.20
  15  -2   4   -4.00    7.20
  15  -2   4    1.10    9.00
  16  -2   4   -3.40   10.00
  16  -2   4    6.10    8.30
  17  -2   4   57.79   13.90
  17  -2   4   65.49   12.30
  15   1  -4    2.00   19.20
  14   1  -4  -24.50   17.50
  13   1  -4  -37.90   14.40
  12   1  -4   -7.40    6.90
  12   1  -4   -4.90   13.10
  11   1  -4   24.10   14.60
  11   1  -4    6.90    6.80
  10   1  -4   -0.50    5.50
  10   1  -4  -15.10   12.40
 -10  -1   4    1.80    3.80
   9   1  -4  286.27   32.70
  -9  -1   4  344.97   23.70
   8   1  -4   19.10    4.80
   8   1  -4   -0.20   10.00
  -8  -1   4   37.10    5.00
   7   1  -4 1524.75   98.59
   7   1  -4 1345.07  102.39
   6   1  -4   33.40    4.40
  -6  -1   4   41.10    4.00
   5   1  -4   13.30    5.80
   5   1  -4   15.50    2.80
  -5  -1   4   18.20    2.60
   4   1  -4  349.27   27.40
  -4  -1   4  364.66   24.60
   3   1  -4 1155.28   74.29
  -3  -1   4 1057.29   72.59
  -3  -1   4  942.61   73.09
  -3  -1   4 1128.89   72.59
   2   1  -4    4.10    2.50
  -2  -1   4    1.40    1.30
  -2  -1   4    1.60    1.30
  -2  -1   4    4.20    1.90
   1   1  -4  592.04   41.20
   1   1  -4  596.14   40.40
   1   1  -4  557.74   40.90
  -1  -1   4  606.14   40.40
  -1  -1   4  604.54   40.80
   0   1  -4  305.67   21.00
   0   1  -4  300.07   21.70
   0   1  -4  282.77   21.30
   0  -1   4  296.87   21.20
   0  -1   4  314.77   21.10
   0  -1   4  313.27   21.70
  -1   1  -4  141.29   12.00
  -1   1  -4  161.18   11.40
  -1   1  -4  150.38   11.50
   1  -1   4  158.78   11.40
   1  -1   4  153.58   12.00
   1  -1   4  167.18   11.50
  -2   1  -4  271.27   18.70
  -2   1  -4  249.38   18.90
   2  -1   4  268.97   18.40
   2  -1   4  262.87   18.50
   2  -1   4  245.88   18.80
  -3   1  -4 4096.89  285.77
  -3   1  -4 4157.18  285.97
   3  -1   4 4383.26  286.07
   3  -1   4 4257.97  285.67
  -4   1  -4  411.36   33.10
   4  -1   4  483.95   33.10
   4  -1   4  444.26   32.00
   4  -1   4  525.25   32.80
  -5   1  -4   -0.60    3.30
   5  -1   4   -5.90    2.70
   5  -1   4    6.70    3.10
   5  -1   4    3.00    1.70
   6  -1   4   44.00    5.70
   6  -1   4   49.20    6.00
   7  -1   4  320.07   22.50
   7  -1   4  282.57   22.20
   8  -1   4 3431.76  231.38
   8  -1   4 3383.36  231.48
   9  -1   4   97.39   10.80
   9  -1   4  122.19   11.80
  10  -1   4   95.39   11.20
  10  -1   4   60.79    8.00
  11  -1   4   22.60    6.50
  11  -1   4   22.20    6.30
  12  -1   4   -9.80    6.20
  12  -1   4   -5.80    5.30
  13  -1   4   24.40    7.50
  13  -1   4   10.20    7.80
  14  -1   4   96.89   13.70
  14  -1   4  100.19   12.30
  15  -1   4  -10.20    9.60
  15  -1   4    3.70    7.80
  16  -1   4   -4.70    8.70
  16  -1   4    0.60   10.50
  17  -1   4   11.50   10.40
  17  -1   4   -0.60   12.20
  15   0  -4   -4.40   16.90
  14   0  -4  -29.80   14.60
  13   0  -4  -22.20   13.40
  12   0  -4   29.80   14.60
  12   0  -4   35.20    8.10
  11   0  -4   35.00   13.40
  11   0  -4   37.30    7.50
  10   0  -4   46.50    7.40
  10   0  -4   48.40   12.40
 -10   0   4   55.89    7.80
   9   0  -4  322.77   31.00
  -9   0   4  326.07   23.40
   8   0  -4  362.66   31.90
  -8   0   4  371.36   26.00
   7   0  -4  263.17   26.20
  -7   0   4  296.27   20.30
   6   0  -4    8.90    7.00
   6   0  -4   18.40    3.00
  -6   0   4   21.30    2.60
   5   0  -4   44.30    4.40
   4   0  -4    2.20    4.30
   3   0  -4  760.82   57.39
  -3   0   4  843.42   55.59
  -3   0   4  892.11   55.69
  -3   0   4  782.12   56.69
   2   0  -4    7.20    2.70
  -2   0   4    5.20    1.00
  -2   0   4    3.40    0.90
  -2   0   4    5.80    1.90
   1   0  -4 4267.07  287.17
   1   0  -4 4140.99  286.57
  -1   0   4 4486.85  287.07
  -1   0   4 4097.09  286.67
   0   0  -4    7.00    1.30
   0   0  -4    2.10    2.20
   0   0  -4    5.10    1.40
   0   0   4    6.20    1.20
   0   0   4    5.30    2.20
   0   0   4    4.70    1.40
  -1   0  -4   22.50    3.60
  -1   0  -4   21.80    2.60
  -1   0  -4   24.40    2.90
   1   0   4   22.30    3.30
   1   0   4   22.40    2.30
   1   0   4   18.20    2.70
  -2   0  -4  355.66   24.80
  -2   0  -4  317.07   24.60
   2   0   4  331.07   24.60
   2   0   4  373.46   24.00
   2   0   4  369.46   24.90
  -3   0  -4 1421.26   92.89
   3   0   4 1425.06   92.99
   3   0   4 1360.76   92.99
   3   0   4 1244.58   92.09
  -4   0  -4  100.19    9.30
   4   0   4  115.39    9.30
   4   0   4  107.49    8.10
   4   0   4   99.69    9.00
  -5   0  -4  333.47   22.60
  -5   0  -4  327.67   22.90
   5   0   4  306.37   22.20
   5   0   4  264.87   22.50
   5   0   4  317.87   22.80
  -6   0  -4   29.30    5.20
   6   0   4   48.90    6.30
   6   0   4   45.20    5.80
   7   0   4   32.10    5.50
   7   0   4   33.10    5.20
   8   0   4  305.67   25.30
   8   0   4  374.76   25.90
   9   0   4  188.28   16.00
   9   0   4  155.88   15.20
  10   0   4   90.59   12.10
  10   0   4   68.09    8.90
  11   0   4  117.69   13.50
  11   0   4  102.99   14.80
  12   0   4   95.59   12.80
  12   0   4   90.79   11.20
  13   0   4    4.90    8.90
  13   0   4   16.80    7.80
  14   0   4   15.40    8.20
  14   0   4    9.20   10.00
  15   0   4    6.30   11.00
  15   0   4   14.80    9.00
  16   0   4   11.20   12.30
  16   0   4   -7.00    9.50
  17   0   4   -1.00   13.80
  17   0   4   30.30   10.80
  15  -1  -4  -21.00   15.00
  14  -1  -4   -9.80   13.10
  13  -1  -4  214.98   27.80
  12  -1  -4   70.89    9.20
  12  -1  -4   66.39   13.70
  11  -1  -4   -3.10    5.60
  11  -1  -4    8.90   10.80
  10  -1  -4  107.09   12.70
  10  -1  -4  179.28   20.60
 -10   1   4  137.89   11.90
   9  -1  -4    0.10    4.20
   9  -1  -4   -6.60    8.30
  -9   1   4    7.20    3.60
   8  -1  -4   12.60    4.10
   8  -1  -4   24.60    7.70
  -8   1   4   23.00    3.70
   7  -1  -4  200.98   16.90
  -7   1   4  257.77   16.70
   6  -1  -4  196.58   13.80
  -6   1   4  179.68   13.50
   5  -1  -4   46.90    3.90
   5  -1  -4   38.70    7.00
  -5   1   4   33.70    3.60
   4  -1  -4    1.20    4.10
   3  -1  -4   -2.70    3.00
  -3   1   4    2.60    2.50
   2  -1  -4  302.07   22.10
  -2   1   4  304.47   21.90
   1  -1  -4 2405.16  154.68
   1  -1  -4 2006.50  155.38
  -1   1   4 2458.55  154.78
   0  -1  -4  139.49    9.80
   0  -1  -4  138.79   10.60
   0  -1  -4  121.69    9.70
   0   1   4  139.49    9.70
  -1  -1  -4  510.95   32.90
   1   1   4  547.55   34.00
   1   1   4  402.06   33.40
  -3  -1  -4  973.50   61.59
  -3  -1  -4  946.81   62.19
  -3  -1  -4  903.11   62.39
   3   1   4  766.32   62.19
   3   1   4  840.92   61.59
   3   1   4 1010.40   62.39
  -4  -1  -4  139.69   10.20
   4   1   4  126.39    9.80
   4   1   4  105.89   10.00
   4   1   4  103.99    9.10
  -5  -1  -4    6.30    2.50
  -5  -1  -4   11.70    3.70
   5   1   4    5.40    3.50
   5   1   4   -1.00    3.00
   5   1   4    6.00    2.80
  -6  -1  -4  180.18   14.70
   6   1   4  187.58   15.10
   6   1   4  175.18   14.70
   7   1   4   32.60    5.90
   7   1   4   37.70    6.40
   8   1   4 1502.45   99.39
   8   1   4 1363.06   98.79
   9   1   4  155.08   16.00
   9   1   4  148.19   14.80
  10   1   4   56.79    8.50
  10   1   4   48.10    9.20
  11   1   4  130.39   15.90
  11   1   4  148.99   17.80
  12   1   4   17.60    9.70
  12   1   4   29.40    7.90
  13   1   4    9.70    8.20
  13   1   4   -2.10    9.90
  14   1   4  107.29   16.30
  14   1   4  108.99   13.90
  15   1   4   -0.60    9.20
  15   1   4  -16.00   11.50
  16   1   4   -4.30   13.10
  16   1   4   21.50   10.60
  17   1   4   -2.00   15.80
  17   1   4   47.90   12.10
  15  -2  -4  -12.30   12.40
  14  -2  -4  107.89   16.90
  13  -2  -4    5.40   10.80
  12  -2  -4  -10.90    9.10
  12  -2  -4   -4.50    5.80
  11  -2  -4  130.09   19.20
  11  -2  -4  119.49   13.20
  10  -2  -4    4.40    8.00
  10  -2  -4    8.00    5.00
 -10   2   4   12.50    4.60
   9  -2  -4   62.49    7.20
   9  -2  -4   64.69   10.00
  -9   2   4   63.89    7.80
   8  -2  -4  570.64   37.10
  -8   2   4  484.55   36.60
   7  -2  -4  395.36   26.80
  -7   2   4  362.06   26.50
   6  -2  -4  895.71   62.89
  -6   2   4  947.11   62.79
   5  -2  -4   44.10    4.70
  -5   2   4   61.39    4.70
   4  -2  -4  103.29   10.00
  -4   2   4   81.79    6.30
   3  -2  -4   21.90    4.10
  -3   2   4    9.30    3.80
   2  -2  -4  152.88   10.30
   2  -2  -4  148.09   12.00
   2  -2  -4  144.99   10.30
   1  -2  -4  374.56   25.90
   1  -2  -4  371.26   25.20
  -1   2   4  357.56   25.10
  -1   2   4  366.06   25.90
   0  -2  -4  137.79    9.80
   0  -2  -4  130.69    9.70
   0   2   4  135.19    9.70
   0   2   4  133.69    9.60
  -1  -2  -4   56.09    4.70
  -1  -2  -4   48.70    5.10
   1   2   4   52.39    5.30
   1   2   4   54.89    4.70
  -2  -2  -4  157.58   11.30
  -2  -2  -4  151.88   11.50
  -2  -2  -4  140.69   10.50
   2   2   4  151.38   10.60
   2   2   4  154.08   11.50
   2   2   4  160.68   11.60
  -3  -2  -4 1117.89   71.49
  -3  -2  -4 1117.59   72.19
  -3  -2  -4 1037.80   72.09
   3   2   4 1102.39   72.29
   3   2   4 1003.80   71.59
   3   2   4  953.00   72.39
  -4  -2  -4   87.89    7.40
  -4  -2  -4   79.09    6.60
   4   2   4   79.09    7.40
   4   2   4   85.89    6.90
  -5  -2  -4  110.99    9.30
  -5  -2  -4  111.09    8.90
   5   2   4   87.39   10.10
   5   2   4  123.79    9.70
   5   2   4  118.29    9.50
  -6  -2  -4  722.43   45.60
   6   2   4  617.84   46.10
   6   2   4  623.34   46.40
   6   2   4  645.64   45.80
   7   2   4  239.08   18.80
   7   2   4  205.18   18.20
   8   2   4    0.90    5.60
   8   2   4   12.40    5.80
   9   2   4   31.60    8.40
   9   2   4   49.40    8.70
  10   2   4  156.68   18.90
  10   2   4  177.18   17.00
  11   2   4  -11.00    7.40
  11   2   4    2.80    7.50
  12   2   4  326.87   26.80
  12   2   4  285.57   29.80
  13   2   4  -11.60   10.80
  13   2   4    1.30    8.70
  14   2   4  -22.90   11.70
  14   2   4    2.00    9.00
  15   2   4  218.28   24.10
  15   2   4  205.38   29.50
  16   2   4   -1.30   10.50
  16   2   4  -16.20   14.00
  17   2   4  -26.50   16.20
  17   2   4   -7.60   11.50
  15  -3  -4   44.00   15.00
  14  -3  -4   -6.20   11.30
  13  -3  -4   -1.40   10.30
  12  -3  -4    1.50    5.70
  12  -3  -4    3.00    7.90
  11  -3  -4    7.10    7.70
  11  -3  -4    6.70    5.20
  10  -3  -4   44.40    6.30
  10  -3  -4   42.40    9.10
 -10   3   4   35.30    6.00
   9  -3  -4  225.58   20.10
   9  -3  -4  206.78   16.70
   8  -3  -4  258.07   19.50
   8  -3  -4  280.67   22.50
   7  -3  -4    8.30    5.40
   7  -3  -4    8.30    2.70
  -7   3   4    1.30    2.90
   6  -3  -4  301.07   22.60
   6  -3  -4  302.17   20.30
  -6   3   4  266.97   20.50
   5  -3  -4  356.16   25.80
   5  -3  -4  330.77   23.60
  -5   3   4  344.27   23.90
   4  -3  -4 1378.26   92.99
   4  -3  -4 1326.57   91.39
   3  -3  -4 1801.02  119.09
   3  -3  -4 1678.13  117.89
   3  -3  -4 1755.52  117.99
   2  -3  -4   65.89    5.30
   2  -3  -4   68.09    6.30
   2  -3  -4   60.09    5.20
  -2   3   4   74.69    6.70
   1  -3  -4  455.35   31.00
   1  -3  -4  454.25   31.30
  -1   3   4  443.56   31.00
   0  -3  -4   66.29    5.00
   0   3   4   50.89    4.90
  -1  -3  -4   19.50    3.20
  -1  -3  -4   26.30    3.20
   1   3   4   24.60    3.30
  -2  -3  -4  720.93   49.10
  -2  -3  -4  714.63   49.50
  -2  -3  -4  766.02   49.50
   2   3   4  669.23   49.10
   2   3   4  719.63   49.60
   2   3   4  733.13   49.60
  -3  -3  -4 1165.98   73.69
  -3  -3  -4 1055.59   73.59
  -3  -3  -4 1040.20   73.19
   3   3   4 1056.59   73.49
   3   3   4 1072.39   73.69
   3   3   4 1081.79   74.09
  -4  -3  -4  401.66   26.00
  -4  -3  -4  357.76   25.50
   4   3   4  347.97   25.80
   4   3   4  373.86   26.00
   4   3   4  358.16   26.80
  -5  -3  -4  189.98   13.10
   5   3   4  183.58   13.80
   5   3   4  149.88   14.90
   5   3   4  182.28   13.90
  -6  -3  -4  352.46   25.40
   6   3   4  344.57   25.90
   6   3   4  378.26   26.60
   7   3   4  640.14   53.59
   7   3   4  863.41   53.89
   8   3   4   24.30    6.90
   8   3   4   36.90    7.80
   9   3   4  857.01   53.69
   9   3   4  599.54   53.09
  10   3   4  -15.00    7.70
  10   3   4   -3.30    6.90
  11   3   4   80.19   12.50
  11   3   4   66.29   14.00
  12   3   4    9.00   11.90
  12   3   4   10.10    8.80
  13   3   4   64.99   12.60
  13   3   4   57.89   16.20
  14   3   4   81.19   13.70
  14   3   4   76.29   18.30
  15   3   4   -6.10   10.50
  15   3   4  -37.10   14.00
  16   3   4  -18.40   16.10
  16   3   4  -11.30   10.70
  17   3   4   30.70   13.50
  17   3   4   27.40   19.80
  15  -4  -4    3.70   12.90
  14  -4  -4  -10.00    9.30
  13  -4  -4   88.09   13.50
  12  -4  -4  118.79   17.00
  12  -4  -4  118.99   12.80
  11  -4  -4   62.79   10.30
  11  -4  -4   87.39   10.00
  10  -4  -4    7.50    6.50
  10  -4  -4    4.00    4.00
 -10   4   4   -2.10    5.20
   9  -4  -4  186.88   13.70
   9  -4  -4  195.08   16.70
  -9   4   4  144.89   14.80
   8  -4  -4   13.70    3.10
   8  -4  -4   14.90    5.70
  -8   4   4   10.70    4.30
   7  -4  -4  278.27   20.20
   7  -4  -4  306.07   22.90
  -7   4   4  281.47   20.90
   6  -4  -4    1.20    1.70
   6  -4  -4   -0.50    4.00
  -6   4   4    2.20    2.70
   5  -4  -4    2.60    1.50
   5  -4  -4   -1.30    2.90
  -5   4   4    1.70    2.30
   4  -4  -4  402.56   28.50
   4  -4  -4  396.06   27.20
   4  -4  -4  388.16   27.60
   3  -4  -4   14.70    2.50
   3  -4  -4   14.90    2.20
   3  -4  -4   13.60    3.10
   2  -4  -4  696.03   51.59
   2  -4  -4  808.92   51.39
   2  -4  -4  746.03   51.29
   1  -4  -4   92.19    7.40
  -1   4   4   90.49    7.30
   0  -4  -4 1311.07   86.19
   0   4   4 1220.08   86.09
  -1  -4  -4 5196.58  314.57
  -1  -4  -4 4653.43  314.37
  -1  -4  -4 4544.05  314.37
   1   4   4 4207.88  314.27
  -2  -4  -4   36.30    4.20
  -2  -4  -4   34.90    4.10
  -2  -4  -4   34.30    4.20
   2   4   4   35.70    4.40
   2   4   4   38.50    4.80
   2   4   4   42.10    4.30
  -3  -4  -4  603.04   41.60
  -3  -4  -4  624.34   41.50
  -3  -4  -4  566.34   41.30
   3   4   4  623.24   41.50
   3   4   4  574.34   41.70
   3   4   4  613.84   42.10
  -4  -4  -4  520.95   35.60
  -4  -4  -4  501.65   35.30
   4   4   4  490.75   35.70
   4   4   4  499.65   35.50
   4   4   4  539.95   36.60
  -5  -4  -4  184.28   13.20
   5   4   4  177.28   15.20
   5   4   4  176.78   13.60
   5   4   4  169.78   14.10
  -6  -4  -4 1413.16   91.59
   6   4   4 1373.86   92.59
   6   4   4 1426.56   91.99
   6   4   4 1144.39   92.99
   7   4   4  769.52   57.09
   7   4   4  877.21   58.39
   8   4   4   53.79    8.40
   8   4   4   26.20    8.00
   9   4   4   98.69   13.00
   9   4   4  113.09   13.80
  10   4   4  207.38   25.60
  10   4   4  315.87   25.60
  11   4   4  -14.00    8.70
  11   4   4   -4.10    8.80
  12   4   4   56.39   12.30
  12   4   4   39.50   14.70
  13   4   4   -0.50   10.30
  13   4   4  -16.60   12.70
  14   4   4    2.40   14.60
  14   4   4   18.60   11.60
  15   4   4    4.70   11.90
  15   4   4    9.90   17.00
  16   4   4  -12.00   17.80
  16   4   4   25.00   12.80
  17   4   4   -6.30   20.30
  17   4   4   -8.50   13.00
  15  -5  -4    2.30   11.70
  14  -5  -4   -1.40    9.20
  13  -5  -4   21.20    8.90
  12  -5  -4    7.50    7.60
  12  -5  -4    5.70    5.10
  11  -5  -4   67.29   10.20
  11  -5  -4   76.59    9.10
  10  -5  -4    8.90    6.10
  10  -5  -4   16.50    3.90
 -10   5   4   -4.00    5.40
   9  -5  -4  328.77   25.00
   9  -5  -4  322.87   22.10
  -9   5   4  271.57   23.50
   8  -5  -4  284.57   22.50
   8  -5  -4  277.87   20.00
  -8   5   4  277.17   21.40
   7  -5  -4    7.70    2.40
   7  -5  -4    4.30    4.50
  -7   5   4    6.50    3.80
   6  -5  -4  511.75   37.40
   6  -5  -4  519.55   35.70
  -6   5   4  527.35   36.50
   5  -5  -4  341.97   25.50
   5  -5  -4  360.06   24.30
  -5   5   4  340.47   24.90
   4  -5  -4   95.29    8.20
   4  -5  -4   91.19    7.60
   4  -5  -4   94.59    8.70
   3  -5  -4   51.59    5.20
   3  -5  -4   57.69    6.10
   3  -5  -4   45.50    5.40
   2  -5  -4  861.61   59.19
   2  -5  -4  863.91   59.19
   1  -5  -4 1174.78   77.79
  -1   5   4 1101.89   77.69
   0  -5  -4 5570.34  367.86
   0   5   4 5314.17  367.86
  -1  -5  -4 3667.63  231.28
  -1  -5  -4 3396.16  230.88
   1   5   4 3163.98  230.88
  -2  -5  -4   57.89    5.30
  -2  -5  -4   47.10    5.00
  -2  -5  -4   53.79    5.60
   2   5   4   46.60    5.70
   2   5   4   49.70    5.60
  -3  -5  -4  268.37   20.10
  -3  -5  -4  292.57   20.30
  -3  -5  -4  270.27   19.60
   3   5   4  284.87   19.70
   3   5   4  277.57   20.50
   3   5   4  272.37   20.70
  -4  -5  -4  114.19    9.10
   4   5   4  106.29    8.70
   4   5   4   97.19    9.70
   4   5   4  105.49   10.10
  -5  -5  -4 1206.98   81.09
   5   5   4 1204.58   82.39
   5   5   4 1136.49   81.69
   5   5   4 1187.58   80.89
   6   5   4 1689.53  114.69
   6   5   4 1689.43  115.59
   6   5   4 1666.23  116.39
   7   5   4  105.09   13.90
   7   5   4  124.29   11.30
   7   5   4  154.28   13.70
   8   5   4    6.60    5.70
   8   5   4   -7.20    3.70
   8   5   4    2.30    6.80
   9   5   4   15.90    8.60
   9   5   4   31.90    8.40
  10   5   4    1.70    9.10
  10   5   4   -8.50    8.60
  11   5   4   48.40   13.00
  12   5   4   27.80   14.50
  12   5   4   64.69   13.40
  13   5   4  151.28   18.70
  13   5   4  102.19   20.20
  14   5   4  -23.90   15.70
  14   5   4   22.70   12.60
  15   5   4  -14.30   12.00
  15   5   4  -27.00   17.20
  16   5   4   25.10   20.90
  16   5   4   30.60   13.50
  15  -6  -4    0.10   10.20
  14  -6  -4   24.00   10.40
  13  -6  -4    4.40    6.30
  13  -6  -4    0.60    8.60
  12  -6  -4   53.49    6.70
  12  -6  -4   39.40    8.80
  11  -6  -4    2.20    3.80
  11  -6  -4    5.90    6.60
  10  -6  -4   15.30    3.70
  10  -6  -4    9.40    6.10
   9  -6  -4   20.90    6.50
   9  -6  -4   29.50    4.30
   8  -6  -4   42.00    5.40
   8  -6  -4   35.00    6.70
  -8   6   4   30.60    6.90
   7  -6  -4   17.20    5.30
   7  -6  -4   23.40    3.20
  -7   6   4   18.50    4.90
   6  -6  -4    0.00    3.60
   6  -6  -4    2.20    2.20
  -6   6   4    5.30    3.90
   5  -6  -4    3.30    3.40
   5  -6  -4    6.00    2.40
   4  -6  -4  160.48   13.30
   4  -6  -4  174.28   12.60
   4  -6  -4  157.18   13.00
   3  -6  -4  211.58   15.30
   3  -6  -4  187.88   15.50
   3  -6  -4  203.98   15.00
   2  -6  -4  120.19   10.00
   2  -6  -4  118.09    9.90
   1  -6  -4   98.69    8.80
  -1   6   4  105.19    8.80
   0  -6  -4  148.69   11.70
   0   6   4  141.19   11.60
  -1  -6  -4  323.97   22.10
  -1  -6  -4  285.57   21.40
   1   6   4  278.47   21.50
  -2  -6  -4  307.47   22.20
  -2  -6  -4  299.97   22.30
  -2  -6  -4  313.97   21.60
   2   6   4  299.47   22.50
   2   6   4  304.77   22.50
  -3  -6  -4  175.58   13.40
  -3  -6  -4  169.48   12.20
   3   6   4  157.78   13.80
   3   6   4  161.88   13.70
  -4  -6  -4  412.26   28.30
   4   6   4  381.36   28.80
   4   6   4  377.76   28.70
   4   6   4  391.06   27.30
   5   6   4  246.48   19.70
   5   6   4  250.77   20.00
   5   6   4  246.38   18.00
   6   6   4   42.10    5.20
   6   6   4   34.90    6.30
   6   6   4   32.80    6.90
   7   6   4  145.49   16.40
   7   6   4  168.18   16.00
   7   6   4  173.78   13.50
   8   6   4  235.18   23.60
   8   6   4  278.27   20.40
   9   6   4  247.98   21.40
   9   6   4  160.88   21.10
  10   6   4    0.00    8.90
  10   6   4   13.50    9.30
  11   6   4   -8.90    9.10
  11   6   4   -6.30   10.50
  12   6   4  113.19   16.80
  12   6   4   62.69   16.50
  13   6   4  -25.90   13.80
  13   6   4    9.20   12.50
  14   6   4  182.48   22.30
  15   6   4  -29.80   19.50
  15   6   4  -15.70   13.10
  16   6   4   -9.20   12.80
  16   6   4  -48.10   20.90
  15  -7  -4   38.60   11.60
  14  -7  -4   42.90   11.00
  13  -7  -4    2.70    8.20
  13  -7  -4   12.40    5.50
  12  -7  -4   34.10    5.60
  12  -7  -4   33.90    8.40
  11  -7  -4   23.60    7.20
  11  -7  -4   23.00    4.70
  10  -7  -4  295.27   21.00
  10  -7  -4  266.47   23.70
   9  -7  -4    7.40    5.40
   9  -7  -4    4.70    3.30
   8  -7  -4    2.10    5.10
   8  -7  -4    1.90    2.80
   7  -7  -4   13.40    3.40
   7  -7  -4   17.80    5.20
   6  -7  -4   24.80    5.30
   6  -7  -4   36.10    4.50
  -6   7   4   35.70    6.20
   5  -7  -4    3.70    2.90
   5  -7  -4   -6.20    3.00
   5  -7  -4   -1.60    3.50
   4  -7  -4 2071.79  137.09
   4  -7  -4 2000.70  137.69
   4  -7  -4 1970.30  137.39
   3  -7  -4  543.25   38.00
   3  -7  -4  539.55   38.30
   2  -7  -4   36.60    5.20
   2  -7  -4   39.50    5.40
   1  -7  -4  222.88   16.50
  -1   7   4  203.18   16.30
   0  -7  -4  235.18   17.60
   0   7   4  221.78   17.30
  -1  -7  -4  766.32   62.89
  -1  -7  -4 1034.00   63.99
   1   7   4  947.61   63.39
  -2  -7  -4  258.27   19.80
  -2  -7  -4  269.87   18.40
   2   7   4  259.97   19.70
   2   7   4  239.68   19.80
  -3  -7  -4 1000.20   71.29
  -3  -7  -4 1043.70   70.09
   3   7   4 1023.40   71.69
   3   7   4 1050.29   71.69
  -4  -7  -4    8.10    3.30
   4   7   4   14.20    5.00
   4   7   4   15.40    4.50
   5   7   4  689.13   51.89
   5   7   4  742.73   52.29
   5   7   4  753.42   50.09
   6   7   4  129.79   12.90
   6   7   4  110.99   12.80
   6   7   4  111.19    9.80
   7   7   4  510.15   36.00
   7   7   4  506.85   39.20
   7   7   4  515.95   38.40
   8   7   4   12.60    4.80
   8   7   4   14.80    7.70
   8   7   4   13.70    6.70
   9   7   4   19.50   10.60
   9   7   4   55.69    7.90
   9   7   4   70.89   12.00
  10   7   4   30.20   10.40
  10   7   4    9.30    9.50
  11   7   4   94.39   16.50
  11   7   4  139.49   19.00
  12   7   4   16.70   14.50
  12   7   4   18.30   12.90
  13   7   4    9.50   16.70
  13   7   4   20.60   13.80
  14   7   4   55.59   22.90
  14   7   4  121.39   18.90
  15   7   4   -6.10   13.70
  15   7   4   -7.80   20.70
  16   7   4  -16.00   24.20
  16   7   4   24.20   16.00
  15  -8  -4    5.90   11.10
  14  -8  -4   26.30   10.00
  13  -8  -4  175.08   19.90
  13  -8  -4  159.78   15.10
  12  -8  -4   13.20    7.50
  12  -8  -4    7.90    4.60
  11  -8  -4   32.10    8.10
  11  -8  -4   43.80    5.80
  10  -8  -4   10.70    6.80
  10  -8  -4   11.40    4.10
   9  -8  -4    7.10    3.70
   9  -8  -4    9.60    5.90
   8  -8  -4  229.28   20.20
   8  -8  -4  246.48   18.10
   7  -8  -4  409.96   29.00
   7  -8  -4  401.76   30.60
   6  -8  -4  422.66   30.10
   6  -8  -4  418.86   31.40
   5  -8  -4  363.66   28.40
   5  -8  -4  402.86   27.80
   4  -8  -4   12.20    3.80
   3  -8  -4   10.60    3.80
   2  -8  -4  286.07   21.60
  -1   8   4   84.69    8.80
   0   8   4    2.20    3.30
   2   8   4  269.47   22.00
   2   8   4  291.97   21.80
  -3  -8  -4  142.09   11.10
   3   8   4  169.58   14.20
   3   8   4  160.08   14.20
   4   8   4  342.37   26.40
   4   8   4  345.27   26.60
   5   8   4   18.10    6.20
   5   8   4   16.80    5.60
   6   8   4  562.84   41.50
   6   8   4  552.14   41.00
   6   8   4  548.15   38.20
   7   8   4  112.79   14.60
   7   8   4   94.29    9.20
   7   8   4   99.79   13.60
   8   8   4    1.70    6.50
   8   8   4    2.70    7.80
   8   8   4   10.00    4.80
   9   8   4   89.79   15.00
   9   8   4  114.89   12.20
   9   8   4  148.59   18.30
  10   8   4   57.69   12.20
  10   8   4   45.30   12.40
  11   8   4   -7.10   11.30
  11   8   4   13.00   12.20
  12   8   4   86.99   19.00
  12   8   4   75.39   16.90
  13   8   4  219.18   28.20
  13   8   4  123.39   24.60
  14   8   4  183.38   22.80
  14   8   4   53.49   24.50
  15   8   4   25.50   16.50
  15   8   4  -36.90   22.70
  16   8   4   -8.90   26.40
  16   8   4   35.10   17.20
  15  -9  -4   29.40   12.10
  14  -9  -4   21.40   10.30
  13  -9  -4   20.60    5.90
  13  -9  -4   19.40    9.50
  12  -9  -4   75.09    9.60
  12  -9  -4   55.19   10.90
  11  -9  -4    9.40    7.00
  11  -9  -4   22.80    5.40
  10  -9  -4   -1.70    4.00
  10  -9  -4    2.70    5.90
   9  -9  -4    4.40    3.90
   9  -9  -4   -1.40    6.10
   8  -9  -4    5.70    3.90
   8  -9  -4    2.90    5.40
   7  -9  -4  317.17   23.40
   7  -9  -4  310.17   25.10
   6  -9  -4   27.10    6.30
   6  -9  -4   35.40    5.40
   5  -9  -4  602.54   42.00
   5  -9  -4  583.64   43.00
   4  -9  -4   13.30    4.30
   3  -9  -4  387.56   28.50
   2  -9  -4  609.14   43.40
   0   9   4  508.85   36.70
   1   9   4  273.77   21.50
   2   9   4  186.28   16.30
   2   9   4  172.78   15.60
  -3  -9  -4    0.80    2.00
   3   9   4    4.60    4.80
   3   9   4    0.30    4.50
   4   9   4  412.46   30.90
   4   9   4  388.76   30.40
   5   9   4  976.20   71.99
   5   9   4 1058.89   72.29
   6   9   4  154.38   15.90
   6   9   4  146.09   16.20
   7   9   4  386.56   30.60
   7   9   4  328.27   29.10
   7   9   4  360.26   25.10
   8   9   4   29.60    5.10
   8   9   4   20.90    8.90
   8   9   4    7.00    8.80
   9   9   4    8.50    8.80
   9   9   4    2.70    5.10
   9   9   4   16.30    9.70
  10   9   4  132.29   19.50
  10   9   4  148.09   14.80
  11   9   4   12.60   13.30
  11   9   4   59.29   14.80
  12   9   4  209.78   27.00
  12   9   4  266.17   33.70
  13   9   4  105.49   24.20
  13   9   4  102.49   20.00
  14   9   4    3.40   22.50
  14   9   4  -27.90   14.10
  15   9   4  -26.30   24.90
  15   9   4   61.89   18.40
  14 -10  -4    0.50   10.10
  13 -10  -4    9.70    6.20
  13 -10  -4   10.60    9.50
  12 -10  -4  119.79   17.40
  12 -10  -4  111.89   13.40
  11 -10  -4   50.69    9.70
  10 -10  -4    1.60    6.20
  10 -10  -4    2.90    4.40
   9 -10  -4  109.79   11.30
   9 -10  -4  113.19   14.80
   8 -10  -4    8.30    6.30
   8 -10  -4    1.10    4.50
   7 -10  -4   19.30    6.80
   7 -10  -4   20.70    5.10
   6 -10  -4   -1.50    4.50
   6 -10  -4   -0.60    4.20
   5 -10  -4   50.79    6.90
   4 -10  -4  101.69   10.80
   3 -10  -4  883.51   61.99
   2 -10  -4    6.90    4.70
   1 -10  -4  286.17   22.70
   0  10   4  825.52   58.29
   1  10   4   44.90    7.10
   2  10   4  659.33   48.70
   2  10   4  682.83   48.30
  -3 -10  -4 1299.77   88.99
   3  10   4 1303.57   91.99
   3  10   4 1335.17   91.59
   4  10   4 2076.89  141.59
   4  10   4 2027.30  141.89
   5  10   4   64.69   10.10
   5  10   4   60.29    9.40
   6  10   4   14.60    8.10
   6  10   4   10.30    6.80
   7  10   4   34.10    9.10
   7  10   4   16.80    8.90
   8  10   4   51.39   11.60
   8  10   4   45.40    9.90
   9  10   4   73.09   14.80
   9  10   4   93.19    9.10
   9  10   4   60.29   12.50
  10  10   4   13.00   10.90
  10  10   4   -5.20    5.90
  10  10   4   -4.20   11.20
  11  10   4    5.70   12.50
  11  10   4  -12.00   12.70
  12  10   4  145.99   23.30
  12  10   4   92.09   19.60
  13  10   4    2.00   16.20
  13  10   4   -2.40   18.60
  14  10   4    5.30   17.50
  14  10   4   13.80   23.70
  15  10   4  -39.20   25.00
  15  10   4    7.40   18.00
  14 -11  -4    9.00   11.00
  13 -11  -4   32.40   10.90
  13 -11  -4   48.40    7.90
  12 -11  -4   72.89   13.30
  12 -11  -4  103.19   12.10
  11 -11  -4   25.10    6.20
  11 -11  -4   18.10    9.10
  10 -11  -4   47.40    9.90
  10 -11  -4   56.09    7.70
   9 -11  -4   23.40    6.00
   9 -11  -4   17.10    8.00
   8 -11  -4   68.89   10.30
   8 -11  -4   63.89    8.10
   7 -11  -4   11.80    7.50
   7 -11  -4   23.20    5.60
   6 -11  -4   53.19    8.80
   6 -11  -4   83.09   10.10
   5 -11  -4  271.87   21.70
   4 -11  -4  393.76   29.80
   3 -11  -4  390.66   29.60
   2 -11  -4  362.26   28.00
   1 -11  -4   39.20    7.60
   0  11   4   87.49   10.60
   1  11   4  153.38   15.10
   2  11   4  115.59   12.70
   2  11   4  126.39   14.70
  -3 -11  -4  838.42   56.89
   3  11   4  810.22   60.49
   3  11   4  859.91   59.99
   4  11   4  337.77   28.30
   4  11   4  340.47   27.80
   5  11   4  502.85   40.40
   5  11   4  551.24   40.80
   6  11   4   20.00    8.70
   6  11   4   25.60    8.90
   7  11   4   29.50    9.70
   7  11   4   31.00    8.90
   8  11   4    5.50   10.10
   8  11   4   13.90    8.90
   9  11   4  110.19   16.70
   9  11   4  132.39   18.60
  10  11   4   63.89   16.00
  10  11   4   88.49   15.60
  11  11   4   19.60   14.90
  11  11   4   15.30   13.70
  12  11   4   10.40   15.60
  12  11   4   15.10   15.80
  13  11   4   31.60   20.70
  13  11   4   29.60   18.70
  14  11   4    9.90   23.20
  14  11   4  -29.60   17.30
  15  11   4   -1.70   28.40
  15  11   4    9.40   19.70
  14 -12  -4   44.10   12.80
  13 -12  -4   12.20   11.00
  13 -12  -4   37.30    8.30
  12 -12  -4    9.70   10.20
  12 -12  -4   12.50    7.00
  11 -12  -4   39.90   10.90
  11 -12  -4   45.80    7.60
  10 -12  -4   30.90    6.60
  10 -12  -4   22.70    8.70
   9 -12  -4    7.00    5.80
   9 -12  -4    6.90    7.80
   8 -12  -4    3.40    6.70
   8 -12  -4    8.30    5.90
   7 -12  -4    7.80    7.20
   7 -12  -4    7.70    6.00
   6 -12  -4    1.40    5.30
   5 -12  -4    8.40    5.40
   4 -12  -4   13.70    6.30
   3 -12  -4   49.10    8.10
   2 -12  -4  345.37   27.50
   1 -12  -4    7.60    5.70
   1  12   4  284.87   24.00
   2  12   4  633.74   46.00
   2  12   4  616.14   46.80
  -3 -12  -4    4.10    2.20
   3  12   4    6.30    6.50
   3  12   4    3.90    6.70
   4  12   4   43.70    9.00
   4  12   4   46.70    9.90
   5  12   4   90.89   12.50
   5  12   4   90.39   12.90
   6  12   4   50.99   10.70
   6  12   4   67.39   12.20
   7  12   4  307.07   29.70
   7  12   4  344.67   30.70
   8  12   4    8.90    9.60
   8  12   4   29.40   11.40
   9  12   4  283.17   30.70
   9  12   4  298.27   30.20
  10  12   4   -0.50   13.00
  10  12   4   -6.70   11.70
  11  12   4   73.59   18.30
  11  12   4  108.49   19.90
  12  12   4  136.99   25.30
  12  12   4  249.48   34.40
  13  12   4   18.60   20.60
  13  12   4   -9.00   17.00
  14  12   4    0.40   20.00
  14  12   4   29.50   23.40
  13 -13  -4    7.30    7.90
  13 -13  -4   -2.90   10.50
  12 -13  -4   44.50    8.50
  12 -13  -4   31.30   11.20
  11 -13  -4   10.10    9.50
  11 -13  -4   13.80    7.00
  10 -13  -4   -0.20    8.90
  10 -13  -4    5.30    6.60
   9 -13  -4   -1.30    6.10
   9 -13  -4   16.30    8.60
   8 -13  -4   37.10    9.60
   8 -13  -4   51.09    8.00
   7 -13  -4    5.10    5.80
   7 -13  -4   -7.20    7.40
   6 -13  -4  102.19   13.20
   5 -13  -4  190.18   18.00
   4 -13  -4   -1.60    6.70
   3 -13  -4  139.49   15.80
   2 -13  -4  439.96   34.20
   1 -13  -4  771.72   56.09
   0 -13  -4   35.40    8.10
   1  13   4  417.06   32.40
   2  13   4   -3.80    5.80
   3  13   4  426.86   35.00
   3  13   4  484.55   37.20
   4  13   4  190.78   21.30
   4  13   4  202.08   20.30
   5  13   4   13.80    8.90
   5  13   4    7.90    8.20
   6  13   4   -7.10    7.70
   6  13   4    6.60    9.10
   7  13   4    6.80    8.90
   7  13   4    1.40    9.10
   8  13   4  219.88   26.40
   8  13   4  213.48   25.80
   9  13   4   44.40   13.30
   9  13   4   47.60   14.50
  10  13   4  204.38   27.40
  10  13   4  138.09   22.30
  11  13   4    3.10   15.60
  11  13   4   -0.20   14.50
  12  13   4   31.80   18.50
  12  13   4   18.10   18.50
  13  13   4   16.00   23.10
  13  13   4  -13.10   18.70
  14  13   4   98.49   26.80
  14  13   4  129.19   31.60
  13 -14  -4   -4.40   12.10
  13 -14  -4   11.70    8.70
  12 -14  -4    7.10   11.70
  12 -14  -4    6.00    7.50
  11 -14  -4   34.90    8.60
  11 -14  -4   31.20   12.10
  10 -14  -4  259.87   25.30
  10 -14  -4  253.77   22.70
   9 -14  -4    0.80    8.40
   9 -14  -4    0.60    6.90
   8 -14  -4  156.78   16.80
   8 -14  -4  147.29   19.40
   7 -14  -4   15.70    7.30
   6 -14  -4    0.20    6.40
   5 -14  -4   11.20    6.70
   4 -14  -4   50.39    9.10
   3 -14  -4  108.39   14.40
   2 -14  -4   37.00    8.80
   1 -14  -4   20.40    7.50
   0 -14  -4   15.60    7.30
   2  14   4  328.77   27.70
   3  14   4  136.99   18.60
   3  14   4  123.29   16.10
   4  14   4   52.89   11.30
   4  14   4   76.69   12.20
   5  14   4   50.79   11.60
   5  14   4   50.29   11.50
   6  14   4   16.50   10.00
   6  14   4   21.10   11.00
   7  14   4   20.40   11.20
   7  14   4   15.80   10.80
   8  14   4   27.40   11.80
   8  14   4   46.30   14.30
   9  14   4  172.08   23.80
   9  14   4  201.48   26.90
  10  14   4   -3.60   15.50
  10  14   4    1.00   13.10
  11  14   4   10.60   16.60
  11  14   4   17.30   17.50
  12  14   4   64.49   22.60
  12  14   4   -8.50   19.10
  13  14   4  -31.50   21.50
  13  14   4   -6.60   23.00
  13 -15  -4    0.40   12.70
  13 -15  -4    2.80    8.70
  12 -15  -4   37.40   13.70
  12 -15  -4   23.50    8.80
  11 -15  -4   23.30    8.80
  11 -15  -4   26.20   12.60
  10 -15  -4   35.50   11.00
  10 -15  -4   35.40    9.10
   9 -15  -4   24.00   10.50
   9 -15  -4   28.10    9.00
   8 -15  -4  138.29   16.80
   8 -15  -4  120.09   18.00
   7 -15  -4  294.97   25.70
   6 -15  -4    0.70    7.30
   5 -15  -4   13.30    7.70
   4 -15  -4   48.60   10.10
   3 -15  -4   25.00    9.00
   2 -15  -4  157.98   18.90
   1 -15  -4  414.86   33.40
   0 -15  -4   74.19   12.60
  -1 -15  -4  171.38   20.10
   3  15   4   14.00   10.00
   3  15   4    0.90    7.70
   4  15   4   -5.20    9.20
   4  15   4   -3.30    8.70
   5  15   4  285.87   30.00
   5  15   4  290.67   28.80
   6  15   4   45.80   12.80
   6  15   4   61.99   13.90
   7  15   4  138.49   19.90
   7  15   4  117.29   17.70
   8  15   4  658.03   55.39
   8  15   4  710.73   56.09
   9  15   4   23.40   15.10
   9  15   4    6.40   13.40
  10  15   4   31.30   17.60
  10  15   4   41.00   16.70
  11  15   4   56.79   20.10
  11  15   4   16.80   18.90
  12  15   4   -0.30   20.40
  12  15   4  -17.20   19.30
  13  15   4   13.20   23.60
  13  15   4   12.80   22.80
  12 -16  -4   42.60   10.10
  12 -16  -4   42.60   13.90
  11 -16  -4   18.70    9.10
  11 -16  -4   18.40   12.30
  10 -16  -4   22.80   12.40
  10 -16  -4   16.60    8.80
   9 -16  -4   12.80    8.70
   9 -16  -4   -4.80   10.70
   8 -16  -4  243.98   23.20
   8 -16  -4  242.68   26.40
   7 -16  -4   71.69   11.40
   6 -16  -4   26.70    9.10
   5 -16  -4  218.78   22.20
   4 -16  -4   11.60    8.70
   3 -16  -4  294.17   27.20
   2 -16  -4   40.40   10.10
   1 -16  -4  116.39   16.50
   0 -16  -4  304.47   27.90
  -1 -16  -4  477.95   38.80
  -2 -16  -4  618.54   48.10
   4  16   4   19.70   11.00
   4  16   4    9.20   10.30
   5  16   4   50.39   13.70
   5  16   4   36.50   12.40
   6  16   4  255.97   29.90
   6  16   4  276.57   29.60
   7  16   4   80.19   16.50
   7  16   4   64.99   15.50
   8  16   4    2.90   13.50
   8  16   4   35.50   14.30
   9  16   4  -27.60   13.80
   9  16   4    8.30   13.70
  10  16   4   -0.20   14.50
  10  16   4   14.10   18.40
  11  16   4  -35.30   19.10
  11  16   4    3.20   18.30
  12  16   4   69.49   25.50
  12  16   4  125.19   29.00
  12 -17  -4   19.00   14.40
  11 -17  -4   11.20   12.80
  11 -17  -4   -3.00    9.40
  10 -17  -4    9.90   11.30
  10 -17  -4    3.00    9.20
   9 -17  -4   44.50   13.10
   9 -17  -4   57.09   11.20
   8 -17  -4    5.80    9.10
   7 -17  -4   36.20   10.50
   6 -17  -4   16.60    9.50
   5 -17  -4    4.10    9.10
   4 -17  -4  130.29   16.80
   3 -17  -4  248.58   25.60
   2 -17  -4   28.10    9.90
   1 -17  -4  394.16   34.10
   0 -17  -4   45.80   11.20
  -1 -17  -4  140.69   18.90
  -2 -17  -4  -12.20    9.40
  -3 -17  -4  178.48   23.00
   4  17   4   -7.50   10.20
   5  17   4   -7.80   11.30
   5  17   4    2.80   12.30
   6  17   4   69.19   16.00
   6  17   4   69.19   16.50
   7  17   4   37.50   14.20
   7  17   4   -7.20   12.90
   8  17   4   14.30   14.90
   8  17   4   -1.50   14.30
   9  17   4   25.90   15.10
   9  17   4    4.60   15.90
  10  17   4  -16.10   19.30
  10  17   4   42.10   18.30
  11  17   4    5.90   22.60
  11  17   4   21.60   19.70
  11 -18  -4   27.30   14.60
  11 -18  -4    7.60   10.60
  10 -18  -4   -1.40   11.50
  10 -18  -4    8.80   10.30
   9 -18  -4   24.40   13.40
   9 -18  -4   12.40   10.10
   8 -18  -4    8.40   10.10
   7 -18  -4   23.70   10.50
   6 -18  -4   60.69   13.00
   5 -18  -4   29.60   11.50
   4 -18  -4   10.20   10.90
   3 -18  -4   -3.60   10.50
   2 -18  -4   81.19   15.10
   1 -18  -4   19.60   11.00
   0 -18  -4    4.30   10.40
  -1 -18  -4   14.80   10.50
  -2 -18  -4   -4.70   10.80
  -3 -18  -4   99.19   15.90
  -4 -18  -4   -2.60   11.10
   4  18   4   15.00   13.20
   5  18   4   12.70   13.60
   6  18   4   33.80   15.50
   6  18   4   44.00   14.20
   7  18   4  109.99   19.90
   7  18   4  154.58   22.80
   8  18   4   18.30   15.70
   8  18   4   35.30   18.30
   9  18   4   25.50   18.70
   9  18   4   11.10   17.60
  10  18   4   44.60   20.40
  10  18   4   47.30   23.70
  11  18   4   39.80   23.70
  11  18   4   46.40   25.40
  10 -19  -4    6.50   11.80
  10 -19  -4   38.80   15.20
   9 -19  -4    1.40   12.30
   9 -19  -4   19.30   11.40
   8 -19  -4   14.40   11.20
   7 -19  -4   12.50   11.40
   6 -19  -4   16.70   11.30
   5 -19  -4    3.30   10.90
   4 -19  -4   41.30   13.10
   3 -19  -4  176.68   25.10
   2 -19  -4   87.89   15.70
   1 -19  -4  200.88   24.90
   0 -19  -4    0.80   11.60
  -1 -19  -4   51.79   13.00
  -2 -19  -4   -2.10   10.60
  -3 -19  -4   -2.20   11.40
  -4 -19  -4   -9.50   10.40
  -5 -19  -4    1.60   13.00
   5  19   4   45.70   17.00
   6  19   4  121.59   22.20
   7  19   4    2.30   15.60
   8  19   4   29.60   19.20
   8  19   4   44.00   18.90
   9  19   4   12.10   21.40
   9  19   4  -10.30   18.70
  10  19   4   12.10   23.40
  10  19   4   -4.00   20.60
   9 -20  -4   12.00   13.90
   9 -20  -4   27.10   13.10
   8 -20  -4    1.30   11.90
   7 -20  -4    6.80   12.00
   6 -20  -4   -4.60   12.00
   5 -20  -4   12.50   12.00
   4 -20  -4   21.40   14.40
   3 -20  -4   13.10   13.40
   2 -20  -4   12.20   12.80
   1 -20  -4   32.60   13.20
   0 -20  -4   21.30   13.40
  -1 -20  -4    3.90   12.70
  -2 -20  -4   18.70   12.40
  -3 -20  -4  -10.40   12.60
  -4 -20  -4    7.00   13.60
  -5 -20  -4   80.39   17.40
  -6 -20  -4   -7.70   16.10
   6  20   4   16.80   17.00
  -7 -20  -4   98.19   20.80
   7  20   4  105.79   23.50
   8  20   4    4.60   18.60
   9  20   4  -13.40   19.60
   8 -21  -4   -1.70   13.20
   7 -21  -4   13.20   13.90
   6 -21  -4   45.50   15.50
   5 -21  -4    1.10   13.40
   4 -21  -4  121.39   20.60
   3 -21  -4    2.00   14.80
   2 -21  -4   21.50   15.20
   1 -21  -4    0.60   13.40
   0 -21  -4   25.80   14.70
  -1 -21  -4    3.90   13.90
  -2 -21  -4   44.30   16.60
  -3 -21  -4  -11.50   14.10
  -4 -21  -4    0.60   14.10
  -5 -21  -4   17.70   15.30
  -6 -21  -4   79.59   21.00
   6  21   4  101.09   24.00
  -7 -21  -4    9.00   18.80
   7  21   4   -1.80   20.90
  -8 -21  -4   60.39   22.00
   8  21   4   81.39   24.40
   7 -22  -4   45.80   16.70
   6 -22  -4   15.80   15.70
   5 -22  -4   10.90   15.30
   4 -22  -4   21.40   16.30
   3 -22  -4   -4.20   14.60
   2 -22  -4   37.60   16.80
   1 -22  -4   76.39   19.40
   0 -22  -4  150.58   23.60
  -1 -22  -4   53.79   16.30
  -2 -22  -4    5.90   15.30
  -3 -22  -4   59.19   18.50
  -4 -22  -4   48.30   18.40
  -5 -22  -4   10.70   15.70
  -6 -22  -4   -7.60   18.20
   5 -23  -4   53.79   19.40
   4 -23  -4   12.70   17.40
   3 -23  -4    8.40   17.90
   2 -23  -4   40.80   19.20
   1 -23  -4   73.29   20.30
   0 -23  -4   61.49   19.40
  -1 -23  -4   76.49   20.00
  -2 -23  -4   52.69   18.80
  -3 -23  -4   43.50   19.40
  -4 -23  -4   61.29   21.70
   2 -24  -4   32.10   19.80
   1 -24  -4   -3.90   18.20
   0 -24  -4   21.60   20.10
  -1 -24  -4  -10.90   18.20
  -1 -21   5   33.50   17.20
   0 -21   5   15.70   15.60
   1 -21   5   -6.10   15.90
   2 -21   5   58.19   18.00
   3 -21   5   -0.40   15.70
   4 -21   5   28.10   16.60
   5 -21   5   -1.60   15.60
   3  20  -5  -10.90   19.00
  -3 -20   5    0.10   15.60
  -2 -20   5   18.90   17.00
  -1 -20   5   11.30   14.70
   0 -20   5    5.90   15.10
   1 -20   5  -11.80   13.50
   2 -20   5   37.10   15.10
   3 -20   5   63.79   16.00
   4 -20   5    4.90   14.30
   5 -20   5    2.40   13.90
   6 -20   5  -11.10   14.20
   7 -20   5   17.90   14.70
   5  19  -5   19.60   21.40
  -5 -19   5  -10.90   16.50
   4  19  -5   38.80   19.00
  -4 -19   5   18.50   16.00
   3  19  -5   37.30   19.70
  -3 -19   5   16.70   16.40
   2  19  -5   24.40   18.70
  -2 -19   5  -16.70   13.10
  -1 -19   5   82.89   17.20
   0 -19   5   14.10   13.70
   1 -19   5  115.49   19.00
   2 -19   5    2.80   13.10
   3 -19   5   29.20   13.70
   4 -19   5   -6.10   12.40
   5 -19   5   32.80   14.00
   6 -19   5   -8.00   11.40
   7 -19   5    5.50   13.40
   8 -19   5  104.49   18.30
   9 -19   5   -2.90   13.00
   6  18  -5   11.30   18.90
  -6 -18   5  -13.60   15.40
   5  18  -5   89.79   20.60
  -5 -18   5   73.09   18.10
   4  18  -5    6.60   16.90
  -4 -18   5   17.00   14.40
   3  18  -5   33.40   16.90
  -3 -18   5   30.60   14.90
   2  18  -5   28.20   16.20
  -2 -18   5    4.90   12.80
  -1 -18   5   55.99   15.00
   0 -18   5   -0.30   11.20
   1 -18   5  234.58   27.00
   2 -18   5   34.90   13.30
   3 -18   5   22.30   12.00
   4 -18   5   56.59   13.30
   5 -18   5   13.70   11.70
   6 -18   5    4.20   11.40
   7 -18   5    7.60   12.20
   8 -18   5   29.90   14.00
   9 -18   5   -1.90   12.50
  10 -18   5   17.70   12.60
   7  17  -5   38.30   22.10
  -7 -17   5   20.10   16.10
   6  17  -5   42.10   18.90
  -6 -17   5   27.00   14.70
   5  17  -5   -8.90   16.70
  -5 -17   5   15.50   14.20
   4  17  -5   45.20   17.00
  -4 -17   5   14.60   13.70
   3  17  -5   53.89   17.40
  -3 -17   5   65.79   15.40
   2  17  -5   11.50   13.70
  -2 -17   5    9.70   11.90
   1  17  -5  152.28   24.00
  -1 -17   5  198.38   24.30
   0 -17   5  438.16   38.50
   1 -17   5   92.39   15.10
   2 -17   5    5.00   10.70
   3 -17   5   87.19   14.70
   4 -17   5  234.38   25.80
   5 -17   5   15.00   10.20
   6 -17   5  211.08   24.50
   7 -17   5    9.70   11.00
   8 -17   5    5.20   10.90
   9 -17   5   33.40   12.70
  10 -17   5    3.10   11.70
  11 -17   5    4.40   11.80
   8  16  -5   12.20   21.20
  -8 -16   5   35.40   15.80
   7  16  -5   27.30   18.30
  -7 -16   5   20.90   14.80
   6  16  -5   26.40   17.40
  -6 -16   5   30.90   14.10
   5  16  -5  125.99   21.50
  -5 -16   5  140.79   19.10
   4  16  -5   -3.40   12.30
  -4 -16   5    9.20   12.20
   3  16  -5    3.00   13.50
  -3 -16   5   15.10   11.70
   2  16  -5   90.59   18.00
  -2 -16   5  103.09   16.30
   1  16  -5   56.39   15.70
  -1 -16   5   44.60   11.90
   0 -16   5   60.69   12.40
   1 -16   5    4.10    9.60
   2 -16   5   72.19   13.50
   3 -16   5   36.10   11.30
   4 -16   5   22.70    9.70
   5 -16   5   14.60    9.90
   6 -16   5    4.70    9.30
   7 -16   5   26.70   10.50
   8 -16   5   19.10   11.20
   9 -16   5    5.60   10.10
  10 -16   5  145.49   20.80
  11 -16   5  112.79   15.60
  12 -16   5    8.90   10.50
  12 -16   5   -5.20   12.70
   9  15  -5   38.80   24.90
  -9 -15   5    4.00   13.80
   8  15  -5   -7.70   17.80
  -8 -15   5   16.80   13.60
   7  15  -5   24.40   17.00
  -7 -15   5   18.50   12.40
   6  15  -5   47.30   17.30
  -6 -15   5   62.89   14.30
   5  15  -5  332.17   37.90
  -5 -15   5  392.86   34.30
   4  15  -5   -6.10   11.40
  -4 -15   5    0.60   10.30
   3  15  -5   -6.90   11.10
  -3 -15   5    4.30   10.10
   2  15  -5   78.39   16.10
  -2 -15   5  110.59   15.60
   1  15  -5   15.40   12.70
  -1 -15   5   17.50   10.40
   0  15  -5   -4.80   11.80
   0 -15   5    6.10    9.30
   1 -15   5   24.20   10.50
   2 -15   5   38.90   10.50
   3 -15   5    8.00    8.70
   4 -15   5  191.08   20.20
   5 -15   5    5.90    8.10
   6 -15   5    6.10    8.70
   7 -15   5   43.60   10.30
   8 -15   5   -7.20    9.20
   9 -15   5   11.60    9.80
  10 -15   5  283.57   27.20
  11 -15   5    7.90   10.30
  12 -15   5   -0.40   11.50
  12 -15   5    5.10   10.00
  13 -15   5   -8.20   10.20
  13 -15   5    6.60   12.60
  10  14  -5  158.78   31.50
 -10 -14   5  125.89   19.70
   9  14  -5   37.80   22.70
  -9 -14   5   -6.00   13.20
   8  14  -5   -7.30   16.60
  -8 -14   5   -6.10   12.30
   7  14  -5    6.70   14.40
  -7 -14   5   14.50   11.90
   6  14  -5   31.30   14.20
  -6 -14   5   33.00   12.30
   5  14  -5  -10.10   10.10
  -5 -14   5   13.60   10.50
   4  14  -5   -5.80   10.50
  -4 -14   5    7.50   10.00
   3  14  -5    1.30   10.80
  -3 -14   5    8.80    9.20
   2  14  -5    5.10   11.40
  -2 -14   5   28.40   10.00
   1  14  -5  331.47   34.00
  -1 -14   5  327.47   29.20
   0  14  -5   56.09   13.50
   0 -14   5   92.59   12.80
   1 -14   5   95.99   13.20
   2 -14   5  252.27   24.10
   3 -14   5  284.17   25.90
   4 -14   5   64.39   11.30
   5 -14   5  236.08   22.90
   6 -14   5  105.59   13.60
   7 -14   5  104.79   14.80
   8 -14   5   28.70    8.80
   9 -14   5   -0.50    7.60
  10 -14   5  227.68   23.00
  11 -14   5    8.40    9.60
  11 -14   5    5.20   10.20
  12 -14   5   20.70    9.70
  12 -14   5   -0.20   10.80
  13 -14   5   12.30   10.40
  13 -14   5   25.20   13.00
  14 -14   5   59.89   14.10
  10  13  -5   35.30   23.70
 -10 -13   5    8.20   13.20
   9  13  -5   37.40   21.10
  -9 -13   5    0.50   12.30
   8  13  -5   26.60   18.00
  -8 -13   5   -8.60   11.00
   7  13  -5  100.89   20.40
  -7 -13   5  110.39   16.40
   6  13  -5   28.80   14.10
  -6 -13   5   59.29   12.80
   5  13  -5  104.89   18.10
  -5 -13   5  137.89   19.50
   4  13  -5   38.00   11.70
  -4 -13   5   59.69   11.60
   3  13  -5   36.30   12.50
  -3 -13   5   20.40    9.90
   2  13  -5    8.80    9.20
  -2 -13   5  -11.40    8.40
   1  13  -5    0.90   10.40
  -1 -13   5   13.10    8.30
   0  13  -5   52.09   13.10
   0 -13   5   49.80    9.80
   1 -13   5  537.65   41.50
   2 -13   5   70.19   11.10
   3 -13   5  126.89   16.70
   4 -13   5  179.58   18.80
   5 -13   5   83.79   11.80
   6 -13   5  376.86   30.80
   7 -13   5    5.80    8.20
   8 -13   5   43.50    9.90
   9 -13   5  177.78   18.40
  10 -13   5    0.40    8.20
  11 -13   5   -5.20    7.50
  11 -13   5    2.90    9.70
  12 -13   5   68.59   12.00
  12 -13   5   69.29   13.50
  13 -13   5    3.60    9.20
  13 -13   5   11.20   10.40
  14 -13   5    1.20   10.90
  14 -13   5   23.40   10.40
  11  12  -5   39.40   29.20
 -11 -12   5    8.70   13.10
  10  12  -5   29.20   20.80
 -10 -12   5   -4.20   12.30
   9  12  -5   80.39   21.70
  -9 -12   5   72.09   14.60
   8  12  -5   38.10   18.00
  -8 -12   5   53.39   12.70
   7  12  -5  434.06   42.00
   7  12  -5  420.86   32.10
  -7 -12   5  452.25   37.00
   6  12  -5  366.26   28.40
   6  12  -5  399.26   37.30
  -6 -12   5  400.66   33.50
   5  12  -5    4.40    9.80
   5  12  -5    2.80    5.40
  -5 -12   5   -0.40    8.60
   4  12  -5   72.39   14.30
  -4 -12   5   75.39   12.00
   3  12  -5  390.16   36.70
  -3 -12   5  452.85   34.50
   2  12  -5    3.80    9.00
  -2 -12   5   -4.20    6.60
   1  12  -5  242.38   25.80
  -1 -12   5  268.67   23.40
   0  12  -5  164.78   22.70
   0 -12   5  198.88   19.40
  -1  12  -5  135.29   19.50
   1 -12   5  110.89   15.30
   2 -12   5   12.60    7.60
   3 -12   5    5.00    6.40
   4 -12   5   17.20    7.50
   5 -12   5  100.29   13.30
   6 -12   5   96.89   13.20
   7 -12   5  101.09   12.80
   8 -12   5  218.38   20.10
   9 -12   5   11.40    7.60
  10 -12   5   53.39    9.70
  11 -12   5   18.30    8.00
  11 -12   5   11.20    9.30
  12 -12   5   -6.00    8.70
  12 -12   5   -9.50    8.10
  13 -12   5   15.30    9.40
  13 -12   5   -3.30    9.40
  14 -12   5   -1.70   10.10
  14 -12   5   13.70    9.80
  15 -12   5   17.40   11.80
  15 -12   5    5.40   10.70
  12  11  -5  -13.70   33.70
  11  11  -5  -26.90   24.60
 -11 -11   5   13.00   12.30
  10  11  -5   45.60   23.10
 -10 -11   5    8.00   11.30
   9  11  -5    7.20   17.60
  -9 -11   5   18.30   10.60
   8  11  -5   99.59   13.10
   8  11  -5   89.99   19.60
  -8 -11   5  102.09   14.20
   7  11  -5   80.29   16.80
   7  11  -5  105.29   11.70
  -7 -11   5   85.79   13.00
   6  11  -5   23.30   11.10
   6  11  -5   29.20    7.20
  -6 -11   5   17.00    8.70
   5  11  -5   28.70   10.90
   5  11  -5   46.70    7.30
  -5 -11   5   33.50    9.20
   4  11  -5   19.60    5.90
   4  11  -5   33.10   10.60
  -4 -11   5   35.90    8.30
   3  11  -5  166.88   14.60
   3  11  -5  147.59   20.90
  -3 -11   5  197.78   18.40
   2  11  -5  414.46   36.80
  -2 -11   5  462.95   32.80
  -2 -11   5  458.55   34.80
   1  11  -5  215.28   23.00
  -1 -11   5  200.38   19.50
   0  11  -5   50.69    9.90
   0 -11   5   44.00    8.20
  -1  11  -5  220.18   22.20
   1 -11   5  198.18   19.10
   2 -11   5  179.78   16.80
   3 -11   5   33.30    7.20
   4 -11   5  271.17   23.00
   5 -11   5   64.09    9.50
   6 -11   5  187.88   18.10
   7 -11   5  252.27   21.60
   8 -11   5   84.09   10.90
   9 -11   5   79.19   10.90
  10 -11   5  -11.20    6.90
  10 -11   5    0.80    6.80
  11 -11   5  244.68   22.60
  11 -11   5  203.28   20.30
  12 -11   5    9.90    7.40
  12 -11   5   10.40    8.70
  13 -11   5   -3.10    8.00
  13 -11   5   10.90    8.90
  14 -11   5    2.20    9.00
  14 -11   5    6.20    9.50
  15 -11   5    7.10   10.50
  15 -11   5  -11.10    9.80
  12  10  -5   -8.90   29.00
  11  10  -5   33.50   26.50
 -11 -10   5   -0.40   10.90
  10  10  -5    3.90   20.20
 -10 -10   5    0.90    9.40
   9  10  -5   26.10   10.60
   9  10  -5   18.10   17.00
  -9 -10   5    9.50    8.90
   8  10  -5  110.99   15.90
   8  10  -5  141.79   21.60
  -8 -10   5  124.29   17.30
   7  10  -5   67.99   10.00
   7  10  -5   43.10   14.00
  -7 -10   5   60.89   11.40
   6  10  -5   14.70    6.70
   6  10  -5  -18.50    8.80
  -6 -10   5   -3.40    7.60
   5  10  -5   -9.60    7.80
   5  10  -5    1.60    5.40
  -5 -10   5    5.00    7.50
   4  10  -5  414.86   29.50
   4  10  -5  353.86   34.30
  -4 -10   5  420.16   32.20
   3  10  -5    1.70    7.40
   3  10  -5    0.30    4.50
  -3 -10   5    3.10    6.70
   2  10  -5  215.68   18.30
   2  10  -5  237.48   23.10
  -2 -10   5  260.47   20.90
  -2 -10   5  230.38   18.80
   1  10  -5   21.70    8.40
  -1 -10   5   16.70    6.90
   0  10  -5  312.17   26.60
   0 -10   5  269.77   23.30
  -1  10  -5   33.50    9.20
   1 -10   5   33.10    7.40
   2 -10   5  337.47   26.40
   3 -10   5 1329.07   92.59
   4 -10   5  330.97   26.10
   5 -10   5   -2.60    4.70
   6 -10   5   44.70    7.90
   7 -10   5  130.49   13.80
   8 -10   5   19.30    6.50
   9 -10   5  300.77   24.10
  10 -10   5    6.40    7.30
  10 -10   5   11.10    6.30
  11 -10   5   12.00    7.80
  11 -10   5    0.70    6.40
  12 -10   5  307.27   26.80
  12 -10   5  296.77   25.20
  13 -10   5    4.70    8.10
  13 -10   5    7.10    7.90
  14 -10   5   61.49   11.40
  14 -10   5   67.49   11.00
  15 -10   5   -9.90    8.70
  15 -10   5    7.00    9.70
  13   9  -5  -34.50   32.60
  12   9  -5  -57.39   24.20
  11   9  -5   20.30   15.40
  11   9  -5   14.70   25.40
 -11  -9   5    8.60   10.00
  10   9  -5    6.80   13.40
  10   9  -5  -28.60   18.40
 -10  -9   5  -15.70    9.20
   9   9  -5   41.20   16.20
   9   9  -5   28.70   10.70
  -9  -9   5   26.40   10.40
   8   9  -5   24.70    8.80
   8   9  -5   28.30   13.00
   7   9  -5  531.95   38.40
   7   9  -5  434.46   43.10
  -7  -9   5  552.34   39.70
   6   9  -5   18.90    6.80
   6   9  -5   23.60   10.10
  -6  -9   5   27.60    8.10
   5   9  -5  154.38   19.80
   5   9  -5  176.18   15.60
  -5  -9   5  177.68   17.40
   4   9  -5   62.69    7.90
   4   9  -5   51.19   10.60
  -4  -9   5   52.89    8.80
   3   9  -5   36.50    6.00
   3   9  -5   16.00    8.00
  -3  -9   5   28.60    6.80
   2   9  -5   72.99   11.40
   2   9  -5   78.29    8.70
  -2  -9   5   57.99    8.80
   1   9  -5  283.07   25.00
   1   9  -5  270.17   21.00
  -1  -9   5  286.87   22.60
  -1  -9   5  270.77   21.50
   0   9  -5  137.49   16.50
   0  -9   5  143.99   14.30
  -1   9  -5  315.07   26.10
   1  -9   5  297.27   24.00
   2  -9   5  355.46   27.40
   3  -9   5 1309.07   90.99
   4  -9   5    4.90    4.80
   5  -9   5  253.37   20.60
   6  -9   5   13.50    5.70
   7  -9   5  356.16   27.50
   8  -9   5  329.67   25.90
   9  -9   5   13.20    6.10
  10  -9   5    9.70    6.00
  10  -9   5    0.60    6.20
  11  -9   5  307.47   25.00
  11  -9   5  267.77   23.40
  12  -9   5   38.10    9.10
  12  -9   5   37.80    8.50
  13  -9   5   38.40    9.10
  13  -9   5   39.40    9.00
  14  -9   5   15.30    8.40
  14  -9   5   14.20    8.50
  15  -9   5   28.20    9.70
  15  -9   5   21.70    9.70
  16  -9   5   12.30   10.40
  16  -9   5   -2.50    9.30
  13   8  -5   41.30   34.90
  12   8  -5   18.30   18.70
  12   8  -5  -48.10   25.90
  11   8  -5    8.50   22.70
  11   8  -5   51.29   19.20
 -11  -8   5   42.80   11.70
  10   8  -5   27.40   17.70
  10   8  -5   30.90   13.50
 -10  -8   5    5.70    8.50
   9   8  -5   21.30   10.90
   9   8  -5   35.20   17.40
  -9  -8   5    4.00    8.30
   8   8  -5   42.70   14.80
   8   8  -5   60.79   11.10
  -8  -8   5   57.19   10.00
   7   8  -5   25.10    7.90
   7   8  -5   18.20   11.60
  -7  -8   5   28.40    8.10
   6   8  -5   18.30    9.40
   6   8  -5   31.50    7.10
  -6  -8   5   12.90    6.80
   5   8  -5   73.69   10.10
   5   8  -5   60.39   11.20
  -5  -8   5   75.69    9.80
   4   8  -5   45.30    6.90
   4   8  -5   35.00    8.20
  -4  -8   5   38.80    7.30
   3   8  -5  137.29   12.70
   3   8  -5  135.99   17.40
  -3  -8   5  152.88   14.10
   2   8  -5  299.57   22.00
   2   8  -5  283.77   25.30
  -2  -8   5  286.77   23.00
   1   8  -5    2.70    3.90
   1   8  -5    7.70    6.40
  -1  -8   5    8.60    4.70
  -1  -8   5    4.50    4.70
   0   8  -5   18.50    4.80
   0   8  -5   27.90    7.40
   0  -8   5   21.50    5.80
  -1   8  -5    1.90    5.10
   1  -8   5    5.00    4.80
   2  -8   5  128.19   12.20
   3  -8   5  245.98   19.80
   4  -8   5  127.09   12.60
   5  -8   5  636.54   45.40
   6  -8   5  210.18   18.00
   7  -8   5  286.27   22.30
   8  -8   5   23.40    6.00
   9  -8   5   44.10    7.60
   9  -8   5   50.89    7.50
  10  -8   5   92.89   12.20
  10  -8   5   73.29   10.90
  11  -8   5   10.30    6.30
  11  -8   5   14.10    6.40
  12  -8   5   15.70    7.20
  12  -8   5   20.90    7.30
  13  -8   5   23.80    7.90
  13  -8   5   27.90    7.90
  14  -8   5   51.99    9.90
  14  -8   5   60.79   10.00
  15  -8   5    1.00    8.30
  15  -8   5    3.50    8.20
  16  -8   5   20.90   10.20
  16  -8   5   22.60    9.60
  13   7  -5  -22.90   28.10
  11   7  -5    9.20   22.30
  10   7  -5  276.57   40.30
  10   7  -5  316.27   30.40
 -10  -7   5  290.07   26.10
   9   7  -5    4.80   10.40
   9   7  -5   -5.40   13.20
  -9  -7   5   -2.30    7.00
   8   7  -5  230.78   22.10
   8   7  -5  220.78   28.90
  -8  -7   5  224.08   20.60
   7   7  -5   55.99    9.60
   7   7  -5   34.40   11.40
  -7  -7   5   62.69    9.10
   6   7  -5   13.70    9.30
   6   7  -5    4.00    6.10
  -6  -7   5    6.40    5.60
   5   7  -5    0.90    5.10
   5   7  -5   -1.90    6.90
  -5  -7   5    1.40    5.20
   4   7  -5  628.84   49.90
   4   7  -5  653.23   47.20
  -4  -7   5  713.63   47.90
   3   7  -5  156.68   13.80
   3   7  -5  158.98   16.80
  -3  -7   5  159.28   14.20
   2   7  -5  786.92   55.09
   2   7  -5  789.92   57.29
  -2  -7   5  792.22   55.69
   1   7  -5  485.75   35.90
   1   7  -5  466.85   33.40
  -1  -7   5  439.46   33.90
  -1  -7   5  479.25   33.60
   0   7  -5    3.20    4.60
   0   7  -5    1.40    3.80
   0  -7   5    9.90    4.50
   0  -7   5   12.10    4.80
  -1   7  -5  135.09   11.80
  -1   7  -5  143.09   14.20
   1  -7   5  128.49   12.30
  -2   7  -5   64.89    8.70
   2  -7   5   65.69    8.60
   3  -7   5  180.28   15.30
   4  -7   5  934.21   65.19
   5  -7   5  708.03   50.09
   6  -7   5    3.50    4.40
   7  -7   5    5.10    4.80
   8  -7   5    8.10    4.50
   9  -7   5   58.29    7.90
   9  -7   5   51.79    7.50
  10  -7   5    3.90    5.40
  10  -7   5    3.30    5.10
  11  -7   5   93.19   12.40
  11  -7   5  112.89   13.30
  12  -7   5   12.40    6.50
  12  -7   5   -4.20    5.70
  13  -7   5   67.99    9.90
  13  -7   5   60.19    9.50
  14  -7   5    6.30    6.70
  14  -7   5   -3.50    6.90
  15  -7   5   -3.30    7.50
  15  -7   5   -0.30    7.80
  16  -7   5    4.40    9.20
  16  -7   5    2.70    8.50
  14   6  -5   27.50   29.30
  13   6  -5  -43.30   26.40
  12   6  -5  -53.59   24.10
 -11  -6   5  372.66   30.50
  10   6  -5  -10.50   15.30
 -10  -6   5    7.20    7.20
   9   6  -5    1.40   14.30
  -9  -6   5    3.50    6.50
   8   6  -5  421.16   40.70
  -8  -6   5  488.45   35.00
   7   6  -5  126.99   14.80
   7   6  -5  106.79   17.00
  -7  -6   5  117.29   13.40
   6   6  -5  189.68   21.20
   6   6  -5  166.88   16.90
  -6  -6   5  199.48   16.60
   5   6  -5 1199.98   85.59
  -5  -6   5 1270.77   85.59
   4   6  -5 1066.59   78.39
   4   6  -5 1101.99   76.59
  -4  -6   5 1144.29   76.69
   3   6  -5  102.19   10.50
   3   6  -5  115.39   13.50
  -3  -6   5  114.29   10.80
   2   6  -5  303.97   22.50
   2   6  -5  290.57   24.20
  -2  -6   5  302.77   22.70
   1   6  -5  725.73   50.49
   1   6  -5  774.22   52.39
  -1  -6   5  657.53   50.49
  -1  -6   5  734.43   50.49
   0   6  -5    6.10    3.80
   0   6  -5    4.20    4.10
   0  -6   5    3.10    3.70
   0  -6   5    4.20    3.90
  -1   6  -5   16.50    5.20
  -1   6  -5   10.90    4.10
   1  -6   5   10.60    3.70
   1  -6   5    2.70    4.80
  -2   6  -5  756.02   55.79
   2  -6   5  819.52   55.19
   3  -6   5    0.10    3.50
   4  -6   5  605.54   42.90
   5  -6   5   40.30    6.10
   6  -6   5  102.19   10.40
   7  -6   5   -1.30    3.90
   8  -6   5  664.23   45.90
   8  -6   5  628.74   45.90
   9  -6   5   41.00    6.50
   9  -6   5   48.70    6.80
  10  -6   5   24.50    5.60
  10  -6   5   23.90    5.80
  11  -6   5  332.67   26.10
  11  -6   5  337.27   26.00
  12  -6   5   38.60    7.40
  12  -6   5   42.60    7.50
  13  -6   5    6.20    6.10
  13  -6   5    6.20    6.50
  14  -6   5   32.80    8.20
  14  -6   5   26.30    7.50
  15  -6   5   40.30    9.00
  15  -6   5   44.70    9.40
  16  -6   5    7.00    9.30
  16  -6   5    3.70    8.20
  14   5  -5    5.00   30.30
  13   5  -5   63.89   27.70
  12   5  -5   47.30   25.30
  11   5  -5  -15.60   19.30
  10   5  -5   -6.20   14.00
   9   5  -5   33.60   16.30
   8   5  -5   81.89   16.40
  -8  -5   5   94.59   11.90
   7   5  -5   42.30   12.30
  -7  -5   5   39.40    6.80
   6   5  -5  161.78   18.20
  -6  -5   5  162.58   14.60
   5   5  -5  702.33   53.59
   5   5  -5  720.93   51.29
  -5  -5   5  742.73   50.89
  -5  -5   5  720.53   50.29
   4   5  -5    9.30    5.40
   4   5  -5   14.10    4.80
  -4  -5   5   13.90    4.40
  -4  -5   5    8.70    4.00
   3   5  -5  754.12   51.89
   3   5  -5  707.13   53.09
  -3  -5   5  756.92   51.59
  -3  -5   5  739.03   51.69
   2   5  -5  137.79   13.50
   2   5  -5  126.69   11.70
  -2  -5   5  138.19   11.70
  -2  -5   5  129.29   11.40
   1   5  -5  336.27   24.10
   1   5  -5  330.67   23.90
   1   5  -5  343.27   25.50
  -1  -5   5  318.67   23.90
  -1  -5   5  303.87   23.80
   0   5  -5  235.18   19.00
   0   5  -5  214.68   17.70
   0  -5   5  225.68   17.70
   0  -5   5  250.07   17.90
  -1   5  -5   28.80    4.80
  -1   5  -5   24.30    4.90
   1  -5   5   16.70    4.50
   1  -5   5   25.40    4.40
   1  -5   5   31.30    5.60
  -2   5  -5    4.30    3.70
  -2   5  -5    0.50    3.40
   2  -5   5    3.40    3.90
   2  -5   5    3.70    3.20
   2  -5   5    2.30    3.70
   3  -5   5   46.90    7.10
   3  -5   5   62.49    6.70
   4  -5   5  795.52   55.29
   5  -5   5   20.10    4.30
   6  -5   5  553.74   39.20
   7  -5   5   18.00    4.30
   8  -5   5  136.39   12.20
   8  -5   5  134.59   12.40
   9  -5   5  659.73   47.50
   9  -5   5  682.63   47.40
  10  -5   5   70.19    9.50
  10  -5   5   46.90    7.10
  11  -5   5    2.90    4.90
  11  -5   5   -5.30    5.10
  12  -5   5   -4.10    5.00
  12  -5   5   -4.70    5.30
  13  -5   5   31.60    7.30
  13  -5   5   39.60    7.90
  14  -5   5  159.88   17.20
  14  -5   5  162.58   16.50
  15  -5   5    5.20    7.40
  15  -5   5   20.80    8.20
  16  -5   5   30.10    9.70
  16  -5   5   15.40    8.70
  17  -5   5   75.19   12.30
  17  -5   5   54.09   12.20
  14   4  -5  -26.90   24.70
  13   4  -5  -51.49   21.30
  12   4  -5  -41.50   19.90
  11   4  -5  -32.40   17.10
  10   4  -5   35.10   16.60
   9   4  -5    6.10   13.10
  -9  -4   5    9.40    3.60
   8   4  -5   -1.80   11.40
  -8  -4   5   27.40    4.20
   7   4  -5  179.88   22.70
  -7  -4   5  185.68   14.30
   6   4  -5  356.76   32.80
  -6  -4   5  438.36   28.10
  -6  -4   5  366.06   28.60
   5   4  -5    4.80    6.40
  -5  -4   5    6.30    3.80
  -5  -4   5   12.30    3.50
   4   4  -5   54.39    7.30
   4   4  -5   48.70    8.00
  -4  -4   5   52.19    6.90
  -4  -4   5   59.59    6.70
   3   4  -5  699.63   51.69
   3   4  -5  734.73   50.79
  -3  -4   5  763.82   50.19
  -3  -4   5  696.13   50.29
   2   4  -5  567.34   43.40
   2   4  -5  587.64   42.70
  -2  -4   5  633.44   42.30
  -2  -4   5  627.24   42.30
   1   4  -5  134.49   12.70
   1   4  -5  142.29   11.70
   1   4  -5  140.19   11.20
  -1  -4   5  135.39   11.50
  -1  -4   5  128.49   11.20
   0   4  -5 1610.84  107.19
   0   4  -5 1570.94  106.19
   0   4  -5 1521.25  106.49
   0  -4   5 1564.34  106.69
   0  -4   5 1439.76  106.09
   0  -4   5 1626.54  106.49
  -1   4  -5  437.86   33.50
  -1   4  -5  468.75   34.10
  -1   4  -5  459.55   33.70
   1  -4   5  496.75   34.00
   1  -4   5  492.45   33.50
   1  -4   5  485.15   33.90
  -2   4  -5    7.30    3.70
  -2   4  -5    0.20    2.10
  -2   4  -5   -0.10    2.70
   2  -4   5    4.30    3.30
   2  -4   5    3.10    2.80
   2  -4   5    4.70    3.90
   3  -4   5  208.78   16.30
   3  -4   5  220.18   17.20
   4  -4   5    1.60    3.10
   5  -4   5  742.53   51.69
   6  -4   5  459.45   32.80
   7  -4   5  786.02   53.89
   7  -4   5  759.22   53.59
   8  -4   5   18.40    3.90
   8  -4   5   15.60    4.80
   9  -4   5  172.88   15.20
   9  -4   5  179.48   14.60
  10  -4   5   17.20    4.90
  10  -4   5    1.60    4.70
  11  -4   5   19.30    5.50
  11  -4   5   23.20    5.80
  12  -4   5   11.60    5.80
  12  -4   5   12.40    5.70
  13  -4   5   19.90    6.40
  13  -4   5   11.00    6.30
  14  -4   5   44.30    8.40
  14  -4   5   41.70    8.60
  15  -4   5  145.79   17.40
  15  -4   5  179.08   19.20
  16  -4   5  144.49   17.90
  16  -4   5  137.49   19.60
  17  -4   5    5.40    9.40
  17  -4   5    1.90   10.50
  14   3  -5  -24.40   20.70
  13   3  -5   -8.90   20.40
  12   3  -5  -33.40   18.90
  11   3  -5  -20.60   14.70
  10   3  -5  -22.80   13.70
  10   3  -5  -13.50    5.90
   9   3  -5  264.77   24.10
  -9  -3   5  344.57   22.40
   8   3  -5   -5.80   11.30
  -8  -3   5    6.90    2.80
   7   3  -5   38.10   10.70
  -7  -3   5   53.89    5.70
   6   3  -5   21.70    8.20
  -6  -3   5   26.30    4.50
  -6  -3   5   24.00    3.50
   5   3  -5   14.40    6.60
  -5  -3   5   18.60    3.20
  -5  -3   5   15.30    3.70
   4   3  -5  492.05   36.60
  -4  -3   5  481.95   34.40
  -4  -3   5  499.55   34.20
   3   3  -5  222.48   19.00
   3   3  -5  229.98   18.10
  -3  -3   5  238.78   17.00
  -3  -3   5  233.98   17.10
   2   3  -5   14.20    4.20
   2   3  -5   19.10    4.20
  -2  -3   5   18.70    3.20
  -2  -3   5   17.90    3.30
   1   3  -5   16.60    4.50
   1   3  -5   29.70    3.90
   1   3  -5   33.00    5.00
  -1  -3   5   37.00    5.10
  -1  -3   5   33.20    3.90
  -1  -3   5   24.40    4.30
   0   3  -5 1013.90   72.79
   0   3  -5 1094.89   73.39
   0   3  -5 1059.29   73.59
   0  -3   5  993.20   72.79
   0  -3   5 1123.59   73.29
   0  -3   5 1103.09   73.39
  -1   3  -5  454.95   33.00
  -1   3  -5  445.66   33.40
  -1   3  -5  491.75   33.60
   1  -3   5  464.25   33.50
   1  -3   5  467.85   33.00
   1  -3   5  501.25   33.50
  -2   3  -5  741.83   47.30
  -2   3  -5  652.13   47.20
  -2   3  -5  682.03   47.40
   2  -3   5  671.93   47.20
   2  -3   5  660.43   46.90
   2  -3   5  658.33   47.50
  -3   3  -5  314.27   24.80
  -3   3  -5  348.47   25.00
   3  -3   5  359.66   24.60
   3  -3   5  325.47   25.20
   3  -3   5  361.56   25.10
   4  -3   5  944.11   64.99
   5  -3   5  159.78   12.80
   6  -3   5 1383.96   86.89
   6  -3   5 1150.18   86.39
   7  -3   5  443.56   31.20
   7  -3   5  423.76   30.70
   8  -3   5   24.00    4.30
   8  -3   5   38.70    5.50
   9  -3   5   43.90    6.60
   9  -3   5   40.10    5.80
  10  -3   5  238.18   18.70
  10  -3   5  216.68   18.20
  11  -3   5   11.00    5.10
  11  -3   5    8.20    4.90
  12  -3   5  115.59   12.50
  12  -3   5  113.89   13.10
  13  -3   5   18.80    6.70
  13  -3   5   14.90    6.70
  14  -3   5   13.40    6.70
  14  -3   5    8.50    7.50
  15  -3   5   49.30   10.20
  15  -3   5   54.69    9.60
  16  -3   5   26.30   10.00
  16  -3   5   14.10    8.80
  17  -3   5   -3.20    9.30
  17  -3   5    2.30   11.00
  15   2  -5   11.70   23.90
  14   2  -5  -25.60   20.00
  13   2  -5  -10.80   17.90
  12   2  -5   43.50   18.80
  11   2  -5   -0.90    6.00
  11   2  -5  -21.90   15.50
  10   2  -5   -7.10   15.60
  10   2  -5   12.60    5.50
   9   2  -5   10.00    4.80
   9   2  -5  -26.40   11.60
  -9  -2   5   12.40    3.30
   8   2  -5   35.40    5.30
   8   2  -5    1.00   10.90
   7   2  -5    0.40    8.40
  -7  -2   5    8.10    2.30
   6   2  -5   -1.10    7.30
  -6  -2   5    5.40    2.00
   5   2  -5  905.51   65.89
  -5  -2   5  911.41   62.29
  -5  -2   5  926.31   62.69
   4   2  -5  250.47   20.30
  -4  -2   5  230.18   17.70
  -4  -2   5  258.77   17.50
   3   2  -5   77.89    9.40
  -3  -2   5   79.29    6.70
  -3  -2   5   79.49    6.90
   2   2  -5   44.80    6.70
   2   2  -5   48.50    6.60
  -2  -2   5   50.19    5.00
  -2  -2   5   46.00    4.90
  -2  -2   5   51.19    5.70
   1   2  -5  556.64   38.70
   1   2  -5  544.25   37.80
   1   2  -5  518.95   38.50
  -1  -2   5  540.05   38.20
  -1  -2   5  575.94   37.80
   0   2  -5   64.09    6.90
   0   2  -5   60.89    6.60
   0   2  -5   60.99    5.70
   0  -2   5   60.49    6.50
   0  -2   5   59.19    5.70
   0  -2   5   63.69    6.20
  -1   2  -5  907.81   62.29
  -1   2  -5  889.21   61.89
  -1   2  -5  902.71   62.59
   1  -2   5  930.51   62.19
   1  -2   5  878.01   61.89
   1  -2   5  915.91   62.49
  -2   2  -5  382.16   28.80
  -2   2  -5  426.86   29.00
  -2   2  -5  410.56   29.30
   2  -2   5  438.56   29.50
   2  -2   5  405.26   28.90
   2  -2   5  399.56   28.80
  -3   2  -5  602.74   44.80
   3  -2   5  610.94   45.10
   3  -2   5  671.63   44.70
   3  -2   5  682.23   44.60
   5  -2   5   68.79    7.30
   6  -2   5   74.19    8.20
   6  -2   5   79.09    7.10
   7  -2   5  479.35   33.30
   7  -2   5  465.75   33.90
   8  -2   5  212.08   16.50
   8  -2   5  194.98   15.80
   9  -2   5  191.18   15.20
   9  -2   5  170.98   14.90
  10  -2   5  858.91   60.69
  10  -2   5  875.71   60.79
  11  -2   5  296.37   23.30
  11  -2   5  306.67   23.70
  12  -2   5   76.89   11.30
  12  -2   5  100.39   12.90
  13  -2   5  143.79   15.80
  13  -2   5  129.99   14.50
  14  -2   5   14.50    8.00
  14  -2   5   19.80    7.40
  15  -2   5   30.20    9.80
  15  -2   5   42.60    9.30
  16  -2   5   24.30    9.30
  16  -2   5   -2.10    9.60
  17  -2   5   77.69   12.70
  17  -2   5   75.09   14.60
  15   1  -5   39.50   23.40
  14   1  -5   46.20   22.10
  13   1  -5  -33.80   14.90
  12   1  -5   30.30   17.40
  11   1  -5    4.90   15.80
  11   1  -5   14.80    5.70
  10   1  -5  -24.70   13.30
  10   1  -5   -5.50    4.60
 -10  -1   5    1.80    3.40
   9   1  -5  -22.30   11.10
   9   1  -5   -5.10    3.90
  -9  -1   5    3.70    3.00
   8   1  -5  -18.30   10.40
   8   1  -5    6.00    3.60
  -8  -1   5    9.00    2.70
   7   1  -5  203.68   15.30
   6   1  -5   -3.00    7.40
  -6  -1   5    6.20    1.80
   5   1  -5  273.87   26.50
  -5  -1   5  326.17   22.10
  -5  -1   5  342.07   22.50
   4   1  -5 1385.06   94.29
  -4  -1   5 1310.77   91.69
  -4  -1   5 1365.46   91.59
   3   1  -5  847.72   59.59
  -3  -1   5  810.22   57.79
  -3  -1   5  893.21   57.89
   2   1  -5  137.49   11.70
  -2  -1   5  141.49   11.00
  -2  -1   5  143.09   10.30
   1   1  -5 2335.57  153.98
   1   1  -5 2265.97  154.78
   1   1  -5 2169.98  154.48
  -1  -1   5 2355.16  154.28
  -1  -1   5 2245.58  153.98
   0   1  -5 4285.77  283.17
   0   1  -5 3909.31  282.57
   0   1  -5 4032.30  282.27
   0  -1   5 4196.48  282.37
   0  -1   5 4127.79  282.47
   0  -1   5 4524.65  283.17
  -1   1  -5 2768.32  181.38
  -1   1  -5 2678.83  180.68
  -1   1  -5 2677.63  180.88
   1  -1   5 2660.43  181.28
   1  -1   5 2756.82  180.68
   1  -1   5 2471.25  180.68
  -2   1  -5   14.30    2.80
  -2   1  -5   10.50    3.10
  -2   1  -5    8.20    2.00
   2  -1   5   14.00    3.40
   2  -1   5   12.60    2.20
   2  -1   5    9.30    2.30
  -3   1  -5  472.25   33.00
  -3   1  -5  465.15   33.00
   3  -1   5  462.25   32.60
   3  -1   5  462.25   33.10
  -4   1  -5  426.86   33.70
   4  -1   5  497.85   33.30
   4  -1   5  488.95   33.80
   5  -1   5  169.38   13.20
   5  -1   5  155.78   11.90
   6  -1   5   65.09    6.40
   6  -1   5   60.39    7.80
   7  -1   5   74.59    8.60
   7  -1   5   78.69    7.90
   8  -1   5   36.30    5.40
   8  -1   5   42.80    5.90
   9  -1   5  126.59   12.00
   9  -1   5  115.79   11.70
  10  -1   5  737.93   55.29
  10  -1   5  834.02   55.59
  11  -1   5   89.99   11.90
  11  -1   5  109.09   12.70
  12  -1   5   21.60    7.00
  12  -1   5   15.70    6.40
  13  -1   5   -2.50    6.40
  13  -1   5   -2.60    7.00
  14  -1   5   65.29   11.60
  14  -1   5   54.39    9.60
  15  -1   5   -7.00    9.40
  15  -1   5    9.90    8.20
  16  -1   5   84.29   14.50
  16  -1   5   74.29   12.20
  17  -1   5   28.00   13.00
  17  -1   5   45.20   11.50
  15   0  -5  -33.20   16.20
  14   0  -5  -11.60   15.70
  13   0  -5   48.80   17.10
  12   0  -5  -30.30   11.60
  11   0  -5    5.30   13.80
  11   0  -5   15.90    5.60
  10   0  -5  642.44   49.00
 -10   0   5  555.84   40.40
   9   0  -5   -0.30    3.90
   9   0  -5  -14.90    9.80
  -9   0   5   -1.00    2.90
   8   0  -5  852.71   64.29
  -8   0   5  851.71   58.19
   7   0  -5   19.60    8.60
   7   0  -5   26.50    3.60
  -7   0   5   35.40    4.00
  -6   0   5  378.96   26.00
  -5   0   5  663.73   49.20
  -5   0   5  787.42   49.20
   4   0  -5  336.17   26.30
   3   0  -5  365.86   27.10
  -3   0   5  360.76   24.70
   2   0  -5  108.79    7.50
   2   0  -5  110.69    9.40
  -2   0   5  107.09    8.60
  -2   0   5   94.09    7.50
   1   0  -5 2674.03  171.18
   1   0  -5 2591.74  172.28
   1   0  -5 2505.85  171.78
  -1   0   5 2263.87  171.18
  -1   0   5 2633.34  171.58
   0   0  -5 1255.47   84.19
   0   0  -5 1105.19   83.39
   0   0  -5 1280.67   83.29
   0   0   5 1268.87   83.29
   0   0   5 1363.96   84.19
   0   0   5 1093.39   83.29
  -1   0  -5  148.59   11.30
  -1   0  -5  140.49   10.10
  -1   0  -5  142.89   10.20
   1   0   5  131.99    9.80
   1   0   5  148.19   11.10
   1   0   5  114.09   10.30
  -2   0  -5 1152.78   77.69
  -2   0  -5 1124.19   77.39
   2   0   5 1038.30   77.39
   2   0   5 1149.48   77.79
   2   0   5 1192.28   76.79
  -3   0  -5   21.90    3.70
  -3   0  -5   12.30    3.10
   3   0   5   20.20    3.80
   3   0   5   15.30    3.20
  -4   0  -5 1446.66   99.49
   4   0   5 1405.26   99.69
   4   0   5 1447.26   99.79
   4   0   5 1520.25   98.69
   5   0   5 1133.99   76.89
   5   0   5 1118.59   77.69
   6   0   5  261.77   20.10
   6   0   5  259.87   19.20
   7   0   5  192.18   14.90
   7   0   5  172.48   15.00
   8   0   5   86.19    9.70
   8   0   5   76.89    9.70
   9   0   5    7.40    4.90
   9   0   5   20.90    5.30
  10   0   5  321.57   23.60
  10   0   5  258.47   22.80
  11   0   5   11.50    6.80
  11   0   5    5.70    5.80
  12   0   5   31.40    7.30
  12   0   5   23.10    8.00
  13   0   5   22.10    8.00
  13   0   5   25.50    9.50
  14   0   5   -8.60    7.50
  14   0   5   -9.00    8.50
  15   0   5    0.30    8.50
  15   0   5   -3.40   10.20
  16   0   5   81.99   13.30
  16   0   5  103.49   16.50
  17   0   5   16.00   10.80
  17   0   5   -5.30   13.20
  15  -1  -5  -26.10   16.40
  14  -1  -5   49.60   18.20
  13  -1  -5  -25.50   12.30
  12  -1  -5    9.80   12.70
  11  -1  -5  339.57   25.30
  10  -1  -5  121.99   13.50
  10  -1  -5  228.68   23.70
 -10   1   5  179.48   12.90
   9  -1  -5   83.29   13.10
   9  -1  -5   34.30    5.40
  -9   1   5   57.39    6.10
   8  -1  -5    7.40    2.90
   8  -1  -5  -10.90    7.30
  -8   1   5   -1.60    2.40
   7  -1  -5    9.70    2.40
   7  -1  -5   27.30    8.90
  -7   1   5   11.30    2.20
   6  -1  -5   40.20    8.20
   5  -1  -5 1634.54  113.49
   4  -1  -5   56.39    8.10
   3  -1  -5   49.60    6.60
   2  -1  -5   -0.70    2.60
   2  -1  -5    1.30    0.60
  -2   1   5    2.00    0.60
  -2   1   5    1.00    2.40
   1  -1  -5  235.88   16.00
   1  -1  -5  223.28   17.00
  -1   1   5  236.88   16.10
   0  -1  -5  450.55   29.60
   0  -1  -5  450.25   30.50
   0  -1  -5  440.86   29.50
   0   1   5  375.66   29.50
  -1  -1  -5 3457.05  240.68
  -1  -1  -5 3869.41  240.08
   1   1   5 3343.67  240.18
  -2  -1  -5  267.67   19.80
   2   1   5  275.97   19.70
  -3  -1  -5    9.90    2.70
  -3  -1  -5   14.20    3.20
   3   1   5    5.40    1.20
   3   1   5    2.20    2.40
   3   1   5    8.60    3.20
  -4  -1  -5  361.26   25.30
  -4  -1  -5  380.36   25.70
  -4  -1  -5  393.96   24.60
   4   1   5  349.07   25.50
   4   1   5  305.77   25.30
   4   1   5  321.97   24.50
  -5  -1  -5  159.68   14.20
   5   1   5  210.28   14.30
   5   1   5  190.18   15.10
   5   1   5  197.68   15.40
   6   1   5   24.30    4.40
   6   1   5   20.70    5.10
   7   1   5 1995.40  143.19
   7   1   5 2192.08  143.19
   8   1   5  516.75   36.70
   8   1   5  482.65   36.50
   9   1   5  354.96   26.60
   9   1   5  310.57   25.70
  10   1   5  368.06   28.60
  10   1   5  329.97   27.50
  11   1   5   -0.40    7.60
  11   1   5    6.40    6.60
  12   1   5  228.58   23.20
  12   1   5  219.28   20.90
  13   1   5   42.60   11.70
  13   1   5   61.59   10.40
  14   1   5   63.49   11.30
  14   1   5   69.89   13.50
  15   1   5   80.39   12.80
  15   1   5   72.29   15.00
  16   1   5   -9.70   11.70
  16   1   5    5.20    9.80
  17   1   5    6.00   11.00
  17   1   5   22.40   15.30
  15  -2  -5   -3.80   15.60
  14  -2  -5  -17.20   12.50
  13  -2  -5   46.70   13.60
  12  -2  -5   -8.00   10.60
  11  -2  -5   -9.80    8.90
  11  -2  -5    0.60    4.80
  10  -2  -5  365.06   28.50
 -10   2   5  430.06   28.40
   9  -2  -5  157.18   13.60
  -9   2   5  188.98   13.40
   8  -2  -5   40.10    4.80
   8  -2  -5   67.99   10.20
  -8   2   5   46.30    5.60
   7  -2  -5  109.79    9.20
  -7   2   5  134.49    9.30
   6  -2  -5 1223.18   85.79
   5  -2  -5  177.18   16.40
   4  -2  -5  947.81   66.49
[truncated: 1,612,444 more chars]
